# Supplementary material for: Schistosoma immune evasion of NETosis is reversed by aryl hydantoin Ro 13-3978
Source: Research Square preprint supplement (doi:10.21203/rs.3.rs-7453538/v1), 2025-08-26
Supplement: Supplementary file 1 [file 11588e2a2b9f111577ec60ab.xlsx]

## Sheet: PMA_AR02
accession	gene_symbol	coef	logFC	AveExpr	t	P.Value	adj.P.Val	B
Q969P6	TOP1MT	PMA:AR02	-3.24356	14.9081	-12.7746	1.0287e-09	5.61053e-06	11.6274
Q96GX5	MASTL	PMA:AR02	-1.90311	14.6275	-11.5573	4.30367e-09	1.17361e-05	10.4997
Q7Z406	MYH14	PMA:AR02	-1.80971	17.9479	-9.45011	6.98528e-08	0.000126992	8.17061
P19338	NCL	PMA:AR02	-0.748465	15.4915	-7.54308	1.31603e-06	0.0017911	5.56347
P51159	RAB27A	PMA:AR02	-1.28093	16.9317	-7.41029	1.64201e-06	0.0017911	5.36186
Q9Y639	NPTN	PMA:AR02	-1.33634	12.4576	-7.07297	2.91134e-06	0.00262083	4.83734
P07305	H1-0	PMA:AR02	-1.69108	16.1001	-6.98929	3.36373e-06	0.00262083	4.70445
P49795	RGS19	PMA:AR02	-0.937073	16.0479	-6.74219	5.18166e-06	0.0035326	4.30555
Q16762	TST	PMA:AR02	0.491553	14.1811	6.61497	6.49357e-06	0.00357684	4.09641
P35754	GLRX	PMA:AR02	0.851351	19.1115	6.59408	6.74025e-06	0.00357684	4.06182
P0C0S5	H2AZ1	PMA:AR02	-1.34409	16.9966	-6.55609	7.21401e-06	0.00357684	3.99874
Q14050	COL9A3	PMA:AR02	3.07171	12.1236	6.42922	9.06426e-06	0.00411971	3.78644
Q00526	CDK3	PMA:AR02	-2.42538	12.7101	-6.30096	1.14431e-05	0.00447379	3.56923
Q92599	SEPTIN8	PMA:AR02	0.595	16.1471	6.27324	1.2038e-05	0.00447379	3.52193
O75695	RP2	PMA:AR02	0.433162	17.1563	6.26129	1.23042e-05	0.00447379	3.50151
P30273	FCER1G	PMA:AR02	-1.32901	16.521	-6.11214	1.61935e-05	0.00551996	3.24474
P61457	PCBD1	PMA:AR02	-0.549915	13.5839	-5.9216	2.31016e-05	0.00691606	2.9117
Q70E73	RAPH1	PMA:AR02	-1.08925	13.306	-5.91875	2.32258e-05	0.00691606	2.90667
O95168	NDUFB4	PMA:AR02	0.593635	13.8008	5.89923	2.40934e-05	0.00691606	2.87223
Q9Y584	TIMM22	PMA:AR02	0.56452	11.8805	5.79676	2.92346e-05	0.00786082	2.69048
Q9Y4F1	FARP1	PMA:AR02	0.823178	13.3049	5.77185	3.06486e-05	0.00786082	2.64605
P49321	NASP	PMA:AR02	-0.837394	13.2028	-5.75395	3.17085e-05	0.00786082	2.61407
Q8IVW4	CDKL3	PMA:AR02	-1.92254	13.1868	-5.64324	3.91648e-05	0.00911511	2.4152
Q96AY2	EME1	PMA:AR02	1.88789	13.6049	5.58552	4.37514e-05	0.00911511	2.31081
O60234	GMFG	PMA:AR02	-1.22744	17.1337	-5.56318	4.56725e-05	0.00911511	2.27028
Q9HD15	SRA1	PMA:AR02	0.536518	13.9805	5.53996	4.77627e-05	0.00911511	2.22807
P49662	CASP4	PMA:AR02	-0.730739	13.5266	-5.53643	4.80883e-05	0.00911511	2.22166
O43236	SEPTIN4	PMA:AR02	0.59756	13.807	5.53247	4.84577e-05	0.00911511	2.21444
O14802	POLR3A	PMA:AR02	-2.07305	18.2596	-5.5136	5.02557e-05	0.00911511	2.18006
Q9H0Z9	RBM38	PMA:AR02	-2.03823	15.8094	-5.51148	5.0462e-05	0.00911511	2.17619
O43633	CHMP2A	PMA:AR02	-0.568629	15.1258	-5.49784	5.18094e-05	0.00911511	2.15132
Q6IS14	EIF5AL1	PMA:AR02	-1.79335	14.2671	-5.479	5.37335e-05	0.0091582	2.1169
Q68D91	MBLAC2	PMA:AR02	1.36392	10.1965	5.44025	5.7926e-05	0.0093964	2.04595
P49207	RPL34	PMA:AR02	-1.58501	14.4225	-5.4345	5.85768e-05	0.0093964	2.03539
P42685	FRK	PMA:AR02	-0.815993	15.0316	-5.38374	6.46556e-05	0.0098627	1.9421
Q96DT5	DNAH11	PMA:AR02	2.04894	17.6736	5.38022	6.51003e-05	0.0098627	1.93562
Q8IUC8	GALNT13	PMA:AR02	-1.25428	13.257	-5.32724	7.21953e-05	0.0105844	1.83782
Q8TAF3	WDR48	PMA:AR02	0.547804	12.8992	5.30872	7.48597e-05	0.0105844	1.80355
Q8IVV7	GID4	PMA:AR02	1.01438	10.5115	5.30311	7.56857e-05	0.0105844	1.79317
Q9Y2U5	MAP3K2	PMA:AR02	0.533019	13.4126	5.27853	7.94216e-05	0.0107484	1.74759
P35030	PRSS3	PMA:AR02	0.974408	12.944	5.26566	8.14538e-05	0.0107484	1.72368
Q9UHX1	PUF60	PMA:AR02	0.414261	14.0669	5.25749	8.27713e-05	0.0107484	1.7085
Q15907	RAB11B	PMA:AR02	-0.689637	18.1122	-5.24036	8.56049e-05	0.0108579	1.67664
Q06546	GABPA	PMA:AR02	-0.767761	12.69	-5.20513	9.1753e-05	0.0113732	1.61098
P62081	RPS7	PMA:AR02	-0.974516	16.3903	-5.16906	9.85206e-05	0.0117508	1.5436
O60603	TLR2	PMA:AR02	0.42514	14.3398	5.16605	9.91086e-05	0.0117508	1.53796
Q14694	USP10	PMA:AR02	0.482014	12.1451	5.13461	0.000105465	0.0122384	1.47908
Q8TAT6	NPLOC4	PMA:AR02	0.386085	13.0702	5.11673	0.000109268	0.0124155	1.44552
Q15427	SF3B4	PMA:AR02	0.685735	11.943	5.07859	0.000117855	0.0131179	1.37383
Q99549	MPHOSPH8	PMA:AR02	0.604329	12.7929	5.01276	0.00013435	0.0146549	1.24965
Q8WVC6	DCAKD	PMA:AR02	0.445273	15.3626	4.99879	0.000138147	0.0147736	1.22322
P05155	SERPING1	PMA:AR02	0.623415	11.0621	4.97526	0.000144791	0.0151036	1.17867
P36873	PPP1CC	PMA:AR02	0.385818	16.7879	4.96847	0.000146771	0.0151036	1.16578
Q9ULD2	MTUS1	PMA:AR02	0.83159	11.9803	4.94411	0.0001541	0.0155641	1.11957
O43678	NDUFA2	PMA:AR02	0.47257	14.7646	4.92083	0.000161454	0.015849	1.07533
O15533	TAPBP	PMA:AR02	0.479547	14.3255	4.91524	0.000163275	0.015849	1.06469
P52815	MRPL12	PMA:AR02	0.469418	13.1321	4.9002	0.000168275	0.015849	1.03607
P49327	FASN	PMA:AR02	0.322153	17.499	4.89677	0.000169436	0.015849	1.02955
P01857		PMA:AR02	0.92179	15.5396	4.88617	0.000173082	0.015849	1.00935
Q13363	CTBP1	PMA:AR02	0.35553	15.2974	4.88251	0.000174357	0.015849	1.00238
P53675	CLTCL1	PMA:AR02	1.25061	12.3776	4.86585	0.000180292	0.0161199	0.97061
Q96BX8	MOB3A	PMA:AR02	0.563692	15.162	4.83901	0.000190297	0.0165265	0.919348
Q5RKV6	EXOSC6	PMA:AR02	0.590148	13.2419	4.82981	0.000193854	0.0165265	0.901768
P68402	PAFAH1B2	PMA:AR02	0.565119	16.6296	4.81846	0.000198339	0.0165265	0.880053
Q9NPF4	OSGEP	PMA:AR02	0.466091	13.6979	4.81133	0.000201209	0.0165265	0.866414
Q14194	CRMP1	PMA:AR02	0.437086	15.3277	4.79616	0.000207464	0.0165265	0.837348
P48736	PIK3CG	PMA:AR02	0.458954	13.0672	4.79152	0.000209415	0.0165265	0.828464
P62277	RPS13	PMA:AR02	-0.471981	16.5649	-4.78195	0.000213501	0.0165265	0.810115
Q92574	TSC1	PMA:AR02	0.522975	11.9096	4.78149	0.000213699	0.0165265	0.809237
O76003	GLRX3	PMA:AR02	0.469255	14.6671	4.77438	0.000216792	0.0165265	0.795591
Q9GZQ3	COMMD5	PMA:AR02	0.585174	14.0248	4.76597	0.000220508	0.0165265	0.779454
P09417	QDPR	PMA:AR02	0.374966	14.7755	4.76147	0.00022252	0.0165265	0.77083
Q13277	STX3	PMA:AR02	-0.662061	13.3813	-4.73259	0.00023591	0.0165265	0.715337
O15040	TECPR2	PMA:AR02	0.321891	14.2161	4.72701	0.000238593	0.0165265	0.704599
Q9Y2V2	CARHSP1	PMA:AR02	-0.589998	14.8756	-4.72367	0.000240209	0.0165265	0.698188
Q9NVI1	FANCI	PMA:AR02	-0.750356	14.4921	-4.71737	0.000243297	0.0165265	0.686056
Q96NY7	CLIC6	PMA:AR02	2.54517	12.0246	4.71703	0.000243464	0.0165265	0.685401
Q9ULV0	MYO5B	PMA:AR02	1.19542	13.6029	4.71473	0.000244603	0.0165265	0.680972
Q6NVV1		PMA:AR02	-2.42965	13.2199	-4.70594	0.000248999	0.0165265	0.664052
Q13404	UBE2V1	PMA:AR02	0.404193	16.3643	4.69954	0.000252251	0.0165265	0.651729
A8MVS5	C19orf38	PMA:AR02	0.916216	15.0892	4.69644	0.000253841	0.0165265	0.645759
Q9UJZ1	STOML2	PMA:AR02	0.582584	13.101	4.6954	0.000254376	0.0165265	0.643761
P16930	FAH	PMA:AR02	0.364566	15.8297	4.69363	0.000255295	0.0165265	0.640336
P06703	S100A6	PMA:AR02	-0.472718	18.5678	-4.69144	0.000256428	0.0165265	0.636128
Q9NR28	DIABLO	PMA:AR02	0.460165	12.9802	4.68927	0.000257563	0.0165265	0.631933
O75132	ZBED4	PMA:AR02	0.658811	15.0348	4.68092	0.000261962	0.0166133	0.615848
P16520	GNB3	PMA:AR02	-1.76482	14.4513	-4.66584	0.000270109	0.016933	0.586756
Q9HA64	FN3KRP	PMA:AR02	0.66735	14.1305	4.6343	0.000287996	0.0176491	0.525844
Q9H853		PMA:AR02	0.517193	17.5631	4.63156	0.000289606	0.0176491	0.520546
P14406	COX7A2	PMA:AR02	-1.8551	15.3356	-4.6288	0.00029124	0.0176491	0.515201
Q9UFG5	C19orf25	PMA:AR02	2.34583	14.0987	4.60859	0.000303475	0.0181885	0.476106
Q8TEA8	DTD1	PMA:AR02	-1.01754	11.5548	-4.59863	0.000309696	0.0183596	0.456826
O14896	IRF6	PMA:AR02	-2.16968	15.2411	-4.58843	0.000316203	0.0183819	0.43707
P28070	PSMB4	PMA:AR02	0.408701	15.7888	4.58706	0.000317088	0.0183819	0.434415
P63279	UBE2I	PMA:AR02	0.559294	17.365	4.5823	0.000320183	0.0183819	0.425186
Q9H4K7	MTG2	PMA:AR02	0.859709	10.7088	4.5769	0.000323727	0.0183917	0.414726
O00241	SIRPB1	PMA:AR02	-0.768024	12.5069	-4.57151	0.00032731	0.0184036	0.404269
Q9H008	LHPP	PMA:AR02	-0.745162	14.1753	-4.54972	0.000342196	0.0189283	0.362008
A0A1B0GUS4		PMA:AR02	0.64955	15.4129	4.54003	0.000349039	0.0189283	0.343195
P20138	CD33	PMA:AR02	1.01946	12.6206	4.53457	0.000352956	0.0189283	0.33259
O60869	EDF1	PMA:AR02	-0.837233	15.0783	-4.5288	0.000357148	0.0189283	0.321372
Q9UKL6	PCTP	PMA:AR02	0.432197	13.5227	4.52732	0.000358228	0.0189283	0.318501
P54840	GYS2	PMA:AR02	0.523214	15.8976	4.51637	0.000366343	0.0189283	0.297215
P15531	NME1	PMA:AR02	0.667346	16.1324	4.51524	0.000367192	0.0189283	0.295017
P50995	ANXA11	PMA:AR02	-0.407718	18.0454	-4.5131	0.000368804	0.0189283	0.290853
Q7Z6J8	UBE3D	PMA:AR02	-0.562192	13.7444	-4.51	0.000371146	0.0189283	0.284838
Q15418	RPS6KA1	PMA:AR02	0.451581	14.9334	4.5095	0.000371529	0.0189283	0.283859
Q96N67	DOCK7	PMA:AR02	-0.991674	13.5236	-4.50519	0.000374818	0.0189283	0.275484
O75629	CREG1	PMA:AR02	0.835313	13.6331	4.48634	0.000389575	0.019493	0.238788
P61966	AP1S1	PMA:AR02	-0.788578	12.1131	-4.4731	0.000400286	0.0198469	0.213014
Q9H0U3	MAGT1	PMA:AR02	-0.559856	14.395	-4.46735	0.000405033	0.0199013	0.201811
Q8IZQ5	SELENOH	PMA:AR02	-0.914217	13.4721	-4.45281	0.00041729	0.0203205	0.173479
Q9BR76	CORO1B	PMA:AR02	0.301504	14.7287	4.43873	0.000429528	0.0207314	0.14601
Q7Z6M1	RABEPK	PMA:AR02	0.685831	11.1987	4.42829	0.000438834	0.0209947	0.125642
P20339	RAB5A	PMA:AR02	0.367275	18.9086	4.41369	0.000452191	0.0213899	0.0971491
Q86XE0	SNX32	PMA:AR02	1.34908	9.43972	4.41075	0.000454937	0.0213899	0.0913952
P20160	AZU1	PMA:AR02	-0.915855	21.2636	-4.40404	0.00046125	0.021482	0.0782989
P49448	GLUD2	PMA:AR02	-0.693501	14.1384	-4.39931	0.000465761	0.021482	0.06905
Q14643	ITPR1	PMA:AR02	0.415397	16.1667	4.39624	0.000468712	0.021482	0.0630487
P68371	TUBB4B	PMA:AR02	1.06067	15.5778	4.35954	0.000505483	0.0227552	-0.00872148
Q9C037	TRIM4	PMA:AR02	0.487329	12.8136	4.35698	0.000508155	0.0227552	-0.0137324
Q6GMV3	PTRHD1	PMA:AR02	0.618642	12.879	4.3558	0.000509396	0.0227552	-0.0160496
O00186	STXBP3	PMA:AR02	0.394232	14.5254	4.3522	0.000513181	0.0227552	-0.0230846
Q9NR12	PDLIM7	PMA:AR02	0.501174	16.1351	4.34621	0.00051956	0.0228523	-0.0348233
P10301	RRAS	PMA:AR02	-1.09517	12.2735	-4.32269	0.000545375	0.0237958	-0.0809018
Q86VI3	IQGAP3	PMA:AR02	-1.72121	12.2185	-4.3179	0.000550782	0.023841	-0.0902755
Q92729	PTPRU	PMA:AR02	0.757378	15.5626	4.31201	0.000557522	0.0239427	-0.101833
Q9NRH3	TUBG2	PMA:AR02	-1.05483	13.6263	-4.30109	0.000570224	0.024149	-0.123239
P31150	GDI1	PMA:AR02	0.347984	18.0577	4.29632	0.000575872	0.024149	-0.132604
Q8TBC3	SHKBP1	PMA:AR02	0.437688	13.0044	4.29445	0.000578103	0.024149	-0.136278
P04839	CYBB	PMA:AR02	0.365472	19.4768	4.29283	0.000580037	0.024149	-0.139451
Q12789	GTF3C1	PMA:AR02	0.313607	16.9697	4.27583	0.000600761	0.0248223	-0.172806
P42356	PI4KA	PMA:AR02	0.387722	18.5511	4.27182	0.000605758	0.0248406	-0.180678
Q08945	SSRP1	PMA:AR02	0.290475	14.3268	4.26134	0.00061903	0.0251954	-0.201269
Q96Q05	TRAPPC9	PMA:AR02	0.378377	14.4814	4.25093	0.000632492	0.0253026	-0.221709
Q96QG7	MTMR9	PMA:AR02	0.486539	12.6629	4.24974	0.000634055	0.0253026	-0.224054
C9JRZ8	AKR1B15	PMA:AR02	-1.61829	12.0895	-4.24858	0.000635581	0.0253026	-0.226338
P21399	ACO1	PMA:AR02	0.384832	15.4068	4.24061	0.000646143	0.025459	-0.241997
P43490	NAMPT	PMA:AR02	0.372324	18.6789	4.23323	0.000656081	0.025459	-0.256498
Q9Y4Z0	LSM4	PMA:AR02	0.551509	13.8523	4.2321	0.000657614	0.025459	-0.258714
Q13114	TRAF3	PMA:AR02	0.856987	10.799	4.23169	0.00065818	0.025459	-0.259532
P51817	PRKX	PMA:AR02	-1.60596	13.9382	-4.22507	0.000667254	0.0255171	-0.27254
Q6NYC8	PPP1R18	PMA:AR02	-0.66007	13.8392	-4.21964	0.000674796	0.0255171	-0.283218
P42679	MATK	PMA:AR02	0.559163	15.297	4.21847	0.000676436	0.0255171	-0.285524
P32314	FOXN2	PMA:AR02	2.51568	14.2501	4.21707	0.000678397	0.0255171	-0.288273
A6NGU5		PMA:AR02	-0.426612	13.2632	-4.21312	0.000683964	0.0255503	-0.296038
Q9H875	PRKRIP1	PMA:AR02	0.723556	10.7229	4.20782	0.000691514	0.0256566	-0.306466
Q13627	DYRK1A	PMA:AR02	0.546542	12.1652	4.19805	0.000705652	0.0260042	-0.325693
O43583	DENR	PMA:AR02	-1.07274	13.6425	-4.19478	0.000710451	0.0260054	-0.332131
Q96BI1	SLC22A18	PMA:AR02	0.599791	12.1976	4.18999	0.000717542	0.0260568	-0.341565
Q13393	PLD1	PMA:AR02	0.410076	13.9234	4.18739	0.000721411	0.0260568	-0.346673
Q8N1K5	THEMIS	PMA:AR02	-0.808456	15.3896	-4.18126	0.000730632	0.0261351	-0.358738
P08865	RPSA	PMA:AR02	0.427356	15.9941	4.17935	0.000733533	0.0261351	-0.362501
Q9UL26	RAB22A	PMA:AR02	-0.872741	13.396	-4.1738	0.000742028	0.0261351	-0.373438
O95292	VAPB	PMA:AR02	0.585782	16.159	4.17255	0.000743952	0.0261351	-0.375898
Q15910	EZH2	PMA:AR02	0.621438	16.1511	4.16191	0.000760544	0.0261351	-0.396849
Q01130	SRSF2	PMA:AR02	-1.61224	15.8443	-4.16107	0.000761881	0.0261351	-0.398517
Q9Y3R5	DOP1B	PMA:AR02	0.327154	14.5644	4.16063	0.000762573	0.0261351	-0.39938
Q9NYU2	UGGT1	PMA:AR02	0.318493	14.3654	4.16008	0.000763439	0.0261351	-0.400458
P20839	IMPDH1	PMA:AR02	0.336413	15.2468	4.15802	0.000766706	0.0261351	-0.404514
P08754	GNAI3	PMA:AR02	-0.652472	15.9561	-4.15447	0.000772384	0.0261651	-0.411521
P15927	RPA2	PMA:AR02	0.331248	14.5564	4.14627	0.000785631	0.0262276	-0.427673
A8MXV4	NUDT19	PMA:AR02	0.979553	13.3063	4.14499	0.000787732	0.0262276	-0.430208
P00492	HPRT1	PMA:AR02	0.36115	16.2414	4.14097	0.000794329	0.0262276	-0.438129
Q92995	USP13	PMA:AR02	1.12647	10.718	4.1394	0.000796914	0.0262276	-0.441214
Q15393	SF3B3	PMA:AR02	0.317323	14.6247	4.1371	0.000800738	0.0262276	-0.445761
Q92747	ARPC1A	PMA:AR02	0.388349	13.9978	4.13451	0.000805055	0.0262276	-0.450868
Q8TE77	SSH3	PMA:AR02	0.407886	16.8364	4.13281	0.00080789	0.0262276	-0.454206
P07203	GPX1	PMA:AR02	0.306807	15.9382	4.12224	0.000825828	0.0266513	-0.475061
Q9Y6W5	WASF2	PMA:AR02	-0.529331	14.2348	-4.11756	0.000833893	0.0267169	-0.48429
P13489	RNH1	PMA:AR02	0.384554	18.0387	4.11539	0.00083766	0.0267169	-0.48857
Q8IWZ3	ANKHD1	PMA:AR02	0.426138	16.2736	4.1102	0.000846737	0.0268495	-0.498805
P25325	MPST	PMA:AR02	0.343459	14.4528	4.10314	0.000859243	0.0270885	-0.512727
Q969M3	YIPF5	PMA:AR02	0.522519	13.9199	4.09914	0.000866414	0.0271576	-0.520619
Q9ULZ3	PYCARD	PMA:AR02	0.571317	18.4862	4.09578	0.000872496	0.027192	-0.527261
P62318	SNRPD3	PMA:AR02	-0.895076	16.6159	-4.08194	0.000897959	0.0277961	-0.554574
Q03519	TAP2	PMA:AR02	0.415387	15.1481	4.07901	0.000903442	0.0277961	-0.560354
O15116	LSM1	PMA:AR02	0.596906	13.9582	4.07703	0.000907169	0.0277961	-0.564262
Q6GTX8	LAIR1	PMA:AR02	-0.585135	14.3628	-4.06937	0.000921744	0.02792	-0.579395
Q9ULA0	DNPEP	PMA:AR02	0.521415	14.2201	4.06912	0.000922217	0.02792	-0.579881
Q5SRE5	NUP188	PMA:AR02	0.329518	16.0242	4.06607	0.000928079	0.02792	-0.585897
Q9NTN3	SLC35D1	PMA:AR02	0.56355	11.8138	4.06396	0.00093218	0.02792	-0.590082
P0CG04		PMA:AR02	1.14735	12.1986	4.05984	0.000940203	0.02792	-0.598218
Q96DM3	RMC1	PMA:AR02	0.336686	13.5025	4.05895	0.00094193	0.02792	-0.59996
O14920	IKBKB	PMA:AR02	0.340378	13.8152	4.05535	0.000949019	0.0279685	-0.607078
P45983	MAPK8	PMA:AR02	0.542601	13.5124	4.05292	0.000953822	0.0279685	-0.611871
O75396	SEC22B	PMA:AR02	-0.492514	14.0703	-4.0449	0.000969893	0.0282779	-0.627732
Q9C0I4		PMA:AR02	1.21871	11.4541	4.04023	0.000979353	0.0282779	-0.636945
P62888	RPL30	PMA:AR02	0.356038	15.6633	4.03995	0.000979926	0.0282779	-0.6375
Q07960	ARHGAP1	PMA:AR02	0.421722	16.9668	4.03289	0.000994441	0.0285457	-0.651457
O60449	LY75	PMA:AR02	0.54927	12.509	4.02695	0.00100682	0.0287498	-0.663202
P11215	ITGAM	PMA:AR02	0.322482	18.7401	4.02174	0.00101779	0.0287875	-0.673484
Q9UHV9	PFDN2	PMA:AR02	-0.408312	14.7454	-4.0185	0.00102468	0.0287875	-0.679889
P48739	PITPNB	PMA:AR02	-0.330178	13.4885	-4.01124	0.00104029	0.0287875	-0.69424
P78406	RAE1	PMA:AR02	0.325788	13.398	4.01025	0.00104244	0.0287875	-0.696195
P17213	BPI	PMA:AR02	0.366677	19.415	4.0067	0.00105018	0.0287875	-0.703215
Q9UHB7	AFF4	PMA:AR02	0.755108	11.6293	4.00587	0.001052	0.0287875	-0.704864
Q53GL7	PARP10	PMA:AR02	0.446023	13.1444	4.00562	0.00105254	0.0287875	-0.705351
P48595	SERPINB10	PMA:AR02	0.45001	17.3495	4.00506	0.00105378	0.0287875	-0.706463
O00629	KPNA4	PMA:AR02	-0.471498	12.8939	-4.00086	0.00106304	0.0287875	-0.714764
P30048	PRDX3	PMA:AR02	0.395083	17.4869	3.99957	0.0010659	0.0287875	-0.717314
Q9H4G4	GLIPR2	PMA:AR02	0.500402	16.2009	3.99932	0.00106646	0.0287875	-0.717813
A0AV96	RBM47	PMA:AR02	0.417986	12.9314	3.99707	0.00107148	0.0287875	-0.722273
Q99848	EBNA1BP2	PMA:AR02	-1.1769	11.1326	-3.99107	0.00108494	0.0290063	-0.734121
Q2TAY7	SMU1	PMA:AR02	0.42451	13.9	3.98824	0.00109137	0.0290358	-0.739726
Q9NVH2	INTS7	PMA:AR02	0.368648	11.9937	3.98247	0.00110458	0.0292447	-0.751145
Q92890	UFD1	PMA:AR02	0.329245	15.449	3.97997	0.00111036	0.0292461	-0.756093
P57088	TMEM33	PMA:AR02	0.339377	14.9513	3.97781	0.00111536	0.0292461	-0.76036
Q86TV6	TTC7B	PMA:AR02	0.704653	11.5666	3.97547	0.00112082	0.0292484	-0.764986
Q9UFC0	LRWD1	PMA:AR02	0.565682	14.6534	3.972	0.00112895	0.0293205	-0.77185
Q15120	PDK3	PMA:AR02	0.321604	14.4508	3.96965	0.00113451	0.0293252	-0.776508
Q14166	TTLL12	PMA:AR02	0.48044	15.2576	3.96489	0.00114582	0.0294779	-0.78592
O00712	NFIB	PMA:AR02	-1.26142	17.1208	-3.96223	0.0011522	0.0295029	-0.791191
P21333	FLNA	PMA:AR02	0.331339	18.5847	3.95951	0.00115875	0.0295319	-0.796566
P01011	SERPINA3	PMA:AR02	-0.630562	13.7819	-3.95578	0.00116781	0.0296242	-0.80395
Q9UK45	LSM7	PMA:AR02	-0.733281	14.7601	-3.9421	0.00120161	0.0303405	-0.831016
P07902	GALT	PMA:AR02	0.504475	13.3294	3.93788	0.00121224	0.0304677	-0.839374
Q9BV68	RNF126	PMA:AR02	0.478887	13.2246	3.93568	0.00121782	0.0304677	-0.843727
Q9BQF6	SENP7	PMA:AR02	0.589108	11.805	3.92452	0.0012465	0.0310431	-0.865811
O00148	DDX39A	PMA:AR02	-0.42883	14.053	-3.91671	0.001267	0.0312947	-0.88128
P62829	RPL23	PMA:AR02	-0.580827	14.5907	-3.9129	0.00127714	0.0312947	-0.888835
O60244	MED14	PMA:AR02	0.467857	11.6702	3.91246	0.00127831	0.0312947	-0.889703
P14324	FDPS	PMA:AR02	-0.341335	14.9382	-3.91199	0.00127956	0.0312947	-0.890633
Q92630	DYRK2	PMA:AR02	-0.870406	15.831	-3.89978	0.00131261	0.0318353	-0.914812
P62273	RPS29	PMA:AR02	-1.26398	13.5577	-3.89903	0.00131466	0.0318353	-0.916295
P56377	AP1S2	PMA:AR02	-0.625911	15.4138	-3.89739	0.00131917	0.0318353	-0.919545
Q6F5E8	CARMIL2	PMA:AR02	-1.28063	14.3375	-3.89067	0.00133782	0.0321431	-0.932854
Q9NUQ8	ABCF3	PMA:AR02	0.318952	14.2753	3.88734	0.00134715	0.0322254	-0.939446
Q8NBS9	TXNDC5	PMA:AR02	0.350962	14.1702	3.88333	0.00135847	0.0323541	-0.947374
Q8WXF0	SRSF12	PMA:AR02	-0.844471	12.6052	-3.86239	0.00141925	0.0336216	-0.988868
Q9Y2K2	SIK3	PMA:AR02	0.898212	12.3705	3.86046	0.00142498	0.0336216	-0.992688
Q9Y5B8	NME7	PMA:AR02	0.996303	10.1616	3.85872	0.00143018	0.0336216	-0.996142
Q96G01	BICD1	PMA:AR02	-0.866881	11.7724	-3.85153	0.00145184	0.0338365	-1.01039
Q86VX2	COMMD7	PMA:AR02	0.439831	14.5806	3.84914	0.0014591	0.0338365	-1.01511
Q16543	CDC37	PMA:AR02	-0.565433	16.0028	-3.84672	0.00146648	0.0338365	-1.0199
P09669	COX6C	PMA:AR02	-1.50659	14.5431	-3.84522	0.00147109	0.0338365	-1.02287
P22732	SLC2A5	PMA:AR02	-0.564998	13.1182	-3.84361	0.00147605	0.0338365	-1.02606
Q96J02	ITCH	PMA:AR02	0.349081	11.9936	3.84163	0.0014822	0.0338365	-1.03
Q6P4A8	PLBD1	PMA:AR02	0.656246	16.8672	3.84145	0.00148275	0.0338365	-1.03035
Q9NRV9	HEBP1	PMA:AR02	0.472958	13.5748	3.83588	0.0015001	0.0340583	-1.04138
Q9H8X2	IPPK	PMA:AR02	-1.4293	18.6642	-3.83434	0.00150496	0.0340583	-1.04444
O95674	CDS2	PMA:AR02	0.618281	12.9673	3.83219	0.00151172	0.0340698	-1.04869
Q13409	DYNC1I2	PMA:AR02	-0.970727	12.0756	-3.82716	0.00152773	0.0341799	-1.05867
P50750	CDK9	PMA:AR02	-0.53334	18.0835	-3.82512	0.00153426	0.0341799	-1.06271
P35475	IDUA	PMA:AR02	-0.611138	11.0379	-3.82476	0.0015354	0.0341799	-1.06342
O60942	RNGTT	PMA:AR02	0.946539	10.3363	3.82042	0.00154939	0.0343511	-1.07201
Q6UWP2	DHRS11	PMA:AR02	0.781709	11.0992	3.81495	0.00156724	0.0346062	-1.08287
P57764	GSDMD	PMA:AR02	0.481871	14.8633	3.81102	0.00158016	0.0346682	-1.09064
O94905	ERLIN2	PMA:AR02	0.408311	14.745	3.81023	0.00158276	0.0346682	-1.0922
P30613	PKLR	PMA:AR02	-0.633655	18.2483	-3.80679	0.00159422	0.0347795	-1.09904
P00390	GSR	PMA:AR02	0.401558	18.142	3.79989	0.00161738	0.0350618	-1.1127
Q14116	IL18	PMA:AR02	-0.464989	14.8533	-3.79911	0.00162002	0.0350618	-1.11424
Q8TAQ5	ZNF420	PMA:AR02	0.528324	16.5782	3.78962	0.00165252	0.035624	-1.13306
P04040	CAT	PMA:AR02	0.380995	19.7771	3.78628	0.00166411	0.0357325	-1.13968
Q9NP97	DYNLRB1	PMA:AR02	1.27255	12.0562	3.77888	0.00169008	0.0361479	-1.15435
Q7L5N1	COPS6	PMA:AR02	0.27868	13.5457	3.76958	0.00172329	0.0367142	-1.17278
P13984	GTF2F2	PMA:AR02	0.307855	13.5479	3.76674	0.00173357	0.0367895	-1.17841
Q15370	ELOB	PMA:AR02	0.399912	15.1969	3.7622	0.00175013	0.0368865	-1.18741
P50851	LRBA	PMA:AR02	0.327202	12.7781	3.75857	0.00176346	0.0368865	-1.19459
Q9Y3L3	SH3BP1	PMA:AR02	-0.54952	13.1679	-3.75804	0.00176543	0.0368865	-1.19565
C9JLW8	MCRIP1	PMA:AR02	0.741005	11.3156	3.75694	0.00176949	0.0368865	-1.19783
P08311	CTSG	PMA:AR02	-0.513166	20.9575	-3.75447	0.00177866	0.0368865	-1.20272
P62136	PPP1CA	PMA:AR02	0.449502	17.0066	3.75445	0.00177872	0.0368865	-1.20275
O60229	KALRN	PMA:AR02	-0.866469	10.3255	-3.75159	0.00178941	0.0369676	-1.20842
Q96BY9	SARAF	PMA:AR02	0.563765	12.0886	3.74247	0.0018239	0.037474	-1.2265
Q96NJ6	ZFP3	PMA:AR02	0.960731	12.5771	3.73956	0.00183507	0.037474	-1.23228
P00846	ATP6	PMA:AR02	0.53596	14.7173	3.73824	0.00184014	0.037474	-1.23489
O00391	QSOX1	PMA:AR02	0.336465	16.6687	3.7363	0.00184763	0.037474	-1.23873
P09668	CTSH	PMA:AR02	0.489201	12.6535	3.73538	0.0018512	0.037474	-1.24056
Q96ER9	CCDC51	PMA:AR02	1.04135	9.55858	3.73373	0.00185758	0.037474	-1.24382
O15117	FYB1	PMA:AR02	0.430735	14.5819	3.73012	0.00187168	0.037474	-1.25097
Q8WVM7	STAG1	PMA:AR02	-0.364395	13.4857	-3.72843	0.00187832	0.037474	-1.25433
Q06210	GFPT1	PMA:AR02	0.33692	14.0583	3.72834	0.00187866	0.037474	-1.2545
Q02252	ALDH6A1	PMA:AR02	0.320778	13.5857	3.72734	0.00188263	0.037474	-1.2565
P80217	IFI35	PMA:AR02	0.451298	15.5178	3.72498	0.00189194	0.0375224	-1.26117
Q9NPB8	GPCPD1	PMA:AR02	0.373572	13.7984	3.72277	0.00190072	0.0375599	-1.26555
P62314	SNRPD1	PMA:AR02	-0.599264	15.6056	-3.71788	0.00192029	0.0376391	-1.27524
Q9UKF6	CPSF3	PMA:AR02	0.276917	16.5655	3.71755	0.00192162	0.0376391	-1.2759
Q6NZY4	ZCCHC8	PMA:AR02	0.483621	12.0481	3.7166	0.00192543	0.0376391	-1.27777
Q5T0F9	CC2D1B	PMA:AR02	-0.293208	12.8088	-3.7129	0.00194042	0.0377462	-1.28511
Q92538	GBF1	PMA:AR02	0.367906	12.8779	3.71183	0.00194475	0.0377462	-1.28722
P55160	NCKAP1L	PMA:AR02	0.249054	15.8937	3.70719	0.00196376	0.0379312	-1.29643
O00505	KPNA3	PMA:AR02	0.368197	14.8087	3.70474	0.00197386	0.0379312	-1.30128
A8MTJ3	GNAT3	PMA:AR02	-1.0344	19.344	-3.70376	0.00197793	0.0379312	-1.30323
Q7LBR1	CHMP1B	PMA:AR02	-0.770229	15.8702	-3.70275	0.0019821	0.0379312	-1.30522
Q9NZJ7	MTCH1	PMA:AR02	0.566471	11.1201	3.69821	0.00200107	0.0381132	-1.31423
Q09028	RBBP4	PMA:AR02	-0.338167	14.7234	-3.69713	0.00200559	0.0381132	-1.31637
Q86YS7	C2CD5	PMA:AR02	0.37166	13.2825	3.69111	0.00203104	0.0383201	-1.3283
P02679	FGG	PMA:AR02	0.383882	14.0607	3.68631	0.00205157	0.0383201	-1.33781
P47813	EIF1AX	PMA:AR02	-0.876191	12.6167	-3.68464	0.00205876	0.0383201	-1.34112
Q8ND24	RNF214	PMA:AR02	0.408589	17.5993	3.68433	0.00206007	0.0383201	-1.34173
Q9UBV8	PEF1	PMA:AR02	-0.413721	14.1133	-3.68414	0.0020609	0.0383201	-1.34211
Q8NFD5	ARID1B	PMA:AR02	0.803228	10.4315	3.67529	0.00209948	0.0383201	-1.35965
P20292	ALOX5AP	PMA:AR02	-0.64113	18.9023	-3.67517	0.0021	0.0383201	-1.35988
P07766	CD3E	PMA:AR02	-0.692051	10.6552	-3.6748	0.0021016	0.0383201	-1.3606
Q9HD42	CHMP1A	PMA:AR02	-0.881014	13.669	-3.6748	0.00210164	0.0383201	-1.36062
P60983	GMFB	PMA:AR02	-0.829516	13.534	-3.6747	0.00210205	0.0383201	-1.36081
P08559	PDHA1	PMA:AR02	0.260261	15.016	3.6726	0.00211132	0.0383201	-1.36497
P00491	PNP	PMA:AR02	0.35562	18.9452	3.67038	0.00212118	0.0383201	-1.36937
Q8NFW8	CMAS	PMA:AR02	0.503645	14.3795	3.67035	0.00212131	0.0383201	-1.36943
Q9BVL4	SELENOO	PMA:AR02	0.38494	12.3589	3.66909	0.00212689	0.0383201	-1.37192
P60660	MYL6	PMA:AR02	0.40205	19.1915	3.6679	0.00213223	0.0383201	-1.37429
O43808	SLC25A17	PMA:AR02	1.09547	11.0743	3.66471	0.00214652	0.0383201	-1.38061
P51665	PSMD7	PMA:AR02	0.357007	15.4387	3.66461	0.00214697	0.0383201	-1.3808
Q96GK7	FAHD2A	PMA:AR02	0.42534	13.0513	3.66381	0.00215056	0.0383201	-1.38238
P36405	ARL3	PMA:AR02	0.299696	14.4357	3.66318	0.00215341	0.0383201	-1.38363
P35613	BSG	PMA:AR02	-0.731538	14.8857	-3.66028	0.00216655	0.0383201	-1.38939
P49641	MAN2A2	PMA:AR02	-0.512905	13.8557	-3.65979	0.00216876	0.0383201	-1.39035
O43684	BUB3	PMA:AR02	0.336155	15.0574	3.65929	0.00217105	0.0383201	-1.39135
Q9NRN7	AASDHPPT	PMA:AR02	0.430678	12.4703	3.65126	0.00220786	0.0387142	-1.40725
P25787	PSMA2	PMA:AR02	0.976868	15.1047	3.65083	0.00220988	0.0387142	-1.40811
P02771	AFP	PMA:AR02	-1.397	13.2521	-3.64979	0.00221467	0.0387142	-1.41016
Q92604	LPGAT1	PMA:AR02	0.339514	14.2535	3.6476	0.00222489	0.0387685	-1.41451
Q93034	CUL5	PMA:AR02	0.337384	13.6238	3.6435	0.00224406	0.0389781	-1.42262
Q92552	MRPS27	PMA:AR02	0.43106	11.4642	3.63646	0.00227742	0.0394319	-1.43657
Q9BXS5	AP1M1	PMA:AR02	0.367657	16.1387	3.63333	0.00229238	0.0395654	-1.44276
Q96JB5	CDK5RAP3	PMA:AR02	-0.403875	12.4848	-3.62683	0.00232386	0.0396834	-1.45566
Q9NZD8	SPG21	PMA:AR02	0.314328	14.4682	3.62675	0.00232423	0.0396834	-1.45581
Q06481	APLP2	PMA:AR02	-0.642738	10.8652	-3.62555	0.00233008	0.0396834	-1.45818
Q9NQ11	ATP13A2	PMA:AR02	0.712735	11.2686	3.6247	0.00233423	0.0396834	-1.45986
P50416	CPT1A	PMA:AR02	0.347897	14.0723	3.62442	0.0023356	0.0396834	-1.46042
O75113	N4BP1	PMA:AR02	0.349051	12.8908	3.6167	0.00237368	0.0401016	-1.4757
P61020	RAB5B	PMA:AR02	0.294758	15.1878	3.61645	0.00237492	0.0401016	-1.4762
Q9UL42	PNMA2	PMA:AR02	-1.67113	12.7859	-3.61298	0.00239228	0.0402701	-1.48308
Q9H792	PEAK1	PMA:AR02	1.33925	12.5511	3.61046	0.00240496	0.0403589	-1.48807
P13637	ATP1A3	PMA:AR02	0.454018	14.9823	3.60248	0.00244552	0.0409138	-1.50388
P31146	CORO1A	PMA:AR02	-0.296376	19.842	-3.59209	0.00249933	0.0416861	-1.52444
Q9HAU4	SMURF2	PMA:AR02	0.421979	17.4675	3.58996	0.00251054	0.0417087	-1.52867
P25815	S100P	PMA:AR02	-2.12222	19.6274	-3.58892	0.00251598	0.0417087	-1.53071
Q5JTV8	TOR1AIP1	PMA:AR02	0.359861	16.5075	3.58628	0.00252997	0.0417292	-1.53595
Q6ICL3	TANGO2	PMA:AR02	0.915164	13.3092	3.58424	0.00254082	0.0417292	-1.53999
P62312	LSM6	PMA:AR02	-0.677051	14.4497	-3.58175	0.00255407	0.0417292	-1.54491
O95544	NADK	PMA:AR02	-0.448289	15.1745	-3.58168	0.00255449	0.0417292	-1.54506
Q9UBI9	HECA	PMA:AR02	0.532508	10.8189	3.58149	0.00255547	0.0417292	-1.54542
P42694	HELZ	PMA:AR02	1.22461	12.6899	3.57863	0.00257088	0.0417817	-1.5511
P0CG22		PMA:AR02	-0.708295	13.2446	-3.57804	0.00257401	0.0417817	-1.55225
Q9NZN8	CNOT2	PMA:AR02	0.631518	11.179	3.57188	0.00260746	0.0421991	-1.56444
P18077	RPL35A	PMA:AR02	-1.42827	13.9395	-3.56854	0.00262581	0.0423588	-1.57107
P11766	ADH5	PMA:AR02	-0.280916	16.1098	-3.56726	0.00263286	0.0423588	-1.5736
P41252	IARS1	PMA:AR02	0.256717	15.0861	3.56058	0.00266999	0.0426593	-1.58682
Q14444	CAPRIN1	PMA:AR02	-0.412639	13.0896	-3.56008	0.0026728	0.0426593	-1.58781
Q6PJG2	MIDEAS	PMA:AR02	0.416458	13.7074	3.55968	0.00267501	0.0426593	-1.5886
O15541	RNF113A	PMA:AR02	-0.679178	10.7181	-3.54611	0.00275217	0.0437619	-1.61544
O43464	HTRA2	PMA:AR02	0.497133	13.3568	3.54362	0.0027666	0.04383	-1.62038
Q86X55	CARM1	PMA:AR02	0.366619	12.9384	3.5426	0.00277253	0.04383	-1.6224
P43353	ALDH3B1	PMA:AR02	0.343624	16.7343	3.53954	0.00279038	0.0439848	-1.62846
O95825	CRYZL1	PMA:AR02	0.299091	12.9386	3.53635	0.00280907	0.0441518	-1.63476
P13725	OSM	PMA:AR02	1.41618	12.6336	3.53488	0.00281776	0.044161	-1.63767
Q9BYW2	SETD2	PMA:AR02	1.77055	12.2601	3.52378	0.00288404	0.0450157	-1.65961
P20337	RAB3B	PMA:AR02	-0.934419	17.5487	-3.52213	0.00289406	0.0450157	-1.66289
Q9GZT9	EGLN1	PMA:AR02	0.468848	12.275	3.52164	0.00289705	0.0450157	-1.66386
P28062	PSMB8	PMA:AR02	0.264927	15.3057	3.51594	0.00293187	0.0454274	-1.67513
P34949	MPI	PMA:AR02	0.349168	14.5171	3.50894	0.00297519	0.0459679	-1.68897
P05386	RPLP1	PMA:AR02	1.05404	14.8676	3.50666	0.00298943	0.0460575	-1.69348
Q8WTR2	DUSP19	PMA:AR02	1.09313	16.1014	3.50258	0.00301509	0.0463219	-1.70154
Q8N8E3	CEP112	PMA:AR02	0.997445	13.044	3.50118	0.00302398	0.046328	-1.70431
P49821	NDUFV1	PMA:AR02	-0.315927	13.7731	-3.49898	0.00303794	0.0464115	-1.70866
O00214	LGALS8	PMA:AR02	0.617753	13.5851	3.49748	0.00304749	0.0464274	-1.71162
Q16831	UPP1	PMA:AR02	-0.395948	13.0088	-3.49383	0.00307089	0.0465936	-1.71883
P08579	SNRPB2	PMA:AR02	0.66952	14.3853	3.49312	0.00307548	0.0465936	-1.72024
P52790	HK3	PMA:AR02	-0.937718	12.6188	-3.49146	0.00308619	0.0466263	-1.72352
A6NIH7	UNC119B	PMA:AR02	0.428347	14.8191	3.48778	0.00311007	0.0467592	-1.73079
P82979	SARNP	PMA:AR02	-0.587831	15.2173	-3.48656	0.00311806	0.0467592	-1.73321
Q96SB4	SRPK1	PMA:AR02	0.419583	13.7032	3.48615	0.00312071	0.0467592	-1.73401
Q13439	GOLGA4	PMA:AR02	-0.502276	12.8416	-3.48399	0.0031349	0.0468432	-1.73829
P32119	PRDX2	PMA:AR02	-0.384215	16.9638	-3.47815	0.00317348	0.0472901	-1.74982
P49023	PXN	PMA:AR02	0.398363	14.7549	3.47565	0.00319015	0.0473766	-1.75476
Q96D53	COQ8B	PMA:AR02	0.605735	11.1145	3.47404	0.00320092	0.0473766	-1.75794
Q96AH0	NABP1	PMA:AR02	0.533493	12.0454	3.47243	0.00321176	0.0473766	-1.76113
B5ME19	EIF3CL	PMA:AR02	0.33086	15.9778	3.47193	0.00321512	0.0473766	-1.76211
O15372	EIF3H	PMA:AR02	0.295539	14.1232	3.47039	0.00322554	0.0473766	-1.76516
P31751	AKT2	PMA:AR02	-0.532725	12.0445	-3.46943	0.00323201	0.0473766	-1.76705
P30838	ALDH3A1	PMA:AR02	0.62067	13.8726	3.46824	0.00324009	0.0473766	-1.7694
O15400	STX7	PMA:AR02	0.431545	15.9163	3.46652	0.00325176	0.04742	-1.77279
Q6AWC2	WWC2	PMA:AR02	2.36631	13.3718	3.46493	0.00326261	0.0474514	-1.77593
Q96CW1	AP2M1	PMA:AR02	0.23919	15.0676	3.46176	0.00328439	0.0474872	-1.7822
P30085	CMPK1	PMA:AR02	0.355837	16.0995	3.46088	0.00329046	0.0474872	-1.78394
P14174	MIF	PMA:AR02	0.38734	20.0964	3.46077	0.00329119	0.0474872	-1.78415
P08246	ELANE	PMA:AR02	0.862932	18.7516	3.45785	0.0033114	0.0476528	-1.78992
P50897	PPT1	PMA:AR02	0.968578	9.89519	3.45319	0.00334388	0.0479934	-1.79912
P48730	CSNK1D	PMA:AR02	0.295287	12.2445	3.45165	0.00335469	0.0480222	-1.80216
Q9BRR6	ADPGK	PMA:AR02	0.274909	15.1703	3.44987	0.0033672	0.0480663	-1.80567
Q9H8T0	AKTIP	PMA:AR02	0.431217	12.0698	3.44832	0.00337819	0.0480663	-1.80874
O75347	TBCA	PMA:AR02	-0.416924	16.7816	-3.44747	0.00338421	0.0480663	-1.81042
O95834	EML2	PMA:AR02	-0.419033	13.955	-3.44491	0.00340238	0.0481989	-1.81546
Q9Y2Q0	ATP8A1	PMA:AR02	0.290657	14.9982	3.44306	0.00341562	0.0482611	-1.81912
Q9UL25	RAB21	PMA:AR02	0.432203	17.0587	3.43917	0.00344353	0.0484135	-1.82679
Q7L5D6	GET4	PMA:AR02	0.498611	12.5318	3.43813	0.00345108	0.0484135	-1.82885
O00584	RNASET2	PMA:AR02	0.335766	15.7421	3.43786	0.00345303	0.0484135	-1.82939
Q13232	NME3	PMA:AR02	0.663762	12.1692	3.43433	0.00347867	0.0486479	-1.83635
Q9BS40	LXN	PMA:AR02	0.413858	14.8503	3.43199	0.00349573	0.0486769	-1.84096
Q9NQA3		PMA:AR02	0.537172	12.4188	3.43117	0.00350177	0.0486769	-1.84259
P51991	HNRNPA3	PMA:AR02	0.301367	15.8709	3.42584	0.00354106	0.0486769	-1.8531
Q15833	STXBP2	PMA:AR02	0.275742	16.4215	3.42388	0.00355568	0.0486769	-1.85698
Q9UI08	EVL	PMA:AR02	0.554773	12.9103	3.42387	0.00355572	0.0486769	-1.85699
Q5SWX8	ODR4	PMA:AR02	0.885262	10.5237	3.4222	0.00356822	0.0486769	-1.86029
Q9NZB2	FAM120A	PMA:AR02	0.259175	14.4209	3.42182	0.00357105	0.0486769	-1.86104
Q5VWQ0	RSBN1	PMA:AR02	0.586517	11.5372	3.42127	0.00357518	0.0486769	-1.86213
P21283	ATP6V1C1	PMA:AR02	-0.266174	14.7803	-3.41988	0.00358557	0.0486769	-1.86486
P13929	ENO3	PMA:AR02	0.867092	15.2839	3.41957	0.00358794	0.0486769	-1.86549
Q86V88	MDP1	PMA:AR02	0.435551	14.3913	3.4191	0.00359143	0.0486769	-1.8664
Q8WWN8	ARAP3	PMA:AR02	0.359512	12.2894	3.41796	0.00359999	0.0486769	-1.86864
O60832	DKC1	PMA:AR02	0.303998	14.9109	3.41615	0.00361367	0.0486769	-1.87221
P50749	RASSF2	PMA:AR02	0.376952	16.1815	3.41538	0.00361955	0.0486769	-1.87374
Q92820	GGH	PMA:AR02	0.303174	16.4857	3.41518	0.00362102	0.0486769	-1.87413
Q13496	MTM1	PMA:AR02	0.333831	12.4287	3.41485	0.00362355	0.0486769	-1.87478
P14868	DARS1	PMA:AR02	0.270267	16.3997	3.4127	0.0036399	0.0487765	-1.87903
Q8N0U8	VKORC1L1	PMA:AR02	-0.388299	13.8217	-3.41086	0.00365399	0.0488452	-1.88266
P27448	MARK3	PMA:AR02	0.323575	13.5238	3.40852	0.00367194	0.0489652	-1.88728
Q9NZC3	GDE1	PMA:AR02	0.464608	12.5183	3.39958	0.00374132	0.0496507	-1.9049
Q9H269	VPS16	PMA:AR02	0.275873	14.3134	3.39955	0.00374156	0.0496507	-1.90496
P26368	U2AF2	PMA:AR02	0.332645	16.5475	3.39487	0.00377837	0.0500088	-1.91417
Q9ULC5	ACSL5	PMA:AR02	0.562362	13.5765	3.39285	0.00379443	0.0500088	-1.91817
Q9H0R4	HDHD2	PMA:AR02	0.317569	15.0382	3.39265	0.00379605	0.0500088	-1.91857
Q8NCE2	MTMR14	PMA:AR02	0.416448	11.9878	3.38981	0.00381861	0.0501448	-1.92415
Q9H9H4	VPS37B	PMA:AR02	0.536167	13.8326	3.38812	0.00383221	0.0501448	-1.92749
Q96A33	CCDC47	PMA:AR02	0.548842	14.1202	3.38735	0.00383837	0.0501448	-1.929
Q9H2W6	MRPL46	PMA:AR02	0.541341	11.2039	3.38531	0.00385478	0.0501448	-1.93302
Q8TDQ7	GNPDA2	PMA:AR02	0.478365	12.638	3.38429	0.00386306	0.0501448	-1.93504
P50570	DNM2	PMA:AR02	0.318969	17.1564	3.38408	0.00386471	0.0501448	-1.93544
Q14696	MESD	PMA:AR02	0.570037	12.5627	3.38334	0.00387073	0.0501448	-1.9369
Q9UNP9	PPIE	PMA:AR02	0.79149	12.5719	3.38005	0.00389746	0.0503405	-1.94338
Q9NRW1	RAB6B	PMA:AR02	-1.16781	14.3043	-3.37922	0.00390429	0.0503405	-1.94503
Q16873	LTC4S	PMA:AR02	0.543061	14.636	3.37232	0.00396112	0.0508597	-1.95862
Q6ZWT7	MBOAT2	PMA:AR02	0.354642	13.9616	3.37206	0.00396322	0.0508597	-1.95912
Q86X52	CHSY1	PMA:AR02	0.579417	11.514	3.36792	0.00399772	0.0511249	-1.96728
Q9Y3T6	R3HCC1	PMA:AR02	0.381436	12.7602	3.36734	0.00400263	0.0511249	-1.96843
O15265	ATXN7	PMA:AR02	-0.716765	11.3942	-3.36398	0.00403087	0.0513653	-1.97504
Q14790	CASP8	PMA:AR02	0.342205	14.7523	3.36241	0.00404416	0.0514146	-1.97814
P36542	ATP5F1C	PMA:AR02	0.460613	16.5682	3.35939	0.00406975	0.0514238	-1.98407
Q92598	HSPH1	PMA:AR02	0.345974	17.698	3.35905	0.00407266	0.0514238	-1.98475
Q16563	SYPL1	PMA:AR02	-1.19436	14.5883	-3.35899	0.00407317	0.0514238	-1.98486
Q96HN2	AHCYL2	PMA:AR02	0.414849	14.096	3.356	0.00409874	0.0516271	-1.99075
Q9C0B7	TANGO6	PMA:AR02	0.86855	9.80157	3.34655	0.0041806	0.0525368	-2.00934
O14617	AP3D1	PMA:AR02	0.253521	14.6294	3.345	0.00419422	0.0525868	-2.0124
O00268	TAF4	PMA:AR02	0.527957	12.0843	3.34162	0.00422396	0.0526401	-2.01905
Q13557	CAMK2D	PMA:AR02	0.414691	15.1783	3.34139	0.00422603	0.0526401	-2.01951
P08236	GUSB	PMA:AR02	0.327517	15.6678	3.34002	0.00423821	0.0526401	-2.02221
Q9UQ16	DNM3	PMA:AR02	0.524714	12.6882	3.3388	0.00424901	0.0526401	-2.02461
Q9BSJ8	ESYT1	PMA:AR02	0.334467	15.2727	3.33592	0.00427471	0.0526401	-2.03027
O60262	GNG7	PMA:AR02	0.641842	11.9175	3.33591	0.00427481	0.0526401	-2.0303
Q01105	SET	PMA:AR02	-0.472742	11.2814	-3.33429	0.0042893	0.0526401	-2.03348
P31040	SDHA	PMA:AR02	0.384251	13.8428	3.33389	0.00429292	0.0526401	-2.03427
P29558	RBMS1	PMA:AR02	0.666948	11.7825	3.33375	0.00429416	0.0526401	-2.03454
Q9HBI0	PARVG	PMA:AR02	-0.421725	15.1232	-3.33366	0.00429499	0.0526401	-2.03472
Q14573	ITPR3	PMA:AR02	0.31492	16.0569	3.32889	0.004338	0.0529075	-2.04409
O00264	PGRMC1	PMA:AR02	-0.417404	13.8507	-3.32862	0.00434049	0.0529075	-2.04463
Q01518	CAP1	PMA:AR02	0.257901	20.1816	3.32721	0.00435331	0.0529075	-2.0474
Q96IU4	ABHD14B	PMA:AR02	0.626322	15.2748	3.32691	0.00435601	0.0529075	-2.04798
O43396	TXNL1	PMA:AR02	-0.413818	14.7153	-3.3259	0.0043653	0.0529075	-2.04999
P63165	SUMO1	PMA:AR02	-0.57907	14.9702	-3.31886	0.00443007	0.0535734	-2.06383
A6NMY6		PMA:AR02	-0.376125	14.2692	-3.31683	0.00444886	0.0536815	-2.0678
P68363	TUBA1B	PMA:AR02	0.433343	18.8432	3.31236	0.00449064	0.0539593	-2.07658
P45984	MAPK9	PMA:AR02	0.401229	12.8402	3.31226	0.00449167	0.0539593	-2.0768
Q9Y2T2	AP3M1	PMA:AR02	0.441229	13.4656	3.30443	0.00456579	0.0547293	-2.09218
P18084	ITGB5	PMA:AR02	0.410955	18.9562	3.30325	0.00457702	0.0547436	-2.09448
Q96NB2	SFXN2	PMA:AR02	0.424217	12.1274	3.29903	0.00461763	0.0551084	-2.10278
Q9Y6K0	CEPT1	PMA:AR02	0.388218	14.5562	3.29678	0.00463943	0.0552477	-2.1072
O00754	MAN2B1	PMA:AR02	0.370261	14.5441	3.29432	0.00466331	0.0554111	-2.11203
P11387	TOP1	PMA:AR02	-0.435902	14.3021	-3.28747	0.00473067	0.0557305	-2.12549
P06493	CDK1	PMA:AR02	0.798957	11.4923	3.28732	0.00473209	0.0557305	-2.12577
O43847	NRDC	PMA:AR02	0.316547	13.1724	3.28673	0.00473796	0.0557305	-2.12694
Q96KP1	EXOC2	PMA:AR02	0.489374	15.7869	3.28597	0.0047455	0.0557305	-2.12843
Q9H0U4	RAB1B	PMA:AR02	0.541647	15.4277	3.28577	0.00474747	0.0557305	-2.12882
Q8N9N7	LRRC57	PMA:AR02	0.305926	14.9474	3.28362	0.00476885	0.0557305	-2.13304
Q92530	PSMF1	PMA:AR02	0.349768	15.1197	3.28332	0.00477188	0.0557305	-2.13364
Q13636	RAB31	PMA:AR02	0.467058	17.2063	3.28331	0.00477194	0.0557305	-2.13365
Q3B726	POLR1F	PMA:AR02	0.691489	11.2635	3.2819	0.00478608	0.0557763	-2.13643
Q70EL1	USP54	PMA:AR02	1.09546	11.2129	3.28075	0.00479757	0.0557909	-2.13868
O15258	RER1	PMA:AR02	-0.630524	13.0649	-3.27784	0.00482684	0.0560119	-2.14439
Q9NZG7	NINJ2	PMA:AR02	1.04029	10.447	3.27206	0.00488553	0.0564735	-2.15573
O94915	FRYL	PMA:AR02	0.300552	17.7632	3.27188	0.00488733	0.0564735	-2.15608
P17612	PRKACA	PMA:AR02	-0.321243	15.4703	-3.26846	0.00492242	0.0567588	-2.16279
Q8NB90	SPATA5	PMA:AR02	0.233875	15.336	3.26735	0.00493383	0.0567703	-2.16496
Q9Y6G9	DYNC1LI1	PMA:AR02	0.282183	13.6142	3.26615	0.00494624	0.0567932	-2.16732
P08519		PMA:AR02	0.903613	10.5491	3.26081	0.0050017	0.057199	-2.17778
Q92556	ELMO1	PMA:AR02	0.262381	15.9871	3.25932	0.00501738	0.057199	-2.18072
Q6ZS81	WDFY4	PMA:AR02	0.256336	13.6904	3.2589	0.00502178	0.057199	-2.18154
Q92643	PIGK	PMA:AR02	0.369656	13.1304	3.25854	0.00502554	0.057199	-2.18225
Q9GZN8	ADISSP	PMA:AR02	0.411443	14.9124	3.25773	0.00503402	0.057199	-2.18383
P36222	CHI3L1	PMA:AR02	0.338657	16.5487	3.24815	0.00513582	0.0581587	-2.20261
Q9H0V9	LMAN2L	PMA:AR02	0.373904	14.4973	3.24778	0.0051398	0.0581587	-2.20334
Q9NVA1	UQCC1	PMA:AR02	0.625075	11.2135	3.24584	0.00516073	0.0581829	-2.20715
Q5JSP0	FGD3	PMA:AR02	0.287674	15.9027	3.24455	0.00517457	0.0581829	-2.20966
Q5TEU4	NDUFAF5	PMA:AR02	0.90522	11.822	3.24362	0.00518466	0.0581829	-2.21149
Q99487	PAFAH2	PMA:AR02	0.454508	11.6112	3.24234	0.00519858	0.0581829	-2.214
Q9NZ01	TECR	PMA:AR02	0.315195	14.1976	3.24221	0.00520001	0.0581829	-2.21426
Q99447	PCYT2	PMA:AR02	0.387567	13.0941	3.24151	0.00520753	0.0581829	-2.21562
P14317	HCLS1	PMA:AR02	-0.37771	16.6808	-3.24068	0.00521662	0.0581829	-2.21725
P26640	VARS1	PMA:AR02	0.217538	14.9164	3.23895	0.00523553	0.0581847	-2.22065
P29144	TPP2	PMA:AR02	0.224861	15.5596	3.23871	0.00523812	0.0581847	-2.22111
Q8TCU6	PREX1	PMA:AR02	0.329142	14.7813	3.23697	0.00525721	0.0582781	-2.22452
Q9Y3E1	HDGFL3	PMA:AR02	0.791586	10.7079	3.22727	0.0053648	0.0589793	-2.24352
Q9NZM1	MYOF	PMA:AR02	-0.593658	12.1625	-3.22687	0.00536923	0.0589793	-2.24429
P47897	QARS1	PMA:AR02	0.307496	14.6453	3.2268	0.00537003	0.0589793	-2.24443
Q9BVQ7	SPATA5L1	PMA:AR02	0.338003	12.0779	3.22592	0.00537991	0.0589793	-2.24615
P23468	PTPRD	PMA:AR02	0.678325	13.0692	3.22566	0.00538284	0.0589793	-2.24666
Q13573	SNW1	PMA:AR02	0.318894	13.2068	3.22452	0.00539569	0.0589793	-2.2489
P28039	AOAH	PMA:AR02	-0.667375	11.2615	-3.22448	0.00539616	0.0589793	-2.24898
Q9C0B1	FTO	PMA:AR02	0.421565	11.6112	3.22253	0.00541813	0.0590572	-2.25279
Q969H8	MYDGF	PMA:AR02	0.324752	15.7786	3.22193	0.00542495	0.0590572	-2.25397
O14548	COX7A2L	PMA:AR02	-0.864545	11.9655	-3.21716	0.00547927	0.0595298	-2.26331
Q9H1A3	METTL9	PMA:AR02	-0.836144	11.5471	-3.21578	0.00549499	0.0595335	-2.26599
O15111	CHUK	PMA:AR02	0.316216	13.1654	3.21522	0.00550145	0.0595335	-2.26709
P37287	PIGA	PMA:AR02	1.23773	10.4234	3.21089	0.00555137	0.0596337	-2.27556
Q9NZL9	MAT2B	PMA:AR02	0.266576	16.3079	3.21056	0.00555529	0.0596337	-2.27622
O14773	TPP1	PMA:AR02	0.402932	16.5792	3.20993	0.00556258	0.0596337	-2.27745
Q7Z6Z7	HUWE1	PMA:AR02	0.267292	14.7413	3.20938	0.00556899	0.0596337	-2.27853
Q14005	IL16	PMA:AR02	0.293854	16.9975	3.20906	0.00557268	0.0596337	-2.27915
Q92879	CELF1	PMA:AR02	-0.501901	13.0239	-3.20875	0.00557631	0.0596337	-2.27976
P40855	PEX19	PMA:AR02	0.545513	11.4223	3.20741	0.00559186	0.059683	-2.28237
Q16881	TXNRD1	PMA:AR02	0.317719	14.975	3.20531	0.00561647	0.0597343	-2.28648
Q9HB71	CACYBP	PMA:AR02	-0.302633	14.9114	-3.20513	0.00561857	0.0597343	-2.28683
Q00577	PURA	PMA:AR02	0.515859	12.502	3.2037	0.00563537	0.0597963	-2.28963
Q9UHD9	UBQLN2	PMA:AR02	0.388055	13.919	3.20143	0.00566208	0.0598417	-2.29406
O43865	AHCYL1	PMA:AR02	-0.521178	12.4505	-3.1977	0.00570634	0.0598417	-2.30135
Q9H7D0	DOCK5	PMA:AR02	0.207703	15.4101	3.19685	0.00571652	0.0598417	-2.30302
Q9H3H3	C11orf68	PMA:AR02	0.47793	14.0753	3.19659	0.00571955	0.0598417	-2.30352
Q13889	GTF2H3	PMA:AR02	1.17321	8.52931	3.19644	0.00572137	0.0598417	-2.30382
Q96BJ3	AIDA	PMA:AR02	-0.498761	11.6171	-3.19598	0.00572694	0.0598417	-2.30473
P10515	DLAT	PMA:AR02	0.235683	13.9071	3.19551	0.00573245	0.0598417	-2.30563
Q96FJ0	STAMBPL1	PMA:AR02	-0.781167	12.2214	-3.19522	0.00573596	0.0598417	-2.3062
Q5T1R4	HIVEP3	PMA:AR02	-2.53887	15.6597	-3.19502	0.0057384	0.0598417	-2.3066
Q13435	SF3B2	PMA:AR02	0.305119	15.2872	3.19147	0.00578102	0.0601658	-2.31353
Q14761	PTPRCAP	PMA:AR02	-0.902835	13.355	-3.19023	0.00579603	0.0601658	-2.31596
O00746	NME4	PMA:AR02	1.21978	10.8042	3.18933	0.00580684	0.0601658	-2.31771
Q16134	ETFDH	PMA:AR02	0.323469	12.5154	3.18878	0.0058136	0.0601658	-2.3188
O43504	LAMTOR5	PMA:AR02	0.309589	15.7834	3.18721	0.00583264	0.0602485	-2.32186
Q9NR19	ACSS2	PMA:AR02	0.328795	13.337	3.18584	0.00584931	0.0602971	-2.32453
P30153	PPP2R1A	PMA:AR02	0.312297	16.635	3.18501	0.00585946	0.0602971	-2.32615
P62851	RPS25	PMA:AR02	-0.671753	15.9381	-3.18331	0.0058803	0.0603977	-2.32948
Q9BUH6	PAXX	PMA:AR02	0.316112	14.613	3.18108	0.00590773	0.0604644	-2.33384
P23396	RPS3	PMA:AR02	0.233495	16.4478	3.18098	0.00590897	0.0604644	-2.33403
Q7Z4H8	POGLUT3	PMA:AR02	0.769911	12.5534	3.16687	0.00608541	0.0621532	-2.36158
Q9Y3D6	FIS1	PMA:AR02	0.466299	13.6401	3.16537	0.00610438	0.0622305	-2.36449
P67809	YBX1	PMA:AR02	-0.264067	14.4839	-3.16321	0.00613199	0.0623349	-2.36871
O43747	AP1G1	PMA:AR02	0.19311	16.0759	3.16236	0.00614289	0.0623349	-2.37037
P16435	POR	PMA:AR02	0.36245	14.9527	3.16189	0.00614891	0.0623349	-2.37129
O00757	FBP2	PMA:AR02	0.400075	14.4154	3.15783	0.0062012	0.0626293	-2.37922
Q8IUD2	ERC1	PMA:AR02	0.344061	15.1142	3.15783	0.00620122	0.0626293	-2.37922
A5YKK6	CNOT1	PMA:AR02	0.261027	14.19	3.15696	0.00621241	0.0626293	-2.38091
P48147	PREP	PMA:AR02	0.326091	14.0627	3.1519	0.00627832	0.063177	-2.39078
O75521	ECI2	PMA:AR02	0.555763	11.0866	3.14555	0.00636194	0.0637385	-2.40316
P78371	CCT2	PMA:AR02	0.26586	16.1274	3.14503	0.00636883	0.0637385	-2.40417
Q2PPJ7	RALGAPA2	PMA:AR02	0.290424	13.5336	3.145	0.00636918	0.0637385	-2.40422
O60684	KPNA6	PMA:AR02	0.359103	13.9377	3.14153	0.00641546	0.0640841	-2.41099
Q9HB90	RRAGC	PMA:AR02	0.343146	15.1168	3.14049	0.00642929	0.0641049	-2.41301
Q86XX4	FRAS1	PMA:AR02	-0.945395	13.2872	-3.13495	0.00650398	0.0647312	-2.42381
Q96P16	RPRD1A	PMA:AR02	1.0199	11.3215	3.13338	0.00652532	0.0647712	-2.42687
O15228	GNPAT	PMA:AR02	0.394882	12.6066	3.13253	0.00653686	0.0647712	-2.42852
Q99436	PSMB7	PMA:AR02	-0.59908	11.9368	-3.13203	0.00654363	0.0647712	-2.42949
O95671	ASMTL	PMA:AR02	0.263105	12.6768	3.12507	0.00663911	0.0655973	-2.44303
Q5BKY9	FAM133B	PMA:AR02	-0.792094	9.54506	-3.11822	0.00673457	0.0664202	-2.45638
Q5JS37	NHLRC3	PMA:AR02	-0.398633	12.8197	-3.11209	0.00682106	0.0670936	-2.4683
P10153	RNASE2	PMA:AR02	0.420313	19.4486	3.11076	0.00683998	0.0670936	-2.47089
O95573	ACSL3	PMA:AR02	0.31027	13.064	3.11035	0.00684572	0.0670936	-2.47167
Q6P2E9	EDC4	PMA:AR02	0.206785	15.6614	3.1082	0.00687655	0.0670936	-2.47587
Q16739	UGCG	PMA:AR02	0.638121	11.4223	3.10806	0.00687848	0.0670936	-2.47613
P06733	ENO1	PMA:AR02	0.357757	19.6454	3.10748	0.00688676	0.0670936	-2.47726
Q7Z4W1	DCXR	PMA:AR02	0.250209	14.9291	3.10733	0.00688897	0.0670936	-2.47756
Q9NPA8	ENY2	PMA:AR02	-0.641037	12.3762	-3.10643	0.00690191	0.0670998	-2.47931
Q96JH7	VCPIP1	PMA:AR02	0.348983	13.7309	3.09832	0.00701929	0.0681195	-2.49506
Q9BZJ0	CRNKL1	PMA:AR02	0.348929	13.1528	3.09623	0.00704995	0.0681562	-2.49914
Q96S44	TP53RK	PMA:AR02	0.470534	13.1972	3.09591	0.00705462	0.0681562	-2.49975
Q9NQC3	RTN4	PMA:AR02	0.453449	18.0352	3.0955	0.00706056	0.0681562	-2.50054
Q12979	ABR	PMA:AR02	0.3298	13.803	3.08733	0.00718167	0.0691722	-2.51642
Q5H9R7	PPP6R3	PMA:AR02	0.301399	13.1393	3.08667	0.00719145	0.0691722	-2.51769
P00488	F13A1	PMA:AR02	0.24071	15.4659	3.08584	0.00720385	0.0691722	-2.5193
P04920	SLC4A2	PMA:AR02	0.285963	12.7038	3.08326	0.0072427	0.069423	-2.52432
Q9H1A7		PMA:AR02	0.477885	12.4909	3.07965	0.00729726	0.0696253	-2.53133
P42331	ARHGAP25	PMA:AR02	0.295841	15.3618	3.07864	0.00731252	0.0696253	-2.53328
Q99805	TM9SF2	PMA:AR02	0.328626	13.3719	3.07862	0.00731285	0.0696253	-2.53332
Q9Y5L0	TNPO3	PMA:AR02	0.286801	14.9172	3.07849	0.00731487	0.0696253	-2.53358
Q9HAJ7	SAP30L	PMA:AR02	0.852779	12.0739	3.07736	0.00733206	0.0696674	-2.53577
Q6XQN6	NAPRT	PMA:AR02	0.37582	16.0106	3.07523	0.00736454	0.0697694	-2.5399
P05107	ITGB2	PMA:AR02	0.314592	19.116	3.0744	0.00737729	0.0697694	-2.54151
Q8WYA6	CTNNBL1	PMA:AR02	0.36005	13.5596	3.07352	0.00739084	0.0697694	-2.54322
O15021	MAST4	PMA:AR02	0.391521	15.6823	3.07141	0.00742335	0.0697694	-2.54732
Q16629	SRSF7	PMA:AR02	-0.262237	15.9473	-3.07049	0.00743749	0.0697694	-2.54909
Q9H1A4	ANAPC1	PMA:AR02	0.469173	11.0189	3.07001	0.00744491	0.0697694	-2.55002
P62857	RPS28	PMA:AR02	-0.614109	12.0855	-3.06952	0.00745251	0.0697694	-2.55098
Q96BP3	PPWD1	PMA:AR02	0.33063	16.8566	3.0693	0.00745592	0.0697694	-2.5514
Q9Y678	COPG1	PMA:AR02	0.299848	15.3031	3.06832	0.00747112	0.0697694	-2.5533
O43719	HTATSF1	PMA:AR02	-0.873286	10.7797	-3.0668	0.00749478	0.0697694	-2.55625
Q14847	LASP1	PMA:AR02	-0.338319	16.4444	-3.06459	0.00752922	0.0697694	-2.56053
P55084	HADHB	PMA:AR02	0.275297	16.6329	3.06435	0.00753299	0.0697694	-2.561
P01876		PMA:AR02	0.665245	11.9507	3.06384	0.00754094	0.0697694	-2.56198
Q8IXI1	RHOT2	PMA:AR02	0.256869	15.1489	3.06381	0.00754149	0.0697694	-2.56205
Q9UL18	AGO1	PMA:AR02	0.313121	12.7331	3.06325	0.00755029	0.0697694	-2.56314
Q7Z4V5	HDGFL2	PMA:AR02	-0.988128	15.884	-3.06195	0.00757063	0.0697694	-2.56565
Q5VU43	PDE4DIP	PMA:AR02	0.655198	11.6828	3.0619	0.00757151	0.0697694	-2.56576
Q5JRA6	MIA3	PMA:AR02	0.281088	14.4911	3.0618	0.00757306	0.0697694	-2.56595
P07948	LYN	PMA:AR02	0.283492	16.2692	3.05928	0.00761275	0.0700167	-2.57082
Q9BV40	VAMP8	PMA:AR02	-0.392096	14.9265	-3.05801	0.00763292	0.0700808	-2.57329
Q16204	CCDC6	PMA:AR02	-0.729694	12.677	-3.05722	0.00764542	0.0700808	-2.57482
Q9HB58	SP110	PMA:AR02	0.480005	13.3095	3.05584	0.00766734	0.0701638	-2.57749
Q9H9Q2	COPS7B	PMA:AR02	0.339495	13.6386	3.05315	0.00771031	0.0703586	-2.5827
Q9H479	FN3K	PMA:AR02	0.535682	11.1438	3.05264	0.00771846	0.0703586	-2.58369
Q9NTJ5	SACM1L	PMA:AR02	0.243177	16.3693	3.05209	0.00772732	0.0703586	-2.58476
P84074	HPCA	PMA:AR02	-0.665286	12.1452	-3.05056	0.00775203	0.0704659	-2.58774
Q14558	PRPSAP1	PMA:AR02	0.472726	14.586	3.04096	0.00790807	0.0717647	-2.60632
Q8NFF5	FLAD1	PMA:AR02	0.296154	11.8779	3.03964	0.00792981	0.071812	-2.60888
Q9NP72	RAB18	PMA:AR02	0.284649	16.817	3.03904	0.00793961	0.071812	-2.61003
Q96KQ4	PPP1R13B	PMA:AR02	0.772354	14.6161	3.03673	0.00797779	0.0720378	-2.6145
Q9HBG6	IFT122	PMA:AR02	0.916728	13.5893	3.02579	0.00816102	0.0734573	-2.63566
Q5VYK3		PMA:AR02	0.246397	14.7124	3.02573	0.00816192	0.0734573	-2.63577
P61224	RAP1B	PMA:AR02	0.412222	19.188	3.02275	0.00821254	0.0737911	-2.64153
O43676	NDUFB3	PMA:AR02	0.355808	13.7098	3.02196	0.00822607	0.0737911	-2.64306
Q8WUM0	NUP133	PMA:AR02	0.398755	13.2187	3.02046	0.0082517	0.073847	-2.64596
Q92945	KHSRP	PMA:AR02	0.272417	15.5563	3.02001	0.00825939	0.073847	-2.64683
O75530	EED	PMA:AR02	0.303491	12.6236	3.01915	0.0082741	0.0738575	-2.64849
Q96AA3	RFT1	PMA:AR02	0.368085	14.0368	3.01389	0.00836488	0.0744291	-2.65865
Q9HBH5	RDH14	PMA:AR02	-0.497345	12.1258	-3.01386	0.00836543	0.0744291	-2.65871
P05161	ISG15	PMA:AR02	0.373487	12.8178	3.00715	0.0084827	0.0752671	-2.67168
Q9P0S9	TMEM14C	PMA:AR02	0.589339	11.9061	3.00689	0.00848721	0.0752671	-2.67217
Q8NBF2	NHLRC2	PMA:AR02	0.216238	13.6727	3.00074	0.00859606	0.0761086	-2.68404
Q75QN2	INTS8	PMA:AR02	-0.908772	11.882	-2.99991	0.00861083	0.0761124	-2.68563
P01893		PMA:AR02	-0.790353	12.5814	-2.99915	0.0086244	0.0761124	-2.6871
Q9Y2I7	PIKFYVE	PMA:AR02	0.29986	12.3447	2.99708	0.00866161	0.0763174	-2.69111
P21796	VDAC1	PMA:AR02	0.30911	15.2855	2.99487	0.00870126	0.076543	-2.69536
P52788	SMS	PMA:AR02	0.28995	14.1244	2.99256	0.0087431	0.0767094	-2.69982
Q9Y4P8	WIPI2	PMA:AR02	-0.406506	13.379	-2.99187	0.00875556	0.0767094	-2.70115
Q6YHU6	THADA	PMA:AR02	-0.628886	13.4337	-2.9915	0.00876237	0.0767094	-2.70187
Q9P2J5	LARS1	PMA:AR02	0.226292	14.1004	2.9904	0.00878221	0.0767599	-2.70398
Q8WV22	NSMCE1	PMA:AR02	0.788906	10.1563	2.98602	0.00886224	0.0772212	-2.71242
P39656	DDOST	PMA:AR02	0.340619	16.5441	2.98597	0.00886331	0.0772212	-2.71253
Q9H270	VPS11	PMA:AR02	0.25138	13.654	2.97882	0.00899538	0.0781284	-2.72629
Q9Y2S2	CRYL1	PMA:AR02	0.302616	12.8542	2.97879	0.00899608	0.0781284	-2.72637
P51178	PLCD1	PMA:AR02	0.262822	13.0266	2.97597	0.00904872	0.0783947	-2.73179
P13498	CYBA	PMA:AR02	-0.502273	17.9123	-2.97561	0.0090555	0.0783947	-2.73249
Q9P015	MRPL15	PMA:AR02	0.634882	10.5216	2.97011	0.00915906	0.0791657	-2.74307
Q53TN4	CYBRD1	PMA:AR02	-0.440185	14.6664	-2.96652	0.00922741	0.0796302	-2.74998
Q9Y376	CAB39	PMA:AR02	0.258637	15.9609	2.96494	0.00925762	0.0797647	-2.75302
Q9NSD9	FARSB	PMA:AR02	0.241316	15.047	2.96196	0.00931497	0.0800263	-2.75876
Q9UI12	ATP6V1H	PMA:AR02	0.269024	15.2415	2.96139	0.00932597	0.0800263	-2.75986
Q5QJ74	TBCEL	PMA:AR02	0.64318	11.3904	2.96098	0.00933381	0.0800263	-2.76064
Q8IYS1	PM20D2	PMA:AR02	0.687874	10.9998	2.96031	0.00934667	0.0800263	-2.76192
Q9NQ48	LZTFL1	PMA:AR02	0.381107	12.6376	2.95909	0.00937042	0.0800477	-2.76428
P08397	HMBS	PMA:AR02	0.451079	11.8785	2.95867	0.00937852	0.0800477	-2.76508
P15309	ACP3	PMA:AR02	0.553115	12.9823	2.95657	0.00941938	0.0801967	-2.76912
P11413	G6PD	PMA:AR02	0.262951	19.4463	2.956	0.00943051	0.0801967	-2.77022
P49748	ACADVL	PMA:AR02	0.257279	14.8163	2.95434	0.00946296	0.0801967	-2.77341
Q2TB90	HKDC1	PMA:AR02	-1.11952	15.2583	-2.95369	0.00947554	0.0801967	-2.77465
Q6ZTN6	ANKRD13D	PMA:AR02	0.304236	13.6198	2.95293	0.00949051	0.0801967	-2.77611
Q99570	PIK3R4	PMA:AR02	0.240037	13.1717	2.95267	0.00949572	0.0801967	-2.77662
P55327	TPD52	PMA:AR02	0.276366	13.1646	2.95205	0.00950776	0.0801967	-2.7778
O94910	ADGRL1	PMA:AR02	1.25508	11.3692	2.95176	0.00951362	0.0801967	-2.77837
Q12851	MAP4K2	PMA:AR02	0.330206	12.4647	2.95031	0.0095421	0.0802225	-2.78115
P61326	MAGOH	PMA:AR02	0.336424	15.1904	2.94952	0.00955776	0.0802225	-2.78268
O75348	ATP6V1G1	PMA:AR02	0.234976	16.6082	2.94936	0.00956081	0.0802225	-2.78297
Q9NSC2	SALL1	PMA:AR02	-0.62732	17.2214	-2.94656	0.00961641	0.0805633	-2.78836
P46531	NOTCH1	PMA:AR02	0.863409	11.039	2.94583	0.00963096	0.0805633	-2.78977
P25098	GRK2	PMA:AR02	0.234688	16.1609	2.94462	0.00965504	0.080641	-2.79209
Q9NR81	ARHGEF3	PMA:AR02	-0.687871	13.7751	-2.9434	0.00967935	0.0806604	-2.79442
P62979	RPS27A	PMA:AR02	0.62525	11.9299	2.94302	0.00968694	0.0806604	-2.79515
P40123	CAP2	PMA:AR02	-0.82528	18.6498	-2.9373	0.00980223	0.0810245	-2.80614
Q9H2U2	PPA2	PMA:AR02	0.266486	14.9136	2.93697	0.00980887	0.0810245	-2.80677
Q9BTE1	DCTN5	PMA:AR02	0.720688	11.9565	2.93667	0.00981489	0.0810245	-2.80734
O94979	SEC31A	PMA:AR02	0.289079	14.017	2.93575	0.00983367	0.0810245	-2.80912
O95340	PAPSS2	PMA:AR02	0.391364	12.4336	2.93487	0.00985147	0.0810245	-2.81079
Q5HYI8	RABL3	PMA:AR02	0.334934	12.7268	2.93363	0.0098768	0.0810245	-2.81318
O00189	AP4M1	PMA:AR02	0.596039	11.8872	2.93317	0.00988622	0.0810245	-2.81406
Q7Z6J0	SH3RF1	PMA:AR02	-0.674919	11.7517	-2.93254	0.00989906	0.0810245	-2.81527
P16219	ACADS	PMA:AR02	0.304763	13.7253	2.93198	0.00991052	0.0810245	-2.81634
Q8N884	CGAS	PMA:AR02	0.52458	12.2409	2.93194	0.00991129	0.0810245	-2.81642
Q16775	HAGH	PMA:AR02	0.356339	14.247	2.93163	0.00991771	0.0810245	-2.81702
Q9NUJ1	ABHD10	PMA:AR02	0.334572	13.6822	2.93084	0.00993387	0.0810245	-2.81853
Q9UFN0	NIPSNAP3A	PMA:AR02	0.258918	14.2519	2.93068	0.00993727	0.0810245	-2.81885
Q92797	SYMPK	PMA:AR02	0.257092	12.6893	2.93061	0.00993865	0.0810245	-2.81898
Q9Y3L5	RAP2C	PMA:AR02	-0.304479	15.7358	-2.92315	0.010093	0.0821598	-2.83328
Q9HCK5	AGO4	PMA:AR02	0.205269	14.2669	2.92084	0.0101412	0.0824293	-2.83771
Q9BYM8	RBCK1	PMA:AR02	0.260214	12.7434	2.91811	0.0101985	0.0826778	-2.84293
Q16537	PPP2R5E	PMA:AR02	0.383067	11.8681	2.91686	0.010225	0.0826778	-2.84534
Q9P265	DIP2B	PMA:AR02	0.217315	14.1873	2.91661	0.0102301	0.0826778	-2.84581
A2A3N6		PMA:AR02	-1.01393	13.2724	-2.91599	0.0102434	0.0826778	-2.84701
O75438	NDUFB1	PMA:AR02	0.595077	10.06	2.91526	0.0102588	0.0826778	-2.8484
Q658Y4	FAM91A1	PMA:AR02	0.362423	11.3725	2.91449	0.010275	0.0826778	-2.84987
Q9UGI8	TES	PMA:AR02	0.281178	15.0389	2.91411	0.0102831	0.0826778	-2.8506
Q13615	MTMR3	PMA:AR02	0.259069	13.3005	2.91245	0.0103184	0.0826778	-2.85379
O94903	PLPBP	PMA:AR02	0.228945	14.9435	2.91241	0.0103194	0.0826778	-2.85387
O43741	PRKAB2	PMA:AR02	0.351984	12.1674	2.91222	0.0103234	0.0826778	-2.85423
Q9H3N1	TMX1	PMA:AR02	-0.364392	14.5535	-2.91092	0.0103511	0.0827595	-2.85672
Q8NCN5	PDPR	PMA:AR02	0.266151	13.4613	2.91032	0.0103639	0.0827595	-2.85787
O75330	HMMR	PMA:AR02	0.567849	11.746	2.90905	0.010391	0.0828545	-2.86029
Q9H1C4	UNC93B1	PMA:AR02	0.697047	11.7104	2.90822	0.0104088	0.0828756	-2.86188
O14727	APAF1	PMA:AR02	0.245464	15.3266	2.90606	0.0104554	0.0830067	-2.86602
Q00325	SLC25A3	PMA:AR02	0.209825	16.8095	2.90604	0.0104557	0.0830067	-2.86605
Q9H3K6	BOLA2	PMA:AR02	-0.436881	14.3516	-2.90504	0.0104775	0.0830585	-2.86798
Q08752	PPID	PMA:AR02	-0.326659	13.7191	-2.90325	0.0105163	0.0832448	-2.87141
P35573	AGL	PMA:AR02	0.236752	15.1468	2.89984	0.0105904	0.0837103	-2.87792
Q9UNN5	FAF1	PMA:AR02	0.38099	13.0216	2.89808	0.010629	0.0838181	-2.8813
Q63HN8	RNF213	PMA:AR02	0.211319	14.368	2.89781	0.0106348	0.0838181	-2.8818
Q86TP1	PRUNE1	PMA:AR02	0.306005	12.8882	2.8969	0.0106547	0.0838539	-2.88354
Q9UPN9	TRIM33	PMA:AR02	0.305109	11.8983	2.89441	0.0107097	0.0841654	-2.88831
Q8NFZ5	TNIP2	PMA:AR02	0.722317	10.9459	2.89012	0.0108049	0.0847912	-2.89652
Q7RTV0	PHF5A	PMA:AR02	0.301278	12.9069	2.88341	0.0109552	0.085847	-2.90932
Q96S55	WRNIP1	PMA:AR02	0.325531	14.9581	2.88101	0.0110095	0.0861492	-2.91391
Q13367	AP3B2	PMA:AR02	0.319895	13.5331	2.87876	0.0110607	0.0863394	-2.91821
Q9BUP3	HTATIP2	PMA:AR02	0.276295	14.687	2.87855	0.0110655	0.0863394	-2.91861
Q00535	CDK5	PMA:AR02	0.256576	13.8987	2.87583	0.0111278	0.0867014	-2.92381
P83436	COG7	PMA:AR02	0.395225	11.8275	2.87464	0.0111551	0.0867901	-2.92608
P21964	COMT	PMA:AR02	0.946389	13.8544	2.87383	0.0111735	0.0868097	-2.92761
Q6STE5	SMARCD3	PMA:AR02	0.840506	10.8741	2.86914	0.0112822	0.0875291	-2.93657
Q99877	H2BC15	PMA:AR02	1.13648	16.7093	2.86825	0.0113028	0.0875629	-2.93826
Q9UBS8	RNF14	PMA:AR02	0.539557	11.4086	2.86757	0.0113186	0.0875629	-2.93956
O43772	SLC25A20	PMA:AR02	-0.384494	14.0167	-2.86637	0.0113467	0.0876555	-2.94185
Q7Z422	SZRD1	PMA:AR02	-0.448449	11.5571	-2.86534	0.0113707	0.0877167	-2.94381
O15305	PMM2	PMA:AR02	0.291218	13.4642	2.86188	0.0114519	0.0882188	-2.95041
Q6PJT7	ZC3H14	PMA:AR02	0.279701	12.3295	2.85973	0.0115027	0.0884851	-2.9545
Q14011	CIRBP	PMA:AR02	-0.958391	12.5415	-2.85896	0.0115211	0.0885013	-2.95598
Q16795	NDUFA9	PMA:AR02	0.212127	14.0571	2.85449	0.0116274	0.0891924	-2.96448
P47914	RPL29	PMA:AR02	-0.567785	13.1213	-2.85253	0.0116744	0.089427	-2.96822
Q9H0D6	XRN2	PMA:AR02	0.254351	13.9169	2.84973	0.0117419	0.0898181	-2.97355
P17858	PFKL	PMA:AR02	0.21062	16.3936	2.84763	0.0117926	0.0898313	-2.97754
Q00610	CLTC	PMA:AR02	0.225777	17.3801	2.8475	0.011796	0.0898313	-2.97781
O00429	DNM1L	PMA:AR02	0.241799	15.1577	2.8474	0.0117982	0.0898313	-2.97798
Q5JPI9	EEF1AKMT2	PMA:AR02	0.462637	11.2936	2.84694	0.0118095	0.0898313	-2.97887
Q9NSV4	DIAPH3	PMA:AR02	1.09562	12.8774	2.84603	0.0118316	0.0898739	-2.9806
P11117	ACP2	PMA:AR02	0.283007	13.9173	2.84451	0.0118686	0.0900298	-2.98349
P05388	RPLP0	PMA:AR02	0.287699	15.5727	2.84167	0.0119381	0.0903735	-2.98889
Q9Y4P1	ATG4B	PMA:AR02	0.368729	13.5095	2.84119	0.0119498	0.0903735	-2.98979
Q9UNZ2	NSFL1C	PMA:AR02	0.273443	14.9487	2.83997	0.0119798	0.0903735	-2.99212
Q15404	RSU1	PMA:AR02	-0.223472	16.2257	-2.83996	0.0119802	0.0903735	-2.99215
Q15532	SS18	PMA:AR02	-0.998054	10.9829	-2.83907	0.0120021	0.0904136	-2.99384
O95479	H6PD	PMA:AR02	0.253882	15.0213	2.83693	0.0120551	0.0905727	-2.99791
O60506	SYNCRIP	PMA:AR02	0.220577	16.2857	2.83687	0.0120564	0.0905727	-2.99802
P0DMV8	HSPA1A	PMA:AR02	0.252368	19.573	2.83408	0.0121258	0.0909687	-3.00332
P23588	EIF4B	PMA:AR02	0.769894	12.2881	2.83314	0.0121491	0.0910177	-3.0051
Q9ULL0	KIAA1210	PMA:AR02	-0.725145	11.9972	-2.83248	0.0121657	0.0910177	-3.00636
P11216	PYGB	PMA:AR02	0.255703	14.3068	2.83116	0.0121988	0.0911403	-3.00888
P29350	PTPN6	PMA:AR02	0.239844	17.3201	2.83046	0.0122164	0.0911466	-3.01021
Q96T76	MMS19	PMA:AR02	0.250904	12.3119	2.82631	0.012321	0.0918013	-3.01809
Q15054	POLD3	PMA:AR02	0.475694	16.2363	2.8231	0.0124025	0.0922686	-3.02418
Q7Z3U7	MON2	PMA:AR02	0.245975	13.2639	2.82251	0.0124175	0.0922686	-3.0253
Q9BRR9	ARHGAP9	PMA:AR02	0.483139	15.9345	2.82183	0.0124349	0.0922717	-3.0266
Q13596	SNX1	PMA:AR02	0.372964	14.5661	2.81792	0.012535	0.0927118	-3.03401
Q9UNA1	ARHGAP26	PMA:AR02	0.328285	13.8337	2.81792	0.0125351	0.0927118	-3.03402
Q8NHP1	AKR7L	PMA:AR02	-0.575982	12.4087	-2.81741	0.0125483	0.0927118	-3.03499
O15530	PDPK1	PMA:AR02	0.427171	12.5578	2.81687	0.0125622	0.0927118	-3.03601
Q9UHN6	CEMIP2	PMA:AR02	0.215694	13.3947	2.81383	0.0126408	0.0927153	-3.04178
Q12906	ILF3	PMA:AR02	0.208171	16.0695	2.8133	0.0126545	0.0927153	-3.04278
P08240	SRPRA	PMA:AR02	0.279975	13.7985	2.81293	0.0126641	0.0927153	-3.04348
Q13158	FADD	PMA:AR02	0.458741	13.3428	2.81279	0.0126677	0.0927153	-3.04374
P56181	NDUFV3	PMA:AR02	1.00314	9.46615	2.81253	0.0126745	0.0927153	-3.04424
O75694	NUP155	PMA:AR02	0.286593	13.9016	2.81246	0.0126763	0.0927153	-3.04437
Q8NF91	SYNE1	PMA:AR02	0.255271	15.1505	2.81226	0.0126816	0.0927153	-3.04476
O95210	STBD1	PMA:AR02	0.340994	15.7516	2.8103	0.0127326	0.0927813	-3.04846
Q8IZP2		PMA:AR02	0.370247	15.308	2.80978	0.0127463	0.0927813	-3.04946
O60674	JAK2	PMA:AR02	0.436922	11.7009	2.80908	0.0127645	0.0927813	-3.05078
P60709	ACTB	PMA:AR02	0.326549	21.6367	2.80883	0.012771	0.0927813	-3.05124
P52566	ARHGDIB	PMA:AR02	-0.311154	18.2677	-2.80865	0.0127757	0.0927813	-3.05159
O95822	MLYCD	PMA:AR02	0.495698	11.2855	2.8076	0.0128035	0.0928592	-3.05359
Q16594	TAF9	PMA:AR02	0.396354	13.5878	2.80576	0.0128518	0.0930558	-3.05707
P53384	NUBP1	PMA:AR02	0.401133	14.2821	2.80527	0.0128647	0.0930558	-3.058
P47985	UQCRFS1	PMA:AR02	0.792101	13.2983	2.80046	0.0129923	0.093854	-3.06711
P08514	ITGA2B	PMA:AR02	0.403407	14.316	2.7981	0.0130553	0.094185	-3.07159
Q13423	NNT	PMA:AR02	0.224272	15.0976	2.79688	0.013088	0.0942955	-3.07389
P34896	SHMT1	PMA:AR02	0.247373	13.6614	2.79298	0.013193	0.0946751	-3.08127
P26639	TARS1	PMA:AR02	0.224533	14.996	2.79275	0.0131993	0.0946751	-3.08172
P62942	FKBP1A	PMA:AR02	-0.223178	15.963	-2.79263	0.0132024	0.0946751	-3.08193
Q13488	TCIRG1	PMA:AR02	0.243378	15.5807	2.79235	0.0132101	0.0946751	-3.08247
O00442	RTCA	PMA:AR02	0.24778	14.0348	2.79054	0.0132592	0.0948091	-3.08589
Q9BZZ5	API5	PMA:AR02	-0.214869	15.2275	-2.79038	0.0132635	0.0948091	-3.08619
Q86WN1	FCHSD1	PMA:AR02	0.591017	11.1261	2.78877	0.0133072	0.0949968	-3.08923
P42785	PRCP	PMA:AR02	0.299338	15.8558	2.78569	0.0133917	0.0954746	-3.09507
P59998	ARPC4	PMA:AR02	0.342026	19.3227	2.78369	0.0134466	0.0955419	-3.09885
P48643	CCT5	PMA:AR02	0.18727	15.7117	2.78316	0.013461	0.0955419	-3.09984
Q9Y2A7	NCKAP1	PMA:AR02	-0.887877	14.9625	-2.78301	0.0134654	0.0955419	-3.10014
Q6PHR2	ULK3	PMA:AR02	0.687721	11.442	2.7828	0.0134712	0.0955419	-3.10053
Q14692	BMS1	PMA:AR02	0.567451	9.71522	2.781	0.0135207	0.0955473	-3.10392
Q2PZI1	DPY19L1	PMA:AR02	0.398962	12.5903	2.78091	0.0135232	0.0955473	-3.10409
Q8N335	GPD1L	PMA:AR02	0.31068	12.9517	2.78087	0.0135245	0.0955473	-3.10418
Q96K76	USP47	PMA:AR02	0.195657	13.8815	2.77961	0.0135595	0.0955849	-3.10656
P51003	PAPOLA	PMA:AR02	0.291752	12.9923	2.77941	0.0135649	0.0955849	-3.10693
Q8N999	C12orf29	PMA:AR02	-0.446728	12.7498	-2.77536	0.013678	0.0962103	-3.11459
O95602	POLR1A	PMA:AR02	0.433921	14.8599	2.77443	0.013704	0.0962103	-3.11635
O94804	STK10	PMA:AR02	0.371895	15.3913	2.77434	0.0137065	0.0962103	-3.11651
Q9C0E2	XPO4	PMA:AR02	0.325924	12.3714	2.77102	0.0137999	0.0967415	-3.12278
Q06787	FMR1	PMA:AR02	-0.770445	12.1331	-2.76919	0.0138516	0.0967856	-3.12623
Q9UPM8	AP4E1	PMA:AR02	0.363213	11.0625	2.76801	0.0138852	0.0967856	-3.12846
Q8WU39	MZB1	PMA:AR02	0.555746	11.9593	2.76715	0.0139098	0.0967856	-3.13009
Q99685	MGLL	PMA:AR02	0.294304	15.2872	2.76655	0.0139267	0.0967856	-3.13121
P26196	DDX6	PMA:AR02	0.285834	16.0209	2.76625	0.0139353	0.0967856	-3.13178
Q9Y2E4	DIP2C	PMA:AR02	0.528431	13.002	2.76605	0.0139411	0.0967856	-3.13216
Q562R1	ACTBL2	PMA:AR02	0.909181	16.3387	2.76582	0.0139477	0.0967856	-3.1326
P50993	ATP1A2	PMA:AR02	0.451486	12.5184	2.7658	0.0139482	0.0967856	-3.13263
Q9UMR2	DDX19B	PMA:AR02	0.5059	12.4645	2.76441	0.013988	0.0969003	-3.13526
P18433	PTPRA	PMA:AR02	0.303785	12.0386	2.76304	0.0140271	0.0969003	-3.13783
O14964	HGS	PMA:AR02	0.311701	15.0356	2.76152	0.0140708	0.0969003	-3.1407
P61077	UBE2D3	PMA:AR02	0.929253	17.0983	2.76079	0.014092	0.0969003	-3.14209
P50336	PPOX	PMA:AR02	0.319761	13.3992	2.76042	0.0141026	0.0969003	-3.14278
Q8N1I0	DOCK4	PMA:AR02	-0.298275	15.9813	-2.75972	0.0141227	0.0969003	-3.14409
P25788	PSMA3	PMA:AR02	-0.413414	15.439	-2.75922	0.0141372	0.0969003	-3.14504
Q92688	ANP32B	PMA:AR02	0.310648	16.592	2.75921	0.0141374	0.0969003	-3.14506
Q9P2R3	ANKFY1	PMA:AR02	0.259358	14.7481	2.75916	0.014139	0.0969003	-3.14516
P26641	EEF1G	PMA:AR02	0.237107	16.2393	2.75904	0.0141424	0.0969003	-3.14538
P33121	ACSL1	PMA:AR02	0.296077	15.8889	2.75839	0.0141612	0.0969077	-3.14661
O75569	PRKRA	PMA:AR02	0.408693	12.0385	2.75625	0.0142234	0.0970994	-3.15064
Q9NPY3	CD93	PMA:AR02	0.656681	14.8726	2.7562	0.0142249	0.0970994	-3.15074
Q8NB37	GATD1	PMA:AR02	0.71032	13.8128	2.75406	0.0142871	0.0971054	-3.15477
Q15286	RAB35	PMA:AR02	0.361025	16.3241	2.75288	0.0143217	0.0971054	-3.157
P30405	PPIF	PMA:AR02	0.451555	13.4595	2.75223	0.0143408	0.0971054	-3.15822
Q9UJ70	NAGK	PMA:AR02	0.30744	17.5795	2.75149	0.0143623	0.0971054	-3.1596
Q6P474		PMA:AR02	-0.607814	12.0049	-2.7514	0.0143651	0.0971054	-3.15978
P46019	PHKA2	PMA:AR02	0.225642	14.4889	2.75119	0.0143712	0.0971054	-3.16017
Q14653	IRF3	PMA:AR02	0.240804	13.5064	2.75082	0.0143822	0.0971054	-3.16088
Q9NX58	LYAR	PMA:AR02	0.642781	12.8189	2.74972	0.0144145	0.0971054	-3.16294
O43681	GET3	PMA:AR02	0.236301	16.064	2.74943	0.0144229	0.0971054	-3.16348
Q68CZ6	HAUS3	PMA:AR02	0.657491	10.203	2.74868	0.0144452	0.0971054	-3.16491
P24539	ATP5PB	PMA:AR02	0.476947	15.3613	2.74727	0.0144867	0.0971054	-3.16755
Q53FA7	TP53I3	PMA:AR02	0.235909	14.9999	2.74578	0.0145311	0.0971054	-3.17037
O60673	REV3L	PMA:AR02	0.499398	13.5175	2.74528	0.014546	0.0971054	-3.17131
Q6UWV6	ENPP7	PMA:AR02	-0.369533	13.4962	-2.74524	0.0145469	0.0971054	-3.17137
P16083	NQO2	PMA:AR02	-0.434583	14.0932	-2.74491	0.0145569	0.0971054	-3.172
A0FGR8	ESYT2	PMA:AR02	0.237499	15.798	2.74438	0.0145725	0.0971054	-3.17299
O43318	MAP3K7	PMA:AR02	0.441805	12.5415	2.74421	0.0145777	0.0971054	-3.17332
Q14344	GNA13	PMA:AR02	0.242493	19.1471	2.74419	0.0145782	0.0971054	-3.17335
Q5JSZ5	PRRC2B	PMA:AR02	0.489245	12.6618	2.74408	0.0145815	0.0971054	-3.17356
O60568	PLOD3	PMA:AR02	0.306306	16.0309	2.74321	0.0146076	0.0971054	-3.1752
P48047	ATP5PO	PMA:AR02	0.218133	16.8332	2.7429	0.0146168	0.0971054	-3.17579
O15294	OGT	PMA:AR02	0.246065	12.5505	2.74278	0.0146204	0.0971054	-3.17601
P62995	TRA2B	PMA:AR02	-0.57766	16.1181	-2.74228	0.0146353	0.0971054	-3.17695
P49585	PCYT1A	PMA:AR02	-0.308226	13.3033	-2.74141	0.0146613	0.0971598	-3.17858
P10242	MYB	PMA:AR02	0.453071	12.3007	2.7341	0.0148818	0.0985019	-3.19233
Q92696	RABGGTA	PMA:AR02	0.18471	13.0936	2.73233	0.0149357	0.0986389	-3.19566
P14923	JUP	PMA:AR02	0.498627	13.8304	2.73223	0.0149387	0.0986389	-3.19585
O15127	SCAMP2	PMA:AR02	-0.674001	13.181	-2.73003	0.015006	0.0989404	-3.19998
Q9UBQ5	EIF3K	PMA:AR02	0.290431	14.1626	2.72912	0.0150339	0.0989404	-3.20169
P49588	AARS1	PMA:AR02	-0.221994	12.7513	-2.72896	0.0150388	0.0989404	-3.20199
O94826	TOMM70	PMA:AR02	0.282116	13.3775	2.72669	0.0151085	0.0992792	-3.20625
Q9NTX5	ECHDC1	PMA:AR02	0.283556	14.5266	2.72579	0.0151362	0.0993366	-3.20794
Q7L8L6	FASTKD5	PMA:AR02	0.722828	11.8747	2.72523	0.0151537	0.0993366	-3.209
Q9C0K0	BCL11B	PMA:AR02	0.526142	11.8516	2.7217	0.0152632	0.0999346	-3.21562
P83876	TXNL4A	PMA:AR02	0.63597	10.8113	2.72099	0.0152854	0.0999602	-3.21696
P54802	NAGLU	PMA:AR02	0.339202	11.6335	2.71833	0.0153684	0.100382	-3.22194
P07951	TPM2	PMA:AR02	-0.509288	14.5356	-2.71737	0.0153986	0.100459	-3.22375
P16455		PMA:AR02	0.670183	10.9397	2.71522	0.0154662	0.10078	-3.22778
Q9Y3D9	MRPS23	PMA:AR02	0.367668	12.4696	2.71439	0.0154924	0.10083	-3.22934
Q96F46	IL17RA	PMA:AR02	0.441743	11.7734	2.71308	0.0155337	0.100978	-3.23178
Q9Y5A7	NUB1	PMA:AR02	0.390403	12.8267	2.71089	0.0156032	0.101222	-3.23589
Q96PE7	MCEE	PMA:AR02	0.277228	12.5527	2.70945	0.0156491	0.101222	-3.23859
Q99996	AKAP9	PMA:AR02	0.746386	12.6653	2.70904	0.0156622	0.101222	-3.23936
Q14242	SELPLG	PMA:AR02	-0.430119	13.6128	-2.70838	0.0156834	0.101222	-3.2406
P54886	ALDH18A1	PMA:AR02	0.3328	11.8649	2.70816	0.0156902	0.101222	-3.24101
Q9Y5S1	TRPV2	PMA:AR02	0.365026	12.8879	2.70815	0.0156908	0.101222	-3.24104
Q9NP79	VTA1	PMA:AR02	0.278409	14.6157	2.70783	0.0157011	0.101222	-3.24164
Q9Y259	CHKB	PMA:AR02	0.434704	13.0721	2.70375	0.015832	0.101946	-3.24928
P62875	POLR2L	PMA:AR02	-0.648949	12.7615	-2.70314	0.0158518	0.101953	-3.25043
Q96JN0	LCOR	PMA:AR02	0.821052	12.4449	2.70038	0.0159411	0.102372	-3.25559
P98088	MUC5AC	PMA:AR02	0.815614	16.814	2.69996	0.0159545	0.102372	-3.25636
Q14088	RAB33A	PMA:AR02	0.277222	13.916	2.69867	0.0159968	0.102522	-3.25879
Q15046	KARS1	PMA:AR02	0.234488	15.267	2.697	0.0160511	0.102676	-3.26191
Q16637	SMN1	PMA:AR02	0.79403	11.2967	2.69678	0.0160585	0.102676	-3.26233
Q9BWU0	SLC4A1AP	PMA:AR02	0.301969	12.7663	2.69563	0.0160959	0.102795	-3.26447
P00450	CP	PMA:AR02	0.614448	11.2471	2.69403	0.0161485	0.103011	-3.26747
Q9Y3C8	UFC1	PMA:AR02	0.301481	15.2745	2.69263	0.0161945	0.103183	-3.27008
Q9UBL6	CPNE7	PMA:AR02	0.842946	10.5611	2.69164	0.0162273	0.103219	-3.27194
Q9UFP1	GASK1A	PMA:AR02	1.00166	11.5648	2.69105	0.0162467	0.103219	-3.27304
Q86UX7	FERMT3	PMA:AR02	0.320378	18.5458	2.69074	0.016257	0.103219	-3.27362
Q9NXN4	GDAP2	PMA:AR02	0.278548	13.7893	2.6891	0.0163114	0.103404	-3.27669
Q9Y616	IRAK3	PMA:AR02	0.408972	12.7727	2.68809	0.0163447	0.103404	-3.27857
O60313	OPA1	PMA:AR02	0.306921	13.2091	2.68787	0.0163523	0.103404	-3.27899
P55769	SNU13	PMA:AR02	-0.445652	14.851	-2.68758	0.0163619	0.103404	-3.27953
P84077	ARF1	PMA:AR02	-0.689869	15.152	-2.68597	0.0164154	0.103517	-3.28253
Q12882	DPYD	PMA:AR02	0.229028	13.5744	2.68518	0.0164421	0.103517	-3.28402
P01889	HLA-B	PMA:AR02	-0.525496	14.4318	-2.68453	0.0164638	0.103517	-3.28524
Q6ZMK1	ZFTRAF1	PMA:AR02	0.258857	15.2923	2.68433	0.0164704	0.103517	-3.2856
Q96C86	DCPS	PMA:AR02	0.290331	14.2452	2.68359	0.0164953	0.103517	-3.28699
P62834	RAP1A	PMA:AR02	0.641487	15.0469	2.68333	0.0165039	0.103517	-3.28747
Q9GZV4	EIF5A2	PMA:AR02	-0.490066	13.9061	-2.68307	0.0165126	0.103517	-3.28795
P24844	MYL9	PMA:AR02	-0.294594	13.8838	-2.68149	0.0165658	0.103731	-3.29091
P00746	CFD	PMA:AR02	0.319431	11.8012	2.67991	0.0166191	0.103945	-3.29385
Q9ULR3	PPM1H	PMA:AR02	0.415578	11.0703	2.67803	0.0166829	0.104063	-3.29737
P15144	ANPEP	PMA:AR02	0.27566	16.6556	2.67728	0.0167081	0.104063	-3.29876
P28907	CD38	PMA:AR02	0.546236	11.3543	2.67687	0.0167222	0.104063	-3.29954
Q6ZSR9		PMA:AR02	-0.297624	13.1461	-2.67661	0.0167311	0.104063	-3.30002
P51148	RAB5C	PMA:AR02	0.252463	14.8324	2.67613	0.0167472	0.104063	-3.3009
Q14164	IKBKE	PMA:AR02	-0.772635	11.8129	-2.67544	0.016771	0.104063	-3.30221
Q9UKA9	PTBP2	PMA:AR02	-0.903689	15.1485	-2.67542	0.0167715	0.104063	-3.30224
Q8NCA5	FAM98A	PMA:AR02	1.29145	12.6794	2.67468	0.0167969	0.10408	-3.30362
Q9BV86	NTMT1	PMA:AR02	0.796724	10.6874	2.67422	0.0168123	0.10408	-3.30447
Q14152	EIF3A	PMA:AR02	0.261152	15.4643	2.67123	0.0169149	0.104353	-3.31005
Q9P1Z2	CALCOCO1	PMA:AR02	0.520228	11.7147	2.67066	0.0169346	0.104353	-3.31112
Q9UBW5	BIN2	PMA:AR02	0.454157	14.7017	2.6705	0.0169402	0.104353	-3.31142
P60484	PTEN	PMA:AR02	-0.327916	12.9593	-2.67036	0.0169449	0.104353	-3.31168
Q8NDA8	MROH1	PMA:AR02	0.238988	13.1746	2.67015	0.0169522	0.104353	-3.31207
P31323	PRKAR2B	PMA:AR02	0.354047	13.5379	2.66898	0.0169925	0.104484	-3.31425
Q86Y82	STX12	PMA:AR02	0.290701	13.6912	2.666	0.0170957	0.104868	-3.31981
Q04759	PRKCQ	PMA:AR02	-0.572942	16.2532	-2.66584	0.0171012	0.104868	-3.3201
P06396	GSN	PMA:AR02	0.222025	19.803	2.66551	0.0171126	0.104868	-3.32072
Q9NUU6	OTULINL	PMA:AR02	0.399582	14.6461	2.66248	0.0172184	0.105198	-3.32637
P49459	UBE2A	PMA:AR02	-0.363624	12.563	-2.66181	0.0172416	0.105198	-3.32761
Q9UKA4	AKAP11	PMA:AR02	0.288497	14.1605	2.66145	0.0172544	0.105198	-3.32829
P24928	POLR2A	PMA:AR02	0.284487	13.2311	2.66139	0.0172565	0.105198	-3.3284
P11233	RALA	PMA:AR02	-0.346368	16.7408	-2.6612	0.017263	0.105198	-3.32875
Q04206	RELA	PMA:AR02	0.289907	13.2154	2.65885	0.0173458	0.105585	-3.33313
P43378	PTPN9	PMA:AR02	0.298954	12.7403	2.65724	0.0174023	0.105802	-3.33612
P51692	STAT5B	PMA:AR02	0.220857	15.7325	2.65662	0.0174243	0.105802	-3.33728
Q9H0I9	TKTL2	PMA:AR02	0.365435	15.5719	2.65562	0.0174598	0.105802	-3.33914
Q9NVJ2	ARL8B	PMA:AR02	0.335146	17.6548	2.65538	0.0174682	0.105802	-3.33958
P52758	RIDA	PMA:AR02	0.622287	10.8535	2.65509	0.0174784	0.105802	-3.34012
Q96I24	FUBP3	PMA:AR02	-0.274573	12.9395	-2.65273	0.0175623	0.106192	-3.34451
Q9BTV4	TMEM43	PMA:AR02	0.418739	15.1757	2.65174	0.0175979	0.106235	-3.34637
Q9NZI8	IGF2BP1	PMA:AR02	0.454988	11.4107	2.65144	0.0176085	0.106235	-3.34692
Q86WX3	RPS19BP1	PMA:AR02	0.62198	12.4805	2.64894	0.0176979	0.106623	-3.35156
P03928	ATP8	PMA:AR02	0.35937	12.4448	2.64855	0.0177119	0.106623	-3.35228
Q96M96	FGD4	PMA:AR02	0.381015	17.2747	2.64725	0.0177587	0.106787	-3.3547
A8K855	EFCAB7	PMA:AR02	0.945633	10.3899	2.64569	0.0178149	0.107007	-3.3576
P17050	NAGA	PMA:AR02	0.307829	13.7447	2.64457	0.0178558	0.107135	-3.3597
Q8IYB5	SMAP1	PMA:AR02	-0.768228	11.199	-2.64363	0.0178898	0.107221	-3.36145
O15254	ACOX3	PMA:AR02	0.394969	15.0296	2.6402	0.0180147	0.107851	-3.36782
P14678	SNRPB	PMA:AR02	0.243917	17.4479	2.63933	0.0180462	0.107921	-3.36942
P54577	YARS1	PMA:AR02	0.203588	14.541	2.63823	0.0180867	0.108045	-3.37148
P41236	PPP1R2	PMA:AR02	-0.31755	13.1032	-2.63719	0.0181248	0.108154	-3.37341
P50613	CDK7	PMA:AR02	0.403079	10.9989	2.6347	0.0182163	0.108486	-3.37802
P61081	UBE2M	PMA:AR02	0.274734	14.4399	2.63455	0.0182221	0.108486	-3.37831
Q53GS7	GLE1	PMA:AR02	0.213198	12.9946	2.63406	0.0182402	0.108486	-3.37922
Q96QR8	PURB	PMA:AR02	0.810027	11.2193	2.62959	0.0184061	0.109264	-3.38751
Q6ZU80	CEP128	PMA:AR02	0.797789	10.8738	2.62861	0.0184426	0.109264	-3.38933
Q9H1Y0	ATG5	PMA:AR02	0.258142	12.8276	2.62839	0.0184506	0.109264	-3.38972
P10619	CTSA	PMA:AR02	-0.233249	14.3884	-2.62838	0.0184511	0.109264	-3.38975
Q96AT9	RPE	PMA:AR02	0.702917	12.4022	2.62663	0.0185165	0.109435	-3.39299
O15145	ARPC3	PMA:AR02	0.218548	17.9091	2.62654	0.01852	0.109435	-3.39316
A1L0T0	ILVBL	PMA:AR02	0.272164	12.287	2.62548	0.0185597	0.10955	-3.39512
Q9BSH4	TACO1	PMA:AR02	0.575573	10.6148	2.62367	0.018628	0.109835	-3.39848
P50579	METAP2	PMA:AR02	0.301066	13.0226	2.62178	0.0186992	0.110135	-3.40198
Q96EE4	CCDC126	PMA:AR02	-0.719696	10.0153	-2.61905	0.018803	0.110547	-3.40705
P28331	NDUFS1	PMA:AR02	0.224014	14.0794	2.61888	0.0188096	0.110547	-3.40736
P78318	IGBP1	PMA:AR02	0.345917	13.4125	2.61672	0.0188916	0.110909	-3.41134
P62266	RPS23	PMA:AR02	-0.527426	13.7997	-2.61588	0.0189237	0.110978	-3.4129
P11532	DMD	PMA:AR02	-0.774847	11.7801	-2.61487	0.0189624	0.111086	-3.41477
P15170	GSPT1	PMA:AR02	0.420054	14.3329	2.61366	0.019009	0.11124	-3.41702
Q13310	PABPC4	PMA:AR02	0.235968	13.0595	2.61052	0.0191301	0.111828	-3.42282
Q5T013	HYI	PMA:AR02	0.490355	11.8193	2.60962	0.0191651	0.111872	-3.4245
O94819	KBTBD11	PMA:AR02	0.315604	14.4874	2.60927	0.0191787	0.111872	-3.42515
O60488	ACSL4	PMA:AR02	0.290201	13.907	2.60681	0.0192742	0.112166	-3.42969
P29374	ARID4A	PMA:AR02	0.575533	11.7164	2.60665	0.0192802	0.112166	-3.42998
Q6P5R6	RPL22L1	PMA:AR02	-0.735548	17.9258	-2.60604	0.0193043	0.112166	-3.43112
P42858	HTT	PMA:AR02	0.213482	12.8857	2.60586	0.0193113	0.112166	-3.43145
Q9NRZ7	AGPAT3	PMA:AR02	0.402683	11.0312	2.60287	0.0194283	0.112725	-3.43697
Q15555	MAPRE2	PMA:AR02	-0.579419	11.9074	-2.60157	0.0194793	0.112901	-3.43937
P63244	RACK1	PMA:AR02	0.261292	16.1035	2.6001	0.0195371	0.113116	-3.44208
P23443	RPS6KB1	PMA:AR02	-0.57884	10.856	-2.59896	0.0195824	0.113243	-3.4442
Q6ZNJ1	NBEAL2	PMA:AR02	0.245036	14.6286	2.59806	0.0196179	0.113243	-3.44585
P61586	RHOA	PMA:AR02	0.252421	17.6608	2.59797	0.0196214	0.113243	-3.44601
P30044	PRDX5	PMA:AR02	0.255284	20.1229	2.59432	0.0197668	0.113962	-3.45276
Q9HCK8	CHD8	PMA:AR02	0.427943	11.6518	2.59314	0.0198138	0.114112	-3.45493
P21281	ATP6V1B2	PMA:AR02	0.227975	17.0989	2.59218	0.0198525	0.114215	-3.45672
Q8N668	COMMD1	PMA:AR02	0.490125	12.2733	2.59051	0.0199195	0.114361	-3.4598
O00178	GTPBP1	PMA:AR02	0.249977	14.04	2.59019	0.019932	0.114361	-3.46037
O75792	RNASEH2A	PMA:AR02	-0.360989	13.7131	-2.58997	0.0199409	0.114361	-3.46078
Q659C4	LARP1B	PMA:AR02	0.516404	12.0064	2.58934	0.0199665	0.114388	-3.46195
Q9H300	PARL	PMA:AR02	0.601296	12.0144	2.58694	0.0200633	0.114822	-3.46637
Q9NTK5	OLA1	PMA:AR02	0.178817	15.4659	2.58509	0.0201382	0.11513	-3.46977
Q8NI60	COQ8A	PMA:AR02	0.297258	12.3418	2.5828	0.0202318	0.115544	-3.47401
O15321	TM9SF1	PMA:AR02	0.76611	10.6859	2.57976	0.0203562	0.116133	-3.47961
P06746	POLB	PMA:AR02	0.414282	11.6402	2.57871	0.0203995	0.116143	-3.48155
P40763	STAT3	PMA:AR02	0.235181	14.9656	2.57867	0.0204007	0.116143	-3.4816
O95352	ATG7	PMA:AR02	0.234376	16.2144	2.57744	0.0204518	0.116313	-3.48388
Q6P4F7	ARHGAP11A	PMA:AR02	0.552265	14.0371	2.57259	0.0206526	0.117274	-3.49281
Q6YP21	KYAT3	PMA:AR02	0.334866	12.7732	2.57232	0.0206639	0.117274	-3.4933
Q5VIR6	VPS53	PMA:AR02	0.246136	12.9625	2.57096	0.0207205	0.117354	-3.4958
Q9UNS2	COPS3	PMA:AR02	0.343398	13.018	2.57095	0.020721	0.117354	-3.49583
Q13630	GFUS	PMA:AR02	0.180973	15.0155	2.57031	0.0207477	0.117354	-3.497
P63220	RPS21	PMA:AR02	-0.301829	15.9939	-2.56992	0.020764	0.117354	-3.49772
O75427	LRCH4	PMA:AR02	0.254033	13.8839	2.56905	0.0208005	0.117439	-3.49932
Q5UCC4	EMC10	PMA:AR02	0.650701	11.5195	2.56835	0.0208297	0.117482	-3.5006
Q9P1U1	ACTR3B	PMA:AR02	-0.326416	16.9476	-2.56369	0.0210263	0.11845	-3.50917
P61769	B2M	PMA:AR02	0.434272	13.4098	2.56325	0.0210448	0.11845	-3.50998
Q6IBS0	TWF2	PMA:AR02	0.267317	15.9124	2.56145	0.0211211	0.118757	-3.51328
Q9UJA5	TRMT6	PMA:AR02	0.556384	10.8636	2.56	0.0211828	0.118785	-3.51594
P27708	CAD	PMA:AR02	0.165612	15.1317	2.55981	0.0211909	0.118785	-3.51628
Q9Y263	PLAA	PMA:AR02	0.271295	15.0459	2.5598	0.0211914	0.118785	-3.51631
Q58FG1		PMA:AR02	-0.380246	15.7532	-2.55872	0.0212374	0.118921	-3.51828
Q8NEZ4	KMT2C	PMA:AR02	0.254842	14.8933	2.55694	0.0213136	0.119225	-3.52155
P04181	OAT	PMA:AR02	0.287625	16.7502	2.55642	0.0213362	0.119229	-3.52252
Q6ZS11	RINL	PMA:AR02	0.389374	11.8068	2.55588	0.0213594	0.119237	-3.52351
Q14103	HNRNPD	PMA:AR02	0.303985	17.0144	2.55404	0.0214385	0.119556	-3.52688
P22695	UQCRC2	PMA:AR02	0.344888	14.2166	2.55252	0.0215041	0.119755	-3.52966
Q08043	ACTN3	PMA:AR02	-0.234716	17.8608	-2.55194	0.0215292	0.119755	-3.53073
Q6UXV4	APOOL	PMA:AR02	0.344329	12.3441	2.55144	0.0215511	0.119755	-3.53165
Q92973	TNPO1	PMA:AR02	0.204543	14.5918	2.55118	0.0215621	0.119755	-3.53212
O94973	AP2A2	PMA:AR02	0.241838	14.471	2.55029	0.0216008	0.119848	-3.53376
Q9Y315	DERA	PMA:AR02	0.275743	13.905	2.54932	0.0216428	0.119959	-3.53553
Q96ME1		PMA:AR02	-0.482884	11.9113	-2.54558	0.0218065	0.120744	-3.54239
P53621	COPA	PMA:AR02	0.161775	15.5622	2.54378	0.0218854	0.121058	-3.54569
Q13045	FLII	PMA:AR02	0.186382	15.8629	2.5423	0.0219505	0.121295	-3.54839
Q14141	SEPTIN6	PMA:AR02	0.644315	15.6015	2.54152	0.021985	0.121363	-3.54983
Q13561	DCTN2	PMA:AR02	0.217846	16.0479	2.54039	0.0220351	0.121434	-3.5519
Q8NBJ7	SUMF2	PMA:AR02	0.352194	12.1279	2.54022	0.0220424	0.121434	-3.5522
Q13094	LCP2	PMA:AR02	0.213525	15.5471	2.53968	0.0220667	0.121445	-3.5532
Q8IYD1	GSPT2	PMA:AR02	0.233515	13.358	2.53673	0.0221976	0.121883	-3.55859
O95789	ZMYM6	PMA:AR02	0.329087	15.577	2.53643	0.022211	0.121883	-3.55914
O95476	CTDNEP1	PMA:AR02	0.392195	12.5582	2.53638	0.0222133	0.121883	-3.55924
Q92636	NSMAF	PMA:AR02	0.43299	11.4704	2.53447	0.0222985	0.122227	-3.56272
Q9NX46	ADPRS	PMA:AR02	0.371012	13.489	2.53311	0.0223596	0.122262	-3.56521
Q01459	CTBS	PMA:AR02	0.580938	13.8608	2.53305	0.0223624	0.122262	-3.56533
Q7Z6I6	ARHGAP30	PMA:AR02	0.247758	14.8365	2.53246	0.0223887	0.122262	-3.5664
Q99571	P2RX4	PMA:AR02	0.419013	12.2349	2.53234	0.0223944	0.122262	-3.56663
P48454	PPP3CC	PMA:AR02	0.248121	14.9869	2.53034	0.0224843	0.122629	-3.57028
Q9BRT3	MIEN1	PMA:AR02	-0.515002	12.1817	-2.52705	0.0226332	0.123283	-3.57629
Q13107	USP4	PMA:AR02	0.201906	14.6225	2.52643	0.0226614	0.123283	-3.57742
Q92542	NCSTN	PMA:AR02	-0.27353	14.1204	-2.5262	0.0226719	0.123283	-3.57785
Q9NRD1	FBXO6	PMA:AR02	0.490115	11.3605	2.52546	0.0227056	0.123343	-3.5792
Q9NR31	SAR1A	PMA:AR02	0.233496	16.1197	2.51964	0.0229724	0.124668	-3.58983
Q9H9B4	SFXN1	PMA:AR02	0.233469	14.0745	2.51703	0.0230928	0.125127	-3.59459
O15269	SPTLC1	PMA:AR02	0.317999	12.8915	2.51669	0.0231088	0.125127	-3.59521
Q9Y3A6	TMED5	PMA:AR02	-0.451916	12.3263	-2.51586	0.0231473	0.125127	-3.59673
Q969V3	NCLN	PMA:AR02	0.261767	13.7102	2.51514	0.0231807	0.125127	-3.59804
O43665	RGS10	PMA:AR02	0.479076	12.2429	2.51484	0.0231946	0.125127	-3.59859
O95140	MFN2	PMA:AR02	0.38075	11.1298	2.51456	0.0232074	0.125127	-3.59909
Q96LD8	SENP8	PMA:AR02	0.673541	10.385	2.51424	0.0232223	0.125127	-3.59967
P11172	UMPS	PMA:AR02	0.277217	13.177	2.51233	0.0233112	0.125127	-3.60315
P21912	SDHB	PMA:AR02	0.348089	14.5043	2.51226	0.0233146	0.125127	-3.60328
Q9BSR8	YIPF4	PMA:AR02	0.545025	12.1662	2.51205	0.0233245	0.125127	-3.60367
Q9UHD2	TBK1	PMA:AR02	0.220162	13.1053	2.51191	0.0233309	0.125127	-3.60391
P53814	SMTN	PMA:AR02	0.566898	10.4649	2.51188	0.0233323	0.125127	-3.60397
Q5JUX0	SPIN3	PMA:AR02	0.874372	10.9167	2.50901	0.0234672	0.125661	-3.60921
Q8N4C8	MINK1	PMA:AR02	0.279396	13.0822	2.50878	0.0234779	0.125661	-3.60962
P49750	YLPM1	PMA:AR02	0.26	12.6443	2.50792	0.0235182	0.125753	-3.61119
P35249	RFC4	PMA:AR02	-0.338386	12.9092	-2.50632	0.0235938	0.125831	-3.61411
Q96RU3	FNBP1	PMA:AR02	-0.209231	13.9688	-2.50623	0.023598	0.125831	-3.61427
Q9Y2Q3	GSTK1	PMA:AR02	0.252763	14.6506	2.50615	0.0236021	0.125831	-3.61442
Q8TD16	BICD2	PMA:AR02	-0.235903	13.1402	-2.50517	0.0236483	0.125955	-3.6162
P18754	RCC1	PMA:AR02	0.220416	14.5724	2.503	0.0237511	0.126379	-3.62014
Q8NBU5	ATAD1	PMA:AR02	0.494968	11.4441	2.50082	0.0238552	0.12673	-3.62412
Q15435	PPP1R7	PMA:AR02	0.203425	15.8331	2.50064	0.0238635	0.12673	-3.62443
Q9UJX5	ANAPC4	PMA:AR02	0.314335	12.1718	2.4996	0.0239134	0.12681	-3.62633
Q92882	OSTF1	PMA:AR02	0.382216	16.8623	2.49916	0.0239344	0.12681	-3.62713
Q9UNY4	TTF2	PMA:AR02	0.801638	11.1191	2.49887	0.0239483	0.12681	-3.62766
P20585	MSH3	PMA:AR02	0.251894	15.0158	2.49398	0.0241838	0.127933	-3.63655
Q96IY1	NSL1	PMA:AR02	0.400041	11.7953	2.4915	0.0243042	0.128335	-3.64106
P53990	IST1	PMA:AR02	-0.32488	14.5789	-2.49144	0.024307	0.128335	-3.64117
O14841	OPLAH	PMA:AR02	0.246698	12.8613	2.48885	0.0244332	0.128841	-3.64587
Q9UHN1	POLG2	PMA:AR02	0.816037	10.8929	2.48851	0.02445	0.128841	-3.6465
P07099	EPHX1	PMA:AR02	-0.375304	14.3066	-2.48758	0.0244955	0.128904	-3.64818
Q969T4	UBE2E3	PMA:AR02	0.473845	12.9887	2.4873	0.0245092	0.128904	-3.64869
Q8IZQ1	WDFY3	PMA:AR02	0.192113	12.6989	2.48665	0.0245408	0.128946	-3.64986
O94886	TMEM63A	PMA:AR02	0.220579	15.5102	2.48607	0.0245692	0.128971	-3.65091
Q5T9L3	WLS	PMA:AR02	0.523135	12.0843	2.48533	0.0246058	0.129038	-3.65226
O75843	AP1G2	PMA:AR02	0.266065	14.6548	2.48133	0.0248034	0.129856	-3.65952
Q5J8M3	EMC4	PMA:AR02	0.440526	10.8772	2.48121	0.0248092	0.129856	-3.65974
O00410	IPO5	PMA:AR02	0.242086	15.0178	2.47997	0.0248708	0.129926	-3.66199
P26440	IVD	PMA:AR02	0.331545	13.0926	2.4795	0.0248943	0.129926	-3.66284
P42765	ACAA2	PMA:AR02	0.216241	15.2811	2.47949	0.0248947	0.129926	-3.66286
P42680	TEC	PMA:AR02	0.412511	11.7034	2.47875	0.0249311	0.129926	-3.66419
P10321	HLA-C	PMA:AR02	0.625079	16.9989	2.47799	0.024969	0.129926	-3.66556
P09913	IFIT2	PMA:AR02	-0.262126	13.7083	-2.47719	0.0250094	0.129926	-3.66703
P23458	JAK1	PMA:AR02	0.215589	16.3187	2.47708	0.0250147	0.129926	-3.66722
Q9H4L4	SENP3	PMA:AR02	0.566727	12.5316	2.47701	0.025018	0.129926	-3.66734
O95786	RIGI	PMA:AR02	0.289676	13.9459	2.47663	0.0250371	0.129926	-3.66804
P08631	HCK	PMA:AR02	0.310722	15.7223	2.4757	0.0250838	0.13003	-3.66972
Q6ZMD2	SPNS3	PMA:AR02	-0.799149	11.6162	-2.47528	0.0251047	0.13003	-3.67048
Q13136	PPFIA1	PMA:AR02	0.268666	13.0243	2.46669	0.0255389	0.132153	-3.68604
Q9Y6M4	CSNK1G3	PMA:AR02	0.410969	12.4736	2.46597	0.0255754	0.132196	-3.68733
O75436	VPS26A	PMA:AR02	0.190611	15.7281	2.46555	0.0255971	0.132196	-3.6881
Q5GLZ8	HERC4	PMA:AR02	0.211362	13.5165	2.4651	0.0256199	0.132196	-3.68891
Q9NVF7	FBXO28	PMA:AR02	1.01388	11.8573	2.46368	0.0256929	0.132405	-3.69149
P07947	YES1	PMA:AR02	-0.325562	14.4177	-2.46336	0.025709	0.132405	-3.69206
Q93052	LPP	PMA:AR02	0.345032	11.5009	2.4625	0.0257531	0.132507	-3.69361
Q96QH2	PRAM1	PMA:AR02	0.301324	15.8711	2.46115	0.0258225	0.132734	-3.69605
Q6ICG6	KIAA0930	PMA:AR02	0.424109	15.6148	2.4607	0.0258458	0.132734	-3.69687
Q9H3S1	SEMA4A	PMA:AR02	0.429701	10.9614	2.45784	0.0259937	0.133345	-3.70204
Q96JC1	VPS39	PMA:AR02	0.207748	14.0315	2.45745	0.0260138	0.133345	-3.70274
O00459	PIK3R2	PMA:AR02	0.241293	13.4823	2.45554	0.0261128	0.133345	-3.70618
P49589	CARS1	PMA:AR02	0.196185	15.0084	2.45521	0.02613	0.133345	-3.70678
P33527	ABCC1	PMA:AR02	0.286154	16.8862	2.45455	0.0261643	0.133345	-3.70797
P34059	GALNS	PMA:AR02	0.224124	15.5362	2.454	0.0261932	0.133345	-3.70897
Q00169	PITPNA	PMA:AR02	-0.223664	15.4748	-2.45366	0.0262111	0.133345	-3.70959
Q9Y336	SIGLEC9	PMA:AR02	1.02333	10.9721	2.45355	0.0262166	0.133345	-3.70978
Q9H936	SLC25A22	PMA:AR02	0.660238	10.6275	2.45317	0.0262366	0.133345	-3.71047
O95169	NDUFB8	PMA:AR02	0.398761	13.5442	2.45315	0.0262375	0.133345	-3.7105
Q8TF46	DIS3L	PMA:AR02	0.366046	13.4534	2.45292	0.0262497	0.133345	-3.71092
O75116	ROCK2	PMA:AR02	0.251249	15.8824	2.45273	0.0262594	0.133345	-3.71126
Q9H6Q3	SLA2	PMA:AR02	0.557027	9.83681	2.45229	0.0262826	0.133345	-3.71206
Q9UHW9	SLC12A6	PMA:AR02	0.290869	11.4157	2.45046	0.0263786	0.133623	-3.71536
Q9BX68	HINT2	PMA:AR02	0.382872	12.1505	2.45031	0.0263865	0.133623	-3.71563
Q86U42	PABPN1	PMA:AR02	-0.480022	12.1126	-2.44899	0.026456	0.13385	-3.71801
Q9GZM8	NDEL1	PMA:AR02	0.51479	11.8755	2.44812	0.0265015	0.133894	-3.71957
P55263	ADK	PMA:AR02	0.286898	15.1178	2.44789	0.0265136	0.133894	-3.71998
Q9Y2X8	UBE2D4	PMA:AR02	1.50685	12.698	2.44679	0.0265718	0.134064	-3.72197
A6NHR9	SMCHD1	PMA:AR02	0.159194	14.5091	2.44589	0.0266196	0.134135	-3.72359
Q8N3F8	MICALL1	PMA:AR02	0.434173	12.125	2.4456	0.0266351	0.134135	-3.72412
Q9BZI7	UPF3B	PMA:AR02	-0.379027	11.306	-2.4446	0.0266883	0.134149	-3.72593
Q9BY49	PECR	PMA:AR02	0.361245	12.6953	2.44419	0.0267099	0.134149	-3.72666
P10620	MGST1	PMA:AR02	0.320645	13.8764	2.44412	0.0267138	0.134149	-3.72679
Q92616	GCN1	PMA:AR02	0.179555	14.1292	2.44333	0.0267556	0.134149	-3.72821
O75251	NDUFS7	PMA:AR02	0.266166	13.2692	2.44323	0.0267608	0.134149	-3.72839
P12814	ACTN1	PMA:AR02	0.275983	19.9916	2.44205	0.0268239	0.134341	-3.73052
Q6JQN1	ACAD10	PMA:AR02	0.465772	11.6372	2.44086	0.0268872	0.134535	-3.73265
P0DOX7		PMA:AR02	0.576282	13.2451	2.43888	0.0269935	0.134909	-3.73623
Q15645	TRIP13	PMA:AR02	0.228559	12.8213	2.43849	0.0270144	0.134909	-3.73693
Q96PY6	NEK1	PMA:AR02	0.570614	12.4566	2.43809	0.0270362	0.134909	-3.73766
Q8TAT5	NEIL3	PMA:AR02	-0.833403	15.6973	-2.43671	0.0271105	0.134938	-3.74014
O43708	GSTZ1	PMA:AR02	0.224342	12.9958	2.43622	0.0271367	0.134938	-3.74101
Q8TAP6	CEP76	PMA:AR02	-0.700478	15.1403	-2.43617	0.0271397	0.134938	-3.74111
Q53FT3	HIKESHI	PMA:AR02	0.294561	12.8635	2.43577	0.0271612	0.134938	-3.74183
P46109	CRKL	PMA:AR02	0.227873	16.172	2.43542	0.0271798	0.134938	-3.74245
P26378	ELAVL4	PMA:AR02	-0.777303	13.8095	-2.43522	0.0271905	0.134938	-3.74281
O60762	DPM1	PMA:AR02	0.244349	13.3964	2.43458	0.0272254	0.134988	-3.74397
Q16851	UGP2	PMA:AR02	0.217252	18.3609	2.43383	0.0272661	0.135067	-3.74532
Q8NEZ2	VPS37A	PMA:AR02	0.307701	12.277	2.43318	0.0273013	0.135119	-3.74649
Q05086	UBE3A	PMA:AR02	0.350969	12.0024	2.43192	0.0273696	0.135215	-3.74875
P11940	PABPC1	PMA:AR02	0.167142	15.6464	2.43191	0.0273702	0.135215	-3.74877
P55957	BID	PMA:AR02	0.428976	17.4665	2.43014	0.0274667	0.135569	-3.75195
O43189	PHF1	PMA:AR02	0.59502	10.9351	2.42931	0.0275121	0.13567	-3.75345
P09486	SPARC	PMA:AR02	0.460253	12.2276	2.42834	0.0275652	0.135809	-3.75519
Q9HCC0	MCCC2	PMA:AR02	0.288986	12.5924	2.42434	0.0277847	0.136751	-3.76236
Q9Y2Y9	KLF13	PMA:AR02	0.598919	10.7221	2.42395	0.0278066	0.136751	-3.76307
Q8WWQ0	PHIP	PMA:AR02	0.254447	12.4542	2.42245	0.0278897	0.137036	-3.76577
P36959	GMPR	PMA:AR02	-0.512206	11.9981	-2.42151	0.0279413	0.137093	-3.76744
Q96FS4	SIPA1	PMA:AR02	0.207282	16.0236	2.42133	0.0279514	0.137093	-3.76777
O60826	CCDC22	PMA:AR02	0.232083	15.6845	2.4187	0.0280979	0.137687	-3.77249
P22314	UBA1	PMA:AR02	0.237757	17.0187	2.41796	0.0281393	0.137766	-3.77383
Q8WUA2	PPIL4	PMA:AR02	0.361248	11.7987	2.41749	0.0281655	0.137771	-3.77467
P29353	SHC1	PMA:AR02	0.286374	13.2029	2.41673	0.0282078	0.137774	-3.77602
Q9Y6D9	MAD1L1	PMA:AR02	0.29628	12.7441	2.41617	0.0282392	0.137774	-3.77703
Q9H992	MARCHF7	PMA:AR02	0.764501	12.2218	2.41581	0.0282594	0.137774	-3.77767
P01859		PMA:AR02	0.225259	15.8971	2.41527	0.0282895	0.137774	-3.77864
Q9P0S3	ORMDL1	PMA:AR02	-0.392097	13.3988	-2.41522	0.0282923	0.137774	-3.77873
Q96BW5	PTER	PMA:AR02	0.33127	13.0103	2.41291	0.0284223	0.138283	-3.78287
Q8TEW8	PARD3B	PMA:AR02	0.419985	11.8818	2.41182	0.0284843	0.13846	-3.78484
Q9Y2H6	FNDC3A	PMA:AR02	0.636766	10.2195	2.41137	0.0285094	0.13846	-3.78564
P26447	S100A4	PMA:AR02	0.283833	18.6265	2.40826	0.0286855	0.139126	-3.7912
Q9P2I0	CPSF2	PMA:AR02	-0.266539	12.2074	-2.40805	0.0286975	0.139126	-3.79158
P83111	LACTB	PMA:AR02	0.445163	12.8666	2.40701	0.0287571	0.139291	-3.79345
Q2TB10	ZNF800	PMA:AR02	0.383138	14.9748	2.40628	0.0287987	0.139369	-3.79476
Q9NTJ3	SMC4	PMA:AR02	0.418231	12.2672	2.40504	0.0288696	0.139588	-3.79697
Q8WUA7	TBC1D22A	PMA:AR02	0.215857	13.0463	2.4045	0.0289004	0.139613	-3.79794
Q9H993	ARMT1	PMA:AR02	0.292789	13.4178	2.40405	0.0289261	0.139613	-3.79874
Q9C0H2	TTYH3	PMA:AR02	-0.639921	11.2008	-2.40007	0.029155	0.140409	-3.80586
P09110	ACAA1	PMA:AR02	0.317652	16.1739	2.39943	0.0291923	0.140409	-3.80701
Q9UHR5	SAP30BP	PMA:AR02	-0.350598	11.6436	-2.39933	0.0291978	0.140409	-3.80718
P78417	GSTO1	PMA:AR02	0.218302	18.9787	2.39845	0.0292488	0.140409	-3.80876
O14646	CHD1	PMA:AR02	0.517074	12.2104	2.39844	0.0292494	0.140409	-3.80878
Q7Z7A4	PXK	PMA:AR02	0.304665	12.9223	2.39807	0.0292707	0.140409	-3.80943
Q9Y696	CLIC4	PMA:AR02	0.738072	11.5191	2.39806	0.0292712	0.140409	-3.80945
P23634	ATP2B4	PMA:AR02	0.255777	14.9097	2.3972	0.0293211	0.140488	-3.81098
O15357	INPPL1	PMA:AR02	0.18707	13.3529	2.39689	0.0293392	0.140488	-3.81154
P63104	YWHAZ	PMA:AR02	0.273318	19.3627	2.39588	0.0293979	0.140606	-3.81334
Q8TF68	ZNF384	PMA:AR02	0.462033	11.8736	2.39556	0.0294169	0.140606	-3.81393
P50151	GNG10	PMA:AR02	-0.600441	13.1596	-2.39514	0.0294411	0.140606	-3.81467
Q29RF7	PDS5A	PMA:AR02	0.183801	13.3503	2.39429	0.0294908	0.14072	-3.81619
P23497	SP100	PMA:AR02	0.407815	15.9066	2.39307	0.0295622	0.140937	-3.81838
Q9HAU0	PLEKHA5	PMA:AR02	-0.323392	13.5867	-2.39227	0.0296087	0.141035	-3.81979
Q9H9J2	MRPL44	PMA:AR02	0.595989	11.0976	2.39133	0.0296639	0.141148	-3.82147
P15954	COX7C	PMA:AR02	-0.40965	14.6064	-2.39099	0.0296841	0.141148	-3.82209
Q9H307	PNN	PMA:AR02	-0.373499	14.5552	-2.39034	0.0297219	0.141205	-3.82324
Q08211	DHX9	PMA:AR02	0.202942	17.8367	2.38933	0.0297818	0.141366	-3.82505
P00338	LDHA	PMA:AR02	0.243783	19.6906	2.38692	0.0299236	0.141916	-3.82934
Q8WVR3	TRAPPC14	PMA:AR02	0.46321	11.3732	2.38485	0.0300463	0.142149	-3.83303
Q8NDX1	PSD4	PMA:AR02	0.278177	14.0124	2.38464	0.0300592	0.142149	-3.83341
Q8TBC4	UBA3	PMA:AR02	0.34308	13.3628	2.38443	0.0300718	0.142149	-3.83379
P58107	EPPK1	PMA:AR02	0.312953	11.1066	2.38434	0.0300771	0.142149	-3.83395
O15050	TRANK1	PMA:AR02	0.260763	15.0084	2.38278	0.0301699	0.142379	-3.83673
P05023	ATP1A1	PMA:AR02	0.199888	15.0557	2.38265	0.0301778	0.142379	-3.83696
Q8WWY3	PRPF31	PMA:AR02	0.217665	13.9692	2.38095	0.0302793	0.142645	-3.83999
Q15056	EIF4H	PMA:AR02	-0.698021	12.6328	-2.38083	0.0302865	0.142645	-3.84021
P28066	PSMA5	PMA:AR02	0.261812	14.3407	2.37961	0.0303592	0.142724	-3.84237
P53611	RABGGTB	PMA:AR02	0.497956	10.7575	2.37921	0.0303834	0.142724	-3.84309
O14818	PSMA7	PMA:AR02	-0.283898	17.3545	-2.37903	0.0303942	0.142724	-3.8434
Q96CP6	GRAMD1A	PMA:AR02	0.254743	14.5441	2.37805	0.030453	0.142724	-3.84515
Q8WUK0	PTPMT1	PMA:AR02	0.701809	11.2772	2.37773	0.0304723	0.142724	-3.84572
Q9H0A0	NAT10	PMA:AR02	0.328421	11.3339	2.37772	0.0304727	0.142724	-3.84573
Q8N2F6	ARMC10	PMA:AR02	0.210388	16.2059	2.37745	0.0304891	0.142724	-3.84621
Q8N163	CCAR2	PMA:AR02	0.171649	14.4216	2.37706	0.0305128	0.142724	-3.84691
O75323	NIPSNAP2	PMA:AR02	0.365618	12.1641	2.37662	0.0305393	0.142726	-3.8477
Q9H2H8	PPIL3	PMA:AR02	0.271029	12.9124	2.37447	0.0306689	0.143209	-3.85151
P51659	HSD17B4	PMA:AR02	0.236504	14.7516	2.37325	0.0307432	0.143433	-3.85369
Q8IXJ9	ASXL1	PMA:AR02	0.920005	13.0128	2.37183	0.0308296	0.143627	-3.85622
P43246	MSH2	PMA:AR02	0.267603	12.4083	2.3717	0.0308373	0.143627	-3.85645
Q14204	DYNC1H1	PMA:AR02	0.162518	15.9453	2.36876	0.0310167	0.144268	-3.86167
P19388	POLR2E	PMA:AR02	0.29343	11.7897	2.36858	0.0310279	0.144268	-3.862
O14734	ACOT8	PMA:AR02	0.347172	14.6686	2.36626	0.0311701	0.144805	-3.86611
Q7L7V1	DHX32	PMA:AR02	-0.741644	13.2436	-2.36471	0.0312659	0.144915	-3.86888
O14983	ATP2A1	PMA:AR02	-0.348223	14.8345	-2.36471	0.031266	0.144915	-3.86888
Q9NSE4	IARS2	PMA:AR02	0.201525	13.3113	2.36428	0.031292	0.144915	-3.86963
P11142	HSPA8	PMA:AR02	0.219902	18.6298	2.36416	0.0312999	0.144915	-3.86986
P30876	POLR2B	PMA:AR02	0.151065	14.6899	2.36145	0.0314673	0.145566	-3.87466
Q6IAN0	DHRS7B	PMA:AR02	0.333025	11.5116	2.36048	0.0315276	0.1456	-3.87638
P35914	HMGCL	PMA:AR02	0.510568	11.7094	2.36047	0.031528	0.1456	-3.87639
Q9Y2L5	TRAPPC8	PMA:AR02	0.187899	14.8162	2.35848	0.0316523	0.14605	-3.87994
P57721	PCBP3	PMA:AR02	0.281731	16.7106	2.35781	0.031694	0.146119	-3.88112
A6NMX2	EIF4E1B	PMA:AR02	0.441316	11.361	2.35678	0.0317583	0.146204	-3.88294
O94888	UBXN7	PMA:AR02	0.220328	13.6659	2.35659	0.0317703	0.146204	-3.88328
Q14624	ITIH4	PMA:AR02	0.505304	13.9566	2.35595	0.0318107	0.146204	-3.88443
Q9H0H3	KLHL25	PMA:AR02	0.363238	13.013	2.3558	0.0318197	0.146204	-3.88468
Q10472	GALNT1	PMA:AR02	0.243036	13.0024	2.35501	0.0318696	0.146229	-3.88609
Q709C8	VPS13C	PMA:AR02	0.202663	13.1559	2.35457	0.0318967	0.146229	-3.88686
Q15018	ABRAXAS2	PMA:AR02	0.262644	13.2208	2.35444	0.0319055	0.146229	-3.8871
Q15437	SEC23B	PMA:AR02	0.22091	14.4117	2.35341	0.0319702	0.146288	-3.88893
O75503	CLN5	PMA:AR02	0.244556	14.3412	2.35338	0.0319721	0.146288	-3.88898
Q6P2P2	PRMT9	PMA:AR02	0.522915	10.26	2.35134	0.0321005	0.146718	-3.89259
Q96Q15	SMG1	PMA:AR02	0.275691	13.1253	2.35104	0.0321197	0.146718	-3.89312
Q9UPU5	USP24	PMA:AR02	0.198228	13.5381	2.3504	0.0321598	0.146778	-3.89425
Q9HBI1	PARVB	PMA:AR02	0.39579	14.0396	2.34937	0.0322251	0.146953	-3.89607
Q04727	TLE4	PMA:AR02	0.344346	13.7208	2.34818	0.0323009	0.147105	-3.89819
Q6Y288	B3GLCT	PMA:AR02	0.965036	10.0297	2.34779	0.0323257	0.147105	-3.89887
Q9NV70	EXOC1	PMA:AR02	0.23113	13.4963	2.34725	0.0323602	0.147105	-3.89983
P20592	MX2	PMA:AR02	0.198999	13.607	2.34677	0.0323909	0.147105	-3.90069
Q5T4S7	UBR4	PMA:AR02	0.1738	14.4403	2.34673	0.0323934	0.147105	-3.90075
P24390	KDELR1	PMA:AR02	0.855106	10.6619	2.34576	0.0324552	0.147263	-3.90247
Q9UIA0	CYTH4	PMA:AR02	0.18976	14.4662	2.34388	0.0325758	0.147688	-3.9058
Q6GMV2	SMYD5	PMA:AR02	0.410889	11.513	2.34333	0.0326105	0.147722	-3.90676
A6NEC2		PMA:AR02	0.38351	15.5139	2.34289	0.0326392	0.14773	-3.90755
Q9HAV7	GRPEL1	PMA:AR02	-0.577684	11.629	-2.34188	0.0327038	0.147899	-3.90933
O60307	MAST3	PMA:AR02	-0.290925	12.6253	-2.34028	0.0328071	0.148243	-3.91216
P02751	FN1	PMA:AR02	-0.758869	11.7918	-2.33901	0.0328888	0.14849	-3.9144
Q96SK2	TMEM209	PMA:AR02	0.772068	11.716	2.3369	0.0330259	0.14896	-3.91814
Q8N584	TTC39C	PMA:AR02	-0.238233	11.8884	-2.33656	0.0330477	0.14896	-3.91873
Q8N108	MIER1	PMA:AR02	-0.911385	12.697	-2.33499	0.0331501	0.149299	-3.92151
Q6PJW8	CNST	PMA:AR02	-0.447577	11.1009	-2.33179	0.0333594	0.1501	-3.92716
Q12962	TAF10	PMA:AR02	0.687976	9.33548	2.33143	0.033383	0.1501	-3.9278
Q9Y5Y2	NUBP2	PMA:AR02	0.485487	12.4422	2.3295	0.0335094	0.150473	-3.93119
Q7Z434	MAVS	PMA:AR02	0.290966	13.162	2.32906	0.0335386	0.150473	-3.93197
Q96J92	WNK4	PMA:AR02	0.353046	13.7385	2.3289	0.0335488	0.150473	-3.93225
P05165	PCCA	PMA:AR02	0.471555	10.7531	2.32779	0.0336223	0.150679	-3.93421
Q9NVX0	HAUS2	PMA:AR02	0.426347	11.5701	2.32632	0.0337192	0.150862	-3.9368
Q14186	TFDP1	PMA:AR02	0.859989	9.22016	2.32622	0.033726	0.150862	-3.93698
Q12996	CSTF3	PMA:AR02	0.286182	13.6189	2.32592	0.0337462	0.150862	-3.93752
P36969	GPX4	PMA:AR02	0.356052	14.933	2.32533	0.033785	0.150912	-3.93855
Q99728	BARD1	PMA:AR02	-0.564335	17.5268	-2.32461	0.0338328	0.151002	-3.93982
Q13595	TRA2A	PMA:AR02	0.354696	12.7722	2.32391	0.0338792	0.151085	-3.94105
P51606	RENBP	PMA:AR02	0.690799	11.2344	2.32292	0.0339453	0.151195	-3.9428
Q09328	MGAT5	PMA:AR02	0.566383	10.9656	2.32271	0.0339593	0.151195	-3.94317
Q9Y490	TLN1	PMA:AR02	0.211887	18.2835	2.32169	0.0340274	0.151265	-3.94496
Q9H0A8	COMMD4	PMA:AR02	-0.378367	13.8754	-2.3213	0.0340536	0.151265	-3.94565
Q9NVH6	TMLHE	PMA:AR02	0.456753	10.9179	2.32118	0.0340616	0.151265	-3.94587
Q15631	TSN	PMA:AR02	0.439092	15.6527	2.3206	0.0341001	0.151265	-3.94688
O43426	SYNJ1	PMA:AR02	0.174119	13.4011	2.31975	0.0341568	0.151265	-3.94837
P00395	COX1	PMA:AR02	-0.693413	11.607	-2.31951	0.034173	0.151265	-3.9488
O95782	AP2A1	PMA:AR02	0.163032	15.3207	2.31905	0.0342041	0.151265	-3.94961
Q5U3C3	TMEM164	PMA:AR02	0.499433	12.7303	2.31883	0.0342188	0.151265	-3.95
Q99747	NAPG	PMA:AR02	-0.238362	13.3599	-2.31874	0.0342246	0.151265	-3.95015
O60934	NBN	PMA:AR02	0.177601	14.8759	2.31789	0.0342821	0.151311	-3.95166
P07814	EPRS1	PMA:AR02	0.23027	14.5768	2.31776	0.0342906	0.151311	-3.95188
P23381	WARS1	PMA:AR02	0.211354	15.9659	2.31691	0.0343482	0.151443	-3.95338
Q5JSJ4	INTS6L	PMA:AR02	0.379321	11.0018	2.31399	0.0345451	0.152188	-3.95851
Q9NX14	NDUFB11	PMA:AR02	-0.779189	11.0498	-2.31023	0.0348007	0.153159	-3.96512
Q5HYK3	COQ5	PMA:AR02	0.607938	9.76338	2.30992	0.0348215	0.153159	-3.96566
Q9Y2L9	LRCH1	PMA:AR02	0.326929	12.7471	2.30674	0.0350398	0.153767	-3.97126
O00267	SUPT5H	PMA:AR02	0.238733	12.8323	2.30667	0.035044	0.153767	-3.97137
P49841	GSK3B	PMA:AR02	0.238166	12.7071	2.30667	0.0350445	0.153767	-3.97138
Q15024	EXOSC7	PMA:AR02	0.580883	10.0034	2.30603	0.0350882	0.153835	-3.9725
Q86VR2	RETREG3	PMA:AR02	0.46359	11.9481	2.30537	0.0351335	0.15391	-3.97366
Q9NUW8	TDP1	PMA:AR02	0.538516	11.2499	2.30389	0.0352355	0.154135	-3.97625
Q8IZ07	ANKRD13A	PMA:AR02	0.384053	13.3811	2.30381	0.0352413	0.154135	-3.9764
Q5T2N8	ATAD3C	PMA:AR02	0.734662	13.1459	2.29921	0.0355596	0.155241	-3.98446
Q3MHD2	LSM12	PMA:AR02	0.255139	13.0861	2.29902	0.0355727	0.155241	-3.98479
Q53GS9	USP39	PMA:AR02	0.386447	13.5114	2.29893	0.0355796	0.155241	-3.98496
Q9BSL1	UBAC1	PMA:AR02	-0.265969	14.1457	-2.29841	0.0356153	0.15527	-3.98586
P54819	AK2	PMA:AR02	-0.244047	16.7024	-2.29801	0.0356433	0.15527	-3.98656
Q9BSH5	HDHD3	PMA:AR02	0.50127	11.8496	2.29595	0.0357873	0.155773	-3.99018
O75419	CDC45	PMA:AR02	0.844073	13.3708	2.29504	0.0358509	0.155926	-3.99177
Q96EK7	FAM120B	PMA:AR02	0.211202	12.59	2.2941	0.0359168	0.156088	-3.99341
O95861	BPNT1	PMA:AR02	0.241023	13.7566	2.29343	0.0359644	0.156134	-3.9946
Q96T60	PNKP	PMA:AR02	0.238591	13.5825	2.29279	0.036009	0.156134	-3.99571
Q9Y3Z3	SAMHD1	PMA:AR02	0.263964	15.1603	2.29273	0.0360134	0.156134	-3.99582
P04075	ALDOA	PMA:AR02	0.238197	18.9435	2.29213	0.0360558	0.156194	-3.99687
Q96JJ7	TMX3	PMA:AR02	0.324317	13.5861	2.29105	0.0361321	0.156202	-3.99876
P62877	RBX1	PMA:AR02	-0.404982	13.5567	-2.291	0.0361355	0.156202	-3.99885
P17980	PSMC3	PMA:AR02	0.214057	15.1935	2.29089	0.0361434	0.156202	-3.99904
Q99832	CCT7	PMA:AR02	0.210672	15.5071	2.28945	0.0362448	0.156516	-4.00155
P10909	CLU	PMA:AR02	-0.456504	12.5935	-2.28802	0.0363467	0.156831	-4.00406
P00813	ADA	PMA:AR02	0.272828	13.8646	2.28628	0.0364706	0.15701	-4.00711
Q9NY12	GAR1	PMA:AR02	-0.221004	14.0227	-2.28623	0.0364739	0.15701	-4.00719
Q8NAV1	PRPF38A	PMA:AR02	-0.339185	13.4825	-2.28585	0.0365012	0.15701	-4.00786
Q8IXB1	DNAJC10	PMA:AR02	0.563876	15.5063	2.28582	0.0365032	0.15701	-4.00791
Q9BZD4	NUF2	PMA:AR02	-0.614633	14.2454	-2.2853	0.0365403	0.157046	-4.00882
O96005	CLPTM1	PMA:AR02	0.30069	11.9084	2.28411	0.0366254	0.157287	-4.0109
P42677	RPS27	PMA:AR02	-0.480372	13.9102	-2.28252	0.0367388	0.157577	-4.01366
Q5SW96	LDLRAP1	PMA:AR02	0.450223	10.2412	2.28213	0.0367671	0.157577	-4.01435
P83881	RPL36A	PMA:AR02	-0.368673	11.4637	-2.28191	0.036783	0.157577	-4.01474
Q8IX12	CCAR1	PMA:AR02	0.308401	12.5407	2.28155	0.0368084	0.157577	-4.01536
Q9NVD7	PARVA	PMA:AR02	-0.655056	11.678	-2.28061	0.0368766	0.157745	-4.01701
P08473	MME	PMA:AR02	0.346429	14.9877	2.28	0.0369202	0.157808	-4.01807
Q9UKX7	NUP50	PMA:AR02	0.208604	14.7528	2.27829	0.0370437	0.158212	-4.02106
Q96KG9	SCYL1	PMA:AR02	-0.254858	11.8279	-2.27758	0.0370948	0.158273	-4.02229
Q9BYI3	HYCC1	PMA:AR02	0.553359	11.0434	2.27729	0.0371161	0.158273	-4.0228
P35658	NUP214	PMA:AR02	0.246494	13.2646	2.27679	0.0371526	0.158305	-4.02368
P53804	TTC3	PMA:AR02	-0.461511	15.1108	-2.27595	0.0372132	0.158439	-4.02514
P22087	FBL	PMA:AR02	0.225647	14.7046	2.27544	0.0372502	0.158473	-4.02603
P55211	CASP9	PMA:AR02	0.302921	12.3874	2.27436	0.0373286	0.158582	-4.02791
O00116	AGPS	PMA:AR02	0.288938	13.733	2.27429	0.037334	0.158582	-4.02804
O75531	BANF1	PMA:AR02	0.252324	14.2262	2.2728	0.037443	0.158921	-4.03064
P13667	PDIA4	PMA:AR02	0.185559	15.9002	2.27181	0.0375152	0.159104	-4.03237
Q8TCD5	NT5C	PMA:AR02	0.574381	10.3393	2.26909	0.0377147	0.159826	-4.03711
Q14738	PPP2R5D	PMA:AR02	-0.247783	13.5586	-2.2677	0.0378167	0.160134	-4.03952
P23743	DGKA	PMA:AR02	0.214391	15.2232	2.26566	0.0379678	0.160649	-4.04308
O43149	ZZEF1	PMA:AR02	0.170239	15.1214	2.26477	0.0380333	0.160801	-4.04462
P18583	SON	PMA:AR02	-0.279329	13.868	-2.26386	0.0381009	0.160962	-4.04621
Q8IU68	TMC8	PMA:AR02	0.487464	12.8583	2.26212	0.0382299	0.161271	-4.04923
O75064	DENND4B	PMA:AR02	0.195824	13.5397	2.26208	0.0382332	0.161271	-4.04931
Q07666	KHDRBS1	PMA:AR02	0.344122	13.7753	2.26145	0.03828	0.161344	-4.0504
Q9H3G5	CPVL	PMA:AR02	0.399714	12.569	2.26077	0.0383309	0.161434	-4.05159
P52333	JAK3	PMA:AR02	0.363384	11.2912	2.26035	0.0383624	0.161442	-4.05232
Q8IZL8	PELP1	PMA:AR02	0.190976	12.5133	2.25835	0.0385114	0.161834	-4.05578
Q9Y4A5	TRRAP	PMA:AR02	0.196996	13.7697	2.25831	0.038515	0.161834	-4.05586
P40121	CAPG	PMA:AR02	-0.289446	18.5128	-2.25763	0.0385654	0.161921	-4.05703
P25789	PSMA4	PMA:AR02	-0.18478	16.3275	-2.25701	0.0386124	0.161994	-4.05812
Q6IA17	SIGIRR	PMA:AR02	0.348748	11.6865	2.25513	0.0387538	0.162462	-4.06138
P19623	SRM	PMA:AR02	0.199014	14.5379	2.25449	0.0388022	0.16254	-4.0625
Q96GW9	MARS2	PMA:AR02	0.395943	16.4509	2.25346	0.0388799	0.162741	-4.06428
P60468	SEC61B	PMA:AR02	-0.514467	11.3521	-2.251	0.0390668	0.163398	-4.06856
Q16644	MAPKAPK3	PMA:AR02	0.237553	14.4873	2.24926	0.039199	0.163825	-4.07158
Q8TEM1	NUP210	PMA:AR02	0.146384	14.1623	2.24809	0.0392883	0.163977	-4.07361
Q8TB72	PUM2	PMA:AR02	-0.354295	12.4503	-2.24774	0.0393149	0.163977	-4.07421
P24557	TBXAS1	PMA:AR02	0.154644	14.3825	2.2476	0.0393257	0.163977	-4.07445
O60502	OGA	PMA:AR02	0.216653	13.8517	2.24516	0.0395124	0.164524	-4.07868
P56556	NDUFA6	PMA:AR02	0.310411	12.4254	2.2451	0.0395171	0.164524	-4.07879
Q86SF2	GALNT7	PMA:AR02	0.32804	11.4931	2.24381	0.0396165	0.164621	-4.08103
Q3ZCQ8	TIMM50	PMA:AR02	0.35614	13.4053	2.24365	0.0396284	0.164621	-4.08129
P28799	GRN	PMA:AR02	0.471146	11.3081	2.24326	0.0396585	0.164621	-4.08197
O43765	SGTA	PMA:AR02	0.198071	14.0731	2.24323	0.0396612	0.164621	-4.08203
Q13442	PDAP1	PMA:AR02	-0.432368	13.6557	-2.24234	0.0397295	0.164779	-4.08357
Q8N3D4	EHBP1L1	PMA:AR02	0.282677	12.6184	2.24132	0.0398079	0.164979	-4.08532
Q92794	KAT6A	PMA:AR02	0.581124	10.175	2.24053	0.0398694	0.165108	-4.0867
P80303	NUCB2	PMA:AR02	0.293024	12.9319	2.23805	0.0400622	0.165781	-4.091
Q92734	TFG	PMA:AR02	0.197951	13.8897	2.2366	0.0401749	0.166121	-4.0935
P05362	ICAM1	PMA:AR02	0.335346	12.7456	2.23579	0.0402379	0.166256	-4.0949
Q8N0W3	FCSK	PMA:AR02	0.44447	11.0694	2.23531	0.0402757	0.166286	-4.09574
Q13619	CUL4A	PMA:AR02	0.36136	11.978	2.23388	0.0403877	0.166541	-4.09821
P49792	RANBP2	PMA:AR02	0.21712	13.444	2.23336	0.0404282	0.166541	-4.0991
P39880	CUX1	PMA:AR02	0.154343	14.9532	2.23282	0.0404707	0.166541	-4.10004
Q9UDW1	UQCR10	PMA:AR02	0.243263	15.2575	2.23266	0.0404833	0.166541	-4.10032
Q9HB40	SCPEP1	PMA:AR02	0.29229	13.3283	2.23257	0.0404902	0.166541	-4.10047
Q9NPQ8	RIC8A	PMA:AR02	0.198621	13.6657	2.231	0.0406136	0.166923	-4.10318
Q14554	PDIA5	PMA:AR02	0.269944	13.2915	2.23018	0.0406779	0.166971	-4.10459
Q9P2P1	NYNRIN	PMA:AR02	0.453755	13.1293	2.23008	0.0406864	0.166971	-4.10478
Q96KP4	CNDP2	PMA:AR02	0.174637	15.1414	2.22916	0.0407587	0.167141	-4.10636
Q03518	TAP1	PMA:AR02	0.222617	14.4546	2.22793	0.040856	0.167414	-4.10848
Q14156	EFR3A	PMA:AR02	0.214799	13.0148	2.22492	0.0410953	0.167924	-4.11368
Q9NRC8	SIRT7	PMA:AR02	0.746447	9.8744	2.22484	0.0411017	0.167924	-4.11382
Q7Z739	YTHDF3	PMA:AR02	0.329883	12.8518	2.22484	0.0411019	0.167924	-4.11382
Q15042	RAB3GAP1	PMA:AR02	0.282208	12.803	2.22471	0.041112	0.167924	-4.11404
O75533	SF3B1	PMA:AR02	0.203325	15.2463	2.22443	0.0411344	0.167924	-4.11453
Q9P2D3	HEATR5B	PMA:AR02	0.214257	14.8225	2.22218	0.041314	0.168488	-4.11841
Q9NUQ9	CYRIB	PMA:AR02	0.264827	18.135	2.22179	0.0413453	0.168488	-4.11908
Q8WXH0	SYNE2	PMA:AR02	0.16411	15.6994	2.22154	0.041365	0.168488	-4.1195
Q9BTT0	ANP32E	PMA:AR02	0.372267	17.0781	2.2209	0.041416	0.168569	-4.1206
Q92600	CNOT9	PMA:AR02	0.469591	11.156	2.21987	0.0414992	0.168782	-4.12239
P13716	ALAD	PMA:AR02	0.232849	15.7648	2.219	0.0415694	0.168855	-4.12389
Q9UBV2	SEL1L	PMA:AR02	0.380576	11.4307	2.21888	0.041579	0.168855	-4.1241
P31948	STIP1	PMA:AR02	-0.153066	16.7887	-2.21713	0.0417201	0.169302	-4.12711
Q99536	VAT1	PMA:AR02	0.205547	19.616	2.21495	0.0418965	0.169629	-4.13086
Q86X83	COMMD2	PMA:AR02	-0.442928	13.6291	-2.21473	0.041914	0.169629	-4.13124
P00505	GOT2	PMA:AR02	-0.269264	15.1661	-2.21443	0.0419382	0.169629	-4.13175
Q9Y2B0	CNPY2	PMA:AR02	-0.443237	14.2838	-2.21438	0.0419428	0.169629	-4.13185
Q5T1J5		PMA:AR02	0.519771	12.194	2.21421	0.0419562	0.169629	-4.13213
Q6P2Q9	PRPF8	PMA:AR02	0.163117	15.4899	2.21306	0.0420497	0.169881	-4.13411
P35813	PPM1A	PMA:AR02	0.225767	14.4173	2.21222	0.0421184	0.169887	-4.13556
Q32NB8	PGS1	PMA:AR02	0.522727	10.7944	2.21199	0.0421369	0.169887	-4.13595
P11908	PRPS2	PMA:AR02	0.229369	13.8283	2.21189	0.0421451	0.169887	-4.13613
Q9H5X1	CIAO2A	PMA:AR02	0.278532	12.8499	2.21151	0.0421758	0.169887	-4.13677
Q5T280	SPOUT1	PMA:AR02	0.720463	11.67	2.21086	0.0422289	0.169975	-4.13789
O94782	USP1	PMA:AR02	0.396555	15.4466	2.21019	0.0422834	0.170069	-4.13904
P20248	CCNA2	PMA:AR02	1.25103	13.1166	2.20972	0.0423219	0.170087	-4.13985
Q13315	ATM	PMA:AR02	0.155637	13.8131	2.20938	0.0423502	0.170087	-4.14044
P62891	RPL39	PMA:AR02	-0.502661	13.0605	-2.20768	0.0424892	0.17052	-4.14336
Q92615	LARP4B	PMA:AR02	0.364853	13.1175	2.20653	0.0425842	0.170628	-4.14534
Q6NXR4	TTI2	PMA:AR02	0.360297	12.1113	2.20629	0.0426036	0.170628	-4.14575
P55809	OXCT1	PMA:AR02	0.180844	13.3819	2.20621	0.0426102	0.170628	-4.14588
Q6PL24	TMED8	PMA:AR02	0.25098	13.4273	2.20467	0.0427377	0.17098	-4.14854
Q96SZ5	ADO	PMA:AR02	0.359998	12.2827	2.20439	0.0427606	0.17098	-4.14902
Q9BVK6	TMED9	PMA:AR02	0.256653	16.5958	2.19995	0.043129	0.172326	-4.15664
Q9H1Z4	WDR13	PMA:AR02	0.27618	12.0166	2.19953	0.0431638	0.172339	-4.15736
Q05048	CSTF1	PMA:AR02	0.237697	12.2038	2.1987	0.0432334	0.172491	-4.15879
Q15067	ACOX1	PMA:AR02	0.20466	14.3592	2.19737	0.0433442	0.172806	-4.16106
Q8N2G8	GHDC	PMA:AR02	0.363904	11.7685	2.19615	0.0434467	0.173025	-4.16316
P30740	SERPINB1	PMA:AR02	0.181856	20.0741	2.19578	0.0434777	0.173025	-4.16379
P02656	APOC3	PMA:AR02	0.685095	12.8612	2.19558	0.0434941	0.173025	-4.16413
Q9NX47	MARCHF5	PMA:AR02	0.424371	10.9537	2.19433	0.043599	0.173315	-4.16626
O43293	DAPK3	PMA:AR02	0.595318	10.131	2.19328	0.0436879	0.173542	-4.16807
P39748	FEN1	PMA:AR02	0.214133	15.9504	2.19281	0.043727	0.173571	-4.16887
Q9UKF7	PITPNC1	PMA:AR02	0.406487	11.8735	2.19152	0.0438365	0.173879	-4.17109
Q9BRP4	PAAF1	PMA:AR02	0.23439	13.0801	2.19068	0.0439068	0.174032	-4.17251
O00232	PSMD12	PMA:AR02	0.226804	15.3261	2.18969	0.0439914	0.174099	-4.17422
Q96JH8	RADIL	PMA:AR02	1.46232	15.2578	2.18934	0.044021	0.174099	-4.17482
Q68CP4	HGSNAT	PMA:AR02	0.396177	13.033	2.18917	0.0440348	0.174099	-4.17509
Q9NR46	SH3GLB2	PMA:AR02	0.205437	14.0353	2.18834	0.0441058	0.174099	-4.17652
Q96DE0	NUDT16	PMA:AR02	-0.228907	13.4527	-2.18815	0.0441222	0.174099	-4.17685
O14979	HNRNPDL	PMA:AR02	0.21312	16.6548	2.18803	0.0441326	0.174099	-4.17706
P57081	WDR4	PMA:AR02	0.481603	12.6406	2.18785	0.0441473	0.174099	-4.17736
Q8IV38	ANKMY2	PMA:AR02	0.36906	11.5474	2.18676	0.0442399	0.174339	-4.17922
Q92622	RUBCN	PMA:AR02	0.467329	9.63025	2.18543	0.0443543	0.174663	-4.18151
P16150	SPN	PMA:AR02	0.267151	14.4465	2.18408	0.0444691	0.174989	-4.1838
Q96JJ3	ELMO2	PMA:AR02	0.168617	15.9815	2.18312	0.0445517	0.175187	-4.18545
Q03938	ZNF90	PMA:AR02	0.468857	16.3946	2.1779	0.0450018	0.176622	-4.19436
P55854	SUMO3	PMA:AR02	0.276404	17.4515	2.17775	0.0450151	0.176622	-4.19462
Q9NZM3	ITSN2	PMA:AR02	0.208132	13.3055	2.17667	0.0451084	0.176622	-4.19646
Q9H330	TMEM245	PMA:AR02	0.580041	11.5988	2.17663	0.0451117	0.176622	-4.19652
Q14671	PUM1	PMA:AR02	0.559802	10.6352	2.17652	0.0451217	0.176622	-4.19672
Q9NXH8	TOR4A	PMA:AR02	0.273513	13.404	2.17643	0.0451292	0.176622	-4.19687
Q8TB40	ABHD4	PMA:AR02	0.489118	11.4901	2.17627	0.0451432	0.176622	-4.19714
P17096	HMGA1	PMA:AR02	-0.857399	15.0003	-2.17587	0.0451783	0.176632	-4.19783
Q9GZZ1	NAA50	PMA:AR02	0.273125	11.4236	2.1755	0.0452104	0.176632	-4.19846
Q6ZVM7	TOM1L2	PMA:AR02	-0.29291	12.523	-2.17337	0.0453959	0.177229	-4.20209
P62820	RAB1A	PMA:AR02	-0.205195	15.0686	-2.17208	0.0455085	0.177542	-4.20428
O60828	PQBP1	PMA:AR02	0.218449	15.6549	2.17139	0.045569	0.177651	-4.20546
Q8WWI1	LMO7	PMA:AR02	0.513504	12.7113	2.16938	0.0457454	0.178211	-4.20889
A3KN83	SBNO1	PMA:AR02	0.262205	11.8899	2.16788	0.0458774	0.178271	-4.21144
O75663	TIPRL	PMA:AR02	0.235643	13.2141	2.16783	0.0458821	0.178271	-4.21153
O95182	NDUFA7	PMA:AR02	0.455108	12.6522	2.16776	0.0458878	0.178271	-4.21164
Q8WUA4	GTF3C2	PMA:AR02	-0.375787	12.1434	-2.16772	0.0458917	0.178271	-4.21171
O14980	XPO1	PMA:AR02	0.17955	15.5385	2.16631	0.0460164	0.178514	-4.21412
Q8IWV7	UBR1	PMA:AR02	0.174023	15.3569	2.16627	0.0460195	0.178514	-4.21418
Q9UPY3	DICER1	PMA:AR02	0.341495	11.6101	2.16507	0.0461256	0.178798	-4.21622
Q9P2E9	RRBP1	PMA:AR02	0.279218	13.064	2.16172	0.0464237	0.179826	-4.22192
P68400	CSNK2A1	PMA:AR02	0.323749	13.7643	2.16017	0.0465617	0.180232	-4.22455
Q86SX6	GLRX5	PMA:AR02	0.531117	10.9311	2.15889	0.0466765	0.180395	-4.22673
P19784	CSNK2A2	PMA:AR02	-0.214006	13.2085	-2.15888	0.0466774	0.180395	-4.22674
P07339	CTSD	PMA:AR02	-0.212492	16.5974	-2.15842	0.0467187	0.180395	-4.22753
Q6ZRS2	SRCAP	PMA:AR02	0.285948	13.39	2.15784	0.0467705	0.180395	-4.22851
Q68E01	INTS3	PMA:AR02	0.233059	13.1449	2.15771	0.0467826	0.180395	-4.22874
Q8WZA9	IRGQ	PMA:AR02	0.267717	12.9814	2.15714	0.0468332	0.180395	-4.22969
Q96DG6	CMBL	PMA:AR02	0.523264	11.1811	2.15712	0.0468352	0.180395	-4.22973
Q9H1K4	SLC25A18	PMA:AR02	-0.39276	12.7708	-2.15568	0.0469652	0.180768	-4.23218
P11310	ACADM	PMA:AR02	0.218537	15.4812	2.1548	0.047044	0.180944	-4.23367
P30038	ALDH4A1	PMA:AR02	0.174604	14.1719	2.15432	0.0470874	0.180983	-4.23448
O95347	SMC2	PMA:AR02	0.239628	13.6697	2.15389	0.0471268	0.181007	-4.23522
Q15036	SNX17	PMA:AR02	0.292225	13.116	2.15331	0.0471794	0.181081	-4.23621
Q9ULR0	ISY1	PMA:AR02	-0.49201	10.3389	-2.15257	0.0472457	0.181123	-4.23745
Q9BWS9	CHID1	PMA:AR02	0.353647	12.061	2.15235	0.0472663	0.181123	-4.23784
O15381	NVL	PMA:AR02	0.698749	9.82967	2.15209	0.0472899	0.181123	-4.23828
Q8N1S5	SLC39A11	PMA:AR02	0.27061	13.2753	2.14985	0.0474935	0.181775	-4.24208
P50225	SULT1A1	PMA:AR02	0.185262	16.3584	2.14928	0.0475453	0.181846	-4.24304
P62333	PSMC6	PMA:AR02	0.207066	15.2335	2.14833	0.0476319	0.182049	-4.24465
B0I1T2	MYO1G	PMA:AR02	0.181751	15.6237	2.14602	0.0478429	0.182728	-4.24856
O95759	TBC1D8	PMA:AR02	0.330404	10.8849	2.1451	0.0479271	0.182839	-4.25011
P04062	GBA1	PMA:AR02	0.24341	12.7745	2.14497	0.0479391	0.182839	-4.25033
O75884	RBBP9	PMA:AR02	0.282594	14.3949	2.14455	0.0479777	0.182859	-4.25105
Q9UMS0	NFU1	PMA:AR02	0.198446	12.2064	2.14373	0.0480534	0.182902	-4.25244
P09601	HMOX1	PMA:AR02	0.29751	11.5019	2.1437	0.0480563	0.182902	-4.25249
Q16181	SEPTIN7	PMA:AR02	0.304182	14.6633	2.14283	0.048136	0.182942	-4.25396
Q9H6Z4	RANBP3	PMA:AR02	-0.198862	12.6282	-2.14234	0.0481809	0.182942	-4.25478
O94906	PRPF6	PMA:AR02	-0.163869	13.2347	-2.1423	0.0481854	0.182942	-4.25486
Q9NRX2	MRPL17	PMA:AR02	0.342356	11.7118	2.14213	0.0482008	0.182942	-4.25514
Q9UPT8	ZC3H4	PMA:AR02	0.243086	11.635	2.14144	0.0482647	0.183057	-4.25631
Q06187	BTK	PMA:AR02	0.174154	13.9079	2.13943	0.0484507	0.183224	-4.25971
Q96AY4	TTC28	PMA:AR02	0.681726	15.9458	2.13935	0.0484575	0.183224	-4.25984
Q9NZ32	ACTR10	PMA:AR02	0.184421	12.465	2.13915	0.0484762	0.183224	-4.26018
Q9H1I8	ASCC2	PMA:AR02	0.242158	12.1845	2.1387	0.0485177	0.183224	-4.26093
P62306	SNRPF	PMA:AR02	0.257088	15.4772	2.13864	0.0485241	0.183224	-4.26105
Q7KZF4	SND1	PMA:AR02	0.17128	15.0381	2.1385	0.0485372	0.183224	-4.26129
Q71DI3	H3C14	PMA:AR02	-0.282719	20.5875	-2.13842	0.048544	0.183224	-4.26141
Q6UW63	POGLUT2	PMA:AR02	0.311664	13.7923	2.13805	0.0485784	0.183227	-4.26204
Q15751	HERC1	PMA:AR02	0.608492	10.7811	2.13681	0.0486936	0.183535	-4.26413
Q8N0Z6	TTC5	PMA:AR02	0.549046	10.5016	2.13611	0.0487591	0.183655	-4.26532
Q96EC8	YIPF6	PMA:AR02	0.568281	11.8714	2.13421	0.0489367	0.184197	-4.26853
Q9HCG8	CWC22	PMA:AR02	0.40474	12.279	2.1324	0.0491066	0.184709	-4.27159
Q9Y4H4	GPSM3	PMA:AR02	0.345252	15.8319	2.1312	0.0492194	0.185005	-4.27361
Q9UJX3	ANAPC7	PMA:AR02	0.416199	12.4131	2.13032	0.0493016	0.18516	-4.27508
P30519	HMOX2	PMA:AR02	0.191037	14.0062	2.12973	0.0493577	0.18516	-4.27609
Q9UMS4	PRPF19	PMA:AR02	0.241297	14.1035	2.12968	0.0493624	0.18516	-4.27617
P30084	ECHS1	PMA:AR02	0.231413	14.2134	2.12859	0.049465	0.185367	-4.278
O14910	LIN7A	PMA:AR02	0.513195	11.5318	2.12823	0.0494994	0.185367	-4.27862
Q2M2I8	AAK1	PMA:AR02	0.224278	13.6657	2.1278	0.0495404	0.185367	-4.27935
O95319	CELF2	PMA:AR02	0.150691	16.2479	2.12766	0.0495535	0.185367	-4.27958
O95379	TNFAIP8	PMA:AR02	0.301725	15.9836	2.12665	0.0496492	0.185506	-4.28129
Q92625	ANKS1A	PMA:AR02	0.396922	11.0822	2.12655	0.0496587	0.185506	-4.28145
Q562E7	WDR81	PMA:AR02	0.199991	12.8288	2.12419	0.0498824	0.186214	-4.28542
Q13535	ATR	PMA:AR02	0.761505	12.625	2.12334	0.0499637	0.18639	-4.28685
Q58A45	PAN3	PMA:AR02	-0.244739	11.5249	-2.12289	0.0500067	0.186423	-4.28761
Q96DV4	MRPL38	PMA:AR02	0.45077	10.8974	2.12039	0.0502463	0.186648	-4.29183
Q15653	NFKBIB	PMA:AR02	0.812768	11.6377	2.12028	0.0502561	0.186648	-4.292
Q68EM7	ARHGAP17	PMA:AR02	0.258265	13.5619	2.12005	0.0502789	0.186648	-4.2924
Q9HBL7	PLGRKT	PMA:AR02	0.258611	13.1975	2.11944	0.0503374	0.186648	-4.29343
P20702	ITGAX	PMA:AR02	0.406123	13.8848	2.11925	0.0503558	0.186648	-4.29375
Q9BYX4	IFIH1	PMA:AR02	0.486208	10.3064	2.11905	0.0503743	0.186648	-4.29407
Q86UT6	NLRX1	PMA:AR02	0.187152	13.4848	2.11877	0.0504015	0.186648	-4.29455
P43243	MATR3	PMA:AR02	0.204973	15.9854	2.11843	0.0504346	0.186648	-4.29513
Q9NW64	RBM22	PMA:AR02	0.355731	11.9518	2.1184	0.0504375	0.186648	-4.29518
Q9NUP1	BLOC1S4	PMA:AR02	-0.486176	12.771	-2.11836	0.0504407	0.186648	-4.29523
P02749	APOH	PMA:AR02	-0.47525	13.417	-2.11813	0.0504632	0.186648	-4.29563
P12694	BCKDHA	PMA:AR02	0.436225	11.1782	2.11798	0.0504777	0.186648	-4.29588
Q96BN8	OTULIN	PMA:AR02	-0.247477	13.8468	-2.1176	0.0505142	0.186656	-4.29652
Q8WVQ1	CANT1	PMA:AR02	0.210949	11.8744	2.11658	0.0506122	0.186846	-4.29823
Q9HD20	ATP13A1	PMA:AR02	0.1887	13.1046	2.11636	0.050634	0.186846	-4.2986
Q92597	NDRG1	PMA:AR02	0.258407	11.668	2.11568	0.0506998	0.186866	-4.29975
Q8IYI6	EXOC8	PMA:AR02	0.226614	13.2878	2.11559	0.050708	0.186866	-4.29989
P31153	MAT2A	PMA:AR02	0.207242	13.372	2.11494	0.0507711	0.186898	-4.30099
Q6UWD8	C16orf54	PMA:AR02	0.530462	11.4337	2.11479	0.0507854	0.186898	-4.30124
Q9H361	PABPC3	PMA:AR02	0.245817	16.1006	2.1127	0.050988	0.187471	-4.30474
P25786	PSMA1	PMA:AR02	-0.221172	15.6157	-2.11248	0.0510097	0.187471	-4.30512
Q8TBP6	SLC25A40	PMA:AR02	0.224827	12.7872	2.11203	0.0510538	0.187497	-4.30588
O43566	RGS14	PMA:AR02	0.174267	15.0229	2.1117	0.0510856	0.187497	-4.30643
Q8IUR7	ARMC8	PMA:AR02	0.212506	13.5071	2.11064	0.0511888	0.187723	-4.30821
P13796	LCP1	PMA:AR02	0.189051	20.3061	2.11036	0.0512159	0.187723	-4.30867
Q08623	PUDP	PMA:AR02	0.334265	12.2491	2.10902	0.0513474	0.188078	-4.31093
P61981	YWHAG	PMA:AR02	0.324393	15.1963	2.10854	0.0513939	0.188122	-4.31173
P27824	CANX	PMA:AR02	0.377614	18.4898	2.10751	0.051495	0.188359	-4.31346
Q9Y2S7	POLDIP2	PMA:AR02	0.317482	11.519	2.10718	0.0515276	0.188359	-4.31402
Q9H4A3	WNK1	PMA:AR02	0.187787	13.7534	2.10559	0.0516838	0.188803	-4.31668
Q9H223	EHD4	PMA:AR02	0.169552	13.919	2.10499	0.0517426	0.188892	-4.31768
Q14974	KPNB1	PMA:AR02	0.178104	16.5064	2.10396	0.0518442	0.189136	-4.31941
Q5VW32	BROX	PMA:AR02	0.189602	14.9054	2.10294	0.0519449	0.189282	-4.32112
O00409	FOXN3	PMA:AR02	0.380615	11.794	2.10285	0.0519535	0.189282	-4.32126
Q5T8P6	RBM26	PMA:AR02	0.370057	13.0289	2.10204	0.0520337	0.189387	-4.32262
Q8TCA0	LRRC20	PMA:AR02	0.284706	11.9508	2.10186	0.0520519	0.189387	-4.32293
Q9NT62	ATG3	PMA:AR02	-0.362611	14.3298	-2.10102	0.0521346	0.189562	-4.32433
Q9NVE7	PANK4	PMA:AR02	0.199716	12.5672	2.10059	0.0521779	0.189592	-4.32506
Q9BQA9	CYBC1	PMA:AR02	0.324691	13.1616	2.09974	0.0522622	0.189772	-4.32648
P13727	PRG2	PMA:AR02	0.440518	19.7048	2.09923	0.0523127	0.189829	-4.32733
Q9BYJ9	YTHDF1	PMA:AR02	0.367992	11.6293	2.09719	0.0525161	0.190441	-4.33074
Q9UPR0	PLCL2	PMA:AR02	0.225386	15.0856	2.09671	0.0525642	0.190488	-4.33155
Q16773	KYAT1	PMA:AR02	0.350638	11.6838	2.09317	0.0529189	0.191647	-4.33746
Q9UGN4	CD300A	PMA:AR02	0.450072	12.5371	2.09188	0.0530491	0.191868	-4.33962
Q92888	ARHGEF1	PMA:AR02	0.196582	16.3574	2.09187	0.0530503	0.191868	-4.33964
Q9H0E9	BRD8	PMA:AR02	0.326282	12.1088	2.0907	0.0531684	0.192167	-4.3416
O00308	WWP2	PMA:AR02	0.216831	13.3171	2.08927	0.0533124	0.19256	-4.34397
Q9H7C9	AAMDC	PMA:AR02	0.177796	13.9154	2.08876	0.0533645	0.192621	-4.34483
Q9UPW5	AGTPBP1	PMA:AR02	0.189074	13.668	2.08673	0.0535701	0.192945	-4.34821
P31749	AKT1	PMA:AR02	0.223069	13.8028	2.08654	0.0535892	0.192945	-4.34853
Q13098	GPS1	PMA:AR02	0.160712	14.405	2.08619	0.0536256	0.192945	-4.34912
Q5VW36	FOCAD	PMA:AR02	0.256079	11.6527	2.08602	0.0536421	0.192945	-4.34939
Q93009	USP7	PMA:AR02	0.169023	14.6726	2.08577	0.0536677	0.192945	-4.34981
Q7Z3B4	NUP54	PMA:AR02	0.247645	12.8804	2.08564	0.0536817	0.192945	-4.35004
P25445	FAS	PMA:AR02	0.74608	10.5153	2.08544	0.0537018	0.192945	-4.35037
Q7L211	ABHD13	PMA:AR02	0.574434	10.3753	2.0847	0.0537774	0.193036	-4.3516
Q9P0I2	EMC3	PMA:AR02	0.233991	13.3642	2.08449	0.0537982	0.193036	-4.35194
O75874	IDH1	PMA:AR02	0.222297	17.7711	2.08359	0.0538904	0.19319	-4.35345
P56192	MARS1	PMA:AR02	0.27873	16.8768	2.08338	0.0539118	0.19319	-4.3538
P84103	SRSF3	PMA:AR02	-0.282594	17.3374	-2.08145	0.0541101	0.193728	-4.35702
Q9UBC5	MYO1A	PMA:AR02	0.644944	11.5623	2.08088	0.0541679	0.193728	-4.35796
P68871	HBB	PMA:AR02	-0.781416	15.7877	-2.08088	0.0541686	0.193728	-4.35797
P45974	USP5	PMA:AR02	0.196023	18.8282	2.07911	0.0543506	0.19421	-4.36092
O14561	NDUFAB1	PMA:AR02	0.490701	12.1198	2.07888	0.0543744	0.19421	-4.3613
P17812	CTPS1	PMA:AR02	0.188288	14.0444	2.07838	0.0544257	0.194259	-4.36213
Q96N21	TEPSIN	PMA:AR02	0.806649	8.04197	2.07805	0.0544594	0.194259	-4.36267
Q9BVA1	TUBB2B	PMA:AR02	0.218998	18.0552	2.07754	0.0545125	0.194321	-4.36353
Q9BUF5	TUBB6	PMA:AR02	0.344475	14.1856	2.07705	0.0545633	0.194375	-4.36435
O75367	MACROH2A1	PMA:AR02	0.225878	18.8894	2.07649	0.0546205	0.194452	-4.36527
P04233	CD74	PMA:AR02	-0.40099	12.8285	-2.075	0.0547751	0.194783	-4.36775
O95202	LETM1	PMA:AR02	0.24705	13.2218	2.07455	0.0548219	0.194783	-4.3685
Q99614	TTC1	PMA:AR02	0.215115	14.2334	2.07446	0.0548316	0.194783	-4.36865
Q14571	ITPR2	PMA:AR02	0.302271	12.0431	2.07422	0.0548563	0.194783	-4.36905
Q9H1K1	ISCU	PMA:AR02	0.734157	10.2712	2.07324	0.0549581	0.194889	-4.37067
Q9BZD3		PMA:AR02	0.674604	11.33	2.07321	0.0549617	0.194889	-4.37073
O95394	PGM3	PMA:AR02	0.286815	13.1561	2.07264	0.0550204	0.194889	-4.37167
P22304	IDS	PMA:AR02	0.485012	10.3049	2.07256	0.0550291	0.194889	-4.37181
P18206	VCL	PMA:AR02	0.170253	17.6384	2.07089	0.0552036	0.19538	-4.37459
Q96S52	PIGS	PMA:AR02	0.273496	12.0709	2.06988	0.0553092	0.195627	-4.37626
O43813	LANCL1	PMA:AR02	0.288116	13.9419	2.06843	0.0554614	0.195937	-4.37867
P06576	ATP5F1B	PMA:AR02	0.185927	17.9341	2.06811	0.0554947	0.195937	-4.3792
Q7L0Y3	TRMT10C	PMA:AR02	-0.314373	12.2342	-2.06754	0.0555548	0.195937	-4.38015
Q14376	GALE	PMA:AR02	0.318101	13.5715	2.06732	0.0555772	0.195937	-4.3805
Q8TC12	RDH11	PMA:AR02	0.292847	12.6343	2.06732	0.0555778	0.195937	-4.38051
Q9BY77	POLDIP3	PMA:AR02	-0.254852	11.8031	-2.06676	0.0556364	0.195937	-4.38143
A0AVT1	UBA6	PMA:AR02	0.15394	14.6015	2.06638	0.0556762	0.195937	-4.38206
Q6PJ69	TRIM65	PMA:AR02	-0.431282	11.2554	-2.06631	0.0556843	0.195937	-4.38219
P51398	DAP3	PMA:AR02	0.227893	12.1543	2.06456	0.0558683	0.196458	-4.38508
O43516	WIPF1	PMA:AR02	0.15142	16.9815	2.06369	0.0559609	0.196502	-4.38653
Q9BXB4	OSBPL11	PMA:AR02	0.187457	13.1576	2.06369	0.055961	0.196502	-4.38654
P60763	RAC3	PMA:AR02	0.304938	11.5194	2.06308	0.0560257	0.196502	-4.38755
P23786	CPT2	PMA:AR02	0.221079	14.1234	2.06293	0.0560412	0.196502	-4.38779
Q9H2G2	SLK	PMA:AR02	0.212093	16.0034	2.06274	0.0560612	0.196502	-4.3881
Q8IY67	RAVER1	PMA:AR02	0.207005	13.1901	2.06238	0.0560994	0.19651	-4.3887
Q8NEW0	SLC30A7	PMA:AR02	0.213815	13.8976	2.06125	0.0562194	0.196804	-4.39057
Q9UP83	COG5	PMA:AR02	0.259377	11.7698	2.05973	0.0563807	0.197242	-4.39308
Q15554	TERF2	PMA:AR02	0.318577	12.3159	2.05873	0.0564881	0.197283	-4.39475
O00233	PSMD9	PMA:AR02	-0.162096	15.5194	-2.05856	0.0565056	0.197283	-4.39502
Q14C86	GAPVD1	PMA:AR02	0.165958	13.8227	2.05852	0.0565105	0.197283	-4.3951
Q8N684	CPSF7	PMA:AR02	0.16731	14.5125	2.05827	0.0565372	0.197283	-4.39551
Q13242	SRSF9	PMA:AR02	0.289287	13.3228	2.05789	0.0565775	0.197298	-4.39614
Q9BUB5	MKNK1	PMA:AR02	0.327421	11.0605	2.05633	0.0567451	0.197756	-4.39873
Q13151	HNRNPA0	PMA:AR02	0.377226	13.2365	2.05592	0.0567884	0.19778	-4.3994
O95793	STAU1	PMA:AR02	0.465531	12.0402	2.0546	0.0569304	0.198148	-4.40158
Q96LJ7	DHRS1	PMA:AR02	-0.315908	12.3464	-2.05396	0.0569989	0.19826	-4.40264
P14927	UQCRB	PMA:AR02	0.237826	13.6043	2.05081	0.0573389	0.199213	-4.40784
P19971	TYMP	PMA:AR02	0.210496	16.1799	2.0501	0.0574161	0.199213	-4.40902
Q5T440	IBA57	PMA:AR02	0.453107	11.3836	2.04977	0.0574522	0.199213	-4.40957
P15311	EZR	PMA:AR02	0.241997	19.8305	2.04947	0.0574837	0.199213	-4.41005
Q99733	NAP1L4	PMA:AR02	-0.296857	14.5874	-2.04946	0.0574849	0.199213	-4.41007
O14880	MGST3	PMA:AR02	0.360069	13.4497	2.04925	0.0575078	0.199213	-4.41042
Q9BZ67	FRMD8	PMA:AR02	-0.291447	11.6005	-2.04901	0.0575342	0.199213	-4.41082
Q15596	NCOA2	PMA:AR02	0.563577	11.0619	2.04873	0.057565	0.199213	-4.41129
Q15075	EEA1	PMA:AR02	0.194103	14.1182	2.04765	0.057682	0.199491	-4.41307
Q9Y2X0	MED16	PMA:AR02	0.390313	11.0182	2.04663	0.0577925	0.199531	-4.41474
O60925	PFDN1	PMA:AR02	0.19029	14.0537	2.04662	0.0577937	0.199531	-4.41476
P36507	MAP2K2	PMA:AR02	0.18207	14.8357	2.04566	0.0578986	0.199531	-4.41635
Q8WVM8	SCFD1	PMA:AR02	0.247357	14.5106	2.04556	0.0579098	0.199531	-4.41652
Q13952	NFYC	PMA:AR02	-0.292743	13.4723	-2.04517	0.0579526	0.199531	-4.41716
Q6UX71	PLXDC2	PMA:AR02	0.966486	9.1957	2.04494	0.0579773	0.199531	-4.41753
O75400	PRPF40A	PMA:AR02	0.36875	14.2127	2.04461	0.0580134	0.199531	-4.41808
Q8WVV9	HNRNPLL	PMA:AR02	0.220617	13.0135	2.04442	0.0580338	0.199531	-4.41839
Q9H0J9	PARP12	PMA:AR02	0.309476	12.1236	2.04432	0.0580449	0.199531	-4.41855
O00462	MANBA	PMA:AR02	0.176581	13.9736	2.04419	0.0580593	0.199531	-4.41877
Q15942	ZYX	PMA:AR02	0.20361	17.0342	2.04146	0.0583585	0.200433	-4.42327
Q96EP5	DAZAP1	PMA:AR02	0.410693	13.8857	2.03898	0.0586326	0.201247	-4.42736
O15084	ANKRD28	PMA:AR02	0.307552	12.9018	2.0383	0.0587072	0.201377	-4.42847
P40616	ARL1	PMA:AR02	0.170693	15.3091	2.03747	0.0587989	0.201526	-4.42984
O94967	WDR47	PMA:AR02	0.321882	12.0418	2.03724	0.0588246	0.201526	-4.43022
Q9Y5K8	ATP6V1D	PMA:AR02	0.535541	12.6697	2.03431	0.0591497	0.202505	-4.43504
Q5T0D9	TPRG1L	PMA:AR02	0.374948	11.3898	2.03349	0.0592417	0.202505	-4.4364
Q13838	DDX39B	PMA:AR02	0.163642	17.3559	2.03334	0.0592586	0.202505	-4.43665
Q99590	SCAF11	PMA:AR02	-0.547964	10.7077	-2.03308	0.0592873	0.202505	-4.43707
Q9Y530	OARD1	PMA:AR02	0.448849	13.7088	2.033	0.059296	0.202505	-4.4372
P49593	PPM1F	PMA:AR02	-0.147361	13.8455	-2.03221	0.0593839	0.202678	-4.43849
Q01970	PLCB3	PMA:AR02	-0.243883	11.7931	-2.02888	0.0597575	0.203702	-4.44397
Q8WUH6	TMEM263	PMA:AR02	-0.399638	11.5619	-2.02887	0.0597585	0.203702	-4.44398
P23229	ITGA6	PMA:AR02	0.295962	12.2634	2.02823	0.05983	0.203818	-4.44503
Q9H6E4	CCDC134	PMA:AR02	-0.691601	10.5768	-2.02638	0.0600392	0.204403	-4.44808
Q86VS8	HOOK3	PMA:AR02	0.305416	16.9246	2.02538	0.060152	0.20466	-4.44972
Q6NSW5		PMA:AR02	0.233371	14.0626	2.02462	0.060238	0.204824	-4.45096
P48443	RXRG	PMA:AR02	0.439786	10.9988	2.02357	0.0603568	0.204877	-4.45268
O00330	PDHX	PMA:AR02	0.349158	12.0459	2.0233	0.0603871	0.204877	-4.45312
Q8NI08	NCOA7	PMA:AR02	0.206457	11.8174	2.02317	0.0604024	0.204877	-4.45334
Q9NQT8	KIF13B	PMA:AR02	0.201655	12.9186	2.02315	0.0604039	0.204877	-4.45336
Q9P2M7	CGN	PMA:AR02	1.8262	13.3781	2.02207	0.0605268	0.205167	-4.45514
P32942	ICAM3	PMA:AR02	0.37329	17.685	2.02098	0.0606506	0.205459	-4.45692
P05186	ALPL	PMA:AR02	0.463855	12.7657	2.02064	0.0606898	0.205464	-4.45748
Q96PV6	LENG8	PMA:AR02	0.420498	10.5849	2.0202	0.0607399	0.205506	-4.4582
Q9H8W4	PLEKHF2	PMA:AR02	0.330517	13.938	2.01893	0.0608848	0.2058	-4.46028
P13797	PLS3	PMA:AR02	0.213922	19.4534	2.01878	0.0609024	0.2058	-4.46054
Q14004	CDK13	PMA:AR02	0.419165	12.1613	2.0183	0.0609572	0.205858	-4.46132
P55061	TMBIM6	PMA:AR02	0.364697	13.7645	2.01766	0.0610307	0.205978	-4.46237
P43686	PSMC4	PMA:AR02	-0.138898	14.9348	-2.01725	0.0610773	0.206008	-4.46304
P27361	MAPK3	PMA:AR02	0.136908	17.0265	2.01652	0.0611611	0.206163	-4.46423
Q9Y4E8	USP15	PMA:AR02	0.202083	13.8909	2.0158	0.0612429	0.206312	-4.4654
O95758	PTBP3	PMA:AR02	0.219691	14.2735	2.01497	0.0613394	0.20636	-4.46677
P38646	HSPA9	PMA:AR02	0.190022	15.9927	2.01474	0.0613659	0.20636	-4.46715
P49840	GSK3A	PMA:AR02	0.245383	12.9027	2.01466	0.0613743	0.20636	-4.46727
P67936	TPM4	PMA:AR02	-0.424024	15.2725	-2.01436	0.0614085	0.20636	-4.46775
P58004	SESN2	PMA:AR02	-0.263642	11.8041	-2.01376	0.0614778	0.206465	-4.46874
P19838	NFKB1	PMA:AR02	0.160354	14.4276	2.01237	0.0616391	0.20688	-4.47102
Q8NHU6	TDRD7	PMA:AR02	0.233178	12.5278	2.01204	0.061677	0.20688	-4.47156
Q6DD88	ATL3	PMA:AR02	0.239896	14.015	2.01069	0.0618331	0.207276	-4.47376
Q9NTJ4	MAN2C1	PMA:AR02	0.218116	12.2868	2.01035	0.0618726	0.207281	-4.47432
Q5R3I4	TTC38	PMA:AR02	0.280872	12.3255	2.00938	0.0619848	0.207529	-4.47589
P54252	ATXN3	PMA:AR02	-0.402999	13.0299	-2.00726	0.0622319	0.208229	-4.47936
Q5THJ4	VPS13D	PMA:AR02	0.370443	10.7837	2.00537	0.0624525	0.208839	-4.48244
Q9UIF9	BAZ2A	PMA:AR02	0.704777	9.77914	2.00455	0.0625481	0.208926	-4.48378
P51580	TPMT	PMA:AR02	0.381744	11.6992	2.00362	0.062658	0.208926	-4.48531
Q9BZF1	OSBPL8	PMA:AR02	0.273824	13.1191	2.00332	0.0626927	0.208926	-4.48579
P35749	MYH11	PMA:AR02	0.175363	18.2418	2.00325	0.0627007	0.208926	-4.4859
Q9H9A6	LRRC40	PMA:AR02	0.144488	13.3651	2.00316	0.0627112	0.208926	-4.48604
Q09472	EP300	PMA:AR02	0.21876	13.3296	2.00313	0.0627145	0.208926	-4.48609
Q8TAQ2	SMARCC2	PMA:AR02	0.159473	14.8278	2.00286	0.0627469	0.208926	-4.48654
Q53H82	LACTB2	PMA:AR02	0.247146	13.598	2.00213	0.0628329	0.209031	-4.48773
Q9H9Q4	NHEJ1	PMA:AR02	0.679222	10.8323	2.00194	0.0628549	0.209031	-4.48804
P55039	DRG2	PMA:AR02	0.188518	12.9621	1.99901	0.0632005	0.209944	-4.49281
Q6BDS2	BLTP3A	PMA:AR02	-0.439554	15.9038	-1.99896	0.0632066	0.209944	-4.49289
Q9HCG7	GBA2	PMA:AR02	0.692534	8.77198	1.99863	0.0632452	0.209945	-4.49343
Q9H9G7	AGO3	PMA:AR02	0.264536	12.6778	1.99682	0.06346	0.210463	-4.49638
O75844	ZMPSTE24	PMA:AR02	0.224714	14.4442	1.99666	0.0634786	0.210463	-4.49663
O75110	ATP9A	PMA:AR02	0.214789	12.7404	1.99569	0.063594	0.210602	-4.49821
P49184	DNASE1L1	PMA:AR02	0.438957	12.3415	1.99535	0.0636344	0.210602	-4.49877
Q9ULV4	CORO1C	PMA:AR02	0.220963	16.5132	1.99524	0.0636478	0.210602	-4.49895
P48506	GCLC	PMA:AR02	0.177571	13.6729	1.99501	0.063675	0.210602	-4.49932
Q8IYD8	FANCM	PMA:AR02	1.29476	13.5214	1.99355	0.0638485	0.211048	-4.50169
Q15382	RHEB	PMA:AR02	0.156508	14.7091	1.99187	0.0640497	0.211585	-4.50442
P17275	JUNB	PMA:AR02	-0.911977	10.4583	-1.99085	0.0641714	0.211859	-4.50607
P29401	TKT	PMA:AR02	0.250162	19.7274	1.98847	0.0644574	0.212372	-4.50994
Q15691	MAPRE1	PMA:AR02	-0.277465	13.7922	-1.98841	0.0644653	0.212372	-4.51005
A8MVW0	FAM171A2	PMA:AR02	-0.267512	14.6125	-1.98806	0.0645074	0.212372	-4.51062
Q5TBB1	RNASEH2B	PMA:AR02	0.299453	11.1751	1.98787	0.0645292	0.212372	-4.51091
Q96HR3	MED30	PMA:AR02	0.368945	11.0829	1.98677	0.0646622	0.212372	-4.5127
Q8NB49	ATP11C	PMA:AR02	-0.348514	13.8368	-1.9866	0.0646826	0.212372	-4.51297
Q9Y3B2	EXOSC1	PMA:AR02	0.467521	11.6332	1.98652	0.0646927	0.212372	-4.51311
O75191	XYLB	PMA:AR02	0.335041	11.3131	1.98634	0.0647146	0.212372	-4.5134
Q7Z5R6	APBB1IP	PMA:AR02	0.205123	15.5421	1.98633	0.064715	0.212372	-4.51341
Q99719	SEPTIN5	PMA:AR02	-0.171274	15.6107	-1.98633	0.0647161	0.212372	-4.51342
P57740	NUP107	PMA:AR02	0.191413	13.7394	1.98513	0.0648609	0.212719	-4.51537
Q8N1F7	NUP93	PMA:AR02	0.166219	14.4477	1.98474	0.0649081	0.212746	-4.516
O43759	SYNGR1	PMA:AR02	0.210817	14.284	1.98418	0.0649752	0.21282	-4.5169
P48735	IDH2	PMA:AR02	0.132625	15.812	1.9838	0.0650214	0.21282	-4.51751
P11047	LAMC1	PMA:AR02	1.05773	8.5155	1.98358	0.0650479	0.21282	-4.51787
P60228	EIF3E	PMA:AR02	0.190221	14.917	1.98323	0.0650908	0.212833	-4.51844
Q9P1Y6	PHRF1	PMA:AR02	0.645235	11.598	1.9823	0.0652043	0.213076	-4.51995
Q96AE4	FUBP1	PMA:AR02	0.15033	15.6388	1.98015	0.0654664	0.213805	-4.52344
Q9BWD1	ACAT2	PMA:AR02	0.20531	15.5035	1.97738	0.0658052	0.214782	-4.52792
Q96BY6	DOCK10	PMA:AR02	0.207835	13.5032	1.97528	0.0660628	0.215494	-4.53131
Q16854	DGUOK	PMA:AR02	0.342063	12.2375	1.97251	0.0664048	0.216481	-4.53579
Q9H4B7	TUBB1	PMA:AR02	-0.370609	15.0038	-1.97209	0.0664557	0.216517	-4.53646
Q96GG9	DCUN1D1	PMA:AR02	0.213965	13.4657	1.96999	0.0667163	0.217236	-4.53986
P48556	PSMD8	PMA:AR02	0.186681	15.0015	1.96876	0.0668688	0.217603	-4.54184
P07195	LDHB	PMA:AR02	0.161594	19.101	1.96767	0.0670047	0.217903	-4.5436
Q96T37	RBM15	PMA:AR02	0.278556	12.8723	1.96738	0.0670408	0.217903	-4.54406
Q9BWT3	PAPOLG	PMA:AR02	0.271401	12.6596	1.96702	0.067086	0.21792	-4.54465
O14732	IMPA2	PMA:AR02	-0.313185	15.5454	-1.96618	0.0671912	0.218087	-4.54601
P14316	IRF2	PMA:AR02	0.509863	10.8528	1.96586	0.0672305	0.218087	-4.54651
O75691	UTP20	PMA:AR02	0.40007	12.0494	1.96565	0.0672576	0.218087	-4.54686
P62249	RPS16	PMA:AR02	-0.280735	16.5926	-1.96421	0.0674371	0.218522	-4.54917
P05164	MPO	PMA:AR02	-0.210324	21.3108	-1.96394	0.0674717	0.218522	-4.54962
P09496	CLTA	PMA:AR02	-0.216917	14.429	-1.96297	0.0675935	0.218786	-4.55118
Q9BR61	ACBD6	PMA:AR02	0.335285	10.7058	1.96203	0.0677116	0.219039	-4.5527
P31942	HNRNPH3	PMA:AR02	0.185519	15.5434	1.96153	0.0677747	0.219106	-4.5535
Q9Y2X9	ZNF281	PMA:AR02	0.778409	10.3801	1.96122	0.0678129	0.219106	-4.55399
Q9H8S9	MOB1A	PMA:AR02	0.366097	15.4673	1.95966	0.0680098	0.219613	-4.5565
Q02224	CENPE	PMA:AR02	0.345202	15.011	1.95717	0.0683255	0.220501	-4.56051
P67812	SEC11A	PMA:AR02	-0.201259	16.7258	-1.95616	0.0684542	0.220786	-4.56214
Q86V48	LUZP1	PMA:AR02	0.384168	11.4113	1.95554	0.0685322	0.220907	-4.56313
Q8TEA7	TBCK	PMA:AR02	0.354568	11.0665	1.95372	0.0687649	0.221526	-4.56607
Q9BZ68		PMA:AR02	0.382102	12.3331	1.95313	0.06884	0.221637	-4.56701
O00483	NDUFA4	PMA:AR02	-0.182484	13.8814	-1.95176	0.0690147	0.222069	-4.56921
Q8TDB6	DTX3L	PMA:AR02	-0.202093	12.6626	-1.95048	0.0691793	0.22241	-4.57127
Q9H7M9	VSIR	PMA:AR02	0.351482	13.5237	1.9503	0.0692024	0.22241	-4.57156
Q15008	PSMD6	PMA:AR02	0.19121	15.8388	1.94953	0.0693012	0.222596	-4.57279
Q12768	WASHC5	PMA:AR02	0.206132	14.5875	1.94917	0.0693476	0.222611	-4.57337
P78536	ADAM17	PMA:AR02	0.308333	11.833	1.94886	0.0693873	0.222611	-4.57386
P62805	H4C9	PMA:AR02	-0.24516	21.2356	-1.9483	0.069459	0.22271	-4.57476
O43390	HNRNPR	PMA:AR02	-0.172999	15.9301	-1.94682	0.0696496	0.22319	-4.57713
Q9NVZ3	NECAP2	PMA:AR02	-0.164156	14.1081	-1.94519	0.0698604	0.223734	-4.57974
Q9GZT3	SLIRP	PMA:AR02	0.283433	12.4749	1.94417	0.0699923	0.224025	-4.58137
Q8IZP0	ABI1	PMA:AR02	-0.203381	14.0205	-1.94268	0.0701853	0.224511	-4.58376
Q9Y4X5	ARIH1	PMA:AR02	0.394804	10.9561	1.94076	0.0704364	0.225182	-4.58684
P09874	PARP1	PMA:AR02	0.199259	14.1917	1.94022	0.070506	0.225217	-4.5877
Q16401	PSMD5	PMA:AR02	0.164836	15.3522	1.94004	0.07053	0.225217	-4.58799
Q68DK2	ZFYVE26	PMA:AR02	0.281834	11.8285	1.93861	0.0707163	0.22568	-4.59027
P31930	UQCRC1	PMA:AR02	-0.195374	14.4257	-1.93736	0.0708799	0.22607	-4.59227
Q8IZ81	ELMOD2	PMA:AR02	0.201247	13.4144	1.93563	0.0711076	0.226663	-4.59504
Q9Y6B7	AP4B1	PMA:AR02	0.277396	11.2542	1.9351	0.0711774	0.226753	-4.59589
Q9H081	MIS12	PMA:AR02	0.597552	12.5255	1.93463	0.0712392	0.226818	-4.59664
P15121	AKR1B1	PMA:AR02	0.291636	13.0803	1.93364	0.0713694	0.226994	-4.59821
O95139	NDUFB6	PMA:AR02	-0.569503	9.77931	-1.93358	0.0713778	0.226994	-4.59832
Q9UKT5	FBXO4	PMA:AR02	-0.251962	12.3431	-1.93309	0.0714423	0.227026	-4.5991
Q13426	XRCC4	PMA:AR02	0.309695	13.5532	1.93287	0.0714711	0.227026	-4.59944
O75334	PPFIA2	PMA:AR02	-0.374874	14.8564	-1.92999	0.0718529	0.228106	-4.60404
Q9UJV9	DDX41	PMA:AR02	0.188517	12.6403	1.92686	0.0722699	0.229296	-4.60904
P28838	LAP3	PMA:AR02	0.128911	14.4475	1.92624	0.0723525	0.229425	-4.61002
P62899	RPL31	PMA:AR02	-0.465294	15.447	-1.9254	0.0724642	0.229551	-4.61136
Q15052	ARHGEF6	PMA:AR02	0.170006	15.6463	1.92529	0.0724789	0.229551	-4.61153
O75410	TACC1	PMA:AR02	0.398734	11.658	1.92499	0.0725186	0.229551	-4.612
O95295	SNAPIN	PMA:AR02	0.24502	14.0045	1.92466	0.0725639	0.229561	-4.61254
Q14469	HES1	PMA:AR02	0.257782	14.5261	1.92391	0.0726641	0.229698	-4.61373
Q96RL1	UIMC1	PMA:AR02	0.305113	10.6867	1.9237	0.0726915	0.229698	-4.61406
P15848	ARSB	PMA:AR02	0.208954	15.4013	1.92336	0.0727382	0.229713	-4.61461
P48444	ARCN1	PMA:AR02	0.147421	15.324	1.92213	0.0729031	0.2301	-4.61656
Q8N573	OXR1	PMA:AR02	0.18694	12.7294	1.92142	0.0729981	0.230267	-4.61769
P27694	RPA1	PMA:AR02	0.15639	14.5014	1.9202	0.0731622	0.230632	-4.61962
Q9BSD7	NTPCR	PMA:AR02	0.350561	12.3833	1.91994	0.0731983	0.230632	-4.62005
Q96FX7	TRMT61A	PMA:AR02	0.452393	11.8566	1.91924	0.0732917	0.230793	-4.62115
Q71F56	MED13L	PMA:AR02	0.594823	11.0435	1.91833	0.0734147	0.231047	-4.62259
Q53F19	NCBP3	PMA:AR02	0.523018	11.6905	1.91798	0.0734631	0.231065	-4.62316
Q9NXD2	MTMR10	PMA:AR02	0.204995	14.6823	1.91767	0.0735051	0.231065	-4.62366
P09651	HNRNPA1	PMA:AR02	0.219543	17.2417	1.91653	0.0736599	0.231418	-4.62547
O60547	GMDS	PMA:AR02	0.196354	13.7572	1.91596	0.0737371	0.231511	-4.62637
P61106	RAB14	PMA:AR02	0.282861	16.0304	1.91555	0.0737917	0.231511	-4.62701
O95696	BRD1	PMA:AR02	0.313173	14.1135	1.91537	0.073817	0.231511	-4.6273
P53677	AP3M2	PMA:AR02	-0.361694	13.7769	-1.91415	0.0739826	0.231803	-4.62924
Q9Y618	NCOR2	PMA:AR02	-0.606638	13.4309	-1.91406	0.073995	0.231803	-4.62938
Q15648	MED1	PMA:AR02	0.196486	11.7007	1.9113	0.074372	0.232719	-4.63376
P00568	AK1	PMA:AR02	-0.658306	12.5545	-1.91103	0.074409	0.232719	-4.63419
Q8IWZ8	SUGP1	PMA:AR02	0.260095	11.8298	1.91098	0.0744154	0.232719	-4.63426
Q4G176	ACSF3	PMA:AR02	0.318892	11.0731	1.91042	0.0744926	0.232827	-4.63515
P28074	PSMB5	PMA:AR02	-0.25051	12.6346	-1.90871	0.0747274	0.233266	-4.63786
P61088	UBE2N	PMA:AR02	0.189755	17.3976	1.90815	0.0748051	0.233266	-4.63876
P06737	PYGL	PMA:AR02	0.172703	18.7144	1.90809	0.0748132	0.233266	-4.63885
P49959	MRE11	PMA:AR02	0.207665	13.7587	1.90784	0.0748472	0.233266	-4.63924
Q9NWW6	NMRK1	PMA:AR02	-0.422268	11.5248	-1.90759	0.0748812	0.233266	-4.63963
Q9UPN6	SCAF8	PMA:AR02	0.313178	12.8445	1.90753	0.0748899	0.233266	-4.63973
Q99575	POP1	PMA:AR02	0.285575	10.8539	1.90548	0.0751729	0.234014	-4.64298
Q13148	TARDBP	PMA:AR02	0.275183	14.4827	1.90513	0.0752215	0.234032	-4.64354
Q9GZN7	ROGDI	PMA:AR02	0.532376	11.5251	1.90362	0.07543	0.234546	-4.64592
Q9NR50	EIF2B3	PMA:AR02	0.288939	12.2922	1.90331	0.0754728	0.234546	-4.64641
Q13642	FHL1	PMA:AR02	0.260696	12.9384	1.90176	0.0756888	0.235084	-4.64886
Q7L2H7	EIF3M	PMA:AR02	0.299819	13.4552	1.90112	0.0757779	0.235226	-4.64988
Q96RP9	GFM1	PMA:AR02	0.205263	12.3931	1.89995	0.0759409	0.235598	-4.65172
O75131	CPNE3	PMA:AR02	0.109419	17.8127	1.89955	0.0759963	0.235636	-4.65235
P49354	FNTA	PMA:AR02	0.194905	13.6844	1.89896	0.0760782	0.235756	-4.65328
Q86SQ7	SDCCAG8	PMA:AR02	0.811057	9.40814	1.89839	0.0761589	0.235771	-4.65419
Q01433	AMPD2	PMA:AR02	0.159052	14.7398	1.89831	0.0761694	0.235771	-4.65431
Q4KMQ2	ANO6	PMA:AR02	0.219001	13.9835	1.89741	0.0762949	0.235991	-4.65572
P04150	NR3C1	PMA:AR02	0.243916	12.1507	1.89719	0.076327	0.235991	-4.65609
Q15836	VAMP3	PMA:AR02	-0.558603	11.852	-1.89644	0.0764318	0.236181	-4.65726
P28072	PSMB6	PMA:AR02	-0.187008	14.7249	-1.89568	0.0765389	0.236378	-4.65847
Q9C0B0	UNK	PMA:AR02	0.318207	10.6035	1.8938	0.0768022	0.237025	-4.66142
P20042	EIF2S2	PMA:AR02	-0.230141	13.6748	-1.89357	0.0768353	0.237025	-4.66179
Q92621	NUP205	PMA:AR02	0.149884	13.6622	1.89324	0.0768816	0.237033	-4.66231
Q9NY65	TUBA8	PMA:AR02	-0.309374	17.4728	-1.892	0.0770566	0.237142	-4.66426
P21580	TNFAIP3	PMA:AR02	0.277053	12.1964	1.8919	0.0770703	0.237142	-4.66441
Q14126	DSG2	PMA:AR02	0.205727	14.1075	1.89188	0.0770739	0.237142	-4.66445
Q08499	PDE4D	PMA:AR02	-0.302791	11.1911	-1.89156	0.0771196	0.237142	-4.66496
Q14289	PTK2B	PMA:AR02	0.126559	14.9679	1.89145	0.0771341	0.237142	-4.66512
P25685	DNAJB1	PMA:AR02	0.210273	13.9207	1.89114	0.0771786	0.237145	-4.66562
P61923	COPZ1	PMA:AR02	-0.538635	13.0811	-1.88523	0.0780181	0.239492	-4.67491
O00329	PIK3CD	PMA:AR02	0.157677	15.1379	1.88515	0.0780302	0.239492	-4.67504
P18065	IGFBP2	PMA:AR02	-0.574934	10.7558	-1.88465	0.0781011	0.239558	-4.67582
Q9Y6A4	CFAP20	PMA:AR02	-0.275385	13.101	-1.8841	0.0781797	0.239558	-4.67669
Q7KZI7	MARK2	PMA:AR02	0.225104	14.6112	1.88408	0.0781834	0.239558	-4.67673
Q96HW7	INTS4	PMA:AR02	0.194397	12.2728	1.88368	0.0782401	0.239572	-4.67735
Q9H2D6	TRIOBP	PMA:AR02	0.223345	12.3852	1.88343	0.0782761	0.239572	-4.67774
O43660	PLRG1	PMA:AR02	0.269406	11.6282	1.88296	0.0783437	0.239645	-4.67848
O00750	PIK3C2B	PMA:AR02	0.446586	12.5044	1.88255	0.0784028	0.239691	-4.67913
P49336	CDK8	PMA:AR02	-0.507283	12.4154	-1.88218	0.0784555	0.239697	-4.67971
P08697	SERPINF2	PMA:AR02	0.498245	15.4097	1.88192	0.0784926	0.239697	-4.68011
O95400	CD2BP2	PMA:AR02	0.361494	12.2598	1.88143	0.0785628	0.239777	-4.68088
Q05823	RNASEL	PMA:AR02	0.269157	12.1465	1.88082	0.0786514	0.239913	-4.68185
Q96NW4	ANKRD27	PMA:AR02	0.304146	11.4152	1.8803	0.0787256	0.240005	-4.68266
P14735	IDE	PMA:AR02	0.167995	13.7433	1.87952	0.0788381	0.240147	-4.68388
O95989	NUDT3	PMA:AR02	0.169958	13.8138	1.87937	0.0788601	0.240147	-4.68412
Q9Y6B6	SAR1B	PMA:AR02	0.204856	13.581	1.87892	0.0789244	0.240209	-4.68482
Q8IXQ6	PARP9	PMA:AR02	0.365427	11.4597	1.87783	0.079082	0.240421	-4.68653
Q00013	MPP1	PMA:AR02	0.187446	14.0178	1.87783	0.0790824	0.240421	-4.68654
P35611	ADD1	PMA:AR02	0.152927	15.3593	1.87696	0.0792089	0.240437	-4.68791
Q8TF05	PPP4R1	PMA:AR02	0.181374	14.7992	1.8769	0.0792175	0.240437	-4.688
P61225	RAP2B	PMA:AR02	0.448065	14.5718	1.87686	0.0792231	0.240437	-4.68806
Q96GE9	DMAC1	PMA:AR02	-0.746338	9.31475	-1.8763	0.0793048	0.240437	-4.68894
Q9NWA0	MED9	PMA:AR02	0.52465	9.98416	1.87627	0.079308	0.240437	-4.68898
Q00765	REEP5	PMA:AR02	-0.187613	15.4827	-1.87595	0.0793546	0.240445	-4.68948
Q9UBT2	UBA2	PMA:AR02	-0.211164	13.9529	-1.87555	0.0794131	0.240488	-4.69011
Q8TF09	DYNLRB2	PMA:AR02	-0.356016	12.7191	-1.87508	0.0794813	0.240561	-4.69085
P43304	GPD2	PMA:AR02	0.16495	15.7866	1.87436	0.0795859	0.240744	-4.69198
Q9NR80	ARHGEF4	PMA:AR02	0.544658	10.7092	1.87366	0.0796873	0.240835	-4.69307
Q8IU81	IRF2BP1	PMA:AR02	0.609979	10.8324	1.87355	0.0797042	0.240835	-4.69325
Q86W50	METTL16	PMA:AR02	0.486934	11.2951	1.87261	0.0798404	0.240979	-4.69471
Q9NYL9	TMOD3	PMA:AR02	0.173722	15.3688	1.87253	0.0798521	0.240979	-4.69484
O15118	NPC1	PMA:AR02	0.342927	12.2086	1.87231	0.0798845	0.240979	-4.69519
Q96AX1	VPS33A	PMA:AR02	0.239865	14.2612	1.87055	0.0801422	0.241623	-4.69795
Q86X10	RALGAPB	PMA:AR02	0.157137	13.2511	1.86906	0.08036	0.242146	-4.70027
Q15819	UBE2V2	PMA:AR02	0.335149	12.5853	1.86831	0.0804696	0.242342	-4.70144
Q7L9L4	MOB1B	PMA:AR02	0.249105	13.9465	1.8679	0.0805308	0.242392	-4.70209
Q6ZPD9	DPY19L3	PMA:AR02	0.503533	11.7592	1.86759	0.080576	0.242395	-4.70257
P21291	CSRP1	PMA:AR02	0.220528	13.9952	1.86659	0.0807228	0.242702	-4.70413
Q13586	STIM1	PMA:AR02	0.206444	14.3237	1.86524	0.0809228	0.24317	-4.70625
Q6I9Y2	THOC7	PMA:AR02	0.281046	12.1987	1.86469	0.0810029	0.243276	-4.70709
P19823	ITIH2	PMA:AR02	0.548103	16.5352	1.86321	0.0812231	0.243803	-4.70942
Q6DN03		PMA:AR02	0.729223	16.7209	1.86128	0.0815093	0.244528	-4.71243
P07093	SERPINE2	PMA:AR02	0.364663	12.1216	1.86084	0.0815747	0.24459	-4.71311
O75832	PSMD10	PMA:AR02	0.330531	12.4269	1.86013	0.0816799	0.24477	-4.71422
P07332	FES	PMA:AR02	0.210674	14.975	1.85951	0.0817725	0.244913	-4.71518
Q16576	RBBP7	PMA:AR02	-0.189663	14.0035	-1.85918	0.0818206	0.244923	-4.71569
Q8IXK0	PHC2	PMA:AR02	0.584479	10.779	1.85876	0.0818832	0.244976	-4.71634
Q16513	PKN2	PMA:AR02	0.220351	12.5312	1.85709	0.0821327	0.245544	-4.71894
O43914	TYROBP	PMA:AR02	-0.624359	9.63223	-1.85678	0.0821794	0.245544	-4.71943
P55273	CDKN2D	PMA:AR02	0.374644	12.603	1.85659	0.0822081	0.245544	-4.71973
Q86YF9	DZIP1	PMA:AR02	-0.449455	15.187	-1.85574	0.0823351	0.245646	-4.72105
P61158	ACTR3	PMA:AR02	0.212604	18.5696	1.85533	0.0823972	0.245646	-4.72169
P19793	RXRA	PMA:AR02	0.181421	14.0709	1.85529	0.0824026	0.245646	-4.72175
P49368	CCT3	PMA:AR02	0.113875	16.6498	1.85483	0.0824713	0.245646	-4.72246
Q8NCJ5	SPRYD3	PMA:AR02	-0.439365	11.7372	-1.85456	0.0825127	0.245646	-4.72289
Q9UGJ1	TUBGCP4	PMA:AR02	0.44409	11.481	1.854	0.0825966	0.245646	-4.72376
Q9NWH9	SLTM	PMA:AR02	0.268587	12.0893	1.85396	0.0826023	0.245646	-4.72382
Q8N1F8	STK11IP	PMA:AR02	0.172562	12.5539	1.85396	0.0826025	0.245646	-4.72382
Q12933	TRAF2	PMA:AR02	0.286485	12.9291	1.85071	0.0830929	0.246724	-4.72888
Q7Z569	BRAP	PMA:AR02	-0.381022	11.0331	-1.85057	0.0831132	0.246724	-4.72909
Q15013	MAD2L1BP	PMA:AR02	0.968971	10.9107	1.85039	0.0831413	0.246724	-4.72938
Q99836	MYD88	PMA:AR02	0.247412	13.7888	1.85036	0.083146	0.246724	-4.72943
Q9NX00	TMEM160	PMA:AR02	0.41397	12.8348	1.85004	0.0831939	0.246732	-4.72992
O15525	MAFG	PMA:AR02	-0.194673	12.7751	-1.84907	0.0833406	0.246965	-4.73142
O75167	PHACTR2	PMA:AR02	0.428763	11.2793	1.84871	0.0833946	0.246965	-4.73198
Q9BWJ5	SF3B5	PMA:AR02	0.323712	11.7692	1.84862	0.0834084	0.246965	-4.73212
P68104	EEF1A1	PMA:AR02	0.266172	16.0036	1.84782	0.08353	0.247191	-4.73336
O43768	ENSA	PMA:AR02	-0.174947	14.8139	-1.84741	0.0835927	0.247242	-4.734
Q99961	SH3GL1	PMA:AR02	0.175111	14.9545	1.84651	0.0837289	0.247511	-4.73539
P35612	ADD2	PMA:AR02	-0.420971	12.8712	-1.84619	0.0837785	0.247523	-4.7359
Q13200	PSMD2	PMA:AR02	0.115203	15.0645	1.84518	0.0839326	0.247844	-4.73747
Q9UKR5	ERG28	PMA:AR02	0.295959	12.6487	1.84202	0.0844147	0.249133	-4.74236
Q13303	KCNAB2	PMA:AR02	0.157376	14.791	1.8417	0.0844636	0.249143	-4.74285
P29992	GNA11	PMA:AR02	-0.252222	15.0616	-1.84093	0.0845827	0.249239	-4.74405
Q8NE71	ABCF1	PMA:AR02	0.164045	16.6758	1.84066	0.0846232	0.249239	-4.74446
Q86WB0	ZC3HC1	PMA:AR02	0.20276	12.5652	1.8406	0.0846334	0.249239	-4.74456
Q5TCQ9	MAGI3	PMA:AR02	0.363509	13.1575	1.83983	0.0847522	0.249454	-4.74576
Q14980	NUMA1	PMA:AR02	0.194277	15.6464	1.83927	0.0848381	0.249572	-4.74663
O75146	HIP1R	PMA:AR02	0.267802	11.6738	1.83854	0.0849499	0.249696	-4.74775
P16949	STMN1	PMA:AR02	-0.17908	16.2004	-1.8384	0.0849717	0.249696	-4.74797
Q8N392	ARHGAP18	PMA:AR02	0.164834	13.0487	1.83559	0.0854053	0.250713	-4.75231
Q14161	GIT2	PMA:AR02	-0.193708	14.2337	-1.83555	0.0854124	0.250713	-4.75238
O60841	EIF5B	PMA:AR02	0.188702	12.7506	1.83527	0.0854556	0.250713	-4.75281
Q16658	FSCN1	PMA:AR02	0.234774	11.4192	1.83413	0.0856327	0.251079	-4.75457
Q92990	GLMN	PMA:AR02	0.199701	12.3038	1.83387	0.0856725	0.251079	-4.75497
Q8TDM6	DLG5	PMA:AR02	0.527761	12.6609	1.83356	0.0857215	0.251088	-4.75546
Q15185	PTGES3	PMA:AR02	-0.200782	14.8231	-1.833	0.0858077	0.251205	-4.75632
P33947	KDELR2	PMA:AR02	0.652426	10.2218	1.83145	0.0860491	0.251777	-4.75871
P12955	PEPD	PMA:AR02	0.294734	12.2674	1.83077	0.0861558	0.251954	-4.75977
O75179	ANKRD17	PMA:AR02	0.335245	11.2041	1.8294	0.0863699	0.252442	-4.76188
P49441	INPP1	PMA:AR02	-0.358148	11.9796	-1.82901	0.08643	0.252442	-4.76247
Q6P179	ERAP2	PMA:AR02	0.377701	11.4933	1.82881	0.0864615	0.252442	-4.76278
Q16626	MEA1	PMA:AR02	0.638207	9.86078	1.82718	0.0867176	0.253054	-4.7653
Q04721	NOTCH2	PMA:AR02	0.249666	11.6202	1.82653	0.0868193	0.253215	-4.7663
P10253	GAA	PMA:AR02	0.156843	13.2644	1.82485	0.0870832	0.253849	-4.76888
P61254	RPL26	PMA:AR02	-0.378042	15.3851	-1.82361	0.0872796	0.25421	-4.7708
Q05655	PRKCD	PMA:AR02	0.151772	16.2191	1.82339	0.0873133	0.25421	-4.77113
O95249	GOSR1	PMA:AR02	0.424729	12.2429	1.82318	0.0873467	0.25421	-4.77146
Q15149	PLEC	PMA:AR02	0.125238	15.5596	1.82275	0.0874154	0.254274	-4.77212
P49591	SARS1	PMA:AR02	0.212219	14.7197	1.82221	0.0875012	0.254388	-4.77296
Q13617	CUL2	PMA:AR02	0.137188	13.8467	1.82142	0.0876251	0.254612	-4.77416
P49137	MAPKAPK2	PMA:AR02	0.246035	13.7685	1.82076	0.0877308	0.254784	-4.77519
Q5VT66	MTARC1	PMA:AR02	0.252652	12.4653	1.82038	0.0877901	0.25482	-4.77577
Q9HC21	SLC25A19	PMA:AR02	-0.38982	10.6434	-1.81987	0.0878719	0.254922	-4.77656
O00499	BIN1	PMA:AR02	0.286268	11.5078	1.81909	0.0879951	0.255035	-4.77775
Q9UBT7	CTNNAL1	PMA:AR02	0.178707	13.7026	1.81871	0.0880555	0.255035	-4.77833
O75223	GGCT	PMA:AR02	0.226948	14.2728	1.81857	0.0880781	0.255035	-4.77855
Q6IPX3		PMA:AR02	0.472661	12.1396	1.81828	0.0881237	0.255035	-4.77899
Q8N680	ZBTB2	PMA:AR02	0.396888	11.2884	1.81815	0.0881447	0.255035	-4.77919
P46926	GNPDA1	PMA:AR02	0.173369	15.3105	1.8174	0.0882637	0.255109	-4.78034
P14618	PKM	PMA:AR02	0.159882	19.8471	1.8174	0.0882639	0.255109	-4.78034
Q86UV5	USP48	PMA:AR02	0.479607	11.1236	1.81703	0.0883235	0.255146	-4.78092
Q9HCD5	NCOA5	PMA:AR02	0.248441	12.3372	1.81578	0.0885231	0.255278	-4.78284
Q7Z7G8	VPS13B	PMA:AR02	0.392137	13.5936	1.81572	0.088533	0.255278	-4.78293
P98179	RBM3	PMA:AR02	0.347149	12.9107	1.81555	0.0885592	0.255278	-4.78318
Q9ULK4	MED23	PMA:AR02	0.210823	13.8197	1.81516	0.0886225	0.255278	-4.78379
Q9BY44	EIF2A	PMA:AR02	0.1732	12.3453	1.81507	0.0886366	0.255278	-4.78393
P78347	GTF2I	PMA:AR02	0.150833	12.8971	1.81499	0.0886498	0.255278	-4.78405
Q8N4P2	IFT70B	PMA:AR02	0.587347	10.6502	1.81456	0.0887188	0.255342	-4.78471
Q96DT6	ATG4C	PMA:AR02	0.392657	10.9634	1.81364	0.0888665	0.255632	-4.78613
P11274	BCR	PMA:AR02	0.137266	14.4682	1.81323	0.0889323	0.255686	-4.78676
Q14151	SAFB2	PMA:AR02	0.292945	12.7553	1.81276	0.0890076	0.255768	-4.78748
Q99759	MAP3K3	PMA:AR02	0.220453	13.8258	1.8113	0.0892424	0.256307	-4.78972
Q7Z401	DENND4A	PMA:AR02	0.271545	12.154	1.80897	0.0896172	0.257249	-4.79328
Q96P11	NSUN5	PMA:AR02	0.260132	12.0011	1.80738	0.0898754	0.257792	-4.79572
O15417	TNRC18	PMA:AR02	0.629872	14.2474	1.80722	0.089901	0.257792	-4.79596
Q9BYN0	SRXN1	PMA:AR02	0.229169	12.1245	1.80643	0.0900288	0.257962	-4.79717
O60341	KDM1A	PMA:AR02	0.196537	14.4999	1.80603	0.0900945	0.257962	-4.79779
Q9H4E7	DEF6	PMA:AR02	0.261596	15.2194	1.80598	0.0901021	0.257962	-4.79786
P16591	FER	PMA:AR02	0.191788	13.8789	1.80482	0.0902911	0.258367	-4.79964
Q9H944	MED20	PMA:AR02	-0.27296	11.3035	-1.80405	0.0904159	0.25854	-4.80081
Q9H9Z2	LIN28A	PMA:AR02	0.655267	9.91935	1.80386	0.0904464	0.25854	-4.8011
P56385	ATP5ME	PMA:AR02	0.216087	13.2204	1.80355	0.0904977	0.258551	-4.80158
Q0PNE2	ELP6	PMA:AR02	0.293189	11.3665	1.80194	0.0907603	0.259166	-4.80404
P30154	PPP2R1B	PMA:AR02	0.201363	12.2699	1.80134	0.0908582	0.259309	-4.80495
Q13451	FKBP5	PMA:AR02	0.218729	16.5969	1.8005	0.0909963	0.259553	-4.80624
P19404	NDUFV2	PMA:AR02	0.238006	14.3962	1.80024	0.0910385	0.259553	-4.80663
P61964	WDR5	PMA:AR02	0.231285	13.2916	1.79972	0.0911242	0.259623	-4.80743
P42566	EPS15	PMA:AR02	0.170004	14.3713	1.79914	0.0912186	0.259623	-4.80831
Q9BY50	SEC11C	PMA:AR02	0.252419	12.2052	1.79914	0.0912192	0.259623	-4.80832
P61421	ATP6V0D1	PMA:AR02	0.194369	14.9403	1.79877	0.0912798	0.259623	-4.80888
Q9P0M6	MACROH2A2	PMA:AR02	-0.278003	14.1428	-1.79853	0.0913197	0.259623	-4.80925
Q8WUY1	THEM6	PMA:AR02	0.349349	12.8891	1.79835	0.0913488	0.259623	-4.80952
P05141	SLC25A5	PMA:AR02	-0.15353	17.3207	-1.79772	0.0914516	0.25978	-4.81047
P61019	RAB2A	PMA:AR02	0.294183	15.0731	1.797	0.09157	0.259981	-4.81157
O95163	ELP1	PMA:AR02	0.191285	11.9604	1.79628	0.0916888	0.260133	-4.81267
Q05682	CALD1	PMA:AR02	-0.270309	12.2867	-1.7961	0.0917189	0.260133	-4.81295
Q6P1X6	C8orf82	PMA:AR02	-0.541472	9.75878	-1.79456	0.0919732	0.260654	-4.8153
Q8WWW0	RASSF5	PMA:AR02	-0.16042	14.2957	-1.79441	0.0919984	0.260654	-4.81553
P25963	NFKBIA	PMA:AR02	0.486812	10.0669	1.79351	0.0921465	0.260718	-4.81689
P51798	CLCN7	PMA:AR02	0.183266	13.1948	1.79346	0.0921549	0.260718	-4.81697
Q96DB5	RMDN1	PMA:AR02	0.27253	13.8319	1.7932	0.092199	0.260718	-4.81737
Q6Y7W6	GIGYF2	PMA:AR02	0.236981	12.0088	1.79312	0.0922122	0.260718	-4.8175
Q9Y3B3	TMED7	PMA:AR02	0.351811	13.4055	1.79038	0.0926662	0.261866	-4.82166
Q15572	TAF1C	PMA:AR02	0.350741	13.3275	1.79001	0.0927287	0.261907	-4.82223
Q9BXW7	HDHD5	PMA:AR02	0.298425	11.609	1.78906	0.0928872	0.262109	-4.82367
Q7Z333	SETX	PMA:AR02	0.28713	11.237	1.789	0.0928963	0.262109	-4.82376
Q9Y228	TRAF3IP3	PMA:AR02	0.226179	13.7308	1.78739	0.0931649	0.262731	-4.8262
O43707	ACTN4	PMA:AR02	0.182602	17.6206	1.78665	0.0932896	0.262815	-4.82733
Q6R327	RICTOR	PMA:AR02	0.265649	11.2415	1.78664	0.0932912	0.262815	-4.82735
Q9UBS0	RPS6KB2	PMA:AR02	0.236979	11.768	1.78583	0.0934273	0.263063	-4.82858
Q8NHQ9	DDX55	PMA:AR02	0.329397	10.3931	1.78407	0.0937215	0.263755	-4.83124
Q86YP4	GATAD2A	PMA:AR02	0.225818	13.3754	1.78328	0.0938555	0.263996	-4.83245
Q96F24	NRBF2	PMA:AR02	-0.173132	15.3144	-1.7827	0.0939534	0.264135	-4.83334
P02042	HBD	PMA:AR02	-0.274587	20.9756	-1.78203	0.094065	0.264312	-4.83434
Q9BZG1	RAB34	PMA:AR02	-0.163822	12.4303	-1.78106	0.0942303	0.264561	-4.83583
Q9HBL8	NMRAL1	PMA:AR02	0.485054	11.3165	1.78094	0.0942505	0.264561	-4.83601
Q15034	HERC3	PMA:AR02	-0.256184	12.0988	-1.78059	0.0943094	0.26459	-4.83654
P29590	PML	PMA:AR02	0.174112	14.4175	1.78029	0.0943593	0.264594	-4.83698
Q13733	ATP1A4	PMA:AR02	0.226736	14.7048	1.77955	0.0944857	0.264744	-4.83811
P06127	CD5	PMA:AR02	0.277838	12.0549	1.7794	0.0945097	0.264744	-4.83833
Q9HC38	GLOD4	PMA:AR02	0.14319	14.8006	1.77723	0.0948776	0.265482	-4.84161
Q76FK4	NOL8	PMA:AR02	0.424285	12.9862	1.77712	0.0948967	0.265482	-4.84179
Q9Y251	HPSE	PMA:AR02	0.277538	10.8432	1.77699	0.0949191	0.265482	-4.84199
P07108	DBI	PMA:AR02	0.269882	15.9271	1.77658	0.0949895	0.265525	-4.84261
Q16864	ATP6V1F	PMA:AR02	0.312409	12.7149	1.77613	0.0950662	0.265525	-4.84329
O95749	GGPS1	PMA:AR02	-0.264554	12.8811	-1.77604	0.0950806	0.265525	-4.84342
P60520	GABARAPL2	PMA:AR02	0.217832	13.4003	1.77537	0.0951949	0.265535	-4.84444
P52789	HK2	PMA:AR02	0.154941	14.6381	1.77536	0.0951958	0.265535	-4.84445
Q9Y2U8	LEMD3	PMA:AR02	0.290499	11.2576	1.77487	0.09528	0.265535	-4.84519
P55072	VCP	PMA:AR02	0.14851	16.7173	1.77443	0.0953549	0.265535	-4.84586
P55884	EIF3B	PMA:AR02	0.203113	15.0114	1.77424	0.095387	0.265535	-4.84614
Q13459	MYO9B	PMA:AR02	0.140572	16.2176	1.77404	0.0954213	0.265535	-4.84645
Q9H0U6	MRPL18	PMA:AR02	0.379071	10.9319	1.77402	0.0954253	0.265535	-4.84648
O95487	SEC24B	PMA:AR02	0.163687	12.6966	1.77285	0.0956248	0.265868	-4.84825
Q8WZA0	LZIC	PMA:AR02	-0.253094	14.7253	-1.77264	0.0956614	0.265868	-4.84857
Q16512	PKN1	PMA:AR02	0.240729	15.2013	1.77222	0.0957334	0.265868	-4.8492
Q6IN85	PPP4R3A	PMA:AR02	0.208563	12.7391	1.7721	0.0957536	0.265868	-4.84938
Q9Y383	LUC7L2	PMA:AR02	0.147737	14.6166	1.7719	0.0957886	0.265868	-4.84969
Q9Y6V7	DDX49	PMA:AR02	0.564071	9.04266	1.77107	0.0959299	0.265963	-4.85094
O14976	GAK	PMA:AR02	0.155659	14.0207	1.77083	0.0959722	0.265963	-4.85131
Q08AF3	SLFN5	PMA:AR02	0.183667	12.6371	1.77077	0.0959812	0.265963	-4.85139
Q7L2J0	MEPCE	PMA:AR02	0.472666	11.7108	1.77056	0.0960177	0.265963	-4.85171
P01834		PMA:AR02	0.376294	13.8527	1.7688	0.0963203	0.266648	-4.85437
Q8IWE5	PLEKHM2	PMA:AR02	0.414675	11.3612	1.76839	0.0963915	0.266648	-4.85499
Q9NP58	ABCB6	PMA:AR02	0.276238	14.8979	1.76817	0.0964295	0.266648	-4.85532
P49674	CSNK1E	PMA:AR02	0.364464	12.3291	1.7679	0.0964754	0.266648	-4.85572
O75592	MYCBP2	PMA:AR02	0.123555	13.0436	1.7677	0.0965097	0.266648	-4.85602
Q9Y2E5	MAN2B2	PMA:AR02	0.160565	13.3428	1.76596	0.0968109	0.267345	-4.85866
Q9BT78	COPS4	PMA:AR02	0.114415	13.9797	1.76552	0.0968863	0.267418	-4.85931
Q9H3S7	PTPN23	PMA:AR02	0.176424	12.9624	1.76479	0.0970136	0.267634	-4.86042
P55212	CASP6	PMA:AR02	0.1704	13.1922	1.76436	0.0970877	0.267689	-4.86106
Q9H0E2	TOLLIP	PMA:AR02	0.241581	14.6858	1.76394	0.0971599	0.267689	-4.86169
Q70J99	UNC13D	PMA:AR02	0.227974	16.0773	1.76382	0.0971809	0.267689	-4.86187
Q9Y4L1	HYOU1	PMA:AR02	0.166163	14.4806	1.76229	0.0974475	0.268288	-4.86419
P01861		PMA:AR02	0.744868	11.8273	1.7615	0.0975846	0.268503	-4.86537
Q9Y286	SIGLEC7	PMA:AR02	0.535416	9.58981	1.76127	0.0976241	0.268503	-4.86571
P13473	LAMP2	PMA:AR02	0.421295	17.1939	1.76009	0.0978309	0.268735	-4.8675
O60508	CDC40	PMA:AR02	-0.210246	12.1212	-1.75995	0.0978557	0.268735	-4.86771
Q9Y484	WDR45	PMA:AR02	0.230687	12.3757	1.75994	0.0978562	0.268735	-4.86772
Q8N4P3	HDDC3	PMA:AR02	0.34005	11.0114	1.7596	0.0979156	0.268763	-4.86823
Q86TI2	DPP9	PMA:AR02	0.138639	13.4598	1.75914	0.0979963	0.268849	-4.86892
Q5JTH9	RRP12	PMA:AR02	0.301963	11.1448	1.75866	0.0980803	0.268944	-4.86964
P25208	NFYB	PMA:AR02	-0.157873	12.9381	-1.75816	0.0981682	0.26905	-4.8704
P24666	ACP1	PMA:AR02	-0.214157	15.83	-1.75619	0.098513	0.269644	-4.87335
O60437	PPL	PMA:AR02	-0.157294	13.6661	-1.75617	0.0985171	0.269644	-4.87339
P0DP23	CALM1	PMA:AR02	-0.403835	17.0994	-1.75608	0.0985334	0.269644	-4.87353
Q9UKW4	VAV3	PMA:AR02	0.262055	12.8051	1.75561	0.0986154	0.269733	-4.87423
O75676	RPS6KA4	PMA:AR02	0.411029	12.1951	1.75454	0.0988028	0.270111	-4.87583
P09012	SNRPA	PMA:AR02	0.243958	14.2624	1.75365	0.0989599	0.270398	-4.87717
P17535	JUND	PMA:AR02	0.431743	10.3992	1.75333	0.0990174	0.270398	-4.87766
Q9UK39	NOCT	PMA:AR02	0.282255	11.3507	1.7531	0.0990567	0.270398	-4.87799
Q12959	DLG1	PMA:AR02	0.256831	11.7461	1.75226	0.0992055	0.270669	-4.87926
[truncated: 3,455 more rows]

## Sheet: PMA_SMES
accession	gene_symbol	coef	logFC	AveExpr	t	P.Value	adj.P.Val	B
A1L020	MEX3A	PMA:SMES	1.17517	13.7852	7.83822	8.11385e-07	0.00442529	3.82809
Q9Y6W5	WASF2	PMA:SMES	-0.682779	14.2348	-5.31119	7.44974e-05	0.203154	1.01944
Q99848	EBNA1BP2	PMA:SMES	1.39409	11.1326	4.7276	0.000238304	0.307421	0.207741
Q15056	EIF4H	PMA:SMES	-1.38449	12.6328	-4.72226	0.000240896	0.307421	0.200045
Q99733	NAP1L4	PMA:SMES	-0.67106	14.5874	-4.63292	0.000288809	0.307421	0.0706177
Q75N03	CBLL1	PMA:SMES	-0.990755	10.5497	-4.55548	0.000338197	0.307421	-0.0425818
Q02539	H1-1	PMA:SMES	1.10527	15.9845	4.34427	0.000521643	0.359129	-0.355913
Q8WVK2	SNRNP27	PMA:SMES	-0.966056	10.8482	-4.28897	0.000584672	0.359129	-0.438994
P14317	HCLS1	PMA:SMES	-0.492648	16.6808	-4.22682	0.000664846	0.359129	-0.532878
O75396	SEC22B	PMA:SMES	-0.513917	14.0703	-4.22068	0.00067335	0.359129	-0.542179
Q9Y3B9	RRP15	PMA:SMES	-0.620141	13.3913	-4.14853	0.000781964	0.359129	-0.651843
P02686	MBP	PMA:SMES	-1.10434	12.3247	-4.09248	0.000878486	0.359129	-0.737464
P30273	FCER1G	PMA:SMES	-0.88811	16.521	-4.08442	0.000893331	0.359129	-0.74981
Q9UHR5	SAP30BP	PMA:SMES	-0.594621	11.6436	-4.06931	0.000921856	0.359129	-0.772981
P42167	TMPO	PMA:SMES	-0.458623	16.836	-4.00839	0.00104649	0.380503	-0.866625
P18583	SON	PMA:SMES	-0.482586	13.868	-3.91119	0.0012817	0.411399	-1.01689
Q9P0R6	GSKIP	PMA:SMES	-0.819446	12.5242	-3.91095	0.00128232	0.411399	-1.01725
P42166	TMPO	PMA:SMES	-0.326062	14.3843	-3.77532	0.0017027	0.497275	-1.22843
Q13442	PDAP1	PMA:SMES	-0.725694	13.6557	-3.76359	0.00174503	0.497275	-1.24677
Q5HYW2		PMA:SMES	-0.46936	13.2177	-3.73785	0.00184163	0.497275	-1.28705
Q9Y4F1	FARP1	PMA:SMES	0.528914	13.3049	3.70857	0.0019581	0.497275	-1.33293
P48730	CSNK1D	PMA:SMES	0.316282	12.2445	3.69706	0.00200588	0.497275	-1.35099
P55036	PSMD4	PMA:SMES	-0.389904	13.6979	-3.64846	0.00222088	0.506732	-1.42732
Q96A49	SYAP1	PMA:SMES	-0.585433	10.5659	-3.61731	0.00237068	0.506732	-1.47632
Q8WW12	PCNP	PMA:SMES	-0.502539	13.5661	-3.6008	0.00245415	0.506732	-1.50232
Q9BZI7	UPF3B	PMA:SMES	-0.557231	11.306	-3.59395	0.00248962	0.506732	-1.51311
Q9P021	CRIPT	PMA:SMES	-0.707871	12.2898	-3.59033	0.00250858	0.506732	-1.51881
Q14692	BMS1	PMA:SMES	0.728151	9.71522	3.56858	0.00262561	0.51143	-1.5531
Q9UQ35	SRRM2	PMA:SMES	-0.333456	13.2479	-3.52235	0.00289272	0.525204	-1.62603
O60784	TOM1	PMA:SMES	-0.399807	14.7884	-3.4904	0.00309308	0.525204	-1.67651
Q68D10	SPTY2D1	PMA:SMES	-0.843368	11.0867	-3.48279	0.00314277	0.525204	-1.68853
Q92615	LARP4B	PMA:SMES	0.575023	13.1175	3.47757	0.00317733	0.525204	-1.69678
O60268	KIAA0513	PMA:SMES	-0.766634	13.1684	-3.4775	0.0031778	0.525204	-1.69689
Q8WUH6	TMEM263	PMA:SMES	-0.680821	11.5619	-3.45637	0.00332165	0.531421	-1.7303
P37840	SNCA	PMA:SMES	-0.472713	12.4628	-3.4284	0.00352216	0.531421	-1.77456
P41236	PPP1R2	PMA:SMES	-0.411498	13.1032	-3.41741	0.00360419	0.531421	-1.79195
Q8WZA0	LZIC	PMA:SMES	-0.487913	14.7253	-3.41728	0.00360517	0.531421	-1.79216
Q8WUA4	GTF3C2	PMA:SMES	-0.587073	12.1434	-3.38651	0.00384511	0.551875	-1.84086
Q9BV68	RNF126	PMA:SMES	0.40788	13.2246	3.35212	0.00413218	0.577869	-1.89533
P82979	SARNP	PMA:SMES	-0.55723	15.2173	-3.30506	0.00455981	0.62173	-1.9699
Q9NUP1	BLOC1S4	PMA:SMES	-0.751615	12.771	-3.27493	0.00485624	0.645999	-2.01763
P07766	CD3E	PMA:SMES	-0.611429	10.6552	-3.2467	0.0051514	0.668946	-2.06238
O95544	NADK	PMA:SMES	-0.404044	15.1745	-3.22817	0.00535466	0.67917	-2.09174
Q6UWP2	DHRS11	PMA:SMES	0.65675	11.0992	3.20512	0.00561874	0.695472	-2.12827
Q14677	CLINT1	PMA:SMES	-0.484901	13.0743	-3.19503	0.00573821	0.695472	-2.14424
O15525	MAFG	PMA:SMES	-0.329295	12.7751	-3.12776	0.00660212	0.782781	-2.25077
Q9H2C0	GAN	PMA:SMES	-0.697752	12.8973	-3.1126	0.00681378	0.790689	-2.27476
P30049	ATP5F1D	PMA:SMES	-0.356273	14.1717	-3.0705	0.00743742	0.83941	-2.34134
O95685	PPP1R3D	PMA:SMES	-0.41419	13.0608	-3.06381	0.00754145	0.83941	-2.35191
E9PAV3		PMA:SMES	-0.42816	14.2882	-3.04396	0.00785886	0.857244	-2.38327
B7ZAP0	RABGAP1L	PMA:SMES	-0.723163	11.0779	-3.01714	0.00830869	0.888541	-2.42561
P25208	NFYB	PMA:SMES	-0.268901	12.9381	-2.99462	0.00870574	0.90856	-2.46113
Q9H0F7	ARL6	PMA:SMES	-0.623185	9.87562	-2.9756	0.00905565	0.90856	-2.49112
Q99102	MUC4	PMA:SMES	1.05123	14.7511	2.97542	0.00905905	0.90856	-2.49141
Q99590	SCAF11	PMA:SMES	-0.800473	10.7077	-2.96995	0.00916223	0.90856	-2.50003
O14979	HNRNPDL	PMA:SMES	-0.286559	16.6548	-2.942	0.00970752	0.909164	-2.54403
Q00765	REEP5	PMA:SMES	-0.294111	15.4827	-2.94083	0.00973094	0.909164	-2.54587
O00151	PDLIM1	PMA:SMES	-0.254527	14.5783	-2.93198	0.00991057	0.909164	-2.55979
Q14847	LASP1	PMA:SMES	-0.323404	16.4444	-2.92949	0.00996168	0.909164	-2.5637
O75132	ZBED4	PMA:SMES	0.412034	15.0348	2.92754	0.0100018	0.909164	-2.56676
Q9BY77	POLDIP3	PMA:SMES	-0.356791	11.8031	-2.89346	0.0107307	0.951296	-2.62032
O95671	ASMTL	PMA:SMES	0.243288	12.6768	2.8897	0.0108141	0.951296	-2.62621
Q9BVK8	TMEM147	PMA:SMES	-0.390166	12.5258	-2.87769	0.0110851	0.959649	-2.64505
O00159	MYO1C	PMA:SMES	0.740051	13.3484	2.85192	0.011689	0.963366	-2.68544
O95168	NDUFB4	PMA:SMES	0.286897	13.8008	2.85103	0.0117105	0.963366	-2.68683
Q6UN15	FIP1L1	PMA:SMES	-0.509605	12.9736	-2.84043	0.0119686	0.963366	-2.70343
Q71RG4	TMUB2	PMA:SMES	-0.784615	10.054	-2.83136	0.0121939	0.963366	-2.71762
P42898	MTHFR	PMA:SMES	-0.382732	11.2781	-2.82615	0.0123249	0.963366	-2.72576
Q96DE0	NUDT16	PMA:SMES	-0.294802	13.4527	-2.81805	0.0125318	0.963366	-2.73843
P49790	NUP153	PMA:SMES	-0.259863	13.9198	-2.81743	0.0125476	0.963366	-2.73939
Q76I76	SSH2	PMA:SMES	-0.631771	11.1294	-2.81298	0.0126628	0.963366	-2.74635
Q99856	ARID3A	PMA:SMES	-0.340841	12.3716	-2.80668	0.0128276	0.963366	-2.75619
Q66LE6	PPP2R2D	PMA:SMES	-0.453131	12.3917	-2.79778	0.0130638	0.963366	-2.77007
Q9ULD2	MTUS1	PMA:SMES	0.47033	11.9803	2.79628	0.013104	0.963366	-2.77241
O94906	PRPF6	PMA:SMES	-0.213403	13.2347	-2.78986	0.0132775	0.963366	-2.78243
Q9Y2E5	MAN2B2	PMA:SMES	-0.252618	13.3428	-2.7784	0.013593	0.963366	-2.8003
P53677	AP3M2	PMA:SMES	-0.524948	13.7769	-2.77812	0.0136009	0.963366	-2.80074
Q9HAU4	SMURF2	PMA:SMES	0.3254	17.4675	2.76832	0.0138765	0.970287	-2.81601
O43290	SART1	PMA:SMES	-0.380823	12.4632	-2.76122	0.0140796	0.972024	-2.82706
Q641Q2	WASHC2A	PMA:SMES	-0.348044	11.9606	-2.74766	0.0144751	0.986843	-2.84815
Q9Y2R2	PTPN22	PMA:SMES	-0.541522	10.91	-2.73257	0.0149284	0.999313	-2.8716
Q9UBD5	ORC3	PMA:SMES	-0.623599	10.3392	-2.72568	0.0151398	0.999313	-2.8823
Q9ULE0	WWC3	PMA:SMES	-1.08789	10.3329	-2.69861	0.0159986	0.999313	-2.92427
Q8TDB6	DTX3L	PMA:SMES	-0.279313	12.6626	-2.69576	0.0160918	0.999313	-2.92868
O43586	PSTPIP1	PMA:SMES	-0.596262	11.37	-2.6935	0.016166	0.999313	-2.93218
Q96PK6	RBM14	PMA:SMES	-0.265588	14.6486	-2.6837	0.0164915	0.999313	-2.94734
Q6YHU6	THADA	PMA:SMES	0.563733	13.4337	2.68158	0.0165629	0.999313	-2.95063
O60888	CUTA	PMA:SMES	-0.465194	16.161	-2.67563	0.0167645	0.999313	-2.95982
O43719	HTATSF1	PMA:SMES	-0.761136	10.7797	-2.67295	0.0168559	0.999313	-2.96396
O96005	CLPTM1	PMA:SMES	-0.351413	11.9084	-2.66941	0.0169777	0.999313	-2.96943
P35237	SERPINB6	PMA:SMES	-0.245514	14.5952	-2.66863	0.0170044	0.999313	-2.97063
Q15717	ELAVL1	PMA:SMES	-0.347989	14.513	-2.65873	0.0173499	0.999313	-2.98592
P61923	COPZ1	PMA:SMES	-0.759183	13.0811	-2.65716	0.0174053	0.999313	-2.98834
Q6WKZ4	RAB11FIP1	PMA:SMES	-0.230181	15.8414	-2.64911	0.017692	0.999313	-3.00075
P41229	KDM5C	PMA:SMES	0.455857	13.2508	2.64377	0.0178847	0.999313	-3.00899
O43914	TYROBP	PMA:SMES	-0.886322	9.63223	-2.63584	0.0181745	0.999313	-3.0212
A4D1P6	WDR91	PMA:SMES	-0.248653	13.8124	-2.6276	0.0184802	0.999313	-3.03387
Q9UBT7	CTNNAL1	PMA:SMES	0.257616	13.7026	2.62177	0.0186997	0.999313	-3.04284
Q9Y3C0	WASHC3	PMA:SMES	-0.475581	12.4071	-2.59164	0.0198739	0.999313	-3.08909
Q15233	NONO	PMA:SMES	-0.267596	15.1196	-2.58619	0.0200937	0.999313	-3.09744
P35030	PRSS3	PMA:SMES	0.478112	12.944	2.5837	0.0201951	0.999313	-3.10126
Q969Q4	ARL11	PMA:SMES	-0.353111	12.2629	-2.57412	0.0205887	0.999313	-3.11591
P52333	JAK3	PMA:SMES	0.413623	11.2912	2.57285	0.0206418	0.999313	-3.11787
P98175	RBM10	PMA:SMES	-0.311428	13.259	-2.57253	0.0206549	0.999313	-3.11835
Q7Z422	SZRD1	PMA:SMES	-0.402389	11.5571	-2.57104	0.0207169	0.999313	-3.12063
Q2TAZ0	ATG2A	PMA:SMES	-0.477128	12.3367	-2.56157	0.021116	0.999313	-3.1351
P35611	ADD1	PMA:SMES	-0.208236	15.3593	-2.5558	0.0213628	0.999313	-3.14392
O14874	BCKDK	PMA:SMES	0.560039	10.0097	2.5526	0.0215008	0.999313	-3.14881
Q9H3G5	CPVL	PMA:SMES	0.449284	12.569	2.54113	0.0220022	0.999313	-3.16629
Q9HCK8	CHD8	PMA:SMES	0.418532	11.6518	2.53612	0.022225	0.999313	-3.17393
P13727	PRG2	PMA:SMES	0.531558	19.7048	2.53307	0.0223614	0.999313	-3.17857
Q5T1J5		PMA:SMES	-0.594089	12.194	-2.5308	0.0224635	0.999313	-3.18202
O43913	ORC5	PMA:SMES	-0.586495	10.8169	-2.52789	0.0225951	0.999313	-3.18645
Q9UBS8	RNF14	PMA:SMES	0.47531	11.4086	2.52612	0.0226757	0.999313	-3.18915
P62753	RPS6	PMA:SMES	-0.504161	17.289	-2.52557	0.0227009	0.999313	-3.18999
Q9H4X1	RGCC	PMA:SMES	-0.720433	8.6469	-2.51742	0.0230747	0.999313	-3.20237
P30419	NMT1	PMA:SMES	-0.231466	13.8663	-2.50144	0.0238256	0.999313	-3.22664
Q8TF05	PPP4R1	PMA:SMES	-0.241585	14.7992	-2.49998	0.0238953	0.999313	-3.22885
P46783	RPS10	PMA:SMES	-0.250764	15.2419	-2.4962	0.0240765	0.999313	-3.23457
Q96D53	COQ8B	PMA:SMES	0.434328	11.1145	2.49098	0.0243293	0.999313	-3.24249
Q8TEU7	RAPGEF6	PMA:SMES	-0.274896	11.8984	-2.47567	0.0250855	0.999313	-3.26566
Q8IWZ8	SUGP1	PMA:SMES	-0.335685	11.8298	-2.46636	0.0255556	0.999313	-3.27972
Q15628	TRADD	PMA:SMES	-0.325409	13.2265	-2.45918	0.025924	0.999313	-3.29055
Q9UHD8	SEPTIN9	PMA:SMES	-0.169353	15.9718	-2.45791	0.0259899	0.999313	-3.29247
Q49AM3	TTC31	PMA:SMES	0.329425	16.9648	2.45301	0.026245	0.999313	-3.29986
Q9NT62	ATG3	PMA:SMES	-0.422769	14.3298	-2.44959	0.0264241	0.999313	-3.30501
Q9HCD5	NCOA5	PMA:SMES	0.335042	12.3372	2.44872	0.02647	0.999313	-3.30632
Q9GZY8	MFF	PMA:SMES	-0.465773	11.834	-2.44858	0.0264773	0.999313	-3.30652
P48723	HSPA13	PMA:SMES	-0.431686	11.9962	-2.44787	0.0265147	0.999313	-3.30759
P16220	CREB1	PMA:SMES	-0.345747	13.6518	-2.44373	0.0267341	0.999313	-3.31383
O14974	PPP1R12A	PMA:SMES	-0.323657	15.4904	-2.44298	0.0267742	0.999313	-3.31496
Q49A26	GLYR1	PMA:SMES	-0.198223	14.9379	-2.43624	0.0271358	0.999313	-3.3251
Q86XX4	FRAS1	PMA:SMES	0.734579	13.2872	2.43588	0.027155	0.999313	-3.32564
P62857	RPS28	PMA:SMES	-0.487042	12.0855	-2.4344	0.0272352	0.999313	-3.32787
Q9NYF8	BCLAF1	PMA:SMES	-0.274491	13.3507	-2.43426	0.0272426	0.999313	-3.32807
Q9UBP0	SPAST	PMA:SMES	-0.254862	12.9615	-2.43167	0.0273831	0.999313	-3.33196
Q96S44	TP53RK	PMA:SMES	0.368064	13.1972	2.4217	0.0279309	0.999313	-3.34693
Q9Y256	RCE1	PMA:SMES	-0.43721	10.944	-2.42031	0.0280083	0.999313	-3.34903
Q9Y314	NOSIP	PMA:SMES	-0.298609	11.8659	-2.41924	0.028068	0.999313	-3.35064
O75030	MITF	PMA:SMES	0.457027	14.3634	2.4054	0.0288486	0.999313	-3.37136
Q9H7B2	RPF2	PMA:SMES	-0.506037	9.89235	-2.40326	0.0289712	0.999313	-3.37456
P16083	NQO2	PMA:SMES	-0.379855	14.0932	-2.39923	0.0292035	0.999313	-3.3806
Q14318	FKBP8	PMA:SMES	-0.292569	14.1062	-2.39787	0.0292823	0.999313	-3.38263
Q8NFC6	BOD1L1	PMA:SMES	-0.31649	12.8862	-2.39473	0.0294648	0.999313	-3.38732
Q6BCY4	CYB5R2	PMA:SMES	0.623943	12.1323	2.38863	0.0298231	0.999313	-3.39645
Q96B97	SH3KBP1	PMA:SMES	-0.244991	16.3619	-2.38529	0.0300207	0.999313	-3.40143
Q9BZL6	PRKD2	PMA:SMES	-0.218995	12.3099	-2.38214	0.0302081	0.999313	-3.40613
Q96MH6	TMEM68	PMA:SMES	-0.564528	12.5387	-2.38083	0.0302861	0.999313	-3.40807
O15550	KDM6A	PMA:SMES	-0.837973	11.4407	-2.37496	0.0306397	0.999313	-3.41683
Q9Y3T6	R3HCC1	PMA:SMES	0.268081	12.7602	2.36663	0.0311473	0.999313	-3.42923
Q96MX0	CMTM3	PMA:SMES	0.483345	11.9938	2.36411	0.0313029	0.999313	-3.43299
Q7Z5R6	APBB1IP	PMA:SMES	-0.243071	15.5421	-2.3538	0.0319454	0.999313	-3.4483
Q04941	PLP2	PMA:SMES	-1.04467	12.4916	-2.33879	0.0329035	0.999313	-3.47057
Q86SG5	S100A7A	PMA:SMES	0.865112	9.86413	2.3349	0.033156	0.999313	-3.47633
O95218	ZRANB2	PMA:SMES	-0.304136	12.7031	-2.33334	0.033258	0.999313	-3.47865
Q16777	H2AC20	PMA:SMES	-0.785498	14.2986	-2.33225	0.0333288	0.999313	-3.48025
Q6NYC8	PPP1R18	PMA:SMES	-0.364263	13.8392	-2.32863	0.0335668	0.999313	-3.48561
P02794	FTH1	PMA:SMES	0.31218	12.6228	2.32228	0.0339881	0.999313	-3.495
Q9NRZ7	AGPAT3	PMA:SMES	0.359241	11.0312	2.32207	0.0340018	0.999313	-3.4953
P09651	HNRNPA1	PMA:SMES	-0.265904	17.2417	-2.32124	0.0340571	0.999313	-3.49652
P11234	RALB	PMA:SMES	0.18163	15.0521	2.31646	0.0343784	0.999313	-3.50359
Q96JY6	PDLIM2	PMA:SMES	-0.34208	13.2374	-2.31142	0.0347197	0.999313	-3.51103
O43768	ENSA	PMA:SMES	-0.218875	14.8139	-2.31128	0.0347289	0.999313	-3.51123
Q9BQ04	RBM4B	PMA:SMES	-0.219872	13.9089	-2.31105	0.034745	0.999313	-3.51158
Q6PKG0	LARP1	PMA:SMES	-0.290929	12.7139	-2.31096	0.0347512	0.999313	-3.51171
O95759	TBC1D8	PMA:SMES	0.355385	10.8849	2.30729	0.0350019	0.999313	-3.51712
P32519	ELF1	PMA:SMES	-0.39055	11.838	-2.30703	0.0350194	0.999313	-3.51749
O43815	STRN	PMA:SMES	-0.229506	16.0611	-2.30082	0.0354477	0.999313	-3.52664
Q9NRY5	FAM114A2	PMA:SMES	-0.211443	13.5472	-2.30002	0.0355033	0.999313	-3.52782
Q9NXE8	CWC25	PMA:SMES	-0.495257	10.399	-2.29898	0.0355756	0.999313	-3.52935
Q9NQT5	EXOSC3	PMA:SMES	-0.302172	11.4666	-2.29553	0.0358166	0.999313	-3.53442
Q5T5C0	STXBP5	PMA:SMES	-0.225051	14.236	-2.29392	0.03593	0.999313	-3.5368
Q15645	TRIP13	PMA:SMES	0.214575	12.8213	2.28929	0.0362563	0.999313	-3.5436
Q5T160	RARS2	PMA:SMES	-0.722451	9.66533	-2.28605	0.0364864	0.999313	-3.54835
O43759	SYNGR1	PMA:SMES	-0.241764	14.284	-2.27545	0.0372496	0.999313	-3.56391
O14828	SCAMP3	PMA:SMES	-0.540625	12.4449	-2.27366	0.03738	0.999313	-3.56653
Q9Y5K6	CD2AP	PMA:SMES	-0.240057	13.7791	-2.27271	0.0374492	0.999313	-3.56792
P52272	HNRNPM	PMA:SMES	-0.175351	17.4516	-2.26543	0.0379846	0.999313	-3.57858
Q7L211	ABHD13	PMA:SMES	0.622934	10.3753	2.26071	0.0383352	0.999313	-3.58548
Q9H479	FN3K	PMA:SMES	0.395088	11.1438	2.25145	0.0390322	0.999313	-3.599
P50402	EMD	PMA:SMES	-0.254976	13.0471	-2.24987	0.0391523	0.999313	-3.60131
Q8IXJ9	ASXL1	PMA:SMES	0.872608	13.0128	2.24963	0.0391703	0.999313	-3.60165
Q9UBI9	HECA	PMA:SMES	0.334266	10.8189	2.24818	0.0392815	0.999313	-3.60378
Q9UJX3	ANAPC7	PMA:SMES	0.438611	12.4131	2.24504	0.0395218	0.999313	-3.60835
Q8N4C8	MINK1	PMA:SMES	0.249938	13.0822	2.24427	0.039581	0.999313	-3.60947
Q7L0Y3	TRMT10C	PMA:SMES	-0.341159	12.2342	-2.2437	0.0396248	0.999313	-3.6103
Q9NQE9	HINT3	PMA:SMES	-0.368739	12.4739	-2.24153	0.0397922	0.999313	-3.61347
Q5JS37	NHLRC3	PMA:SMES	-0.286643	12.8197	-2.23779	0.0400818	0.999313	-3.6189
Q92844	TANK	PMA:SMES	-0.335995	12.7959	-2.2365	0.0401825	0.999313	-3.62078
Q6NXR4	TTI2	PMA:SMES	0.36494	12.1113	2.23473	0.0403212	0.999313	-3.62337
Q7Z2Z1	TICRR	PMA:SMES	0.623019	14.0943	2.23312	0.0404471	0.999313	-3.6257
Q96NB3	ZNF830	PMA:SMES	-0.502375	10.4439	-2.23022	0.0406753	0.999313	-3.62992
Q9BZ67	FRMD8	PMA:SMES	-0.317071	11.6005	-2.22916	0.0407586	0.999313	-3.63145
Q9Y3X0	CCDC9	PMA:SMES	-0.383373	12.4069	-2.2252	0.0410729	0.999313	-3.63721
Q8WTT2	NOC3L	PMA:SMES	-0.503495	10.5265	-2.22376	0.0411876	0.999313	-3.6393
Q9HBL7	PLGRKT	PMA:SMES	-0.271185	13.1975	-2.22249	0.0412894	0.999313	-3.64115
Q96EV8	DTNBP1	PMA:SMES	-0.717784	10.5029	-2.21955	0.0415248	0.999313	-3.64541
Q13286	CLN3	PMA:SMES	0.452001	11.9067	2.21689	0.0417393	0.999313	-3.64927
Q96AH0	NABP1	PMA:SMES	0.339135	12.0454	2.20738	0.0425144	0.999313	-3.66304
Q9Y508	RNF114	PMA:SMES	-0.574343	11.1549	-2.20663	0.0425758	0.999313	-3.66412
O00214	LGALS8	PMA:SMES	0.389507	13.5851	2.20524	0.0426904	0.999313	-3.66613
Q9UFW8	CGGBP1	PMA:SMES	-0.174695	13.986	-2.20372	0.0428155	0.999313	-3.66832
Q9Y6M5	SLC30A1	PMA:SMES	0.537801	10.8276	2.20219	0.0429424	0.999313	-3.67054
P31323	PRKAR2B	PMA:SMES	0.291665	13.5379	2.19871	0.0432322	0.999313	-3.67557
O75038	PLCH2	PMA:SMES	0.357209	13.5914	2.1964	0.0434258	0.999313	-3.67891
Q8TEW8	PARD3B	PMA:SMES	-0.38172	11.8818	-2.19207	0.0437895	0.999313	-3.68515
Q9NQ94	A1CF	PMA:SMES	-0.601365	11.0533	-2.19176	0.043816	0.999313	-3.6856
O14657	TOR1B	PMA:SMES	0.281372	11.8145	2.19158	0.0438313	0.999313	-3.68586
Q9BY50	SEC11C	PMA:SMES	0.307227	12.2052	2.18979	0.0439826	0.999313	-3.68844
Q8WU90	ZC3H15	PMA:SMES	0.331303	11.9958	2.1888	0.0440669	0.999313	-3.68987
O60229	KALRN	PMA:SMES	-0.503878	10.3255	-2.18166	0.0446769	0.999313	-3.70015
O75821	EIF3G	PMA:SMES	-0.304584	12.2864	-2.16609	0.0460359	0.999313	-3.72253
Q53ET0	CRTC2	PMA:SMES	-0.556717	11.0161	-2.16571	0.0460694	0.999313	-3.72308
Q01196	RUNX1	PMA:SMES	-0.337839	12.5205	-2.16052	0.0465304	0.999313	-3.73051
Q14165	MLEC	PMA:SMES	0.285395	13.3441	2.15527	0.047002	0.999313	-3.73804
P54652	HSPA2	PMA:SMES	-0.241703	13.0201	-2.15207	0.0472911	0.999313	-3.74261
Q8N6H7	ARFGAP2	PMA:SMES	-0.387627	13.6954	-2.15132	0.0473596	0.999313	-3.74369
O60307	MAST3	PMA:SMES	-0.267206	12.6253	-2.14948	0.0475264	0.999313	-3.74631
O43665	RGS10	PMA:SMES	0.409014	12.2429	2.14706	0.0477478	0.999313	-3.74978
Q9NUX5	POT1	PMA:SMES	-0.678396	10.4953	-2.14312	0.0481097	0.999313	-3.75541
P05388	RPLP0	PMA:SMES	-0.216951	15.5727	-2.14287	0.0481321	0.999313	-3.75576
Q8N5W9	RFLNB	PMA:SMES	-0.670296	14.0767	-2.14221	0.0481935	0.999313	-3.75671
P35475	IDUA	PMA:SMES	-0.342053	11.0379	-2.14071	0.0483317	0.999313	-3.75884
P10114	RAP2A	PMA:SMES	-0.355423	12.8268	-2.13972	0.0484234	0.999313	-3.76026
P51608	MECP2	PMA:SMES	-0.329016	12.6592	-2.13964	0.0484308	0.999313	-3.76037
Q7Z4G1	COMMD6	PMA:SMES	-0.508977	11.1641	-2.13224	0.0491213	0.999313	-3.77092
Q16650	TBR1	PMA:SMES	-0.435711	13.4221	-2.12439	0.0498636	0.999313	-3.78209
O75521	ECI2	PMA:SMES	0.374643	11.0866	2.12043	0.0502418	0.999313	-3.78772
Q86X52	CHSY1	PMA:SMES	0.362981	11.514	2.10987	0.0512642	0.999313	-3.80271
P0DN76	U2AF1	PMA:SMES	-0.319925	15.086	-2.1077	0.0514759	0.999313	-3.80578
P15880	RPS2	PMA:SMES	-0.176778	14.7267	-2.10653	0.0515915	0.999313	-3.80744
Q9NQX3	GPHN	PMA:SMES	-0.372201	12.6152	-2.10435	0.051806	0.999313	-3.81053
Q9Y282	ERGIC3	PMA:SMES	-0.471329	11.5696	-2.10218	0.0520205	0.999313	-3.8136
Q9NQL2	RRAGD	PMA:SMES	0.262591	13.823	2.1021	0.0520284	0.999313	-3.81372
Q8IXT5	RBM12B	PMA:SMES	0.213337	12.2254	2.09803	0.0524322	0.999313	-3.81946
Q9Y225	RNF24	PMA:SMES	0.726162	11.0969	2.09667	0.0525681	0.999313	-3.82139
C4AMC7		PMA:SMES	-0.253053	13.4398	-2.09655	0.0525801	0.999313	-3.82156
P19784	CSNK2A2	PMA:SMES	-0.207632	13.2085	-2.09458	0.0527778	0.999313	-3.82435
Q9UI08	EVL	PMA:SMES	0.339349	12.9103	2.09435	0.052801	0.999313	-3.82467
Q6RW13	AGTRAP	PMA:SMES	-0.312275	15.0981	-2.09329	0.0529071	0.999313	-3.82617
Q12802	AKAP13	PMA:SMES	-0.202341	13.4154	-2.09292	0.0529442	0.999313	-3.82669
O14910	LIN7A	PMA:SMES	0.504496	11.5318	2.09215	0.0530213	0.999313	-3.82777
Q16658	FSCN1	PMA:SMES	0.267111	11.4192	2.08675	0.0535685	0.999313	-3.83539
Q96FZ2	HMCES	PMA:SMES	-0.902177	9.99583	-2.08566	0.0536794	0.999313	-3.83693
Q9BRT6	LLPH	PMA:SMES	-0.591263	10.3972	-2.07939	0.0543215	0.999313	-3.84576
O75794	CDC123	PMA:SMES	-0.301849	13.0055	-2.07821	0.0544435	0.999313	-3.84743
P10242	MYB	PMA:SMES	-0.34407	12.3007	-2.07632	0.0546384	0.999313	-3.85008
Q6JQN1	ACAD10	PMA:SMES	0.395338	11.6372	2.07176	0.0551127	0.999313	-3.85649
P50453	SERPINB9	PMA:SMES	-0.213715	14.0821	-2.06772	0.0555352	0.999313	-3.86216
Q9H7M9	VSIR	PMA:SMES	-0.372601	13.5237	-2.06748	0.0555611	0.999313	-3.8625
Q03518	TAP1	PMA:SMES	-0.206316	14.4546	-2.06479	0.0558441	0.999313	-3.86627
Q9H2U2	PPA2	PMA:SMES	0.187111	14.9136	2.06217	0.0561213	0.999313	-3.86994
Q92630	DYRK2	PMA:SMES	0.460157	15.831	2.06169	0.0561722	0.999313	-3.87061
Q92922	SMARCC1	PMA:SMES	-0.552488	10.4569	-2.06147	0.0561963	0.999313	-3.87093
Q14667	BLTP2	PMA:SMES	0.310818	13.2195	2.05941	0.0564156	0.999313	-3.87382
Q8NHM5	KDM2B	PMA:SMES	-0.404025	13.3373	-2.05876	0.0564846	0.999313	-3.87472
P11766	ADH5	PMA:SMES	-0.16207	16.1098	-2.05807	0.0565585	0.999313	-3.87569
Q7Z434	MAVS	PMA:SMES	-0.256716	13.162	-2.0549	0.0568984	0.999313	-3.88013
Q9NP61	ARFGAP3	PMA:SMES	-0.309377	12.417	-2.05284	0.0571195	0.999313	-3.88301
Q7Z591	AKNA	PMA:SMES	-0.546509	11.0122	-2.05189	0.0572224	0.999313	-3.88434
P08670	VIM	PMA:SMES	-0.189709	19.4186	-2.05012	0.0574138	0.999313	-3.88681
Q01543	FLI1	PMA:SMES	-0.364818	12.2605	-2.04938	0.0574939	0.999313	-3.88785
Q13409	DYNC1I2	PMA:SMES	-0.519455	12.0756	-2.04799	0.0576452	0.999313	-3.88979
P06241	FYN	PMA:SMES	0.305621	11.5803	2.0464	0.0578186	0.999313	-3.89202
Q8TD84	DSCAML1	PMA:SMES	0.390058	12.9343	2.04484	0.0579881	0.999313	-3.89418
Q8N0X7	SPART	PMA:SMES	-0.290689	11.3474	-2.04327	0.0581606	0.999313	-3.89638
O43633	CHMP2A	PMA:SMES	-0.210912	15.1258	-2.03922	0.0586053	0.999313	-3.90202
Q4G0F5	VPS26B	PMA:SMES	-0.243259	13.9376	-2.03648	0.058909	0.999313	-3.90585
Q96PV6	LENG8	PMA:SMES	0.423236	10.5849	2.03335	0.0592567	0.999313	-3.9102
P01903	HLA-DRA	PMA:SMES	0.314705	11.7509	2.02829	0.0598232	0.999313	-3.91724
Q9H4L4	SENP3	PMA:SMES	0.463171	12.5316	2.0244	0.0602627	0.999313	-3.92265
Q8IWB9	TEX2	PMA:SMES	0.354416	12.0383	2.02127	0.060618	0.999313	-3.92699
Q9NVX0	HAUS2	PMA:SMES	0.370205	11.5701	2.01999	0.0607638	0.999313	-3.92877
Q9BRT3	MIEN1	PMA:SMES	-0.411413	12.1817	-2.01876	0.0609047	0.999313	-3.93048
Q3KQU3	MAP7D1	PMA:SMES	-0.286776	14.0674	-2.01787	0.0610056	0.999313	-3.93171
P06731	CEACAM5	PMA:SMES	0.244468	19.73	2.01764	0.061032	0.999313	-3.93202
Q8IV50	LYSMD2	PMA:SMES	-0.207586	12.6995	-2.01148	0.0617417	0.999313	-3.94056
Q659C4	LARP1B	PMA:SMES	0.400344	12.0064	2.0074	0.062216	0.999313	-3.94621
P19484	TFEB	PMA:SMES	-0.590909	10.2242	-2.00517	0.0624762	0.999313	-3.94929
O60684	KPNA6	PMA:SMES	0.229036	13.9377	2.00366	0.0626523	0.999313	-3.95137
Q15269	PWP2	PMA:SMES	-0.358929	11.2856	-2.0024	0.0628006	0.999313	-3.95312
P0DP23	CALM1	PMA:SMES	-0.460373	17.0994	-2.00193	0.0628557	0.999313	-3.95376
Q5QJ74	TBCEL	PMA:SMES	0.434712	11.3904	2.00126	0.0629344	0.999313	-3.95469
Q96KQ4	PPP1R13B	PMA:SMES	0.50864	14.6161	1.99986	0.0630995	0.999313	-3.95662
P20810	CAST	PMA:SMES	-0.339322	14.6098	-1.9967	0.0634739	0.999313	-3.96098
Q9UHB9	SRP68	PMA:SMES	-0.310955	13.1665	-1.99568	0.0635955	0.999313	-3.96239
P51610	HCFC1	PMA:SMES	-0.170093	14.6244	-1.99341	0.0638659	0.999313	-3.96552
Q96SI9	STRBP	PMA:SMES	-0.252173	14.5809	-1.98818	0.0644921	0.999313	-3.97272
O95674	CDS2	PMA:SMES	-0.320441	12.9673	-1.98614	0.0647385	0.999313	-3.97553
A2A3N6		PMA:SMES	-0.688768	13.2724	-1.98085	0.0653811	0.999313	-3.9828
Q9H444	CHMP4B	PMA:SMES	-0.531071	13.9209	-1.97821	0.0657025	0.999313	-3.98641
Q8TEX9	IPO4	PMA:SMES	0.170432	14.2995	1.97659	0.0659015	0.999313	-3.98864
Q00839	HNRNPU	PMA:SMES	-0.157794	17.3286	-1.96663	0.0671345	0.999313	-4.00228
P05204	HMGN2	PMA:SMES	1.14682	16.9044	1.96571	0.0672493	0.999313	-4.00354
O60231	DHX16	PMA:SMES	0.205936	12.3477	1.96297	0.0675928	0.999313	-4.00729
Q9BYW2	SETD2	PMA:SMES	0.984454	12.2601	1.95928	0.0680586	0.999313	-4.01233
Q6P1X6	C8orf82	PMA:SMES	-0.591086	9.75878	-1.95899	0.0680945	0.999313	-4.01272
Q6P2E9	EDC4	PMA:SMES	-0.130289	15.6614	-1.95838	0.0681724	0.999313	-4.01356
P62330	ARF6	PMA:SMES	-0.154949	17.2496	-1.95765	0.0682643	0.999313	-4.01455
Q15811	ITSN1	PMA:SMES	-0.268002	12.209	-1.95731	0.0683081	0.999313	-4.01502
O95425	SVIL	PMA:SMES	-0.159847	14.0625	-1.95655	0.0684045	0.999313	-4.01606
Q9C0E8	LNPK	PMA:SMES	-0.181816	14.5275	-1.955	0.0686006	0.999313	-4.01816
Q14699	RFTN1	PMA:SMES	0.653673	9.45427	1.95303	0.0688527	0.999313	-4.02086
O43566	RGS14	PMA:SMES	-0.161118	15.0229	-1.95237	0.0689367	0.999313	-4.02176
Q86V48	LUZP1	PMA:SMES	0.383473	11.4113	1.95201	0.0689832	0.999313	-4.02225
P54687	BCAT1	PMA:SMES	-0.424158	10.8145	-1.94748	0.0695652	0.999313	-4.02842
Q8NC42	RNF149	PMA:SMES	0.253912	12.9703	1.94471	0.0699228	0.999313	-4.03219
O14639	ABLIM1	PMA:SMES	-0.348469	11.5395	-1.94245	0.0702161	0.999313	-4.03526
Q9H8Y8	GORASP2	PMA:SMES	-0.300552	13.008	-1.93954	0.0705954	0.999313	-4.03921
Q9GZQ3	COMMD5	PMA:SMES	0.237885	14.0248	1.93746	0.0708675	0.999313	-4.04203
A8MW92	PHF20L1	PMA:SMES	-0.299475	11.664	-1.93647	0.0709966	0.999313	-4.04337
Q13011	ECH1	PMA:SMES	-0.158619	14.7897	-1.9348	0.0712165	0.999313	-4.04564
Q14914	PTGR1	PMA:SMES	-0.34118	12.4031	-1.93437	0.071273	0.999313	-4.04622
O43318	MAP3K7	PMA:SMES	0.311167	12.5415	1.93277	0.0714847	0.999313	-4.04839
Q9H3P2	NELFA	PMA:SMES	-0.214302	17.4512	-1.93068	0.0717615	0.999313	-4.05123
Q7LG56	RRM2B	PMA:SMES	0.596698	11.3879	1.92994	0.0718588	0.999313	-4.05222
Q12959	DLG1	PMA:SMES	0.28277	11.7461	1.92924	0.0719526	0.999313	-4.05318
Q5SWH9	TMEM69	PMA:SMES	0.772746	10.4322	1.92922	0.0719549	0.999313	-4.0532
O95985	TOP3B	PMA:SMES	0.320457	11.6554	1.92913	0.0719674	0.999313	-4.05333
Q643R3	LPCAT4	PMA:SMES	0.87337	9.527	1.92901	0.0719828	0.999313	-4.05349
Q8WWW0	RASSF5	PMA:SMES	-0.172411	14.2957	-1.92854	0.0720449	0.999313	-4.05412
Q5BJF6	ODF2	PMA:SMES	-0.24168	11.2366	-1.92822	0.0720873	0.999313	-4.05455
Q9GZS3	SKIC8	PMA:SMES	0.212065	13.7568	1.92697	0.0722541	0.999313	-4.05624
Q92551	IP6K1	PMA:SMES	0.311402	11.6996	1.92662	0.0723006	0.999313	-4.05671
P55209	NAP1L1	PMA:SMES	-0.511176	14.1721	-1.92221	0.0728924	0.999313	-4.06269
Q04917	YWHAH	PMA:SMES	-0.374492	13.0715	-1.91538	0.0738155	0.999313	-4.0719
Q99490	AGAP2	PMA:SMES	-0.297348	13.5721	-1.91031	0.0745079	0.999313	-4.07874
Q9BV44	THUMPD3	PMA:SMES	0.288098	11.3625	1.90969	0.0745933	0.999313	-4.07957
Q9BQ70	TCF25	PMA:SMES	-0.666772	9.40635	-1.90925	0.0746528	0.999313	-4.08016
Q9NRR3	CDC42SE2	PMA:SMES	-0.517811	9.81187	-1.90891	0.0747001	0.999313	-4.08062
Q13347	EIF3I	PMA:SMES	-0.153319	14.3512	-1.90864	0.0747372	0.999313	-4.08098
Q9BTZ2	DHRS4	PMA:SMES	0.430975	11.7454	1.90803	0.0748209	0.999313	-4.0818
Q8N1K5	THEMIS	PMA:SMES	-0.368162	15.3896	-1.9041	0.0753634	0.999313	-4.08709
Q5W0Z9	ZDHHC20	PMA:SMES	-0.6108	10.6298	-1.90284	0.0755385	0.999313	-4.08878
Q9H3S1	SEMA4A	PMA:SMES	-0.332501	10.9614	-1.90187	0.0756737	0.999313	-4.09009
Q9UNP9	PPIE	PMA:SMES	-0.445218	12.5719	-1.9013	0.0757524	0.999313	-4.09085
Q9UJX6	ANAPC2	PMA:SMES	-0.412901	11.562	-1.89638	0.0764406	0.999313	-4.09746
Q9H2P0	ADNP	PMA:SMES	-0.500126	10.1983	-1.89583	0.0765176	0.999313	-4.0982
Q86YV0	RASAL3	PMA:SMES	-0.150323	15.2617	-1.89065	0.0772482	0.999313	-4.10514
Q9NS86	LANCL2	PMA:SMES	-0.267012	12.0168	-1.89038	0.0772865	0.999313	-4.1055
Q9BTU6	PI4K2A	PMA:SMES	-0.281559	12.1902	-1.89017	0.0773152	0.999313	-4.10577
Q14185	DOCK1	PMA:SMES	0.217713	13.1371	1.8896	0.0773962	0.999313	-4.10654
P31937	HIBADH	PMA:SMES	-0.211732	12.5824	-1.88609	0.0778966	0.999313	-4.11124
Q14573	ITPR3	PMA:SMES	0.178336	16.0569	1.88511	0.0780354	0.999313	-4.11254
Q8N766	EMC1	PMA:SMES	0.216231	14.061	1.8845	0.0781232	0.999313	-4.11336
P30041	PRDX6	PMA:SMES	-0.174642	18.2321	-1.88396	0.0782011	0.999313	-4.11409
I3L3R5	CCER2	PMA:SMES	-0.745297	11.6963	-1.88354	0.0782605	0.999313	-4.11464
P04179	SOD2	PMA:SMES	-0.200996	16.1124	-1.87781	0.0790859	0.999313	-4.1223
P17612	PRKACA	PMA:SMES	0.184442	15.4703	1.87659	0.0792618	0.999313	-4.12392
O15160	POLR1C	PMA:SMES	-0.367512	10.861	-1.87547	0.0794241	0.999313	-4.12541
Q99719	SEPTIN5	PMA:SMES	-0.161711	15.6107	-1.87543	0.0794308	0.999313	-4.12547
Q96CD2	PPCDC	PMA:SMES	-0.158843	13.19	-1.87494	0.0795018	0.999313	-4.12612
Q9UMY4	SNX12	PMA:SMES	0.198617	14.2952	1.87446	0.0795716	0.999313	-4.12676
Q969M7	UBE2F	PMA:SMES	-0.568481	10.5037	-1.87189	0.0799465	0.999313	-4.13019
P21291	CSRP1	PMA:SMES	-0.221141	13.9952	-1.87178	0.0799618	0.999313	-4.13033
Q9BZL1	UBL5	PMA:SMES	-0.346372	12.6659	-1.87087	0.0800951	0.999313	-4.13154
O00161	SNAP23	PMA:SMES	-0.307221	14.2839	-1.86919	0.0803413	0.999313	-4.13378
Q13976	PRKG1	PMA:SMES	0.379997	11.1514	1.86509	0.0809449	0.999313	-4.13923
Q9UQR0	SCML2	PMA:SMES	-0.495313	10.066	-1.86249	0.0813288	0.999313	-4.14267
Q9C0J8	WDR33	PMA:SMES	-0.157543	13.2094	-1.85985	0.081721	0.999313	-4.14618
Q13627	DYRK1A	PMA:SMES	0.241969	12.1652	1.85859	0.0819093	0.999313	-4.14785
Q14444	CAPRIN1	PMA:SMES	0.215243	13.0896	1.85703	0.0821425	0.999313	-4.14992
Q00577	PURA	PMA:SMES	0.298468	12.502	1.85361	0.0826554	0.999313	-4.15445
Q12912	IRAG2	PMA:SMES	-0.181547	14.1556	-1.85278	0.0827796	0.999313	-4.15554
Q06481	APLP2	PMA:SMES	-0.328388	10.8652	-1.85237	0.0828423	0.999313	-4.15609
Q9NRA8	EIF4ENIF1	PMA:SMES	-0.434348	11.1703	-1.84987	0.0832195	0.999313	-4.1594
Q13595	TRA2A	PMA:SMES	0.282069	12.7722	1.84807	0.083492	0.999313	-4.16177
Q7Z5L9	IRF2BP2	PMA:SMES	-0.316355	10.8392	-1.84723	0.0836195	0.999313	-4.16288
O75385	ULK1	PMA:SMES	0.466224	16.4037	1.84701	0.0836532	0.999313	-4.16318
Q32MZ4	LRRFIP1	PMA:SMES	-0.365337	14.0768	-1.84508	0.083947	0.999313	-4.16572
Q8TAF3	WDR48	PMA:SMES	0.190107	12.8992	1.84231	0.0843708	0.999313	-4.16938
Q99808	SLC29A1	PMA:SMES	-0.538935	13.254	-1.84204	0.0844123	0.999313	-4.16974
P52594	AGFG1	PMA:SMES	-0.244806	13.8591	-1.84014	0.0847039	0.999313	-4.17225
Q8WVV9	HNRNPLL	PMA:SMES	-0.198393	13.0135	-1.83847	0.0849606	0.999313	-4.17444
Q9UKX7	NUP50	PMA:SMES	-0.1683	14.7528	-1.8381	0.0850177	0.999313	-4.17493
O43150	ASAP2	PMA:SMES	0.202166	14.719	1.83791	0.0850471	0.999313	-4.17518
O00629	KPNA4	PMA:SMES	-0.216529	12.8939	-1.83734	0.0851349	0.999313	-4.17593
Q6PJW8	CNST	PMA:SMES	-0.352528	11.1009	-1.8366	0.0852497	0.999313	-4.17691
Q99487	PAFAH2	PMA:SMES	0.257169	11.6112	1.83458	0.085563	0.999313	-4.17957
Q9NR56	MBNL1	PMA:SMES	-0.241128	12.6883	-1.8343	0.0856053	0.999313	-4.17993
Q9BUB5	MKNK1	PMA:SMES	0.291566	11.0605	1.83114	0.0860974	0.999313	-4.18409
O94817	ATG12	PMA:SMES	0.334016	11.899	1.83019	0.0862451	0.999313	-4.18533
P31943	HNRNPH1	PMA:SMES	-0.195731	15.9934	-1.8217	0.087581	0.999313	-4.19648
Q5JVF3	PCID2	PMA:SMES	-0.144234	12.5065	-1.82076	0.0877294	0.999313	-4.19771
Q6N069	NAA16	PMA:SMES	-0.256966	12.1089	-1.81706	0.0883192	0.999313	-4.20256
A8MXV4	NUDT19	PMA:SMES	0.429397	13.3063	1.817	0.088329	0.999313	-4.20264
Q15542	TAF5	PMA:SMES	0.476428	11.5329	1.81666	0.0883833	0.999313	-4.20309
O14526	FCHO1	PMA:SMES	-0.205917	12.7361	-1.81536	0.0885897	0.999313	-4.20478
Q99996	AKAP9	PMA:SMES	0.499587	12.6653	1.81327	0.0889244	0.999313	-4.20751
Q8NFV4	ABHD11	PMA:SMES	-0.400109	10.5979	-1.81313	0.0889476	0.999313	-4.2077
P33897	ABCD1	PMA:SMES	-0.447304	11.1489	-1.81199	0.0891305	0.999313	-4.20919
Q15059	BRD3	PMA:SMES	-0.261447	12.3004	-1.81065	0.0893459	0.999313	-4.21093
P14543	NID1	PMA:SMES	0.629054	12.8082	1.80734	0.0898821	0.999313	-4.21526
Q2TAL8	QRICH1	PMA:SMES	0.341305	10.6365	1.80565	0.0901555	0.999313	-4.21746
O95602	POLR1A	PMA:SMES	0.282245	14.8599	1.80463	0.0903208	0.999313	-4.21879
P51665	PSMD7	PMA:SMES	0.175716	15.4387	1.80369	0.0904742	0.999313	-4.22001
Q8NB66	UNC13C	PMA:SMES	-0.730292	15.061	-1.80237	0.0906907	0.999313	-4.22174
Q9BRX8	PRXL2A	PMA:SMES	0.285436	11.2148	1.80231	0.0906997	0.999313	-4.22181
P06132	UROD	PMA:SMES	-0.269109	12.5537	-1.80179	0.0907848	0.999313	-4.22249
Q9NVV5	AIG1	PMA:SMES	0.426204	10.3869	1.80164	0.0908084	0.999313	-4.22268
P61457	PCBD1	PMA:SMES	-0.167231	13.5839	-1.80077	0.0909508	0.999313	-4.22381
P54252	ATXN3	PMA:SMES	-0.361457	13.0299	-1.80035	0.0910204	0.999313	-4.22437
P35914	HMGCL	PMA:SMES	0.389244	11.7094	1.79957	0.091149	0.999313	-4.22539
Q12872	SFSWAP	PMA:SMES	-0.426778	11.1095	-1.79672	0.0916163	0.999313	-4.22908
Q8TDZ2	MICAL1	PMA:SMES	-0.148325	15.2268	-1.7958	0.0917691	0.999313	-4.23029
Q7Z3C6	ATG9A	PMA:SMES	-0.221976	11.7366	-1.79494	0.0919112	0.999313	-4.23141
P02792	FTL	PMA:SMES	0.302267	13.7694	1.79273	0.0922756	0.999313	-4.23426
Q96N11	INTS15	PMA:SMES	0.229051	13.3793	1.79225	0.0923562	0.999313	-4.2349
P49756	RBM25	PMA:SMES	-0.247713	13.3298	-1.79192	0.0924099	0.999313	-4.23532
Q96PU5	NEDD4L	PMA:SMES	-0.213809	13.5419	-1.79129	0.0925149	0.999313	-4.23614
Q9Y336	SIGLEC9	PMA:SMES	-0.746018	10.9721	-1.78867	0.0929523	0.999313	-4.23954
P46013	MKI67	PMA:SMES	-0.235513	12.2754	-1.7872	0.0931969	0.999313	-4.24144
P17275	JUNB	PMA:SMES	-0.818488	10.4583	-1.78677	0.09327	0.999313	-4.242
O95319	CELF2	PMA:SMES	0.126293	16.2479	1.78317	0.0938739	0.999313	-4.24666
Q96T58	SPEN	PMA:SMES	-0.395683	13.1362	-1.78259	0.0939719	0.999313	-4.24742
Q96A35	MRPL24	PMA:SMES	-0.568099	10.8153	-1.78193	0.0940819	0.999313	-4.24826
Q13426	XRCC4	PMA:SMES	0.285386	13.5532	1.78115	0.0942138	0.999313	-4.24927
Q9Y3E1	HDGFL3	PMA:SMES	0.436298	10.7079	1.77877	0.0946171	0.999313	-4.25235
P61962	DCAF7	PMA:SMES	-0.355078	12.8712	-1.77729	0.0948684	0.999313	-4.25426
P23443	RPS6KB1	PMA:SMES	-0.395286	10.856	-1.77481	0.0952904	0.999313	-4.25746
Q9Y570	PPME1	PMA:SMES	0.165128	16.3365	1.77283	0.0956286	0.999313	-4.26002
Q13572	ITPK1	PMA:SMES	-0.203508	12.5155	-1.77166	0.0958293	0.999313	-4.26153
Q70E73	RAPH1	PMA:SMES	0.325972	13.306	1.77126	0.0958975	0.999313	-4.26204
O15533	TAPBP	PMA:SMES	-0.172555	14.3255	-1.76865	0.0963468	0.999313	-4.26541
P46926	GNPDA1	PMA:SMES	-0.168691	15.3105	-1.76836	0.0963966	0.999313	-4.26578
Q6ZVM7	TOM1L2	PMA:SMES	-0.238312	12.523	-1.76826	0.0964143	0.999313	-4.26591
Q9H7E2	TDRD3	PMA:SMES	-0.438196	9.86714	-1.76566	0.0968624	0.999313	-4.26925
Q96EV2	RBM33	PMA:SMES	-0.361972	17.8512	-1.76509	0.0969606	0.999313	-4.26998
P49585	PCYT1A	PMA:SMES	-0.198421	13.3033	-1.76479	0.0970135	0.999313	-4.27037
Q9UDW1	UQCR10	PMA:SMES	0.192152	15.2575	1.76356	0.0972259	0.999313	-4.27195
Q96BJ3	AIDA	PMA:SMES	-0.274563	11.6171	-1.75935	0.09796	0.999313	-4.27736
O14662	STX16	PMA:SMES	-0.520189	9.88991	-1.7554	0.0986529	0.999313	-4.28243
Q6ZSZ5	ARHGEF18	PMA:SMES	-0.151195	14.1663	-1.75506	0.098712	0.999313	-4.28286
Q99439	CNN2	PMA:SMES	-0.250858	18.5069	-1.7547	0.0987759	0.999313	-4.28332
Q07820	MCL1	PMA:SMES	-0.231007	12.1489	-1.75104	0.0994212	0.999313	-4.288
Q15022	SUZ12	PMA:SMES	0.185095	11.8675	1.7491	0.0997649	0.999313	-4.29048
Q9H992	MARCHF7	PMA:SMES	0.55338	12.2218	1.74867	0.0998419	0.999313	-4.29104
Q93052	LPP	PMA:SMES	-0.244982	11.5009	-1.74844	0.0998832	0.999313	-4.29134
P51159	RAB27A	PMA:SMES	-0.302185	16.9317	-1.74817	0.0999312	0.999313	-4.29168
O95210	STBD1	PMA:SMES	-0.211957	15.7516	-1.74684	0.100168	0.999313	-4.29338
P27816	MAP4	PMA:SMES	-0.222327	13.7147	-1.74642	0.100243	0.999313	-4.29391
Q01831	XPC	PMA:SMES	-0.233895	11.5934	-1.745	0.100496	0.999313	-4.29573
P34810	CD68	PMA:SMES	-0.620434	10.3347	-1.74291	0.100871	0.999313	-4.2984
P51798	CLCN7	PMA:SMES	0.178053	13.1948	1.74245	0.100952	0.999313	-4.29898
P84085	ARF5	PMA:SMES	-0.251639	17.9359	-1.73769	0.10181	0.999313	-4.30505
Q9BV86	NTMT1	PMA:SMES	0.517659	10.6874	1.73753	0.101838	0.999313	-4.30525
Q96HS1	PGAM5	PMA:SMES	0.269138	12.7527	1.73097	0.103031	0.999313	-4.3136
P60983	GMFB	PMA:SMES	0.390427	13.534	1.72957	0.103288	0.999313	-4.31538
Q9HBI1	PARVB	PMA:SMES	0.291312	14.0396	1.7292	0.103355	0.999313	-4.31585
Q9P0I2	EMC3	PMA:SMES	-0.193995	13.3642	-1.72819	0.10354	0.999313	-4.31713
Q8WVC6	DCAKD	PMA:SMES	0.153823	15.3626	1.72687	0.103783	0.999313	-4.31881
Q9UKY7	CDV3	PMA:SMES	-0.258952	15.49	-1.72597	0.103948	0.999313	-4.31995
Q08495	DMTN	PMA:SMES	0.337387	12.7826	1.72237	0.104613	0.999313	-4.32451
Q15691	MAPRE1	PMA:SMES	-0.240275	13.7922	-1.72189	0.104702	0.999313	-4.32512
P52597	HNRNPF	PMA:SMES	-0.352671	13.0246	-1.72135	0.104802	0.999313	-4.3258
Q9NP58	ABCB6	PMA:SMES	0.268677	14.8979	1.71977	0.105094	0.999313	-4.3278
P23229	ITGA6	PMA:SMES	0.250434	12.2634	1.71623	0.105755	0.999313	-4.33228
Q13586	STIM1	PMA:SMES	-0.189929	14.3237	-1.71601	0.105795	0.999313	-4.33255
Q9UJX5	ANAPC4	PMA:SMES	0.215631	12.1718	1.7147	0.10604	0.999313	-4.33421
P45983	MAPK8	PMA:SMES	0.229498	13.5124	1.71422	0.106131	0.999313	-4.33482
P08631	HCK	PMA:SMES	-0.215117	15.7223	-1.71396	0.106179	0.999313	-4.33515
Q92785	DPF2	PMA:SMES	-0.216383	12.5037	-1.71215	0.10652	0.999313	-4.33744
Q14157	UBAP2L	PMA:SMES	-0.260446	13.0897	-1.70845	0.107217	0.999313	-4.3421
O75475	PSIP1	PMA:SMES	-0.171806	13.8086	-1.70805	0.107293	0.999313	-4.34261
P28702	RXRB	PMA:SMES	0.401939	11.5988	1.70801	0.1073	0.999313	-4.34265
P49321	NASP	PMA:SMES	-0.247863	13.2028	-1.70313	0.108227	0.999313	-4.3488
P29466	CASP1	PMA:SMES	-0.238007	14.0236	-1.70306	0.10824	0.999313	-4.34888
Q15942	ZYX	PMA:SMES	-0.16982	17.0342	-1.70267	0.108315	0.999313	-4.34938
Q9UHB4	NDOR1	PMA:SMES	0.297739	10.9729	1.70148	0.108543	0.999313	-4.35088
Q9UKM9	RALY	PMA:SMES	0.133825	16.1099	1.69792	0.109224	0.999313	-4.35535
O95718	ESRRB	PMA:SMES	0.630658	10.099	1.69338	0.1101	0.999313	-4.36104
P49720	PSMB3	PMA:SMES	0.387555	14.1688	1.69286	0.1102	0.999313	-4.36169
O95822	MLYCD	PMA:SMES	0.298453	11.2855	1.69041	0.110675	0.999313	-4.36475
Q6ZUJ8	PIK3AP1	PMA:SMES	-0.181553	12.7542	-1.69029	0.110699	0.999313	-4.36491
O00233	PSMD9	PMA:SMES	-0.132905	15.5194	-1.68785	0.111175	0.999313	-4.36796
Q9C0B7	TANGO6	PMA:SMES	-0.437998	9.80157	-1.68762	0.111219	0.999313	-4.36825
Q96CP6	GRAMD1A	PMA:SMES	0.18067	14.5441	1.68657	0.111425	0.999313	-4.36956
Q969T4	UBE2E3	PMA:SMES	-0.32092	12.9887	-1.68457	0.111816	0.999313	-4.37206
Q8WW22	DNAJA4	PMA:SMES	0.354146	11.3404	1.68451	0.111827	0.999313	-4.37213
O60870	KIN	PMA:SMES	-0.517032	9.50302	-1.68318	0.112088	0.999313	-4.37379
Q9UIS9	MBD1	PMA:SMES	-0.356197	12.365	-1.68273	0.112177	0.999313	-4.37436
P00395	COX1	PMA:SMES	0.5028	11.607	1.6819	0.112341	0.999313	-4.3754
P50914	RPL14	PMA:SMES	-0.252829	15.4403	-1.68065	0.112586	0.999313	-4.37695
Q99549	MPHOSPH8	PMA:SMES	0.202435	12.7929	1.67914	0.112884	0.999313	-4.37883
P55795	HNRNPH2	PMA:SMES	-0.233872	15.0758	-1.67819	0.113073	0.999313	-4.38002
P22732	SLC2A5	PMA:SMES	0.246543	13.1182	1.6772	0.113269	0.999313	-4.38125
Q5TAX3	TUT4	PMA:SMES	0.407956	10.1008	1.67004	0.114698	0.999313	-4.39016
A6NMY6		PMA:SMES	0.189273	14.2692	1.66909	0.114888	0.999313	-4.39134
Q6UW63	POGLUT2	PMA:SMES	0.242741	13.7923	1.66524	0.115663	0.999313	-4.39612
P41208	CETN2	PMA:SMES	-0.717298	10.5159	-1.66426	0.11586	0.999313	-4.39733
P02679	FGG	PMA:SMES	0.173292	14.0607	1.66407	0.1159	0.999313	-4.39757
Q99807	COQ7	PMA:SMES	-0.415691	11.2695	-1.66381	0.115951	0.999313	-4.39788
P56556	NDUFA6	PMA:SMES	0.22971	12.4254	1.66142	0.116437	0.999313	-4.40085
P07858	CTSB	PMA:SMES	0.146072	14.4764	1.66056	0.11661	0.999313	-4.4019
P22681	CBL	PMA:SMES	-0.179746	15.4404	-1.66023	0.116678	0.999313	-4.40232
A6NFE2	SMCO2	PMA:SMES	0.721258	9.45752	1.65804	0.117124	0.999313	-4.40503
Q8IV08	PLD3	PMA:SMES	0.179728	13.3794	1.65793	0.117146	0.999313	-4.40516
Q6UX71	PLXDC2	PMA:SMES	0.782426	9.1957	1.6555	0.117644	0.999313	-4.40817
Q8TDJ6	DMXL2	PMA:SMES	-0.228656	11.5803	-1.65549	0.117645	0.999313	-4.40817
Q9NPA0	EMC7	PMA:SMES	0.251157	11.7664	1.65509	0.117729	0.999313	-4.40868
Q99576	TSC22D3	PMA:SMES	-0.300836	12.239	-1.65499	0.117748	0.999313	-4.40879
Q9ULP9	TBC1D24	PMA:SMES	-0.192086	12.0553	-1.6549	0.117767	0.999313	-4.4089
Q9BRR6	ADPGK	PMA:SMES	0.131808	15.1703	1.65408	0.117935	0.999313	-4.40992
Q96SQ9	CYP2S1	PMA:SMES	-0.367381	15.1856	-1.65272	0.118216	0.999313	-4.4116
Q6PIJ6	FBXO38	PMA:SMES	0.522293	10.5213	1.65257	0.118246	0.999313	-4.41178
P01861		PMA:SMES	0.696728	11.8273	1.64766	0.119261	0.999313	-4.41784
Q7Z6M1	RABEPK	PMA:SMES	0.255104	11.1987	1.64716	0.119363	0.999313	-4.41845
Q7Z4W1	DCXR	PMA:SMES	-0.132601	14.9291	-1.64676	0.119447	0.999313	-4.41894
Q8WYL5	SSH1	PMA:SMES	-0.371575	10.6366	-1.64541	0.119728	0.999313	-4.42061
O95163	ELP1	PMA:SMES	0.175214	11.9604	1.64537	0.119735	0.999313	-4.42065
Q7Z7A4	PXK	PMA:SMES	0.208904	12.9223	1.64432	0.119954	0.999313	-4.42194
Q9H0F6	SHARPIN	PMA:SMES	-0.303814	11.8326	-1.64131	0.120582	0.999313	-4.42564
Q8NC96	NECAP1	PMA:SMES	-0.156271	13.8339	-1.6403	0.120794	0.999313	-4.42688
Q96S55	WRNIP1	PMA:SMES	0.185252	14.9581	1.63952	0.120958	0.999313	-4.42784
P08134	RHOC	PMA:SMES	0.179141	18.8939	1.63825	0.121225	0.999313	-4.4294
Q96CB8	INTS12	PMA:SMES	0.359289	12.4812	1.63792	0.121293	0.999313	-4.4298
O43615	TIMM44	PMA:SMES	0.364774	11.9663	1.63471	0.121971	0.999313	-4.43374
P47914	RPL29	PMA:SMES	-0.324716	13.1213	-1.63136	0.12268	0.999313	-4.43783
P83881	RPL36A	PMA:SMES	0.263556	11.4637	1.63128	0.122697	0.999313	-4.43793
P85037	FOXK1	PMA:SMES	-0.414483	12.1736	-1.62892	0.1232	0.999313	-4.44082
Q8WXI4	ACOT11	PMA:SMES	-0.224578	13.1211	-1.62877	0.123231	0.999313	-4.441
Q8TAD8	SNIP1	PMA:SMES	-0.30847	12.3703	-1.62851	0.123288	0.999313	-4.44133
P35249	RFC4	PMA:SMES	-0.219738	12.9092	-1.62753	0.123496	0.999313	-4.44252
Q9UHL4	DPP7	PMA:SMES	-0.1701	14.7774	-1.62549	0.123932	0.999313	-4.445
P12955	PEPD	PMA:SMES	0.261564	12.2674	1.62473	0.124096	0.999313	-4.44594
O43583	DENR	PMA:SMES	-0.414854	13.6425	-1.62223	0.124634	0.999313	-4.44899
O14683	TP53I11	PMA:SMES	-0.183029	16.9162	-1.61936	0.125252	0.999313	-4.45248
Q13951	CBFB	PMA:SMES	-0.208947	12.5759	-1.61848	0.125443	0.999313	-4.45355
O95466	FMNL1	PMA:SMES	-0.167207	16.5277	-1.61832	0.125477	0.999313	-4.45374
Q4V328	GRIPAP1	PMA:SMES	-0.176256	13.5279	-1.61732	0.125694	0.999313	-4.45496
Q02224	CENPE	PMA:SMES	0.284168	15.011	1.61113	0.127043	0.999313	-4.46248
Q5TDH0	DDI2	PMA:SMES	0.142996	16.0057	1.6111	0.12705	0.999313	-4.46252
Q13177	PAK2	PMA:SMES	-0.15188	16.1608	-1.60959	0.127381	0.999313	-4.46435
O15264	MAPK13	PMA:SMES	-0.197201	12.4865	-1.60803	0.127723	0.999313	-4.46624
Q7LBC6	KDM3B	PMA:SMES	-0.245284	15.2003	-1.60723	0.127899	0.999313	-4.46721
Q9Y3A3	MOB4	PMA:SMES	0.350613	11.6782	1.60574	0.128226	0.999313	-4.46901
Q99598	TSNAX	PMA:SMES	-0.166745	15.154	-1.60505	0.12838	0.999313	-4.46985
Q96JG6	VPS50	PMA:SMES	0.249339	11.5004	1.60418	0.128572	0.999313	-4.47091
P43405	SYK	PMA:SMES	-0.117509	15.8883	-1.60377	0.128663	0.999313	-4.4714
Q8NBE8	KLHL23	PMA:SMES	0.554345	11.6734	1.60292	0.12885	0.999313	-4.47242
P05141	SLC25A5	PMA:SMES	-0.136528	17.3207	-1.59865	0.1298	0.999313	-4.47758
P49917	LIG4	PMA:SMES	0.191233	11.3577	1.59733	0.130094	0.999313	-4.47918
Q9HC35	EML4	PMA:SMES	-0.142291	14.1911	-1.59657	0.130262	0.999313	-4.48009
P53582	METAP1	PMA:SMES	0.15524	13.171	1.59599	0.130393	0.999313	-4.48079
Q4VC44	FLYWCH1	PMA:SMES	0.278437	14.125	1.59383	0.130878	0.999313	-4.4834
Q969U7	PSMG2	PMA:SMES	0.323858	12.9949	1.5929	0.131086	0.999313	-4.48451
P13224	GP1BB	PMA:SMES	-0.358675	15.0595	-1.59139	0.131426	0.999313	-4.48633
P57678	GEMIN4	PMA:SMES	-0.506376	10.4557	-1.59138	0.131428	0.999313	-4.48634
Q05209	PTPN12	PMA:SMES	-0.198442	14.0548	-1.58868	0.132038	0.999313	-4.48959
P14635	CCNB1	PMA:SMES	-0.702837	10.5518	-1.58826	0.132132	0.999313	-4.49009
Q8WUK0	PTPMT1	PMA:SMES	0.468292	11.2772	1.58658	0.132514	0.999313	-4.49212
Q15057	ACAP2	PMA:SMES	-0.139671	15.6202	-1.58477	0.132924	0.999313	-4.49428
Q13114	TRAF3	PMA:SMES	0.32078	10.799	1.58397	0.133107	0.999313	-4.49525
Q8TCD5	NT5C	PMA:SMES	0.400591	10.3393	1.58253	0.133435	0.999313	-4.49697
P61006	RAB8A	PMA:SMES	-0.110155	15.9183	-1.58101	0.133783	0.999313	-4.49879
Q9H4B7	TUBB1	PMA:SMES	-0.296937	15.0038	-1.58007	0.133998	0.999313	-4.49992
P00568	AK1	PMA:SMES	-0.543468	12.5545	-1.57766	0.13455	0.999313	-4.5028
Q96E39	RBMXL1	PMA:SMES	0.276623	11.5309	1.57763	0.134557	0.999313	-4.50283
O75376	NCOR1	PMA:SMES	-0.207198	12.2743	-1.5751	0.13514	0.999313	-4.50586
P52306	RAP1GDS1	PMA:SMES	-0.10793	13.367	-1.57471	0.135229	0.999313	-4.50632
Q9GZZ1	NAA50	PMA:SMES	-0.197582	11.4236	-1.57378	0.135444	0.999313	-4.50744
P78330	PSPH	PMA:SMES	0.188403	12.8253	1.57301	0.135622	0.999313	-4.50836
Q14765	STAT4	PMA:SMES	0.367717	10.0478	1.57171	0.135925	0.999313	-4.50991
P27815	PDE4A	PMA:SMES	-0.272522	11.4008	-1.56959	0.136417	0.999313	-4.51244
Q92759	GTF2H4	PMA:SMES	-0.281874	10.3387	-1.56928	0.136487	0.999313	-4.5128
Q08999	RBL2	PMA:SMES	-0.29154	11.0327	-1.56761	0.136877	0.999313	-4.5148
Q16576	RBBP7	PMA:SMES	-0.159614	14.0035	-1.56463	0.137574	0.999313	-4.51835
Q9H9B4	SFXN1	PMA:SMES	-0.145089	14.0745	-1.5642	0.137673	0.999313	-4.51885
P11171	EPB41	PMA:SMES	-0.214619	13.8812	-1.56359	0.137818	0.999313	-4.51958
O60942	RNGTT	PMA:SMES	0.38738	10.3363	1.56355	0.137827	0.999313	-4.51963
P23468	PTPRD	PMA:SMES	0.328626	13.0692	1.56273	0.138019	0.999313	-4.52061
Q13617	CUL2	PMA:SMES	0.117663	13.8467	1.56218	0.138148	0.999313	-4.52125
Q9NR80	ARHGEF4	PMA:SMES	0.454042	10.7092	1.56194	0.138205	0.999313	-4.52154
Q99698	LYST	PMA:SMES	-0.120494	13.338	-1.56145	0.138319	0.999313	-4.52212
Q7Z7L7	ZER1	PMA:SMES	0.230993	14.6622	1.56069	0.138499	0.999313	-4.52302
P21108	PRPS1L1	PMA:SMES	-0.310284	15.656	-1.56006	0.138648	0.999313	-4.52378
Q14005	IL16	PMA:SMES	-0.142764	16.9975	-1.55907	0.138881	0.999313	-4.52495
Q9UBQ5	EIF3K	PMA:SMES	0.165805	14.1626	1.55804	0.139124	0.999313	-4.52617
Q6UUV7	CRTC3	PMA:SMES	-0.39836	10.4184	-1.55674	0.139432	0.999313	-4.52772
Q9P270	SLAIN2	PMA:SMES	-0.18421	12.3343	-1.5562	0.139559	0.999313	-4.52835
P50336	PPOX	PMA:SMES	-0.180213	13.3992	-1.55574	0.139669	0.999313	-4.5289
Q9H7P6	MVB12B	PMA:SMES	0.252636	10.4551	1.55558	0.139707	0.999313	-4.52909
P02765	AHSG	PMA:SMES	-0.575822	14.1453	-1.55451	0.13996	0.999313	-4.53035
Q9H2F5	EPC1	PMA:SMES	-0.538088	9.53798	-1.55366	0.140162	0.999313	-4.53135
Q8IVG5	SAMD9L	PMA:SMES	-0.169059	12.3606	-1.55212	0.14053	0.999313	-4.53318
P0DN79	CBS	PMA:SMES	0.470803	13.4848	1.55097	0.140803	0.999313	-4.53454
O15111	CHUK	PMA:SMES	0.152483	13.1654	1.55041	0.140937	0.999313	-4.5352
O00418	EEF2K	PMA:SMES	0.385718	12.4628	1.54966	0.141118	0.999313	-4.5361
P55265	ADAR	PMA:SMES	-0.141243	14.0215	-1.54945	0.141168	0.999313	-4.53634
P37287	PIGA	PMA:SMES	0.596945	10.4234	1.54858	0.141375	0.999313	-4.53736
P61326	MAGOH	PMA:SMES	0.176397	15.1904	1.54652	0.141871	0.999313	-4.5398
Q9Y530	OARD1	PMA:SMES	0.341315	13.7088	1.54594	0.14201	0.999313	-4.54048
P08648	ITGA5	PMA:SMES	-0.159874	12.8089	-1.54504	0.142226	0.999313	-4.54154
Q6UXN9	WDR82	PMA:SMES	0.137849	14.1678	1.54451	0.142353	0.999313	-4.54217
Q9UBC2	EPS15L1	PMA:SMES	-0.123487	13.9983	-1.54175	0.143019	0.999313	-4.54541
Q9NWZ3	IRAK4	PMA:SMES	-0.184279	12.2694	-1.54157	0.143063	0.999313	-4.54563
Q92995	USP13	PMA:SMES	0.419508	10.718	1.54155	0.143068	0.999313	-4.54565
Q9UKC9	FBXL2	PMA:SMES	-0.178382	13.7949	-1.54028	0.143377	0.999313	-4.54715
A1L390	PLEKHG3	PMA:SMES	-0.183115	12.4702	-1.53801	0.143928	0.999313	-4.54982
O95104	SCAF4	PMA:SMES	-0.341245	11.1379	-1.53769	0.144006	0.999313	-4.5502
Q687X5	STEAP4	PMA:SMES	-0.263666	13.6271	-1.53584	0.144457	0.999313	-4.55237
Q8IWA4	MFN1	PMA:SMES	0.331771	11.0759	1.53576	0.144476	0.999313	-4.55246
O75027	ABCB7	PMA:SMES	0.250668	11.5765	1.53542	0.144558	0.999313	-4.55286
Q3T8J9	GON4L	PMA:SMES	-0.635428	9.6767	-1.53383	0.144948	0.999313	-4.55473
Q9Y3D2	MSRB2	PMA:SMES	-0.177267	12.4101	-1.53323	0.145095	0.999313	-4.55543
Q86VI3	IQGAP3	PMA:SMES	0.611004	12.2185	1.53279	0.145202	0.999313	-4.55594
Q9BV19	C1orf50	PMA:SMES	-0.354752	10.3823	-1.5311	0.145618	0.999313	-4.55793
Q86VR8	FJX1	PMA:SMES	0.297771	11.9111	1.52979	0.145938	0.999313	-4.55946
Q96TA2	YME1L1	PMA:SMES	-0.561168	12.6536	-1.52838	0.146287	0.999313	-4.56112
Q9UKF6	CPSF3	PMA:SMES	0.113788	16.5655	1.52758	0.146483	0.999313	-4.56205
Q5JPE7	NOMO2	PMA:SMES	-0.469815	11.3943	-1.52647	0.146758	0.999313	-4.56335
Q9BVT8	TMUB1	PMA:SMES	-0.240518	12.4804	-1.52469	0.147198	0.999313	-4.56543
Q86YB8	ERO1B	PMA:SMES	0.230273	15.5573	1.52445	0.147258	0.999313	-4.56571
Q0PNE2	ELP6	PMA:SMES	0.247946	11.3665	1.52387	0.147402	0.999313	-4.56638
Q9BTY7	HGH1	PMA:SMES	0.216151	12.4409	1.52214	0.147832	0.999313	-4.5684
Q9H0H0	INTS2	PMA:SMES	-0.362035	10.5062	-1.5218	0.147917	0.999313	-4.5688
Q8NHH9	ATL2	PMA:SMES	0.324784	11.2943	1.52084	0.148156	0.999313	-4.56992
Q8IWW6	ARHGAP12	PMA:SMES	0.485137	10.3773	1.51955	0.148479	0.999313	-4.57143
Q96GW9	MARS2	PMA:SMES	0.266959	16.4509	1.51936	0.148524	0.999313	-4.57164
P63172	DYNLT1	PMA:SMES	-0.68902	11.0986	-1.51929	0.148543	0.999313	-4.57173
Q9Y333	LSM2	PMA:SMES	-0.200344	12.7743	-1.51527	0.149549	0.999313	-4.57641
Q9UN37	VPS4A	PMA:SMES	-0.122955	17.0785	-1.51502	0.149614	0.999313	-4.57671
Q9NXH8	TOR4A	PMA:SMES	0.190303	13.404	1.5143	0.149795	0.999313	-4.57754
Q9Y2G3	ATP11B	PMA:SMES	-0.153158	13.8264	-1.51374	0.149934	0.999313	-4.57818
Q9UKB1	FBXW11	PMA:SMES	0.349805	10.2098	1.51367	0.149952	0.999313	-4.57827
Q7L7X3	TAOK1	PMA:SMES	0.265166	11.5009	1.51349	0.149997	0.999313	-4.57848
Q04323	UBXN1	PMA:SMES	-0.225686	14.661	-1.51328	0.150052	0.999313	-4.57873
Q9BZF2	OSBPL7	PMA:SMES	0.585265	15.9998	1.51052	0.150747	0.999313	-4.58193
Q8TCE6	DENND10	PMA:SMES	0.132734	12.9153	1.51036	0.150788	0.999313	-4.58212
Q92841	DDX17	PMA:SMES	-0.158172	15.3746	-1.5102	0.150828	0.999313	-4.5823
P23219	PTGS1	PMA:SMES	-0.181699	13.3553	-1.50838	0.151288	0.999313	-4.58441
Q9Y618	NCOR2	PMA:SMES	0.477849	13.4309	1.50771	0.15146	0.999313	-4.58519
Q9BYI3	HYCC1	PMA:SMES	0.366096	11.0434	1.50663	0.151733	0.999313	-4.58644
O75822	EIF3J	PMA:SMES	-0.359434	13.6494	-1.504	0.152404	0.999313	-4.58949
Q00403	GTF2B	PMA:SMES	-0.170358	12.6876	-1.50372	0.152475	0.999313	-4.58981
Q8IVV7	GID4	PMA:SMES	0.287364	10.5115	1.50233	0.152832	0.999313	-4.59142
Q9UGI8	TES	PMA:SMES	-0.144884	15.0389	-1.50157	0.153026	0.999313	-4.5923
Q9NQA3		PMA:SMES	-0.235051	12.4188	-1.50138	0.153073	0.999313	-4.59251
Q9Y5R8	TRAPPC1	PMA:SMES	-0.189737	13.5536	-1.50092	0.153191	0.999313	-4.59305
Q9UBV8	PEF1	PMA:SMES	-0.168491	14.1133	-1.50039	0.153327	0.999313	-4.59366
Q06787	FMR1	PMA:SMES	-0.41712	12.1331	-1.49924	0.153622	0.999313	-4.59498
Q96T60	PNKP	PMA:SMES	-0.155959	13.5825	-1.49872	0.153757	0.999313	-4.59559
P30260	CDC27	PMA:SMES	-0.32062	10.8792	-1.49636	0.154363	0.999313	-4.59831
Q6ZSR9		PMA:SMES	-0.166225	13.1461	-1.4949	0.15474	0.999313	-4.59999
P26640	VARS1	PMA:SMES	-0.100379	14.9164	-1.49455	0.154831	0.999313	-4.60039
P38919	EIF4A3	PMA:SMES	-0.11775	15.3463	-1.49293	0.155252	0.999313	-4.60227
Q58FG1		PMA:SMES	-0.221681	15.7532	-1.49172	0.155565	0.999313	-4.60365
Q658P3	STEAP3	PMA:SMES	0.205726	11.8168	1.49113	0.155719	0.999313	-4.60434
Q8NF50	DOCK8	PMA:SMES	-0.0979982	15.2939	-1.49085	0.15579	0.999313	-4.60465
Q3B726	POLR1F	PMA:SMES	0.31398	11.2635	1.49019	0.155963	0.999313	-4.60542
Q9H3H5	DPAGT1	PMA:SMES	0.508653	12.0599	1.48917	0.156228	0.999313	-4.60658
Q9H8S9	MOB1A	PMA:SMES	-0.278063	15.4673	-1.48843	0.156421	0.999313	-4.60744
O14867	BACH1	PMA:SMES	-0.286971	11.942	-1.48664	0.15689	0.999313	-4.6095
O95716	RAB3D	PMA:SMES	-0.2458	15.3756	-1.48616	0.157015	0.999313	-4.61005
Q13239	SLA	PMA:SMES	0.370998	12.1593	1.48393	0.157598	0.999313	-4.6126
O75976	CPD	PMA:SMES	0.26649	11.8458	1.48337	0.157745	0.999313	-4.61324
Q9BQ67	GRWD1	PMA:SMES	0.221586	11.065	1.4833	0.157765	0.999313	-4.61333
Q9UBB6	NCDN	PMA:SMES	0.271703	11.0041	1.4818	0.158159	0.999313	-4.61504
P42566	EPS15	PMA:SMES	-0.140004	14.3713	-1.48165	0.158197	0.999313	-4.61521
Q99523	SORT1	PMA:SMES	0.329694	11.228	1.48124	0.158307	0.999313	-4.61569
Q9UK41	VPS28	PMA:SMES	-0.190879	14.2758	-1.48119	0.158319	0.999313	-4.61574
O60739	EIF1B	PMA:SMES	-0.607136	10.961	-1.48077	0.158431	0.999313	-4.61622
P61073	CXCR4	PMA:SMES	-0.517114	10.2967	-1.47972	0.158706	0.999313	-4.61742
Q5FWF7	FBXO48	PMA:SMES	0.427493	12.0451	1.47884	0.15894	0.999313	-4.61843
Q96MU7	YTHDC1	PMA:SMES	-0.211372	12.7373	-1.4784	0.159056	0.999313	-4.61893
P46734	MAP2K3	PMA:SMES	-0.194363	14.8749	-1.4771	0.159399	0.999313	-4.62041
P62266	RPS23	PMA:SMES	0.29722	13.7997	1.47413	0.160189	0.999313	-4.62381
Q96B45	BORCS7	PMA:SMES	-0.214553	11.4938	-1.47408	0.160201	0.999313	-4.62386
P57053	LOC102724334	PMA:SMES	0.372192	20.8301	1.47374	0.160291	0.999313	-4.62425
Q99496	RNF2	PMA:SMES	0.254994	10.6482	1.47209	0.160733	0.999313	-4.62614
Q92506	HSD17B8	PMA:SMES	-0.15981	12.595	-1.47183	0.160802	0.999313	-4.62643
P80404	ABAT	PMA:SMES	0.403211	10.2398	1.47175	0.160822	0.999313	-4.62652
Q9H871	RMND5A	PMA:SMES	0.217545	11.0015	1.47064	0.161119	0.999313	-4.62779
Q9HD89	RETN	PMA:SMES	-0.400458	14.2182	-1.47051	0.161153	0.999313	-4.62793
Q9H4K7	MTG2	PMA:SMES	0.276181	10.7088	1.47033	0.161203	0.999313	-4.62814
O95721	SNAP29	PMA:SMES	-0.162181	13.1815	-1.47027	0.161218	0.999313	-4.62821
Q7L7V1	DHX32	PMA:SMES	0.461096	13.2436	1.47019	0.16124	0.999313	-4.6283
Q13405	MRPL49	PMA:SMES	-0.273821	18.2323	-1.46969	0.161374	0.999313	-4.62887
Q01484	ANK2	PMA:SMES	0.174783	13.0556	1.46952	0.161419	0.999313	-4.62906
Q9BWJ5	SF3B5	PMA:SMES	-0.257306	11.7692	-1.4694	0.16145	0.999313	-4.62919
Q15555	MAPRE2	PMA:SMES	-0.326852	11.9074	-1.46755	0.161945	0.999313	-4.6313
Q96P48	ARAP1	PMA:SMES	-0.12455	17.0686	-1.46731	0.162011	0.999313	-4.63157
Q10472	GALNT1	PMA:SMES	0.15132	13.0024	1.46629	0.162286	0.999313	-4.63274
Q9BZ68		PMA:SMES	-0.286727	12.3331	-1.46561	0.162467	0.999313	-4.6335
P41212	ETV6	PMA:SMES	-0.461458	9.54887	-1.46533	0.162543	0.999313	-4.63382
Q9Y2G9	SBNO2	PMA:SMES	0.486603	11.5373	1.46507	0.162614	0.999313	-4.63412
P60484	PTEN	PMA:SMES	0.179686	12.9593	1.46326	0.163102	0.999313	-4.63618
Q13151	HNRNPA0	PMA:SMES	-0.268373	13.2365	-1.46266	0.163264	0.999313	-4.63686
Q96GX5	MASTL	PMA:SMES	-0.240741	14.6275	-1.46199	0.163445	0.999313	-4.63762
P16591	FER	PMA:SMES	-0.155356	13.8789	-1.46197	0.16345	0.999313	-4.63764
Q8TD16	BICD2	PMA:SMES	-0.137586	13.1402	-1.46109	0.16369	0.999313	-4.63864
P20702	ITGAX	PMA:SMES	-0.279994	13.8848	-1.46108	0.163693	0.999313	-4.63865
Q68E01	INTS3	PMA:SMES	0.157594	13.1449	1.45903	0.164246	0.999313	-4.64096
Q8WZ82	OVCA2	PMA:SMES	0.195158	11.7676	1.4589	0.164282	0.999313	-4.64111
Q9UEY8	ADD3	PMA:SMES	-0.156789	16.1324	-1.45887	0.164291	0.999313	-4.64115
P14174	MIF	PMA:SMES	-0.163177	20.0964	-1.45794	0.164543	0.999313	-4.6422
Q13907	IDI1	PMA:SMES	-0.289376	10.7234	-1.45679	0.164858	0.999313	-4.64351
Q9Y2I8	WDR37	PMA:SMES	0.147123	13.2007	1.45565	0.165167	0.999313	-4.64479
Q13242	SRSF9	PMA:SMES	-0.204627	13.3228	-1.45565	0.165168	0.999313	-4.6448
Q92889	ERCC4	PMA:SMES	0.539776	10.2977	1.45529	0.165266	0.999313	-4.6452
Q96I99	SUCLG2	PMA:SMES	-0.108593	13.8353	-1.45448	0.165488	0.999313	-4.64612
Q8N5J2	MINDY1	PMA:SMES	-0.171076	13.5387	-1.45108	0.166418	0.999313	-4.64995
Q9NP72	RAB18	PMA:SMES	0.135827	16.817	1.45014	0.166675	0.999313	-4.65101
Q6NVY1	HIBCH	PMA:SMES	-0.292803	11.1872	-1.45013	0.166678	0.999313	-4.65102
P57075	UBASH3A	PMA:SMES	-0.18528	13.347	-1.44901	0.166987	0.999313	-4.65228
Q15019	SEPTIN2	PMA:SMES	-0.232449	13.5385	-1.44824	0.167199	0.999313	-4.65315
Q5T5Y3	CAMSAP1	PMA:SMES	-0.489057	10.3587	-1.4476	0.167377	0.999313	-4.65388
Q00341	HDLBP	PMA:SMES	-0.155256	12.4566	-1.44733	0.167451	0.999313	-4.65418
O00391	QSOX1	PMA:SMES	0.130241	16.6687	1.44627	0.167743	0.999313	-4.65537
Q9UK99	FBXO3	PMA:SMES	-0.310694	11.7544	-1.44535	0.167997	0.999313	-4.65641
Q8WWC4	MAIP1	PMA:SMES	0.278807	11.0071	1.44459	0.168208	0.999313	-4.65726
Q8NFA0	USP32	PMA:SMES	0.227736	10.9276	1.44398	0.168377	0.999313	-4.65795
P31930	UQCRC1	PMA:SMES	-0.145616	14.4257	-1.44396	0.168383	0.999313	-4.65797
Q96NJ6	ZFP3	PMA:SMES	0.370958	12.5771	1.44392	0.168394	0.999313	-4.65802
Q16595	FXN	PMA:SMES	0.284491	12.2356	1.44237	0.168825	0.999313	-4.65976
P62891	RPL39	PMA:SMES	0.32839	13.0605	1.44229	0.168847	0.999313	-4.65985
P46100	ATRX	PMA:SMES	-0.329349	12.5045	-1.44199	0.16893	0.999313	-4.66019
P02649	APOE	PMA:SMES	0.277232	11.0085	1.44148	0.169071	0.999313	-4.66076
Q9P1Z2	CALCOCO1	PMA:SMES	0.280698	11.7147	1.441	0.169206	0.999313	-4.6613
Q86X27	RALGPS2	PMA:SMES	-0.336692	10.8395	-1.44092	0.169229	0.999313	-4.66139
Q92879	CELF1	PMA:SMES	0.225294	13.0239	1.44035	0.169387	0.999313	-4.66203
Q9NZN3	EHD3	PMA:SMES	-0.191215	13.9775	-1.43955	0.16961	0.999313	-4.66293
Q14653	IRF3	PMA:SMES	0.125817	13.5064	1.43727	0.170247	0.999313	-4.66548
Q9BUR5	APOO	PMA:SMES	-0.268213	11.3151	-1.43719	0.170269	0.999313	-4.66557
Q15653	NFKBIB	PMA:SMES	0.550858	11.6377	1.43703	0.170312	0.999313	-4.66574
Q8N128	FAM177A1	PMA:SMES	-0.229708	11.1513	-1.43635	0.170503	0.999313	-4.66651
Q9NVI7	ATAD3A	PMA:SMES	-0.278448	12.3046	-1.43579	0.170662	0.999313	-4.66714
Q06187	BTK	PMA:SMES	0.116829	13.9079	1.43521	0.170824	0.999313	-4.66779
Q9HD23	MRS2	PMA:SMES	0.311075	11.8448	1.43507	0.170862	0.999313	-4.66794
Q0VD83	APOBR	PMA:SMES	-0.188187	16.0127	-1.435	0.170883	0.999313	-4.66802
Q5SWX8	ODR4	PMA:SMES	0.370907	10.5237	1.43383	0.17121	0.999313	-4.66933
Q12981	BNIP1	PMA:SMES	-0.225015	13.1311	-1.43338	0.171337	0.999313	-4.66983
Q96AB6	NTAN1	PMA:SMES	0.29673	13.5708	1.43303	0.171437	0.999313	-4.67023
Q8IUE6	H2AC21	PMA:SMES	0.656781	15.8178	1.43239	0.171616	0.999313	-4.67094
Q9NTG7	SIRT3	PMA:SMES	0.338348	11.7444	1.43135	0.17191	0.999313	-4.6721
Q9H0P0	NT5C3A	PMA:SMES	-0.181321	13.419	-1.43082	0.172057	0.999313	-4.67269
Q9H3K6	BOLA2	PMA:SMES	-0.214954	14.3516	-1.42933	0.172478	0.999313	-4.67435
Q9BWS9	CHID1	PMA:SMES	-0.234731	12.061	-1.42861	0.172683	0.999313	-4.67516
Q9Y673	ALG5	PMA:SMES	-0.208928	12.164	-1.42826	0.172782	0.999313	-4.67555
P78364	PHC1	PMA:SMES	-0.483789	10.9738	-1.42781	0.172909	0.999313	-4.67605
P18074	ERCC2	PMA:SMES	-0.387448	10.0234	-1.42756	0.172981	0.999313	-4.67633
Q9HBF4	ZFYVE1	PMA:SMES	0.149084	12.2506	1.42729	0.173055	0.999313	-4.67662
P49459	UBE2A	PMA:SMES	-0.19475	12.563	-1.42562	0.173531	0.999313	-4.67849
Q96NB2	SFXN2	PMA:SMES	0.183196	12.1274	1.42467	0.1738	0.999313	-4.67954
Q9Y5X1	SNX9	PMA:SMES	0.1277	12.9194	1.42387	0.174028	0.999313	-4.68044
Q9NRD1	FBXO6	PMA:SMES	-0.276216	11.3605	-1.42328	0.174196	0.999313	-4.68109
Q9H8T0	AKTIP	PMA:SMES	0.177899	12.0698	1.42261	0.174389	0.999313	-4.68184
P08069	IGF1R	PMA:SMES	0.255853	10.6059	1.42226	0.174489	0.999313	-4.68223
Q6ZS11	RINL	PMA:SMES	0.21652	11.8068	1.42125	0.174777	0.999313	-4.68335
A8MVS5	C19orf38	PMA:SMES	0.277266	15.0892	1.42124	0.174778	0.999313	-4.68336
Q14739	LBR	PMA:SMES	-0.207107	17.2422	-1.42093	0.174868	0.999313	-4.68371
P63151	PPP2R2A	PMA:SMES	-0.19703	12.9994	-1.41997	0.175142	0.999313	-4.68477
P52790	HK3	PMA:SMES	0.381367	12.6188	1.41997	0.175144	0.999313	-4.68478
Q13496	MTM1	PMA:SMES	0.138797	12.4287	1.41979	0.175193	0.999313	-4.68497
O15056	SYNJ2	PMA:SMES	0.404827	10.9336	1.4188	0.175477	0.999313	-4.68607
O15021	MAST4	PMA:SMES	0.180845	15.6823	1.41869	0.175508	0.999313	-4.68619
P04181	OAT	PMA:SMES	0.159595	16.7502	1.41848	0.175569	0.999313	-4.68642
Q9P000	COMMD9	PMA:SMES	-0.173458	12.4348	-1.41707	0.175973	0.999313	-4.68798
Q9BXR0	QTRT1	PMA:SMES	-0.165545	12.3742	-1.41653	0.176129	0.999313	-4.68859
Q8WVC0	LEO1	PMA:SMES	-0.242423	11.3595	-1.41619	0.176227	0.999313	-4.68896
Q96QF0	RAB3IP	PMA:SMES	0.233959	11.3539	1.41415	0.176816	0.999313	-4.69123
Q8WWY3	PRPF31	PMA:SMES	-0.129212	13.9692	-1.4134	0.177033	0.999313	-4.69206
Q8N1S5	SLC39A11	PMA:SMES	0.177904	13.2753	1.41335	0.177046	0.999313	-4.69211
Q8N6T3	ARFGAP1	PMA:SMES	-0.194217	11.9805	-1.41316	0.177101	0.999313	-4.69232
Q9HCC0	MCCC2	PMA:SMES	-0.168365	12.5924	-1.41244	0.17731	0.999313	-4.69312
Q9Y228	TRAF3IP3	PMA:SMES	0.178639	13.7308	1.4117	0.177523	0.999313	-4.69393
P20592	MX2	PMA:SMES	0.119707	13.607	1.41168	0.177528	0.999313	-4.69395
Q92729	PTPRU	PMA:SMES	0.24793	15.5626	1.41155	0.177568	0.999313	-4.6941
O94953	KDM4B	PMA:SMES	-0.270881	10.7466	-1.4099	0.178045	0.999313	-4.69592
A6QL63	ABTB3	PMA:SMES	0.41129	11.8087	1.40956	0.178144	0.999313	-4.6963
Q96EQ0	SGTB	PMA:SMES	-0.211625	13.0588	-1.40859	0.178425	0.999313	-4.69737
Q9BZG1	RAB34	PMA:SMES	-0.129556	12.4303	-1.40852	0.178447	0.999313	-4.69745
O60664	PLIN3	PMA:SMES	-0.170806	16.438	-1.40833	0.178501	0.999313	-4.69766
P32780	GTF2H1	PMA:SMES	0.486157	9.74334	1.40592	0.179204	0.999313	-4.70032
Q6IPX3		PMA:SMES	-0.365381	12.1396	-1.40559	0.1793	0.999313	-4.70068
P33241	LSP1	PMA:SMES	-0.285629	16.9893	-1.40533	0.179374	0.999313	-4.70096
Q9Y624	F11R	PMA:SMES	0.145673	14.6832	1.40423	0.179697	0.999313	-4.70217
P04066	FUCA1	PMA:SMES	-0.116635	14.545	-1.40311	0.180024	0.999313	-4.70341
O75882	ATRN	PMA:SMES	0.382485	10.4458	1.40297	0.180065	0.999313	-4.70356
Q9GZZ9	UBA5	PMA:SMES	-0.262639	12.3608	-1.40292	0.180081	0.999313	-4.70362
Q8IV04	TBC1D10C	PMA:SMES	-0.144193	14.8247	-1.40082	0.180698	0.999313	-4.70593
P50613	CDK7	PMA:SMES	0.214287	10.9989	1.40068	0.180738	0.999313	-4.70608
Q05086	UBE3A	PMA:SMES	0.201917	12.0024	1.39911	0.181198	0.999313	-4.7078
Q5TFE4	NT5DC1	PMA:SMES	-0.199717	12.0364	-1.39846	0.181391	0.999313	-4.70852
Q9UJ83	HACL1	PMA:SMES	-0.362381	11.2447	-1.39829	0.18144	0.999313	-4.7087
Q9Y3E5	PTRH2	PMA:SMES	-0.36697	9.46922	-1.39814	0.181486	0.999313	-4.70887
O00409	FOXN3	PMA:SMES	-0.253026	11.794	-1.39794	0.181544	0.999313	-4.70909
O60499	STX10	PMA:SMES	-0.425652	10.727	-1.3978	0.181586	0.999313	-4.70924
P11308	ERG	PMA:SMES	-0.43446	10.3239	-1.39698	0.181828	0.999313	-4.71015
Q68DY1	ZNF626	PMA:SMES	-0.220025	13.2467	-1.39693	0.181841	0.999313	-4.71019
P30679	GNA15	PMA:SMES	-0.327057	14.0606	-1.39587	0.182155	0.999313	-4.71136
Q15751	HERC1	PMA:SMES	0.39738	10.7811	1.39546	0.182276	0.999313	-4.71181
O43805	SSNA1	PMA:SMES	-0.426301	10.2943	-1.3954	0.182295	0.999313	-4.71188
Q9NRL3	STRN4	PMA:SMES	-0.171553	12.9227	-1.39457	0.18254	0.999313	-4.71278
Q7Z6K3	PTAR1	PMA:SMES	0.207131	11.3835	1.39393	0.182729	0.999313	-4.71349
A6NMX2	EIF4E1B	PMA:SMES	0.261005	11.361	1.39386	0.182751	0.999313	-4.71357
Q86WG5	SBF2	PMA:SMES	0.242941	12.5264	1.39144	0.18347	0.999313	-4.71622
Q96T23	RSF1	PMA:SMES	-0.360657	10.374	-1.39142	0.183475	0.999313	-4.71623
P09326	CD48	PMA:SMES	0.254	14.3805	1.38805	0.184478	0.999313	-4.71991
Q9NVG8	TBC1D13	PMA:SMES	-0.127845	13.6085	-1.38763	0.184604	0.999313	-4.72037
Q6DN12	MCTP2	PMA:SMES	0.317104	11.7271	1.3862	0.185034	0.999313	-4.72194
P55039	DRG2	PMA:SMES	-0.130625	12.9621	-1.38512	0.185357	0.999313	-4.72312
P26447	S100A4	PMA:SMES	0.163147	18.6265	1.38426	0.185613	0.999313	-4.72405
O95182	NDUFA7	PMA:SMES	0.290589	12.6522	1.38413	0.185654	0.999313	-4.72419
Q6VN20	RANBP10	PMA:SMES	0.324261	10.8158	1.38404	0.18568	0.999313	-4.72429
P50995	ANXA11	PMA:SMES	-0.124994	18.0454	-1.38358	0.185817	0.999313	-4.72479
Q16629	SRSF7	PMA:SMES	0.118139	15.9473	1.38327	0.185912	0.999313	-4.72513
Q9NX58	LYAR	PMA:SMES	0.323195	12.8189	1.38258	0.186119	0.999313	-4.72588
Q4KMP7	TBC1D10B	PMA:SMES	-0.153359	13.1112	-1.38248	0.186149	0.999313	-4.72599
Q6P9B9	INTS5	PMA:SMES	-0.191481	11.9413	-1.38205	0.186278	0.999313	-4.72645
Q8NFP9	NBEA	PMA:SMES	-0.195898	12.2006	-1.38187	0.186333	0.999313	-4.72665
Q9NQG7	HPS4	PMA:SMES	0.399175	12.7227	1.38111	0.186562	0.999313	-4.72748
Q9BQF6	SENP7	PMA:SMES	0.207194	11.805	1.38029	0.186811	0.999313	-4.72838
Q9P2E5	CHPF2	PMA:SMES	0.298129	15.3852	1.37938	0.187085	0.999313	-4.72936
Q92917	GPKOW	PMA:SMES	-0.210655	11.558	-1.37859	0.187323	0.999313	-4.73022
O15127	SCAMP2	PMA:SMES	-0.339662	13.181	-1.37579	0.18817	0.999313	-4.73325
Q96G01	BICD1	PMA:SMES	0.309549	11.7724	1.37532	0.188315	0.999313	-4.73377
P23610	F8A1	PMA:SMES	0.249381	12.2385	1.37525	0.188336	0.999313	-4.73385
P12004	PCNA	PMA:SMES	-0.129899	14.015	-1.37476	0.188485	0.999313	-4.73438
Q13619	CUL4A	PMA:SMES	0.221925	11.978	1.37191	0.189353	0.999313	-4.73747
Q92686	NRGN	PMA:SMES	-0.195869	11.5188	-1.36952	0.190083	0.999313	-4.74005
Q8IWK6	ADGRA3	PMA:SMES	-0.321445	11.7602	-1.36918	0.190187	0.999313	-4.74042
Q96KG9	SCYL1	PMA:SMES	-0.153164	11.8279	-1.36877	0.190311	0.999313	-4.74085
P00480	OTC	PMA:SMES	0.517864	12.0604	1.36752	0.190696	0.999313	-4.74221
O75330	HMMR	PMA:SMES	0.266564	11.746	1.36559	0.191289	0.999313	-4.74429
P61758	VBP1	PMA:SMES	0.126163	13.6559	1.36549	0.19132	0.999313	-4.7444
P68371	TUBB4B	PMA:SMES	-0.332161	15.5778	-1.36525	0.191394	0.999313	-4.74466
Q92609	TBC1D5	PMA:SMES	-0.127119	13.8403	-1.36407	0.191757	0.999313	-4.74593
P51991	HNRNPA3	PMA:SMES	-0.119981	15.8709	-1.3639	0.191808	0.999313	-4.74611
Q9GZY6	LAT2	PMA:SMES	-0.259351	12.5635	-1.36328	0.192	0.999313	-4.74678
Q9NUL5	SHFL	PMA:SMES	1.00984	10.6898	1.36249	0.192244	0.999313	-4.74763
Q9Y6K0	CEPT1	PMA:SMES	0.160426	14.5562	1.36235	0.192288	0.999313	-4.74778
Q2TAY7	SMU1	PMA:SMES	0.144928	13.9	1.36159	0.192524	0.999313	-4.7486
Q96PC5	MIA2	PMA:SMES	-0.216964	11.9112	-1.36153	0.192541	0.999313	-4.74866
Q9Y6M4	CSNK1G3	PMA:SMES	-0.22687	12.4736	-1.36131	0.19261	0.999313	-4.7489
Q92542	NCSTN	PMA:SMES	0.147096	14.1204	1.35851	0.193476	0.999313	-4.75191
Q2Q1W2	TRIM71	PMA:SMES	-0.355077	12.4981	-1.35817	0.193583	0.999313	-4.75228
Q9H3P7	ACBD3	PMA:SMES	-0.136735	12.5945	-1.35752	0.193784	0.999313	-4.75297
Q15276	RABEP1	PMA:SMES	-0.162101	11.764	-1.3574	0.193821	0.999313	-4.7531
O14686	KMT2D	PMA:SMES	-0.306302	10.4467	-1.35571	0.194347	0.999313	-4.75491
O43237	DYNC1LI2	PMA:SMES	-0.298455	10.2213	-1.3557	0.194351	0.999313	-4.75493
P53367	ARFIP1	PMA:SMES	-0.219372	13.2411	-1.3555	0.194413	0.999313	-4.75514
Q8NB37	GATD1	PMA:SMES	0.349555	13.8128	1.3553	0.194476	0.999313	-4.75536
Q8TE02	ELP5	PMA:SMES	0.250462	11.6057	1.35481	0.194628	0.999313	-4.75588
Q96T51	RUFY1	PMA:SMES	-0.126245	14.2018	-1.35405	0.194866	0.999313	-4.7567
Q14019	COTL1	PMA:SMES	0.16614	14.7365	1.35286	0.195238	0.999313	-4.75797
P34059	GALNS	PMA:SMES	0.123551	15.5362	1.3528	0.195255	0.999313	-4.75803
O94921	CDK14	PMA:SMES	0.358247	10.7141	1.35278	0.195263	0.999313	-4.75806
O00560	SDCBP	PMA:SMES	-0.211612	15.4988	-1.35264	0.195307	0.999313	-4.75821
Q16643	DBN1	PMA:SMES	-0.337086	10.6322	-1.35154	0.19565	0.999313	-4.75938
Q9UPN9	TRIM33	PMA:SMES	-0.142394	11.8983	-1.35082	0.195877	0.999313	-4.76016
P42685	FRK	PMA:SMES	0.204709	15.0316	1.35062	0.195938	0.999313	-4.76037
P51606	RENBP	PMA:SMES	-0.4016	11.2344	-1.35044	0.195994	0.999313	-4.76056
Q9H9P8	L2HGDH	PMA:SMES	-0.218222	11.5856	-1.35028	0.196045	0.999313	-4.76073
Q7L014	DDX46	PMA:SMES	-0.121583	14.0551	-1.35009	0.196105	0.999313	-4.76094
Q8TCS8	PNPT1	PMA:SMES	0.166216	11.9663	1.3495	0.196289	0.999313	-4.76156
Q9BVG4	PBDC1	PMA:SMES	-0.143007	14.0783	-1.34928	0.196361	0.999313	-4.76181
Q15654	TRIP6	PMA:SMES	0.379409	9.92874	1.34907	0.196426	0.999313	-4.76203
P49327	FASN	PMA:SMES	-0.0887298	17.499	-1.3487	0.19654	0.999313	-4.76242
Q15126	PMVK	PMA:SMES	0.212326	12.8299	1.34777	0.196835	0.999313	-4.76342
Q8IZQ1	WDFY3	PMA:SMES	-0.104089	12.6989	-1.34729	0.196984	0.999313	-4.76392
Q96EK6	GNPNAT1	PMA:SMES	0.201532	11.8179	1.34542	0.197574	0.999313	-4.76592
Q9Y5S8	NOX1	PMA:SMES	-0.190857	15.9576	-1.34503	0.197699	0.999313	-4.76634
Q92800	EZH1	PMA:SMES	0.339777	9.93857	1.34497	0.197718	0.999313	-4.76641
O60674	JAK2	PMA:SMES	0.209162	11.7009	1.34475	0.197785	0.999313	-4.76663
Q8IU68	TMC8	PMA:SMES	0.289608	12.8583	1.34396	0.198038	0.999313	-4.76748
Q8NFF5	FLAD1	PMA:SMES	0.130923	11.8779	1.34376	0.198101	0.999313	-4.7677
O95292	VAPB	PMA:SMES	-0.188454	16.159	-1.34237	0.19854	0.999313	-4.76917
Q08379	GOLGA2	PMA:SMES	-0.173226	12.5311	-1.3423	0.198562	0.999313	-4.76925
Q9Y2Y9	KLF13	PMA:SMES	-0.33162	10.7221	-1.34213	0.198615	0.999313	-4.76943
Q8N1F8	STK11IP	PMA:SMES	0.124836	12.5539	1.34121	0.198909	0.999313	-4.77041
P19440	GGT1	PMA:SMES	0.175875	13.2021	1.3412	0.198912	0.999313	-4.77042
E9PRG8		PMA:SMES	-0.393825	12.6877	-1.34021	0.199227	0.999313	-4.77147
A5A3E0	POTEF	PMA:SMES	-0.154421	21.4986	-1.33984	0.199343	0.999313	-4.77186
O75925	PIAS1	PMA:SMES	0.220077	12.8071	1.33937	0.199494	0.999313	-4.77237
Q86X76	NIT1	PMA:SMES	-0.141746	13.834	-1.33926	0.199528	0.999313	-4.77248
Q7Z2W9	MRPL21	PMA:SMES	0.221779	12.3262	1.33804	0.199917	0.999313	-4.77378
P12429	ANXA3	PMA:SMES	-0.22145	20.0479	-1.33787	0.199969	0.999313	-4.77395
Q9BUP0	EFHD1	PMA:SMES	-0.215968	14.5135	-1.33775	0.200009	0.999313	-4.77409
P49821	NDUFV1	PMA:SMES	0.12075	13.7731	1.33734	0.20014	0.999313	-4.77452
P42680	TEC	PMA:SMES	0.222517	11.7034	1.33709	0.200219	0.999313	-4.77478
P18433	PTPRA	PMA:SMES	0.14694	12.0386	1.33648	0.200415	0.999313	-4.77544
Q8NEZ5	FBXO22	PMA:SMES	-0.23031	12.4709	-1.33634	0.20046	0.999313	-4.77558
O14879	IFIT3	PMA:SMES	-0.1601	13.7654	-1.33624	0.200492	0.999313	-4.77569
O75436	VPS26A	PMA:SMES	0.1033	15.7281	1.33618	0.200509	0.999313	-4.77575
Q9P2P1	NYNRIN	PMA:SMES	-0.271779	13.1293	-1.33572	0.200658	0.999313	-4.77624
Q9Y4B6	DCAF1	PMA:SMES	0.274663	10.0505	1.33461	0.201011	0.999313	-4.77741
Q6P996	PDXDC1	PMA:SMES	-0.121437	12.294	-1.33441	0.201076	0.999313	-4.77763
Q9C0D3	ZYG11B	PMA:SMES	-0.2518	10.9993	-1.3317	0.201945	0.999313	-4.7805
Q5JRA6	MIA3	PMA:SMES	0.122256	14.4911	1.3317	0.201946	0.999313	-4.7805
P29992	GNA11	PMA:SMES	0.182448	15.0616	1.33166	0.20196	0.999313	-4.78055
P17844	DDX5	PMA:SMES	-0.0955999	16.5883	-1.33113	0.202128	0.999313	-4.7811
Q9NWW5	CLN6	PMA:SMES	-0.284918	12.9591	-1.33098	0.202178	0.999313	-4.78126
P46019	PHKA2	PMA:SMES	-0.108955	14.4889	-1.32846	0.202989	0.999313	-4.78392
Q9NVP1	DDX18	PMA:SMES	-0.133227	13.6983	-1.32772	0.203226	0.999313	-4.7847
Q99460	PSMD1	PMA:SMES	-0.102809	14.9319	-1.32672	0.20355	0.999313	-4.78576
Q96JP5	ZFP91	PMA:SMES	-0.62438	10.0349	-1.32556	0.203925	0.999313	-4.78698
P82663	MRPS25	PMA:SMES	-0.330773	10.4457	-1.32534	0.203997	0.999313	-4.78721
Q9UKR5	ERG28	PMA:SMES	-0.212924	12.6487	-1.32522	0.204036	0.999313	-4.78734
Q96LD8	SENP8	PMA:SMES	0.35415	10.385	1.322	0.205083	0.999313	-4.79074
Q76L83	ASXL2	PMA:SMES	-0.137533	14.1206	-1.32057	0.205549	0.999313	-4.79224
Q7Z2E3	APTX	PMA:SMES	0.271874	11.3015	1.32055	0.205553	0.999313	-4.79226
P82930	MRPS34	PMA:SMES	-0.210676	11.8192	-1.31933	0.205953	0.999313	-4.79354
Q9BTD8	RBM42	PMA:SMES	-0.22587	11.6938	-1.31785	0.206435	0.999313	-4.7951
P60468	SEC61B	PMA:SMES	-0.300968	11.3521	-1.31685	0.206761	0.999313	-4.79614
P35610	SOAT1	PMA:SMES	0.321434	10.9657	1.31672	0.206806	0.999313	-4.79629
O15321	TM9SF1	PMA:SMES	0.390752	10.6859	1.3158	0.207108	0.999313	-4.79725
Q6JBY9	RCSD1	PMA:SMES	-0.212614	14.3313	-1.31572	0.207134	0.999313	-4.79733
Q92733	PRCC	PMA:SMES	-0.298661	10.7271	-1.31473	0.207458	0.999313	-4.79837
Q9NPD3	EXOSC4	PMA:SMES	-0.21303	12.9231	-1.31413	0.207656	0.999313	-4.799
Q7Z6I6	ARHGAP30	PMA:SMES	-0.128561	14.8365	-1.31409	0.207666	0.999313	-4.79903
P17026	ZNF22	PMA:SMES	-0.234681	12.8488	-1.31352	0.207854	0.999313	-4.79963
Q15006	EMC2	PMA:SMES	0.291135	12.2534	1.31319	0.207963	0.999313	-4.79998
P60228	EIF3E	PMA:SMES	-0.125717	14.917	-1.31072	0.208777	0.999313	-4.80256
P22314	UBA1	PMA:SMES	-0.128875	17.0187	-1.31065	0.208801	0.999313	-4.80264
O43920	NDUFS5	PMA:SMES	0.165851	13.3992	1.31055	0.208834	0.999313	-4.80274
Q96KR6	FAM210B	PMA:SMES	-0.389093	10.4326	-1.30932	0.209239	0.999313	-4.80403
Q6P5R6	RPL22L1	PMA:SMES	0.369459	17.9258	1.30899	0.20935	0.999313	-4.80437
Q8NCJ5	SPRYD3	PMA:SMES	-0.310057	11.7372	-1.30875	0.209428	0.999313	-4.80462
P00352	ALDH1A1	PMA:SMES	0.172984	14.4523	1.30871	0.209443	0.999313	-4.80467
P62888	RPL30	PMA:SMES	0.11533	15.6633	1.30865	0.209462	0.999313	-4.80473
B2RTY4	MYO9A	PMA:SMES	0.326863	13.1238	1.3086	0.209479	0.999313	-4.80478
Q99828	CIB1	PMA:SMES	-0.164865	13.832	-1.30789	0.209714	0.999313	-4.80552
P56282	POLE2	PMA:SMES	0.586666	10.7524	1.30787	0.209719	0.999313	-4.80554
Q13228	SELENBP1	PMA:SMES	-0.346158	11.7319	-1.30784	0.209729	0.999313	-4.80557
Q9P0L0	VAPA	PMA:SMES	-0.237001	14.2375	-1.30693	0.21003	0.999313	-4.80652
O95793	STAU1	PMA:SMES	0.296114	12.0402	1.30688	0.210046	0.999313	-4.80657
P36897	TGFBR1	PMA:SMES	-0.307458	13.0547	-1.30655	0.210158	0.999313	-4.80692
O75844	ZMPSTE24	PMA:SMES	0.147036	14.4442	1.30647	0.210184	0.999313	-4.80701
Q9BZK7	TBL1XR1	PMA:SMES	0.117813	13.3148	1.30394	0.211025	0.999313	-4.80964
O43264	ZW10	PMA:SMES	0.175874	11.6875	1.3011	0.21197	0.999313	-4.81259
P30154	PPP2R1B	PMA:SMES	0.14543	12.2699	1.30098	0.212011	0.999313	-4.81272
Q15154	PCM1	PMA:SMES	0.246758	13.9411	1.29997	0.212349	0.999313	-4.81377
Q7Z6J0	SH3RF1	PMA:SMES	-0.299092	11.7517	-1.29956	0.212485	0.999313	-4.81419
Q9BZE4	GTPBP4	PMA:SMES	-0.220515	12.6714	-1.29937	0.21255	0.999313	-4.81439
Q9NR48	ASH1L	PMA:SMES	-0.126641	14.7558	-1.2993	0.212571	0.999313	-4.81446
Q9H9Q4	NHEJ1	PMA:SMES	0.440689	10.8323	1.29889	0.212711	0.999313	-4.81489
Q9BUL8	PDCD10	PMA:SMES	0.128879	16.1153	1.29815	0.212959	0.999313	-4.81566
P52739	ZNF131	PMA:SMES	-0.302763	13.9673	-1.29809	0.212979	0.999313	-4.81572
Q14088	RAB33A	PMA:SMES	-0.133165	13.916	-1.29632	0.213572	0.999313	-4.81755
Q8N142	ADSS1	PMA:SMES	-0.624161	11.5096	-1.29601	0.213677	0.999313	-4.81788
P11279	LAMP1	PMA:SMES	0.282843	16.7578	1.2943	0.214251	0.999313	-4.81965
P49593	PPM1F	PMA:SMES	-0.0938363	13.8455	-1.29407	0.214329	0.999313	-4.81989
Q96GS4	BORCS6	PMA:SMES	-0.146645	13.3758	-1.29369	0.214457	0.999313	-4.82028
Q9NQ48	LZTFL1	PMA:SMES	0.166582	12.6376	1.29342	0.214548	0.999313	-4.82056
Q9NP66	HMG20A	PMA:SMES	-0.395816	9.62016	-1.29299	0.214694	0.999313	-4.82101
Q9NVD7	PARVA	PMA:SMES	-0.371379	11.678	-1.29297	0.214699	0.999313	-4.82102
Q99615	DNAJC7	PMA:SMES	-0.141984	13.2876	-1.29283	0.214746	0.999313	-4.82117
P37108	SRP14	PMA:SMES	-0.269901	13.2156	-1.2919	0.215062	0.999313	-4.82213
O00743	PPP6C	PMA:SMES	-0.122644	14.8518	-1.29162	0.215157	0.999313	-4.82242
Q9UNH7	SNX6	PMA:SMES	-0.121857	13.8179	-1.29131	0.215259	0.999313	-4.82273
Q9Y680	FKBP7	PMA:SMES	0.376872	9.04543	1.28888	0.216084	0.999313	-4.82525
Q9BXP2	SLC12A9	PMA:SMES	-0.112126	12.71	-1.28748	0.216559	0.999313	-4.8267
Q14562	DHX8	PMA:SMES	-0.181474	11.5134	-1.28715	0.216669	0.999313	-4.82703
O75347	TBCA	PMA:SMES	0.15557	16.7816	1.28638	0.216933	0.999313	-4.82783
Q99877	H2BC15	PMA:SMES	0.509306	16.7093	1.28539	0.217269	0.999313	-4.82885
Q96MV1	TLCD4	PMA:SMES	0.295915	11.0733	1.28526	0.217313	0.999313	-4.82898
Q9BUE0	MED18	PMA:SMES	-0.262908	11.203	-1.28452	0.217566	0.999313	-4.82974
Q7Z2W4	ZC3HAV1	PMA:SMES	-0.129095	13.5087	-1.28422	0.217669	0.999313	-4.83005
O43929	ORC4	PMA:SMES	0.17902	11.355	1.28354	0.217901	0.999313	-4.83075
Q8N5I2	ARRDC1	PMA:SMES	0.175059	12.9251	1.28354	0.217901	0.999313	-4.83075
Q99575	POP1	PMA:SMES	-0.192294	10.8539	-1.28307	0.21806	0.999313	-4.83123
P02751	FN1	PMA:SMES	0.416251	11.7918	1.28299	0.218089	0.999313	-4.83132
Q8TAD4	SLC30A5	PMA:SMES	-0.31092	10.1068	-1.2826	0.218222	0.999313	-4.83172
P09382	LGALS1	PMA:SMES	-0.195876	15.316	-1.28248	0.218261	0.999313	-4.83184
Q86W50	METTL16	PMA:SMES	-0.333381	11.2951	-1.28209	0.218396	0.999313	-4.83224
P18669	PGAM1	PMA:SMES	-0.158806	17.7616	-1.28184	0.21848	0.999313	-4.83249
Q9HBH5	RDH14	PMA:SMES	0.211394	12.1258	1.28102	0.21876	0.999313	-4.83334
Q53FT3	HIKESHI	PMA:SMES	-0.154748	12.8635	-1.27963	0.219236	0.999313	-4.83476
P09622	DLD	PMA:SMES	0.130313	13.9953	1.27866	0.219572	0.999313	-4.83577
Q13084	MRPL28	PMA:SMES	-0.260244	11.9958	-1.27859	0.219594	0.999313	-4.83583
P50148	GNAQ	PMA:SMES	-0.179858	15.3499	-1.2775	0.21997	0.999313	-4.83695
Q9BYX7		PMA:SMES	0.377396	10.9945	1.27571	0.220585	0.999313	-4.83878
Q3KR37	GRAMD1B	PMA:SMES	-0.198243	11.1518	-1.27559	0.220627	0.999313	-4.83891
Q05084	ICA1	PMA:SMES	-0.456991	10.2499	-1.27507	0.220805	0.999313	-4.83944
O75787	ATP6AP2	PMA:SMES	0.146205	14.4505	1.27407	0.22115	0.999313	-4.84046
Q99933	BAG1	PMA:SMES	-0.17956	12.5069	-1.27368	0.221285	0.999313	-4.84086
Q16828	DUSP6	PMA:SMES	-0.421975	12.3779	-1.27347	0.22136	0.999313	-4.84108
P56524	HDAC4	PMA:SMES	-0.122129	12.73	-1.27245	0.221712	0.999313	-4.84212
Q9BXB7	SPATA16	PMA:SMES	0.358307	16.6971	1.27227	0.221774	0.999313	-4.8423
P36915	GNL1	PMA:SMES	0.124698	12.8408	1.27186	0.221915	0.999313	-4.84272
Q9BYJ9	YTHDF1	PMA:SMES	0.223128	11.6293	1.27161	0.222002	0.999313	-4.84298
Q9H1I8	ASCC2	PMA:SMES	0.143929	12.1845	1.27116	0.222159	0.999313	-4.84344
Q9NUM4	TMEM106B	PMA:SMES	-0.210064	11.2169	-1.27108	0.222186	0.999313	-4.84352
Q8NFU3	TSTD1	PMA:SMES	-0.41852	10.6401	-1.27035	0.222438	0.999313	-4.84426
P12236	SLC25A6	PMA:SMES	-0.186802	14.0841	-1.27002	0.222553	0.999313	-4.8446
Q9UJC5	SH3BGRL2	PMA:SMES	-0.170129	11.2672	-1.26941	0.222766	0.999313	-4.84522
Q9BW60	ELOVL1	PMA:SMES	-0.233798	11.3069	-1.26666	0.22372	0.999313	-4.84802
P61204	ARF3	PMA:SMES	-0.32298	14.5115	-1.26656	0.223758	0.999313	-4.84813
Q96GX9	APIP	PMA:SMES	-0.122039	14.4105	-1.26647	0.223786	0.999313	-4.84821
P51178	PLCD1	PMA:SMES	-0.11179	13.0266	-1.26581	0.224019	0.999313	-4.84889
Q96Q89	KIF20B	PMA:SMES	0.310939	12.2944	1.26519	0.224235	0.999313	-4.84952
Q8N3X1	FNBP4	PMA:SMES	0.146412	13.576	1.26503	0.224289	0.999313	-4.84968
Q96ER9	CCDC51	PMA:SMES	0.352465	9.55858	1.26376	0.224734	0.999313	-4.85097
P62318	SNRPD3	PMA:SMES	0.277097	16.6159	1.26368	0.224761	0.999313	-4.85105
Q96IY1	NSL1	PMA:SMES	-0.202622	11.7953	-1.26195	0.225367	0.999313	-4.85281
P51151	RAB9A	PMA:SMES	-0.162989	13.1678	-1.26177	0.225432	0.999313	-4.853
Q9Y478	PRKAB1	PMA:SMES	0.286187	14.3995	1.26169	0.225457	0.999313	-4.85307
P01040	CSTA	PMA:SMES	-0.488471	15.8762	-1.26169	0.225459	0.999313	-4.85308
O75427	LRCH4	PMA:SMES	-0.124651	13.8839	-1.2606	0.22584	0.999313	-4.85418
Q9Y646	CPQ	PMA:SMES	0.296487	10.7145	1.26047	0.225888	0.999313	-4.85432
P05546	SERPIND1	PMA:SMES	0.312916	11.9857	1.25991	0.226085	0.999313	-4.85488
Q01105	SET	PMA:SMES	-0.178614	11.2814	-1.25978	0.226129	0.999313	-4.85501
Q96JJ7	TMX3	PMA:SMES	0.178313	13.5861	1.25964	0.226178	0.999313	-4.85515
Q9H1B7	IRF2BPL	PMA:SMES	-0.231711	11.1267	-1.25962	0.226185	0.999313	-4.85517
O96011	PEX11B	PMA:SMES	-0.181274	13.4161	-1.25955	0.226209	0.999313	-4.85524
P52209	PGD	PMA:SMES	-0.111647	19.6853	-1.25837	0.226626	0.999313	-4.85644
Q04726	TLE3	PMA:SMES	0.138308	13.63	1.25744	0.226954	0.999313	-4.85739
Q9UIF9	BAZ2A	PMA:SMES	0.442075	9.77914	1.25737	0.226979	0.999313	-4.85746
P01889	HLA-B	PMA:SMES	0.245887	14.4318	1.25613	0.227416	0.999313	-4.85871
Q99459	CDC5L	PMA:SMES	-0.115145	14.0772	-1.2557	0.227567	0.999313	-4.85914
Q99805	TM9SF2	PMA:SMES	0.133951	13.3719	1.25487	0.227859	0.999313	-4.85998
O95197	RTN3	PMA:SMES	0.287482	17.0335	1.25482	0.227879	0.999313	-4.86003
Q01518	CAP1	PMA:SMES	-0.0971726	20.1816	-1.25363	0.228298	0.999313	-4.86123
Q13469	NFATC2	PMA:SMES	-0.21653	11.0963	-1.2534	0.228382	0.999313	-4.86147
Q96ME7	ZNF512	PMA:SMES	-0.14314	12.3377	-1.25291	0.228554	0.999313	-4.86196
Q9Y6M9	NDUFB9	PMA:SMES	-0.27404	11.2471	-1.25289	0.228563	0.999313	-4.86198
O15145	ARPC3	PMA:SMES	-0.104219	17.9091	-1.25252	0.228694	0.999313	-4.86236
O15126	SCAMP1	PMA:SMES	-0.196706	13.1902	-1.25101	0.229227	0.999313	-4.86387
Q96IV0	NGLY1	PMA:SMES	-0.126034	13.0336	-1.25096	0.229245	0.999313	-4.86392
P46060	RANGAP1	PMA:SMES	-0.101337	13.6076	-1.25072	0.229331	0.999313	-4.86417
O15211	RGL2	PMA:SMES	-0.16403	11.9208	-1.2507	0.229339	0.999313	-4.86419
Q9UHC7	MKRN1	PMA:SMES	-0.434872	10.6412	-1.2494	0.229802	0.999313	-4.8655
Q9P2X3	IMPACT	PMA:SMES	0.233454	11.5441	1.24911	0.229903	0.999313	-4.86579
Q8NFH3	NUP43	PMA:SMES	-0.126191	13.4318	-1.24831	0.230187	0.999313	-4.86659
Q9NQB0	TCF7L2	PMA:SMES	-0.294865	11.6734	-1.24804	0.230286	0.999313	-4.86687
Q96N66	MBOAT7	PMA:SMES	0.226831	15.21	1.24676	0.23074	0.999313	-4.86815
O15173	PGRMC2	PMA:SMES	0.1868	14.1894	1.24674	0.230747	0.999313	-4.86817
P09914	IFIT1	PMA:SMES	0.361454	11.0831	1.24593	0.231038	0.999313	-4.86899
P08397	HMBS	PMA:SMES	0.189863	11.8785	1.24533	0.231253	0.999313	-4.86959
Q7RTN6	STRADA	PMA:SMES	-0.298095	11.5841	-1.24391	0.231761	0.999313	-4.87102
Q7Z4Q2	HEATR3	PMA:SMES	-0.348005	10.2782	-1.2431	0.232052	0.999313	-4.87183
Q9NUW8	TDP1	PMA:SMES	0.290464	11.2499	1.24267	0.232205	0.999313	-4.87226
Q9GZR7	DDX24	PMA:SMES	-0.305109	11.7143	-1.24113	0.232759	0.999313	-4.87381
P17706	PTPN2	PMA:SMES	0.118219	13.0294	1.24107	0.23278	0.999313	-4.87387
O95825	CRYZL1	PMA:SMES	0.104884	12.9386	1.24011	0.233124	0.999313	-4.87482
Q13610	PWP1	PMA:SMES	0.293372	9.87082	1.23776	0.233973	0.999313	-4.87718
Q8WUA2	PPIL4	PMA:SMES	0.18491	11.7987	1.23743	0.234093	0.999313	-4.87751
O75688	PPM1B	PMA:SMES	-0.0948485	15.2355	-1.23739	0.234105	0.999313	-4.87755
Q15102	PAFAH1B3	PMA:SMES	0.1183	14.7342	1.23711	0.234206	0.999313	-4.87783
Q8NHG7	SVIP	PMA:SMES	-0.305766	14.5206	-1.23628	0.234507	0.999313	-4.87866
Q86SZ2	TRAPPC6B	PMA:SMES	-0.14996	13.0547	-1.23537	0.234835	0.999313	-4.87956
Q9H936	SLC25A22	PMA:SMES	0.332452	10.6275	1.23525	0.234878	0.999313	-4.87968
Q9BT40	INPP5K	PMA:SMES	-0.285788	10.0142	-1.23496	0.234983	0.999313	-4.87997
Q9NUQ7	UFSP2	PMA:SMES	-0.212767	14.6851	-1.2338	0.235405	0.999313	-4.88113
P19338	NCL	PMA:SMES	-0.122421	15.4915	-1.23377	0.235415	0.999313	-4.88116
Q9Y276	BCS1L	PMA:SMES	-0.118962	15.8785	-1.23338	0.235556	0.999313	-4.88155
Q53EU6	GPAT3	PMA:SMES	-0.147547	13.4447	-1.23286	0.235747	0.999313	-4.88207
Q5MNZ9	WIPI1	PMA:SMES	0.151797	12.567	1.23282	0.235762	0.999313	-4.88211
Q9BVS4	RIOK2	PMA:SMES	-0.239856	11.5741	-1.23247	0.235889	0.999313	-4.88246
O75348	ATP6V1G1	PMA:SMES	0.0980922	16.6082	1.23123	0.236338	0.999313	-4.88369
O43670	ZNF207	PMA:SMES	-0.257882	10.912	-1.23069	0.236536	0.999313	-4.88423
Q8IWV7	UBR1	PMA:SMES	-0.0988299	15.3569	-1.23026	0.236693	0.999313	-4.88466
Q6PID8	KLHDC10	PMA:SMES	-0.377629	10.6258	-1.22957	0.236942	0.999313	-4.88534
Q5JTV8	TOR1AIP1	PMA:SMES	-0.123238	16.5075	-1.22815	0.23746	0.999313	-4.88675
Q9UJU6	DBNL	PMA:SMES	-0.119674	16.6184	-1.22762	0.237653	0.999313	-4.88728
Q9NWU5	MRPL22	PMA:SMES	-0.291867	10.5866	-1.22624	0.238158	0.999313	-4.88865
Q8IZP0	ABI1	PMA:SMES	-0.128345	14.0205	-1.22594	0.238267	0.999313	-4.88895
Q6ZRI6	C15orf39	PMA:SMES	-0.302575	11.3511	-1.22555	0.238411	0.999313	-4.88934
Q96JN0	LCOR	PMA:SMES	0.372619	12.4449	1.22551	0.238424	0.999313	-4.88937
P21580	TNFAIP3	PMA:SMES	-0.17939	12.1964	-1.225	0.238612	0.999313	-4.88988
Q9UPS6		PMA:SMES	0.308121	9.91292	1.22378	0.23906	0.999313	-4.89109
O15371	EIF3D	PMA:SMES	-0.210115	12.8306	-1.22299	0.239349	0.999313	-4.89187
Q12789	GTF3C1	PMA:SMES	0.0896809	16.9697	1.22274	0.239441	0.999313	-4.89212
Q6VY07	PACS1	PMA:SMES	-0.106502	13.8789	-1.22236	0.239583	0.999313	-4.8925
Q9Y6R4	MAP3K4	PMA:SMES	0.348328	11.3638	1.22119	0.240013	0.999313	-4.89366
Q12756	KIF1A	PMA:SMES	0.368782	11.5788	1.22061	0.240226	0.999313	-4.89423
Q14498	RBM39	PMA:SMES	-0.0937331	14.5234	-1.21963	0.240588	0.999313	-4.8952
Q14966	ZNF638	PMA:SMES	-0.141103	12.4413	-1.21937	0.240683	0.999313	-4.89545
P28066	PSMA5	PMA:SMES	-0.134153	14.3407	-1.21932	0.240702	0.999313	-4.8955
O43189	PHF1	PMA:SMES	0.298568	10.9351	1.21897	0.240828	0.999313	-4.89584
Q8N573	OXR1	PMA:SMES	-0.118584	12.7294	-1.21884	0.240878	0.999313	-4.89597
P61981	YWHAG	PMA:SMES	-0.187461	15.1963	-1.21849	0.241008	0.999313	-4.89632
P0DOX7		PMA:SMES	0.287751	13.2451	1.21779	0.241265	0.999313	-4.89701
Q96AG4	LRRC59	PMA:SMES	0.197877	14.8682	1.21581	0.241997	0.999313	-4.89896
P01116	KRAS	PMA:SMES	-0.20986	13.1208	-1.21422	0.242588	0.999313	-4.90053
Q9H0U6	MRPL18	PMA:SMES	0.259332	10.9319	1.21365	0.242799	0.999313	-4.90109
Q8IWZ3	ANKHD1	PMA:SMES	-0.125787	16.2736	-1.21324	0.242952	0.999313	-4.9015
Q7Z4V5	HDGFL2	PMA:SMES	0.39105	15.884	1.21176	0.243502	0.999313	-4.90295
Q9H6Q3	SLA2	PMA:SMES	0.275168	9.83681	1.21142	0.243631	0.999313	-4.90329
Q9NW82	WDR70	PMA:SMES	-0.131678	13.1412	-1.21117	0.243721	0.999313	-4.90353
Q6NUM6	TYW1B	PMA:SMES	0.295154	13.4873	1.2111	0.243748	0.999313	-4.9036
Q96CW1	AP2M1	PMA:SMES	0.0836628	15.0676	1.21084	0.243847	0.999313	-4.90386
P48382	RFX5	PMA:SMES	-0.459806	10.769	-1.21057	0.243947	0.999313	-4.90412
P49841	GSK3B	PMA:SMES	0.124829	12.7071	1.20898	0.244538	0.999313	-4.90568
Q8TEB1	DCAF11	PMA:SMES	0.14019	12.2444	1.20854	0.244704	0.999313	-4.90611
P78383	SLC35B1	PMA:SMES	0.220529	11.6206	1.2085	0.24472	0.999313	-4.90616
Q8N8A2	ANKRD44	PMA:SMES	-0.0892318	14.4418	-1.2081	0.244867	0.999313	-4.90654
Q96JZ2	HSH2D	PMA:SMES	-0.200378	12.8647	-1.20717	0.245216	0.999313	-4.90746
Q9UPY3	DICER1	PMA:SMES	0.19032	11.6101	1.20662	0.24542	0.999313	-4.90799
Q92928		PMA:SMES	-0.406483	11.4247	-1.20514	0.245978	0.999313	-4.90945
O75446	SAP30	PMA:SMES	0.31924	10.6855	1.20451	0.246215	0.999313	-4.91006
Q15393	SF3B3	PMA:SMES	0.0923774	14.6247	1.20437	0.246266	0.999313	-4.9102
A6NEC2		PMA:SMES	0.196867	15.5139	1.20267	0.246903	0.999313	-4.91186
Q9NWA0	MED9	PMA:SMES	-0.336259	9.98416	-1.20254	0.246953	0.999313	-4.91198
Q5T2E6	ARMH3	PMA:SMES	-0.30068	10.7328	-1.20253	0.246957	0.999313	-4.912
Q8IZ81	ELMOD2	PMA:SMES	-0.124999	13.4144	-1.20226	0.247058	0.999313	-4.91226
Q16626	MEA1	PMA:SMES	-0.419775	9.86078	-1.20181	0.247228	0.999313	-4.9127
Q53S08	RAB6D	PMA:SMES	0.138984	13.7112	1.20035	0.247779	0.999313	-4.91412
O60925	PFDN1	PMA:SMES	0.111584	14.0537	1.20011	0.247868	0.999313	-4.91435
Q9Y316	MEMO1	PMA:SMES	0.146589	13.7436	1.19929	0.248177	0.999313	-4.91515
P57088	TMEM33	PMA:SMES	-0.102206	14.9513	-1.19795	0.248684	0.999313	-4.91646
O60244	MED14	PMA:SMES	0.143237	11.6702	1.19782	0.248734	0.999313	-4.91659
Q96EC8	YIPF6	PMA:SMES	0.318929	11.8714	1.19776	0.248759	0.999313	-4.91665
Q86U42	PABPN1	PMA:SMES	-0.234701	12.1126	-1.19741	0.248892	0.999313	-4.91699
O75400	PRPF40A	PMA:SMES	0.215954	14.2127	1.1974	0.248892	0.999313	-4.91699
Q15018	ABRAXAS2	PMA:SMES	-0.133545	13.2208	-1.19714	0.248992	0.999313	-4.91725
P36959	GMPR	PMA:SMES	-0.25322	11.9981	-1.19713	0.248996	0.999313	-4.91726
Q15599	NHERF2	PMA:SMES	0.517967	9.72344	1.19708	0.249016	0.999313	-4.91731
P62979	RPS27A	PMA:SMES	0.254187	11.9299	1.19645	0.249254	0.999313	-4.91792
Q9H2G2	SLK	PMA:SMES	-0.122796	16.0034	-1.19427	0.250082	0.999313	-4.92005
Q9NXA8	SIRT5	PMA:SMES	0.157002	12.5927	1.19394	0.250206	0.999313	-4.92036
Q96FX7	TRMT61A	PMA:SMES	0.28134	11.8566	1.19357	0.250348	0.999313	-4.92073
O60711	LPXN	PMA:SMES	-0.254305	11.2107	-1.19351	0.25037	0.999313	-4.92078
Q86V88	MDP1	PMA:SMES	0.152017	14.3913	1.19334	0.250433	0.999313	-4.92094
Q9BRJ7	NUDT16L1	PMA:SMES	-0.11023	13.3736	-1.19287	0.250612	0.999313	-4.9214
Q9BXJ9	NAA15	PMA:SMES	0.103808	14.0429	1.19282	0.250634	0.999313	-4.92145
O60907	TBL1X	PMA:SMES	0.287735	10.1548	1.19259	0.250718	0.999313	-4.92167
Q9UKL6	PCTP	PMA:SMES	-0.113775	13.5227	-1.19181	0.251015	0.999313	-4.92243
Q7Z614	SNX20	PMA:SMES	-0.316639	11.6971	-1.19174	0.251045	0.999313	-4.9225
Q8NHG8	ZNRF2	PMA:SMES	-0.345778	11.6346	-1.19166	0.251075	0.999313	-4.92258
Q9Y2E4	DIP2C	PMA:SMES	-0.227605	13.002	-1.19139	0.251176	0.999313	-4.92284
Q8N4Q0	PTGR3	PMA:SMES	-0.16497	11.8857	-1.19082	0.251393	0.999313	-4.92339
Q02086	SP2	PMA:SMES	-0.285062	11.8472	-1.19069	0.251444	0.999313	-4.92352
Q13489	BIRC3	PMA:SMES	0.32026	13.1538	1.19062	0.251469	0.999313	-4.92358
P48449	LSS	PMA:SMES	-0.165341	12.5304	-1.19014	0.251653	0.999313	-4.92405
P07954	FH	PMA:SMES	0.129834	14.4541	1.18924	0.251996	0.999313	-4.92492
P48426	PIP4K2A	PMA:SMES	-0.156379	13.5508	-1.18838	0.252326	0.999313	-4.92575
Q96RU3	FNBP1	PMA:SMES	-0.0992015	13.9688	-1.18827	0.252369	0.999313	-4.92586
P08047	SP1	PMA:SMES	-0.4631	9.01768	-1.18607	0.25321	0.999313	-4.92798
Q9H201	EPN3	PMA:SMES	-0.405539	10.0815	-1.18427	0.253902	0.999313	-4.92972
Q96K21	ZFYVE19	PMA:SMES	-0.313722	12.2313	-1.18424	0.253914	0.999313	-4.92975
Q5SW96	LDLRAP1	PMA:SMES	0.233481	10.2412	1.18349	0.254203	0.999313	-4.93048
Q6IQ23	PLEKHA7	PMA:SMES	-0.198291	12.8408	-1.18301	0.254386	0.999313	-4.93094
Q96RU2	USP28	PMA:SMES	0.396023	12.6194	1.18264	0.25453	0.999313	-4.9313
Q9BV38	WDR18	PMA:SMES	0.126684	13.0047	1.18066	0.255291	0.999313	-4.9332
O60885	BRD4	PMA:SMES	-0.127324	13.4245	-1.18044	0.255379	0.999313	-4.93342
P18085	ARF4	PMA:SMES	-0.224125	15.0098	-1.18033	0.25542	0.999313	-4.93352
O00478	BTN3A3	PMA:SMES	0.259711	10.6021	1.17961	0.255698	0.999313	-4.93421
Q9BY32	ITPA	PMA:SMES	-0.161956	13.4752	-1.17854	0.25611	0.999313	-4.93524
Q7Z4F1	LRP10	PMA:SMES	-0.171566	12.277	-1.17835	0.256185	0.999313	-4.93542
Q96FV9	THOC1	PMA:SMES	-0.16616	11.9154	-1.1777	0.256437	0.999313	-4.93605
Q7Z589	EMSY	PMA:SMES	-0.404602	11.1797	-1.17756	0.256492	0.999313	-4.93619
Q9H061	TMEM126A	PMA:SMES	0.149879	12.6306	1.17721	0.256626	0.999313	-4.93652
Q9NPF5	DMAP1	PMA:SMES	-0.251244	12.6489	-1.17475	0.257581	0.999313	-4.93888
Q9HAS0	C17orf75	PMA:SMES	-0.291695	10.8842	-1.17453	0.257666	0.999313	-4.93909
Q8NC51	SERBP1	PMA:SMES	-0.200785	14.2033	-1.17404	0.257858	0.999313	-4.93956
P34913	EPHX2	PMA:SMES	-0.376853	11.8602	-1.17339	0.258111	0.999313	-4.94018
Q13555	CAMK2G	PMA:SMES	-0.0972186	14.1253	-1.1732	0.258184	0.999313	-4.94036
Q9NR12	PDLIM7	PMA:SMES	-0.135203	16.1351	-1.17248	0.258463	0.999313	-4.94105
Q9NYG2	ZDHHC3	PMA:SMES	0.239076	12.313	1.17188	0.258701	0.999313	-4.94163
P31749	AKT1	PMA:SMES	0.125242	13.8028	1.17149	0.258851	0.999313	-4.942
Q9UQ16	DNM3	PMA:SMES	-0.184046	12.6882	-1.1711	0.259003	0.999313	-4.94237
P49662	CASP4	PMA:SMES	-0.154528	13.5266	-1.17078	0.259128	0.999313	-4.94268
Q7Z7H5	TMED4	PMA:SMES	-0.157598	13.9553	-1.17003	0.259421	0.999313	-4.9434
Q96AE4	FUBP1	PMA:SMES	-0.088772	15.6388	-1.1693	0.259704	0.999313	-4.94409
Q92622	RUBCN	PMA:SMES	0.249757	9.63025	1.16797	0.260228	0.999313	-4.94537
P06280	GLA	PMA:SMES	-0.12821	14.017	-1.1675	0.260413	0.999313	-4.94582
Q8N6Q8	METTL25	PMA:SMES	-0.352619	10.9457	-1.16696	0.260622	0.999313	-4.94633
Q15223	NECTIN1	PMA:SMES	0.364083	10.47	1.16658	0.260771	0.999313	-4.94669
O60704	TPST2	PMA:SMES	0.207568	10.9394	1.1664	0.260842	0.999313	-4.94686
P61421	ATP6V0D1	PMA:SMES	-0.125816	14.9403	-1.16435	0.261646	0.999313	-4.94881
Q14696	MESD	PMA:SMES	0.195982	12.5627	1.16321	0.262096	0.999313	-4.9499
Q13243	SRSF5	PMA:SMES	0.306514	11.1491	1.16276	0.262275	0.999313	-4.95033
P62750	RPL23A	PMA:SMES	-0.113917	16.1526	-1.16115	0.262908	0.999313	-4.95185
P25490	YY1	PMA:SMES	-0.196365	12.4159	-1.16109	0.262931	0.999313	-4.95191
P00846	ATP6	PMA:SMES	0.166401	14.7173	1.16063	0.263115	0.999313	-4.95235
Q9H082	RAB33B	PMA:SMES	-0.0935161	15.3924	-1.16044	0.26319	0.999313	-4.95253
P35658	NUP214	PMA:SMES	-0.12558	13.2646	-1.15994	0.263384	0.999313	-4.953
Q9H270	VPS11	PMA:SMES	-0.0978739	13.654	-1.15979	0.263444	0.999313	-4.95314
Q9Y4H2	IRS2	PMA:SMES	-0.409706	11.2504	-1.15915	0.263698	0.999313	-4.95375
P10301	RRAS	PMA:SMES	0.293625	12.2735	1.15895	0.263777	0.999313	-4.95394
Q96P16	RPRD1A	PMA:SMES	0.377084	11.3215	1.15849	0.26396	0.999313	-4.95438
Q15814	TBCC	PMA:SMES	0.114284	14.0824	1.15823	0.264064	0.999313	-4.95463
Q96NC0	ZMAT2	PMA:SMES	-0.367321	11.2863	-1.15807	0.264125	0.999313	-4.95477
Q9H4A3	WNK1	PMA:SMES	-0.103246	13.7534	-1.15766	0.26429	0.999313	-4.95517
Q86VZ1	P2RY8	PMA:SMES	0.287195	13.4487	1.15761	0.264309	0.999313	-4.95521
Q8NEN9	PDZD8	PMA:SMES	0.151629	12.4391	1.1575	0.264354	0.999313	-4.95532
Q6PIU2	NCEH1	PMA:SMES	-0.139466	12.3231	-1.15717	0.264481	0.999313	-4.95562
Q9NQ90	ANO2	PMA:SMES	-0.19026	11.1201	-1.15622	0.264861	0.999313	-4.95653
O95183	VAMP5	PMA:SMES	-0.314124	11.6083	-1.15607	0.264918	0.999313	-4.95667
Q96DM3	RMC1	PMA:SMES	0.0958125	13.5025	1.15508	0.265313	0.999313	-4.95761
Q3KRA6	C2orf76	PMA:SMES	0.235943	11.3158	1.15488	0.265393	0.999313	-4.9578
Q9NNW7	TXNRD2	PMA:SMES	-0.19367	11.5865	-1.15462	0.265497	0.999313	-4.95804
Q99627	COPS8	PMA:SMES	-0.225584	13.7182	-1.1546	0.265505	0.999313	-4.95806
Q96QD9	FYTTD1	PMA:SMES	-0.194538	12.4186	-1.15443	0.265572	0.999313	-4.95822
Q68CP4	HGSNAT	PMA:SMES	0.208874	13.033	1.15419	0.265668	0.999313	-4.95845
P43897	TSFM	PMA:SMES	-0.118555	13.0289	-1.15391	0.265777	0.999313	-4.95871
P27105	STOM	PMA:SMES	-0.121232	18.8058	-1.15366	0.265876	0.999313	-4.95894
Q9NU19	TBC1D22B	PMA:SMES	-0.207163	12.4529	-1.15339	0.265984	0.999313	-4.9592
O94905	ERLIN2	PMA:SMES	0.123595	14.745	1.15335	0.266002	0.999313	-4.95924
P00403	COX2	PMA:SMES	-0.448519	16.9282	-1.15315	0.266081	0.999313	-4.95943
O75334	PPFIA2	PMA:SMES	0.223796	14.8564	1.15218	0.266465	0.999313	-4.96034
P27361	MAPK3	PMA:SMES	-0.0782173	17.0265	-1.15206	0.266513	0.999313	-4.96045
P37802	TAGLN2	PMA:SMES	-0.105609	19.134	-1.15146	0.266755	0.999313	-4.96102
L0R6Q1		PMA:SMES	0.185595	13.4562	1.14949	0.26754	0.999313	-4.96288
Q99747	NAPG	PMA:SMES	0.118117	13.3599	1.14902	0.267729	0.999313	-4.96332
Q9NX14	NDUFB11	PMA:SMES	-0.387196	11.0498	-1.148	0.268136	0.999313	-4.96428
Q6R327	RICTOR	PMA:SMES	0.170581	11.2415	1.14726	0.268436	0.999313	-4.96498
Q8TAQ5	ZNF420	PMA:SMES	0.159906	16.5782	1.14699	0.268542	0.999313	-4.96523
Q6YP21	KYAT3	PMA:SMES	0.149307	12.7732	1.14692	0.268571	0.999313	-4.9653
Q14137	BOP1	PMA:SMES	0.390635	13.3145	1.14638	0.268787	0.999313	-4.9658
O75151	PHF2	PMA:SMES	-0.271475	10.2545	-1.14635	0.268797	0.999313	-4.96583
Q9BSW2	CRACR2A	PMA:SMES	-0.240322	10.9289	-1.14597	0.26895	0.999313	-4.96619
Q5JPF3		PMA:SMES	0.384121	14.5466	1.14577	0.269033	0.999313	-4.96638
P53992	SEC24C	PMA:SMES	-0.0985757	14.6049	-1.1456	0.269101	0.999313	-4.96654
Q5VWQ0	RSBN1	PMA:SMES	0.196317	11.5372	1.14516	0.269278	0.999313	-4.96695
O75506	HSBP1	PMA:SMES	-0.23926	12.1852	-1.14514	0.269285	0.999313	-4.96697
P59768	GNG2	PMA:SMES	-0.169116	14.9373	-1.14498	0.26935	0.999313	-4.96712
Q9NZB2	FAM120A	PMA:SMES	-0.086649	14.4209	-1.14401	0.269741	0.999313	-4.96803
P09668	CTSH	PMA:SMES	0.149766	12.6535	1.14357	0.269919	0.999313	-4.96845
Q9NVK5	FGFR1OP2	PMA:SMES	-0.155532	12.4318	-1.14312	0.270098	0.999313	-4.96887
Q96PU8	QKI	PMA:SMES	-0.177286	12.1905	-1.14307	0.270116	0.999313	-4.96891
Q16666	IFI16	PMA:SMES	-0.0837985	14.7971	-1.14277	0.270239	0.999313	-4.96919
O43524	FOXO3	PMA:SMES	-0.302121	10.7411	-1.14262	0.2703	0.999313	-4.96934
Q9NZJ9	NUDT4	PMA:SMES	-0.200669	12.6277	-1.14086	0.27101	0.999313	-4.97098
P60660	MYL6	PMA:SMES	0.125048	19.1915	1.14081	0.271028	0.999313	-4.97102
Q99611	SEPHS2	PMA:SMES	-0.321622	11.8927	-1.14062	0.271108	0.999313	-4.97121
P54802	NAGLU	PMA:SMES	0.142252	11.6335	1.13999	0.27136	0.999313	-4.97179
P46087	NOP2	PMA:SMES	0.253736	11.8949	1.1399	0.271396	0.999313	-4.97188
Q9H0D6	XRN2	PMA:SMES	-0.101652	13.9169	-1.1389	0.271804	0.999313	-4.97282
P50226	SULT1A2	PMA:SMES	0.232022	14.6666	1.13828	0.272052	0.999313	-4.97339
Q53H82	LACTB2	PMA:SMES	0.140442	13.598	1.13772	0.272279	0.999313	-4.97392
P46777	RPL5	PMA:SMES	0.14702	14.2228	1.13757	0.272342	0.999313	-4.97406
Q96BR1	SGK3	PMA:SMES	0.275389	12.0271	1.13672	0.272684	0.999313	-4.97485
O00217	NDUFS8	PMA:SMES	-0.169313	12.6013	-1.13586	0.273033	0.999313	-4.97565
P49641	MAN2A2	PMA:SMES	0.159092	13.8557	1.13518	0.273309	0.999313	-4.97628
A6NHL2	TUBAL3	PMA:SMES	0.297248	13.2495	1.13507	0.273356	0.999313	-4.97639
Q96I24	FUBP3	PMA:SMES	-0.117468	12.9395	-1.13489	0.273427	0.999313	-4.97655
P23497	SP100	PMA:SMES	0.193336	15.9066	1.1345	0.273589	0.999313	-4.97692
Q02880	TOP2B	PMA:SMES	-0.0843966	14.519	-1.13288	0.274247	0.999313	-4.97843
O76074	PDE5A	PMA:SMES	-0.226917	11.5076	-1.13199	0.27461	0.999313	-4.97926
Q7L590	MCM10	PMA:SMES	0.189077	15.4862	1.13049	0.275223	0.999313	-4.98066
O95140	MFN2	PMA:SMES	0.171154	11.1298	1.13034	0.275282	0.999313	-4.98079
Q6ZRS2	SRCAP	PMA:SMES	0.14978	13.39	1.13028	0.275307	0.999313	-4.98084
Q9NYB0	TERF2IP	PMA:SMES	-0.152442	12.6942	-1.12972	0.275536	0.999313	-4.98137
P00367	GLUD1	PMA:SMES	-0.0921727	14.6375	-1.12869	0.275958	0.999313	-4.98232
O60218	AKR1B10	PMA:SMES	-0.195486	11.549	-1.12817	0.276171	0.999313	-4.9828
Q8IXK0	PHC2	PMA:SMES	-0.354295	10.779	-1.12673	0.276761	0.999313	-4.98414
P38571	LIPA	PMA:SMES	-0.129059	12.3423	-1.12656	0.276832	0.999313	-4.9843
Q9NUU6	OTULINL	PMA:SMES	0.169018	14.6461	1.12619	0.276982	0.999313	-4.98464
Q68CZ6	HAUS3	PMA:SMES	0.269262	10.203	1.12566	0.2772	0.999313	-4.98513
Q9Y608	LRRFIP2	PMA:SMES	-0.200241	13.263	-1.12507	0.277443	0.999313	-4.98568
P62877	RBX1	PMA:SMES	0.198869	13.5567	1.12501	0.277468	0.999313	-4.98573
Q9P1Y5	CAMSAP3	PMA:SMES	0.246396	15.8143	1.12334	0.278156	0.999313	-4.98728
O60437	PPL	PMA:SMES	0.100572	13.6661	1.12287	0.278349	0.999313	-4.98771
Q14766	LTBP1	PMA:SMES	-0.206511	10.8698	-1.1225	0.278502	0.999313	-4.98805
Q15185	PTGES3	PMA:SMES	-0.122858	14.8231	-1.12161	0.27887	0.999313	-4.98888
P07477	PRSS1	PMA:SMES	0.281473	17.3576	1.12144	0.278936	0.999313	-4.98903
Q9UNE7	STUB1	PMA:SMES	0.202776	11.3669	1.11991	0.27957	0.999313	-4.99044
Q13573	SNW1	PMA:SMES	-0.110625	13.2068	-1.1186	0.280113	0.999313	-4.99165
O94901	SUN1	PMA:SMES	-0.341992	11.503	-1.11798	0.28037	0.999313	-4.99222
Q9UGV2	NDRG3	PMA:SMES	-0.163066	11.9399	-1.11712	0.280725	0.999313	-4.99301
O75083	WDR1	PMA:SMES	-0.102636	19.2131	-1.11706	0.280748	0.999313	-4.99306
Q53GL0	PLEKHO1	PMA:SMES	0.193412	11.2882	1.11664	0.280924	0.999313	-4.99345
Q9BSH5	HDHD3	PMA:SMES	0.243745	11.8496	1.11642	0.281016	0.999313	-4.99366
Q96H22	CENPN	PMA:SMES	0.360027	9.37812	1.11618	0.281114	0.999313	-4.99387
Q9Y6A5	TACC3	PMA:SMES	-0.217769	12.1256	-1.11581	0.281268	0.999313	-4.99421
Q6UW02	CYP20A1	PMA:SMES	-0.157933	11.675	-1.11556	0.281373	0.999313	-4.99445
Q3YEC7	RABL6	PMA:SMES	-0.112615	14.3666	-1.11503	0.281594	0.999313	-4.99493
P52815	MRPL12	PMA:SMES	0.106763	13.1321	1.11449	0.281817	0.999313	-4.99543
P09601	HMOX1	PMA:SMES	0.154518	11.5019	1.11337	0.282283	0.999313	-4.99646
Q16594	TAF9	PMA:SMES	0.15711	13.5878	1.11217	0.282784	0.999313	-4.99756
Q9Y3C8	UFC1	PMA:SMES	0.124494	15.2745	1.1119	0.282895	0.999313	-4.9978
Q92851	CASP10	PMA:SMES	0.125044	14.3974	1.11146	0.28308	0.999313	-4.99821
Q96RL1	UIMC1	PMA:SMES	0.176282	10.6867	1.11144	0.28309	0.999313	-4.99823
Q7L576	CYFIP1	PMA:SMES	0.144715	14.3764	1.10961	0.283851	0.999313	-4.9999
P49757	NUMB	PMA:SMES	-0.101792	14.3876	-1.10906	0.284081	0.999313	-5.0004
Q9NQ89	C12orf4	PMA:SMES	-0.433121	10.5277	-1.10886	0.284164	0.999313	-5.00058
Q9UMZ2	SYNRG	PMA:SMES	-0.14163	12.0523	-1.10825	0.28442	0.999313	-5.00114
Q5T440	IBA57	PMA:SMES	-0.244783	11.3836	-1.10735	0.284798	0.999313	-5.00196
Q96JH7	VCPIP1	PMA:SMES	-0.124707	13.7309	-1.10716	0.284876	0.999313	-5.00213
O75935	DCTN3	PMA:SMES	0.156697	14.3078	1.10704	0.284927	0.999313	-5.00224
Q96QG7	MTMR9	PMA:SMES	0.126711	12.6629	1.10678	0.285038	0.999313	-5.00249
C9JLW8	MCRIP1	PMA:SMES	0.218232	11.3156	1.10645	0.285177	0.999313	-5.00279
O96006	ZBED1	PMA:SMES	0.141041	11.9521	1.10634	0.285222	0.999313	-5.00289
P13797	PLS3	PMA:SMES	-0.117202	19.4534	-1.10603	0.28535	0.999313	-5.00317
Q92552	MRPS27	PMA:SMES	0.13103	11.4642	1.10538	0.285624	0.999313	-5.00376
Q9ULR0	ISY1	PMA:SMES	-0.252376	10.3389	-1.10416	0.286137	0.999313	-5.00487
Q8WYP5	AHCTF1	PMA:SMES	-0.113567	13.1832	-1.10395	0.286226	0.999313	-5.00507
Q5MNZ6	WDR45B	PMA:SMES	-0.184185	11.8416	-1.10297	0.286637	0.999313	-5.00596
Q8NB49	ATP11C	PMA:SMES	0.19339	13.8368	1.10237	0.286893	0.999313	-5.00651
Q9Y3P9	RABGAP1	PMA:SMES	-0.144449	11.4715	-1.10209	0.287008	0.999313	-5.00676
Q9HB58	SP110	PMA:SMES	0.173047	13.3095	1.10167	0.287188	0.999313	-5.00714
Q9HA77	CARS2	PMA:SMES	-0.128661	12.1651	-1.10139	0.287305	0.999313	-5.0074
O00499	BIN1	PMA:SMES	0.173301	11.5078	1.10125	0.287365	0.999313	-5.00753
Q9UKA4	AKAP11	PMA:SMES	0.119364	14.1605	1.10116	0.287403	0.999313	-5.00761
Q9Y4P3	TBL2	PMA:SMES	0.178498	11.3644	1.0991	0.288271	0.999313	-5.00948
O95396	MOCS3	PMA:SMES	0.334226	9.30625	1.09894	0.288341	0.999313	-5.00962
Q14240	EIF4A2	PMA:SMES	-0.0786413	13.8527	-1.09872	0.288434	0.999313	-5.00982
O94874	UFL1	PMA:SMES	-0.103797	13.9177	-1.0987	0.288441	0.999313	-5.00984
O95299	NDUFA10	PMA:SMES	-0.109636	13.6376	-1.0987	0.288442	0.999313	-5.00984
Q969V6	MRTFA	PMA:SMES	0.239779	10.6394	1.09789	0.288785	0.999313	-5.01058
P35613	BSG	PMA:SMES	0.219301	14.8857	1.09728	0.289042	0.999313	-5.01113
Q9NY27	PPP4R2	PMA:SMES	-0.191684	11.9427	-1.09701	0.289157	0.999313	-5.01137
Q9UKZ1	CNOT11	PMA:SMES	-0.141225	11.7815	-1.09608	0.289549	0.999313	-5.01221
Q99623	PHB2	PMA:SMES	0.113835	16.0246	1.09532	0.289874	0.999313	-5.0129
Q99943	AGPAT1	PMA:SMES	-0.130321	13.1817	-1.09395	0.290454	0.999313	-5.01414
O15355	PPM1G	PMA:SMES	-0.209495	12.6232	-1.09316	0.290793	0.999313	-5.01486
Q8NCE2	MTMR14	PMA:SMES	0.134164	11.9878	1.09207	0.291254	0.999313	-5.01583
P41227	NAA10	PMA:SMES	-0.166318	13.596	-1.09197	0.291296	0.999313	-5.01592
Q8IWB7	WDFY1	PMA:SMES	-0.101515	13.953	-1.09096	0.291728	0.999313	-5.01684
Q5T1V6	DDX59	PMA:SMES	-0.274377	13.231	-1.09017	0.292068	0.999313	-5.01755
Q9UPN7	PPP6R1	PMA:SMES	-0.113558	14.8322	-1.08976	0.29224	0.999313	-5.01792
Q7L2J0	MEPCE	PMA:SMES	-0.290709	11.7108	-1.08897	0.29258	0.999313	-5.01863
Q9Y2D2	SLC35A3	PMA:SMES	0.393825	10.7968	1.08865	0.292716	0.999313	-5.01892
P16401	H1-5	PMA:SMES	0.310885	20.8679	1.08822	0.2929	0.999313	-5.01931
Q6IAN0	DHRS7B	PMA:SMES	0.153485	11.5116	1.0879	0.293035	0.999313	-5.01959
P13861	PRKAR2A	PMA:SMES	-0.10127	14.7513	-1.08776	0.293098	0.999313	-5.01972
Q9NWV8	BABAM1	PMA:SMES	-0.126184	12.4762	-1.08735	0.293273	0.999313	-5.02009
Q6P1X5	TAF2	PMA:SMES	-0.297036	10.9276	-1.08672	0.293541	0.999313	-5.02066
Q12792	TWF1	PMA:SMES	0.140663	14.3201	1.08637	0.293694	0.999313	-5.02097
P14314	PRKCSH	PMA:SMES	-0.12531	15.64	-1.08604	0.293835	0.999313	-5.02127
Q9H330	TMEM245	PMA:SMES	0.289384	11.5988	1.08593	0.293881	0.999313	-5.02137
P84077	ARF1	PMA:SMES	-0.278899	15.152	-1.08588	0.293902	0.999313	-5.02141
P23528	CFL1	PMA:SMES	-0.188159	18.7614	-1.08585	0.293913	0.999313	-5.02143
Q96HC4	PDLIM5	PMA:SMES	-0.116789	14.5569	-1.08581	0.293932	0.999313	-5.02147
Q9P246	STIM2	PMA:SMES	0.157548	11.7113	1.0858	0.293935	0.999313	-5.02148
Q15029	EFTUD2	PMA:SMES	-0.0780878	15.7404	-1.08534	0.294134	0.999313	-5.0219
Q9Y6B7	AP4B1	PMA:SMES	0.15558	11.2542	1.08531	0.294145	0.999313	-5.02192
P54098	POLG	PMA:SMES	-0.45243	9.21219	-1.08524	0.294178	0.999313	-5.02199
Q9Y6H1	CHCHD2	PMA:SMES	-0.122221	13.2006	-1.08489	0.294327	0.999313	-5.0223
Q96IG2	FBXL20	PMA:SMES	-0.147525	12.4931	-1.08441	0.294532	0.999313	-5.02273
Q92797	SYMPK	PMA:SMES	0.0950764	12.6893	1.08378	0.294802	0.999313	-5.02329
P50395	GDI2	PMA:SMES	-0.107637	18.1886	-1.08259	0.295317	0.999313	-5.02437
Q8N4P2	IFT70B	PMA:SMES	0.350339	10.6502	1.08234	0.295423	0.999313	-5.02459
P27701	CD82	PMA:SMES	0.483616	13.8994	1.08199	0.295572	0.999313	-5.0249
P30520	ADSS2	PMA:SMES	-0.147808	17.5515	-1.08178	0.295664	0.999313	-5.02509
Q6AI08	HEATR6	PMA:SMES	0.23271	14.7017	1.0814	0.29583	0.999313	-5.02543
Q92878	RAD50	PMA:SMES	0.155914	15.0955	1.08072	0.296121	0.999313	-5.02604
P04080	CSTB	PMA:SMES	0.10956	15.5314	1.08072	0.296122	0.999313	-5.02604
Q6UWE0	LRSAM1	PMA:SMES	-0.158011	11.7443	-1.0807	0.296129	0.999313	-5.02605
P13598	ICAM2	PMA:SMES	-0.324425	10.3836	-1.07978	0.296529	0.999313	-5.02688
Q6ULP2	AFTPH	PMA:SMES	-0.18079	11.0401	-1.07974	0.296545	0.999313	-5.02692
Q96N67	DOCK7	PMA:SMES	0.237647	13.5236	1.07963	0.29659	0.999313	-5.02701
Q13162	PRDX4	PMA:SMES	-0.113043	13.7245	-1.07939	0.296695	0.999313	-5.02722
O00139	KIF2A	PMA:SMES	-0.110583	13.5449	-1.07921	0.296772	0.999313	-5.02739
Q9Y2G2	CARD8	PMA:SMES	0.1064	12.6066	1.07917	0.29679	0.999313	-5.02742
Q9NZ43	USE1	PMA:SMES	-0.212971	11.5253	-1.07898	0.296873	0.999313	-5.02759
Q9H6U6	BCAS3	PMA:SMES	0.134746	11.9407	1.0787	0.296993	0.999313	-5.02784
Q13643	FHL3	PMA:SMES	0.175963	13.0104	1.07779	0.297387	0.999313	-5.02865
Q9ULX6	AKAP8L	PMA:SMES	-0.198094	11.3243	-1.07737	0.297568	0.999313	-5.02903
P29374	ARID4A	PMA:SMES	0.237613	11.7164	1.07618	0.298086	0.999313	-5.0301
O00746	NME4	PMA:SMES	0.411576	10.8042	1.07614	0.298103	0.999313	-5.03013
P23368	ME2	PMA:SMES	-0.0902111	15.2684	-1.07327	0.299347	0.999313	-5.03268
Q9BWM7	SFXN3	PMA:SMES	-0.152341	13.5192	-1.07277	0.299564	0.999313	-5.03312
Q92538	GBF1	PMA:SMES	0.106292	12.8779	1.07239	0.299729	0.999313	-5.03346
Q6IQ22	RAB12	PMA:SMES	0.26596	9.86165	1.07238	0.299737	0.999313	-5.03348
O15357	INPPL1	PMA:SMES	-0.0836755	13.3529	-1.07212	0.299849	0.999313	-5.03371
Q9H930	SP140L	PMA:SMES	-0.130211	14.1081	-1.07156	0.300093	0.999313	-5.03421
P50990	CCT8	PMA:SMES	-0.0773476	16.031	-1.07145	0.300142	0.999313	-5.03431
P05106	ITGB3	PMA:SMES	-0.209234	13.3817	-1.07047	0.300567	0.999313	-5.03517
O75152	ZC3H11A	PMA:SMES	-0.13732	12.5426	-1.07043	0.300587	0.999313	-5.03521
P07737	PFN1	PMA:SMES	-0.129175	20.8455	-1.0693	0.301079	0.999313	-5.03621
Q13867	BLMH	PMA:SMES	0.191571	14.4785	1.06864	0.301367	0.999313	-5.0368
Q92831	KAT2B	PMA:SMES	-0.309812	10.2828	-1.06698	0.30209	0.999313	-5.03826
P30566	ADSL	PMA:SMES	0.115784	13.8081	1.06678	0.302179	0.999313	-5.03844
Q9BY43	CHMP4A	PMA:SMES	-0.163083	12.1189	-1.06588	0.302573	0.999313	-5.03924
O60449	LY75	PMA:SMES	0.145337	12.509	1.06553	0.302728	0.999313	-5.03955
O95372	LYPLA2	PMA:SMES	-0.139768	13.1572	-1.06547	0.302755	0.999313	-5.0396
Q969F9	HPS3	PMA:SMES	0.132918	13.0511	1.0649	0.303002	0.999313	-5.0401
Q13362	PPP2R5C	PMA:SMES	-0.141156	12.931	-1.06441	0.303219	0.999313	-5.04054
P48553	TRAPPC10	PMA:SMES	-0.115198	12.0449	-1.06415	0.303332	0.999313	-5.04077
O00506	STK25	PMA:SMES	-0.157697	14.3837	-1.06255	0.304037	0.999313	-5.04218
P01893		PMA:SMES	-0.279939	12.5814	-1.06229	0.304151	0.999313	-5.04241
Q9H9A5	CNOT10	PMA:SMES	0.126942	11.6287	1.0622	0.30419	0.999313	-5.04249
Q86UT6	NLRX1	PMA:SMES	0.0938186	13.4848	1.06213	0.30422	0.999313	-5.04255
Q04727	TLE4	PMA:SMES	-0.155594	13.7208	-1.06103	0.304704	0.999313	-5.04352
P22392	NME2	PMA:SMES	0.12509	17.351	1.06083	0.304795	0.999313	-5.0437
Q03938	ZNF90	PMA:SMES	0.228344	16.3946	1.06069	0.304855	0.999313	-5.04382
Q92599	SEPTIN8	PMA:SMES	0.10059	16.1471	1.06054	0.304919	0.999313	-5.04395
O95251	KAT7	PMA:SMES	0.149634	10.7953	1.05925	0.305491	0.999313	-5.04509
Q13283	G3BP1	PMA:SMES	-0.124556	13.5428	-1.05909	0.305562	0.999313	-5.04523
Q9P0J1	PDP1	PMA:SMES	-0.130634	12.1248	-1.05895	0.30562	0.999313	-5.04535
Q92685	ALG3	PMA:SMES	0.237301	13.3221	1.05883	0.305675	0.999313	-5.04546
Q9UHD9	UBQLN2	PMA:SMES	-0.128253	13.919	-1.05808	0.306006	0.999313	-5.04611
Q12824	SMARCB1	PMA:SMES	-0.173031	12.5406	-1.05761	0.306215	0.999313	-5.04653
P53004	BLVRA	PMA:SMES	0.0922788	16.3906	1.05702	0.306474	0.999313	-5.04705
Q86WX3	RPS19BP1	PMA:SMES	-0.248071	12.4805	-1.05651	0.306703	0.999313	-5.0475
Q53T59	HS1BP3	PMA:SMES	0.0874956	15.3721	1.05626	0.306811	0.999313	-5.04771
Q9H2D6	TRIOBP	PMA:SMES	-0.125218	12.3852	-1.05594	0.306951	0.999313	-5.04799
Q9UHP3	USP25	PMA:SMES	-0.201262	12.1049	-1.05566	0.307076	0.999313	-5.04824
Q08211	DHX9	PMA:SMES	-0.089659	17.8367	-1.0556	0.307104	0.999313	-5.0483
O14548	COX7A2L	PMA:SMES	-0.283634	11.9655	-1.05546	0.307164	0.999313	-5.04841
P30040	ERP29	PMA:SMES	-0.098184	16.5955	-1.05394	0.30784	0.999313	-5.04975
Q13153	PAK1	PMA:SMES	-0.149525	13.9254	-1.05351	0.30803	0.999313	-5.05012
P62942	FKBP1A	PMA:SMES	-0.084143	15.963	-1.05289	0.308307	0.999313	-5.05067
P17010	ZFX	PMA:SMES	0.29639	10.8804	1.0521	0.308657	0.999313	-5.05136
Q8IZE3	SCYL3	PMA:SMES	0.31423	10.5708	1.05167	0.308846	0.999313	-5.05173
Q15836	VAMP3	PMA:SMES	-0.30912	11.852	-1.04945	0.309835	0.999313	-5.05367
Q9Y6K9	IKBKG	PMA:SMES	0.170597	13.6523	1.04942	0.309852	0.999313	-5.05371
Q13126	MTAP	PMA:SMES	-0.0793744	14.3251	-1.04926	0.30992	0.999313	-5.05384
Q9Y266	NUDC	PMA:SMES	0.157099	13.2562	1.04926	0.309923	0.999313	-5.05385
A0JNW5	BLTP3B	PMA:SMES	0.217305	10.4653	1.04913	0.309978	0.999313	-5.05395
P35612	ADD2	PMA:SMES	-0.239225	12.8712	-1.04913	0.309979	0.999313	-5.05395
Q9NZ01	TECR	PMA:SMES	-0.101989	14.1976	-1.04909	0.309995	0.999313	-5.05399
O43353	RIPK2	PMA:SMES	-0.22275	11.8968	-1.04907	0.310004	0.999313	-5.054
P41250	GARS1	PMA:SMES	-0.0883195	15.036	-1.04904	0.310022	0.999313	-5.05404
Q9HD15	SRA1	PMA:SMES	0.10156	13.9805	1.04868	0.31018	0.999313	-5.05435
Q13428	TCOF1	PMA:SMES	-0.190092	12.6828	-1.04711	0.310882	0.999313	-5.05572
O75179	ANKRD17	PMA:SMES	-0.191869	11.2041	-1.04701	0.310927	0.999313	-5.05581
O14773	TPP1	PMA:SMES	0.131397	16.5792	1.04676	0.311036	0.999313	-5.05602
Q7Z7E8	UBE2Q1	PMA:SMES	-0.133453	11.3122	-1.04542	0.311638	0.999313	-5.05719
P31946	YWHAB	PMA:SMES	-0.145885	17.1724	-1.04488	0.311879	0.999313	-5.05766
Q9NZJ7	MTCH1	PMA:SMES	-0.159988	11.1201	-1.04448	0.312057	0.999313	-5.058
Q9P016	THYN1	PMA:SMES	0.0838259	15.6929	1.04442	0.312086	0.999313	-5.05806
P68871	HBB	PMA:SMES	-0.391908	15.7877	-1.04363	0.312438	0.999313	-5.05874
Q53GS7	GLE1	PMA:SMES	0.0844345	12.9946	1.04319	0.312638	0.999313	-5.05913
O14957	UQCR11	PMA:SMES	-0.287529	12.1708	-1.04243	0.312979	0.999313	-5.05979
Q9UBN7	HDAC6	PMA:SMES	-0.318027	10.8207	-1.04221	0.313078	0.999313	-5.05998
Q9Y3B4	SF3B6	PMA:SMES	0.460324	11.5475	1.04129	0.313488	0.999313	-5.06077
P28838	LAP3	PMA:SMES	0.0696411	14.4475	1.04061	0.313798	0.999313	-5.06137
P56377	AP1S2	PMA:SMES	0.167118	15.4138	1.0406	0.313801	0.999313	-5.06137
P39687	ANP32A	PMA:SMES	-0.103956	17.1786	-1.04021	0.313975	0.999313	-5.06171
P34896	SHMT1	PMA:SMES	0.0920592	13.6614	1.0394	0.31434	0.999313	-5.06241
Q15070	OXA1L	PMA:SMES	-0.192116	12.4843	-1.03896	0.31454	0.999313	-5.06279
P51858	HDGF	PMA:SMES	-0.198903	14.7829	-1.03878	0.314623	0.999313	-5.06295
Q9H9Q2	COPS7B	PMA:SMES	0.115462	13.6386	1.03838	0.314802	0.999313	-5.0633
Q8TC07	TBC1D15	PMA:SMES	-0.101725	13.0591	-1.03785	0.31504	0.999313	-5.06375
O43765	SGTA	PMA:SMES	-0.0915997	14.0731	-1.0374	0.315242	0.999313	-5.06414
Q9NS15	LTBP3	PMA:SMES	0.372118	12.4146	1.03717	0.315345	0.999313	-5.06434
O43187	IRAK2	PMA:SMES	-0.330306	11.684	-1.03605	0.315854	0.999313	-5.06531
Q71DI3	H3C14	PMA:SMES	-0.136954	20.5875	-1.03589	0.315927	0.999313	-5.06545
P17676	CEBPB	PMA:SMES	-0.220488	12.2101	-1.03577	0.315977	0.999313	-5.06555
Q658Y4	FAM91A1	PMA:SMES	-0.128742	11.3725	-1.03531	0.31619	0.999313	-5.06595
P51148	RAB5C	PMA:SMES	-0.0975819	14.8324	-1.03438	0.316609	0.999313	-5.06675
P18077	RPL35A	PMA:SMES	0.413998	13.9395	1.03438	0.316609	0.999313	-5.06675
Q8N4N8	KIF2B	PMA:SMES	-0.153988	14.4029	-1.03327	0.31711	0.999313	-5.0677
Q8NFQ8	TOR1AIP2	PMA:SMES	-0.237966	11.7615	-1.03317	0.317157	0.999313	-5.06779
P13164	IFITM1	PMA:SMES	0.536489	14.4653	1.0331	0.317189	0.999313	-5.06785
Q96KA5	CLPTM1L	PMA:SMES	-0.148771	11.2413	-1.0329	0.31728	0.999313	-5.06803
Q92925	SMARCD2	PMA:SMES	-0.118578	12.7435	-1.03199	0.31769	0.999313	-5.0688
Q8N612	FHIP1B	PMA:SMES	0.156447	12.0585	1.03197	0.3177	0.999313	-5.06882
Q9HAB8	PPCS	PMA:SMES	0.0752448	15.304	1.03194	0.317714	0.999313	-5.06885
Q96FV2	SCRN2	PMA:SMES	0.138144	12.1628	1.03158	0.31788	0.999313	-5.06916
Q9H875	PRKRIP1	PMA:SMES	0.177327	10.7229	1.03124	0.318032	0.999313	-5.06945
O15541	RNF113A	PMA:SMES	-0.197407	10.7181	-1.0307	0.318278	0.999313	-5.06992
Q9Y587	AP4S1	PMA:SMES	-0.156193	12.5402	-1.02873	0.319175	0.999313	-5.07161
O00453	LST1	PMA:SMES	-0.159808	15.5794	-1.02825	0.319392	0.999313	-5.07202
P08574	CYC1	PMA:SMES	0.133711	14.036	1.02791	0.319547	0.999313	-5.07231
P26572	MGAT1	PMA:SMES	0.118844	13.5648	1.02698	0.319974	0.999313	-5.07311
O00429	DNM1L	PMA:SMES	-0.0871876	15.1577	-1.02671	0.320095	0.999313	-5.07334
Q9UKV3	ACIN1	PMA:SMES	-0.135059	14.1102	-1.02615	0.32035	0.999313	-5.07382
Q99571	P2RX4	PMA:SMES	0.169616	12.2349	1.02508	0.320838	0.999313	-5.07473
O95989	NUDT3	PMA:SMES	0.0926798	13.8138	1.02484	0.320949	0.999313	-5.07494
Q8TEA1	NSUN6	PMA:SMES	0.230147	10.7462	1.02482	0.320958	0.999313	-5.07496
Q9NZ09	UBAP1	PMA:SMES	-0.191598	12.7939	-1.02466	0.321031	0.999313	-5.07509
Q9BZL4	PPP1R12C	PMA:SMES	-0.168618	11.9582	-1.0241	0.321289	0.999313	-5.07558
O95232	LUC7L3	PMA:SMES	-0.266417	11.3289	-1.02403	0.321321	0.999313	-5.07564
Q8IXQ6	PARP9	PMA:SMES	-0.199176	11.4597	-1.02351	0.321559	0.999313	-5.07608
Q8N5H7	SH2D3C	PMA:SMES	-0.115695	12.1519	-1.02273	0.321916	0.999313	-5.07674
Q71F56	MED13L	PMA:SMES	0.317081	11.0435	1.0226	0.321974	0.999313	-5.07685
Q9NX47	MARCHF5	PMA:SMES	0.197638	10.9537	1.02194	0.322276	0.999313	-5.07742
O75438	NDUFB1	PMA:SMES	0.208485	10.06	1.02136	0.322545	0.999313	-5.07792
Q96SW2	CRBN	PMA:SMES	-0.16136	11.9911	-1.02116	0.322637	0.999313	-5.07809
Q9Y224	RTRAF	PMA:SMES	-0.173452	13.7375	-1.02073	0.322834	0.999313	-5.07845
Q96DP5	MTFMT	PMA:SMES	0.307901	10.5738	1.02071	0.322842	0.999313	-5.07847
P05166	PCCB	PMA:SMES	0.224934	12.5894	1.02034	0.323012	0.999313	-5.07878
P01857		PMA:SMES	0.192422	15.5396	1.01998	0.323178	0.999313	-5.07909
P42356	PI4KA	PMA:SMES	0.0925753	18.5511	1.01997	0.323182	0.999313	-5.0791
Q86V21	AACS	PMA:SMES	-0.138395	12.9851	-1.01996	0.323187	0.999313	-5.07911
Q13232	NME3	PMA:SMES	0.196984	12.1692	1.0192	0.323537	0.999313	-5.07976
Q12888	TP53BP1	PMA:SMES	-0.175602	11.28	-1.01887	0.323689	0.999313	-5.08004
P24752	ACAT1	PMA:SMES	-0.0854704	15.0218	-1.01833	0.323936	0.999313	-5.08049
O94888	UBXN7	PMA:SMES	-0.0951025	13.6659	-1.0172	0.324458	0.999313	-5.08146
Q5M7Z0	RNFT1	PMA:SMES	0.300188	10.7875	1.01684	0.324623	0.999313	-5.08176
P62851	RPS25	PMA:SMES	0.214469	15.9381	1.01633	0.32486	0.999313	-5.0822
A4D1S5	RAB19	PMA:SMES	0.209728	13.4079	1.01627	0.324888	0.999313	-5.08225
Q8IU81	IRF2BP1	PMA:SMES	0.330847	10.8324	1.01619	0.324921	0.999313	-5.08231
O95757	HSPA4L	PMA:SMES	0.089053	13.4962	1.01616	0.324937	0.999313	-5.08234
Q5HYK7	SH3D19	PMA:SMES	0.124374	15.7205	1.01576	0.325122	0.999313	-5.08268
Q9Y613	FHOD1	PMA:SMES	-0.123832	12.785	-1.01513	0.325412	0.999313	-5.08321
Q86W56	BPHL	PMA:SMES	0.155759	11.8191	1.01513	0.325412	0.999313	-5.08321
Q9HDC9	APMAP	PMA:SMES	-0.111124	17.6986	-1.01492	0.32551	0.999313	-5.08339
Q8N9N5	BANP	PMA:SMES	0.359877	11.091	1.01478	0.325575	0.999313	-5.08351
Q9HC21	SLC25A19	PMA:SMES	-0.217366	10.6434	-1.01477	0.32558	0.999313	-5.08352
P60520	GABARAPL2	PMA:SMES	0.12447	13.4003	1.01445	0.325725	0.999313	-5.08379
P13489	RNH1	PMA:SMES	-0.0947825	18.0387	-1.01434	0.325779	0.999313	-5.08389
Q9NP80	PNPLA8	PMA:SMES	0.201232	10.4917	1.01279	0.326495	0.999313	-5.0852
Q8N2F6	ARMC10	PMA:SMES	0.0896175	16.2059	1.01271	0.326533	0.999313	-5.08527
Q6Y288	B3GLCT	PMA:SMES	0.41625	10.0297	1.01267	0.326548	0.999313	-5.0853
O14776	TCERG1	PMA:SMES	-0.13482	14.6295	-1.01259	0.326589	0.999313	-5.08537
Q9NTJ3	SMC4	PMA:SMES	0.176076	12.2672	1.01252	0.326618	0.999313	-5.08542
Q5VZK9	CARMIL1	PMA:SMES	-0.349947	11.7216	-1.01248	0.326638	0.999313	-5.08546
P55735	SEC13	PMA:SMES	0.0983361	15.1274	1.01131	0.327182	0.999313	-5.08645
P04792	HSPB1	PMA:SMES	-0.141303	12.8702	-1.01117	0.327245	0.999313	-5.08657
Q9UL54	TAOK2	PMA:SMES	-0.187029	12.4946	-1.0094	0.328065	0.999313	-5.08806
Q9ULL0	KIAA1210	PMA:SMES	-0.258411	11.9972	-1.00938	0.328078	0.999313	-5.08809
Q2PZI1	DPY19L1	PMA:SMES	0.144773	12.5903	1.00912	0.328197	0.999313	-5.0883
Q9NZM1	MYOF	PMA:SMES	0.185622	12.1625	1.00896	0.328271	0.999313	-5.08844
O75676	RPS6KA4	PMA:SMES	0.236195	12.1951	1.00824	0.328607	0.999313	-5.08905
Q9Y3L3	SH3BP1	PMA:SMES	-0.147313	13.1679	-1.00744	0.328979	0.999313	-5.08972
Q92974	ARHGEF2	PMA:SMES	-0.0795664	14.9389	-1.00723	0.329077	0.999313	-5.0899
Q92508	PIEZO1	PMA:SMES	0.349225	10.6113	1.00709	0.32914	0.999313	-5.09001
Q9Y3A5	SBDS	PMA:SMES	0.119113	12.5161	1.00678	0.329287	0.999313	-5.09028
Q9UBS0	RPS6KB2	PMA:SMES	0.133568	11.768	1.00654	0.329397	0.999313	-5.09048
Q9BRJ6	C7orf50	PMA:SMES	0.299356	11.1248	1.00592	0.329688	0.999313	-5.091
O75914	PAK3	PMA:SMES	-0.127857	15.4506	-1.00564	0.329818	0.999313	-5.09124
P06748	NPM1	PMA:SMES	0.276251	14.5552	1.0053	0.329973	0.999313	-5.09152
P22670	RFX1	PMA:SMES	-0.156777	11.9937	-1.00496	0.330136	0.999313	-5.09181
P53804	TTC3	PMA:SMES	-0.203569	15.1108	-1.00391	0.330626	0.999313	-5.09269
Q96C01	FAM136A	PMA:SMES	0.356616	10.6989	1.00381	0.330671	0.999313	-5.09277
Q13077	TRAF1	PMA:SMES	0.223363	12.1829	1.00302	0.33104	0.999313	-5.09344
O00148	DDX39A	PMA:SMES	0.109789	14.053	1.00276	0.331163	0.999313	-5.09366
Q8IX12	CCAR1	PMA:SMES	-0.13545	12.5407	-1.00206	0.331489	0.999313	-5.09424
P68036	UBE2L3	PMA:SMES	0.188504	12.9982	1.00165	0.331681	0.999313	-5.09459
Q8NEY1	NAV1	PMA:SMES	0.206652	12.0899	1.00086	0.33205	0.999313	-5.09525
Q8IUZ5	PHYKPL	PMA:SMES	-0.114647	12.1361	-1.00086	0.332052	0.999313	-5.09525
P24158	PRTN3	PMA:SMES	0.0973318	21.7679	1.0007	0.332125	0.999313	-5.09538
Q86TN4	TRPT1	PMA:SMES	0.363035	9.30881	1.00058	0.332182	0.999313	-5.09548
O14607	UTY	PMA:SMES	-0.18346	11.084	-0.999617	0.332634	0.999313	-5.09629
Q8IWA5	SLC44A2	PMA:SMES	0.318867	15.6992	0.999062	0.332894	0.999313	-5.09676
O75947	ATP5PD	PMA:SMES	-0.120366	14.4978	-0.998724	0.333053	0.999313	-5.09704
Q2TAA2	IAH1	PMA:SMES	-0.252729	12.5404	-0.998425	0.333193	0.999313	-5.09729
O00443	PIK3C2A	PMA:SMES	-0.241383	13.3403	-0.997805	0.333485	0.999313	-5.09781
Q96RE7	NACC1	PMA:SMES	-0.18085	13.3439	-0.997716	0.333526	0.999313	-5.09788
Q9BZD4	NUF2	PMA:SMES	0.268271	14.2454	0.997471	0.333642	0.999313	-5.09809
Q8N0Z6	TTC5	PMA:SMES	0.256356	10.5016	0.997373	0.333688	0.999313	-5.09817
Q9BSD7	NTPCR	PMA:SMES	0.181998	12.3833	0.996756	0.333978	0.999313	-5.09868
Q8N3D4	EHBP1L1	PMA:SMES	-0.125473	12.6184	-0.994866	0.334868	0.999313	-5.10026
O95347	SMC2	PMA:SMES	0.110614	13.6697	0.994252	0.335158	0.999313	-5.10077
Q14166	TTLL12	PMA:SMES	0.120385	15.2576	0.993488	0.335518	0.999313	-5.10141
O94766	B3GAT3	PMA:SMES	0.14995	11.1951	0.993459	0.335532	0.999313	-5.10143
Q5SW79	CEP170	PMA:SMES	-0.129222	13.0836	-0.993136	0.335684	0.999313	-5.1017
Q8N9Z2	CCDC71L	PMA:SMES	-0.258802	11.833	-0.992922	0.335785	0.999313	-5.10188
Q8WUI4	HDAC7	PMA:SMES	-0.164822	10.428	-0.992824	0.335832	0.999313	-5.10196
P60604	UBE2G2	PMA:SMES	-0.295195	12.3752	-0.992522	0.335974	0.999313	-5.10221
Q9UPN6	SCAF8	PMA:SMES	0.162889	12.8445	0.992139	0.336155	0.999313	-5.10253
Q9H5X1	CIAO2A	PMA:SMES	-0.124891	12.8499	-0.991622	0.3364	0.999313	-5.10296
Q96S52	PIGS	PMA:SMES	-0.130947	12.0709	-0.991038	0.336676	0.999313	-5.10345
P25105	PTAFR	PMA:SMES	-0.321027	9.88551	-0.991035	0.336677	0.999313	-5.10345
Q9Y6D9	MAD1L1	PMA:SMES	-0.121521	12.7441	-0.991003	0.336692	0.999313	-5.10348
O00189	AP4M1	PMA:SMES	0.201341	11.8872	0.990822	0.336778	0.999313	-5.10363
P23258	TUBG1	PMA:SMES	-0.129252	13.1413	-0.990391	0.336982	0.999313	-5.10399
Q03111	MLLT1	PMA:SMES	0.174664	11.9196	0.99019	0.337077	0.999313	-5.10415
O15258	RER1	PMA:SMES	0.190435	13.0649	0.989994	0.33717	0.999313	-5.10432
O00330	PDHX	PMA:SMES	-0.170728	12.0459	-0.989334	0.337483	0.999313	-5.10486
P50452	SERPINB8	PMA:SMES	-0.0812742	18.0569	-0.989234	0.33753	0.999313	-5.10495
Q9Y4E6	WDR7	PMA:SMES	-0.122082	12.2315	-0.989173	0.337559	0.999313	-5.105
Q13247	SRSF6	PMA:SMES	-0.13097	17.0643	-0.988942	0.337668	0.999313	-5.10519
Q8N8R5	C2orf69	PMA:SMES	-0.201278	11.7265	-0.988371	0.337939	0.999313	-5.10566
Q13642	FHL1	PMA:SMES	-0.135442	12.9384	-0.988041	0.338096	0.999313	-5.10594
Q9Y4F9	RIPOR2	PMA:SMES	-0.150139	13.1648	-0.98706	0.338562	0.999313	-5.10675
Q8IXB1	DNAJC10	PMA:SMES	0.243454	15.5063	0.986903	0.338636	0.999313	-5.10688
Q14254	FLOT2	PMA:SMES	0.075623	16.4495	0.986715	0.338726	0.999313	-5.10703
Q96C23	GALM	PMA:SMES	-0.0940795	14.3241	-0.986702	0.338732	0.999313	-5.10704
Q92572	AP3S1	PMA:SMES	-0.110035	13.8453	-0.985365	0.339367	0.999313	-5.10815
P11532	DMD	PMA:SMES	-0.291917	11.7801	-0.985132	0.339479	0.999313	-5.10834
Q96J42	TXNDC15	PMA:SMES	-0.493628	9.55184	-0.985018	0.339532	0.999313	-5.10844
Q8TF09	DYNLRB2	PMA:SMES	-0.187017	12.7191	-0.984987	0.339547	0.999313	-5.10846
Q7Z4H7	HAUS6	PMA:SMES	0.168231	13.5444	0.984656	0.339705	0.999313	-5.10874
Q86VX2	COMMD7	PMA:SMES	0.112497	14.5806	0.984506	0.339776	0.999313	-5.10886
P05556	ITGB1	PMA:SMES	0.119784	13.5448	0.984099	0.339971	0.999313	-5.1092
O95394	PGM3	PMA:SMES	0.136176	13.1561	0.984065	0.339987	0.999313	-5.10923
O43808	SLC25A17	PMA:SMES	0.293991	11.0743	0.983495	0.340258	0.999313	-5.1097
Q9Y383	LUC7L2	PMA:SMES	-0.0819354	14.6166	-0.982697	0.340639	0.999313	-5.11035
P62258	YWHAE	PMA:SMES	-0.0811496	16.0793	-0.982011	0.340966	0.999313	-5.11092
Q16775	HAGH	PMA:SMES	0.11935	14.247	0.981905	0.341017	0.999313	-5.11101
Q9H496	TOR1AIP2	PMA:SMES	-0.276083	9.92594	-0.981866	0.341036	0.999313	-5.11104
Q9NX00	TMEM160	PMA:SMES	-0.219685	12.8348	-0.981777	0.341078	0.999313	-5.11111
Q9Y4H4	GPSM3	PMA:SMES	-0.158897	15.8319	-0.980852	0.34152	0.999313	-5.11188
Q9NW68	BSDC1	PMA:SMES	-0.161175	11.6063	-0.980034	0.341911	0.999313	-5.11255
P0CG48	UBC	PMA:SMES	-0.0791778	19.5804	-0.979513	0.34216	0.999313	-5.11298
Q86UE8	TLK2	PMA:SMES	0.225323	11.1753	0.978823	0.34249	0.999313	-5.11355
Q8N108	MIER1	PMA:SMES	-0.381993	12.697	-0.978676	0.342561	0.999313	-5.11367
Q9P2A4	ABI3	PMA:SMES	-0.211768	10.449	-0.978668	0.342565	0.999313	-5.11367
P43034	PAFAH1B1	PMA:SMES	-0.0892657	15.0868	-0.977581	0.343085	0.999313	-5.11457
Q6P9B6	MEAK7	PMA:SMES	-0.253805	10.9496	-0.97753	0.34311	0.999313	-5.11461
Q92574	TSC1	PMA:SMES	0.106883	11.9096	0.977219	0.343259	0.999313	-5.11486
Q96CM8	ACSF2	PMA:SMES	-0.243087	11.4722	-0.976732	0.343493	0.999313	-5.11526
Q9NTN3	SLC35D1	PMA:SMES	0.135392	11.8138	0.976359	0.343672	0.999313	-5.11557
Q16739	UGCG	PMA:SMES	-0.200414	11.4223	-0.976146	0.343774	0.999313	-5.11574
Q9UJS0	SLC25A13	PMA:SMES	-0.0913723	12.5875	-0.975752	0.343963	0.999313	-5.11607
Q9H1K4	SLC25A18	PMA:SMES	-0.177689	12.7708	-0.975255	0.344202	0.999313	-5.11648
Q96ST2	IWS1	PMA:SMES	-0.103763	13.55	-0.974019	0.344796	0.999313	-5.11749
Q8TB96	ITFG1	PMA:SMES	-0.215042	10.69	-0.973444	0.345073	0.999313	-5.11796
Q969S3	ZNF622	PMA:SMES	-0.265238	10.0014	-0.973259	0.345162	0.999313	-5.11811
Q6F5E8	CARMIL2	PMA:SMES	-0.320299	14.3375	-0.973097	0.34524	0.999313	-5.11824
O00487	PSMD14	PMA:SMES	-0.107464	13.8955	-0.972423	0.345565	0.999313	-5.11879
Q7L2H7	EIF3M	PMA:SMES	0.153273	13.4552	0.971884	0.345825	0.999313	-5.11923
P09132	SRP19	PMA:SMES	-0.152309	13.3876	-0.969304	0.34707	0.999313	-5.12134
Q9Y2X7	GIT1	PMA:SMES	0.111502	13.1255	0.965662	0.348834	0.999313	-5.1243
Q99683	MAP3K5	PMA:SMES	-0.126307	11.5974	-0.96476	0.349271	0.999313	-5.12504
P22090	RPS4Y1	PMA:SMES	0.16513	13.5109	0.96458	0.349359	0.999313	-5.12518
Q6PGP7	SKIC3	PMA:SMES	0.103102	13.4414	0.964009	0.349637	0.999313	-5.12565
Q9NWH9	SLTM	PMA:SMES	-0.139646	12.0893	-0.963928	0.349676	0.999313	-5.12571
O75352	MPDU1	PMA:SMES	-0.15215	15.4719	-0.963821	0.349728	0.999313	-5.1258
P46934	NEDD4	PMA:SMES	0.122912	12.2624	0.963737	0.349769	0.999313	-5.12587
Q13425	SNTB2	PMA:SMES	0.0873789	13.6341	0.962546	0.350348	0.999313	-5.12683
Q96LJ7	DHRS1	PMA:SMES	0.147928	12.3464	0.961796	0.350713	0.999313	-5.12744
O75533	SF3B1	PMA:SMES	-0.0878758	15.2463	-0.961386	0.350913	0.999313	-5.12777
Q15785	TOMM34	PMA:SMES	0.154503	11.4575	0.961263	0.350972	0.999313	-5.12787
Q9Y4W2	LAS1L	PMA:SMES	0.235801	11.3507	0.961178	0.351014	0.999313	-5.12794
Q92794	KAT6A	PMA:SMES	0.249275	10.175	0.961082	0.351061	0.999313	-5.12802
Q96EP0	RNF31	PMA:SMES	0.0864294	12.4895	0.95882	0.352164	0.999313	-5.12985
P40938	RFC3	PMA:SMES	-0.173766	11.9234	-0.957148	0.352981	0.999313	-5.1312
Q96SZ5	ADO	PMA:SMES	0.156299	12.2827	0.957069	0.353019	0.999313	-5.13126
P59190	RAB15	PMA:SMES	-0.299717	16.2023	-0.956952	0.353077	0.999313	-5.13136
Q8N1F7	NUP93	PMA:SMES	-0.0800414	14.4477	-0.955736	0.353672	0.999313	-5.13234
Q8IYB7	DIS3L2	PMA:SMES	-0.142954	11.3966	-0.955183	0.353943	0.999313	-5.13278
O95747	OXSR1	PMA:SMES	-0.076888	16.494	-0.95514	0.353964	0.999313	-5.13281
Q96CQ1	SLC25A36	PMA:SMES	0.191052	13.8604	0.955061	0.354003	0.999313	-5.13288
Q9NVJ2	ARL8B	PMA:SMES	0.120539	17.6548	0.95504	0.354013	0.999313	-5.1329
Q9NR09	BIRC6	PMA:SMES	-0.0936889	11.7873	-0.954272	0.354389	0.999313	-5.13351
Q86VQ1	GLCCI1	PMA:SMES	-0.487842	10.3574	-0.954134	0.354457	0.999313	-5.13362
P42345	MTOR	PMA:SMES	0.091602	12.3465	0.953462	0.354787	0.999313	-5.13416
Q13505	MTX1	PMA:SMES	-0.164464	10.9658	-0.953416	0.354809	0.999313	-5.1342
Q32P28	P3H1	PMA:SMES	0.295292	9.49474	0.951983	0.355513	0.999313	-5.13535
Q8N163	CCAR2	PMA:SMES	0.0687171	14.4216	0.951619	0.355692	0.999313	-5.13564
Q53GS9	USP39	PMA:SMES	0.159963	13.5114	0.951603	0.3557	0.999313	-5.13566
P98179	RBM3	PMA:SMES	-0.181909	12.9107	-0.951368	0.355816	0.999313	-5.13585
P29692	EEF1D	PMA:SMES	-0.0780217	16.6044	-0.95059	0.356198	0.999313	-5.13647
O15085	ARHGEF11	PMA:SMES	-0.124629	11.6262	-0.950503	0.356241	0.999313	-5.13654
P38570	ITGAE	PMA:SMES	0.3085	13.894	0.950245	0.356368	0.999313	-5.13675
P42766	RPL35	PMA:SMES	0.444401	15.6878	0.949824	0.356576	0.999313	-5.13708
Q9BQ61	TRIR	PMA:SMES	-0.263252	13.513	-0.949565	0.356703	0.999313	-5.13729
P10909	CLU	PMA:SMES	-0.189444	12.5935	-0.949502	0.356734	0.999313	-5.13734
O43303	CCP110	PMA:SMES	-0.153941	13.5097	-0.949199	0.356883	0.999313	-5.13758
Q53GT1	KLHL22	PMA:SMES	-0.246208	10.9009	-0.948639	0.35716	0.999313	-5.13803
Q8N3U4	STAG2	PMA:SMES	-0.0982045	13.626	-0.948363	0.357295	0.999313	-5.13825
Q15424	SAFB	PMA:SMES	-0.130698	13.9198	-0.94829	0.357331	0.999313	-5.13831
Q16831	UPP1	PMA:SMES	-0.107432	13.0088	-0.947974	0.357487	0.999313	-5.13856
P46063	RECQL	PMA:SMES	0.0776856	14.6897	0.947449	0.357747	0.999313	-5.13898
Q96C11	FGGY	PMA:SMES	-0.138592	11.686	-0.947242	0.357849	0.999313	-5.13915
Q00610	CLTC	PMA:SMES	-0.0750735	17.3801	-0.946826	0.358054	0.999313	-5.13948
Q96AQ6	PBXIP1	PMA:SMES	0.146644	13.2373	0.946769	0.358082	0.999313	-5.13953
P42574	CASP3	PMA:SMES	-0.143752	15.2207	-0.946337	0.358296	0.999313	-5.13987
P51571	SSR4	PMA:SMES	-0.13077	13.6771	-0.946295	0.358317	0.999313	-5.13991
Q567U6	CCDC93	PMA:SMES	0.131004	13.9376	0.946206	0.358361	0.999313	-5.13998
Q9Y5M8	SRPRB	PMA:SMES	0.0802282	13.7071	0.945374	0.358772	0.999313	-5.14064
Q6ZT21	TMPPE	PMA:SMES	0.177892	12.1626	0.94499	0.358962	0.999313	-5.14095
P61604	HSPE1	PMA:SMES	0.060538	17.4215	0.944023	0.359441	0.999313	-5.14172
Q8WU76	SCFD2	PMA:SMES	0.132419	11.3964	0.943918	0.359493	0.999313	-5.1418
Q9Y6C9	MTCH2	PMA:SMES	0.12007	13.7347	0.94362	0.35964	0.999313	-5.14204
O95777	LSM8	PMA:SMES	0.317158	11.524	0.942975	0.35996	0.999313	-5.14255
Q96GE9	DMAC1	PMA:SMES	-0.375031	9.31475	-0.942828	0.360033	0.999313	-5.14267
Q8TEP8	CEP192	PMA:SMES	0.148323	18.6931	0.942	0.360444	0.999313	-5.14333
P16070	CD44	PMA:SMES	0.254056	15.8704	0.941937	0.360475	0.999313	-5.14338
Q6NXT6	TAPT1	PMA:SMES	0.106821	12.8993	0.940439	0.361219	0.999313	-5.14457
P28288	ABCD3	PMA:SMES	-0.105024	12.767	-0.940351	0.361262	0.999313	-5.14464
Q9ULD4	BRPF3	PMA:SMES	-0.234761	10.3373	-0.940254	0.361311	0.999313	-5.14472
O60825	PFKFB2	PMA:SMES	-0.110081	14.2408	-0.939943	0.361465	0.999313	-5.14496
Q08722	CD47	PMA:SMES	0.230443	16.3635	0.939888	0.361493	0.999313	-5.14501
Q96DG6	CMBL	PMA:SMES	0.227952	11.1811	0.939719	0.361576	0.999313	-5.14514
P48539	PCP4	PMA:SMES	-0.186048	14.119	-0.939379	0.361746	0.999313	-5.14541
P10599	TXN	PMA:SMES	-0.123342	19.0855	-0.93913	0.36187	0.999313	-5.14561
O43292	GPAA1	PMA:SMES	-0.133005	13.4056	-0.939075	0.361897	0.999313	-5.14565
Q5TEU4	NDUFAF5	PMA:SMES	0.261996	11.822	0.938795	0.362036	0.999313	-5.14587
Q9BVC4	MLST8	PMA:SMES	-0.311632	10.1561	-0.938318	0.362274	0.999313	-5.14625
Q8N9V3	WDSUB1	PMA:SMES	0.20685	11.0838	0.937783	0.36254	0.999313	-5.14668
Q9UK76	JPT1	PMA:SMES	-0.158724	13.0101	-0.937614	0.362624	0.999313	-5.14681
O00519	FAAH	PMA:SMES	-0.313981	10.9483	-0.93745	0.362706	0.999313	-5.14694
Q9Y2U5	MAP3K2	PMA:SMES	0.0945878	13.4126	0.936711	0.363075	0.999313	-5.14752
Q08378	GOLGA3	PMA:SMES	0.10495	12.0422	0.936043	0.363408	0.999313	-5.14805
Q9UMX0	UBQLN1	PMA:SMES	-0.115277	15.7165	-0.935564	0.363647	0.999313	-5.14843
Q04760	GLO1	PMA:SMES	0.135525	15.4526	0.935455	0.363701	0.999313	-5.14852
Q6AWC2	WWC2	PMA:SMES	-0.63879	13.3718	-0.935366	0.363746	0.999313	-5.14859
Q9NXN4	GDAP2	PMA:SMES	0.0968016	13.7893	0.934523	0.364167	0.999313	-5.14925
Q9NR77	PXMP2	PMA:SMES	-0.383775	8.97357	-0.933445	0.364706	0.999313	-5.1501
Q14694	USP10	PMA:SMES	0.0876151	12.1451	0.933311	0.364773	0.999313	-5.15021
Q9BRZ2	TRIM56	PMA:SMES	-0.0965261	12.6925	-0.933174	0.364842	0.999313	-5.15032
Q8IWU2	LMTK2	PMA:SMES	-0.11476	13.0875	-0.93297	0.364944	0.999313	-5.15048
Q9NYR9	NKIRAS2	PMA:SMES	-0.145048	12.074	-0.932768	0.365044	0.999313	-5.15064
Q9GZT8	NIF3L1	PMA:SMES	0.12636	13.5756	0.932085	0.365387	0.999313	-5.15118
P84103	SRSF3	PMA:SMES	0.126445	17.3374	0.931331	0.365764	0.999313	-5.15177
P55212	CASP6	PMA:SMES	0.0898653	13.1922	0.930488	0.366187	0.999313	-5.15243
Q9Y2I1	NISCH	PMA:SMES	0.128127	12.6829	0.930463	0.366199	0.999313	-5.15245
Q8N884	CGAS	PMA:SMES	0.166413	12.2409	0.930103	0.36638	0.999313	-5.15274
Q8IYU8	MICU2	PMA:SMES	-0.124388	12.7559	-0.930034	0.366415	0.999313	-5.15279
Q8NEZ2	VPS37A	PMA:SMES	0.117243	12.277	0.927108	0.367886	0.999313	-5.15509
Q9UM00	TMCO1	PMA:SMES	-0.19033	13.9057	-0.926308	0.368288	0.999313	-5.15572
Q96SU4	OSBPL9	PMA:SMES	0.113904	13.0889	0.925873	0.368507	0.999313	-5.15606
O95260	ATE1	PMA:SMES	-0.134863	11.858	-0.925697	0.368596	0.999313	-5.1562
P62829	RPL23	PMA:SMES	0.137383	14.5907	0.925518	0.368686	0.999313	-5.15634
P46976	GYG1	PMA:SMES	0.0913477	18.3831	0.925281	0.368806	0.999313	-5.15652
P04150	NR3C1	PMA:SMES	-0.118938	12.1507	-0.925104	0.368895	0.999313	-5.15666
Q7Z3J2	VPS35L	PMA:SMES	-0.0849278	14.2686	-0.924655	0.369121	0.999313	-5.15701
P02753	RBP4	PMA:SMES	0.228542	14.0954	0.924077	0.369413	0.999313	-5.15746
Q9P2Y5	UVRAG	PMA:SMES	-0.168828	11.7614	-0.923498	0.369705	0.999313	-5.15792
Q9Y6I3	EPN1	PMA:SMES	-0.123441	12.3639	-0.923332	0.369789	0.999313	-5.15804
O43572	AKAP10	PMA:SMES	-0.110247	12.682	-0.923093	0.36991	0.999313	-5.15823
Q9H1E5	TMX4	PMA:SMES	0.117133	14.0742	0.923004	0.369955	0.999313	-5.1583
Q8WYA6	CTNNBL1	PMA:SMES	0.108085	13.5596	0.922652	0.370132	0.999313	-5.15858
Q9NY33	DPP3	PMA:SMES	-0.112139	15.3686	-0.92242	0.370249	0.999313	-5.15876
Q96FS4	SIPA1	PMA:SMES	-0.0789624	16.0236	-0.922385	0.370267	0.999313	-5.15878
Q9BYX4	IFIH1	PMA:SMES	0.211622	10.3064	0.922318	0.370301	0.999313	-5.15884
Q9C0H2	TTYH3	PMA:SMES	0.24587	11.2008	0.922153	0.370384	0.999313	-5.15897
P84095	RHOG	PMA:SMES	-0.131153	17.1843	-0.922098	0.370412	0.999313	-5.15901
P36543	ATP6V1E1	PMA:SMES	-0.141317	14.7019	-0.922071	0.370426	0.999313	-5.15903
P36405	ARL3	PMA:SMES	-0.0754244	14.4357	-0.921911	0.370507	0.999313	-5.15915
Q96A26	FAM162A	PMA:SMES	0.247677	12.2167	0.921785	0.370571	0.999313	-5.15925
Q9UBF6	RNF7	PMA:SMES	-0.32884	12.0915	-0.921587	0.370671	0.999313	-5.15941
O60831	PRAF2	PMA:SMES	0.109087	13.3135	0.921111	0.370911	0.999313	-5.15978
P22352	GPX3	PMA:SMES	0.121459	11.3428	0.920758	0.37109	0.999313	-5.16005
Q9Y5P6	GMPPB	PMA:SMES	-0.0796369	15.1046	-0.920443	0.37125	0.999313	-5.1603
P58335	ANTXR2	PMA:SMES	0.0802279	13.6107	0.920298	0.371323	0.999313	-5.16041
P16885	PLCG2	PMA:SMES	-0.0755795	16.3899	-0.919109	0.371926	0.999313	-5.16134
Q4FZB7	KMT5B	PMA:SMES	0.291868	13.5165	0.917154	0.372918	0.999313	-5.16286
A3KMH1	VWA8	PMA:SMES	-0.115415	10.9402	-0.916626	0.373186	0.999313	-5.16327
Q96SK2	TMEM209	PMA:SMES	0.302807	11.716	0.916536	0.373231	0.999313	-5.16334
Q14644	RASA3	PMA:SMES	-0.14758	12.4002	-0.916511	0.373245	0.999313	-5.16336
P68133	ACTA1	PMA:SMES	-0.247749	13.648	-0.916249	0.373377	0.999313	-5.16356
Q9NQ11	ATP13A2	PMA:SMES	0.180067	11.2686	0.915755	0.373629	0.999313	-5.16394
P20073	ANXA7	PMA:SMES	-0.0672508	16.5456	-0.915387	0.373816	0.999313	-5.16423
P49815	TSC2	PMA:SMES	-0.106593	11.3551	-0.914907	0.37406	0.999313	-5.1646
Q9Y678	COPG1	PMA:SMES	0.089174	15.3031	0.91251	0.375281	0.999313	-5.16646
Q96GQ5	RUSF1	PMA:SMES	0.0888868	13.1782	0.912248	0.375415	0.999313	-5.16666
Q05519	SRSF11	PMA:SMES	-0.165598	12.9204	-0.912205	0.375437	0.999313	-5.16669
Q15048	LRRC14	PMA:SMES	0.398752	9.7014	0.912108	0.375487	0.999313	-5.16677
P61201	COPS2	PMA:SMES	-0.105345	13.7464	-0.911937	0.375574	0.999313	-5.1669
P62993	GRB2	PMA:SMES	-0.0830894	16.2674	-0.911908	0.375589	0.999313	-5.16692
Q9NVH6	TMLHE	PMA:SMES	0.179362	10.9179	0.911501	0.375797	0.999313	-5.16724
Q14669	TRIP12	PMA:SMES	-0.0837955	13.3941	-0.911125	0.375988	0.999313	-5.16753
Q9P2W9	STX18	PMA:SMES	0.321866	10.3749	0.911068	0.376018	0.999313	-5.16757
O75122	CLASP2	PMA:SMES	-0.123508	11.7881	-0.910574	0.37627	0.999313	-5.16795
O00562	PITPNM1	PMA:SMES	-0.0907039	12.391	-0.910418	0.37635	0.999313	-5.16807
Q9H4Z3	PCIF1	PMA:SMES	-0.120156	12.3169	-0.910158	0.376482	0.999313	-5.16827
P62269	RPS18	PMA:SMES	0.127704	16.7553	0.909543	0.376797	0.999313	-5.16875
P63244	RACK1	PMA:SMES	-0.0913149	16.1035	-0.908669	0.377244	0.999313	-5.16942
P23284	PPIB	PMA:SMES	0.0876381	17.8807	0.908516	0.377322	0.999313	-5.16954
Q9Y5X3	SNX5	PMA:SMES	-0.0969669	14.7047	-0.908485	0.377338	0.999313	-5.16956
Q9UNY4	TTF2	PMA:SMES	0.291441	11.1191	0.908482	0.37734	0.999313	-5.16957
P62861		PMA:SMES	-0.302071	15.2403	-0.90844	0.377361	0.999313	-5.1696
Q03468	ERCC6	PMA:SMES	-0.295852	11.0297	-0.907829	0.377674	0.999313	-5.17007
Q15700	DLG2	PMA:SMES	-0.282498	10.537	-0.907811	0.377684	0.999313	-5.17008
P41223	BUD31	PMA:SMES	0.258412	12.8869	0.907752	0.377714	0.999313	-5.17013
P35659	DEK	PMA:SMES	0.158865	15.5783	0.907727	0.377727	0.999313	-5.17015
Q8N1G2	CMTR1	PMA:SMES	0.140266	12.3007	0.906367	0.378424	0.999313	-5.17119
Q14849	STARD3	PMA:SMES	-0.119567	12.2565	-0.906176	0.378522	0.999313	-5.17134
Q66K74	MAP1S	PMA:SMES	-0.107906	14.5486	-0.906077	0.378572	0.999313	-5.17142
Q13325	IFIT5	PMA:SMES	0.24768	10.301	0.905601	0.378817	0.999313	-5.17178
O95644	NFATC1	PMA:SMES	-0.147047	11.2459	-0.905566	0.378835	0.999313	-5.17181
Q9H9E3	COG4	PMA:SMES	0.121524	11.5576	0.904971	0.37914	0.999313	-5.17227
Q9Y6K5	OAS3	PMA:SMES	-0.100846	13.7689	-0.904616	0.379323	0.999313	-5.17254
P11233	RALA	PMA:SMES	0.117692	16.7408	0.90425	0.379511	0.999313	-5.17282
Q9BYK8	HELZ2	PMA:SMES	-0.0856361	13.9802	-0.903764	0.379761	0.999313	-5.17319
Q14919	DRAP1	PMA:SMES	0.232124	14.2823	0.903645	0.379822	0.999313	-5.17328
Q9H307	PNN	PMA:SMES	-0.14117	14.5552	-0.903468	0.379913	0.999313	-5.17342
Q15257	PTPA	PMA:SMES	-0.102941	15.3637	-0.90335	0.379974	0.999313	-5.17351
Q09161	NCBP1	PMA:SMES	-0.0969081	13.5384	-0.903234	0.380033	0.999313	-5.1736
P61964	WDR5	PMA:SMES	-0.116061	13.2916	-0.903113	0.380096	0.999313	-5.17369
O14772	FPGT	PMA:SMES	-0.0906342	13.56	-0.902557	0.380382	0.999313	-5.17412
O75791	GRAP2	PMA:SMES	-0.0926117	12.472	-0.902332	0.380497	0.999313	-5.17429
Q9UHX3	ADGRE2	PMA:SMES	-0.161741	11.8768	-0.901662	0.380842	0.999313	-5.1748
Q9BTV4	TMEM43	PMA:SMES	0.142332	15.1757	0.90134	0.381008	0.999313	-5.17505
Q9HAU8	RNPEPL1	PMA:SMES	0.346471	12.67	0.901316	0.381021	0.999313	-5.17507
P28907	CD38	PMA:SMES	0.183637	11.3543	0.899924	0.381739	0.999313	-5.17613
P35241	RDX	PMA:SMES	0.189929	13.9779	0.899635	0.381888	0.999313	-5.17635
Q9NQV6	PRDM10	PMA:SMES	0.121455	13.6155	0.89932	0.382051	0.999313	-5.17659
Q7Z3T8	ZFYVE16	PMA:SMES	-0.0916981	12.6356	-0.899303	0.382059	0.999313	-5.17661
Q1KMD3	HNRNPUL2	PMA:SMES	-0.0740503	16.2492	-0.898837	0.3823	0.999313	-5.17696
Q9BSQ5	CCM2	PMA:SMES	-0.108569	11.8762	-0.898395	0.382528	0.999313	-5.1773
Q9Y5L0	TNPO3	PMA:SMES	-0.0836761	14.9172	-0.89817	0.382644	0.999313	-5.17747
P49773	HINT1	PMA:SMES	-0.164666	15.796	-0.898042	0.38271	0.999313	-5.17757
P36578	RPL4	PMA:SMES	-0.107157	15.7109	-0.897559	0.38296	0.999313	-5.17794
P43250	GRK6	PMA:SMES	-0.118402	14.6369	-0.896362	0.38358	0.999313	-5.17885
Q15843	NEDD8	PMA:SMES	0.212311	14.7393	0.895503	0.384024	0.999313	-5.1795
Q969G6	RFK	PMA:SMES	0.281648	10.854	0.895416	0.38407	0.999313	-5.17957
Q5H9R7	PPP6R3	PMA:SMES	0.0874163	13.1393	0.895243	0.384159	0.999313	-5.1797
Q9BWD1	ACAT2	PMA:SMES	0.0929295	15.5035	0.89502	0.384275	0.999313	-5.17987
Q6PJ69	TRIM65	PMA:SMES	-0.18674	11.2554	-0.894688	0.384447	0.999313	-5.18012
P60981	DSTN	PMA:SMES	-0.116785	14.2049	-0.894141	0.38473	0.999313	-5.18054
Q9BRP4	PAAF1	PMA:SMES	0.0956676	13.0801	0.894139	0.384732	0.999313	-5.18054
Q9UHQ9	CYB5R1	PMA:SMES	0.0960915	13.9977	0.894135	0.384733	0.999313	-5.18054
Q9NUE0	ZDHHC18	PMA:SMES	-0.324449	11.2341	-0.893747	0.384935	0.999313	-5.18084
P09913	IFIT2	PMA:SMES	-0.0945556	13.7083	-0.893584	0.38502	0.999313	-5.18096
A8MT19		PMA:SMES	0.349806	12.3355	0.893261	0.385187	0.999313	-5.1812
Q9HAU0	PLEKHA5	PMA:SMES	0.12059	13.5867	0.892057	0.385813	0.999313	-5.18212
Q8TD55	PLEKHO2	PMA:SMES	-0.0929022	15.2368	-0.891962	0.385862	0.999313	-5.18219
Q9NRY4	ARHGAP35	PMA:SMES	0.156362	12.9227	0.891478	0.386113	0.999313	-5.18256
Q9Y520	PRRC2C	PMA:SMES	-0.078702	14.7419	-0.891284	0.386214	0.999313	-5.1827
Q58A45	PAN3	PMA:SMES	0.102741	11.5249	0.891184	0.386267	0.999313	-5.18278
Q969T9	WBP2	PMA:SMES	-0.104131	14.2836	-0.891129	0.386295	0.999313	-5.18282
Q5JSJ4	INTS6L	PMA:SMES	0.146024	11.0018	0.8908	0.386466	0.999313	-5.18307
B0I1T2	MYO1G	PMA:SMES	-0.0754372	15.6237	-0.890721	0.386507	0.999313	-5.18313
P62306	SNRPF	PMA:SMES	-0.107067	15.4772	-0.890658	0.38654	0.999313	-5.18318
Q15181	PPA1	PMA:SMES	-0.137788	14.6539	-0.890468	0.386639	0.999313	-5.18332
Q9UNK0	STX8	PMA:SMES	-0.134852	12.8909	-0.890113	0.386824	0.999313	-5.18359
Q14203	DCTN1	PMA:SMES	-0.0884389	14.6486	-0.889525	0.38713	0.999313	-5.18403
Q86UA1	PRPF39	PMA:SMES	-0.229755	11.7296	-0.889215	0.387291	0.999313	-5.18427
P11678	EPX	PMA:SMES	0.168565	20.0545	0.888987	0.38741	0.999313	-5.18444
Q9Y3C4	TPRKB	PMA:SMES	-0.153464	13.267	-0.888832	0.387491	0.999313	-5.18456
O95400	CD2BP2	PMA:SMES	-0.170686	12.2598	-0.888356	0.387739	0.999313	-5.18492
Q7Z7G8	VPS13B	PMA:SMES	0.191736	13.5936	0.887798	0.38803	0.999313	-5.18534
O75608	LYPLA1	PMA:SMES	-0.15385	16.3389	-0.88754	0.388165	0.999313	-5.18553
Q15349	RPS6KA2	PMA:SMES	-0.0995727	14.3275	-0.887304	0.388288	0.999313	-5.18571
Q9Y2I7	PIKFYVE	PMA:SMES	0.0887431	12.3447	0.886979	0.388458	0.999313	-5.18596
Q9ULV0	MYO5B	PMA:SMES	0.224864	13.6029	0.886862	0.388519	0.999313	-5.18604
P02774	GC	PMA:SMES	0.267032	14.1518	0.886824	0.388539	0.999313	-5.18607
Q9H773	DCTPP1	PMA:SMES	-0.126745	12.4857	-0.884156	0.389933	0.999313	-5.18808
Q8WV22	NSMCE1	PMA:SMES	0.233493	10.1563	0.883775	0.390133	0.999313	-5.18837
O75531	BANF1	PMA:SMES	0.0980696	14.2262	0.883357	0.390352	0.999313	-5.18868
A6NGU5		PMA:SMES	0.0894404	13.2632	0.883294	0.390385	0.999313	-5.18873
O15162	PLSCR1	PMA:SMES	0.488451	13.0831	0.882477	0.390813	0.999313	-5.18934
Q8NHP1	AKR7L	PMA:SMES	0.180331	12.4087	0.882087	0.391017	0.999313	-5.18964
Q96K19	RNF170	PMA:SMES	0.320947	12.0315	0.881708	0.391216	0.999313	-5.18992
Q7L5Y1	ENOSF1	PMA:SMES	0.193163	11.1083	0.881448	0.391353	0.999313	-5.19012
O15372	EIF3H	PMA:SMES	-0.074995	14.1232	-0.880634	0.39178	0.999313	-5.19073
Q9UBB5	MBD2	PMA:SMES	0.265816	12.4218	0.880576	0.39181	0.999313	-5.19077
Q53H96	PYCR3	PMA:SMES	-0.143211	11.4056	-0.879783	0.392227	0.999313	-5.19136
Q9P2N5	RBM27	PMA:SMES	-0.0995351	12.2749	-0.879012	0.392632	0.999313	-5.19194
P05543	SERPINA7	PMA:SMES	0.282451	12.564	0.878322	0.392995	0.999313	-5.19246
P49750	YLPM1	PMA:SMES	0.0910567	12.6443	0.878321	0.392995	0.999313	-5.19246
Q9H5V9	STEEP1	PMA:SMES	-0.269704	10.3936	-0.878262	0.393026	0.999313	-5.1925
Q8IUR0	TRAPPC5	PMA:SMES	0.0946679	13.0374	0.877937	0.393198	0.999313	-5.19274
Q9H853		PMA:SMES	-0.0979859	17.5631	-0.877481	0.393437	0.999313	-5.19308
O95352	ATG7	PMA:SMES	-0.0797835	16.2144	-0.877382	0.39349	0.999313	-5.19316
P01730	CD4	PMA:SMES	0.152788	11.1893	0.876784	0.393805	0.999313	-5.19361
Q9H9J2	MRPL44	PMA:SMES	0.218464	11.0976	0.876561	0.393922	0.999313	-5.19377
Q5EBM0	CMPK2	PMA:SMES	0.12691	12.2915	0.876544	0.393931	0.999313	-5.19378
Q02790	FKBP4	PMA:SMES	-0.0839701	13.1993	-0.876363	0.394026	0.999313	-5.19392
O14602	EIF1AY	PMA:SMES	-0.20243	13.5181	-0.876355	0.39403	0.999313	-5.19392
Q9UKL0	RCOR1	PMA:SMES	0.117802	12.6874	0.87634	0.394038	0.999313	-5.19394
P41091	EIF2S3	PMA:SMES	-0.0698386	15.4324	-0.876177	0.394124	0.999313	-5.19406
Q9Y3D6	FIS1	PMA:SMES	0.128978	13.6401	0.875545	0.394458	0.999313	-5.19453
Q8NEQ5	C1orf162	PMA:SMES	-0.297124	11.9592	-0.874861	0.394819	0.999313	-5.19504
Q9Y487	ATP6V0A2	PMA:SMES	0.132994	14.194	0.874719	0.394893	0.999313	-5.19514
Q8IY17	PNPLA6	PMA:SMES	-0.0813895	12.7316	-0.874689	0.394909	0.999313	-5.19517
Q8NG11	TSPAN14	PMA:SMES	0.241074	13.8571	0.874195	0.39517	0.999313	-5.19553
O15511	ARPC5	PMA:SMES	0.0754696	19.1194	0.87369	0.395437	0.999313	-5.19591
Q2NL82	TSR1	PMA:SMES	0.207086	14.9088	0.873051	0.395775	0.999313	-5.19639
P35606	COPB2	PMA:SMES	-0.0694311	15.4116	-0.872811	0.395901	0.999313	-5.19656
O43776	NARS1	PMA:SMES	0.0785434	14.7718	0.872513	0.396059	0.999313	-5.19679
P00450	CP	PMA:SMES	0.1989	11.2471	0.872072	0.396292	0.999313	-5.19711
P08708	RPS17	PMA:SMES	0.339455	14.7003	0.871981	0.39634	0.999313	-5.19718
Q9Y2H6	FNDC3A	PMA:SMES	0.230133	10.2195	0.871492	0.396599	0.999313	-5.19754
Q8N4L2	PIP4P2	PMA:SMES	-0.137005	14.6789	-0.870448	0.397152	0.999313	-5.19832
Q13530	SERINC3	PMA:SMES	0.177347	12.6674	0.869951	0.397416	0.999313	-5.19869
Q3ZCQ8	TIMM50	PMA:SMES	0.138025	13.4053	0.869547	0.39763	0.999313	-5.19899
Q9UEU0	VTI1B	PMA:SMES	-0.230352	12.4351	-0.869218	0.397804	0.999313	-5.19923
Q69YN2	CWF19L1	PMA:SMES	-0.0884575	13.5372	-0.869193	0.397817	0.999313	-5.19925
Q9NRN7	AASDHPPT	PMA:SMES	0.102502	12.4703	0.869002	0.397919	0.999313	-5.19939
P11388	TOP2A	PMA:SMES	-0.106907	12.0395	-0.868857	0.397996	0.999313	-5.1995
P01834		PMA:SMES	0.184801	13.8527	0.868673	0.398093	0.999313	-5.19963
O43598	DNPH1	PMA:SMES	-0.111507	14.2951	-0.868576	0.398145	0.999313	-5.19971
Q8NF64	ZMIZ2	PMA:SMES	-0.239651	11.8167	-0.868214	0.398337	0.999313	-5.19997
Q04721	NOTCH2	PMA:SMES	-0.118642	11.6202	-0.867973	0.398465	0.999313	-5.20015
Q9NX40	OCIAD1	PMA:SMES	0.178338	12.2749	0.867775	0.39857	0.999313	-5.2003
Q8NDI1	EHBP1	PMA:SMES	-0.158487	11.147	-0.867661	0.398631	0.999313	-5.20038
Q96D46	NMD3	PMA:SMES	0.230049	10.8492	0.867145	0.398905	0.999313	-5.20076
Q92834	RPGR	PMA:SMES	0.20221	13.0502	0.866888	0.399041	0.999313	-5.20095
Q9NR31	SAR1A	PMA:SMES	-0.0802995	16.1197	-0.866505	0.399245	0.999313	-5.20124
Q96E11	MRRF	PMA:SMES	-0.141433	11.6739	-0.865514	0.399772	0.999313	-5.20197
Q9BTA9	WAC	PMA:SMES	-0.163632	11.8091	-0.865506	0.399776	0.999313	-5.20197
Q96FK6	WDR89	PMA:SMES	-0.211593	10.4697	-0.865307	0.399882	0.999313	-5.20212
Q14697	GANAB	PMA:SMES	-0.0946843	17.1804	-0.864996	0.400048	0.999313	-5.20235
P33121	ACSL1	PMA:SMES	-0.0928233	15.8889	-0.864784	0.400161	0.999313	-5.20251
P0C025	NUDT17	PMA:SMES	-0.278247	11.284	-0.864207	0.400468	0.999313	-5.20293
Q13123	IK	PMA:SMES	-0.130077	13.3528	-0.863846	0.40066	0.999313	-5.2032
Q15155	NOMO1	PMA:SMES	-0.0856736	12.9159	-0.863442	0.400876	0.999313	-5.2035
Q8N960	CEP120	PMA:SMES	-0.153525	10.8667	-0.86343	0.400882	0.999313	-5.2035
Q7Z460	CLASP1	PMA:SMES	-0.103361	13.5179	-0.862747	0.401246	0.999313	-5.20401
Q9H910	JPT2	PMA:SMES	-0.117466	11.3405	-0.862636	0.401305	0.999313	-5.20409
P22626	HNRNPA2B1	PMA:SMES	-0.0828217	18.6164	-0.86187	0.401714	0.999313	-5.20465
Q8TDP1	RNASEH2C	PMA:SMES	-0.13857	15.3831	-0.861694	0.401808	0.999313	-5.20478
P25685	DNAJB1	PMA:SMES	-0.095785	13.9207	-0.861464	0.401931	0.999313	-5.20495
P49419	ALDH7A1	PMA:SMES	-0.175683	11.838	-0.861399	0.401966	0.999313	-5.205
Q9NR50	EIF2B3	PMA:SMES	-0.130695	12.2922	-0.860925	0.402219	0.999313	-5.20535
Q9ULC5	ACSL5	PMA:SMES	0.142683	13.5765	0.860834	0.402267	0.999313	-5.20541
Q9H3M7	TXNIP	PMA:SMES	0.0771837	14.0379	0.86053	0.40243	0.999313	-5.20564
P24539	ATP5PB	PMA:SMES	-0.149327	15.3613	-0.86014	0.402639	0.999313	-5.20592
Q6GYQ0	RALGAPA1	PMA:SMES	-0.359371	8.87365	-0.860081	0.40267	0.999313	-5.20597
Q86TI2	DPP9	PMA:SMES	-0.0677834	13.4598	-0.860077	0.402672	0.999313	-5.20597
Q6DKI1	RPL7L1	PMA:SMES	-0.177908	10.2472	-0.859674	0.402888	0.999313	-5.20626
Q96CN7	ISOC1	PMA:SMES	-0.0878001	13.77	-0.859576	0.40294	0.999313	-5.20634
Q9UFP1	GASK1A	PMA:SMES	0.319931	11.5648	0.859524	0.402968	0.999313	-5.20637
Q70UQ0	IKBIP	PMA:SMES	-0.133287	11.4909	-0.859451	0.403007	0.999313	-5.20643
Q8TCT9	HM13	PMA:SMES	0.235093	15.6359	0.85828	0.403634	0.999313	-5.20729
Q5VT52	RPRD2	PMA:SMES	-0.199711	14.5361	-0.858193	0.40368	0.999313	-5.20735
P05186	ALPL	PMA:SMES	0.196998	12.7657	0.85816	0.403698	0.999313	-5.20737
Q01469	FABP5	PMA:SMES	-0.0561573	16.0392	-0.857947	0.403812	0.999313	-5.20753
Q9BX68	HINT2	PMA:SMES	-0.134041	12.1505	-0.857837	0.403871	0.999313	-5.20761
Q7L3T8	PARS2	PMA:SMES	-0.143457	10.5983	-0.85728	0.40417	0.999313	-5.20802
O95336	PGLS	PMA:SMES	-0.0918684	17.1475	-0.857229	0.404197	0.999313	-5.20806
O94927	HAUS5	PMA:SMES	-0.121897	11.8505	-0.857213	0.404205	0.999313	-5.20807
Q9NVM9	INTS13	PMA:SMES	-0.135283	12.0647	-0.856811	0.404421	0.999313	-5.20836
Q02094	RHAG	PMA:SMES	-0.219587	14.4856	-0.856582	0.404544	0.999313	-5.20853
O75140	DEPDC5	PMA:SMES	-0.119847	12.3245	-0.856536	0.404568	0.999313	-5.20856
Q9Y4P1	ATG4B	PMA:SMES	-0.111051	13.5095	-0.855689	0.405023	0.999313	-5.20918
O43678	NDUFA2	PMA:SMES	0.0821536	14.7646	0.855459	0.405146	0.999313	-5.20935
Q9H7N4	SCAF1	PMA:SMES	0.290636	9.04777	0.854972	0.405408	0.999313	-5.2097
P27449	ATP6V0C	PMA:SMES	0.193669	13.2069	0.854751	0.405526	0.999313	-5.20986
P12081	HARS1	PMA:SMES	-0.0653166	14.7261	-0.854147	0.405851	0.999313	-5.21031
Q6MZP7	LIN54	PMA:SMES	-0.320709	8.89508	-0.853129	0.406398	0.999313	-5.21105
Q96AY2	EME1	PMA:SMES	-0.288248	13.6049	-0.852812	0.406569	0.999313	-5.21128
P54840	GYS2	PMA:SMES	0.0987712	15.8976	0.85259	0.406688	0.999313	-5.21144
Q6XQN6	NAPRT	PMA:SMES	-0.104114	16.0106	-0.851939	0.407038	0.999313	-5.21191
Q9H0L4	CSTF2T	PMA:SMES	-0.119819	11.9402	-0.85158	0.407232	0.999313	-5.21217
Q96I15	SCLY	PMA:SMES	0.192793	13.1453	0.85122	0.407426	0.999313	-5.21244
P62314	SNRPD1	PMA:SMES	0.137193	15.6056	0.851155	0.407461	0.999313	-5.21248
Q6PJG2	MIDEAS	PMA:SMES	-0.0995603	13.7074	-0.850993	0.407548	0.999313	-5.2126
O43660	PLRG1	PMA:SMES	0.121755	11.6282	0.850984	0.407553	0.999313	-5.21261
P25786	PSMA1	PMA:SMES	-0.0890565	15.6157	-0.850605	0.407758	0.999313	-5.21288
Q9BZQ8	NIBAN1	PMA:SMES	0.0689306	15.8009	0.850135	0.408011	0.999313	-5.21322
Q13043	STK4	PMA:SMES	-0.107974	16.1612	-0.85003	0.408067	0.999313	-5.2133
P01111	NRAS	PMA:SMES	-0.108445	14.7224	-0.849906	0.408135	0.999313	-5.21339
Q9H223	EHD4	PMA:SMES	-0.0684544	13.919	-0.849862	0.408158	0.999313	-5.21342
P05771	PRKCB	PMA:SMES	-0.101298	15.0355	-0.849636	0.40828	0.999313	-5.21359
O43159	RRP8	PMA:SMES	-0.238191	10.0389	-0.848606	0.408836	0.999313	-5.21433
Q9Y2X0	MED16	PMA:SMES	-0.161823	11.0182	-0.848532	0.408876	0.999313	-5.21439
P46776	RPL27A	PMA:SMES	0.165118	17.1636	0.848463	0.408913	0.999313	-5.21444
P0CG12		PMA:SMES	-0.125349	13.3551	-0.848058	0.409132	0.999313	-5.21473
P13473	LAMP2	PMA:SMES	0.202969	17.1939	0.847964	0.409183	0.999313	-5.2148
P16104	H2AX	PMA:SMES	0.1176	22.4864	0.84794	0.409196	0.999313	-5.21482
O00459	PIK3R2	PMA:SMES	-0.0833179	13.4823	-0.847892	0.409222	0.999313	-5.21485
Q8N4V1	MMGT1	PMA:SMES	-0.18086	11.551	-0.847844	0.409248	0.999313	-5.21489
Q53FA7	TP53I3	PMA:SMES	0.0728074	14.9999	0.847416	0.409479	0.999313	-5.2152
O95819	MAP4K4	PMA:SMES	-0.110937	13.0105	-0.847177	0.409608	0.999313	-5.21537
Q9UHN1	POLG2	PMA:SMES	0.277772	10.8929	0.847067	0.409668	0.999313	-5.21545
P07093	SERPINE2	PMA:SMES	0.165954	12.1216	0.846844	0.409788	0.999313	-5.21561
P49674	CSNK1E	PMA:SMES	-0.174482	12.3291	-0.846354	0.410053	0.999313	-5.21596
Q96JA1	LRIG1	PMA:SMES	0.191783	12.6426	0.846353	0.410054	0.999313	-5.21596
Q9H7Z7	PTGES2	PMA:SMES	0.110106	12.047	0.845832	0.410336	0.999313	-5.21634
O95613	PCNT	PMA:SMES	-0.275708	11.5956	-0.845708	0.410403	0.999313	-5.21643
P48736	PIK3CG	PMA:SMES	0.0809978	13.0672	0.845625	0.410448	0.999313	-5.21649
Q16854	DGUOK	PMA:SMES	0.146597	12.2375	0.845351	0.410596	0.999313	-5.21669
Q8IW45	NAXD	PMA:SMES	0.149991	10.8227	0.845059	0.410754	0.999313	-5.2169
Q96BY6	DOCK10	PMA:SMES	0.0888842	13.5032	0.844763	0.410915	0.999313	-5.21711
O15228	GNPAT	PMA:SMES	0.106414	12.6066	0.84416	0.411242	0.999313	-5.21755
Q9BT23	LIMD2	PMA:SMES	-0.105893	13.9435	-0.843925	0.411369	0.999313	-5.21772
Q68EM7	ARHGAP17	PMA:SMES	0.102786	13.5619	0.843753	0.411463	0.999313	-5.21784
Q7Z6P3		PMA:SMES	-0.126049	14.6206	-0.843526	0.411585	0.999313	-5.21801
Q9Y385	UBE2J1	PMA:SMES	-0.182534	10.7964	-0.843485	0.411608	0.999313	-5.21804
O43166	SIPA1L1	PMA:SMES	-0.109666	11.6814	-0.843121	0.411805	0.999313	-5.2183
Q9NS28	RGS18	PMA:SMES	-0.286146	10.7635	-0.843083	0.411826	0.999313	-5.21833
P49458	SRP9	PMA:SMES	-0.087332	14.9689	-0.842218	0.412295	0.999313	-5.21895
Q9BTE3	MCMBP	PMA:SMES	0.0747005	12.4447	0.842084	0.412368	0.999313	-5.21904
P04844	RPN2	PMA:SMES	-0.100032	15.7226	-0.84196	0.412436	0.999313	-5.21913
Q5VUA4	ZNF318	PMA:SMES	0.279715	9.66433	0.841909	0.412463	0.999313	-5.21917
P38646	HSPA9	PMA:SMES	-0.079394	15.9927	-0.841784	0.412531	0.999313	-5.21926
Q8NHQ9	DDX55	PMA:SMES	-0.155077	10.3931	-0.839923	0.413542	0.999313	-5.2206
Q15120	PDK3	PMA:SMES	-0.0679506	14.4508	-0.838733	0.41419	0.999313	-5.22145
Q6UWD8	C16orf54	PMA:SMES	-0.210347	11.4337	-0.83859	0.414268	0.999313	-5.22156
O43324	EEF1E1	PMA:SMES	-0.0957024	13.5558	-0.838487	0.414325	0.999313	-5.22163
Q9BVA1	TUBB2B	PMA:SMES	-0.0883521	18.0552	-0.838158	0.414504	0.999313	-5.22187
P20618	PSMB1	PMA:SMES	0.109805	14.9972	0.837673	0.414768	0.999313	-5.22221
Q92783	STAM	PMA:SMES	-0.102942	12.6027	-0.837393	0.414921	0.999313	-5.22241
Q13185	CBX3	PMA:SMES	-0.208779	10.4742	-0.836888	0.415196	0.999313	-5.22278
Q9NPI6	DCP1A	PMA:SMES	-0.200293	10.4011	-0.836528	0.415393	0.999313	-5.22303
P42229	STAT5A	PMA:SMES	-0.0881608	15.7154	-0.835851	0.415762	0.999313	-5.22352
P18084	ITGB5	PMA:SMES	0.103935	18.9562	0.835431	0.415991	0.999313	-5.22382
Q9P0P0	RNF181	PMA:SMES	-0.121269	12.2614	-0.835408	0.416004	0.999313	-5.22383
O43491	EPB41L2	PMA:SMES	0.210077	10.6189	0.834933	0.416264	0.999313	-5.22417
Q9H081	MIS12	PMA:SMES	0.257864	12.5255	0.83486	0.416303	0.999313	-5.22423
P62304	SNRPE	PMA:SMES	0.141377	17.0488	0.833261	0.417178	0.999313	-5.22537
Q8TEV9	SMCR8	PMA:SMES	-0.0937851	10.9902	-0.832629	0.417524	0.999313	-5.22582
P61160	ACTR2	PMA:SMES	-0.101806	19.4439	-0.83244	0.417627	0.999313	-5.22595
Q9Y6G9	DYNC1LI1	PMA:SMES	0.0719067	13.6142	0.83229	0.417709	0.999313	-5.22606
Q9UL26	RAB22A	PMA:SMES	-0.174002	13.396	-0.832148	0.417787	0.999313	-5.22616
Q86VP6	CAND1	PMA:SMES	-0.0619235	15.8508	-0.831951	0.417895	0.999313	-5.2263
Q9HCG7	GBA2	PMA:SMES	-0.288125	8.77198	-0.83152	0.418131	0.999313	-5.22661
P61803	DAD1	PMA:SMES	-0.141329	14.8806	-0.83145	0.418169	0.999313	-5.22666
P36575	ARR3	PMA:SMES	0.208196	11.8239	0.831228	0.418291	0.999313	-5.22681
Q9NWQ8	PAG1	PMA:SMES	-0.113163	12.5449	-0.831196	0.418309	0.999313	-5.22684
P55008	AIF1	PMA:SMES	-0.14541	14.5841	-0.831164	0.418326	0.999313	-5.22686
Q96A33	CCDC47	PMA:SMES	0.13465	14.1202	0.831032	0.418399	0.999313	-5.22695
P00441	SOD1	PMA:SMES	0.14728	16.8227	0.83042	0.418734	0.999313	-5.22739
P11940	PABPC1	PMA:SMES	-0.0570718	15.6464	-0.830393	0.418749	0.999313	-5.22741
Q96T76	MMS19	PMA:SMES	-0.0736582	12.3119	-0.829724	0.419116	0.999313	-5.22788
Q9BRV8	SIKE1	PMA:SMES	-0.0918873	12.9176	-0.829662	0.41915	0.999313	-5.22793
Q8IZP2		PMA:SMES	0.109227	15.308	0.828916	0.41956	0.999313	-5.22846
Q5I7T1	ALG10B	PMA:SMES	0.155431	10.5201	0.828389	0.419849	0.999313	-5.22883
Q7Z392	TRAPPC11	PMA:SMES	0.0811396	13.2427	0.82809	0.420013	0.999313	-5.22904
P62195	PSMC5	PMA:SMES	-0.065716	14.1671	-0.828063	0.420028	0.999313	-5.22906
Q14161	GIT2	PMA:SMES	-0.087381	14.2337	-0.828008	0.420058	0.999313	-5.2291
P30050	RPL12	PMA:SMES	0.182794	16.4076	0.826848	0.420696	0.999313	-5.22992
Q9Y5W8	SNX13	PMA:SMES	-0.172069	11.1688	-0.826704	0.420776	0.999313	-5.23003
Q9P0M6	MACROH2A2	PMA:SMES	0.127693	14.1428	0.826105	0.421105	0.999313	-5.23045
Q15020	SART3	PMA:SMES	-0.0601638	13.6968	-0.826031	0.421145	0.999313	-5.2305
Q16740	CLPP	PMA:SMES	-0.130107	11.6418	-0.825653	0.421354	0.999313	-5.23077
O15143	ARPC1B	PMA:SMES	0.0619333	19.5825	0.825261	0.42157	0.999313	-5.23105
Q8WUA7	TBC1D22A	PMA:SMES	0.0740577	13.0463	0.824953	0.42174	0.999313	-5.23126
P51970	NDUFA8	PMA:SMES	0.166528	12.8162	0.824774	0.421838	0.999313	-5.23139
P43487	RANBP1	PMA:SMES	0.0835323	14.475	0.823791	0.42238	0.999313	-5.23208
Q9NZ32	ACTR10	PMA:SMES	0.0709985	12.465	0.823534	0.422522	0.999313	-5.23227
Q15025	TNIP1	PMA:SMES	-0.0894466	12.9345	-0.823345	0.422626	0.999313	-5.2324
O60673	REV3L	PMA:SMES	0.149768	13.5175	0.823299	0.422652	0.999313	-5.23243
P38606	ATP6V1A	PMA:SMES	-0.069921	16.1825	-0.822188	0.423265	0.999313	-5.23322
Q15435	PPP1R7	PMA:SMES	0.0668763	15.8331	0.822093	0.423317	0.999313	-5.23328
Q9NRF8	CTPS2	PMA:SMES	0.0706651	13.9945	0.821102	0.423865	0.999313	-5.23398
A6NJG2	SOWAHD	PMA:SMES	-0.359907	10.3293	-0.820457	0.424221	0.999313	-5.23443
Q4VC31	MIX23	PMA:SMES	-0.097891	12.5185	-0.820453	0.424224	0.999313	-5.23444
Q13501	SQSTM1	PMA:SMES	-0.129638	11.9296	-0.820299	0.424309	0.999313	-5.23454
P04233	CD74	PMA:SMES	-0.15815	12.8285	-0.818379	0.425372	0.999313	-5.23589
Q13637	RAB32	PMA:SMES	0.0656662	16.6837	0.818022	0.42557	0.999313	-5.23614
O76021	RSL1D1	PMA:SMES	-0.158706	11.6456	-0.817923	0.425625	0.999313	-5.23621
P09917	ALOX5	PMA:SMES	-0.100414	17.0591	-0.817867	0.425656	0.999313	-5.23625
P21796	VDAC1	PMA:SMES	0.0844088	15.2855	0.817811	0.425686	0.999313	-5.23629
P56211	ARPP19	PMA:SMES	-0.0723226	14.5603	-0.817273	0.425985	0.999313	-5.23667
Q9BRR9	ARHGAP9	PMA:SMES	-0.139794	15.9345	-0.816485	0.426422	0.999313	-5.23722
Q9UNS2	COPS3	PMA:SMES	-0.10902	13.018	-0.816207	0.426576	0.999313	-5.23741
O15427	SLC16A3	PMA:SMES	0.138923	15.6175	0.815373	0.427039	0.999313	-5.238
Q9H0J9	PARP12	PMA:SMES	0.123433	12.1236	0.815369	0.427042	0.999313	-5.238
P13498	CYBA	PMA:SMES	0.137577	17.9123	0.815044	0.427222	0.999313	-5.23823
P24557	TBXAS1	PMA:SMES	-0.0560641	14.3825	-0.814838	0.427337	0.999313	-5.23837
O00571	DDX3X	PMA:SMES	-0.0626474	15.1269	-0.814605	0.427466	0.999313	-5.23853
Q96JM3	CHAMP1	PMA:SMES	0.09969	11.9213	0.814423	0.427567	0.999313	-5.23866
P98196	ATP11A	PMA:SMES	-0.112165	11.9621	-0.814315	0.427627	0.999313	-5.23874
P61978	HNRNPK	PMA:SMES	-0.131915	17.3746	-0.813995	0.427805	0.999313	-5.23896
[truncated: 3,455 more rows]

## Sheet: PMA_SMES_AR02
accession	gene_symbol	coef	logFC	AveExpr	t	P.Value	adj.P.Val	B
Q969P6	TOP1MT	PMA:SMES:AR02	3.24796	14.9081	9.04527	1.25679e-07	0.000685455	7.1652
Q96GX5	MASTL	PMA:SMES:AR02	1.86798	14.6275	8.02141	6.04371e-07	0.00164812	5.90858
Q7Z406	MYH14	PMA:SMES:AR02	1.63876	17.9479	6.05104	1.81378e-05	0.0317578	3.01997
P35754	GLRX	PMA:SMES:AR02	-1.06035	19.1115	-5.80735	2.86542e-05	0.0317578	2.61764
P51159	RAB27A	PMA:SMES:AR02	1.36149	16.9317	5.56941	4.5128e-05	0.0317578	2.21546
P19338	NCL	PMA:SMES:AR02	0.775002	15.4915	5.52287	4.93638e-05	0.0317578	2.13573
Q96BX8	MOB3A	PMA:SMES:AR02	-0.908707	15.162	-5.51599	5.00242e-05	0.0317578	2.12391
Q15427	SF3B4	PMA:SMES:AR02	-1.0496	11.943	-5.4966	5.19342e-05	0.0317578	2.09058
O43236	SEPTIN4	PMA:SMES:AR02	-0.838885	13.807	-5.49193	5.24056e-05	0.0317578	2.08254
Q16762	TST	PMA:SMES:AR02	-0.553528	14.1811	-5.26723	8.12024e-05	0.0427447	1.69183
P07305	H1-0	PMA:SMES:AR02	1.78732	16.1001	5.22344	8.85034e-05	0.0427447	1.61479
Q9Y639	NPTN	PMA:SMES:AR02	1.38407	12.4576	5.17999	9.64179e-05	0.0427447	1.53807
Q9HD15	SRA1	PMA:SMES:AR02	-0.702823	13.9805	-5.13161	0.000106094	0.0427447	1.45234
Q9UHX1	PUF60	PMA:SMES:AR02	-0.569935	14.0669	-5.11463	0.000109722	0.0427447	1.42217
Q9UKL6	PCTP	PMA:SMES:AR02	-0.673821	13.5227	-4.99102	0.000140306	0.0498755	1.20129
P35030	PRSS3	PMA:SMES:AR02	-1.29723	12.944	-4.95693	0.000150197	0.0498755	1.14
O75438	NDUFB1	PMA:SMES:AR02	-1.42598	10.06	-4.93971	0.000155461	0.0498755	1.109
P09417	QDPR	PMA:SMES:AR02	-0.535643	14.7755	-4.80961	0.000201908	0.0570066	0.873396
A8MXV4	NUDT19	PMA:SMES:AR02	-1.60253	13.3063	-4.79498	0.000207956	0.0570066	0.846764
Q9UJZ1	STOML2	PMA:SMES:AR02	-0.838541	13.101	-4.77885	0.000214842	0.0570066	0.817361
Q9Y4F1	FARP1	PMA:SMES:AR02	-0.961727	13.3049	-4.76824	0.000219497	0.0570066	0.798011
Q16594	TAF9	PMA:SMES:AR02	-0.938819	13.5878	-4.69931	0.000252371	0.062565	0.671946
Q13404	UBE2V1	PMA:SMES:AR02	-0.56871	16.3643	-4.67565	0.000264782	0.0627878	0.62855
Q8TAF3	WDR48	PMA:SMES:AR02	-0.678675	12.8992	-4.65063	0.000278592	0.0633099	0.582578
P42356	PI4KA	PMA:SMES:AR02	-0.586877	18.5511	-4.57219	0.000326852	0.0656972	0.43801
Q86XE0	SNX32	PMA:SMES:AR02	-1.97528	9.43972	-4.56655	0.000330639	0.0656972	0.427581
P42679	MATK	PMA:SMES:AR02	-0.853046	15.297	-4.55065	0.000341545	0.0656972	0.398195
P07203	GPX1	PMA:SMES:AR02	-0.478163	15.9382	-4.54285	0.000347034	0.0656972	0.383755
Q9H4K7	MTG2	PMA:SMES:AR02	-1.2031	10.7088	-4.52905	0.000356961	0.0656972	0.358209
Q9ULD2	MTUS1	PMA:SMES:AR02	-1.06539	11.9803	-4.4789	0.000395557	0.0656972	0.265179
P62888	RPL30	PMA:SMES:AR02	-0.557568	15.6633	-4.47366	0.000399829	0.0656972	0.25544
Q2TAY7	SMU1	PMA:SMES:AR02	-0.673343	13.9	-4.47317	0.000400231	0.0656972	0.25453
Q92599	SEPTIN8	PMA:SMES:AR02	-0.598118	16.1471	-4.45909	0.000411951	0.0656972	0.228365
Q14694	USP10	PMA:SMES:AR02	-0.58464	12.1451	-4.40374	0.000461541	0.0656972	0.125283
O75132	ZBED4	PMA:SMES:AR02	-0.874669	15.0348	-4.3944	0.000470493	0.0656972	0.107856
P25325	MPST	PMA:SMES:AR02	-0.519007	14.4528	-4.38429	0.000480372	0.0656972	0.0890027
Q6GMV3	PTRHD1	PMA:SMES:AR02	-0.876567	12.879	-4.36414	0.00050072	0.0656972	0.0513576
O75695	RP2	PMA:SMES:AR02	-0.425397	17.1563	-4.34803	0.00051761	0.0656972	0.02125
Q8TAT6	NPLOC4	PMA:SMES:AR02	-0.462862	13.0702	-4.33757	0.000528897	0.0656972	0.00166865
Q9NTN3	SLC35D1	PMA:SMES:AR02	-0.849817	11.8138	-4.33338	0.000533484	0.0656972	-0.00616839
P61457	PCBD1	PMA:SMES:AR02	0.568842	13.5839	4.33133	0.000535746	0.0656972	-0.0100093
Q9Y4Z0	LSM4	PMA:SMES:AR02	-0.796434	13.8523	-4.32154	0.000546668	0.0656972	-0.0283305
P57764	GSDMD	PMA:SMES:AR02	-0.769356	14.8633	-4.30252	0.000568546	0.0656972	-0.0639597
Q8TE77	SSH3	PMA:SMES:AR02	-0.600511	16.8364	-4.30242	0.000568659	0.0656972	-0.0641389
Q9H4G4	GLIPR2	PMA:SMES:AR02	-0.761245	16.2009	-4.30206	0.000569083	0.0656972	-0.064817
Q9GZQ3	COMMD5	PMA:SMES:AR02	-0.746801	14.0248	-4.30087	0.00057049	0.0656972	-0.067058
Q9H792	PEAK1	PMA:SMES:AR02	-2.25605	12.5511	-4.30064	0.000570761	0.0656972	-0.0674892
O95168	NDUFB4	PMA:SMES:AR02	-0.610139	13.8008	-4.28736	0.000586624	0.0656972	-0.0923838
P0C0S5	H2AZ1	PMA:SMES:AR02	1.24219	16.9966	4.28439	0.000590239	0.0656972	-0.0979626
P05386	RPLP1	PMA:SMES:AR02	-1.8062	14.8676	-4.24901	0.000635012	0.0685696	-0.164372
Q12789	GTF3C1	PMA:SMES:AR02	-0.43974	16.9697	-4.23951	0.000647608	0.0685696	-0.182216
O43678	NDUFA2	PMA:SMES:AR02	-0.575162	14.7646	-4.23494	0.000653762	0.0685696	-0.190809
P80217	IFI35	PMA:SMES:AR02	-0.721951	15.5178	-4.2136	0.000683286	0.0691982	-0.230941
Q6IS14	EIF5AL1	PMA:SMES:AR02	1.93307	14.2671	4.17608	0.000738524	0.0691982	-0.301587
Q8WYA6	CTNNBL1	PMA:SMES:AR02	-0.69065	13.5596	-4.16885	0.000749682	0.0691982	-0.315216
Q9ULA0	DNPEP	PMA:SMES:AR02	-0.754875	14.2201	-4.1656	0.000754759	0.0691982	-0.321352
P52815	MRPL12	PMA:SMES:AR02	-0.561914	13.1321	-4.14771	0.000783285	0.0691982	-0.355073
Q92747	ARPC1A	PMA:SMES:AR02	-0.550383	13.9978	-4.14334	0.00079042	0.0691982	-0.363316
O75348	ATP6V1G1	PMA:SMES:AR02	-0.466665	16.6082	-4.14186	0.000792864	0.0691982	-0.366122
Q00526	CDK3	PMA:SMES:AR02	2.24707	12.7101	4.1279	0.00081617	0.0691982	-0.39246
P43490	NAMPT	PMA:SMES:AR02	-0.513017	18.6789	-4.12447	0.000822007	0.0691982	-0.398939
O76003	GLRX3	PMA:SMES:AR02	-0.572661	14.6671	-4.11993	0.000829789	0.0691982	-0.407505
Q9H853		PMA:SMES:AR02	-0.650132	17.5631	-4.11681	0.000835189	0.0691982	-0.413403
Q15910	EZH2	PMA:SMES:AR02	-0.869097	16.1511	-4.11575	0.00083703	0.0691982	-0.415404
Q9UBI9	HECA	PMA:SMES:AR02	-0.863203	10.8189	-4.10522	0.000855543	0.0691982	-0.435295
P49023	PXN	PMA:SMES:AR02	-0.664768	14.7549	-4.10121	0.000862694	0.0691982	-0.442863
Q14166	TTLL12	PMA:SMES:AR02	-0.702286	15.2576	-4.09818	0.00086815	0.0691982	-0.448595
Q99549	MPHOSPH8	PMA:SMES:AR02	-0.698017	12.7929	-4.09406	0.000875613	0.0691982	-0.456379
Q99487	PAFAH2	PMA:SMES:AR02	-0.806478	11.6112	-4.06812	0.000924132	0.0691982	-0.50542
P63279	UBE2I	PMA:SMES:AR02	-0.702056	17.365	-4.06724	0.000925833	0.0691982	-0.507093
Q9HA64	FN3KRP	PMA:SMES:AR02	-0.825425	14.1305	-4.05316	0.00095336	0.0691982	-0.533738
Q96CW1	AP2M1	PMA:SMES:AR02	-0.395697	15.0676	-4.04949	0.000960657	0.0691982	-0.540672
P17213	BPI	PMA:SMES:AR02	-0.523189	19.415	-4.04247	0.000974792	0.0691982	-0.553956
P53675	CLTCL1	PMA:SMES:AR02	-1.46345	12.3776	-4.02625	0.00100829	0.0691982	-0.584686
P20839	IMPDH1	PMA:SMES:AR02	-0.459902	15.2468	-4.01943	0.0010227	0.0691982	-0.597593
O75629	CREG1	PMA:SMES:AR02	-1.05517	13.6331	-4.0073	0.00104889	0.0691982	-0.62059
Q15418	RPS6KA1	PMA:SMES:AR02	-0.567494	14.9334	-4.00718	0.00104913	0.0691982	-0.620806
Q15393	SF3B3	PMA:SMES:AR02	-0.434663	14.6247	-4.00711	0.00104929	0.0691982	-0.620937
Q08945	SSRP1	PMA:SMES:AR02	-0.386097	14.3268	-4.00515	0.00105359	0.0691982	-0.624663
Q9BR76	CORO1B	PMA:SMES:AR02	-0.384455	14.7287	-4.00217	0.00106014	0.0691982	-0.630299
C9JLW8	MCRIP1	PMA:SMES:AR02	-1.11633	11.3156	-4.00213	0.00106024	0.0691982	-0.630386
Q14050	COL9A3	PMA:SMES:AR02	-2.69624	12.1236	-3.99045	0.00108636	0.0691982	-0.652518
Q9NVI1	FANCI	PMA:SMES:AR02	0.897107	14.4921	3.98806	0.00109178	0.0691982	-0.657047
O14920	IKBKB	PMA:SMES:AR02	-0.471588	13.8152	-3.97297	0.00112669	0.0691982	-0.685677
P52333	JAK3	PMA:SMES:AR02	-0.902522	11.2912	-3.96965	0.0011345	0.0691982	-0.691963
P51665	PSMD7	PMA:SMES:AR02	-0.546314	15.4387	-3.96532	0.00114479	0.0691982	-0.700178
Q92945	KHSRP	PMA:SMES:AR02	-0.505592	15.5563	-3.96332	0.00114958	0.0691982	-0.703974
Q9BV68	RNF126	PMA:SMES:AR02	-0.680576	13.2246	-3.95502	0.00116966	0.0691982	-0.719726
Q9NYU2	UGGT1	PMA:SMES:AR02	-0.427177	14.3654	-3.94543	0.00119328	0.0691982	-0.737921
O75521	ECI2	PMA:SMES:AR02	-0.98572	11.0866	-3.94498	0.0011944	0.0691982	-0.738772
Q13557	CAMK2D	PMA:SMES:AR02	-0.691883	15.1783	-3.94203	0.00120177	0.0691982	-0.74437
P15531	NME1	PMA:SMES:AR02	-0.823677	16.1324	-3.94068	0.00120516	0.0691982	-0.746933
P21399	ACO1	PMA:SMES:AR02	-0.505595	15.4068	-3.93953	0.00120808	0.0691982	-0.749131
Q92890	UFD1	PMA:SMES:AR02	-0.460734	15.449	-3.93818	0.00121148	0.0691982	-0.751686
P08519		PMA:SMES:AR02	-1.54169	10.5491	-3.93393	0.00122227	0.0691982	-0.759753
P48736	PIK3CG	PMA:SMES:AR02	-0.532342	13.0672	-3.92988	0.00123264	0.0691982	-0.767438
P49207	RPL34	PMA:SMES:AR02	1.61937	14.4225	3.92606	0.00124251	0.0691982	-0.774699
Q9H479	FN3K	PMA:SMES:AR02	-0.972125	11.1438	-3.9172	0.0012657	0.0691982	-0.791518
Q9NZN8	CNOT2	PMA:SMES:AR02	-0.978267	11.179	-3.9125	0.0012782	0.0691982	-0.800463
P21333	FLNA	PMA:SMES:AR02	-0.462111	18.5847	-3.90482	0.00129886	0.0691982	-0.815048
P48643	CCT5	PMA:SMES:AR02	-0.370766	15.7117	-3.89633	0.00132208	0.0691982	-0.831166
Q9UFC0	LRWD1	PMA:SMES:AR02	-0.783985	14.6534	-3.89251	0.00133268	0.0691982	-0.838437
Q96SB4	SRPK1	PMA:SMES:AR02	-0.662303	13.7032	-3.89108	0.00133666	0.0691982	-0.841146
Q13114	TRAF3	PMA:SMES:AR02	-1.11386	10.799	-3.88917	0.00134202	0.0691982	-0.84479
Q92630	DYRK2	PMA:SMES:AR02	1.22619	15.831	3.88474	0.00135449	0.0691982	-0.8532
Q96AH0	NABP1	PMA:SMES:AR02	-0.843368	12.0454	-3.88156	0.00136351	0.0691982	-0.859243
P16930	FAH	PMA:SMES:AR02	-0.426263	15.8297	-3.88057	0.00136634	0.0691982	-0.861128
P30273	FCER1G	PMA:SMES:AR02	1.19219	16.521	3.877	0.00137657	0.0691982	-0.867916
Q5JSJ4	INTS6L	PMA:SMES:AR02	-0.897765	11.0018	-3.8726	0.00138929	0.0691982	-0.876282
O43633	CHMP2A	PMA:SMES:AR02	0.566121	15.1258	3.87042	0.00139564	0.0691982	-0.880429
P13489	RNH1	PMA:SMES:AR02	-0.509582	18.0387	-3.85614	0.00143789	0.0703249	-0.907568
A0A1B0GUS4		PMA:SMES:AR02	-0.779808	15.4129	-3.85407	0.00144415	0.0703249	-0.911516
P49321	NASP	PMA:SMES:AR02	0.78908	13.2028	3.83391	0.0015063	0.0710051	-0.949849
Q53GL7	PARP10	PMA:SMES:AR02	-0.603368	13.1444	-3.8316	0.0015136	0.0710051	-0.954247
Q9C037	TRIM4	PMA:SMES:AR02	-0.605431	12.8136	-3.82748	0.00152668	0.0710051	-0.962077
Q8TAQ5	ZNF420	PMA:SMES:AR02	-0.75434	16.5782	-3.82602	0.00153137	0.0710051	-0.964867
P26358	DNMT1	PMA:SMES:AR02	-0.918704	12.0855	-3.82409	0.00153756	0.0710051	-0.96854
P02679	FGG	PMA:SMES:AR02	-0.562524	14.0607	-3.81961	0.00155202	0.0710051	-0.977057
Q9Y2U5	MAP3K2	PMA:SMES:AR02	-0.545156	13.4126	-3.81747	0.00155898	0.0710051	-0.981126
Q15833	STXBP2	PMA:SMES:AR02	-0.434671	16.4215	-3.81647	0.00156227	0.0710051	-0.983043
Q9BTE1	DCTN5	PMA:SMES:AR02	-1.32154	11.9565	-3.80779	0.00159089	0.0712997	-0.999558
Q96QG7	MTMR9	PMA:SMES:AR02	-0.616319	12.6629	-3.80658	0.0015949	0.0712997	-1.00185
P48730	CSNK1D	PMA:SMES:AR02	-0.459866	12.2445	-3.80101	0.00161362	0.071309	-1.01246
Q9UHB7	AFF4	PMA:SMES:AR02	-1.00967	11.6293	-3.7875	0.00165987	0.071309	-1.03817
Q96NB2	SFXN2	PMA:SMES:AR02	-0.688062	12.1274	-3.78365	0.00167329	0.071309	-1.0455
Q5VWQ0	RSBN1	PMA:SMES:AR02	-0.916323	11.5372	-3.77955	0.00168771	0.071309	-1.0533
Q9NRH3	TUBG2	PMA:SMES:AR02	1.30964	13.6263	3.77601	0.00170025	0.071309	-1.06004
Q9H1A7		PMA:SMES:AR02	-0.827994	12.4909	-3.77302	0.00171092	0.071309	-1.06573
Q5JSP0	FGD3	PMA:SMES:AR02	-0.473082	15.9027	-3.77291	0.00171132	0.071309	-1.06595
Q70E73	RAPH1	PMA:SMES:AR02	0.98154	13.306	3.77134	0.00171697	0.071309	-1.06894
O75113	N4BP1	PMA:SMES:AR02	-0.514688	12.8908	-3.77098	0.00171826	0.071309	-1.06963
P01876		PMA:SMES:AR02	-1.15729	11.9507	-3.76887	0.00172585	0.071309	-1.07364
Q53GS7	GLE1	PMA:SMES:AR02	-0.430974	12.9946	-3.76511	0.00173947	0.0713314	-1.08079
Q14692	BMS1	PMA:SMES:AR02	-1.08238	9.71522	-3.75094	0.00179187	0.0722887	-1.10778
P28070	PSMB4	PMA:SMES:AR02	-0.472493	15.7888	-3.7498	0.00179612	0.0722887	-1.10994
A8MVS5	C19orf38	PMA:SMES:AR02	-1.03408	15.0892	-3.74809	0.00180258	0.0722887	-1.11321
Q13439	GOLGA4	PMA:SMES:AR02	0.762137	12.8416	3.73811	0.00184062	0.072836	-1.1322
Q7Z6M1	RABEPK	PMA:SMES:AR02	-0.818614	11.1987	-3.73751	0.00184294	0.072836	-1.13335
P07902	GALT	PMA:SMES:AR02	-0.676197	13.3294	-3.73233	0.00186304	0.0731008	-1.14322
P35475	IDUA	PMA:SMES:AR02	0.842236	11.0379	3.72721	0.00188313	0.0732409	-1.15297
Q9ULZ3	PYCARD	PMA:SMES:AR02	-0.734494	18.4862	-3.72334	0.00189847	0.0732409	-1.16035
O00186	STXBP3	PMA:SMES:AR02	-0.476698	14.5254	-3.72122	0.00190689	0.0732409	-1.16438
Q9NQ11	ATP13A2	PMA:SMES:AR02	-1.0337	11.2686	-3.71725	0.00192283	0.0732656	-1.17195
Q96DM3	RMC1	PMA:SMES:AR02	-0.435725	13.5025	-3.71438	0.00193441	0.0732656	-1.17741
O00629	KPNA4	PMA:SMES:AR02	0.617651	12.8939	3.70597	0.00196876	0.0740527	-1.19342
Q86YS7	C2CD5	PMA:SMES:AR02	-0.526182	13.2825	-3.69515	0.00201391	0.074723	-1.21404
Q6NVV1		PMA:SMES:AR02	2.698	13.2199	3.69513	0.00201399	0.074723	-1.21408
Q6NZY4	ZCCHC8	PMA:SMES:AR02	-0.677518	12.0481	-3.68168	0.00207154	0.0750573	-1.2397
Q13627	DYRK1A	PMA:SMES:AR02	-0.677355	12.1652	-3.67897	0.00208335	0.0750573	-1.24487
Q9NRN7	AASDHPPT	PMA:SMES:AR02	-0.613024	12.4703	-3.67496	0.00210091	0.0750573	-1.2525
P26368	U2AF2	PMA:SMES:AR02	-0.509169	16.5475	-3.67443	0.00210326	0.0750573	-1.25352
P57088	TMEM33	PMA:SMES:AR02	-0.443153	14.9513	-3.67282	0.00211034	0.0750573	-1.25658
P68402	PAFAH1B2	PMA:SMES:AR02	-0.607747	16.6296	-3.66418	0.00214891	0.0750573	-1.27305
P28062	PSMB8	PMA:SMES:AR02	-0.39024	15.3057	-3.66212	0.00215821	0.0750573	-1.27697
Q9NPF4	OSGEP	PMA:SMES:AR02	-0.501581	13.6979	-3.66118	0.00216247	0.0750573	-1.27877
Q8IY95	TMEM192	PMA:SMES:AR02	-0.73616	12.0307	-3.65673	0.00218271	0.0750573	-1.28724
Q9C0B1	FTO	PMA:SMES:AR02	-0.675962	11.6112	-3.65376	0.00219633	0.0750573	-1.2929
Q8TEA8	DTD1	PMA:SMES:AR02	1.14271	11.5548	3.65172	0.00220574	0.0750573	-1.29678
P08246	ELANE	PMA:SMES:AR02	-1.28794	18.7516	-3.64929	0.00221701	0.0750573	-1.30142
Q86TV6	TTC7B	PMA:SMES:AR02	-0.914044	11.5666	-3.64641	0.00223043	0.0750573	-1.3069
Q96KP1	EXOC2	PMA:SMES:AR02	-0.767838	15.7869	-3.64567	0.0022339	0.0750573	-1.30832
Q8IVV7	GID4	PMA:SMES:AR02	-0.985997	10.5115	-3.64495	0.00223724	0.0750573	-1.30968
P13725	OSM	PMA:SMES:AR02	-2.06434	12.6336	-3.64352	0.00224396	0.0750573	-1.3124
B5ME19	EIF3CL	PMA:SMES:AR02	-0.490661	15.9778	-3.64077	0.00225695	0.0750573	-1.31765
Q9HAU4	SMURF2	PMA:SMES:AR02	-0.60391	17.4675	-3.63292	0.00229439	0.0756473	-1.33261
Q6PJG2	MIDEAS	PMA:SMES:AR02	-0.600351	13.7074	-3.62853	0.0023156	0.0756473	-1.34098
A3KN83	SBNO1	PMA:SMES:AR02	-0.620444	11.8899	-3.62729	0.00232159	0.0756473	-1.34333
Q9Y3R5	DOP1B	PMA:SMES:AR02	-0.402943	14.5644	-3.62356	0.00233981	0.0756473	-1.35043
P45983	MAPK8	PMA:SMES:AR02	-0.685899	13.5124	-3.6227	0.00234404	0.0756473	-1.35208
Q5JRA6	MIA3	PMA:SMES:AR02	-0.469497	14.4911	-3.61621	0.00237616	0.0762216	-1.36445
Q8WXA9	SREK1	PMA:SMES:AR02	-0.970336	11.4752	-3.61348	0.00238979	0.0762216	-1.36965
Q9NR28	DIABLO	PMA:SMES:AR02	-0.499469	12.9802	-3.59903	0.00246325	0.077068	-1.39717
Q6UXN9	WDR82	PMA:SMES:AR02	-0.453835	14.1678	-3.5956	0.00248105	0.077068	-1.40372
P00846	ATP6	PMA:SMES:AR02	-0.728741	14.7173	-3.59412	0.00248871	0.077068	-1.40652
P00390	GSR	PMA:SMES:AR02	-0.536972	18.142	-3.59302	0.00249449	0.077068	-1.40863
P41252	IARS1	PMA:SMES:AR02	-0.36602	15.0861	-3.58968	0.00251202	0.077068	-1.41499
O15116	LSM1	PMA:SMES:AR02	-0.74244	13.9582	-3.58578	0.0025326	0.077068	-1.42241
P07766	CD3E	PMA:SMES:AR02	0.954819	10.6552	3.58511	0.00253618	0.077068	-1.42369
P30048	PRDX3	PMA:SMES:AR02	-0.500131	17.4869	-3.5801	0.00256296	0.077068	-1.43324
Q96KP4	CNDP2	PMA:SMES:AR02	-0.396246	15.1414	-3.57648	0.00258245	0.077068	-1.44013
Q14194	CRMP1	PMA:SMES:AR02	-0.46087	15.3277	-3.57594	0.00258539	0.077068	-1.44116
P48147	PREP	PMA:SMES:AR02	-0.523154	14.0627	-3.57559	0.00258727	0.077068	-1.44182
Q07960	ARHGAP1	PMA:SMES:AR02	-0.528557	16.9668	-3.5741	0.00259536	0.077068	-1.44466
Q7Z6J0	SH3RF1	PMA:SMES:AR02	1.16302	11.7517	3.57325	0.00260002	0.077068	-1.44629
P20339	RAB5A	PMA:SMES:AR02	-0.419823	18.9086	-3.56748	0.00263163	0.0773656	-1.45727
O60244	MED14	PMA:SMES:AR02	-0.602722	11.6702	-3.56401	0.00265087	0.0773656	-1.46389
Q9UBQ5	EIF3K	PMA:SMES:AR02	-0.536334	14.1626	-3.56369	0.00265261	0.0773656	-1.46449
O43684	BUB3	PMA:SMES:AR02	-0.46224	15.0574	-3.55802	0.00268432	0.0776261	-1.47529
O95825	CRYZL1	PMA:SMES:AR02	-0.425407	12.9386	-3.55665	0.00269204	0.0776261	-1.4779
P01857		PMA:SMES:AR02	-0.947664	15.5396	-3.55202	0.0027183	0.0776261	-1.48672
Q9BQF6	SENP7	PMA:SMES:AR02	-0.754041	11.805	-3.55199	0.00271848	0.0776261	-1.48678
Q9HB58	SP110	PMA:SMES:AR02	-0.787595	13.3095	-3.54547	0.00275591	0.0781736	-1.49921
P11215	ITGAM	PMA:SMES:AR02	-0.401458	18.7401	-3.54025	0.00278619	0.0781736	-1.50913
Q5VYK3		PMA:SMES:AR02	-0.407049	14.7124	-3.53449	0.00282006	0.0781736	-1.52012
P00492	HPRT1	PMA:SMES:AR02	-0.435899	16.2414	-3.53415	0.00282204	0.0781736	-1.52075
P04040	CAT	PMA:SMES:AR02	-0.502785	19.7771	-3.53314	0.00282804	0.0781736	-1.52268
Q9NP72	RAB18	PMA:SMES:AR02	-0.467816	16.817	-3.53172	0.00283648	0.0781736	-1.52539
Q96DT5	DNAH11	PMA:SMES:AR02	-1.89994	17.6736	-3.52773	0.00286026	0.0781736	-1.53297
Q8IVW4	CDKL3	PMA:SMES:AR02	1.69632	13.1868	3.52083	0.00290193	0.0781736	-1.54611
Q8TBC3	SHKBP1	PMA:SMES:AR02	-0.507463	13.0044	-3.52072	0.0029026	0.0781736	-1.54632
Q9H0H3	KLHL25	PMA:SMES:AR02	-0.767549	13.013	-3.51996	0.00290724	0.0781736	-1.54777
O94910	ADGRL1	PMA:SMES:AR02	-2.11638	11.3692	-3.51958	0.00290959	0.0781736	-1.54851
Q8IXI1	RHOT2	PMA:SMES:AR02	-0.417305	15.1489	-3.51957	0.00290965	0.0781736	-1.54853
Q8WUA7	TBC1D22A	PMA:SMES:AR02	-0.446076	13.0463	-3.5136	0.00294625	0.0786866	-1.55988
P48595	SERPINB10	PMA:SMES:AR02	-0.558026	17.3495	-3.51177	0.0029576	0.0786866	-1.56338
P43378	PTPN9	PMA:SMES:AR02	-0.557916	12.7403	-3.50656	0.00299005	0.0791638	-1.57329
Q15054	POLD3	PMA:SMES:AR02	-0.834749	16.2363	-3.50299	0.00301252	0.0791844	-1.58009
Q9Y2S2	CRYL1	PMA:SMES:AR02	-0.502664	12.8542	-3.49872	0.00303957	0.0791844	-1.58821
P52790	HK3	PMA:SMES:AR02	1.32856	12.6188	3.49785	0.00304516	0.0791844	-1.58988
Q9NRV9	HEBP1	PMA:SMES:AR02	-0.609555	13.5748	-3.49575	0.00305857	0.0791844	-1.59387
P31323	PRKAR2B	PMA:SMES:AR02	-0.655467	13.5379	-3.49397	0.00306998	0.0791844	-1.59725
Q8WVC6	DCAKD	PMA:SMES:AR02	-0.43999	15.3626	-3.49274	0.00307794	0.0791844	-1.5996
Q9UI08	EVL	PMA:SMES:AR02	-0.799685	12.9103	-3.48985	0.00309665	0.0792917	-1.60511
Q9UI12	ATP6V1H	PMA:SMES:AR02	-0.447647	15.2415	-3.48437	0.00313239	0.0798321	-1.61553
Q9NQC3	RTN4	PMA:SMES:AR02	-0.719717	18.0352	-3.47416	0.00320016	0.0803463	-1.63497
P08865	RPSA	PMA:SMES:AR02	-0.501939	15.9941	-3.47101	0.00322136	0.0803463	-1.64096
Q9NP97	DYNLRB1	PMA:SMES:AR02	-1.65267	12.0562	-3.47023	0.00322661	0.0803463	-1.64244
Q8ND24	RNF214	PMA:SMES:AR02	-0.544145	17.5993	-3.46953	0.00323131	0.0803463	-1.64376
Q9NQA3		PMA:SMES:AR02	-0.767792	12.4188	-3.46782	0.00324291	0.0803463	-1.64702
Q8NB37	GATD1	PMA:SMES:AR02	-1.26222	13.8128	-3.46052	0.00329293	0.0803463	-1.66092
Q99996	AKAP9	PMA:SMES:AR02	-1.34819	12.6653	-3.46009	0.00329585	0.0803463	-1.66172
O94905	ERLIN2	PMA:SMES:AR02	-0.52435	14.745	-3.45992	0.00329705	0.0803463	-1.66205
Q9UFG5	C19orf25	PMA:SMES:AR02	-2.48881	14.0987	-3.45739	0.00331459	0.0803463	-1.66687
P49795	RGS19	PMA:SMES:AR02	0.679533	16.0479	3.45718	0.00331601	0.0803463	-1.66726
Q5QJ74	TBCEL	PMA:SMES:AR02	-1.06131	11.3904	-3.45485	0.0033323	0.0803463	-1.6717
Q5SWX8	ODR4	PMA:SMES:AR02	-1.26172	10.5237	-3.44891	0.00337401	0.0803463	-1.683
Q9NR12	PDLIM7	PMA:SMES:AR02	-0.562395	16.1351	-3.44864	0.00337589	0.0803463	-1.6835
Q6P4A8	PLBD1	PMA:SMES:AR02	-0.832999	16.8672	-3.44792	0.00338098	0.0803463	-1.68487
O43808	SLC25A17	PMA:SMES:AR02	-1.45657	11.0743	-3.44551	0.0033981	0.0803463	-1.68946
Q9H0Z9	RBM38	PMA:SMES:AR02	1.80099	15.8094	3.44357	0.00341196	0.0803463	-1.69315
Q9Y584	TIMM22	PMA:SMES:AR02	-0.474248	11.8805	-3.44347	0.00341267	0.0803463	-1.69334
P36222	CHI3L1	PMA:SMES:AR02	-0.507629	16.5487	-3.44276	0.00341774	0.0803463	-1.69469
O60234	GMFG	PMA:SMES:AR02	1.07282	17.1337	3.4382	0.00345054	0.0807693	-1.70336
O94766	B3GAT3	PMA:SMES:AR02	-0.731769	11.1951	-3.42818	0.00352379	0.0821313	-1.72242
P09668	CTSH	PMA:SMES:AR02	-0.63349	12.6535	-3.42036	0.00358195	0.082991	-1.73728
P54802	NAGLU	PMA:SMES:AR02	-0.603251	11.6335	-3.41843	0.00359648	0.082991	-1.74096
Q53FA7	TP53I3	PMA:SMES:AR02	-0.415155	14.9999	-3.41677	0.00360898	0.082991	-1.7441
Q9HCK5	AGO4	PMA:SMES:AR02	-0.339196	14.2669	-3.41288	0.00363852	0.082991	-1.7515
P31150	GDI1	PMA:SMES:AR02	-0.390832	18.0577	-3.41202	0.00364509	0.082991	-1.75314
P60660	MYL6	PMA:SMES:AR02	-0.528522	19.1915	-3.40946	0.00366472	0.082991	-1.75801
Q96Q05	TRAPPC9	PMA:SMES:AR02	-0.429141	14.4814	-3.40914	0.00366719	0.082991	-1.75862
Q8TEX9	IPO4	PMA:SMES:AR02	-0.415017	14.2995	-3.40343	0.00371125	0.0830936	-1.76946
Q06546	GABPA	PMA:SMES:AR02	0.709917	12.69	3.40328	0.0037124	0.0830936	-1.76974
Q12906	ILF3	PMA:SMES:AR02	-0.356071	16.0695	-3.40264	0.00371743	0.0830936	-1.77097
Q13393	PLD1	PMA:SMES:AR02	-0.470318	13.9234	-3.39591	0.00377015	0.0837704	-1.78375
Q13435	SF3B2	PMA:SMES:AR02	-0.459004	15.2872	-3.39487	0.00377842	0.0837704	-1.78574
Q9Y2K2	SIK3	PMA:SMES:AR02	-1.11637	12.3705	-3.39275	0.00379525	0.0838028	-1.78977
P16520	GNB3	PMA:SMES:AR02	1.81333	14.4513	3.38992	0.00381777	0.0839601	-1.79513
O00757	FBP2	PMA:SMES:AR02	-0.606677	14.4154	-3.38602	0.00384908	0.0840842	-1.80255
Q96NY7	CLIC6	PMA:SMES:AR02	-2.58328	12.0246	-3.38538	0.00385425	0.0840842	-1.80376
P06733	ENO1	PMA:SMES:AR02	-0.550649	19.6454	-3.38205	0.00388118	0.0843265	-1.81008
P30153	PPP2R1A	PMA:SMES:AR02	-0.468694	16.635	-3.38001	0.00389784	0.0843265	-1.81396
Q14643	ITPR1	PMA:SMES:AR02	-0.451198	16.1667	-3.37653	0.00392636	0.0843265	-1.82058
Q96HN2	AHCYL2	PMA:SMES:AR02	-0.589859	14.096	-3.37416	0.00394586	0.0843265	-1.82507
P78406	RAE1	PMA:SMES:AR02	-0.387325	13.398	-3.3713	0.00396959	0.0843265	-1.83051
Q9Y2V2	CARHSP1	PMA:SMES:AR02	0.595441	14.8756	3.37095	0.00397243	0.0843265	-1.83116
Q12851	MAP4K2	PMA:SMES:AR02	-0.53354	12.4647	-3.37082	0.00397358	0.0843265	-1.83142
Q9NZL9	MAT2B	PMA:SMES:AR02	-0.395511	16.3079	-3.36823	0.00399513	0.0844382	-1.83632
P08559	PDHA1	PMA:SMES:AR02	-0.337386	15.016	-3.36648	0.00400981	0.0844382	-1.83965
Q7L5N1	COPS6	PMA:SMES:AR02	-0.351506	13.5457	-3.36206	0.0040471	0.0848957	-1.84805
O60229	KALRN	PMA:SMES:AR02	1.09641	10.3255	3.35677	0.0040922	0.0855129	-1.8581
O43464	HTRA2	PMA:SMES:AR02	-0.664956	13.3568	-3.3516	0.0041367	0.0861128	-1.8679
P04839	CYBB	PMA:SMES:AR02	-0.403236	19.4768	-3.34914	0.00415807	0.0862285	-1.87257
Q13636	RAB31	PMA:SMES:AR02	-0.672707	17.2063	-3.34389	0.00420394	0.0866326	-1.88252
Q9C0B7	TANGO6	PMA:SMES:AR02	-1.22681	9.80157	-3.34246	0.00421658	0.0866326	-1.88524
Q92574	TSC1	PMA:SMES:AR02	-0.516859	11.9096	-3.34148	0.00422521	0.0866326	-1.8871
P06703	S100A6	PMA:SMES:AR02	0.475694	18.5678	3.33824	0.00425402	0.0868967	-1.89326
Q9NZD8	SPG21	PMA:SMES:AR02	-0.408852	14.4682	-3.33569	0.00427677	0.0870355	-1.89809
Q68CZ6	HAUS3	PMA:SMES:AR02	-1.12714	10.203	-3.33193	0.00431049	0.0871826	-1.90521
P62333	PSMC6	PMA:SMES:AR02	-0.45409	15.2335	-3.33133	0.00431597	0.0871826	-1.90636
Q96AY2	EME1	PMA:SMES:AR02	-1.59113	13.6049	-3.32872	0.00433962	0.0873368	-1.91132
O60684	KPNA6	PMA:SMES:AR02	-0.537117	13.9377	-3.32258	0.00439567	0.0881397	-1.92295
P20138	CD33	PMA:SMES:AR02	-1.05418	12.6206	-3.31563	0.00446009	0.0884274	-1.93613
P49327	FASN	PMA:SMES:AR02	-0.308351	17.499	-3.31419	0.00447349	0.0884274	-1.93885
Q9NRP0	OSTC	PMA:SMES:AR02	-0.49088	13.8445	-3.31283	0.00448629	0.0884274	-1.94144
Q9HB90	RRAGC	PMA:SMES:AR02	-0.511689	15.1168	-3.31139	0.00449984	0.0884274	-1.94417
O60488	ACSL4	PMA:SMES:AR02	-0.521293	13.907	-3.31114	0.00450219	0.0884274	-1.94465
O14802	POLR3A	PMA:SMES:AR02	1.76034	18.2596	3.31059	0.0045073	0.0884274	-1.94568
Q9BQ67	GRWD1	PMA:SMES:AR02	-0.698829	11.065	-3.30782	0.00453355	0.0886235	-1.95094
P00491	PNP	PMA:SMES:AR02	-0.452998	18.9452	-3.30603	0.00455053	0.0886378	-1.95433
Q6F5E8	CARMIL2	PMA:SMES:AR02	1.53759	14.3375	3.30312	0.00457831	0.0888616	-1.95984
Q9BXS5	AP1M1	PMA:SMES:AR02	-0.4721	16.1387	-3.299	0.00461798	0.0892704	-1.96766
Q2TB10	ZNF800	PMA:SMES:AR02	-0.742529	14.9748	-3.29753	0.00463211	0.0892704	-1.97043
P24844	MYL9	PMA:SMES:AR02	0.511864	13.8838	3.29452	0.00466141	0.0892815	-1.97614
P49773	HINT1	PMA:SMES:AR02	-0.853966	15.796	-3.29321	0.00467418	0.0892815	-1.97862
P14868	DARS1	PMA:SMES:AR02	-0.368721	16.3997	-3.29221	0.00468399	0.0892815	-1.98052
Q92530	PSMF1	PMA:SMES:AR02	-0.495768	15.1197	-3.29076	0.00469817	0.0892815	-1.98325
Q9UPM8	AP4E1	PMA:SMES:AR02	-0.610216	11.0625	-3.28833	0.00472213	0.0893806	-1.98786
Q96GK7	FAHD2A	PMA:SMES:AR02	-0.539601	13.0513	-3.28666	0.00473864	0.0893806	-1.99102
Q96T76	MMS19	PMA:SMES:AR02	-0.412435	12.3119	-3.28513	0.00475382	0.0893806	-1.99392
Q8IUC8	GALNT13	PMA:SMES:AR02	1.09279	13.257	3.28194	0.00478562	0.0893806	-1.99996
Q6ZWT7	MBOAT2	PMA:SMES:AR02	-0.487971	13.9616	-3.28084	0.00479664	0.0893806	-2.00204
Q9UBL6	CPNE7	PMA:SMES:AR02	-1.45284	10.5611	-3.28034	0.00480171	0.0893806	-2.003
P14406	COX7A2	PMA:SMES:AR02	1.85655	15.3356	3.27561	0.00484939	0.0899611	-2.01195
Q8N4C8	MINK1	PMA:SMES:AR02	-0.515554	13.0822	-3.27342	0.00487168	0.0900682	-2.0161
P18084	ITGB5	PMA:SMES:AR02	-0.574904	18.9562	-3.26759	0.00493137	0.0908638	-2.02713
Q9BYW2	SETD2	PMA:SMES:AR02	-2.31893	12.2601	-3.26342	0.00497451	0.09135	-2.03502
Q86VX2	COMMD7	PMA:SMES:AR02	-0.526861	14.5806	-3.26031	0.00500701	0.0916383	-2.04091
Q9H0R4	HDHD2	PMA:SMES:AR02	-0.430587	15.0382	-3.25272	0.00508699	0.0924002	-2.05526
Q99877	H2BC15	PMA:SMES:AR02	-1.82209	16.7093	-3.25171	0.00509777	0.0924002	-2.05718
Q8NCN5	PDPR	PMA:SMES:AR02	-0.420527	13.4613	-3.25155	0.00509946	0.0924002	-2.05748
Q5RKV6	EXOSC6	PMA:SMES:AR02	-0.561409	13.2419	-3.24888	0.00512802	0.0926099	-2.06253
P63244	RACK1	PMA:SMES:AR02	-0.460671	16.1035	-3.24145	0.00520821	0.0930848	-2.07658
Q9Y696	CLIC4	PMA:SMES:AR02	-1.41065	11.5191	-3.24089	0.0052143	0.0930848	-2.07764
Q6UWP2	DHRS11	PMA:SMES:AR02	-0.938864	11.0992	-3.2399	0.00522516	0.0930848	-2.07952
Q8WWN8	ARAP3	PMA:SMES:AR02	-0.48177	12.2894	-3.23877	0.00523748	0.0930848	-2.08165
O60603	TLR2	PMA:SMES:AR02	-0.376767	14.3398	-3.23731	0.00525342	0.0930848	-2.0844
P0CG04		PMA:SMES:AR02	-1.29367	12.1986	-3.23684	0.00525857	0.0930848	-2.08529
P34059	GALNS	PMA:SMES:AR02	-0.417893	15.5362	-3.23546	0.00527378	0.0930848	-2.0879
P16455		PMA:SMES:AR02	-1.12697	10.9397	-3.22856	0.00535033	0.0938373	-2.10095
P08579	SNRPB2	PMA:SMES:AR02	-0.874752	14.3853	-3.22715	0.00536612	0.0938373	-2.10361
O14727	APAF1	PMA:SMES:AR02	-0.385371	15.3266	-3.22612	0.00537767	0.0938373	-2.10556
Q13561	DCTN2	PMA:SMES:AR02	-0.39116	16.0479	-3.22545	0.00538524	0.0938373	-2.10683
Q92538	GBF1	PMA:SMES:AR02	-0.451853	12.8779	-3.22355	0.0054066	0.0938815	-2.11041
Q96BY9	SARAF	PMA:SMES:AR02	-0.68644	12.0886	-3.22217	0.0054222	0.0938815	-2.11302
Q14653	IRF3	PMA:SMES:AR02	-0.398115	13.5064	-3.21581	0.00549464	0.0948347	-2.12503
P45984	MAPK9	PMA:SMES:AR02	-0.549866	12.8402	-3.20977	0.00556441	0.0956498	-2.13644
Q15907	RAB11B	PMA:SMES:AR02	0.597049	18.1122	3.20801	0.0055849	0.0956498	-2.13977
Q9UMS0	NFU1	PMA:SMES:AR02	-0.419776	12.2064	-3.20648	0.00560271	0.0956498	-2.14265
P50851	LRBA	PMA:SMES:AR02	-0.394666	12.7781	-3.20569	0.00561201	0.0956498	-2.14415
Q99685	MGLL	PMA:SMES:AR02	-0.481916	15.2872	-3.20332	0.00563986	0.0958249	-2.14862
Q8IVW6	ARID3B	PMA:SMES:AR02	-0.531474	12.9551	-3.19681	0.005717	0.0967776	-2.16091
Q15067	ACOX1	PMA:SMES:AR02	-0.420589	14.3592	-3.19311	0.0057613	0.0967776	-2.16789
O14617	AP3D1	PMA:SMES:AR02	-0.342217	14.6294	-3.19278	0.00576525	0.0967776	-2.16851
Q86WG5	SBF2	PMA:SMES:AR02	-0.78791	12.5264	-3.19099	0.00578687	0.0967776	-2.1719
Q8WTS1	ABHD5	PMA:SMES:AR02	-0.64525	12.6982	-3.19033	0.00579483	0.0967776	-2.17314
Q96BW5	PTER	PMA:SMES:AR02	-0.619306	13.0103	-3.1897	0.0058024	0.0967776	-2.17432
P62318	SNRPD3	PMA:SMES:AR02	0.988669	16.6159	3.18818	0.00582087	0.0967897	-2.17719
Q9Y2I7	PIKFYVE	PMA:SMES:AR02	-0.450721	12.3447	-3.18545	0.00585405	0.0969626	-2.18233
P30838	ALDH3A1	PMA:SMES:AR02	-0.805927	13.8726	-3.18441	0.00586682	0.0969626	-2.1843
P10515	DLAT	PMA:SMES:AR02	-0.331426	13.9071	-3.17749	0.00595213	0.0980753	-2.19735
O75569	PRKRA	PMA:SMES:AR02	-0.665814	12.0385	-3.17511	0.00598177	0.0981854	-2.20184
Q9NVH2	INTS7	PMA:SMES:AR02	-0.415518	11.9937	-3.17406	0.00599482	0.0981854	-2.20382
Q96DV4	MRPL38	PMA:SMES:AR02	-0.953203	10.8974	-3.17052	0.00603924	0.0984114	-2.21049
O75030	MITF	PMA:SMES:AR02	-0.851805	14.3634	-3.17009	0.00604471	0.0984114	-2.21131
P43353	ALDH3B1	PMA:SMES:AR02	-0.434315	16.7343	-3.16339	0.00612975	0.0990386	-2.22393
P13637	ATP1A3	PMA:SMES:AR02	-0.563728	14.9823	-3.16288	0.00613621	0.0990386	-2.22488
A2A3N6		PMA:SMES:AR02	1.55459	13.2724	3.16139	0.00615528	0.0990386	-2.22769
P04181	OAT	PMA:SMES:AR02	-0.502993	16.7502	-3.16119	0.00615781	0.0990386	-2.22806
O75419	CDC45	PMA:SMES:AR02	-1.64308	13.3708	-3.15903	0.00618569	0.0990386	-2.23214
O15372	EIF3H	PMA:SMES:AR02	-0.380396	14.1232	-3.15852	0.00619218	0.0990386	-2.23309
Q9Y678	COPG1	PMA:SMES:AR02	-0.436018	15.3031	-3.15492	0.00623887	0.0990614	-2.23988
P20160	AZU1	PMA:SMES:AR02	0.927688	21.2636	3.15436	0.00624612	0.0990614	-2.24093
Q99614	TTC1	PMA:SMES:AR02	-0.462564	14.2334	-3.15421	0.0062481	0.0990614	-2.24121
P51692	STAT5B	PMA:SMES:AR02	-0.370518	15.7325	-3.15146	0.00628402	0.0990969	-2.24639
Q9NTK5	OLA1	PMA:SMES:AR02	-0.30818	15.4659	-3.15035	0.00629864	0.0990969	-2.24849
P29144	TPP2	PMA:SMES:AR02	-0.309264	15.5596	-3.14973	0.00630679	0.0990969	-2.24966
Q86V88	MDP1	PMA:SMES:AR02	-0.567096	14.3913	-3.14785	0.00633143	0.0990969	-2.25319
O14896	IRF6	PMA:SMES:AR02	2.1044	15.2411	3.14689	0.00634417	0.0990969	-2.255
Q9HCK8	CHD8	PMA:SMES:AR02	-0.734172	11.6518	-3.14574	0.00635936	0.0990969	-2.25716
O60832	DKC1	PMA:SMES:AR02	-0.395648	14.9109	-3.14384	0.00638457	0.0992064	-2.26074
Q9UL25	RAB21	PMA:SMES:AR02	-0.558403	17.0587	-3.14195	0.00640981	0.0993157	-2.2643
P68363	TUBA1B	PMA:SMES:AR02	-0.580277	18.8432	-3.13637	0.00648478	0.0993531	-2.27481
P34949	MPI	PMA:SMES:AR02	-0.441301	14.5171	-3.13589	0.00649122	0.0993531	-2.2757
Q13573	SNW1	PMA:SMES:AR02	-0.438397	13.2068	-3.13452	0.00650973	0.0993531	-2.27827
Q99447	PCYT2	PMA:SMES:AR02	-0.529835	13.0941	-3.13348	0.00652386	0.0993531	-2.28023
P56192	MARS1	PMA:SMES:AR02	-0.592591	16.8768	-3.13203	0.00654366	0.0993531	-2.28297
Q9NVJ2	ARL8B	PMA:SMES:AR02	-0.558927	17.6548	-3.13136	0.00655278	0.0993531	-2.28423
P36873	PPP1CC	PMA:SMES:AR02	-0.343854	16.7879	-3.13111	0.00655618	0.0993531	-2.28469
P62081	RPS7	PMA:SMES:AR02	0.834491	16.3903	3.12989	0.00657284	0.0993531	-2.28699
P29558	RBMS1	PMA:SMES:AR02	-0.885462	11.7825	-3.12965	0.00657618	0.0993531	-2.28745
Q7RTV0	PHF5A	PMA:SMES:AR02	-0.462067	12.9069	-3.12701	0.00661237	0.0995464	-2.2924
P27708	CAD	PMA:SMES:AR02	-0.2858	15.1317	-3.12367	0.00665856	0.0995464	-2.29869
Q15370	ELOB	PMA:SMES:AR02	-0.469552	15.1969	-3.12353	0.00666049	0.0995464	-2.29895
P10153	RNASE2	PMA:SMES:AR02	-0.596833	19.4486	-3.12342	0.00666198	0.0995464	-2.29915
A0AV96	RBM47	PMA:SMES:AR02	-0.461469	12.9314	-3.12038	0.00670435	0.0999058	-2.30488
O15117	FYB1	PMA:SMES:AR02	-0.508983	14.5819	-3.11674	0.00675531	0.100391	-2.31171
O15228	GNPAT	PMA:SMES:AR02	-0.5554	12.6066	-3.11543	0.00677377	0.100392	-2.31418
Q9ULV0	MYO5B	PMA:SMES:AR02	-1.1165	13.6029	-3.11373	0.00679772	0.100474	-2.31736
Q9BRR6	ADPGK	PMA:SMES:AR02	-0.350543	15.1703	-3.11057	0.00684259	0.100718	-2.3233
P21281	ATP6V1B2	PMA:SMES:AR02	-0.386806	17.0989	-3.10997	0.00685119	0.100718	-2.32444
Q7Z6J8	UBE3D	PMA:SMES:AR02	0.54779	13.7444	3.10735	0.0068886	0.100996	-2.32935
O15305	PMM2	PMA:SMES:AR02	-0.446895	13.4642	-3.10544	0.00691608	0.101127	-2.33294
Q5SW96	LDLRAP1	PMA:SMES:AR02	-0.865952	10.2412	-3.10378	0.00693999	0.101205	-2.33606
Q8TCU6	PREX1	PMA:SMES:AR02	-0.445948	14.7813	-3.10116	0.00697795	0.101487	-2.34098
Q8NBS9	TXNDC5	PMA:SMES:AR02	-0.395747	14.1702	-3.09633	0.00704839	0.102239	-2.35005
Q9UNN5	FAF1	PMA:SMES:AR02	-0.574857	13.0216	-3.09201	0.00711202	0.102888	-2.35816
Q9BYM8	RBCK1	PMA:SMES:AR02	-0.389278	12.7434	-3.08685	0.00718879	0.103165	-2.36785
P62277	RPS13	PMA:SMES:AR02	0.430567	16.5649	3.08465	0.00722173	0.103165	-2.37197
Q9Y484	WDR45	PMA:SMES:AR02	-0.571696	12.3757	-3.08408	0.00723028	0.103165	-2.37304
P50570	DNM2	PMA:SMES:AR02	-0.410932	17.1564	-3.08281	0.00724943	0.103165	-2.37542
Q7L5D6	GET4	PMA:SMES:AR02	-0.631967	12.5318	-3.08134	0.00727165	0.103165	-2.37818
O94826	TOMM70	PMA:SMES:AR02	-0.450611	13.3775	-3.07961	0.00729783	0.103165	-2.38143
Q9BSH4	TACO1	PMA:SMES:AR02	-0.955163	10.6148	-3.07872	0.0073113	0.103165	-2.38309
Q9HC38	GLOD4	PMA:SMES:AR02	-0.350706	14.8006	-3.07795	0.00732307	0.103165	-2.38454
Q9HCD5	NCOA5	PMA:SMES:AR02	-0.595476	12.3372	-3.07744	0.00733086	0.103165	-2.3855
Q5VU43	PDE4DIP	PMA:SMES:AR02	-0.931171	11.6828	-3.07703	0.00733702	0.103165	-2.38626
O43747	AP1G1	PMA:SMES:AR02	-0.265587	16.0759	-3.07538	0.00736229	0.103165	-2.38936
Q969M3	YIPF5	PMA:SMES:AR02	-0.554313	13.9199	-3.0749	0.00736968	0.103165	-2.39026
P30154	PPP2R1B	PMA:SMES:AR02	-0.486028	12.2699	-3.07442	0.00737701	0.103165	-2.39116
Q9NUW8	TDP1	PMA:SMES:AR02	-1.01563	11.2499	-3.07245	0.00740724	0.103322	-2.39485
Q96KQ4	PPP1R13B	PMA:SMES:AR02	-1.10453	14.6161	-3.07081	0.00743262	0.103326	-2.39793
Q14573	ITPR3	PMA:SMES:AR02	-0.410725	16.0569	-3.06998	0.00744541	0.103326	-2.39948
P50416	CPT1A	PMA:SMES:AR02	-0.416477	14.0723	-3.06806	0.00747515	0.103476	-2.40308
P53621	COPA	PMA:SMES:AR02	-0.275692	15.5622	-3.06533	0.00751769	0.1037	-2.4082
O43681	GET3	PMA:SMES:AR02	-0.372431	16.064	-3.06413	0.00753645	0.1037	-2.41044
P23743	DGKA	PMA:SMES:AR02	-0.409947	15.2232	-3.06337	0.00754836	0.1037	-2.41187
P26640	VARS1	PMA:SMES:AR02	-0.290815	14.9164	-3.06176	0.00757364	0.103785	-2.41488
Q9UQC2	GAB2	PMA:SMES:AR02	-0.860368	10.9016	-3.0588	0.00762038	0.10411	-2.42043
Q9H7D0	DOCK5	PMA:SMES:AR02	-0.280965	15.4101	-3.05785	0.00763551	0.10411	-2.42222
Q6PJT7	ZC3H14	PMA:SMES:AR02	-0.422619	12.3295	-3.05538	0.00767476	0.104298	-2.42684
P55160	NCKAP1L	PMA:SMES:AR02	-0.290212	15.8937	-3.05458	0.00768755	0.104298	-2.42834
Q9Y2Q3	GSTK1	PMA:SMES:AR02	-0.435407	14.6506	-3.05262	0.00771882	0.104463	-2.432
O15541	RNF113A	PMA:SMES:AR02	0.825709	10.7181	3.04847	0.00778572	0.105107	-2.43978
P42694	HELZ	PMA:SMES:AR02	-1.47309	12.6899	-3.0439	0.00785993	0.105847	-2.44833
P08236	GUSB	PMA:SMES:AR02	-0.421443	15.6678	-3.03906	0.00793928	0.106595	-2.45738
O00391	QSOX1	PMA:SMES:AR02	-0.386866	16.6687	-3.03772	0.00796138	0.106595	-2.45989
Q86UT6	NLRX1	PMA:SMES:AR02	-0.379272	13.4848	-3.03617	0.00798713	0.106595	-2.4628
O14874	BCKDK	PMA:SMES:AR02	-0.941934	10.0097	-3.03577	0.00799364	0.106595	-2.46353
Q14005	IL16	PMA:SMES:AR02	-0.392813	16.9975	-3.03332	0.00803449	0.106878	-2.46812
Q9UPU5	USP24	PMA:SMES:AR02	-0.361384	13.5381	-3.02993	0.00809121	0.107196	-2.47446
Q9H3H3	C11orf68	PMA:SMES:AR02	-0.640278	14.0753	-3.02814	0.00812121	0.107196	-2.4778
Q13795	ARFRP1	PMA:SMES:AR02	-0.599125	10.8148	-3.02631	0.00815219	0.107196	-2.48123
P61966	AP1S1	PMA:SMES:AR02	0.753818	12.1131	3.02354	0.00819921	0.107196	-2.48641
O60568	PLOD3	PMA:SMES:AR02	-0.4774	16.0309	-3.02322	0.00820452	0.107196	-2.48699
P39656	DDOST	PMA:SMES:AR02	-0.487624	16.5441	-3.02264	0.00821453	0.107196	-2.48809
Q13363	CTBP1	PMA:SMES:AR02	-0.311209	15.2974	-3.02207	0.00822421	0.107196	-2.48915
Q15286	RAB35	PMA:SMES:AR02	-0.560132	16.3241	-3.02013	0.00825742	0.107196	-2.49278
Q969V3	NCLN	PMA:SMES:AR02	-0.444393	13.7102	-3.01924	0.00827255	0.107196	-2.49443
Q96J02	ITCH	PMA:SMES:AR02	-0.387769	11.9936	-3.0175	0.0083026	0.107196	-2.49769
Q9NUQ8	ABCF3	PMA:SMES:AR02	-0.349797	14.2753	-3.01459	0.00835276	0.107196	-2.50312
P08311	CTSG	PMA:SMES:AR02	0.582376	20.9575	3.01287	0.00838272	0.107196	-2.50634
Q68E01	INTS3	PMA:SMES:AR02	-0.45989	13.1449	-3.01069	0.00842064	0.107196	-2.51041
Q04727	TLE4	PMA:SMES:AR02	-0.624279	13.7208	-3.01023	0.00842867	0.107196	-2.51127
Q9Y4H4	GPSM3	PMA:SMES:AR02	-0.689576	15.8319	-3.00991	0.00843417	0.107196	-2.51185
Q86V48	LUZP1	PMA:SMES:AR02	-0.835484	11.4113	-3.00725	0.0084809	0.107196	-2.51683
Q7Z6Z7	HUWE1	PMA:SMES:AR02	-0.354144	14.7413	-3.00676	0.00848943	0.107196	-2.51773
O15254	ACOX3	PMA:SMES:AR02	-0.635666	15.0296	-3.0046	0.00852756	0.107196	-2.52177
Q8N573	OXR1	PMA:SMES:AR02	-0.413372	12.7294	-3.00432	0.00853255	0.107196	-2.52229
P28907	CD38	PMA:SMES:AR02	-0.866969	11.3543	-3.00424	0.00853393	0.107196	-2.52244
Q6PCB5	RSBN1L	PMA:SMES:AR02	-1.0241	14.3669	-3.00379	0.00854195	0.107196	-2.52329
Q15046	KARS1	PMA:SMES:AR02	-0.369226	15.267	-3.00288	0.00855814	0.107196	-2.52499
Q8N163	CCAR2	PMA:SMES:AR02	-0.306567	14.4216	-3.00199	0.00857393	0.107196	-2.52665
A5YKK6	CNOT1	PMA:SMES:AR02	-0.350991	14.19	-3.00168	0.00857944	0.107196	-2.52723
O75330	HMMR	PMA:SMES:AR02	-0.82848	11.746	-3.00114	0.00858904	0.107196	-2.52823
Q86SX6	GLRX5	PMA:SMES:AR02	-1.04406	10.9311	-3.0009	0.00859321	0.107196	-2.52867
Q9H269	VPS16	PMA:SMES:AR02	-0.344081	14.3134	-2.99818	0.00864185	0.107196	-2.53375
O15400	STX7	PMA:SMES:AR02	-0.527823	15.9163	-2.99807	0.00864379	0.107196	-2.53396
Q92556	ELMO1	PMA:SMES:AR02	-0.341263	15.9871	-2.99756	0.008653	0.107196	-2.53491
O43583	DENR	PMA:SMES:AR02	1.08358	13.6425	2.99614	0.00867846	0.107196	-2.53756
P11413	G6PD	PMA:SMES:AR02	-0.376624	19.4463	-2.9938	0.0087207	0.107196	-2.54193
P50749	RASSF2	PMA:SMES:AR02	-0.467263	16.1815	-2.99364	0.00872354	0.107196	-2.54222
Q6ICL3	TANGO2	PMA:SMES:AR02	-1.08077	13.3092	-2.99307	0.00873378	0.107196	-2.54328
Q8N884	CGAS	PMA:SMES:AR02	-0.757263	12.2409	-2.99278	0.00873902	0.107196	-2.54382
P55212	CASP6	PMA:SMES:AR02	-0.408605	13.1922	-2.99163	0.00875994	0.107196	-2.54597
Q9H992	MARCHF7	PMA:SMES:AR02	-1.33818	12.2218	-2.99009	0.00878799	0.107196	-2.54885
P48443	RXRG	PMA:SMES:AR02	-0.918761	10.9988	-2.98926	0.00880303	0.107196	-2.55039
Q9H0U4	RAB1B	PMA:SMES:AR02	-0.696852	15.4277	-2.98914	0.00880525	0.107196	-2.55061
Q5SRE5	NUP188	PMA:SMES:AR02	-0.342286	16.0242	-2.98655	0.00885255	0.107532	-2.55543
P31040	SDHA	PMA:SMES:AR02	-0.486486	13.8428	-2.98464	0.00888776	0.10772	-2.559
P30084	ECHS1	PMA:SMES:AR02	-0.457965	14.2134	-2.97867	0.00899833	0.108818	-2.57013
Q9NZB2	FAM120A	PMA:SMES:AR02	-0.318821	14.4209	-2.97643	0.00904007	0.109081	-2.57429
O14841	OPLAH	PMA:SMES:AR02	-0.417051	12.8613	-2.97513	0.00906441	0.109133	-2.57671
P36542	ATP5F1C	PMA:SMES:AR02	-0.575849	16.5682	-2.96974	0.00916622	0.109994	-2.58676
Q96K76	USP47	PMA:SMES:AR02	-0.295418	13.8815	-2.96764	0.00920616	0.109994	-2.59067
O14773	TPP1	PMA:SMES:AR02	-0.526807	16.5792	-2.96756	0.00920755	0.109994	-2.59081
O14734	ACOT8	PMA:SMES:AR02	-0.61564	14.6686	-2.96709	0.00921655	0.109994	-2.59168
Q9UBV8	PEF1	PMA:SMES:AR02	0.470508	14.1133	2.96265	0.00930169	0.110767	-2.59995
P49841	GSK3B	PMA:SMES:AR02	-0.432359	12.7071	-2.96097	0.009334	0.11091	-2.60307
Q8WU39	MZB1	PMA:SMES:AR02	-0.84038	11.9593	-2.95881	0.00937586	0.111006	-2.60709
P20585	MSH3	PMA:SMES:AR02	-0.422425	15.0158	-2.9574	0.00940311	0.111006	-2.6097
Q8IWZ8	SUGP1	PMA:SMES:AR02	-0.569042	11.8298	-2.95634	0.00942389	0.111006	-2.61169
Q8NBJ7	SUMF2	PMA:SMES:AR02	-0.579667	12.1279	-2.95633	0.00942399	0.111006	-2.6117
Q8N2G8	GHDC	PMA:SMES:AR02	-0.69254	11.7685	-2.95532	0.00944383	0.111006	-2.61359
O95202	LETM1	PMA:SMES:AR02	-0.497125	13.2218	-2.95182	0.00951243	0.111337	-2.62009
Q68EM7	ARHGAP17	PMA:SMES:AR02	-0.508536	13.5619	-2.95179	0.00951288	0.111337	-2.62014
Q16881	TXNRD1	PMA:SMES:AR02	-0.412424	14.975	-2.94209	0.00970572	0.112997	-2.63818
Q96RL1	UIMC1	PMA:SMES:AR02	-0.659776	10.6867	-2.94143	0.00971885	0.112997	-2.63939
P42331	ARHGAP25	PMA:SMES:AR02	-0.399431	15.3618	-2.9392	0.00976383	0.112997	-2.64354
Q9NUJ1	ABHD10	PMA:SMES:AR02	-0.474502	13.6822	-2.93918	0.00976427	0.112997	-2.64358
O43765	SGTA	PMA:SMES:AR02	-0.366997	14.0731	-2.939	0.00976777	0.112997	-2.6439
Q6ZS81	WDFY4	PMA:SMES:AR02	-0.326759	13.6904	-2.93747	0.00979877	0.112997	-2.64675
P01011	SERPINA3	PMA:SMES:AR02	0.662123	13.7819	2.93716	0.00980502	0.112997	-2.64732
P61326	MAGOH	PMA:SMES:AR02	-0.47366	15.1904	-2.9364	0.00982039	0.112997	-2.64873
O43708	GSTZ1	PMA:SMES:AR02	-0.381936	12.9958	-2.93279	0.00989391	0.113189	-2.65543
Q92995	USP13	PMA:SMES:AR02	-1.1286	10.718	-2.93253	0.00989928	0.113189	-2.65592
Q13045	FLII	PMA:SMES:AR02	-0.304042	15.8629	-2.93253	0.00989935	0.113189	-2.65593
Q9NR31	SAR1A	PMA:SMES:AR02	-0.384156	16.1197	-2.93124	0.0099257	0.113253	-2.65831
O75530	EED	PMA:SMES:AR02	-0.41643	12.6236	-2.92931	0.00996535	0.113468	-2.6619
Q8IZP2		PMA:SMES:AR02	-0.544401	15.308	-2.92136	0.0101304	0.114874	-2.67665
P55084	HADHB	PMA:SMES:AR02	-0.371158	16.6329	-2.92133	0.0101309	0.114874	-2.6767
Q9Y3L3	SH3BP1	PMA:SMES:AR02	0.603788	13.1679	2.91976	0.0101639	0.11494	-2.67961
Q2PZI1	DPY19L1	PMA:SMES:AR02	-0.592018	12.5903	-2.91794	0.0102022	0.11494	-2.68299
P50750	CDK9	PMA:SMES:AR02	0.575214	18.0835	2.91712	0.0102193	0.11494	-2.6845
Q96D53	COQ8B	PMA:SMES:AR02	-0.719291	11.1145	-2.91704	0.0102211	0.11494	-2.68466
O00584	RNASET2	PMA:SMES:AR02	-0.402672	15.7421	-2.91533	0.0102572	0.115109	-2.68782
Q9NPB8	GPCPD1	PMA:SMES:AR02	-0.413519	13.7984	-2.91389	0.0102878	0.115215	-2.69049
Q9UKF6	CPSF3	PMA:SMES:AR02	-0.306419	16.5655	-2.90877	0.0103972	0.116201	-2.69999
P56377	AP1S2	PMA:SMES:AR02	0.660286	15.4138	2.90722	0.0104304	0.11622	-2.70285
P21796	VDAC1	PMA:SMES:AR02	-0.424278	15.2855	-2.9067	0.0104415	0.11622	-2.70381
Q9H0E2	TOLLIP	PMA:SMES:AR02	-0.562717	14.6858	-2.90535	0.0104708	0.116309	-2.70632
Q6PL18	ATAD2	PMA:SMES:AR02	-0.413101	15.4426	-2.90367	0.010507	0.116339	-2.70942
Q9NPY3	CD93	PMA:SMES:AR02	-0.978236	14.8726	-2.90325	0.0105162	0.116339	-2.7102
Q8IZQ5	SELENOH	PMA:SMES:AR02	0.842418	13.4721	2.90133	0.0105578	0.116387	-2.71376
P04075	ALDOA	PMA:SMES:AR02	-0.426237	18.9435	-2.90028	0.0105808	0.116387	-2.71571
O43660	PLRG1	PMA:SMES:AR02	-0.586781	11.6282	-2.89998	0.0105873	0.116387	-2.71626
Q9P2J5	LARS1	PMA:SMES:AR02	-0.310258	14.1004	-2.89913	0.0106058	0.116387	-2.71783
Q9BTX1	NDC1	PMA:SMES:AR02	-0.82795	11.7859	-2.89642	0.0106653	0.116617	-2.72285
Q9GZN8	ADISSP	PMA:SMES:AR02	-0.517125	14.9124	-2.89525	0.0106911	0.116617	-2.72501
P19793	RXRA	PMA:SMES:AR02	-0.400344	14.0709	-2.89497	0.0106972	0.116617	-2.72553
Q15120	PDK3	PMA:SMES:AR02	-0.3316	14.4508	-2.89421	0.0107141	0.116617	-2.72694
O60262	GNG7	PMA:SMES:AR02	-0.787017	11.9175	-2.89238	0.0107547	0.116617	-2.73033
Q86Y82	STX12	PMA:SMES:AR02	-0.445673	13.6912	-2.89011	0.010805	0.116617	-2.73452
O15111	CHUK	PMA:SMES:AR02	-0.40195	13.1654	-2.88991	0.0108095	0.116617	-2.7349
A6NMX2	EIF4E1B	PMA:SMES:AR02	-0.764951	11.361	-2.88861	0.0108385	0.116617	-2.7373
O14880	MGST3	PMA:SMES:AR02	-0.717414	13.4497	-2.88712	0.0108719	0.116617	-2.74006
Q9BY49	PECR	PMA:SMES:AR02	-0.603402	12.6953	-2.88685	0.0108779	0.116617	-2.74055
Q8N335	GPD1L	PMA:SMES:AR02	-0.456109	12.9517	-2.88683	0.0108784	0.116617	-2.74059
Q9H3G5	CPVL	PMA:SMES:AR02	-0.72172	12.569	-2.88642	0.0108875	0.116617	-2.74134
P16219	ACADS	PMA:SMES:AR02	-0.424183	13.7253	-2.88561	0.0109058	0.116617	-2.74285
Q9NTJ5	SACM1L	PMA:SMES:AR02	-0.324974	16.3693	-2.8841	0.0109398	0.116617	-2.74564
Q92729	PTPRU	PMA:SMES:AR02	-0.716269	15.5626	-2.88355	0.0109521	0.116617	-2.74665
Q12933	TRAF2	PMA:SMES:AR02	-0.63109	12.9291	-2.88279	0.0109694	0.116617	-2.74807
Q10570	CPSF1	PMA:SMES:AR02	-0.323902	13.6548	-2.88166	0.0109948	0.116617	-2.75014
Q8WUM0	NUP133	PMA:SMES:AR02	-0.537871	13.2187	-2.88092	0.0110117	0.116617	-2.75152
P54886	ALDH18A1	PMA:SMES:AR02	-0.499288	11.8649	-2.87295	0.0111939	0.117757	-2.76623
P00488	F13A1	PMA:SMES:AR02	-0.316902	15.4659	-2.8727	0.0111997	0.117757	-2.76671
O00754	MAN2B1	PMA:SMES:AR02	-0.456562	14.5441	-2.87239	0.0112069	0.117757	-2.76728
O94973	AP2A2	PMA:SMES:AR02	-0.385093	14.471	-2.87154	0.0112264	0.117757	-2.76883
P19388	POLR2E	PMA:SMES:AR02	-0.503083	11.7897	-2.8715	0.0112273	0.117757	-2.76891
Q16134	ETFDH	PMA:SMES:AR02	-0.411725	12.5154	-2.87001	0.0112619	0.117893	-2.77167
O95759	TBC1D8	PMA:SMES:AR02	-0.624753	10.8849	-2.86811	0.0113061	0.118034	-2.77518
Q9NZG7	NINJ2	PMA:SMES:AR02	-1.28932	10.447	-2.86757	0.0113187	0.118034	-2.77617
O95602	POLR1A	PMA:SMES:AR02	-0.633505	14.8599	-2.86417	0.0113982	0.118637	-2.78245
Q92622	RUBCN	PMA:SMES:AR02	-0.865057	9.63025	-2.86051	0.0114844	0.119307	-2.78921
Q8NF91	SYNE1	PMA:SMES:AR02	-0.367019	15.1505	-2.85909	0.011518	0.119344	-2.79182
O94903	PLPBP	PMA:SMES:AR02	-0.317583	14.9435	-2.85669	0.011575	0.119344	-2.79625
P50995	ANXA11	PMA:SMES:AR02	0.364878	18.0454	2.85593	0.011593	0.119344	-2.79764
Q9NQ48	LZTFL1	PMA:SMES:AR02	-0.520091	12.6376	-2.85545	0.0116044	0.119344	-2.79852
Q8WVM8	SCFD1	PMA:SMES:AR02	-0.488217	14.5106	-2.85487	0.0116185	0.119344	-2.79961
Q13488	TCIRG1	PMA:SMES:AR02	-0.351891	15.5807	-2.85483	0.0116193	0.119344	-2.79967
O43318	MAP3K7	PMA:SMES:AR02	-0.649071	12.5415	-2.85078	0.0117165	0.120117	-2.80714
Q9Y4P1	ATG4B	PMA:SMES:AR02	-0.522987	13.5095	-2.8495	0.0117474	0.120123	-2.8095
P51991	HNRNPA3	PMA:SMES:AR02	-0.354292	15.8709	-2.84785	0.0117873	0.120123	-2.81254
Q8N3F8	MICALL1	PMA:SMES:AR02	-0.714936	12.125	-2.84757	0.0117942	0.120123	-2.81306
Q5JUX0	SPIN3	PMA:SMES:AR02	-1.40235	10.9167	-2.84542	0.0118464	0.120123	-2.81701
P62136	PPP1CA	PMA:SMES:AR02	-0.481696	17.0066	-2.84494	0.0118581	0.120123	-2.8179
Q9NUQ9	CYRIB	PMA:SMES:AR02	-0.479553	18.135	-2.84487	0.0118598	0.120123	-2.81803
Q96Q15	SMG1	PMA:SMES:AR02	-0.471703	13.1253	-2.8444	0.0118713	0.120123	-2.8189
Q9NSE4	IARS2	PMA:SMES:AR02	-0.342744	13.3113	-2.84332	0.0118977	0.120167	-2.82089
Q8WXF0	SRSF12	PMA:SMES:AR02	0.878275	12.6052	2.84044	0.0119682	0.120656	-2.82618
P22695	UQCRC2	PMA:SMES:AR02	-0.542335	14.2166	-2.83821	0.0120233	0.120893	-2.8303
Q9UKX7	NUP50	PMA:SMES:AR02	-0.367447	14.7528	-2.83769	0.0120361	0.120893	-2.83124
Q75N03	CBLL1	PMA:SMES:AR02	0.872437	10.5497	2.83653	0.012065	0.120961	-2.8334
O75410	TACC1	PMA:SMES:AR02	-0.829877	11.658	-2.83298	0.0121531	0.12162	-2.83991
P05155	SERPING1	PMA:SMES:AR02	-0.50133	11.0621	-2.82909	0.0122507	0.122329	-2.84707
O95674	CDS2	PMA:SMES:AR02	-0.645045	12.9673	-2.82707	0.0123018	0.122329	-2.8508
Q96AT9	RPE	PMA:SMES:AR02	-1.06936	12.4022	-2.82555	0.0123401	0.122329	-2.85358
Q92797	SYMPK	PMA:SMES:AR02	-0.350522	12.6893	-2.82534	0.0123455	0.122329	-2.85397
O43504	LAMTOR5	PMA:SMES:AR02	-0.388049	15.7834	-2.82487	0.0123575	0.122329	-2.85484
O95210	STBD1	PMA:SMES:AR02	-0.484731	15.7516	-2.82483	0.0123585	0.122329	-2.85491
O95861	BPNT1	PMA:SMES:AR02	-0.419421	13.7566	-2.82203	0.0124298	0.122641	-2.86006
Q86U42	PABPN1	PMA:SMES:AR02	0.782203	12.1126	2.82182	0.012435	0.122641	-2.86044
P02771	AFP	PMA:SMES:AR02	1.52693	13.2521	2.82083	0.0124603	0.122669	-2.86226
P21912	SDHB	PMA:SMES:AR02	-0.55187	14.5043	-2.81642	0.0125738	0.123386	-2.87037
P39880	CUX1	PMA:SMES:AR02	-0.275307	14.9532	-2.81624	0.0125784	0.123386	-2.8707
Q13158	FADD	PMA:SMES:AR02	-0.649209	13.3428	-2.81475	0.0126169	0.123541	-2.87343
P54577	YARS1	PMA:SMES:AR02	-0.306614	14.541	-2.80956	0.0127521	0.12411	-2.88297
Q13496	MTM1	PMA:SMES:AR02	-0.388249	12.4287	-2.80828	0.0127854	0.12411	-2.88531
Q9H8X2	IPPK	PMA:SMES:AR02	1.48025	18.6642	2.80794	0.0127944	0.12411	-2.88593
Q9Y3D9	MRPS23	PMA:SMES:AR02	-0.537774	12.4696	-2.80738	0.0128092	0.12411	-2.88697
Q9GZT9	EGLN1	PMA:SMES:AR02	-0.528227	12.275	-2.80555	0.0128572	0.12411	-2.89032
Q7L8L6	FASTKD5	PMA:SMES:AR02	-1.05197	11.8747	-2.80451	0.0128847	0.12411	-2.89223
Q92598	HSPH1	PMA:SMES:AR02	-0.40827	17.698	-2.80289	0.0129277	0.12411	-2.89521
P62979	RPS27A	PMA:SMES:AR02	-0.842069	11.9299	-2.80267	0.0129334	0.12411	-2.8956
Q9NRZ7	AGPAT3	PMA:SMES:AR02	-0.613183	11.0312	-2.80262	0.0129347	0.12411	-2.89569
Q9NX74	DUS2	PMA:SMES:AR02	-0.847992	11.4841	-2.80247	0.0129389	0.12411	-2.89598
P35573	AGL	PMA:SMES:AR02	-0.323514	15.1468	-2.80194	0.0129529	0.12411	-2.89695
Q13277	STX3	PMA:SMES:AR02	0.55424	13.3813	2.80146	0.0129657	0.12411	-2.89783
Q9BWJ5	SF3B5	PMA:SMES:AR02	-0.693711	11.7692	-2.80126	0.0129708	0.12411	-2.89818
Q9NW64	RBM22	PMA:SMES:AR02	-0.664403	11.9518	-2.7977	0.0130659	0.124801	-2.90471
P07858	CTSB	PMA:SMES:AR02	-0.347673	14.4764	-2.79477	0.0131447	0.125334	-2.91009
Q8IY22	CMIP	PMA:SMES:AR02	-0.473258	12.6924	-2.79192	0.0132217	0.125712	-2.91532
Q6BCY4	CYB5R2	PMA:SMES:AR02	-1.03113	12.1323	-2.79127	0.0132392	0.125712	-2.9165
Q8TDQ7	GNPDA2	PMA:SMES:AR02	-0.557864	12.638	-2.79075	0.0132534	0.125712	-2.91746
P56556	NDUFA6	PMA:SMES:AR02	-0.545462	12.4254	-2.78964	0.0132836	0.125779	-2.91949
Q8IWZ3	ANKHD1	PMA:SMES:AR02	-0.408544	16.2736	-2.78635	0.0133734	0.126216	-2.92552
O43847	NRDC	PMA:SMES:AR02	-0.379456	13.1724	-2.78594	0.0133846	0.126216	-2.92626
Q6YP21	KYAT3	PMA:SMES:AR02	-0.512583	12.7732	-2.78422	0.013432	0.126216	-2.92942
Q02252	ALDH6A1	PMA:SMES:AR02	-0.338819	13.5857	-2.78385	0.0134421	0.126216	-2.9301
P30085	CMPK1	PMA:SMES:AR02	-0.404627	16.0995	-2.78275	0.0134725	0.126216	-2.93211
Q5JS37	NHLRC3	PMA:SMES:AR02	0.504038	12.8197	2.78245	0.0134808	0.126216	-2.93266
P03928	ATP8	PMA:SMES:AR02	-0.533711	12.4448	-2.78137	0.0135107	0.126216	-2.93464
Q9BUB5	MKNK1	PMA:SMES:AR02	-0.626274	11.0605	-2.78122	0.0135148	0.126216	-2.93492
Q9Y383	LUC7L2	PMA:SMES:AR02	-0.327473	14.6166	-2.77721	0.0136262	0.126702	-2.94225
Q8NI60	COQ8A	PMA:SMES:AR02	-0.452019	12.3418	-2.77714	0.0136282	0.126702	-2.94238
Q9H1Y0	ATG5	PMA:SMES:AR02	-0.385686	12.8276	-2.77684	0.0136366	0.126702	-2.94293
Q96AE4	FUBP1	PMA:SMES:AR02	-0.29801	15.6388	-2.77567	0.0136693	0.126789	-2.94507
Q06187	BTK	PMA:SMES:AR02	-0.319152	13.9079	-2.77234	0.0137627	0.127439	-2.95116
P05387	RPLP2	PMA:SMES:AR02	-0.333566	16.5558	-2.76972	0.0138367	0.12772	-2.95595
Q96A33	CCDC47	PMA:SMES:AR02	-0.634631	14.1202	-2.76961	0.0138398	0.12772	-2.95615
Q96JH7	VCPIP1	PMA:SMES:AR02	-0.440773	13.7309	-2.76709	0.0139115	0.128164	-2.96076
P22314	UBA1	PMA:SMES:AR02	-0.384595	17.0187	-2.7657	0.0139511	0.128312	-2.9633
O00267	SUPT5H	PMA:SMES:AR02	-0.404675	12.8323	-2.76481	0.0139764	0.128329	-2.96492
Q9UPS6		PMA:SMES:AR02	-0.98257	9.91292	-2.7595	0.014129	0.128509	-2.97462
A8MTJ3	GNAT3	PMA:SMES:AR02	1.0898	19.344	2.7592	0.0141378	0.128509	-2.97517
Q9Y263	PLAA	PMA:SMES:AR02	-0.413553	15.0459	-2.75918	0.0141384	0.128509	-2.97521
P30613	PKLR	PMA:SMES:AR02	0.649379	18.2483	2.7586	0.014155	0.128509	-2.97626
O00505	KPNA3	PMA:SMES:AR02	-0.387632	14.8087	-2.75792	0.0141748	0.128509	-2.97751
Q5H9R7	PPP6R3	PMA:SMES:AR02	-0.380774	13.1393	-2.75741	0.0141897	0.128509	-2.97845
P01834		PMA:SMES:AR02	-0.829565	13.8527	-2.75732	0.0141922	0.128509	-2.97861
P16435	POR	PMA:SMES:AR02	-0.446968	14.9527	-2.75715	0.0141971	0.128509	-2.97891
P07711	CTSL	PMA:SMES:AR02	-0.896218	10.5002	-2.75618	0.0142254	0.128509	-2.98069
Q14141	SEPTIN6	PMA:SMES:AR02	-0.988083	15.6015	-2.75597	0.0142316	0.128509	-2.98108
Q92696	RABGGTA	PMA:SMES:AR02	-0.263049	13.0936	-2.75147	0.0143629	0.129464	-2.98928
Q96M96	FGD4	PMA:SMES:AR02	-0.559897	17.2747	-2.75072	0.0143849	0.129464	-2.99065
Q9Y2Q0	ATP8A1	PMA:SMES:AR02	-0.32814	14.9982	-2.74858	0.0144482	0.12982	-2.99457
Q5GLZ8	HERC4	PMA:SMES:AR02	-0.332959	13.5165	-2.7459	0.0145275	0.130161	-2.99945
Q13617	CUL2	PMA:SMES:AR02	-0.292257	13.8467	-2.74374	0.0145915	0.130161	-3.00337
Q9BX40	LSM14B	PMA:SMES:AR02	-0.805972	11.1874	-2.74352	0.0145981	0.130161	-3.00378
Q13367	AP3B2	PMA:SMES:AR02	-0.431135	13.5331	-2.74344	0.0146005	0.130161	-3.00392
Q8NDA8	MROH1	PMA:SMES:AR02	-0.347236	13.1746	-2.74328	0.0146055	0.130161	-3.00423
Q70EL1	USP54	PMA:SMES:AR02	-1.29419	11.2129	-2.74068	0.014683	0.130376	-3.00895
P23468	PTPRD	PMA:SMES:AR02	-0.814783	13.0692	-2.73973	0.0147118	0.130376	-3.0107
Q92616	GCN1	PMA:SMES:AR02	-0.284704	14.1292	-2.73946	0.0147199	0.130376	-3.01119
Q9Y490	TLN1	PMA:SMES:AR02	-0.35355	18.2835	-2.73928	0.0147253	0.130376	-3.01151
P28331	NDUFS1	PMA:SMES:AR02	-0.330898	14.0794	-2.73539	0.0148427	0.131155	-3.0186
Q9NXN4	GDAP2	PMA:SMES:AR02	-0.400617	13.7893	-2.73477	0.0148613	0.131155	-3.01972
Q16795	NDUFA9	PMA:SMES:AR02	-0.287244	14.0571	-2.73319	0.0149096	0.131368	-3.02261
O14964	HGS	PMA:SMES:AR02	-0.43597	15.0356	-2.73119	0.0149705	0.131572	-3.02625
P08514	ITGA2B	PMA:SMES:AR02	-0.556783	14.316	-2.7308	0.0149824	0.131572	-3.02696
Q9BSJ8	ESYT1	PMA:SMES:AR02	-0.386999	15.2727	-2.72934	0.0150271	0.131572	-3.02961
Q8WVM7	STAG1	PMA:SMES:AR02	0.377228	13.4857	2.72925	0.0150299	0.131572	-3.02978
P05107	ITGB2	PMA:SMES:AR02	-0.394802	19.116	-2.7282	0.015062	0.131572	-3.03168
Q8NFW8	CMAS	PMA:SMES:AR02	-0.529333	14.3795	-2.7277	0.0150775	0.131572	-3.0326
Q13232	NME3	PMA:SMES:AR02	-0.744901	12.1692	-2.72529	0.0151518	0.13201	-3.03699
O60313	OPA1	PMA:SMES:AR02	-0.439557	13.2091	-2.72195	0.0152552	0.132632	-3.04305
P09110	ACAA1	PMA:SMES:AR02	-0.509496	16.1739	-2.72133	0.0152747	0.132632	-3.04419
Q9BPW8	NIPSNAP1	PMA:SMES:AR02	-0.618471	12.7093	-2.72064	0.0152963	0.132632	-3.04544
Q5T4S7	UBR4	PMA:SMES:AR02	-0.284545	14.4403	-2.71675	0.0154182	0.133319	-3.05252
Q13613	MTMR1	PMA:SMES:AR02	-0.679012	12.1991	-2.71637	0.0154301	0.133319	-3.05321
Q9H0I9	TKTL2	PMA:SMES:AR02	-0.52851	15.5719	-2.71578	0.0154487	0.133319	-3.05429
Q96JJ7	TMX3	PMA:SMES:AR02	-0.543319	13.5861	-2.71396	0.0155058	0.133352	-3.05758
Q7L211	ABHD13	PMA:SMES:AR02	-1.05715	10.3753	-2.71285	0.015541	0.133352	-3.0596
P47897	QARS1	PMA:SMES:AR02	-0.365581	14.6453	-2.7127	0.0155458	0.133352	-3.05987
Q9H9Q2	COPS7B	PMA:SMES:AR02	-0.426317	13.6386	-2.71102	0.0155993	0.133352	-3.06293
O00410	IPO5	PMA:SMES:AR02	-0.37421	15.0178	-2.71067	0.0156102	0.133352	-3.06356
P51817	PRKX	PMA:SMES:AR02	1.45683	13.9382	2.71014	0.0156273	0.133352	-3.06453
P26196	DDX6	PMA:SMES:AR02	-0.395843	16.0209	-2.70886	0.0156681	0.133352	-3.06685
Q16775	HAGH	PMA:SMES:AR02	-0.465611	14.247	-2.70866	0.0156745	0.133352	-3.06722
O15040	TECPR2	PMA:SMES:AR02	-0.260776	14.2161	-2.70789	0.0156991	0.133352	-3.06861
Q9P265	DIP2B	PMA:SMES:AR02	-0.285287	14.1873	-2.70742	0.015714	0.133352	-3.06946
O43396	TXNL1	PMA:SMES:AR02	0.476355	14.7153	2.70716	0.0157223	0.133352	-3.06993
O00170	AIP	PMA:SMES:AR02	-0.28423	14.9067	-2.70504	0.0157905	0.133352	-3.07379
O43676	NDUFB3	PMA:SMES:AR02	-0.450285	13.7098	-2.70425	0.015816	0.133352	-3.07522
P0DMV8	HSPA1A	PMA:SMES:AR02	-0.340412	19.573	-2.70313	0.015852	0.133352	-3.07725
Q14696	MESD	PMA:SMES:AR02	-0.64405	12.5627	-2.70301	0.0158559	0.133352	-3.07747
Q06136	KDSR	PMA:SMES:AR02	-0.563202	11.6145	-2.70098	0.0159215	0.133352	-3.08115
Q8NEZ2	VPS37A	PMA:SMES:AR02	-0.482977	12.277	-2.70057	0.0159348	0.133352	-3.08189
Q06210	GFPT1	PMA:SMES:AR02	-0.344992	14.0583	-2.69949	0.0159699	0.133352	-3.08385
Q16401	PSMD5	PMA:SMES:AR02	-0.324317	15.3522	-2.69906	0.0159841	0.133352	-3.08464
O15381	NVL	PMA:SMES:AR02	-1.23926	9.82967	-2.69889	0.0159896	0.133352	-3.08495
Q9BX68	HINT2	PMA:SMES:AR02	-0.59623	12.1505	-2.69815	0.0160137	0.133352	-3.08629
O75503	CLN5	PMA:SMES:AR02	-0.396316	14.3412	-2.69675	0.0160594	0.133352	-3.08883
P33121	ACSL1	PMA:SMES:AR02	-0.409311	15.8889	-2.69643	0.0160698	0.133352	-3.0894
O75251	NDUFS7	PMA:SMES:AR02	-0.4154	13.2692	-2.69627	0.016075	0.133352	-3.08969
Q13595	TRA2A	PMA:SMES:AR02	-0.581942	12.7722	-2.69605	0.0160821	0.133352	-3.09008
A1L0T0	ILVBL	PMA:SMES:AR02	-0.395078	12.287	-2.69492	0.0161193	0.133352	-3.09215
Q7L2H7	EIF3M	PMA:SMES:AR02	-0.60097	13.4552	-2.69455	0.0161313	0.133352	-3.0928
Q9NSD9	FARSB	PMA:SMES:AR02	-0.310441	15.047	-2.69437	0.0161372	0.133352	-3.09313
Q6AWC2	WWC2	PMA:SMES:AR02	-2.60136	13.3718	-2.69345	0.0161674	0.1334	-3.0948
P14174	MIF	PMA:SMES:AR02	-0.426029	20.0964	-2.69156	0.0162298	0.133465	-3.09823
P05161	ISG15	PMA:SMES:AR02	-0.472597	12.8178	-2.69064	0.0162604	0.133465	-3.09991
Q63HN8	RNF213	PMA:SMES:AR02	-0.277432	14.368	-2.69013	0.0162771	0.133465	-3.10082
Q8N9N7	LRRC57	PMA:SMES:AR02	-0.354444	14.9474	-2.69011	0.016278	0.133465	-3.10087
Q14558	PRPSAP1	PMA:SMES:AR02	-0.591272	14.586	-2.68951	0.0162978	0.133465	-3.10195
Q9UFP1	GASK1A	PMA:SMES:AR02	-1.41463	11.5648	-2.68738	0.0163685	0.133643	-3.1058
Q8WWY3	PRPF31	PMA:SMES:AR02	-0.347422	13.9692	-2.68722	0.0163739	0.133643	-3.1061
Q9NTJ3	SMC4	PMA:SMES:AR02	-0.660129	12.2672	-2.68423	0.0164738	0.133643	-3.11151
Q86YV0	RASAL3	PMA:SMES:AR02	-0.301812	15.2617	-2.68414	0.0164768	0.133643	-3.11167
P49840	GSK3A	PMA:SMES:AR02	-0.46225	12.9027	-2.68361	0.0164947	0.133643	-3.11264
Q9UMS4	PRPF19	PMA:SMES:AR02	-0.429937	14.1035	-2.68319	0.0165087	0.133643	-3.1134
P54840	GYS2	PMA:SMES:AR02	-0.439591	15.8976	-2.68314	0.0165102	0.133643	-3.11348
Q02224	CENPE	PMA:SMES:AR02	-0.669111	15.011	-2.68249	0.0165322	0.133643	-3.11466
Q8N1I0	DOCK4	PMA:SMES:AR02	0.409894	15.9813	2.68167	0.0165597	0.133643	-3.11614
Q92688	ANP32B	PMA:SMES:AR02	-0.426725	16.592	-2.68009	0.0166131	0.133643	-3.11901
Q6ZTN6	ANKRD13D	PMA:SMES:AR02	-0.390342	13.6198	-2.679	0.0166498	0.133643	-3.12097
O60828	PQBP1	PMA:SMES:AR02	-0.381151	15.6549	-2.67898	0.0166507	0.133643	-3.12102
Q9BS40	LXN	PMA:SMES:AR02	-0.456822	14.8503	-2.67872	0.0166593	0.133643	-3.12148
Q9H3M7	TXNIP	PMA:SMES:AR02	-0.339627	14.0379	-2.67749	0.0167013	0.133643	-3.12372
O60826	CCDC22	PMA:SMES:AR02	-0.363245	15.6845	-2.67685	0.0167227	0.133643	-3.12486
Q2PPJ7	RALGAPA2	PMA:SMES:AR02	-0.349387	13.5336	-2.67534	0.0167742	0.133643	-3.12759
Q96AY4	TTC28	PMA:SMES:AR02	-1.20563	15.9458	-2.67529	0.016776	0.133643	-3.12769
P48735	IDH2	PMA:SMES:AR02	-0.252866	15.812	-2.67453	0.0168018	0.133643	-3.12906
Q92820	GGH	PMA:SMES:AR02	-0.33554	16.4857	-2.67271	0.0168643	0.133643	-3.13236
P78417	GSTO1	PMA:SMES:AR02	-0.343952	18.9787	-2.67212	0.0168845	0.133643	-3.13342
P37287	PIGA	PMA:SMES:AR02	-1.45641	10.4234	-2.67158	0.0169028	0.133643	-3.13439
Q9UBS8	RNF14	PMA:SMES:AR02	-0.71075	11.4086	-2.67103	0.0169219	0.133643	-3.1354
P42765	ACAA2	PMA:SMES:AR02	-0.329301	15.2811	-2.66995	0.0169589	0.133643	-3.13734
P06493	CDK1	PMA:SMES:AR02	-0.917558	11.4923	-2.66955	0.0169729	0.133643	-3.13807
Q9UNZ2	NSFL1C	PMA:SMES:AR02	-0.363377	14.9487	-2.66863	0.0170045	0.133643	-3.13972
C9JRZ8	AKR1B15	PMA:SMES:AR02	1.43728	12.0895	2.66817	0.0170205	0.133643	-3.14056
Q13310	PABPC4	PMA:SMES:AR02	-0.341048	13.0595	-2.66794	0.0170285	0.133643	-3.14098
Q8IYD1	GSPT2	PMA:SMES:AR02	-0.347319	13.358	-2.66792	0.0170291	0.133643	-3.14101
Q9UHD9	UBQLN2	PMA:SMES:AR02	-0.457332	13.919	-2.66789	0.01703	0.133643	-3.14106
Q12996	CSTF3	PMA:SMES:AR02	-0.463608	13.6189	-2.66433	0.0171538	0.13368	-3.1475
O94915	FRYL	PMA:SMES:AR02	-0.346109	17.7632	-2.66426	0.0171563	0.13368	-3.14763
Q9UJV3	MID2	PMA:SMES:AR02	-0.859449	13.4194	-2.66365	0.0171776	0.13368	-3.14873
Q8NBE8	KLHL23	PMA:SMES:AR02	-1.30247	11.6734	-2.66309	0.0171969	0.13368	-3.14973
P52788	SMS	PMA:SMES:AR02	-0.364719	14.1244	-2.66173	0.0172447	0.13368	-3.1522
O94804	STK10	PMA:SMES:AR02	-0.504555	15.3913	-2.66154	0.0172513	0.13368	-3.15254
Q9UK59	DBR1	PMA:SMES:AR02	-0.441175	12.7814	-2.66114	0.0172653	0.13368	-3.15326
Q9NV88	INTS9	PMA:SMES:AR02	-0.41525	12.4431	-2.66084	0.0172756	0.13368	-3.15379
Q5T280	SPOUT1	PMA:SMES:AR02	-1.22577	11.67	-2.65976	0.0173136	0.13368	-3.15575
P35914	HMGCL	PMA:SMES:AR02	-0.813337	11.7094	-2.65889	0.0173441	0.13368	-3.15731
Q14C86	GAPVD1	PMA:SMES:AR02	-0.303143	13.8227	-2.65883	0.0173465	0.13368	-3.15743
Q9H008	LHPP	PMA:SMES:AR02	0.615587	14.1753	2.65772	0.0173855	0.13368	-3.15943
Q15437	SEC23B	PMA:SMES:AR02	-0.352767	14.4117	-2.65739	0.0173973	0.13368	-3.16004
Q96D46	NMD3	PMA:SMES:AR02	-0.996686	10.8492	-2.65652	0.0174278	0.13368	-3.16159
O95352	ATG7	PMA:SMES:AR02	-0.341373	16.2144	-2.65454	0.017498	0.13368	-3.16516
O95340	PAPSS2	PMA:SMES:AR02	-0.500509	12.4336	-2.65403	0.0175161	0.13368	-3.16608
Q8N9V3	WDSUB1	PMA:SMES:AR02	-0.827879	11.0838	-2.65398	0.0175178	0.13368	-3.16617
P48739	PITPNB	PMA:SMES:AR02	0.308903	13.4885	2.65362	0.0175308	0.13368	-3.16683
Q14116	IL18	PMA:SMES:AR02	0.459317	14.8533	2.65361	0.0175312	0.13368	-3.16685
Q13426	XRCC4	PMA:SMES:AR02	-0.600982	13.5532	-2.65225	0.0175795	0.13368	-3.16929
Q96S44	TP53RK	PMA:SMES:AR02	-0.569995	13.1972	-2.65188	0.0175929	0.13368	-3.16997
O60934	NBN	PMA:SMES:AR02	-0.287342	14.8759	-2.65174	0.0175978	0.13368	-3.17022
Q68D91	MBLAC2	PMA:SMES:AR02	-0.940186	10.1965	-2.65172	0.0175985	0.13368	-3.17025
Q9Y6G9	DYNC1LI1	PMA:SMES:AR02	-0.323822	13.6142	-2.65031	0.017649	0.133877	-3.1728
P49459	UBE2A	PMA:SMES:AR02	0.511424	12.563	2.64723	0.0177597	0.134529	-3.17836
Q6P1N9	TATDN1	PMA:SMES:AR02	-0.54232	12.6206	-2.64229	0.0179385	0.135642	-3.18726
Q14790	CASP8	PMA:SMES:AR02	-0.380234	14.7523	-2.6418	0.0179563	0.135642	-3.18814
Q9Y3D6	FIS1	PMA:SMES:AR02	-0.549861	13.6401	-2.63936	0.0180451	0.13608	-3.19252
Q9NZI8	IGF2BP1	PMA:SMES:AR02	-0.640393	11.4107	-2.63884	0.0180641	0.13608	-3.19346
Q9Y315	DERA	PMA:SMES:AR02	-0.403352	13.905	-2.63688	0.0181362	0.136434	-3.19699
Q6NYC8	PPP1R18	PMA:SMES:AR02	0.582885	13.8392	2.63483	0.0182115	0.136812	-3.20067
Q14204	DYNC1H1	PMA:SMES:AR02	-0.25545	15.9453	-2.63276	0.0182882	0.137184	-3.20441
Q96BI1	SLC22A18	PMA:SMES:AR02	-0.532856	12.1976	-2.63213	0.0183114	0.137184	-3.20553
Q9UPW5	AGTPBP1	PMA:SMES:AR02	-0.336993	13.668	-2.62992	0.0183938	0.137613	-3.20952
Q96C86	DCPS	PMA:SMES:AR02	-0.402041	14.2452	-2.62771	0.0184761	0.137816	-3.21348
P51659	HSD17B4	PMA:SMES:AR02	-0.370258	14.7516	-2.62721	0.018495	0.137816	-3.21439
Q16739	UGCG	PMA:SMES:AR02	-0.762808	11.4223	-2.62716	0.0184967	0.137816	-3.21448
Q9H0E9	BRD8	PMA:SMES:AR02	-0.579616	12.1088	-2.62617	0.0185339	0.137904	-3.21626
Q8TF42	UBASH3B	PMA:SMES:AR02	-0.472903	13.5709	-2.6241	0.0186118	0.138295	-3.21998
P04920	SLC4A2	PMA:SMES:AR02	-0.343987	12.7038	-2.62258	0.0186692	0.138533	-3.22272
Q8N4P3	HDDC3	PMA:SMES:AR02	-0.716248	11.0114	-2.62072	0.0187393	0.138865	-3.22604
Q9Y2T2	AP3M1	PMA:SMES:AR02	-0.494701	13.4656	-2.61975	0.0187763	0.13895	-3.22779
Q643R3	LPCAT4	PMA:SMES:AR02	-1.67668	9.527	-2.61862	0.0188192	0.139079	-3.22982
Q9UGJ1	TUBGCP4	PMA:SMES:AR02	-0.886713	11.481	-2.61762	0.0188574	0.139172	-3.23162
Q9H9H4	VPS37B	PMA:SMES:AR02	-0.585576	13.8326	-2.61654	0.0188988	0.139289	-3.23356
O15265	ATXN7	PMA:SMES:AR02	0.788119	11.3942	2.61549	0.0189388	0.139395	-3.23544
Q9UDW1	UQCR10	PMA:SMES:AR02	-0.402783	15.2575	-2.61399	0.0189965	0.139632	-3.23813
P63218	GNG5	PMA:SMES:AR02	-1.26333	11.4879	-2.61014	0.0191448	0.140462	-3.24504
P28039	AOAH	PMA:SMES:AR02	0.763514	11.2615	2.6085	0.0192083	0.140462	-3.24797
Q92793	CREBBP	PMA:SMES:AR02	-0.95341	11.5101	-2.6083	0.0192162	0.140462	-3.24834
Q9H875	PRKRIP1	PMA:SMES:AR02	-0.634265	10.7229	-2.6082	0.01922	0.140462	-3.24851
Q03519	TAP2	PMA:SMES:AR02	-0.375532	15.1481	-2.60756	0.0192449	0.140462	-3.24966
Q5TEU4	NDUFAF5	PMA:SMES:AR02	-1.02885	11.822	-2.60682	0.0192738	0.140462	-3.25099
Q5HYK3	COQ5	PMA:SMES:AR02	-0.970108	9.76338	-2.60641	0.0192897	0.140462	-3.25172
Q08752	PPID	PMA:SMES:AR02	0.414421	13.7191	2.60445	0.0193663	0.140688	-3.25524
P30519	HMOX2	PMA:SMES:AR02	-0.330368	14.0062	-2.6043	0.0193724	0.140688	-3.25552
Q7KZF4	SND1	PMA:SMES:AR02	-0.294643	15.0381	-2.60125	0.0194919	0.141368	-3.26097
P13984	GTF2F2	PMA:SMES:AR02	-0.300367	13.5479	-2.5987	0.0195925	0.141649	-3.26553
Q14156	EFR3A	PMA:SMES:AR02	-0.354596	13.0148	-2.59718	0.0196529	0.141649	-3.26826
Q06481	APLP2	PMA:SMES:AR02	0.651062	10.8652	2.59685	0.0196659	0.141649	-3.26885
P17050	NAGA	PMA:SMES:AR02	-0.427434	13.7447	-2.59656	0.0196775	0.141649	-3.26937
O00442	RTCA	PMA:SMES:AR02	-0.326032	14.0348	-2.59637	0.019685	0.141649	-3.26971
Q7Z4W1	DCXR	PMA:SMES:AR02	-0.295625	14.9291	-2.59603	0.0196984	0.141649	-3.27031
P49184	DNASE1L1	PMA:SMES:AR02	-0.807085	12.3415	-2.59419	0.0197721	0.141649	-3.27362
Q8N5H7	SH2D3C	PMA:SMES:AR02	-0.415003	12.1519	-2.59408	0.0197762	0.141649	-3.27381
Q9UMR2	DDX19B	PMA:SMES:AR02	-0.671276	12.4645	-2.59372	0.0197906	0.141649	-3.27445
Q9P015	MRPL15	PMA:SMES:AR02	-0.783872	10.5216	-2.59305	0.0198175	0.141649	-3.27566
Q13148	TARDBP	PMA:SMES:AR02	-0.52968	14.4827	-2.59299	0.0198199	0.141649	-3.27576
Q9Y4D8		PMA:SMES:AR02	-1.18494	14.5093	-2.59152	0.0198787	0.141649	-3.27839
Q86VR8	FJX1	PMA:SMES:AR02	-0.712769	11.9111	-2.58932	0.0199674	0.141649	-3.28233
O14561	NDUFAB1	PMA:SMES:AR02	-0.864043	12.1198	-2.58841	0.0200041	0.141649	-3.28396
Q9UL42	PNMA2	PMA:SMES:AR02	1.69165	12.7859	2.58612	0.0200966	0.141649	-3.28805
Q96FV2	SCRN2	PMA:SMES:AR02	-0.489769	12.1628	-2.58611	0.0200971	0.141649	-3.28807
P14324	FDPS	PMA:SMES:AR02	0.319101	14.9382	2.586	0.0201014	0.141649	-3.28826
P01861		PMA:SMES:AR02	-1.54638	11.8273	-2.58586	0.0201071	0.141649	-3.28851
P55263	ADK	PMA:SMES:AR02	-0.428568	15.1178	-2.58565	0.0201157	0.141649	-3.28889
P08240	SRPRA	PMA:SMES:AR02	-0.363868	13.7985	-2.58505	0.0201402	0.141649	-3.28997
O75323	NIPSNAP2	PMA:SMES:AR02	-0.562198	12.1641	-2.58408	0.0201793	0.141649	-3.29169
Q00577	PURA	PMA:SMES:AR02	-0.588431	12.502	-2.58405	0.0201807	0.141649	-3.29175
Q6ZS11	RINL	PMA:SMES:AR02	-0.556688	11.8068	-2.58386	0.0201883	0.141649	-3.29208
P09601	HMOX1	PMA:SMES:AR02	-0.507116	11.5019	-2.58377	0.0201921	0.141649	-3.29225
Q8WXH0	SYNE2	PMA:SMES:AR02	-0.269922	15.6994	-2.58371	0.0201947	0.141649	-3.29236
Q9HB40	SCPEP1	PMA:SMES:AR02	-0.478322	13.3283	-2.58343	0.0202058	0.141649	-3.29285
P49757	NUMB	PMA:SMES:AR02	-0.334962	14.3876	-2.58061	0.0203214	0.142276	-3.2979
P58546	MTPN	PMA:SMES:AR02	-0.41831	17.0676	-2.57889	0.0203919	0.142496	-3.30097
Q9Y5B8	NME7	PMA:SMES:AR02	-0.941547	10.1616	-2.57857	0.0204051	0.142496	-3.30154
P15927	RPA2	PMA:SMES:AR02	-0.291244	14.5564	-2.57779	0.0204372	0.142538	-3.30293
Q96FX7	TRMT61A	PMA:SMES:AR02	-0.859047	11.8566	-2.57701	0.0204692	0.142579	-3.30432
P42685	FRK	PMA:SMES:AR02	0.55215	15.0316	2.57596	0.0205125	0.142698	-3.30619
O14976	GAK	PMA:SMES:AR02	-0.320113	14.0207	-2.57507	0.0205494	0.142706	-3.30778
O75884	RBBP9	PMA:SMES:AR02	-0.47973	14.3949	-2.57427	0.0205825	0.142706	-3.30921
Q8WWW0	RASSF5	PMA:SMES:AR02	0.325419	14.2957	2.5739	0.0205981	0.142706	-3.30988
Q96HR3	MED30	PMA:SMES:AR02	-0.675486	11.0829	-2.5721	0.020673	0.142706	-3.3131
Q9UHQ9	CYB5R1	PMA:SMES:AR02	-0.390793	13.9977	-2.57128	0.020707	0.142706	-3.31455
Q04206	RELA	PMA:SMES:AR02	-0.396471	13.2154	-2.57117	0.0207116	0.142706	-3.31474
Q14289	PTK2B	PMA:SMES:AR02	-0.243277	14.9679	-2.57093	0.0207217	0.142706	-3.31518
Q5T8P6	RBM26	PMA:SMES:AR02	-0.640069	13.0289	-2.5709	0.020723	0.142706	-3.31523
P29374	ARID4A	PMA:SMES:AR02	-0.802352	11.7164	-2.56959	0.0207778	0.142756	-3.31757
P29728	OAS2	PMA:SMES:AR02	-0.77704	12.9914	-2.56947	0.0207826	0.142756	-3.31778
Q9UL18	AGO1	PMA:SMES:AR02	-0.371337	12.7331	-2.56875	0.0208127	0.142783	-3.31906
O60673	REV3L	PMA:SMES:AR02	-0.660682	13.5175	-2.56813	0.0208389	0.142783	-3.32017
Q92973	TNPO1	PMA:SMES:AR02	-0.291031	14.5918	-2.56674	0.0208975	0.143005	-3.32265
P18433	PTPRA	PMA:SMES:AR02	-0.398902	12.0386	-2.5655	0.0209494	0.143181	-3.32485
Q6ZVM7	TOM1L2	PMA:SMES:AR02	0.488625	12.523	2.56365	0.0210276	0.143535	-3.32815
Q15555	MAPRE2	PMA:SMES:AR02	0.80672	11.9074	2.56125	0.0211299	0.144	-3.33244
O00712	NFIB	PMA:SMES:AR02	1.15296	17.1208	2.56081	0.0211485	0.144	-3.33322
P53611	RABGGTB	PMA:SMES:AR02	-0.75744	10.7575	-2.55903	0.0212245	0.144337	-3.33639
Q08211	DHX9	PMA:SMES:AR02	-0.307102	17.8367	-2.55665	0.021326	0.144847	-3.34062
Q02539	H1-1	PMA:SMES:AR02	-0.918908	15.9845	-2.55391	0.0214442	0.14512	-3.34551
Q96I24	FUBP3	PMA:SMES:AR02	0.373827	12.9395	2.55383	0.0214476	0.14512	-3.34565
P15309	ACP3	PMA:SMES:AR02	-0.675584	12.9823	-2.55351	0.0214615	0.14512	-3.34622
P62273	RPS29	PMA:SMES:AR02	1.17055	13.5577	2.55325	0.0214727	0.14512	-3.34668
Q9UL26	RAB22A	PMA:SMES:AR02	0.754777	13.396	2.55241	0.0215091	0.145126	-3.34818
P0DOX7		PMA:SMES:AR02	-0.852786	13.2451	-2.552	0.0215267	0.145126	-3.3489
P50993	ATP1A2	PMA:SMES:AR02	-0.588247	12.5184	-2.54813	0.0216949	0.146079	-3.35578
Q9H8T0	AKTIP	PMA:SMES:AR02	-0.450399	12.0698	-2.5468	0.0217532	0.146291	-3.35815
P23396	RPS3	PMA:SMES:AR02	-0.26409	16.4478	-2.54402	0.021875	0.146908	-3.36309
P26639	TARS1	PMA:SMES:AR02	-0.289195	14.996	-2.54348	0.0218989	0.146908	-3.36406
Q3B726	POLR1F	PMA:SMES:AR02	-0.757419	11.2635	-2.54191	0.0219676	0.14697	-3.36683
Q14980	NUMA1	PMA:SMES:AR02	-0.379702	15.6464	-2.54185	0.0219704	0.14697	-3.36694
Q6ZNJ1	NBEAL2	PMA:SMES:AR02	-0.33898	14.6286	-2.54143	0.0219889	0.14697	-3.36768
O95292	VAPB	PMA:SMES:AR02	-0.503995	16.159	-2.5385	0.022119	0.147572	-3.3729
P45974	USP5	PMA:SMES:AR02	-0.338381	18.8282	-2.53782	0.0221491	0.147572	-3.3741
Q96IU4	ABHD14B	PMA:SMES:AR02	-0.67555	15.2748	-2.53739	0.0221684	0.147572	-3.37487
Q05655	PRKCD	PMA:SMES:AR02	-0.298636	16.2191	-2.53697	0.0221872	0.147572	-3.37562
Q9Y646	CPQ	PMA:SMES:AR02	-0.843139	10.7145	-2.5346	0.0222927	0.147925	-3.37981
Q9NZC3	GDE1	PMA:SMES:AR02	-0.489869	12.5183	-2.53456	0.0222945	0.147925	-3.37988
Q12882	DPYD	PMA:SMES:AR02	-0.305543	13.5744	-2.53304	0.0223629	0.147933	-3.38259
O95789	ZMYM6	PMA:SMES:AR02	-0.464769	15.577	-2.53299	0.0223649	0.147933	-3.38267
Q8NDX1	PSD4	PMA:SMES:AR02	-0.417832	14.0124	-2.53272	0.0223771	0.147933	-3.38315
P07355	ANXA2	PMA:SMES:AR02	-0.44897	15.1554	-2.53147	0.0224334	0.148126	-3.38537
Q92882	OSTF1	PMA:SMES:AR02	-0.547311	16.8623	-2.53049	0.0224775	0.148238	-3.3871
O95479	H6PD	PMA:SMES:AR02	-0.320182	15.0213	-2.52987	0.0225055	0.148243	-3.3882
A0FGR8	ESYT2	PMA:SMES:AR02	-0.309186	15.798	-2.52631	0.0226669	0.149126	-3.39452
O60449	LY75	PMA:SMES:AR02	-0.486981	12.509	-2.52457	0.0227464	0.149461	-3.39761
P29353	SHC1	PMA:SMES:AR02	-0.422969	13.2029	-2.52399	0.0227726	0.149461	-3.39863
P48047	ATP5PO	PMA:SMES:AR02	-0.283596	16.8332	-2.52158	0.0228829	0.150004	-3.40289
Q13409	DYNC1I2	PMA:SMES:AR02	0.904193	12.0756	2.52072	0.0229224	0.150083	-3.40441
Q9Y4X5	ARIH1	PMA:SMES:AR02	-0.724536	10.9561	-2.51845	0.0230271	0.150129	-3.40844
P61758	VBP1	PMA:SMES:AR02	-0.32893	13.6559	-2.51735	0.0230778	0.150129	-3.41038
Q01130	SRSF2	PMA:SMES:AR02	1.37906	15.8443	2.51677	0.0231051	0.150129	-3.41142
O95573	ACSL3	PMA:SMES:AR02	-0.355034	13.064	-2.51667	0.0231097	0.150129	-3.4116
Q5T1R4	HIVEP3	PMA:SMES:AR02	2.82816	15.6597	2.51664	0.0231109	0.150129	-3.41164
Q9H0J9	PARP12	PMA:SMES:AR02	-0.538736	12.1236	-2.51642	0.0231209	0.150129	-3.41203
Q86XX4	FRAS1	PMA:SMES:AR02	1.07264	13.2872	2.51512	0.0231816	0.150129	-3.41434
P51970	NDUFA8	PMA:SMES:AR02	-0.717943	12.8162	-2.51433	0.0232182	0.150129	-3.41573
Q96N67	DOCK7	PMA:SMES:AR02	0.782631	13.5236	2.51412	0.0232277	0.150129	-3.41609
Q9BRR9	ARHGAP9	PMA:SMES:AR02	-0.608755	15.9345	-2.51412	0.023228	0.150129	-3.41611
Q9NR46	SH3GLB2	PMA:SMES:AR02	-0.33377	14.0353	-2.51403	0.0232323	0.150129	-3.41627
Q99714	HSD17B10	PMA:SMES:AR02	-0.39436	16.0553	-2.51241	0.0233076	0.150438	-3.41912
Q99805	TM9SF2	PMA:SMES:AR02	-0.379102	13.3719	-2.51128	0.0233606	0.150601	-3.42113
P49748	ACADVL	PMA:SMES:AR02	-0.309113	14.8163	-2.50991	0.0234246	0.150836	-3.42354
P46109	CRKL	PMA:SMES:AR02	-0.331926	16.172	-2.50847	0.0234926	0.150961	-3.4261
P50225	SULT1A1	PMA:SMES:AR02	-0.305767	16.3584	-2.50832	0.0234994	0.150961	-3.42636
P40763	STAT3	PMA:SMES:AR02	-0.323319	14.9656	-2.50675	0.0235733	0.151258	-3.42913
Q5JSZ5	PRRC2B	PMA:SMES:AR02	-0.631267	12.6618	-2.50362	0.0237217	0.152031	-3.43466
O00214	LGALS8	PMA:SMES:AR02	-0.62504	13.5851	-2.50227	0.023786	0.152264	-3.43705
Q8TBP6	SLC25A40	PMA:SMES:AR02	-0.376577	12.7872	-2.50143	0.0238258	0.15234	-3.43852
Q9UJX3	ANAPC7	PMA:SMES:AR02	-0.690749	12.4131	-2.50006	0.0238916	0.152374	-3.44095
O15530	PDPK1	PMA:SMES:AR02	-0.536066	12.5578	-2.49958	0.0239142	0.152374	-3.44179
P60983	GMFB	PMA:SMES:AR02	0.797962	13.534	2.49957	0.023915	0.152374	-3.44182
Q9Y2L5	TRAPPC8	PMA:SMES:AR02	-0.281284	14.8162	-2.49653	0.0240608	0.153002	-3.44718
P49662	CASP4	PMA:SMES:AR02	0.465964	13.5266	2.49635	0.0240697	0.153002	-3.4475
P07948	LYN	PMA:SMES:AR02	-0.326909	16.2692	-2.49454	0.0241565	0.153003	-3.45068
Q7Z6I6	ARHGAP30	PMA:SMES:AR02	-0.345111	14.8365	-2.49436	0.0241654	0.153003	-3.451
Q9NVE7	PANK4	PMA:SMES:AR02	-0.335283	12.5672	-2.49358	0.024203	0.153003	-3.45237
P35813	PPM1A	PMA:SMES:AR02	-0.359875	14.4173	-2.49347	0.0242085	0.153003	-3.45257
Q7Z3U7	MON2	PMA:SMES:AR02	-0.307261	13.2639	-2.49309	0.0242271	0.153003	-3.45325
P14618	PKM	PMA:SMES:AR02	-0.310102	19.8471	-2.49253	0.0242539	0.153003	-3.45423
Q9H9Q4	NHEJ1	PMA:SMES:AR02	-1.19584	10.8323	-2.49228	0.0242661	0.153003	-3.45467
P49593	PPM1F	PMA:SMES:AR02	0.255455	13.8455	2.49107	0.0243251	0.153197	-3.45681
O14980	XPO1	PMA:SMES:AR02	-0.291621	15.5385	-2.48793	0.0244782	0.153567	-3.46234
Q99759	MAP3K3	PMA:SMES:AR02	-0.428209	13.8258	-2.48779	0.0244849	0.153567	-3.46258
P04899	GNAI2	PMA:SMES:AR02	-0.334851	18.1528	-2.48766	0.0244913	0.153567	-3.46281
O60869	EDF1	PMA:SMES:AR02	0.650111	15.0783	2.48662	0.0245424	0.153567	-3.46465
Q6ICG6	KIAA0930	PMA:SMES:AR02	-0.606059	15.6148	-2.48646	0.0245504	0.153567	-3.46494
P27448	MARK3	PMA:SMES:AR02	-0.33376	13.5238	-2.48605	0.0245705	0.153567	-3.46565
Q9HBG6	IFT122	PMA:SMES:AR02	-1.0651	13.5893	-2.48584	0.0245809	0.153567	-3.46603
Q7Z5R6	APBB1IP	PMA:SMES:AR02	-0.362944	15.5421	-2.4852	0.024612	0.153585	-3.46714
Q9NUU6	OTULINL	PMA:SMES:AR02	-0.527317	14.6461	-2.48449	0.0246472	0.15363	-3.4684
Q86VR2	RETREG3	PMA:SMES:AR02	-0.706106	11.9481	-2.48291	0.024725	0.153939	-3.47118
Q92888	ARHGEF1	PMA:SMES:AR02	-0.329782	16.3574	-2.48143	0.0247982	0.154135	-3.47378
P09669	COX6C	PMA:SMES:AR02	1.3748	14.5431	2.48113	0.0248131	0.154135	-3.47431
P58004	SESN2	PMA:SMES:AR02	0.458933	11.8041	2.47872	0.0249329	0.154703	-3.47855
A0AVT1	UBA6	PMA:SMES:AR02	-0.26108	14.6015	-2.47809	0.024964	0.15472	-3.47965
Q99570	PIK3R4	PMA:SMES:AR02	-0.284834	13.1717	-2.4775	0.0249936	0.154728	-3.4807
Q16563	SYPL1	PMA:SMES:AR02	1.24513	14.5883	2.47613	0.025062	0.154905	-3.4831
Q9H223	EHD4	PMA:SMES:AR02	-0.282022	13.919	-2.47579	0.025079	0.154905	-3.4837
O75694	NUP155	PMA:SMES:AR02	-0.356538	13.9016	-2.47406	0.0251659	0.155265	-3.48674
Q14152	EIF3A	PMA:SMES:AR02	-0.341984	15.4643	-2.47348	0.0251952	0.155271	-3.48777
Q9H270	VPS11	PMA:SMES:AR02	-0.295048	13.654	-2.47225	0.0252573	0.155478	-3.48994
P42680	TEC	PMA:SMES:AR02	-0.581665	11.7034	-2.47147	0.0252962	0.155521	-3.49129
Q7Z7A4	PXK	PMA:SMES:AR02	-0.443961	12.9223	-2.47098	0.0253213	0.155521	-3.49217
P14927	UQCRB	PMA:SMES:AR02	-0.40506	13.6043	-2.46985	0.0253785	0.155697	-3.49415
Q9Y3Z3	SAMHD1	PMA:SMES:AR02	-0.401823	15.1603	-2.4679	0.0254771	0.156126	-3.49757
O00178	GTPBP1	PMA:SMES:AR02	-0.336748	14.04	-2.4673	0.0255078	0.156139	-3.49863
P31153	MAT2A	PMA:SMES:AR02	-0.341666	13.372	-2.46551	0.0255988	0.156314	-3.50176
Q13107	USP4	PMA:SMES:AR02	-0.278609	14.6225	-2.46511	0.0256192	0.156314	-3.50246
Q5JPI9	EEF1AKMT2	PMA:SMES:AR02	-0.566504	11.2936	-2.46505	0.0256225	0.156314	-3.50258
O95169	NDUFB8	PMA:SMES:AR02	-0.566186	13.5442	-2.46295	0.0257301	0.156661	-3.50626
O60674	JAK2	PMA:SMES:AR02	-0.541735	11.7009	-2.46282	0.0257368	0.156661	-3.50649
Q8IZ07	ANKRD13A	PMA:SMES:AR02	-0.580266	13.3811	-2.46132	0.0258139	0.156822	-3.50913
O94888	UBXN7	PMA:SMES:AR02	-0.325421	13.6659	-2.46119	0.0258208	0.156822	-3.50936
Q96BP3	PPWD1	PMA:SMES:AR02	-0.374591	16.8566	-2.45889	0.0259392	0.157206	-3.51338
O75832	PSMD10	PMA:SMES:AR02	-0.617896	12.4269	-2.45884	0.0259417	0.157206	-3.51347
Q13131	PRKAA1	PMA:SMES:AR02	-0.370218	13.6954	-2.45821	0.0259741	0.157228	-3.51457
Q9NX46	ADPRS	PMA:SMES:AR02	-0.508804	13.489	-2.45642	0.0260673	0.157479	-3.51772
P42858	HTT	PMA:SMES:AR02	-0.284552	12.8857	-2.45605	0.0260863	0.157479	-3.51836
Q9UHW9	SLC12A6	PMA:SMES:AR02	-0.412239	11.4157	-2.45575	0.0261022	0.157479	-3.51889
Q9UNS2	COPS3	PMA:SMES:AR02	-0.463694	13.018	-2.45478	0.0261527	0.15761	-3.5206
Q9P2R3	ANKFY1	PMA:SMES:AR02	-0.325942	14.7481	-2.4519	0.0263031	0.158341	-3.52564
O00115	DNASE2	PMA:SMES:AR02	-0.555814	12.2836	-2.45103	0.0263485	0.158437	-3.52715
Q8TBC4	UBA3	PMA:SMES:AR02	-0.49863	13.3628	-2.45049	0.0263772	0.158437	-3.52811
O75533	SF3B1	PMA:SMES:AR02	-0.316583	15.2463	-2.44907	0.0264516	0.15856	-3.53059
Q9NTX5	ECHDC1	PMA:SMES:AR02	-0.360287	14.5266	-2.44899	0.0264557	0.15856	-3.53073
P83876	TXNL4A	PMA:SMES:AR02	-0.808888	10.8113	-2.44717	0.0265521	0.158912	-3.53392
O75396	SEC22B	PMA:SMES:AR02	0.421328	14.0703	2.44678	0.0265728	0.158912	-3.53461
O43665	RGS10	PMA:SMES:AR02	-0.658873	12.2429	-2.44564	0.026633	0.159098	-3.5366
Q96PU4	UHRF2	PMA:SMES:AR02	-0.847131	11.5369	-2.44449	0.0266942	0.159289	-3.53861
Q6STE5	SMARCD3	PMA:SMES:AR02	-1.01211	10.8741	-2.44299	0.0267739	0.15959	-3.54124
Q8WUA2	PPIL4	PMA:SMES:AR02	-0.516128	11.7987	-2.44231	0.0268098	0.15963	-3.54241
Q08AF3	SLFN5	PMA:SMES:AR02	-0.358151	12.6371	-2.44165	0.026845	0.159665	-3.54357
Q96QH2	PRAM1	PMA:SMES:AR02	-0.422363	15.8711	-2.43936	0.0269677	0.160064	-3.54757
Q92597	NDRG1	PMA:SMES:AR02	-0.421344	11.668	-2.4393	0.0269709	0.160064	-3.54768
Q9HBI1	PARVB	PMA:SMES:AR02	-0.581007	14.0396	-2.43867	0.0270047	0.160091	-3.54878
Q6IQ22	RAB12	PMA:SMES:AR02	-0.855088	9.86165	-2.43796	0.0270428	0.160143	-3.55002
Q9BWM7	SFXN3	PMA:SMES:AR02	-0.489365	13.5192	-2.43673	0.027109	0.160173	-3.55216
Q01518	CAP1	PMA:SMES:AR02	-0.267076	20.1816	-2.43639	0.0271277	0.160173	-3.55277
P06127	CD5	PMA:SMES:AR02	-0.537823	12.0549	-2.43561	0.0271696	0.160173	-3.55413
O00409	FOXN3	PMA:SMES:AR02	-0.623324	11.794	-2.43513	0.0271957	0.160173	-3.55497
O95671	ASMTL	PMA:SMES:AR02	-0.289828	12.6768	-2.4342	0.0272457	0.160173	-3.55658
Q96SK2	TMEM209	PMA:SMES:AR02	-1.13704	11.716	-2.43357	0.02728	0.160173	-3.55769
Q96KR1	ZFR	PMA:SMES:AR02	-0.477256	12.5242	-2.43352	0.0272827	0.160173	-3.55777
Q92947	GCDH	PMA:SMES:AR02	-0.363219	13.1297	-2.43283	0.0273201	0.160173	-3.55898
Q9UBW5	BIN2	PMA:SMES:AR02	-0.584931	14.7017	-2.43207	0.0273616	0.160173	-3.56031
O75976	CPD	PMA:SMES:AR02	-0.617866	11.8458	-2.43192	0.0273699	0.160173	-3.56058
Q8IYI6	EXOC8	PMA:SMES:AR02	-0.368351	13.2878	-2.4316	0.0273869	0.160173	-3.56113
Q6UWD8	C16orf54	PMA:SMES:AR02	-0.862483	11.4337	-2.43136	0.0274003	0.160173	-3.56155
P49750	YLPM1	PMA:SMES:AR02	-0.356255	12.6443	-2.42989	0.0274801	0.160468	-3.56411
Q9BTE3	MCMBP	PMA:SMES:AR02	-0.304454	12.4447	-2.42682	0.0276483	0.161027	-3.56947
Q5JTV8	TOR1AIP1	PMA:SMES:AR02	-0.34435	16.5075	-2.42658	0.0276618	0.161027	-3.56989
P31942	HNRNPH3	PMA:SMES:AR02	-0.324501	15.5434	-2.42609	0.0276884	0.161027	-3.57074
Q96GG9	DCUN1D1	PMA:SMES:AR02	-0.372634	13.4657	-2.42599	0.027694	0.161027	-3.57092
Q9Y5L0	TNPO3	PMA:SMES:AR02	-0.319507	14.9172	-2.42506	0.0277451	0.161152	-3.57254
Q16719	KYNU	PMA:SMES:AR02	-0.728576	10.2653	-2.42429	0.0277875	0.161155	-3.57388
Q8N8R5	C2orf69	PMA:SMES:AR02	0.698046	11.7265	2.42378	0.0278161	0.161155	-3.57478
P12814	ACTN1	PMA:SMES:AR02	-0.387325	19.9916	-2.42345	0.0278343	0.161155	-3.57535
Q8N7R7	CCNYL1	PMA:SMES:AR02	0.486765	12.8058	2.41991	0.0280304	0.162119	-3.58152
O15294	OGT	PMA:SMES:AR02	-0.306861	12.5505	-2.41861	0.0281027	0.162364	-3.58377
P62314	SNRPD1	PMA:SMES:AR02	0.551013	15.6056	2.41726	0.0281783	0.162558	-3.58613
Q9H9G7	AGO3	PMA:SMES:AR02	-0.45262	12.6778	-2.41587	0.0282563	0.162558	-3.58856
P78347	GTF2I	PMA:SMES:AR02	-0.28389	12.8971	-2.41553	0.028275	0.162558	-3.58914
Q13838	DDX39B	PMA:SMES:AR02	-0.27483	17.3559	-2.4147	0.0283219	0.162558	-3.59059
Q93034	CUL5	PMA:SMES:AR02	-0.316192	13.6238	-2.41452	0.028332	0.162558	-3.59091
Q9UHV9	PFDN2	PMA:SMES:AR02	0.346944	14.7454	2.41444	0.0283364	0.162558	-3.59104
Q9Y376	CAB39	PMA:SMES:AR02	-0.297739	15.9609	-2.4135	0.0283893	0.162558	-3.59268
Q9UJ70	NAGK	PMA:SMES:AR02	-0.381359	17.5795	-2.41339	0.0283956	0.162558	-3.59287
Q6DN03		PMA:SMES:AR02	-1.3371	16.7209	-2.41323	0.0284044	0.162558	-3.59315
O60502	OGA	PMA:SMES:AR02	-0.329188	13.8517	-2.41219	0.028463	0.162722	-3.59495
Q8NFD5	ARID1B	PMA:SMES:AR02	-0.745272	10.4315	-2.41131	0.028513	0.162838	-3.59649
P20592	MX2	PMA:SMES:AR02	-0.289027	13.607	-2.41013	0.0285794	0.163046	-3.59853
Q9UJV9	DDX41	PMA:SMES:AR02	-0.333166	12.6403	-2.40794	0.0287041	0.163484	-3.60235
Q9H1C4	UNC93B1	PMA:SMES:AR02	-0.816125	11.7104	-2.40773	0.0287161	0.163484	-3.60272
P42785	PRCP	PMA:SMES:AR02	-0.365767	15.8558	-2.40692	0.0287622	0.163576	-3.60412
O94979	SEC31A	PMA:SMES:AR02	-0.334961	14.017	-2.40537	0.0288505	0.163705	-3.60681
Q5T6V5	QNG1	PMA:SMES:AR02	-0.377433	12.766	-2.40504	0.0288692	0.163705	-3.60738
Q6XQN6	NAPRT	PMA:SMES:AR02	-0.415643	16.0106	-2.40494	0.028875	0.163705	-3.60756
O75116	ROCK2	PMA:SMES:AR02	-0.348261	15.8824	-2.40401	0.0289286	0.163791	-3.60918
Q13889	GTF2H3	PMA:SMES:AR02	-1.24764	8.52931	-2.40363	0.0289502	0.163791	-3.60984
Q16851	UGP2	PMA:SMES:AR02	-0.303308	18.3609	-2.40268	0.029005	0.163931	-3.6115
Q9NSV4	DIAPH3	PMA:SMES:AR02	-1.30711	12.8774	-2.40092	0.0291061	0.164332	-3.61455
Q9BT78	COPS4	PMA:SMES:AR02	-0.219837	13.9797	-2.3987	0.0292341	0.1648	-3.61839
P49247	RPIA	PMA:SMES:AR02	-0.253875	14.9637	-2.39844	0.0292494	0.1648	-3.61885
O75592	MYCBP2	PMA:SMES:AR02	-0.236953	13.0436	-2.39716	0.0293238	0.164965	-3.62108
P27824	CANX	PMA:SMES:AR02	-0.607295	18.4898	-2.39666	0.0293528	0.164965	-3.62194
O94782	USP1	PMA:SMES:AR02	-0.608054	15.4466	-2.39637	0.0293694	0.164965	-3.62244
P50579	METAP2	PMA:SMES:AR02	-0.38908	13.0226	-2.39585	0.0293999	0.164966	-3.62335
P22033	MMUT	PMA:SMES:AR02	-0.593298	12.589	-2.3942	0.0294957	0.165018	-3.6262
Q6IA17	SIGIRR	PMA:SMES:AR02	-0.523607	11.6865	-2.39414	0.0294992	0.165018	-3.6263
Q09328	MGAT5	PMA:SMES:AR02	-0.825603	10.9656	-2.39409	0.0295023	0.165018	-3.6264
Q8IUD2	ERC1	PMA:SMES:AR02	-0.368821	15.1142	-2.39361	0.0295301	0.165018	-3.62722
Q53FT3	HIKESHI	PMA:SMES:AR02	-0.409208	12.8635	-2.39271	0.0295832	0.165145	-3.62879
P07195	LDHB	PMA:SMES:AR02	-0.277548	19.101	-2.38974	0.0297576	0.165722	-3.63394
P52758	RIDA	PMA:SMES:AR02	-0.792078	10.8535	-2.38969	0.0297602	0.165722	-3.63402
P33947	KDELR2	PMA:SMES:AR02	-1.20363	10.2218	-2.38914	0.0297929	0.165722	-3.63498
Q15058	KIF14	PMA:SMES:AR02	-1.65114	12.5188	-2.38832	0.0298408	0.165722	-3.63639
O95822	MLYCD	PMA:SMES:AR02	-0.596318	11.2855	-2.38825	0.029845	0.165722	-3.63651
P30038	ALDH4A1	PMA:SMES:AR02	-0.273693	14.1719	-2.38785	0.0298689	0.165722	-3.63721
Q86WX3	RPS19BP1	PMA:SMES:AR02	-0.791658	12.4805	-2.38407	0.030093	0.166697	-3.64376
Q9BUH6	PAXX	PMA:SMES:AR02	-0.335003	14.613	-2.38378	0.0301099	0.166697	-3.64425
Q13596	SNX1	PMA:SMES:AR02	-0.446107	14.5661	-2.38334	0.0301363	0.166697	-3.64502
Q9Y616	IRAK3	PMA:SMES:AR02	-0.512395	12.7727	-2.38145	0.0302494	0.167078	-3.6483
Q99808	SLC29A1	PMA:SMES:AR02	0.985238	13.254	2.38116	0.0302664	0.167078	-3.64879
Q9NX47	MARCHF5	PMA:SMES:AR02	-0.650918	10.9537	-2.37995	0.0303387	0.167308	-3.65088
Q9UJX5	ANAPC4	PMA:SMES:AR02	-0.423107	12.1718	-2.3791	0.0303898	0.167416	-3.65235
O15131	KPNA5	PMA:SMES:AR02	-0.356386	13.7157	-2.37861	0.0304197	0.167416	-3.65321
P24928	POLR2A	PMA:SMES:AR02	-0.359329	13.2311	-2.37697	0.0305184	0.167535	-3.65605
Q9Y5A7	NUB1	PMA:SMES:AR02	-0.484097	12.8267	-2.37693	0.0305203	0.167535	-3.6561
P25787	PSMA2	PMA:SMES:AR02	-0.898987	15.1047	-2.37571	0.0305941	0.167535	-3.65821
Q562R1	ACTBL2	PMA:SMES:AR02	-1.10427	16.3387	-2.37538	0.030614	0.167535	-3.65878
P35613	BSG	PMA:SMES:AR02	0.671384	14.8857	2.37538	0.0306143	0.167535	-3.65879
Q9H2G2	SLK	PMA:SMES:AR02	-0.345379	16.0034	-2.37519	0.0306256	0.167535	-3.65912
Q709C8	VPS13C	PMA:SMES:AR02	-0.289005	13.1559	-2.37426	0.0306821	0.167675	-3.66073
P11117	ACP2	PMA:SMES:AR02	-0.333882	13.9173	-2.37295	0.0307615	0.167785	-3.66299
O00308	WWP2	PMA:SMES:AR02	-0.348139	13.3171	-2.37198	0.0308204	0.167785	-3.66466
Q659C4	LARP1B	PMA:SMES:AR02	-0.668788	12.0064	-2.37123	0.0308663	0.167785	-3.66597
Q5T013	HYI	PMA:SMES:AR02	-0.630098	11.8193	-2.37115	0.0308707	0.167785	-3.66609
Q9HAJ7	SAP30L	PMA:SMES:AR02	-0.929178	12.0739	-2.37097	0.030882	0.167785	-3.66641
Q13630	GFUS	PMA:SMES:AR02	-0.236077	15.0155	-2.37089	0.0308867	0.167785	-3.66654
Q9UPY3	DICER1	PMA:SMES:AR02	-0.528606	11.6101	-2.36977	0.0309551	0.167961	-3.66848
P08754	GNAI3	PMA:SMES:AR02	0.526249	15.9561	2.36935	0.0309806	0.167961	-3.6692
Q5HYI8	RABL3	PMA:SMES:AR02	-0.382454	12.7268	-2.3687	0.0310204	0.168009	-3.67032
Q8IYS1	PM20D2	PMA:SMES:AR02	-0.77772	10.9998	-2.36667	0.0311452	0.16842	-3.67383
Q01459	CTBS	PMA:SMES:AR02	-0.767509	13.8608	-2.36637	0.0311638	0.16842	-3.67436
Q9HCG8	CWC22	PMA:SMES:AR02	-0.635082	12.279	-2.36596	0.031189	0.16842	-3.67506
P09874	PARP1	PMA:SMES:AR02	-0.343511	14.1917	-2.36516	0.0312381	0.168453	-3.67644
O75400	PRPF40A	PMA:SMES:AR02	-0.603172	14.2127	-2.36485	0.0312568	0.168453	-3.67696
Q96FS4	SIPA1	PMA:SMES:AR02	-0.286024	16.0236	-2.36254	0.0313999	0.168834	-3.68096
Q9C0I4		PMA:SMES:AR02	-1.00774	11.4541	-2.36233	0.031413	0.168834	-3.68132
Q53GS9	USP39	PMA:SMES:AR02	-0.561493	13.5114	-2.36192	0.0314384	0.168834	-3.68203
Q8TDM6	DLG5	PMA:SMES:AR02	-0.961357	12.6609	-2.36171	0.0314513	0.168834	-3.68239
Q92604	LPGAT1	PMA:SMES:AR02	-0.310765	14.2535	-2.36084	0.0315055	0.168855	-3.68389
Q9C0K0	BCL11B	PMA:SMES:AR02	-0.645371	11.8516	-2.36065	0.0315171	0.168855	-3.68421
Q5JTH9	RRP12	PMA:SMES:AR02	-0.572588	11.1448	-2.35807	0.0316781	0.16941	-3.68867
Q9H3N1	TMX1	PMA:SMES:AR02	0.417441	14.5535	2.35799	0.0316829	0.16941	-3.6888
P17812	CTPS1	PMA:SMES:AR02	-0.301968	14.0444	-2.35693	0.0317487	0.169596	-3.69061
Q16658	FSCN1	PMA:SMES:AR02	-0.42645	11.4192	-2.35576	0.0318221	0.169673	-3.69263
P49589	CARS1	PMA:SMES:AR02	-0.266204	15.0084	-2.35571	0.0318253	0.169673	-3.69272
Q92990	GLMN	PMA:SMES:AR02	-0.362629	12.3038	-2.35471	0.0318883	0.169728	-3.69445
P26641	EEF1G	PMA:SMES:AR02	-0.286161	16.2393	-2.35456	0.0318979	0.169728	-3.69471
Q92636	NSMAF	PMA:SMES:AR02	-0.568292	11.4704	-2.35216	0.0320489	0.169851	-3.69884
Q70J99	UNC13D	PMA:SMES:AR02	-0.429887	16.0773	-2.35184	0.0320687	0.169851	-3.69938
Q9BVQ7	SPATA5L1	PMA:SMES:AR02	-0.348481	12.0779	-2.35179	0.0320723	0.169851	-3.69947
Q6UXV4	APOOL	PMA:SMES:AR02	-0.448843	12.3441	-2.35175	0.0320749	0.169851	-3.69955
P27694	RPA1	PMA:SMES:AR02	-0.27087	14.5014	-2.35172	0.0320767	0.169851	-3.69959
Q8IY67	RAVER1	PMA:SMES:AR02	-0.33372	13.1901	-2.35101	0.0321212	0.169921	-3.70081
P15144	ANPEP	PMA:SMES:AR02	-0.342204	16.6556	-2.35013	0.0321774	0.170054	-3.70233
Q8N3D4	EHBP1L1	PMA:SMES:AR02	-0.419057	12.6184	-2.34948	0.0322184	0.170106	-3.70345
P15848	ARSB	PMA:SMES:AR02	-0.360761	15.4013	-2.34808	0.0323074	0.170219	-3.70585
P61020	RAB5B	PMA:SMES:AR02	-0.270639	15.1878	-2.34797	0.0323143	0.170219	-3.70604
O94913	PCF11	PMA:SMES:AR02	-1.52141	17.4011	-2.34767	0.0323335	0.170219	-3.70656
Q9NPQ8	RIC8A	PMA:SMES:AR02	-0.295329	13.6657	-2.34567	0.0324612	0.170461	-3.71
P49368	CCT3	PMA:SMES:AR02	-0.203613	16.6498	-2.34513	0.0324954	0.170461	-3.71092
Q9UK45	LSM7	PMA:SMES:AR02	0.616869	14.7601	2.34496	0.0325064	0.170461	-3.71122
Q9BYI3	HYCC1	PMA:SMES:AR02	-0.805751	11.0434	-2.34476	0.0325194	0.170461	-3.71157
P06396	GSN	PMA:SMES:AR02	-0.276176	19.803	-2.3445	0.0325356	0.170461	-3.712
Q96Q11	TRNT1	PMA:SMES:AR02	-0.347912	13.4243	-2.34046	0.0327957	0.171658	-3.71895
Q00535	CDK5	PMA:SMES:AR02	-0.294837	13.8987	-2.33676	0.033035	0.172745	-3.7253
Q6IBS0	TWF2	PMA:SMES:AR02	-0.344746	15.9124	-2.33584	0.0330946	0.172891	-3.72687
Q6ZW49	PAXIP1	PMA:SMES:AR02	-0.569761	10.8483	-2.3344	0.0331884	0.173215	-3.72934
Q9UBD5	ORC3	PMA:SMES:AR02	0.754881	10.3392	2.3331	0.0332736	0.173494	-3.73158
P82979	SARNP	PMA:SMES:AR02	0.556135	15.2173	2.33243	0.033317	0.173512	-3.73272
O00291	HIP1	PMA:SMES:AR02	-0.248089	13.5183	-2.33134	0.0333885	0.173512	-3.73459
P83436	COG7	PMA:SMES:AR02	-0.4532	11.8275	-2.33084	0.0334212	0.173512	-3.73544
Q13315	ATM	PMA:SMES:AR02	-0.232152	13.8131	-2.33031	0.0334563	0.173512	-3.73636
Q9Y259	CHKB	PMA:SMES:AR02	-0.529842	13.0721	-2.33026	0.0334599	0.173512	-3.73645
O75882	ATRN	PMA:SMES:AR02	-0.898301	10.4458	-2.32993	0.0334815	0.173512	-3.73702
P57081	WDR4	PMA:SMES:AR02	-0.725231	12.6406	-2.32965	0.0334998	0.173512	-3.73749
P05362	ICAM1	PMA:SMES:AR02	-0.49382	12.7456	-2.32805	0.0336051	0.173837	-3.74023
P51580	TPMT	PMA:SMES:AR02	-0.627199	11.6992	-2.32773	0.0336263	0.173837	-3.74078
Q9UGI8	TES	PMA:SMES:AR02	-0.317512	15.0389	-2.32686	0.0336837	0.173969	-3.74227
Q29RF7	PDS5A	PMA:SMES:AR02	-0.252453	13.3503	-2.32538	0.0337817	0.17431	-3.7448
O15021	MAST4	PMA:SMES:AR02	-0.418946	15.6823	-2.32395	0.033877	0.174486	-3.74726
Q8NHH9	ATL2	PMA:SMES:AR02	-0.701849	11.2943	-2.3239	0.0338798	0.174486	-3.74733
Q9H7Z7	PTGES2	PMA:SMES:AR02	-0.427608	12.047	-2.32276	0.0339561	0.174644	-3.74929
Q9HB71	CACYBP	PMA:SMES:AR02	0.310052	14.9114	2.32193	0.0340115	0.174644	-3.75071
Q9UBB9	TFIP11	PMA:SMES:AR02	-0.419569	11.5122	-2.32167	0.0340284	0.174644	-3.75114
P28838	LAP3	PMA:SMES:AR02	-0.219719	14.4475	-2.32152	0.0340386	0.174644	-3.75141
Q86X52	CHSY1	PMA:SMES:AR02	-0.564313	11.514	-2.3194	0.0341804	0.175207	-3.75503
P11172	UMPS	PMA:SMES:AR02	-0.36181	13.177	-2.31858	0.0342354	0.175324	-3.75643
Q8N1K5	THEMIS	PMA:SMES:AR02	0.633798	15.3896	2.31786	0.034284	0.175332	-3.75767
Q00722	PLCB2	PMA:SMES:AR02	-0.256758	14.7013	-2.31756	0.0343045	0.175332	-3.75819
Q8WUA4	GTF3C2	PMA:SMES:AR02	0.568072	12.1434	2.31713	0.0343334	0.175332	-3.75892
P33527	ABCC1	PMA:SMES:AR02	-0.381856	16.8862	-2.3161	0.0344024	0.175427	-3.76067
O95782	AP2A1	PMA:SMES:AR02	-0.230249	15.3207	-2.31589	0.0344164	0.175427	-3.76103
O75794	CDC123	PMA:SMES:AR02	0.475294	13.0055	2.31391	0.0345506	0.175947	-3.76442
Q9NYL9	TMOD3	PMA:SMES:AR02	-0.303511	15.3688	-2.31331	0.034591	0.175988	-3.76544
Q9Y2A7	NCKAP1	PMA:SMES:AR02	1.04319	14.9625	2.31211	0.034673	0.176238	-3.7675
P61086	UBE2K	PMA:SMES:AR02	-0.301519	14.3138	-2.31164	0.0347047	0.176238	-3.7683
Q92794	KAT6A	PMA:SMES:AR02	-0.847711	10.175	-2.31108	0.0347429	0.176268	-3.76925
P25098	GRK2	PMA:SMES:AR02	-0.260398	16.1609	-2.31026	0.0347987	0.176387	-3.77065
Q13098	GPS1	PMA:SMES:AR02	-0.251455	14.405	-2.30808	0.0349476	0.176977	-3.77437
Q9Y2J8	PADI2	PMA:SMES:AR02	-0.785911	15.5702	-2.30755	0.0349838	0.176996	-3.77527
P35658	NUP214	PMA:SMES:AR02	-0.353225	13.2646	-2.30703	0.0350197	0.177014	-3.77617
Q9BSD7	NTPCR	PMA:SMES:AR02	-0.595574	12.3833	-2.30645	0.0350593	0.177049	-3.77715
Q10472	GALNT1	PMA:SMES:AR02	-0.336476	13.0024	-2.30548	0.0351263	0.177224	-3.77881
Q96L93	KIF16B	PMA:SMES:AR02	-0.359049	12.4635	-2.30472	0.0351786	0.177323	-3.78011
Q9H1A3	METTL9	PMA:SMES:AR02	0.847075	11.5471	2.30363	0.0352535	0.177537	-3.78196
P83111	LACTB	PMA:SMES:AR02	-0.601902	12.8666	-2.30128	0.0354162	0.178042	-3.78597
Q8NEZ4	KMT2C	PMA:SMES:AR02	-0.324359	14.8933	-2.30124	0.035419	0.178042	-3.78604
Q9NVZ3	NECAP2	PMA:SMES:AR02	0.274584	14.1081	2.30073	0.0354542	0.178054	-3.7869
P61106	RAB14	PMA:SMES:AR02	-0.480158	16.0304	-2.29927	0.0355555	0.178294	-3.78939
P60763	RAC3	PMA:SMES:AR02	-0.480585	11.5194	-2.2991	0.0355673	0.178294	-3.78968
Q00325	SLC25A3	PMA:SMES:AR02	-0.234665	16.8095	-2.29814	0.035634	0.178465	-3.79131
Q6PHR2	ULK3	PMA:SMES:AR02	-0.802597	11.442	-2.29642	0.0357543	0.178612	-3.79424
Q8N668	COMMD1	PMA:SMES:AR02	-0.614261	12.2733	-2.2957	0.0358046	0.178612	-3.79546
Q9NX58	LYAR	PMA:SMES:AR02	-0.758796	12.8189	-2.29528	0.0358344	0.178612	-3.79619
P17858	PFKL	PMA:SMES:AR02	-0.240037	16.3936	-2.29482	0.0358669	0.178612	-3.79697
Q8TAQ2	SMARCC2	PMA:SMES:AR02	-0.25838	14.8278	-2.2946	0.0358819	0.178612	-3.79734
Q9BUP3	HTATIP2	PMA:SMES:AR02	-0.311375	14.687	-2.29387	0.035933	0.178612	-3.79858
P61289	PSME3	PMA:SMES:AR02	-0.350387	13.9942	-2.29353	0.0359568	0.178612	-3.79915
O15258	RER1	PMA:SMES:AR02	0.623926	13.0649	2.29353	0.0359571	0.178612	-3.79916
Q8TCD5	NT5C	PMA:SMES:AR02	-0.820929	10.3393	-2.2932	0.0359806	0.178612	-3.79973
P49588	AARS1	PMA:SMES:AR02	0.263798	12.7513	2.29305	0.0359909	0.178612	-3.79998
O60942	RNGTT	PMA:SMES:AR02	-0.802924	10.3363	-2.29157	0.0360955	0.178829	-3.8025
P23443	RPS6KB1	PMA:SMES:AR02	0.721337	10.856	2.29015	0.0361954	0.178829	-3.80491
Q6UX71	PLXDC2	PMA:SMES:AR02	-1.53062	9.1957	-2.29001	0.0362054	0.178829	-3.80515
Q16873	LTC4S	PMA:SMES:AR02	-0.521472	14.636	-2.28979	0.0362211	0.178829	-3.80552
P08397	HMBS	PMA:SMES:AR02	-0.493699	11.8785	-2.28976	0.0362229	0.178829	-3.80557
P04150	NR3C1	PMA:SMES:AR02	-0.416307	12.1507	-2.28964	0.0362314	0.178829	-3.80577
Q9BWU0	SLC4A1AP	PMA:SMES:AR02	-0.362644	12.7663	-2.28909	0.0362704	0.17886	-3.80671
O95786	RIGI	PMA:SMES:AR02	-0.378543	13.9459	-2.28849	0.0363132	0.178909	-3.80773
P50897	PPT1	PMA:SMES:AR02	-0.907483	9.89519	-2.28775	0.0363654	0.179004	-3.80898
P35249	RFC4	PMA:SMES:AR02	0.436634	12.9092	2.28679	0.036434	0.17918	-3.81062
P19784	CSNK2A2	PMA:SMES:AR02	0.320451	13.2085	2.28586	0.0365002	0.179262	-3.8122
Q86VH2	KIF27	PMA:SMES:AR02	-0.781381	10.3909	-2.28485	0.036572	0.179262	-3.81391
P08631	HCK	PMA:SMES:AR02	-0.405498	15.7223	-2.28455	0.036594	0.179262	-3.81443
P46019	PHKA2	PMA:SMES:AR02	-0.264952	14.4889	-2.28431	0.0366111	0.179262	-3.81484
Q96LD8	SENP8	PMA:SMES:AR02	-0.865197	10.385	-2.28372	0.0366531	0.179262	-3.81583
Q8NHM5	KDM2B	PMA:SMES:AR02	-0.63376	13.3373	-2.28353	0.0366667	0.179262	-3.81616
Q12979	ABR	PMA:SMES:AR02	-0.344948	13.803	-2.28334	0.0366806	0.179262	-3.81649
Q32M88	PGGHG	PMA:SMES:AR02	-0.550023	11.4675	-2.28281	0.0367186	0.179287	-3.81739
Q6ZVK8	NUDT18	PMA:SMES:AR02	-0.437933	12.3338	-2.28221	0.0367613	0.179335	-3.8184
O95989	NUDT3	PMA:SMES:AR02	-0.291689	13.8138	-2.28075	0.0368665	0.179687	-3.82088
Q8NBF2	NHLRC2	PMA:SMES:AR02	-0.232167	13.6727	-2.27815	0.0370535	0.180325	-3.82528
Q14011	CIRBP	PMA:SMES:AR02	1.07987	12.5415	2.27783	0.0370772	0.180325	-3.82583
P27361	MAPK3	PMA:SMES:AR02	-0.218681	17.0265	-2.27756	0.0370965	0.180325	-3.82629
Q9NUX5	POT1	PMA:SMES:AR02	1.01937	10.4953	2.2771	0.0371301	0.180327	-3.82707
Q14469	HES1	PMA:SMES:AR02	-0.431325	14.5261	-2.27625	0.0371912	0.180363	-3.8285
O00746	NME4	PMA:SMES:AR02	-1.23108	10.8042	-2.27608	0.0372036	0.180363	-3.82879
P32314	FOXN2	PMA:SMES:AR02	-1.91898	14.2501	-2.27463	0.0373091	0.180714	-3.83125
P51398	DAP3	PMA:SMES:AR02	-0.354713	12.1543	-2.27227	0.0374811	0.181386	-3.83525
Q96GQ5	RUSF1	PMA:SMES:AR02	-0.313033	13.1782	-2.2717	0.0375234	0.181429	-3.83623
Q9NUP1	BLOC1S4	PMA:SMES:AR02	0.736938	12.771	2.27051	0.0376104	0.181584	-3.83824
Q13451	FKBP5	PMA:SMES:AR02	-0.390052	16.5969	-2.27035	0.0376219	0.181584	-3.8385
P22352	GPX3	PMA:SMES:AR02	-0.423417	11.3428	-2.2697	0.0376696	0.181653	-3.83961
Q9BTZ2	DHRS4	PMA:SMES:AR02	-0.724398	11.7454	-2.26775	0.0378131	0.18207	-3.84291
Q9NXR7	BABAM2	PMA:SMES:AR02	-0.534131	13.2829	-2.267	0.0378686	0.18207	-3.84418
Q99567	NUP88	PMA:SMES:AR02	-0.3074	13.5799	-2.26644	0.0379095	0.18207	-3.84512
Q5EBM0	CMPK2	PMA:SMES:AR02	-0.464057	12.2915	-2.26639	0.0379136	0.18207	-3.84521
Q9NR45	NANS	PMA:SMES:AR02	-0.376236	15.4817	-2.26626	0.037923	0.18207	-3.84543
P62834	RAP1A	PMA:SMES:AR02	-0.765897	15.0469	-2.26538	0.0379878	0.182221	-3.84691
Q9NRW1	RAB6B	PMA:SMES:AR02	1.10664	14.3043	2.2643	0.0380681	0.182316	-3.84874
Q8IU68	TMC8	PMA:SMES:AR02	-0.689806	12.8583	-2.26353	0.0381255	0.182316	-3.85005
P15121	AKR1B1	PMA:SMES:AR02	-0.482741	13.0803	-2.26326	0.0381453	0.182316	-3.8505
P23526	AHCY	PMA:SMES:AR02	-0.273818	16.7975	-2.26322	0.0381487	0.182316	-3.85058
Q92889	ERCC4	PMA:SMES:AR02	-1.18696	10.2977	-2.26286	0.0381747	0.182316	-3.85117
Q9H2H8	PPIL3	PMA:SMES:AR02	-0.365128	12.9124	-2.26194	0.0382435	0.182417	-3.85273
Q9H7N4	SCAF1	PMA:SMES:AR02	-1.08729	9.04777	-2.26168	0.0382627	0.182417	-3.85317
[truncated: 4,310 more rows]
