# Supplementary material for: Schistosoma immune evasion of NETosis is reversed by aryl hydantoin Ro 13-3978
Source: Research Square preprint supplement (doi:10.21203/rs.3.rs-7453538/v1), 2025-08-26
Supplement: Supplementary file 2 [file 59249ff1666cab65647a802c.xlsx]

## Sheet: INM_AR02
accession	gene_symbol	coef	logFC	AveExpr	t	P.Value	adj.P.Val	B
P18621	RPL17	INM:AR02	1.0114	14.2663	4.85045	0.000146127	0.173086	-0.538182
P25398	RPS12	INM:AR02	0.649158	14.524	4.68068	0.000209692	0.173086	-0.719658
P27816	MAP4	INM:AR02	0.692646	14.0826	4.61978	0.00023885	0.173086	-0.785884
Q9Y5Y6	ST14	INM:AR02	-0.697816	13.4323	-4.17832	0.000618797	0.336316	-1.28266
Q16873	LTC4S	INM:AR02	0.79174	13.9015	3.75846	0.00154349	0.550449	-1.77926
Q8IWZ3	ANKHD1	INM:AR02	1.16866	12.4994	3.6003	0.00217912	0.550449	-1.97119
Q96M27	PRRC1	INM:AR02	0.560585	11.5745	3.38578	0.00347567	0.550449	-2.23463
P43686	PSMC4	INM:AR02	-0.4374	15.3611	-3.38482	0.00348294	0.550449	-2.23581
O15085	ARHGEF11	INM:AR02	-0.891454	9.65088	-3.36766	0.00361519	0.550449	-2.25701
Q13153	PAK1	INM:AR02	0.615418	19.141	3.34344	0.00381029	0.550449	-2.28695
Q9NPI7	KRCC1	INM:AR02	-0.447697	17.3111	-3.28271	0.00434644	0.550449	-2.36213
P62841	RPS15	INM:AR02	0.623098	11.5147	3.28199	0.00435328	0.550449	-2.36303
Q99439	CNN2	INM:AR02	1.00873	12.9897	3.20936	0.00509388	0.550449	-2.45312
Q9Y2Z4	YARS2	INM:AR02	1.231	12.1392	3.16095	0.00565481	0.550449	-2.51322
P62280	RPS11	INM:AR02	0.746946	13.6048	3.1439	0.00586651	0.550449	-2.53441
Q14114	LRP8	INM:AR02	1.03887	17.7248	3.11388	0.0062583	0.550449	-2.57172
Q4AC94	C2CD3	INM:AR02	-0.763438	14.6282	-3.09683	0.00649209	0.550449	-2.59291
Q9Y263	PLAA	INM:AR02	-0.526314	12.4913	-3.07111	0.00686085	0.550449	-2.62487
Q9UHL4	DPP7	INM:AR02	-0.362831	14.2477	-3.06893	0.00689311	0.550449	-2.62759
A6NGU5		INM:AR02	0.85959	12.9426	3.06332	0.00697667	0.550449	-2.63457
P98175	RBM10	INM:AR02	0.581276	11.6605	3.05844	0.00705008	0.550449	-2.64063
Q92504	SLC39A7	INM:AR02	-0.750744	10.6176	-3.04354	0.00727896	0.550449	-2.65914
P47897	QARS1	INM:AR02	-0.458479	14.0859	-3.03611	0.00739584	0.550449	-2.66837
P13010	XRCC5	INM:AR02	0.341175	15.5246	2.99528	0.0080716	0.550449	-2.71912
Q06330	RBPJ	INM:AR02	-0.575881	13.1179	-2.99023	0.00815925	0.550449	-2.72539
Q13637	RAB32	INM:AR02	0.625008	13.9453	2.9678	0.00855982	0.550449	-2.75325
Q9NTI5	PDS5B	INM:AR02	-0.37608	13.2686	-2.96419	0.00862595	0.550449	-2.75773
Q9BZL4	PPP1R12C	INM:AR02	-0.460558	13.2553	-2.93555	0.00916934	0.550449	-2.79329
P42226	STAT6	INM:AR02	0.844728	12.5168	2.92693	0.00933938	0.550449	-2.80399
O95977	S1PR4	INM:AR02	-0.388106	14.9572	-2.89209	0.0100579	0.550449	-2.8472
P02768	ALB	INM:AR02	0.5898	16.4614	2.88999	0.0101029	0.550449	-2.84981
O43166	SIPA1L1	INM:AR02	-0.825752	12.7625	-2.87055	0.0105286	0.550449	-2.8739
P48426	PIP4K2A	INM:AR02	-0.425579	14.875	-2.86849	0.0105747	0.550449	-2.87645
Q8IZX4	TAF1L	INM:AR02	1.12343	18.8831	2.86066	0.0107517	0.550449	-2.88614
Q96I25	RBM17	INM:AR02	-0.385023	13.9091	-2.85037	0.0109888	0.550449	-2.89888
O00505	KPNA3	INM:AR02	-0.36873	15.9715	-2.84938	0.0110119	0.550449	-2.90011
Q03518	TAP1	INM:AR02	0.658062	13.1045	2.84636	0.0110826	0.550449	-2.90385
Q9Y3A6	TMED5	INM:AR02	-0.493376	12.0209	-2.834	0.0113764	0.550449	-2.91914
Q15365	PCBP1	INM:AR02	1.0732	14.5707	2.80379	0.0121268	0.550449	-2.95651
Q9NSK0	KLC4	INM:AR02	-0.796118	10.3296	-2.79731	0.0122938	0.550449	-2.96452
P78537	BLOC1S1	INM:AR02	-0.355091	12.9697	-2.79485	0.0123577	0.550449	-2.96755
P00352	ALDH1A1	INM:AR02	0.449362	12.3762	2.79458	0.0123646	0.550449	-2.96788
P25685	DNAJB1	INM:AR02	-0.444503	15.5519	-2.7867	0.012572	0.550449	-2.97762
P80723	BASP1	INM:AR02	0.539331	14.7245	2.78537	0.0126074	0.550449	-2.97926
P19823	ITIH2	INM:AR02	0.843508	13.8819	2.78413	0.0126404	0.550449	-2.98079
Q8IWB7	WDFY1	INM:AR02	-0.721803	11.0043	-2.77846	0.0127923	0.550449	-2.98779
P29375	KDM5A	INM:AR02	-0.418157	13.8653	-2.7733	0.012932	0.550449	-2.99415
Q07020	RPL18	INM:AR02	0.425622	12.8684	2.76937	0.0130396	0.550449	-2.999
Q13564	NAE1	INM:AR02	-0.491869	14.411	-2.76728	0.0130972	0.550449	-3.00158
P61769	B2M	INM:AR02	0.502434	12.9011	2.75571	0.01342	0.550449	-3.01585
Q7KZ85	SUPT6H	INM:AR02	0.523503	13.9058	2.74197	0.0138132	0.550449	-3.03278
P16219	ACADS	INM:AR02	0.363081	12.7957	2.74051	0.0138558	0.550449	-3.03459
Q53EU6	GPAT3	INM:AR02	0.637392	12.6406	2.73814	0.0139248	0.550449	-3.0375
Q96SB8	SMC6	INM:AR02	-0.534162	13.2566	-2.72893	0.0141968	0.550449	-3.04884
Q9H1E5	TMX4	INM:AR02	0.543039	15.0089	2.70714	0.0148606	0.550449	-3.07565
Q5THK1	PRR14L	INM:AR02	1.26796	13.9963	2.70168	0.0150315	0.550449	-3.08236
Q9HCE1	MOV10	INM:AR02	0.498818	12.2074	2.70162	0.0150332	0.550449	-3.08243
P36507	MAP2K2	INM:AR02	0.422599	15.2406	2.69375	0.0152829	0.550449	-3.0921
Q09028	RBBP4	INM:AR02	-0.499746	13.1075	-2.67594	0.0158629	0.550449	-3.11397
P06899	H2BC11	INM:AR02	0.419502	20.0331	2.64618	0.0168787	0.550449	-3.15043
P62263	RPS14	INM:AR02	0.545466	13.2447	2.63345	0.0173322	0.550449	-3.16601
Q8TCU6	PREX1	INM:AR02	0.65589	13.2788	2.62789	0.0175339	0.550449	-3.17281
Q8TC56	GARIN3	INM:AR02	-0.52007	11.4692	-2.61883	0.0178673	0.550449	-3.18388
Q7Z3B4	NUP54	INM:AR02	0.961217	14.2702	2.61508	0.0180072	0.550449	-3.18847
O60888	CUTA	INM:AR02	0.603384	13.0386	2.60771	0.0182847	0.550449	-3.19746
Q9NRA2	SLC17A5	INM:AR02	-0.366011	14.8179	-2.59996	0.018581	0.550449	-3.20691
P07477	PRSS1	INM:AR02	0.480001	19.4846	2.59812	0.0186519	0.550449	-3.20915
P51153	RAB13	INM:AR02	0.380612	15.7585	2.59126	0.0189192	0.550449	-3.21752
O43760	SYNGR2	INM:AR02	0.603926	12.9437	2.57615	0.0195206	0.550449	-3.23593
Q9UQC2	GAB2	INM:AR02	0.782566	14.3069	2.57215	0.0196827	0.550449	-3.2408
P04839	CYBB	INM:AR02	0.621785	14.9218	2.56934	0.0197976	0.550449	-3.24422
Q96GX9	APIP	INM:AR02	-0.338081	14.3392	-2.56095	0.0201439	0.550449	-3.25442
Q13177	PAK2	INM:AR02	0.372208	13.5108	2.55981	0.0201911	0.550449	-3.2558
P45974	USP5	INM:AR02	0.436778	16.3339	2.55845	0.0202479	0.550449	-3.25745
P14543	NID1	INM:AR02	0.394853	15.1695	2.54754	0.0207091	0.550449	-3.27071
P46779	RPL28	INM:AR02	0.422283	13.8	2.53834	0.0211059	0.550449	-3.28188
P45880	VDAC2	INM:AR02	1.04715	11.8204	2.53828	0.0211083	0.550449	-3.28194
Q9H773	DCTPP1	INM:AR02	-0.33636	14.1298	-2.53688	0.0211691	0.550449	-3.28364
Q6P5R6	RPL22L1	INM:AR02	0.455842	15.6158	2.53046	0.0214509	0.550449	-3.29142
Q8NFA0	USP32	INM:AR02	-0.53012	11.5824	-2.52957	0.0214903	0.550449	-3.2925
Q8N201	INTS1	INM:AR02	-0.31923	17.4639	-2.5249	0.0216982	0.550449	-3.29817
P51809	VAMP7	INM:AR02	0.372193	14.4195	2.51193	0.0222847	0.550449	-3.31387
P43034	PAFAH1B1	INM:AR02	-0.508765	14.4309	-2.50649	0.0225351	0.550449	-3.32045
Q96IX5	ATP5MK	INM:AR02	0.57499	12.9358	2.49844	0.0229102	0.550449	-3.33017
Q8WXI2	CNKSR2	INM:AR02	-0.458828	14.6756	-2.49826	0.0229189	0.550449	-3.33039
Q5SR53		INM:AR02	0.789908	13.297	2.49619	0.0230164	0.550449	-3.33289
Q92804	TAF15	INM:AR02	0.712897	13.005	2.49095	0.0232652	0.550449	-3.33922
Q15125	EBP	INM:AR02	-0.453784	13.6434	-2.48257	0.0236682	0.550449	-3.34933
Q6UW68	TMEM205	INM:AR02	-0.356313	12.8809	-2.47555	0.0240103	0.550449	-3.35778
Q99704	DOK1	INM:AR02	0.410307	12.9909	2.46758	0.0244053	0.550449	-3.36739
Q13555	CAMK2G	INM:AR02	-0.458706	12.6464	-2.46624	0.0244721	0.550449	-3.369
Q96SZ5	ADO	INM:AR02	-0.546696	13.5431	-2.45936	0.0248187	0.550449	-3.37728
Q8TBY0	RBM46	INM:AR02	-0.425763	15.8088	-2.45539	0.0250207	0.550449	-3.38205
Q9NY12	GAR1	INM:AR02	0.307225	15.9603	2.45096	0.0252478	0.550449	-3.38738
Q9H082	RAB33B	INM:AR02	0.497267	14.1535	2.44466	0.0255744	0.550449	-3.39494
Q86YP4	GATAD2A	INM:AR02	0.486586	12.4304	2.4432	0.0256507	0.550449	-3.3967
P23396	RPS3	INM:AR02	0.314439	15.436	2.44114	0.0257586	0.550449	-3.39917
P39019	RPS19	INM:AR02	0.380732	13.6426	2.43899	0.0258716	0.550449	-3.40175
Q9HBR0	SLC38A10	INM:AR02	-0.368626	13.3843	-2.43511	0.026077	0.550449	-3.40641
Q9H4A4	RNPEP	INM:AR02	-0.477607	14.9253	-2.43414	0.0261288	0.550449	-3.40757
P15848	ARSB	INM:AR02	-0.377452	14.6137	-2.42664	0.0265304	0.550449	-3.41656
P35573	AGL	INM:AR02	-0.430187	11.7402	-2.42544	0.0265955	0.550449	-3.418
O75367	MACROH2A1	INM:AR02	0.598811	15.3997	2.42147	0.0268111	0.550449	-3.42276
Q9UL36	ZNF236	INM:AR02	0.63377	13.2202	2.41855	0.0269706	0.550449	-3.42625
P15153	RAC2	INM:AR02	0.523887	16.8365	2.41552	0.0271371	0.550449	-3.42987
O60763	USO1	INM:AR02	0.42015	13.3021	2.41445	0.0271963	0.550449	-3.43115
Q9NTJ3	SMC4	INM:AR02	-0.626453	14.7088	-2.40831	0.0275376	0.550449	-3.4385
P62851	RPS25	INM:AR02	0.592364	14.7853	2.40587	0.0276739	0.550449	-3.44141
Q9UJW0	DCTN4	INM:AR02	-0.517364	13.3648	-2.40407	0.0277753	0.550449	-3.44356
Q9BWH2	FUNDC2	INM:AR02	0.347039	13.2088	2.39668	0.0281946	0.550449	-3.45238
O75064	DENND4B	INM:AR02	0.557567	12.2974	2.39072	0.028537	0.550449	-3.45949
Q99735	MGST2	INM:AR02	0.507501	15.9852	2.38998	0.0285803	0.550449	-3.46038
Q96QK1	VPS35	INM:AR02	-0.442841	14.2697	-2.38944	0.0286112	0.550449	-3.46102
P62266	RPS23	INM:AR02	0.430219	13.9963	2.38334	0.0289669	0.551633	-3.4683
Q9Y6B7	AP4B1	INM:AR02	-0.417096	14.0001	-2.37852	0.0292507	0.551633	-3.47404
Q13393	PLD1	INM:AR02	0.573995	9.63661	2.36703	0.0299376	0.551633	-3.4877
P46781	RPS9	INM:AR02	0.677925	15.457	2.36235	0.030222	0.551633	-3.49327
O00712	NFIB	INM:AR02	0.450466	18.5227	2.36015	0.0303561	0.551633	-3.49588
Q9UMS4	PRPF19	INM:AR02	-0.491271	13.9542	-2.35576	0.030626	0.551633	-3.50109
P04075	ALDOA	INM:AR02	0.669645	17.2633	2.35411	0.0307283	0.551633	-3.50305
Q9H9B4	SFXN1	INM:AR02	-0.392054	14.0642	-2.35092	0.0309264	0.551633	-3.50683
Q9Y5S8	NOX1	INM:AR02	0.531533	12.351	2.35044	0.0309564	0.551633	-3.50741
Q92522	H1-10	INM:AR02	0.581038	13.7896	2.3449	0.0313037	0.553286	-3.51397
P32121	ARRB2	INM:AR02	0.406742	16.463	2.33232	0.0321062	0.555867	-3.52887
Q9HB07		INM:AR02	-0.354902	11.9595	-2.32869	0.0323411	0.555867	-3.53316
P30049	ATP5F1D	INM:AR02	0.515298	14.9592	2.32804	0.0323835	0.555867	-3.53394
O75340	PDCD6	INM:AR02	0.514592	13.0579	2.31753	0.0330739	0.555867	-3.54635
Q9HDC9	APMAP	INM:AR02	0.700985	18.6958	2.31579	0.0331895	0.555867	-3.5484
P62750	RPL23A	INM:AR02	0.289975	12.9985	2.31273	0.0333935	0.555867	-3.55201
Q05639	EEF1A2	INM:AR02	0.630239	17.1062	2.30889	0.0336518	0.555867	-3.55654
P35232	PHB1	INM:AR02	0.483119	15.9998	2.30804	0.0337092	0.555867	-3.55755
Q5JPF3		INM:AR02	0.614737	16.6876	2.30742	0.0337509	0.555867	-3.55827
Q9GZP4	PITHD1	INM:AR02	-0.380436	13.2406	-2.30091	0.0341939	0.55893	-3.56595
Q15080	NCF4	INM:AR02	-0.433643	14.0261	-2.29588	0.0345395	0.559808	-3.57186
Q96ST2	IWS1	INM:AR02	-0.355714	12.6464	-2.29197	0.0348106	0.559808	-3.57646
Q9H0Q0	CYRIA	INM:AR02	0.415459	13.6942	2.28588	0.0352363	0.559808	-3.58361
O14773	TPP1	INM:AR02	0.355633	15.8884	2.28278	0.0354557	0.559808	-3.58726
P27105	STOM	INM:AR02	0.360639	16.0481	2.28165	0.0355352	0.559808	-3.58858
Q6NXT6	TAPT1	INM:AR02	0.479362	11.5986	2.27142	0.0362677	0.566202	-3.60058
Q9Y673	ALG5	INM:AR02	0.533465	12.6279	2.26346	0.0368471	0.566202	-3.6099
Q86X76	NIT1	INM:AR02	-0.376474	12.541	-2.26268	0.0369049	0.566202	-3.61082
P29692	EEF1D	INM:AR02	0.267461	15.271	2.25972	0.0371229	0.566202	-3.61429
P32942	ICAM3	INM:AR02	0.766045	12.4358	2.25507	0.0374675	0.566202	-3.61972
Q6IAA8	LAMTOR1	INM:AR02	0.323714	15.8423	2.25459	0.0375037	0.566202	-3.62029
Q9UBV8	PEF1	INM:AR02	0.339014	14.3331	2.23791	0.0387661	0.570127	-3.63975
Q9H334	FOXP1	INM:AR02	0.67758	16.8498	2.23791	0.0387662	0.570127	-3.63975
P42331	ARHGAP25	INM:AR02	-0.299595	15.3475	-2.22713	0.0396032	0.570127	-3.6523
P52565	ARHGDIA	INM:AR02	0.388908	14.2178	2.22556	0.0397263	0.570127	-3.65413
P31153	MAT2A	INM:AR02	-0.440549	12.0119	-2.22484	0.0397833	0.570127	-3.65497
P13073	COX4I1	INM:AR02	0.53449	11.8043	2.2234	0.0398967	0.570127	-3.65664
O75844	ZMPSTE24	INM:AR02	0.904704	12.5435	2.22285	0.0399399	0.570127	-3.65728
Q96I99	SUCLG2	INM:AR02	0.440533	12.3578	2.21781	0.0403404	0.570127	-3.66314
P09493	TPM1	INM:AR02	-0.551745	13.5883	-2.20491	0.0413812	0.570127	-3.6781
P29401	TKT	INM:AR02	-0.302519	16.0034	-2.20295	0.0415418	0.570127	-3.68037
Q8TD84	DSCAML1	INM:AR02	-0.246727	14.9857	-2.2024	0.0415867	0.570127	-3.68101
P48047	ATP5PO	INM:AR02	0.355608	14.1081	2.20194	0.0416245	0.570127	-3.68154
Q9UJS0	SLC25A13	INM:AR02	0.70199	13.8419	2.1982	0.0419327	0.570127	-3.68587
Q16563	SYPL1	INM:AR02	0.628016	12.5876	2.19017	0.0426008	0.570127	-3.69515
O96019	ACTL6A	INM:AR02	0.433158	14.0986	2.18785	0.0427957	0.570127	-3.69783
O14974	PPP1R12A	INM:AR02	-0.416381	12.506	-2.18729	0.0428432	0.570127	-3.69848
Q96FW1	OTUB1	INM:AR02	-0.394455	13.4209	-2.18708	0.0428605	0.570127	-3.69872
Q9NX00	TMEM160	INM:AR02	-0.256351	15.1198	-2.18135	0.0433463	0.570127	-3.70533
Q06210	GFPT1	INM:AR02	-0.270026	14.2901	-2.17762	0.0436656	0.570127	-3.70964
O60264	SMARCA5	INM:AR02	0.275367	13.7955	2.17707	0.0437122	0.570127	-3.71027
Q14457	BECN1	INM:AR02	-0.39883	11.728	-2.17695	0.0437226	0.570127	-3.71041
P36578	RPL4	INM:AR02	0.349042	13.4769	2.17329	0.0440385	0.570127	-3.71463
Q13363	CTBP1	INM:AR02	0.366599	13.1793	2.1726	0.0440976	0.570127	-3.71542
Q969J3	BORCS5	INM:AR02	0.300459	13.4991	2.16965	0.0443544	0.570127	-3.71882
Q96N11	INTS15	INM:AR02	0.814347	11.5673	2.16875	0.0444325	0.570127	-3.71986
P51608	MECP2	INM:AR02	0.729378	11.4873	2.16704	0.0445822	0.570127	-3.72183
P10153	RNASE2	INM:AR02	-0.33902	12.3921	-2.16384	0.0448623	0.570354	-3.7255
Q15172	PPP2R5A	INM:AR02	-0.352799	14.4273	-2.15599	0.0455578	0.572749	-3.73453
Q9C0J8	WDR33	INM:AR02	-0.386006	13.8786	-2.15577	0.0455776	0.572749	-3.73478
Q15366	PCBP2	INM:AR02	0.490962	13.1521	2.14273	0.0467541	0.581131	-3.74972
P33316	DUT	INM:AR02	0.849518	11.6036	2.14246	0.0467792	0.581131	-3.75004
P08133	ANXA6	INM:AR02	0.308242	17.8387	2.1355	0.0474187	0.583512	-3.75799
P01023	A2M	INM:AR02	0.470253	15.5865	2.13454	0.0475077	0.583512	-3.75909
Q8N423		INM:AR02	0.331261	13.6144	2.13004	0.0479272	0.583847	-3.76424
Q14624	ITIH4	INM:AR02	0.32915	13.9439	2.12828	0.0480913	0.583847	-3.76625
O75955	FLOT1	INM:AR02	0.431163	12.9763	2.1221	0.0486735	0.583847	-3.7733
Q9BQA1	WDR77	INM:AR02	-0.354499	14.1577	-2.11969	0.0489029	0.583847	-3.77605
Q2KHT3	CLEC16A	INM:AR02	0.370505	15.5907	2.11806	0.0490586	0.583847	-3.77791
Q96G03	PGM2	INM:AR02	-0.439362	14.418	-2.11714	0.0491463	0.583847	-3.77896
P18124	RPL7	INM:AR02	0.293156	15.9636	2.11401	0.0494464	0.58422	-3.78252
P11215	ITGAM	INM:AR02	0.33444	17.3839	2.10703	0.0501218	0.588345	-3.79046
Q7Z7H5	TMED4	INM:AR02	0.514687	13.4786	2.10482	0.0503368	0.588345	-3.79297
Q15269	PWP2	INM:AR02	-0.275655	14.417	-2.09698	0.0511084	0.589682	-3.80187
O60437	PPL	INM:AR02	-0.319668	14.8177	-2.09568	0.051237	0.589682	-3.80334
Q07864	POLE	INM:AR02	0.247237	15.1907	2.0954	0.0512649	0.589682	-3.80366
P13807	GYS1	INM:AR02	-0.850353	11.5988	-2.07237	0.0536005	0.610297	-3.82972
Q9Y6D5	ARFGEF2	INM:AR02	-0.404998	14.0911	-2.07219	0.0536185	0.610297	-3.82991
Q02818	NUCB1	INM:AR02	-0.255808	15.0792	-2.06478	0.0543906	0.612062	-3.83827
Q00839	HNRNPU	INM:AR02	-0.362321	12.6153	-2.06474	0.0543946	0.612062	-3.83831
Q96CW5	TUBGCP3	INM:AR02	0.425261	11.9716	2.06262	0.0546182	0.612062	-3.84071
Q9UHD2	TBK1	INM:AR02	0.534454	12.6853	2.05655	0.0552603	0.616082	-3.84754
Q8NI08	NCOA7	INM:AR02	0.395879	11.4509	2.05242	0.0557012	0.617829	-3.85218
O60306	AQR	INM:AR02	0.466933	12.1406	2.0409	0.0569477	0.627298	-3.8651
Q6ZUJ8	PIK3AP1	INM:AR02	-0.448537	10.7245	-2.03525	0.0575681	0.627298	-3.87142
Q15417	CNN3	INM:AR02	0.362465	14.8582	2.03407	0.0576983	0.627298	-3.87274
Q684P5	RAP1GAP2	INM:AR02	0.387001	12.659	2.03398	0.0577091	0.627298	-3.87285
O75886	STAM2	INM:AR02	0.379933	12.1891	2.02715	0.0584688	0.63109	-3.88048
P49327	FASN	INM:AR02	-0.347556	13.5526	-2.02353	0.0588755	0.63109	-3.88452
Q8IV53	DENND1C	INM:AR02	-0.648062	14.3054	-2.0186	0.0594332	0.63109	-3.89002
Q9UQ80	PA2G4	INM:AR02	0.451787	13.9814	2.01628	0.0596967	0.63109	-3.8926
Q92667	AKAP1	INM:AR02	-0.278031	13.7147	-2.01421	0.0599338	0.63109	-3.89491
Q9UHG3	PCYOX1	INM:AR02	0.332066	14.2927	2.00849	0.0605922	0.63109	-3.90127
P28676	GCA	INM:AR02	0.513236	15.7472	2.00602	0.0608779	0.63109	-3.90402
Q6RW13	AGTRAP	INM:AR02	0.402438	13.258	2.00542	0.060948	0.63109	-3.90469
Q15084	PDIA6	INM:AR02	0.381372	13.301	2.00521	0.0609718	0.63109	-3.90491
Q9BZ95	NSD3	INM:AR02	0.402267	13.888	2.00214	0.0613302	0.63109	-3.90833
O95466	FMNL1	INM:AR02	0.268073	14.4323	2.00182	0.061367	0.63109	-3.90868
Q7Z392	TRAPPC11	INM:AR02	-0.49942	11.3534	-2.00033	0.0615414	0.63109	-3.91033
P26599	PTBP1	INM:AR02	-0.478032	15.5539	-1.99063	0.062689	0.631843	-3.92109
Q9BW19	KIFC1	INM:AR02	0.354774	16.0578	1.98459	0.063412	0.631843	-3.92776
P62491	RAB11A	INM:AR02	0.283425	14.9342	1.98377	0.0635115	0.631843	-3.92867
P21108	PRPS1L1	INM:AR02	0.694422	11.9099	1.97968	0.0640065	0.631843	-3.93319
Q96EZ8	MCRS1	INM:AR02	-0.356441	10.8796	-1.97955	0.0640225	0.631843	-3.93334
Q08722	CD47	INM:AR02	0.507469	14.7107	1.97587	0.0644705	0.631843	-3.93739
P10515	DLAT	INM:AR02	-0.462027	14.0121	-1.97543	0.0645246	0.631843	-3.93788
Q6DD87	ZNF787	INM:AR02	0.240455	13.1623	1.97479	0.064603	0.631843	-3.93859
P30613	PKLR	INM:AR02	-0.419889	18.9983	-1.97285	0.0648401	0.631843	-3.94072
O94880	PHF14	INM:AR02	0.609532	12.8819	1.9724	0.0648966	0.631843	-3.94122
O15143	ARPC1B	INM:AR02	0.429561	14.6641	1.96899	0.0653164	0.631843	-3.94497
Q9Y606	PUS1	INM:AR02	0.314866	13.3069	1.9671	0.0655508	0.631843	-3.94706
Q13200	PSMD2	INM:AR02	0.324813	12.9812	1.96245	0.0661296	0.631843	-3.95216
P61011	SRP54	INM:AR02	0.6864	12.6039	1.95966	0.0664801	0.631843	-3.95524
O43464	HTRA2	INM:AR02	-0.229354	14.826	-1.95923	0.0665344	0.631843	-3.95571
Q13303	KCNAB2	INM:AR02	-0.421842	12.7844	-1.95686	0.066832	0.631843	-3.9583
P42356	PI4KA	INM:AR02	0.417277	11.7943	1.95442	0.0671413	0.631843	-3.96099
P17252	PRKCA	INM:AR02	-0.349578	12.6366	-1.9531	0.0673082	0.631843	-3.96243
Q6P1A2	LPCAT3	INM:AR02	0.566108	12.8024	1.95039	0.0676544	0.631843	-3.96541
Q13505	MTX1	INM:AR02	0.429058	11.0635	1.95023	0.0676741	0.631843	-3.96558
P48960	ADGRE5	INM:AR02	0.615848	11.3251	1.94771	0.0679967	0.631843	-3.96834
Q9H2G2	SLK	INM:AR02	0.271693	12.8968	1.94762	0.0680089	0.631843	-3.96844
P35580	MYH10	INM:AR02	0.469622	17.6552	1.94393	0.0684826	0.632718	-3.97247
Q9Y450	HBS1L	INM:AR02	-0.361683	11.731	-1.93731	0.0693426	0.632718	-3.97971
Q9NRY4	ARHGAP35	INM:AR02	0.602744	15.6612	1.93635	0.0694677	0.632718	-3.98076
Q86UX7	FERMT3	INM:AR02	0.409995	15.2193	1.9361	0.0695001	0.632718	-3.98103
P51648	ALDH3A2	INM:AR02	0.336831	13.2455	1.93566	0.0695582	0.632718	-3.98151
P46063	RECQL	INM:AR02	-0.317077	13.3363	-1.92914	0.0704159	0.636289	-3.98862
Q14232	EIF2B1	INM:AR02	-0.333838	12.159	-1.92669	0.0707406	0.636289	-3.99129
P38646	HSPA9	INM:AR02	0.287879	14.0572	1.92603	0.0708289	0.636289	-3.99201
Q6P2Q9	PRPF8	INM:AR02	0.219811	14.4697	1.92148	0.071436	0.639102	-3.99696
Q9UHX1	PUF60	INM:AR02	0.435068	13.7362	1.91421	0.0724155	0.640499	-4.00485
Q8TD55	PLEKHO2	INM:AR02	-0.324853	14.0427	-1.9113	0.0728118	0.640499	-4.00801
P08758	ANXA5	INM:AR02	-0.282405	14.9321	-1.90933	0.0730809	0.640499	-4.01015
Q86VM9	ZC3H18	INM:AR02	0.521761	14.7823	1.90853	0.0731899	0.640499	-4.01101
Q29RF7	PDS5A	INM:AR02	-0.210316	14.7558	-1.9083	0.073222	0.640499	-4.01127
Q8NE86	MCU	INM:AR02	0.289177	13.1845	1.90729	0.0733598	0.640499	-4.01236
O43615	TIMM44	INM:AR02	0.442829	11.3094	1.90449	0.0737448	0.641285	-4.01539
P55060	CSE1L	INM:AR02	0.346034	12.9037	1.89244	0.0754238	0.653272	-4.02841
Q96MG7	NSMCE3	INM:AR02	-0.530282	10.6226	-1.88854	0.0759739	0.655425	-4.03261
P36543	ATP6V1E1	INM:AR02	-0.338731	13.4385	-1.88432	0.0765733	0.657986	-4.03716
Q14141	SEPTIN6	INM:AR02	0.637121	10.7692	1.88055	0.0771125	0.66001	-4.04121
Q14C86	GAPVD1	INM:AR02	0.273663	13.1332	1.8738	0.0780867	0.664961	-4.04847
P17612	PRKACA	INM:AR02	-0.379991	12.7561	-1.86818	0.0789044	0.664961	-4.05448
P02788	LTF	INM:AR02	0.289952	20.9997	1.86815	0.0789099	0.664961	-4.05452
P02042	HBD	INM:AR02	0.27834	17.3163	1.86782	0.0789575	0.664961	-4.05487
Q49A26	GLYR1	INM:AR02	0.452839	12.2373	1.86324	0.0796308	0.664961	-4.05977
O60313	OPA1	INM:AR02	0.416718	12.9809	1.86232	0.0797667	0.664961	-4.06075
P46379	BAG6	INM:AR02	0.322413	12.9762	1.86188	0.0798321	0.664961	-4.06123
Q12923	PTPN13	INM:AR02	0.465051	11.4721	1.85942	0.0801963	0.665446	-4.06385
Q9P0M6	MACROH2A2	INM:AR02	0.650659	12.5575	1.85234	0.0812545	0.669383	-4.07141
Q9H1U4	MEGF9	INM:AR02	0.272071	13.8129	1.84921	0.081726	0.669383	-4.07475
Q8WUW1	BRK1	INM:AR02	0.387266	13.0512	1.83637	0.0836848	0.669383	-4.08839
P56134	ATP5MF	INM:AR02	0.637999	10.9528	1.83397	0.0840562	0.669383	-4.09094
P16104	H2AX	INM:AR02	0.518574	21.3454	1.83345	0.0841362	0.669383	-4.09149
Q9UNF0	PACSIN2	INM:AR02	-0.240753	17.0818	-1.83345	0.0841363	0.669383	-4.09149
P46459	NSF	INM:AR02	0.264421	14.8373	1.83255	0.084276	0.669383	-4.09245
Q15029	EFTUD2	INM:AR02	0.244054	13.0325	1.83181	0.0843917	0.669383	-4.09324
P49588	AARS1	INM:AR02	-0.355364	12.1666	-1.82902	0.0848255	0.669383	-4.09619
O60476	MAN1A2	INM:AR02	-0.434371	14.9488	-1.82885	0.0848524	0.669383	-4.09637
P20340	RAB6A	INM:AR02	0.275774	14.2989	1.82828	0.0849415	0.669383	-4.09697
Q6VN20	RANBP10	INM:AR02	-0.389217	12.4164	-1.82735	0.0850862	0.669383	-4.09795
P42025	ACTR1B	INM:AR02	0.377016	12.8064	1.82499	0.0854561	0.669383	-4.10045
Q52LJ0	FAM98B	INM:AR02	-0.348142	14.6375	-1.8243	0.0855643	0.669383	-4.10118
Q9BYM8	RBCK1	INM:AR02	-0.493793	12.2896	-1.82238	0.0858677	0.669383	-4.10321
Q13627	DYRK1A	INM:AR02	-0.279537	13.7781	-1.8194	0.0863382	0.669383	-4.10635
Q9Y4A5	TRRAP	INM:AR02	0.781781	13.2923	1.8178	0.086593	0.669383	-4.10805
P17213	BPI	INM:AR02	0.295014	19.7592	1.81638	0.0868187	0.669383	-4.10954
Q92556	ELMO1	INM:AR02	0.511303	11.9365	1.81468	0.0870888	0.669383	-4.11133
P60174	TPI1	INM:AR02	0.461321	14.3102	1.81415	0.0871741	0.669383	-4.11189
Q9BZJ0	CRNKL1	INM:AR02	-0.358419	14.4843	-1.81408	0.0871857	0.669383	-4.11197
Q6UXV4	APOOL	INM:AR02	0.321181	12.5411	1.81169	0.0875684	0.669383	-4.11449
P19474	TRIM21	INM:AR02	-0.302156	12.9444	-1.81054	0.0877526	0.669383	-4.11569
A6QL63	ABTB3	INM:AR02	-0.408642	13.0535	-1.80812	0.0881433	0.670012	-4.11824
P40926	MDH2	INM:AR02	-0.206941	17.4144	-1.80249	0.0890548	0.672599	-4.12415
P49589	CARS1	INM:AR02	-0.401644	12.8923	-1.8022	0.0891024	0.672599	-4.12446
O60826	CCDC22	INM:AR02	0.269712	12.7647	1.7956	0.0901847	0.67378	-4.13139
P55061	TMBIM6	INM:AR02	-0.305765	12.7985	-1.79469	0.0903347	0.67378	-4.13234
Q16831	UPP1	INM:AR02	-0.602901	12.382	-1.7874	0.0915431	0.67378	-4.13996
P04406	GAPDH	INM:AR02	0.269141	13.2453	1.78429	0.0920627	0.67378	-4.1432
P12270	TPR	INM:AR02	0.288369	12.7756	1.78406	0.092102	0.67378	-4.14345
Q15018	ABRAXAS2	INM:AR02	0.266103	12.3243	1.78329	0.092232	0.67378	-4.14426
Q96LC7	SIGLEC10	INM:AR02	0.222941	12.7959	1.78152	0.0925292	0.67378	-4.1461
P14174	MIF	INM:AR02	0.526174	15.4203	1.78064	0.092677	0.67378	-4.14702
P54136	RARS1	INM:AR02	-0.217352	13.691	-1.77979	0.0928202	0.67378	-4.1479
Q14254	FLOT2	INM:AR02	0.501602	13.8907	1.77962	0.0928492	0.67378	-4.14808
Q92820	GGH	INM:AR02	0.323202	12.5451	1.77916	0.0929277	0.67378	-4.14856
P62244	RPS15A	INM:AR02	0.487339	14.3148	1.77886	0.092978	0.67378	-4.14887
P11766	ADH5	INM:AR02	-0.544548	15.1181	-1.77428	0.0937553	0.677156	-4.15364
Q9Y6D9	MAD1L1	INM:AR02	0.36495	13.3515	1.76877	0.094698	0.681701	-4.15937
Q9NXG0	CNTLN	INM:AR02	-0.268231	13.2269	-1.76563	0.0952398	0.683338	-4.16263
Q9BS26	ERP44	INM:AR02	0.393138	12.1484	1.76165	0.0959287	0.684307	-4.16675
Q9NYU1	UGGT2	INM:AR02	0.689367	13.0829	1.76119	0.0960085	0.684307	-4.16723
Q15286	RAB35	INM:AR02	0.257604	18.1255	1.75834	0.0965062	0.684307	-4.17018
Q15691	MAPRE1	INM:AR02	-0.525348	13.4838	-1.75761	0.096634	0.684307	-4.17094
Q9UKF6	CPSF3	INM:AR02	0.384648	14.7735	1.74966	0.0980324	0.691144	-4.17915
Q86X10	RALGAPB	INM:AR02	-0.225302	14.1592	-1.74603	0.0986774	0.691144	-4.18289
P11310	ACADM	INM:AR02	0.560625	14.2061	1.74335	0.0991554	0.691144	-4.18565
Q8WXG6	MADD	INM:AR02	-0.354332	13.0332	-1.74329	0.0991665	0.691144	-4.18572
P22307	SCP2	INM:AR02	0.418891	13.6432	1.7418	0.0994328	0.691144	-4.18725
P60660	MYL6	INM:AR02	0.543245	16.7966	1.74078	0.0996163	0.691144	-4.1883
O00170	AIP	INM:AR02	-0.352843	12.5055	-1.73928	0.0998871	0.691144	-4.18985
Q6IQ23	PLEKHA7	INM:AR02	-0.240954	15.0718	-1.7378	0.100153	0.691144	-4.19136
Q96BM9	ARL8A	INM:AR02	-0.246505	13.3739	-1.73471	0.100712	0.691144	-4.19454
P42566	EPS15	INM:AR02	-0.280193	13.3578	-1.73434	0.100779	0.691144	-4.19492
Q9Y3R5	DOP1B	INM:AR02	0.575652	10.4676	1.72819	0.1019	0.696635	-4.20122
Q9NSD9	FARSB	INM:AR02	0.401719	13.5024	1.72591	0.102319	0.697307	-4.20356
Q9C0C9	UBE2O	INM:AR02	-0.430933	13.0569	-1.72087	0.103248	0.697963	-4.20871
P68363	TUBA1B	INM:AR02	0.606466	15.8544	1.72024	0.103365	0.697963	-4.20935
Q8N1F7	NUP93	INM:AR02	0.214011	13.1213	1.72017	0.103378	0.697963	-4.20942
Q9BSJ8	ESYT1	INM:AR02	0.432862	12.3497	1.71832	0.103723	0.698123	-4.21132
Q08380	LGALS3BP	INM:AR02	-0.326858	11.5278	-1.71651	0.104059	0.698226	-4.21316
Q8N511	TMEM199	INM:AR02	-0.286566	12.4199	-1.71439	0.104456	0.698732	-4.21533
P31943	HNRNPH1	INM:AR02	0.263967	17.1354	1.70906	0.105458	0.703269	-4.22076
Q8WWM7	ATXN2L	INM:AR02	-0.351203	10.7767	-1.69851	0.107464	0.708583	-4.23146
O00160	MYO1F	INM:AR02	0.263095	14.3338	1.69787	0.107587	0.708583	-4.23212
Q8TF01	PNISR	INM:AR02	0.366785	14.2755	1.69667	0.107818	0.708583	-4.23334
P10809	HSPD1	INM:AR02	0.256526	15.5989	1.69334	0.108459	0.708583	-4.2367
P52209	PGD	INM:AR02	-0.314143	17.9022	-1.69253	0.108616	0.708583	-4.23752
Q9BY43	CHMP4A	INM:AR02	0.27558	12.5381	1.6875	0.109593	0.708583	-4.2426
Q6NZI2	CAVIN1	INM:AR02	0.348387	11.7335	1.68574	0.109937	0.708583	-4.24438
P61421	ATP6V0D1	INM:AR02	0.29684	14.9574	1.68277	0.110519	0.708583	-4.24737
Q00325	SLC25A3	INM:AR02	0.326726	14.2836	1.68027	0.111012	0.708583	-4.24989
Q9Y6Y8	SEC23IP	INM:AR02	0.467942	10.7858	1.67965	0.111134	0.708583	-4.25052
Q16181	SEPTIN7	INM:AR02	-0.209172	15.0518	-1.67925	0.111213	0.708583	-4.25092
Q13576	IQGAP2	INM:AR02	0.258166	15.4979	1.67782	0.111496	0.708583	-4.25236
Q06323	PSME1	INM:AR02	0.531659	13.5641	1.6767	0.111717	0.708583	-4.25348
O60513	B4GALT4	INM:AR02	-0.476568	15.7065	-1.67622	0.111814	0.708583	-4.25397
P62424	RPL7A	INM:AR02	0.370382	15.1605	1.67407	0.112241	0.708583	-4.25613
P25786	PSMA1	INM:AR02	-0.230204	15.3509	-1.6728	0.112493	0.708583	-4.2574
P04920	SLC4A2	INM:AR02	0.363381	11.8738	1.67181	0.112691	0.708583	-4.25839
Q8N2G8	GHDC	INM:AR02	0.564351	11.2437	1.67171	0.112711	0.708583	-4.2585
P34932	HSPA4	INM:AR02	-0.375469	12.9203	-1.67129	0.112796	0.708583	-4.25892
Q9NTX5	ECHDC1	INM:AR02	-0.331092	14.5793	-1.67062	0.112929	0.708583	-4.25959
Q8WZ42	TTN	INM:AR02	0.747793	14.8874	1.66977	0.1131	0.708583	-4.26044
Q02252	ALDH6A1	INM:AR02	-0.226158	13.299	-1.66572	0.113914	0.709436	-4.2645
P61326	MAGOH	INM:AR02	-0.371514	14.7947	-1.66545	0.113969	0.709436	-4.26478
Q9BVN2	RUSC1	INM:AR02	-0.56703	11.0596	-1.66423	0.114215	0.709436	-4.266
Q92841	DDX17	INM:AR02	0.22083	14.1199	1.6604	0.114992	0.710214	-4.26983
Q9HD33	MRPL47	INM:AR02	-0.495062	12.6108	-1.65844	0.11539	0.710214	-4.27178
Q02878	RPL6	INM:AR02	0.25246	16.7158	1.65596	0.115896	0.710214	-4.27425
P08590	MYL3	INM:AR02	0.46915	14.7938	1.6551	0.116073	0.710214	-4.27512
Q99698	LYST	INM:AR02	0.256416	12.0905	1.65424	0.116249	0.710214	-4.27597
P53597	SUCLG1	INM:AR02	0.372935	11.836	1.65249	0.116608	0.710214	-4.27772
Q2M2I8	AAK1	INM:AR02	0.385559	12.2948	1.6519	0.116731	0.710214	-4.27831
P09917	ALOX5	INM:AR02	0.419802	13.1658	1.65024	0.117072	0.710214	-4.27996
Q9Y5P4	CERT1	INM:AR02	-0.299411	12.4049	-1.64882	0.117366	0.710214	-4.28138
P31930	UQCRC1	INM:AR02	0.309463	13.9617	1.64765	0.117607	0.710214	-4.28253
Q9UNZ2	NSFL1C	INM:AR02	0.278648	12.8782	1.64417	0.11833	0.711914	-4.28599
P18085	ARF4	INM:AR02	-0.359965	13.7854	-1.64315	0.118543	0.711914	-4.28701
Q9NP72	RAB18	INM:AR02	0.188259	16.8458	1.64141	0.118907	0.712134	-4.28874
P01859		INM:AR02	-0.288891	14.6298	-1.63975	0.119254	0.712248	-4.29038
P52597	HNRNPF	INM:AR02	-0.206825	12.9584	-1.63704	0.119825	0.713697	-4.29307
Q9Y4I1	MYO5A	INM:AR02	0.429365	17.1611	1.62953	0.121414	0.719935	-4.30049
P17676	CEBPB	INM:AR02	-0.24744	12.8632	-1.62896	0.121535	0.719935	-4.30105
P13637	ATP1A3	INM:AR02	0.255432	13.8476	1.62105	0.123232	0.726919	-4.30885
P49257	LMAN1	INM:AR02	0.267966	14.5281	1.61811	0.123866	0.726919	-4.31174
Q9NSE4	IARS2	INM:AR02	0.251162	12.6595	1.61796	0.1239	0.726919	-4.31189
Q96FZ7	CHMP6	INM:AR02	0.493335	11.6379	1.61726	0.124051	0.726919	-4.31258
P48739	PITPNB	INM:AR02	-0.217921	13.2903	-1.61298	0.124982	0.729507	-4.31678
Q9UKK3	PARP4	INM:AR02	0.228151	13.2757	1.61215	0.125164	0.729507	-4.3176
Q8NC96	NECAP1	INM:AR02	0.391313	13.8516	1.6102	0.12559	0.730033	-4.31951
P14678	SNRPB	INM:AR02	-0.475812	12.9761	-1.60456	0.126832	0.732289	-4.32503
Q9Y6K0	CEPT1	INM:AR02	0.330895	12.8699	1.60436	0.126875	0.732289	-4.32522
Q6IS14	EIF5AL1	INM:AR02	-0.672485	13.3969	-1.60238	0.127313	0.732289	-4.32716
P07900	HSP90AA1	INM:AR02	-0.232056	16.6698	-1.5974	0.128422	0.732289	-4.33202
Q15181	PPA1	INM:AR02	-0.235685	13.4219	-1.597	0.12851	0.732289	-4.33241
Q08211	DHX9	INM:AR02	0.242282	13.7368	1.5945	0.12907	0.732289	-4.33484
Q4V328	GRIPAP1	INM:AR02	-0.360361	11.581	-1.59151	0.129743	0.732289	-4.33775
Q9Y570	PPME1	INM:AR02	0.279683	12.67	1.59138	0.129772	0.732289	-4.33788
Q9NQG5	RPRD1B	INM:AR02	-0.349289	12.8608	-1.59131	0.129788	0.732289	-4.33795
P20701	ITGAL	INM:AR02	0.167252	16.7096	1.59066	0.129935	0.732289	-4.33858
O00754	MAN2B1	INM:AR02	-0.303702	12.3176	-1.58943	0.130213	0.732289	-4.33978
P60953	CDC42	INM:AR02	-0.352444	16.2293	-1.58748	0.130653	0.732289	-4.34167
O94973	AP2A2	INM:AR02	0.401116	12.3735	1.58713	0.130732	0.732289	-4.34201
O14656	TOR1A	INM:AR02	0.335492	11.8632	1.58613	0.13096	0.732289	-4.34298
Q8NBS9	TXNDC5	INM:AR02	-0.199357	13.793	-1.58155	0.132003	0.732289	-4.34742
A6NC98	CCDC88B	INM:AR02	0.259909	14.0753	1.58051	0.132241	0.732289	-4.34843
P51553	IDH3G	INM:AR02	-0.534906	10.7921	-1.57885	0.132621	0.732289	-4.35003
P50416	CPT1A	INM:AR02	0.331852	12.1977	1.57591	0.133299	0.732289	-4.35288
P60709	ACTB	INM:AR02	0.381334	20.5397	1.5732	0.133922	0.732289	-4.35549
Q9Y394	DHRS7	INM:AR02	0.473198	14.807	1.57085	0.134468	0.732289	-4.35776
O75165	DNAJC13	INM:AR02	0.245098	13.7552	1.56834	0.135051	0.732289	-4.36018
O15347	HMGB3	INM:AR02	-0.245265	16.806	-1.56642	0.1355	0.732289	-4.36203
P62318	SNRPD3	INM:AR02	-0.295174	16.6824	-1.56604	0.135588	0.732289	-4.36239
Q9Y225	RNF24	INM:AR02	-0.287432	13.0292	-1.56573	0.135662	0.732289	-4.36269
P81605	DCD	INM:AR02	0.625418	14.5693	1.56516	0.135794	0.732289	-4.36324
O75676	RPS6KA4	INM:AR02	0.452675	11.6759	1.56494	0.135846	0.732289	-4.36345
O43399	TPD52L2	INM:AR02	0.395218	13.8161	1.56368	0.136141	0.732289	-4.36466
P06865	HEXA	INM:AR02	-0.202273	14.9044	-1.56327	0.136238	0.732289	-4.36506
P19338	NCL	INM:AR02	0.524603	13.0244	1.56029	0.136938	0.732289	-4.36792
Q9P0P0	RNF181	INM:AR02	0.329841	11.905	1.55927	0.137179	0.732289	-4.3689
Q12768	WASHC5	INM:AR02	0.241539	12.3011	1.55537	0.138103	0.732289	-4.37264
P22415	USF1	INM:AR02	0.54043	11.7543	1.55465	0.138275	0.732289	-4.37333
O60563	CCNT1	INM:AR02	0.263679	14.7638	1.55398	0.138434	0.732289	-4.37397
P08697	SERPINF2	INM:AR02	0.315692	14.0867	1.55305	0.138655	0.732289	-4.37486
P11586	MTHFD1	INM:AR02	-0.232701	15.9162	-1.54824	0.139805	0.732289	-4.37946
Q9UBR2	CTSZ	INM:AR02	-0.190941	15.4978	-1.54746	0.139992	0.732289	-4.3802
Q8WYP5	AHCTF1	INM:AR02	-0.309816	11.4384	-1.54691	0.140124	0.732289	-4.38073
Q8TDZ2	MICAL1	INM:AR02	0.275215	13.1	1.54199	0.141311	0.732289	-4.38542
Q14005	IL16	INM:AR02	0.20185	16.3973	1.54182	0.141352	0.732289	-4.38558
Q16698	DECR1	INM:AR02	0.241645	15.5853	1.53997	0.1418	0.732289	-4.38734
Q5VSL9	STRIP1	INM:AR02	0.367609	12.5257	1.53845	0.142168	0.732289	-4.38878
Q9UKM9	RALY	INM:AR02	0.354829	14.9712	1.53793	0.142295	0.732289	-4.38927
P38606	ATP6V1A	INM:AR02	0.322399	14.3574	1.5372	0.142473	0.732289	-4.38997
Q53GQ0	HSD17B12	INM:AR02	0.312186	12.6959	1.53627	0.142702	0.732289	-4.39086
Q9Y2X7	GIT1	INM:AR02	-0.279796	12.6368	-1.53529	0.14294	0.732289	-4.39179
Q9NX76	CMTM6	INM:AR02	0.455627	11.0997	1.53496	0.143022	0.732289	-4.3921
P67809	YBX1	INM:AR02	-0.5279	11.1894	-1.53314	0.143465	0.732289	-4.39382
Q15120	PDK3	INM:AR02	0.26646	14.3991	1.53312	0.143471	0.732289	-4.39384
P78332	RBM6	INM:AR02	-0.5852	13.0247	-1.53292	0.143521	0.732289	-4.39404
Q96RK4	BBS4	INM:AR02	0.635489	12.7532	1.53181	0.143793	0.732289	-4.39509
P61201	COPS2	INM:AR02	0.27069	12.6592	1.5312	0.143942	0.732289	-4.39566
Q8NAV1	PRPF38A	INM:AR02	0.330153	13.4377	1.53035	0.144151	0.732289	-4.39647
P10768	ESD	INM:AR02	-0.270818	12.466	-1.52949	0.144364	0.732289	-4.39729
Q709C8	VPS13C	INM:AR02	-0.292631	12.7701	-1.52908	0.144465	0.732289	-4.39768
P62191	PSMC1	INM:AR02	-0.245265	14.4444	-1.52622	0.145171	0.732289	-4.40038
Q13451	FKBP5	INM:AR02	-0.373119	13.2632	-1.5258	0.145275	0.732289	-4.40078
Q8IUR0	TRAPPC5	INM:AR02	0.428282	11.5643	1.52511	0.145447	0.732289	-4.40143
Q6ZTN6	ANKRD13D	INM:AR02	0.225924	13.0053	1.52221	0.146166	0.732289	-4.40417
Q96RT1	ERBIN	INM:AR02	0.311892	12.8372	1.52066	0.146552	0.732289	-4.40563
Q9NP81	SARS2	INM:AR02	0.328401	10.6596	1.5205	0.146593	0.732289	-4.40578
Q9BRR9	ARHGAP9	INM:AR02	-0.162343	14.8679	-1.52041	0.146615	0.732289	-4.40587
Q5TCX8	MAP3K21	INM:AR02	0.583325	12.9186	1.51855	0.14708	0.732289	-4.40762
Q7L5N7	LPCAT2	INM:AR02	0.245247	15.5382	1.51808	0.147199	0.732289	-4.40807
Q9Y487	ATP6V0A2	INM:AR02	-0.265176	12.3282	-1.51569	0.147797	0.733585	-4.41031
Q9NX63	CHCHD3	INM:AR02	0.311152	12.4263	1.51399	0.148224	0.734028	-4.41191
Q96S44	TP53RK	INM:AR02	0.37254	13.0271	1.51078	0.149035	0.735046	-4.41493
P53396	ACLY	INM:AR02	-0.196926	14.1886	-1.50821	0.149686	0.735046	-4.41734
Q9NS86	LANCL2	INM:AR02	-0.299727	11.857	-1.50785	0.149779	0.735046	-4.41768
Q13315	ATM	INM:AR02	0.259538	12.2376	1.50784	0.149782	0.735046	-4.41769
P61163	ACTR1A	INM:AR02	0.238829	15.6856	1.50125	0.151464	0.74021	-4.42386
P46776	RPL27A	INM:AR02	0.565232	12.2855	1.50007	0.151766	0.74021	-4.42496
P17568	NDUFB7	INM:AR02	0.32201	13.113	1.49914	0.152005	0.74021	-4.42583
P15735	PHKG2	INM:AR02	0.159258	15.3031	1.4984	0.152196	0.74021	-4.42653
Q9UFN0	NIPSNAP3A	INM:AR02	0.254818	13.1793	1.49655	0.152672	0.740869	-4.42825
P41252	IARS1	INM:AR02	0.29121	13.6994	1.49144	0.153996	0.744312	-4.43301
P11142	HSPA8	INM:AR02	0.190274	16.5266	1.49084	0.154152	0.744312	-4.43357
Q92616	GCN1	INM:AR02	-0.209302	12.7972	-1.48763	0.15499	0.744312	-4.43656
Q9H3S1	SEMA4A	INM:AR02	0.455838	10.513	1.48641	0.155308	0.744312	-4.43769
P06576	ATP5F1B	INM:AR02	0.244011	16.8423	1.48456	0.155793	0.744312	-4.4394
Q14289	PTK2B	INM:AR02	0.426377	12.6457	1.4841	0.155914	0.744312	-4.43983
Q96T60	PNKP	INM:AR02	-0.232437	13.3947	-1.48123	0.156669	0.744312	-4.44249
Q15370	ELOB	INM:AR02	0.28362	12.7622	1.4812	0.156677	0.744312	-4.44252
Q9C037	TRIM4	INM:AR02	0.247316	13.4341	1.48118	0.156684	0.744312	-4.44254
P0DMV8	HSPA1A	INM:AR02	0.192065	17.0323	1.48022	0.156935	0.744312	-4.44342
P51003	PAPOLA	INM:AR02	0.337915	11.9723	1.47555	0.158174	0.744312	-4.44775
P55735	SEC13	INM:AR02	0.198533	12.5868	1.47519	0.15827	0.744312	-4.44808
P05109	S100A8	INM:AR02	0.331946	17.7442	1.47438	0.158484	0.744312	-4.44883
Q7KYR7	BTN2A1	INM:AR02	0.326093	14.3606	1.4732	0.1588	0.744312	-4.44992
P34897	SHMT2	INM:AR02	-0.427863	12.5529	-1.47319	0.158802	0.744312	-4.44993
Q16891	IMMT	INM:AR02	-0.204166	14.1146	-1.47281	0.158903	0.744312	-4.45028
Q9Y296	TRAPPC4	INM:AR02	0.308672	13.0087	1.47132	0.159301	0.744312	-4.45165
P56537	EIF6	INM:AR02	0.291493	12.5731	1.47014	0.159616	0.744312	-4.45274
Q96GG9	DCUN1D1	INM:AR02	-0.262751	13.294	-1.46913	0.159887	0.744312	-4.45367
Q14BN4	SLMAP	INM:AR02	0.33364	13.1013	1.46035	0.162257	0.751305	-4.46174
O00410	IPO5	INM:AR02	0.270388	13.0369	1.4603	0.16227	0.751305	-4.46178
P61916	NPC2	INM:AR02	0.268115	13.5089	1.45807	0.162876	0.751305	-4.46383
Q7KZI7	MARK2	INM:AR02	-0.30205	12.8025	-1.45806	0.162879	0.751305	-4.46384
Q0VD83	APOBR	INM:AR02	0.331139	14.4412	1.45496	0.163725	0.751305	-4.46668
Q12874	SF3A3	INM:AR02	0.303434	14.0557	1.45437	0.163886	0.751305	-4.46721
Q8WUH2	TGFBRAP1	INM:AR02	0.272465	12.3649	1.45173	0.16461	0.751305	-4.46963
Q9NVA2	SEPTIN11	INM:AR02	-0.169674	14.4801	-1.45149	0.164675	0.751305	-4.46984
P48506	GCLC	INM:AR02	-0.269652	12.6514	-1.45114	0.164771	0.751305	-4.47016
P60866	RPS20	INM:AR02	0.340172	11.0034	1.45025	0.165018	0.751305	-4.47098
O43566	RGS14	INM:AR02	0.248799	13.1896	1.44652	0.166046	0.751305	-4.47438
Q9H9H4	VPS37B	INM:AR02	0.381074	15.2296	1.44635	0.166094	0.751305	-4.47454
Q96BY6	DOCK10	INM:AR02	-0.22836	13.2493	-1.44335	0.166924	0.751305	-4.47726
Q9C0E2	XPO4	INM:AR02	-0.28059	12.9047	-1.44301	0.167019	0.751305	-4.47757
O43175	PHGDH	INM:AR02	0.261194	13.1354	1.441	0.16758	0.751305	-4.4794
P53634	CTSC	INM:AR02	-0.25174	14.094	-1.44068	0.167669	0.751305	-4.47969
P78324	SIRPA	INM:AR02	0.308151	14.1874	1.44055	0.167704	0.751305	-4.47981
Q5TBA9	FRY	INM:AR02	0.349436	12.7351	1.43912	0.168105	0.751305	-4.48111
Q8NHH9	ATL2	INM:AR02	0.280361	12.6685	1.43825	0.168348	0.751305	-4.4819
Q3V6T2	CCDC88A	INM:AR02	-0.33672	11.8553	-1.4369	0.168725	0.751305	-4.48312
Q9Y618	NCOR2	INM:AR02	0.305196	14.386	1.43657	0.168818	0.751305	-4.48343
Q5SSJ5	HP1BP3	INM:AR02	0.294711	16.4787	1.43595	0.168992	0.751305	-4.48399
P60228	EIF3E	INM:AR02	0.27161	13.5683	1.43111	0.170354	0.751373	-4.48837
Q2TB10	ZNF800	INM:AR02	0.511478	13.1633	1.43105	0.170371	0.751373	-4.48842
O75449	KATNA1	INM:AR02	-0.230055	14.0431	-1.43073	0.170461	0.751373	-4.48871
Q9Y224	RTRAF	INM:AR02	0.326996	13.0471	1.43068	0.170475	0.751373	-4.48875
Q1KMD3	HNRNPUL2	INM:AR02	-0.211191	13.5611	-1.42976	0.170735	0.751373	-4.48958
Q9H9A6	LRRC40	INM:AR02	-0.208355	12.0411	-1.42805	0.171221	0.751663	-4.49113
P62873	GNB1	INM:AR02	0.313488	15.6877	1.42709	0.171493	0.751663	-4.49199
P43155	CRAT	INM:AR02	0.281777	12.2866	1.42453	0.172222	0.753343	-4.49431
Q9NYU2	UGGT1	INM:AR02	-0.1577	15.3301	-1.42182	0.172995	0.755203	-4.49674
C4AMC7		INM:AR02	-0.24339	12.3736	-1.41785	0.174133	0.755287	-4.50031
O95169	NDUFB8	INM:AR02	-0.224797	13.8933	-1.41683	0.174429	0.755287	-4.50123
Q16401	PSMD5	INM:AR02	0.225163	12.5537	1.41602	0.174661	0.755287	-4.50196
Q9BYK8	HELZ2	INM:AR02	-0.22216	17.748	-1.41571	0.17475	0.755287	-4.50223
Q9NS15	LTBP3	INM:AR02	0.448486	11.3994	1.41411	0.175212	0.755287	-4.50367
Q8NHP8	PLBD2	INM:AR02	-0.223902	12.8074	-1.41355	0.175373	0.755287	-4.50417
Q02978	SLC25A11	INM:AR02	0.356841	14.0947	1.4133	0.175446	0.755287	-4.50439
Q14676	MDC1	INM:AR02	-0.33422	13.6051	-1.41081	0.176169	0.7569	-4.50663
P11413	G6PD	INM:AR02	-0.153916	17.147	-1.40908	0.176672	0.757563	-4.50817
Q13164	MAPK7	INM:AR02	-0.176046	13.8048	-1.40773	0.177065	0.757755	-4.50938
Q9UL46	PSME2	INM:AR02	-0.200887	15.162	-1.40391	0.178179	0.761025	-4.51278
P54577	YARS1	INM:AR02	-0.192331	13.792	-1.40018	0.179277	0.761463	-4.51611
Q8TCT9	HM13	INM:AR02	-0.209963	14.9226	-1.40005	0.179315	0.761463	-4.51623
Q9UKT5	FBXO4	INM:AR02	0.377796	11.697	1.39999	0.179333	0.761463	-4.51628
P56211	ARPP19	INM:AR02	-0.39117	11.8996	-1.39732	0.180121	0.763302	-4.51866
Q92878	RAD50	INM:AR02	-0.215864	12.8209	-1.39528	0.180723	0.763302	-4.52046
P49591	SARS1	INM:AR02	0.280469	12.298	1.39496	0.180819	0.763302	-4.52075
O43252	PAPSS1	INM:AR02	-0.289363	12.1666	-1.39139	0.181879	0.763918	-4.52391
Q8IUE6	H2AC21	INM:AR02	0.536354	14.0594	1.39125	0.181921	0.763918	-4.52404
Q8NFU5	IPMK	INM:AR02	-0.328191	15.5853	-1.39092	0.182019	0.763918	-4.52433
O15117	FYB1	INM:AR02	-0.236526	13.2816	-1.38873	0.182674	0.764092	-4.52627
P08567	PLEK	INM:AR02	-0.201754	14.0503	-1.38781	0.182949	0.764092	-4.52708
P30048	PRDX3	INM:AR02	0.309208	14.669	1.38681	0.183248	0.764092	-4.52797
Q9Y3I0	RTCB	INM:AR02	-0.258584	14.5209	-1.38608	0.183466	0.764092	-4.52861
Q96C19	EFHD2	INM:AR02	0.221756	16.8921	1.38385	0.184138	0.764507	-4.53058
P36871	PGM1	INM:AR02	-0.441526	12.1114	-1.38341	0.184269	0.764507	-4.53097
Q9Y512	SAMM50	INM:AR02	0.300633	12.2267	1.38152	0.184838	0.765405	-4.53263
O00471	EXOC5	INM:AR02	-0.357094	12.4751	-1.37775	0.18598	0.768669	-4.53595
Q9HC38	GLOD4	INM:AR02	-0.248568	11.1835	-1.37611	0.186478	0.769265	-4.5374
P16278	GLB1	INM:AR02	-0.194966	14.0946	-1.37337	0.187312	0.769872	-4.5398
Q6P0Q8	MAST2	INM:AR02	-0.323838	14.5429	-1.37253	0.187568	0.769872	-4.54054
P11169	SLC2A3	INM:AR02	0.201874	15.4082	1.37214	0.187687	0.769872	-4.54088
Q12904	AIMP1	INM:AR02	-0.384553	11.3094	-1.36971	0.188431	0.770944	-4.54301
Q96AE4	FUBP1	INM:AR02	-0.165445	17.5777	-1.36885	0.188696	0.770944	-4.54377
O00291	HIP1	INM:AR02	-0.163345	13.9831	-1.36713	0.189224	0.770944	-4.54527
Q12800	TFCP2	INM:AR02	-0.159606	13.6411	-1.36666	0.189367	0.770944	-4.54568
Q96MX0	CMTM3	INM:AR02	-0.382134	11.3006	-1.36358	0.190319	0.773371	-4.54837
Q8N5Y2	MSL3	INM:AR02	-0.180605	12.6635	-1.35942	0.191607	0.775328	-4.552
O96011	PEX11B	INM:AR02	0.278064	12.6946	1.35903	0.191728	0.775328	-4.55234
Q96F24	NRBF2	INM:AR02	0.460639	13.0375	1.35857	0.19187	0.775328	-4.55273
P25815	S100P	INM:AR02	-0.176314	18.7926	-1.3568	0.192423	0.776118	-4.55428
Q8N9N7	LRRC57	INM:AR02	-0.155131	14.7639	-1.3544	0.193171	0.776136	-4.55636
Q9NWB6	ARGLU1	INM:AR02	0.517944	13.7184	1.35432	0.193195	0.776136	-4.55643
P41250	GARS1	INM:AR02	0.212931	13.8627	1.35335	0.193499	0.776136	-4.55727
P27635	RPL10	INM:AR02	0.243485	14.1069	1.35195	0.193939	0.77647	-4.55849
Q8NB16	MLKL	INM:AR02	0.346001	11.6969	1.34815	0.195133	0.778299	-4.56178
P19525	EIF2AK2	INM:AR02	-0.208562	12.0285	-1.3476	0.195307	0.778299	-4.56226
Q96RU3	FNBP1	INM:AR02	0.284048	11.9676	1.34708	0.19547	0.778299	-4.5627
Q99447	PCYT2	INM:AR02	-0.413705	12.9637	-1.34442	0.196312	0.778528	-4.565
Q7Z4W1	DCXR	INM:AR02	-0.170224	15.9099	-1.34279	0.196829	0.778528	-4.56641
P08246	ELANE	INM:AR02	-0.267339	20.5256	-1.34254	0.196908	0.778528	-4.56663
P10124	SRGN	INM:AR02	-0.382681	15.2102	-1.34099	0.197401	0.778528	-4.56796
Q13596	SNX1	INM:AR02	-0.226343	12.9019	-1.33853	0.198185	0.778528	-4.57008
Q8IU60	DCP2	INM:AR02	-0.340226	11.3225	-1.33715	0.198626	0.778528	-4.57127
Q9NUJ1	ABHD10	INM:AR02	0.244165	12.7686	1.33685	0.198723	0.778528	-4.57153
P23634	ATP2B4	INM:AR02	0.31265	13.0118	1.33631	0.198894	0.778528	-4.57199
P49792	RANBP2	INM:AR02	-0.207507	13.1952	-1.33586	0.199037	0.778528	-4.57238
P04114	APOB	INM:AR02	0.253014	13.8397	1.33557	0.19913	0.778528	-4.57263
Q96FN4	CPNE2	INM:AR02	0.427935	10.7474	1.33335	0.199845	0.778528	-4.57454
P16070	CD44	INM:AR02	0.195948	16.1855	1.33264	0.200071	0.778528	-4.57514
Q9H074	PAIP1	INM:AR02	-0.243025	13.1804	-1.3318	0.200342	0.778528	-4.57587
P55010	EIF5	INM:AR02	-0.284958	11.1275	-1.3308	0.200665	0.778528	-4.57673
Q9H9A5	CNOT10	INM:AR02	-0.266291	13.684	-1.32692	0.201917	0.778528	-4.58004
P02794	FTH1	INM:AR02	-0.197309	12.4001	-1.32655	0.202037	0.778528	-4.58036
Q7L2E3	DHX30	INM:AR02	-0.326627	11.058	-1.32537	0.20242	0.778528	-4.58137
Q8TD19	NEK9	INM:AR02	0.26247	11.6482	1.32229	0.203421	0.778528	-4.584
Q9NZ52	GGA3	INM:AR02	-0.426143	11.7389	-1.32095	0.203859	0.778528	-4.58514
Q96DT5	DNAH11	INM:AR02	-0.538203	16.7405	-1.31858	0.204634	0.778528	-4.58716
P00747	PLG	INM:AR02	0.275812	12.6859	1.31653	0.205305	0.778528	-4.5889
P49593	PPM1F	INM:AR02	-0.331568	12.0697	-1.31631	0.205376	0.778528	-4.58909
Q00722	PLCB2	INM:AR02	-0.238086	15.3794	-1.31615	0.205432	0.778528	-4.58923
P50747	HLCS	INM:AR02	0.250594	12.9721	1.3153	0.205709	0.778528	-4.58995
Q9NVP1	DDX18	INM:AR02	0.30506	12.1335	1.31484	0.205862	0.778528	-4.59034
P84103	SRSF3	INM:AR02	0.30075	15.2533	1.31471	0.205905	0.778528	-4.59045
O94903	PLPBP	INM:AR02	0.336833	11.9022	1.31463	0.205932	0.778528	-4.59052
P10606	COX5B	INM:AR02	0.184842	18.4294	1.31422	0.206066	0.778528	-4.59087
Q9UMX0	UBQLN1	INM:AR02	-0.303741	12.4526	-1.31064	0.207245	0.778528	-4.5939
Q4FZB7	KMT5B	INM:AR02	-0.457267	17.2886	-1.30872	0.207881	0.778528	-4.59553
P07686	HEXB	INM:AR02	0.201803	13.6433	1.3074	0.208319	0.778528	-4.59665
O14950	MYL12A	INM:AR02	-0.265405	17.3874	-1.30617	0.208729	0.778528	-4.59769
Q8NF91	SYNE1	INM:AR02	0.184689	14.7775	1.30613	0.20874	0.778528	-4.59772
Q9NPF4	OSGEP	INM:AR02	-0.242269	12.7469	-1.30564	0.208904	0.778528	-4.59813
Q8WWI5	SLC44A1	INM:AR02	0.226906	10.7673	1.30497	0.209127	0.778528	-4.5987
Q96QE3	ATAD5	INM:AR02	-0.377125	13.914	-1.30429	0.209353	0.778528	-4.59927
P09972	ALDOC	INM:AR02	0.192865	13.3132	1.30206	0.210099	0.778528	-4.60116
Q9BV20	MRI1	INM:AR02	0.384142	10.074	1.29927	0.211034	0.778528	-4.60351
P63010	AP2B1	INM:AR02	-0.172647	13.9251	-1.2973	0.211695	0.778528	-4.60516
P00558	PGK1	INM:AR02	-0.194682	13.7569	-1.2972	0.211729	0.778528	-4.60525
P25705	ATP5F1A	INM:AR02	0.247284	17.98	1.29703	0.211784	0.778528	-4.60539
Q16576	RBBP7	INM:AR02	-0.227798	13.1077	-1.2955	0.2123	0.778528	-4.60667
P21399	ACO1	INM:AR02	0.221789	13.9829	1.295	0.212469	0.778528	-4.60709
Q9UJU6	DBNL	INM:AR02	0.17136	13.4579	1.29486	0.212516	0.778528	-4.60721
Q6ZU69	SPATA31F1	INM:AR02	0.352073	13.971	1.29312	0.213102	0.778528	-4.60867
Q9Y2Q0	ATP8A1	INM:AR02	0.226918	13.721	1.29255	0.213296	0.778528	-4.60915
P61803	DAD1	INM:AR02	0.241757	15.9149	1.29156	0.213631	0.778528	-4.60998
P22314	UBA1	INM:AR02	-0.250933	13.6788	-1.2906	0.213957	0.778528	-4.61078
P02787	TF	INM:AR02	0.158911	13.6126	1.28986	0.214207	0.778528	-4.6114
Q6BDS2	BLTP3A	INM:AR02	0.181873	18.2771	1.28838	0.214712	0.778528	-4.61264
P80217	IFI35	INM:AR02	-0.152684	13.9531	-1.28782	0.214901	0.778528	-4.61311
P55265	ADAR	INM:AR02	0.185685	12.5181	1.28674	0.21527	0.778528	-4.61401
Q9UBR5	CKLF	INM:AR02	0.239078	15.1186	1.28668	0.215291	0.778528	-4.61407
Q9H061	TMEM126A	INM:AR02	-0.18743	13.6888	-1.2851	0.215829	0.778528	-4.61538
O75351	VPS4B	INM:AR02	0.355573	11.2846	1.28496	0.215875	0.778528	-4.6155
Q99986	VRK1	INM:AR02	0.505296	12.511	1.28485	0.215912	0.778528	-4.61559
Q9UBV2	SEL1L	INM:AR02	-0.319636	15.2901	-1.28477	0.21594	0.778528	-4.61565
Q8IYJ3	SYTL1	INM:AR02	-0.163298	15.3898	-1.28314	0.216498	0.77925	-4.61702
Q86UE4	MTDH	INM:AR02	-0.221747	13.3586	-1.28154	0.217047	0.779933	-4.61835
Q96HS1	PGAM5	INM:AR02	0.373988	12.8389	1.2778	0.218331	0.782681	-4.62146
Q68CP4	HGSNAT	INM:AR02	0.294321	12.5477	1.27722	0.218531	0.782681	-4.62194
O14818	PSMA7	INM:AR02	-0.380434	13.1267	-1.27536	0.219174	0.783692	-4.62349
Q8N6D5	ANKRD29	INM:AR02	0.316118	13.3028	1.27197	0.220348	0.786335	-4.6263
Q99961	SH3GL1	INM:AR02	-0.169868	14.4372	-1.27114	0.220637	0.786335	-4.62699
Q9Y266	NUDC	INM:AR02	-0.214827	12.2045	-1.26935	0.221258	0.787258	-4.62847
Q14012	CAMK1	INM:AR02	-0.273624	16.6994	-1.2683	0.221623	0.787268	-4.62933
Q93100	PHKB	INM:AR02	-0.149817	15.2834	-1.26705	0.22206	0.787534	-4.63037
Q9NYA4	MTMR4	INM:AR02	0.234899	13.607	1.2637	0.22323	0.787842	-4.63313
Q14103	HNRNPD	INM:AR02	0.370875	14.5851	1.26137	0.224049	0.787842	-4.63505
P45954	ACADSB	INM:AR02	-0.347185	10.2136	-1.26072	0.22428	0.787842	-4.63559
Q9HD89	RETN	INM:AR02	0.336969	13.8193	1.2594	0.224744	0.787842	-4.63667
Q86YZ3	HRNR	INM:AR02	-0.323834	13.8274	-1.2592	0.224812	0.787842	-4.63683
Q75N03	CBLL1	INM:AR02	0.388942	10.5001	1.25827	0.225141	0.787842	-4.63759
P55145	MANF	INM:AR02	-0.189056	13.0086	-1.25722	0.225512	0.787842	-4.63846
P20648	ATP4A	INM:AR02	-0.280023	16.4631	-1.25699	0.225593	0.787842	-4.63864
Q99460	PSMD1	INM:AR02	0.218136	13.2652	1.25675	0.225677	0.787842	-4.63884
Q93009	USP7	INM:AR02	-0.18839	13.8237	-1.25649	0.225771	0.787842	-4.63906
Q8NH03	OR2T3	INM:AR02	-0.40043	12.6924	-1.25253	0.227174	0.790314	-4.6423
Q9UBS4	DNAJB11	INM:AR02	-0.160335	16.6774	-1.25002	0.228068	0.790314	-4.64436
Q9NTJ5	SACM1L	INM:AR02	0.180989	13.6005	1.25001	0.228073	0.790314	-4.64437
O43617	TRAPPC3	INM:AR02	-0.282808	14.1972	-1.24825	0.228699	0.790314	-4.6458
Q8IZL8	PELP1	INM:AR02	0.338618	12.0665	1.24784	0.228846	0.790314	-4.64613
O75695	RP2	INM:AR02	0.172408	13.6164	1.24741	0.228998	0.790314	-4.64648
O43292	GPAA1	INM:AR02	-0.232052	12.895	-1.24734	0.229024	0.790314	-4.64654
Q86WV6	STING1	INM:AR02	0.358445	15.0724	1.24531	0.229752	0.791569	-4.6482
Q15435	PPP1R7	INM:AR02	0.244745	12.4922	1.24073	0.231396	0.795973	-4.65192
Q7Z2K6	ERMP1	INM:AR02	0.217238	13.235	1.23862	0.23216	0.797003	-4.65364
P05455	SSB	INM:AR02	-0.188171	12.838	-1.23619	0.233038	0.797003	-4.6556
Q9HBI0	PARVG	INM:AR02	-0.179933	13.959	-1.23571	0.233213	0.797003	-4.65599
Q15257	PTPA	INM:AR02	-0.276786	12.3441	-1.23432	0.233717	0.797003	-4.65712
P30040	ERP29	INM:AR02	0.178847	14.3925	1.22987	0.235337	0.797003	-4.66071
O95721	SNAP29	INM:AR02	0.171476	13.6247	1.22805	0.236003	0.797003	-4.66218
Q9BPX6	MICU1	INM:AR02	0.388733	11.2991	1.22735	0.236259	0.797003	-4.66274
Q96P70	IPO9	INM:AR02	0.230496	12.0578	1.22724	0.236299	0.797003	-4.66283
P24666	ACP1	INM:AR02	0.180068	12.4625	1.22715	0.236332	0.797003	-4.6629
Q53TN4	CYBRD1	INM:AR02	-0.379022	15.7845	-1.22638	0.236614	0.797003	-4.66352
P49756	RBM25	INM:AR02	0.251912	12.2571	1.22622	0.236673	0.797003	-4.66365
P62241	RPS8	INM:AR02	0.235383	13.3156	1.22392	0.237517	0.797003	-4.6655
Q8TF05	PPP4R1	INM:AR02	-0.206737	15.4715	-1.22351	0.237669	0.797003	-4.66583
Q15542	TAF5	INM:AR02	-0.461596	11.7133	-1.22312	0.237813	0.797003	-4.66615
P62316	SNRPD2	INM:AR02	-0.176819	14.4025	-1.22298	0.237862	0.797003	-4.66626
P12956	XRCC6	INM:AR02	-0.210132	17.7829	-1.22243	0.238068	0.797003	-4.6667
P23526	AHCY	INM:AR02	-0.171477	15.5305	-1.22128	0.238489	0.797003	-4.66762
P61019	RAB2A	INM:AR02	0.239714	12.9918	1.22095	0.238611	0.797003	-4.66789
O15042	U2SURP	INM:AR02	0.162286	12.8061	1.22082	0.238661	0.797003	-4.66799
Q14847	LASP1	INM:AR02	-0.188099	12.8946	-1.21949	0.239153	0.797421	-4.66906
Q6ZRS2	SRCAP	INM:AR02	0.348294	12.1545	1.21786	0.239754	0.797541	-4.67036
Q96BI1	SLC22A18	INM:AR02	-0.306392	13.1136	-1.21741	0.239923	0.797541	-4.67073
P50991	CCT4	INM:AR02	0.278027	14.1264	1.21401	0.241184	0.798383	-4.67344
Q9BUH6	PAXX	INM:AR02	-0.159893	15.278	-1.21389	0.24123	0.798383	-4.67354
P84077	ARF1	INM:AR02	0.266	14.1814	1.21376	0.241278	0.798383	-4.67364
Q92619	ARHGAP45	INM:AR02	0.152364	15.2825	1.21138	0.242165	0.800101	-4.67554
Q8IX01	SUGP2	INM:AR02	-0.244926	12.4093	-1.20976	0.242772	0.800888	-4.67683
Q7L576	CYFIP1	INM:AR02	0.330964	11.1186	1.20644	0.244013	0.803765	-4.67947
P16401	H1-5	INM:AR02	0.682214	15.0189	1.20472	0.244659	0.804144	-4.68083
O14976	GAK	INM:AR02	0.34087	12.7557	1.20417	0.244868	0.804144	-4.68128
P52630	STAT2	INM:AR02	-0.207912	12.9278	-1.20283	0.245372	0.804583	-4.68234
P07108	DBI	INM:AR02	-0.215905	14.1596	-1.2018	0.24576	0.804644	-4.68315
P0C7P4		INM:AR02	0.165983	15.445	1.19954	0.246615	0.806226	-4.68494
P24158	PRTN3	INM:AR02	-0.226402	22.3162	-1.19718	0.247511	0.806652	-4.68681
Q99613	EIF3C	INM:AR02	0.183463	13.7708	1.19554	0.248134	0.806652	-4.6881
Q9ULH1	ASAP1	INM:AR02	0.209632	12.9005	1.19483	0.248401	0.806652	-4.68866
Q5T447	HECTD3	INM:AR02	0.152882	12.6178	1.19397	0.248729	0.806652	-4.68933
P52948	NUP98	INM:AR02	-0.151613	12.8874	-1.19051	0.250051	0.806652	-4.69206
P11388	TOP2A	INM:AR02	0.316737	14.5292	1.18939	0.25048	0.806652	-4.69294
P11233	RALA	INM:AR02	0.20509	14.2651	1.18895	0.250647	0.806652	-4.69328
Q96RR4	CAMKK2	INM:AR02	0.204363	12.9281	1.18878	0.250713	0.806652	-4.69342
Q9UI08	EVL	INM:AR02	-0.253567	10.9398	-1.18602	0.251773	0.806652	-4.69558
O00391	QSOX1	INM:AR02	0.171985	16.2518	1.18499	0.252168	0.806652	-4.69639
P48556	PSMD8	INM:AR02	-0.15849	14.1185	-1.18453	0.252345	0.806652	-4.69675
P21281	ATP6V1B2	INM:AR02	0.440314	14.6628	1.18367	0.252677	0.806652	-4.69742
Q9BTT0	ANP32E	INM:AR02	-0.190969	16.1055	-1.18334	0.252804	0.806652	-4.69768
Q8N8A2	ANKRD44	INM:AR02	0.317216	13.2085	1.18327	0.252833	0.806652	-4.69774
Q8NHU6	TDRD7	INM:AR02	-0.275777	11.182	-1.18295	0.252956	0.806652	-4.69799
Q92621	NUP205	INM:AR02	0.129938	14.9205	1.18238	0.253177	0.806652	-4.69844
Q8IY21	DDX60	INM:AR02	-0.179723	12.6435	-1.18236	0.253184	0.806652	-4.69845
Q86TP1	PRUNE1	INM:AR02	-0.135751	14.0153	-1.18094	0.253733	0.806652	-4.69956
Q8IXM2	C17orf49	INM:AR02	0.26788	11.4029	1.17923	0.254393	0.806652	-4.70089
P49411	TUFM	INM:AR02	0.18357	15.5399	1.17853	0.254667	0.806652	-4.70144
Q5T4S7	UBR4	INM:AR02	-0.122933	15.4477	-1.17811	0.254831	0.806652	-4.70177
P17812	CTPS1	INM:AR02	-0.244471	12.6068	-1.17791	0.254908	0.806652	-4.70193
O15355	PPM1G	INM:AR02	-0.371683	12.6854	-1.1757	0.255766	0.807383	-4.70365
Q14554	PDIA5	INM:AR02	-0.180007	12.7794	-1.17313	0.256768	0.807383	-4.70565
P10644	PRKAR1A	INM:AR02	-0.329812	10.7745	-1.17303	0.256807	0.807383	-4.70573
Q6NUM6	TYW1B	INM:AR02	-0.173724	13.647	-1.17172	0.257316	0.807383	-4.70674
P05771	PRKCB	INM:AR02	0.182533	14.8008	1.17154	0.257388	0.807383	-4.70688
Q04637	EIF4G1	INM:AR02	0.270428	11.9005	1.17127	0.257493	0.807383	-4.70709
Q9NZC3	GDE1	INM:AR02	0.295065	11.1894	1.16982	0.258063	0.807383	-4.70822
Q8N5M9	JAGN1	INM:AR02	-0.198856	12.01	-1.16902	0.258374	0.807383	-4.70883
P17174	GOT1	INM:AR02	-0.22335	14.0077	-1.16848	0.258588	0.807383	-4.70926
Q9H078	CLPB	INM:AR02	-0.203507	12.0583	-1.1678	0.258853	0.807383	-4.70978
P04080	CSTB	INM:AR02	-0.25418	13.2282	-1.1654	0.259799	0.809172	-4.71164
O15173	PGRMC2	INM:AR02	-0.170432	15.0497	-1.16358	0.260513	0.810237	-4.71304
Q5T440	IBA57	INM:AR02	-0.313879	11.1898	-1.16186	0.261194	0.810445	-4.71437
P36957	DLST	INM:AR02	-0.156738	14.6681	-1.16056	0.261707	0.810445	-4.71537
Q9NY33	DPP3	INM:AR02	-0.204537	12.242	-1.16017	0.261863	0.810445	-4.71567
Q96L92	SNX27	INM:AR02	0.169934	13.9192	1.15965	0.262071	0.810445	-4.71607
Q14999	CUL7	INM:AR02	-0.284379	12.8778	-1.15779	0.262807	0.81062	-4.7175
P11117	ACP2	INM:AR02	0.131258	13.5776	1.15658	0.263289	0.81062	-4.71843
P40939	HADHA	INM:AR02	0.200262	14.0841	1.15605	0.263498	0.81062	-4.71884
P49754	VPS41	INM:AR02	-0.18192	13.6874	-1.15564	0.263661	0.81062	-4.71915
Q9Y259	CHKB	INM:AR02	-0.45661	10.1357	-1.15336	0.264571	0.81062	-4.7209
Q96KQ4	PPP1R13B	INM:AR02	-0.223547	13.1157	-1.15311	0.26467	0.81062	-4.72109
Q5SRE5	NUP188	INM:AR02	-0.138677	17.1718	-1.15294	0.264738	0.81062	-4.72122
Q13011	ECH1	INM:AR02	0.254683	12.1576	1.14837	0.26657	0.815081	-4.72472
Q8NFH5	NUP35	INM:AR02	0.294265	11.8313	1.14729	0.267004	0.815262	-4.72555
Q99442	SEC62	INM:AR02	-0.440933	9.73054	-1.14184	0.269202	0.819287	-4.7297
O75306	NDUFS2	INM:AR02	0.403563	13.3289	1.14166	0.269274	0.819287	-4.72983
P20138	CD33	INM:AR02	0.273635	12.8541	1.14122	0.269453	0.819287	-4.73017
Q13501	SQSTM1	INM:AR02	-0.294393	12.053	-1.13911	0.270307	0.820283	-4.73177
P07305	H1-0	INM:AR02	0.254642	15.1697	1.13855	0.270535	0.820283	-4.7322
P27797	CALR	INM:AR02	-0.178669	13.1844	-1.13665	0.271306	0.821477	-4.73363
Q6XQN6	NAPRT	INM:AR02	-0.30742	11.5611	-1.13383	0.272456	0.823809	-4.73577
P07355	ANXA2	INM:AR02	0.34503	13.2274	1.13146	0.273423	0.824247	-4.73756
P84090	ERH	INM:AR02	-0.2396	11.9033	-1.13059	0.27378	0.824247	-4.73821
Q9BRG1	VPS25	INM:AR02	0.162936	12.1907	1.13	0.274022	0.824247	-4.73866
Q8N3D4	EHBP1L1	INM:AR02	0.176826	11.9662	1.12893	0.27446	0.824247	-4.73946
Q9C0E8	LNPK	INM:AR02	-0.163769	15.2439	-1.12867	0.274568	0.824247	-4.73966
Q9Y6W5	WASF2	INM:AR02	0.335203	10.7598	1.12792	0.274875	0.824247	-4.74023
P28290	ITPRID2	INM:AR02	-0.313347	12.0957	-1.12619	0.275586	0.824356	-4.74153
P50395	GDI2	INM:AR02	-0.160814	16.0351	-1.12403	0.276477	0.824356	-4.74315
P14406	COX7A2	INM:AR02	0.373423	13.1336	1.12349	0.276697	0.824356	-4.74355
P51572	BCAP31	INM:AR02	0.140055	14.3028	1.12172	0.277428	0.824356	-4.74488
Q6ZVK8	NUDT18	INM:AR02	-0.263027	11.0873	-1.11897	0.27857	0.824356	-4.74694
Q01844	EWSR1	INM:AR02	-0.154819	13.1056	-1.11877	0.278652	0.824356	-4.74709
Q02040	AKAP17A	INM:AR02	0.271002	12.0646	1.11872	0.278671	0.824356	-4.74712
Q86VR2	RETREG3	INM:AR02	-0.317425	9.6925	-1.11859	0.278727	0.824356	-4.74722
B5ME19	EIF3CL	INM:AR02	0.323348	13.0535	1.11819	0.278893	0.824356	-4.74752
Q16877	PFKFB4	INM:AR02	-0.146588	14.6539	-1.11779	0.27906	0.824356	-4.74782
Q9P253	VPS18	INM:AR02	0.171549	12.3834	1.11728	0.279272	0.824356	-4.7482
Q6NYC8	PPP1R18	INM:AR02	-0.182436	13.0777	-1.11628	0.279685	0.824356	-4.74894
O43143	DHX15	INM:AR02	0.473496	14.0649	1.11588	0.279853	0.824356	-4.74925
Q96RU7	TRIB3	INM:AR02	0.375117	16.7488	1.1122	0.281386	0.824356	-4.75198
P15924	DSP	INM:AR02	-0.285685	13.1953	-1.11089	0.281937	0.824356	-4.75296
Q96BY9	SARAF	INM:AR02	-0.257667	13.0589	-1.11084	0.281958	0.824356	-4.753
P51991	HNRNPA3	INM:AR02	0.130044	14.1784	1.10994	0.282335	0.824356	-4.75367
Q9UKA4	AKAP11	INM:AR02	-0.205964	13.0405	-1.1099	0.282351	0.824356	-4.7537
P27824	CANX	INM:AR02	-0.14345	17.6462	-1.10949	0.282521	0.824356	-4.754
Q9UKV3	ACIN1	INM:AR02	-0.163547	13.92	-1.10914	0.282668	0.824356	-4.75426
Q99567	NUP88	INM:AR02	-0.149557	15.3387	-1.10865	0.282875	0.824356	-4.75463
P23284	PPIB	INM:AR02	-0.224176	15.3037	-1.10736	0.283415	0.824824	-4.75558
P00480	OTC	INM:AR02	-0.189899	12.5168	-1.1037	0.284957	0.828203	-4.75829
O75150	RNF40	INM:AR02	0.243454	11.7527	1.10273	0.285368	0.828292	-4.75901
Q8NBX0	SCCPDH	INM:AR02	0.160123	15.5252	1.10076	0.286197	0.829581	-4.76046
O75531	BANF1	INM:AR02	0.52467	13.2123	1.09987	0.286576	0.829581	-4.76112
Q9UKG1	APPL1	INM:AR02	-0.249676	12.4277	-1.09832	0.287234	0.830381	-4.76226
P99999	CYCS	INM:AR02	-0.225263	16.4393	-1.0965	0.288008	0.831348	-4.7636
O75083	WDR1	INM:AR02	0.383541	12.4047	1.0949	0.288687	0.831348	-4.76478
P82979	SARNP	INM:AR02	0.209131	15.0559	1.09483	0.288716	0.831348	-4.76482
A8MXV4	NUDT19	INM:AR02	-0.218946	11.7636	-1.09192	0.289958	0.83236	-4.76696
P62195	PSMC5	INM:AR02	-0.134211	13.6726	-1.09141	0.290178	0.83236	-4.76734
Q8IWB1	ITPRIP	INM:AR02	0.344891	11.8736	1.0899	0.290821	0.83236	-4.76844
P43490	NAMPT	INM:AR02	-0.168757	18.2443	-1.08904	0.29119	0.83236	-4.76907
Q9H0D6	XRN2	INM:AR02	0.166576	14.7159	1.08875	0.291313	0.83236	-4.76928
Q9Y2Q3	GSTK1	INM:AR02	-0.248381	15.7435	-1.08712	0.292014	0.83236	-4.77047
Q9NR46	SH3GLB2	INM:AR02	-0.214262	12.7302	-1.08611	0.292447	0.83236	-4.77121
P35241	RDX	INM:AR02	-0.208478	11.3183	-1.08585	0.292561	0.83236	-4.7714
Q9H7L9	SUDS3	INM:AR02	-0.174648	12.3647	-1.08553	0.292699	0.83236	-4.77163
Q5EBM0	CMPK2	INM:AR02	0.327079	13.5511	1.08507	0.292896	0.83236	-4.77197
O00231	PSMD11	INM:AR02	0.246665	13.7825	1.08322	0.293694	0.832583	-4.77332
P00491	PNP	INM:AR02	0.189925	13.8817	1.08311	0.29374	0.832583	-4.77339
O43865	AHCYL1	INM:AR02	-0.238444	12.6297	-1.08034	0.294939	0.832837	-4.77541
O43390	HNRNPR	INM:AR02	0.206442	13.9597	1.08008	0.29505	0.832837	-4.7756
Q9UHD8	SEPTIN9	INM:AR02	0.115953	14.3854	1.07976	0.29519	0.832837	-4.77583
Q9H7D0	DOCK5	INM:AR02	0.191267	14	1.07862	0.29568	0.832837	-4.77665
O75477	ERLIN1	INM:AR02	0.163327	14.8478	1.07664	0.296539	0.832837	-4.77809
O43353	RIPK2	INM:AR02	-0.220696	12.865	-1.07624	0.296716	0.832837	-4.77838
Q7Z6Z7	HUWE1	INM:AR02	0.209567	11.8803	1.07531	0.297118	0.832837	-4.77905
Q86VP6	CAND1	INM:AR02	0.139586	13.0453	1.07507	0.297223	0.832837	-4.77923
O15021	MAST4	INM:AR02	0.285899	18.3755	1.07431	0.297556	0.832837	-4.77978
Q9BVC6	TMEM109	INM:AR02	-0.169668	13.2265	-1.07407	0.297661	0.832837	-4.77996
A8MTJ3	GNAT3	INM:AR02	0.147345	15.8477	1.07221	0.298473	0.834035	-4.7813
Q96QT6	PHF12	INM:AR02	-0.167213	12.0619	-1.07073	0.299115	0.834757	-4.78236
P27695	APEX1	INM:AR02	-0.228549	13.5119	-1.06689	0.300798	0.838003	-4.78513
Q13620	CUL4B	INM:AR02	-0.261032	12.8961	-1.06605	0.301168	0.838003	-4.78573
P07737	PFN1	INM:AR02	0.279856	15.5548	1.06485	0.301694	0.838003	-4.78659
Q9P2K8	EIF2AK4	INM:AR02	0.328787	11.6253	1.06432	0.30193	0.838003	-4.78698
Q16531	DDB1	INM:AR02	-0.177725	13.9777	-1.06254	0.302711	0.838003	-4.78825
Q8N1G4	LRRC47	INM:AR02	0.211199	12.337	1.06033	0.303689	0.838003	-4.78983
Q01638	IL1RL1	INM:AR02	0.295753	12.7396	1.05882	0.304355	0.838003	-4.79091
P50990	CCT8	INM:AR02	0.175009	15.3937	1.05754	0.30492	0.838003	-4.79182
O00750	PIK3C2B	INM:AR02	-0.224301	15.8558	-1.05512	0.305998	0.838003	-4.79355
P21675	TAF1	INM:AR02	-0.250675	12.1703	-1.05485	0.306116	0.838003	-4.79374
Q9P1U1	ACTR3B	INM:AR02	-0.191626	16.7314	-1.05393	0.306527	0.838003	-4.7944
Q13574	DGKZ	INM:AR02	0.186966	13.6331	1.05386	0.306558	0.838003	-4.79445
Q04760	GLO1	INM:AR02	-0.182547	12.5784	-1.05343	0.30675	0.838003	-4.79475
Q6ZUM4	ARHGAP27	INM:AR02	0.159339	13.6339	1.05111	0.307784	0.838003	-4.7964
O75131	CPNE3	INM:AR02	0.236923	14.3759	1.04907	0.308691	0.838003	-4.79784
Q04726	TLE3	INM:AR02	-0.152545	13.3	-1.0487	0.30886	0.838003	-4.79811
P50749	RASSF2	INM:AR02	0.312279	12.0037	1.04857	0.308919	0.838003	-4.7982
Q6NS38	ALKBH2	INM:AR02	-0.284069	11.6713	-1.04849	0.308954	0.838003	-4.79826
Q8IV50	LYSMD2	INM:AR02	0.192695	12.0816	1.04676	0.30973	0.838003	-4.79949
O00308	WWP2	INM:AR02	-0.270427	11.86	-1.04599	0.310075	0.838003	-4.80003
P09913	IFIT2	INM:AR02	-0.298648	12.6119	-1.04594	0.310095	0.838003	-4.80006
Q13905	RAPGEF1	INM:AR02	0.236631	14.8001	1.04501	0.310513	0.838003	-4.80072
Q9H2D6	TRIOBP	INM:AR02	-0.124978	13.5403	-1.04304	0.311397	0.838003	-4.80211
Q96JJ7	TMX3	INM:AR02	0.221454	14.5551	1.04279	0.311512	0.838003	-4.80229
Q9ULC5	ACSL5	INM:AR02	0.216387	12.7253	1.04199	0.31187	0.838003	-4.80285
Q8TBP6	SLC25A40	INM:AR02	0.185771	12.1677	1.04139	0.312142	0.838003	-4.80327
P53618	COPB1	INM:AR02	0.127008	16.0962	1.03849	0.31345	0.838003	-4.80531
O75964	ATP5MG	INM:AR02	0.254541	13.6723	1.03847	0.313459	0.838003	-4.80533
O43493	TGOLN2	INM:AR02	-0.350635	10.2723	-1.03782	0.313753	0.838003	-4.80578
P50452	SERPINB8	INM:AR02	-0.292401	11.9103	-1.03769	0.313812	0.838003	-4.80587
P30086	PEBP1	INM:AR02	-0.312514	10.9708	-1.03762	0.313844	0.838003	-4.80592
P07951	TPM2	INM:AR02	-0.177659	14.6879	-1.03753	0.313885	0.838003	-4.80599
Q9UJ70	NAGK	INM:AR02	-0.256328	15.2318	-1.03612	0.314524	0.838003	-4.80698
Q15349	RPS6KA2	INM:AR02	0.164319	12.8867	1.03551	0.314799	0.838003	-4.8074
Q96CX2	KCTD12	INM:AR02	-0.170597	15.9993	-1.03367	0.315635	0.838003	-4.80869
Q8IWX8	CHERP	INM:AR02	-0.244998	12.7452	-1.03338	0.315766	0.838003	-4.80889
Q9Y2Z9	COQ6	INM:AR02	-0.411133	12.0271	-1.03326	0.31582	0.838003	-4.80898
Q6PIU2	NCEH1	INM:AR02	-0.377176	11.1189	-1.03311	0.315888	0.838003	-4.80908
P11279	LAMP1	INM:AR02	0.168803	16.0975	1.03299	0.315946	0.838003	-4.80917
P48449	LSS	INM:AR02	0.258799	12.1442	1.03257	0.316136	0.838003	-4.80946
Q5SYE7	NHSL1	INM:AR02	-0.183923	16.0545	-1.0317	0.316531	0.838003	-4.81007
P09525	ANXA4	INM:AR02	0.187052	14.873	1.03169	0.316537	0.838003	-4.81008
O15111	CHUK	INM:AR02	-0.223525	12.5889	-1.02977	0.317412	0.838003	-4.81142
O15350	TP73	INM:AR02	-0.153686	13.3564	-1.02936	0.3176	0.838003	-4.81171
P67936	TPM4	INM:AR02	-0.299524	13.4895	-1.02919	0.317678	0.838003	-4.81183
P42126	ECI1	INM:AR02	-0.130462	14.2345	-1.02846	0.31801	0.838003	-4.81233
P07203	GPX1	INM:AR02	-0.157912	13.5933	-1.02718	0.318596	0.838143	-4.81323
Q15833	STXBP2	INM:AR02	0.158231	14.7313	1.02482	0.319674	0.838143	-4.81486
P19784	CSNK2A2	INM:AR02	0.230893	12.4327	1.02398	0.32006	0.838143	-4.81545
O15427	SLC16A3	INM:AR02	0.126247	14.2518	1.02324	0.320401	0.838143	-4.81596
Q9P2I0	CPSF2	INM:AR02	0.185101	12.6713	1.02238	0.320796	0.838143	-4.81656
Q99459	CDC5L	INM:AR02	0.204701	14.6874	1.02211	0.32092	0.838143	-4.81675
Q15369	ELOC	INM:AR02	0.369925	12.3455	1.02191	0.321013	0.838143	-4.81689
P35749	MYH11	INM:AR02	0.155961	15.9367	1.02162	0.321147	0.838143	-4.81709
P17987	TCP1	INM:AR02	0.166149	12.8462	1.01801	0.322811	0.838213	-4.81959
Q9H9S4	CAB39L	INM:AR02	-0.159597	12.2666	-1.01719	0.323188	0.838213	-4.82015
O75663	TIPRL	INM:AR02	-0.242561	12.6915	-1.01712	0.323218	0.838213	-4.8202
Q86UP2	KTN1	INM:AR02	-0.297958	11.967	-1.01683	0.323355	0.838213	-4.8204
Q969E2	SCAMP4	INM:AR02	0.314396	12.0357	1.01633	0.323587	0.838213	-4.82075
O60645	EXOC3	INM:AR02	0.264862	12.6958	1.01603	0.323726	0.838213	-4.82095
P50402	EMD	INM:AR02	-0.11728	13.2687	-1.01275	0.325246	0.838213	-4.82321
P25098	GRK2	INM:AR02	-0.118372	17.0234	-1.0124	0.325407	0.838213	-4.82345
P12236	SLC25A6	INM:AR02	0.286019	13.3897	1.01197	0.325607	0.838213	-4.82375
P78406	RAE1	INM:AR02	-0.404769	12.6829	-1.01077	0.326162	0.838213	-4.82457
Q9Y5X0	SNX10	INM:AR02	-0.33661	11.5015	-1.01058	0.326253	0.838213	-4.8247
Q04446	GBE1	INM:AR02	-0.202054	14.0169	-1.00983	0.326599	0.838213	-4.82521
P62495	ETF1	INM:AR02	0.141818	15.319	1.00908	0.32695	0.838213	-4.82573
Q8IVF2	AHNAK2	INM:AR02	0.366061	15.0268	1.00898	0.326997	0.838213	-4.8258
Q8IX12	CCAR1	INM:AR02	0.306171	11.8811	1.00863	0.327159	0.838213	-4.82604
P31939	ATIC	INM:AR02	-0.235908	11.1973	-1.00739	0.327737	0.838213	-4.82689
Q9NRD1	FBXO6	INM:AR02	-0.183817	11.5364	-1.00698	0.32793	0.838213	-4.82717
Q9NZT2	OGFR	INM:AR02	0.125832	13.259	1.00629	0.328255	0.838213	-4.82765
P32119	PRDX2	INM:AR02	0.289669	12.8155	1.00449	0.329093	0.838213	-4.82887
P52272	HNRNPM	INM:AR02	0.164133	15.8648	1.00386	0.329388	0.838213	-4.8293
P52564	MAP2K6	INM:AR02	-0.278509	13.0528	-1.00314	0.329726	0.838213	-4.82979
P21796	VDAC1	INM:AR02	0.177333	12.4466	1.00245	0.330048	0.838213	-4.83026
O14802	POLR3A	INM:AR02	0.311056	19.0879	1.00234	0.330101	0.838213	-4.83034
Q06830	PRDX1	INM:AR02	-0.137551	13.2614	-1.00102	0.330722	0.838213	-4.83124
P33241	LSP1	INM:AR02	0.15723	15.1931	1.00024	0.331087	0.838213	-4.83177
P56192	MARS1	INM:AR02	0.194653	12.1278	0.999833	0.331279	0.838213	-4.83205
Q9UP83	COG5	INM:AR02	-0.16989	12.8175	-0.999185	0.331584	0.838213	-4.83249
Q12888	TP53BP1	INM:AR02	0.290173	10.7398	0.997905	0.332187	0.838761	-4.83336
P27694	RPA1	INM:AR02	-0.163544	13.2858	-0.996517	0.332841	0.839439	-4.8343
P15309	ACP3	INM:AR02	-0.215221	12.4784	-0.99402	0.334021	0.841438	-4.83599
P16435	POR	INM:AR02	-0.241562	11.5114	-0.991863	0.335042	0.843034	-4.83745
O75608	LYPLA1	INM:AR02	-0.140114	15.0626	-0.990452	0.335711	0.843742	-4.8384
Q92539	LPIN2	INM:AR02	-0.141429	14.4121	-0.98662	0.337534	0.847342	-4.84099
O43488	AKR7A2	INM:AR02	-0.120971	12.8001	-0.981805	0.339833	0.850786	-4.84422
Q6ZMI0	PPP1R21	INM:AR02	-0.233632	12.2876	-0.981526	0.339967	0.850786	-4.84441
Q96MW1	CCDC43	INM:AR02	-0.231118	13.7801	-0.979741	0.340822	0.850786	-4.8456
P01034	CST3	INM:AR02	-0.244908	12.0357	-0.978604	0.341368	0.850786	-4.84636
Q969T9	WBP2	INM:AR02	0.269258	12.8639	0.978253	0.341537	0.850786	-4.84659
O75475	PSIP1	INM:AR02	-0.164232	13.4981	-0.978039	0.34164	0.850786	-4.84674
P22681	CBL	INM:AR02	-0.114699	15.527	-0.97747	0.341913	0.850786	-4.84712
O15511	ARPC5	INM:AR02	0.265805	14.6425	0.977214	0.342036	0.850786	-4.84729
P49815	TSC2	INM:AR02	0.243157	11.0169	0.97431	0.343435	0.853192	-4.84922
P61224	RAP1B	INM:AR02	0.40441	16.2997	0.971892	0.344602	0.853192	-4.85083
P14923	JUP	INM:AR02	-0.328937	12.0365	-0.96965	0.345687	0.853192	-4.85232
Q14123	PDE1C	INM:AR02	-0.210081	12.6883	-0.969424	0.345797	0.853192	-4.85247
P50213	IDH3A	INM:AR02	0.328456	11.8967	0.9686	0.346196	0.853192	-4.85301
Q92620	DHX38	INM:AR02	0.203117	10.5439	0.967877	0.346547	0.853192	-4.85349
Q96DI7	SNRNP40	INM:AR02	-0.180274	11.9541	-0.965654	0.347627	0.853192	-4.85496
P18754	RCC1	INM:AR02	-0.317857	13.2337	-0.964963	0.347963	0.853192	-4.85542
A7E2V4	ZSWIM8	INM:AR02	0.22597	13.6619	0.964889	0.347999	0.853192	-4.85547
Q8TD16	BICD2	INM:AR02	-0.423901	10.4771	-0.963673	0.348592	0.853192	-4.85627
Q9H9F9	ACTR5	INM:AR02	-0.222075	11.1618	-0.962573	0.349128	0.853192	-4.85699
Q02880	TOP2B	INM:AR02	0.110309	13.1608	0.961668	0.349569	0.853192	-4.85759
P54803	GALC	INM:AR02	-0.197238	12.4306	-0.961539	0.349632	0.853192	-4.85767
P78371	CCT2	INM:AR02	0.178447	14.1917	0.96065	0.350067	0.853192	-4.85826
Q6UWE0	LRSAM1	INM:AR02	-0.177585	14.3977	-0.960575	0.350103	0.853192	-4.85831
Q02218	OGDH	INM:AR02	0.233666	15.072	0.960235	0.350269	0.853192	-4.85853
Q9UBU9	NXF1	INM:AR02	0.289783	13.001	0.958218	0.351257	0.853192	-4.85986
P09960	LTA4H	INM:AR02	-0.211298	15.0015	-0.957761	0.35148	0.853192	-4.86015
Q8NEZ4	KMT2C	INM:AR02	0.242689	11.6856	0.955718	0.352483	0.853192	-4.86149
Q6P179	ERAP2	INM:AR02	0.225522	13.0789	0.954273	0.353193	0.853192	-4.86244
Q8IXI2	RHOT1	INM:AR02	0.153923	13.9458	0.953823	0.353414	0.853192	-4.86273
Q96HW7	INTS4	INM:AR02	-0.180198	12.0861	-0.953569	0.353539	0.853192	-4.8629
P06127	CD5	INM:AR02	-0.192284	11.385	-0.953003	0.353817	0.853192	-4.86327
Q16851	UGP2	INM:AR02	-0.139727	16.8358	-0.952234	0.354196	0.853192	-4.86377
Q9UGI8	TES	INM:AR02	0.155152	13.7518	0.95179	0.354415	0.853192	-4.86406
Q96HE7	ERO1A	INM:AR02	0.172735	13.6173	0.951112	0.35475	0.853192	-4.8645
Q9H3U1	UNC45A	INM:AR02	0.130241	13.7865	0.949969	0.355314	0.853192	-4.86525
P05165	PCCA	INM:AR02	0.160299	12.0364	0.947608	0.356481	0.853192	-4.86678
O95782	AP2A1	INM:AR02	0.180894	13.2426	0.947136	0.356714	0.853192	-4.86709
Q8IUC8	GALNT13	INM:AR02	-0.19564	14.9818	-0.947019	0.356772	0.853192	-4.86716
P51149	RAB7A	INM:AR02	0.186002	15.7229	0.946746	0.356907	0.853192	-4.86734
Q04864	REL	INM:AR02	-0.101993	14.1173	-0.94665	0.356955	0.853192	-4.8674
Q5T9A4	ATAD3B	INM:AR02	-0.225508	11.3394	-0.946267	0.357145	0.853192	-4.86765
Q9UEY8	ADD3	INM:AR02	0.152071	14.5457	0.945413	0.357568	0.853192	-4.86821
O95197	RTN3	INM:AR02	0.347235	11.8582	0.945334	0.357607	0.853192	-4.86826
Q9NX02	NLRP2	INM:AR02	-0.235989	12.8039	-0.944594	0.357974	0.853192	-4.86874
Q08043	ACTN3	INM:AR02	-0.150585	13.3321	-0.944583	0.35798	0.853192	-4.86874
Q9NP79	VTA1	INM:AR02	0.170722	13.5795	0.943971	0.358283	0.853192	-4.86914
P26038	MSN	INM:AR02	-0.141057	16.4386	-0.943699	0.358419	0.853192	-4.86932
O14715	RGPD8	INM:AR02	0.195998	12.5486	0.942129	0.359199	0.853192	-4.87033
P12268	IMPDH2	INM:AR02	0.201188	14.8493	0.939488	0.360514	0.853192	-4.87204
P0DME0	SETSIP	INM:AR02	-0.215721	12.6122	-0.93907	0.360723	0.853192	-4.87231
Q14152	EIF3A	INM:AR02	-0.0973128	15.3635	-0.938188	0.361163	0.853192	-4.87287
P01024	C3	INM:AR02	0.119981	13.2954	0.937558	0.361478	0.853192	-4.87328
O95573	ACSL3	INM:AR02	0.185748	11.3963	0.937298	0.361608	0.853192	-4.87345
Q8N556	AFAP1	INM:AR02	-0.1788	11.7975	-0.936448	0.362033	0.853192	-4.87399
Q9Y4E8	USP15	INM:AR02	0.280791	12.0529	0.936387	0.362063	0.853192	-4.87403
P21333	FLNA	INM:AR02	-0.12753	17.6782	-0.936366	0.362073	0.853192	-4.87405
P52907	CAPZA1	INM:AR02	0.413172	9.98809	0.935625	0.362444	0.853192	-4.87452
Q5JSP0	FGD3	INM:AR02	-0.116245	13.454	-0.935262	0.362626	0.853192	-4.87476
P03905	ND4	INM:AR02	0.274664	10.2987	0.934087	0.363215	0.853653	-4.87551
P12694	BCKDHA	INM:AR02	-0.188587	12.1414	-0.930973	0.364778	0.855964	-4.87751
O00571	DDX3X	INM:AR02	0.131572	13.5446	0.929684	0.365426	0.855964	-4.87833
O43759	SYNGR1	INM:AR02	-0.268803	12.0276	-0.929303	0.365618	0.855964	-4.87857
P62269	RPS18	INM:AR02	0.123706	17.3505	0.927825	0.366362	0.855964	-4.87952
Q8TCJ2	STT3B	INM:AR02	0.13777	14.7738	0.926458	0.367052	0.855964	-4.88039
Q01433	AMPD2	INM:AR02	0.175822	12.184	0.925197	0.367689	0.855964	-4.88119
Q9P265	DIP2B	INM:AR02	0.179737	11.7545	0.924981	0.367799	0.855964	-4.88133
P35637	FUS	INM:AR02	0.247609	11.2222	0.924516	0.368033	0.855964	-4.88162
O95490	ADGRL2	INM:AR02	-0.125598	16.352	-0.924357	0.368114	0.855964	-4.88172
Q9H8S9	MOB1A	INM:AR02	0.390844	11.2745	0.924314	0.368136	0.855964	-4.88175
Q9BTC0	DIDO1	INM:AR02	-0.145413	11.8344	-0.920099	0.370272	0.856732	-4.88443
P50502	ST13	INM:AR02	0.292345	13.3722	0.919797	0.370426	0.856732	-4.88462
Q7Z3U7	MON2	INM:AR02	-0.146691	11.5017	-0.919408	0.370623	0.856732	-4.88486
Q9BXL7	CARD11	INM:AR02	0.170452	11.4907	0.918774	0.370945	0.856732	-4.88527
P25325	MPST	INM:AR02	0.243341	11.5464	0.917169	0.371762	0.856732	-4.88628
P07602	PSAP	INM:AR02	-0.101025	17.1632	-0.916442	0.372132	0.856732	-4.88674
Q9NX40	OCIAD1	INM:AR02	0.151353	13.3214	0.916318	0.372195	0.856732	-4.88682
P48643	CCT5	INM:AR02	0.11521	14.7906	0.914567	0.373089	0.856732	-4.88792
Q8WY22	BRI3BP	INM:AR02	-0.15157	13.9131	-0.914107	0.373324	0.856732	-4.88821
Q14195	DPYSL3	INM:AR02	-0.157348	13.3015	-0.912333	0.37423	0.856732	-4.88933
O95260	ATE1	INM:AR02	-0.155143	13.067	-0.912325	0.374234	0.856732	-4.88933
P30626	SRI	INM:AR02	-0.142918	16.3412	-0.912248	0.374273	0.856732	-4.88938
P50548	ERF	INM:AR02	-0.385999	9.15529	-0.91217	0.374313	0.856732	-4.88943
Q9Y678	COPG1	INM:AR02	0.183768	13.1137	0.912077	0.374361	0.856732	-4.88949
P35813	PPM1A	INM:AR02	0.190699	12.2347	0.91198	0.374411	0.856732	-4.88955
P46934	NEDD4	INM:AR02	0.46534	9.03293	0.911276	0.374771	0.856732	-4.88999
Q6YN16	HSDL2	INM:AR02	0.188482	14.0148	0.909285	0.375791	0.857382	-4.89124
P26885	FKBP2	INM:AR02	0.25135	13.9607	0.908141	0.376379	0.857382	-4.89195
Q8WUM0	NUP133	INM:AR02	-0.139537	14.6951	-0.907265	0.376829	0.857382	-4.8925
Q10588	BST1	INM:AR02	0.262328	13.5763	0.906532	0.377205	0.857382	-4.89296
O14727	APAF1	INM:AR02	-0.148648	13.6351	-0.905793	0.377585	0.857382	-4.89342
Q8WVC6	DCAKD	INM:AR02	0.229797	18.2167	0.904799	0.378097	0.857382	-4.89404
Q53GL7	PARP10	INM:AR02	-0.1312	13.2797	-0.903952	0.378533	0.857382	-4.89457
Q5TC84	OGFRL1	INM:AR02	0.24328	11.6254	0.90339	0.378823	0.857382	-4.89492
P46777	RPL5	INM:AR02	-0.125232	15.181	-0.903304	0.378868	0.857382	-4.89498
Q9NSC2	SALL1	INM:AR02	-0.164224	15.1076	-0.903049	0.378999	0.857382	-4.89513
P19878	NCF2	INM:AR02	0.152237	15.9083	0.90159	0.379752	0.858193	-4.89604
P20337	RAB3B	INM:AR02	0.448633	15.2821	0.899817	0.380669	0.858553	-4.89714
Q9Y4Z0	LSM4	INM:AR02	-0.135936	13.1818	-0.899415	0.380877	0.858553	-4.89739
Q96Q11	TRNT1	INM:AR02	0.186106	11.5916	0.898991	0.381096	0.858553	-4.89766
Q8N0U8	VKORC1L1	INM:AR02	0.325725	10.8035	0.897674	0.381779	0.8592	-4.89847
Q15819	UBE2V2	INM:AR02	0.133969	14.5779	0.896376	0.382452	0.859824	-4.89928
Q05655	PRKCD	INM:AR02	-0.100023	15.8812	-0.894692	0.383327	0.860113	-4.90032
Q96JM3	CHAMP1	INM:AR02	0.191691	11.0507	0.894606	0.383371	0.860113	-4.90037
Q92888	ARHGEF1	INM:AR02	0.127265	15.9164	0.893136	0.384136	0.86094	-4.90128
Q16799	RTN1	INM:AR02	-0.245909	11.6683	-0.891125	0.385184	0.861443	-4.90252
P09622	DLD	INM:AR02	-0.24501	11.069	-0.890348	0.385589	0.861443	-4.903
Q01105	SET	INM:AR02	-0.151534	13.3036	-0.890211	0.385661	0.861443	-4.90308
Q9NRX2	MRPL17	INM:AR02	-0.289464	11.935	-0.889665	0.385945	0.861443	-4.90342
P15498	VAV1	INM:AR02	-0.13339	13.7522	-0.887413	0.387123	0.86157	-4.9048
O15054	KDM6B	INM:AR02	-0.216476	11.1221	-0.88637	0.387668	0.86157	-4.90544
A3KMH1	VWA8	INM:AR02	-0.131064	12.6422	-0.885196	0.388284	0.86157	-4.90616
P01008	SERPINC1	INM:AR02	0.213313	14.6827	0.885089	0.38834	0.86157	-4.90622
Q8N392	ARHGAP18	INM:AR02	-0.117034	14.5992	-0.884945	0.388415	0.86157	-4.90631
P07814	EPRS1	INM:AR02	0.155411	12.6519	0.88439	0.388707	0.86157	-4.90665
P62306	SNRPF	INM:AR02	-0.345698	14.586	-0.883551	0.389147	0.86157	-4.90716
Q9NVZ3	NECAP2	INM:AR02	0.140763	11.9636	0.883502	0.389173	0.86157	-4.90719
P52788	SMS	INM:AR02	-0.163274	12.4066	-0.882571	0.389662	0.861775	-4.90776
Q5JTV8	TOR1AIP1	INM:AR02	0.150176	14.8055	0.881005	0.390485	0.86185	-4.90872
Q9P289	STK26	INM:AR02	0.131001	14.2199	0.878393	0.391861	0.86185	-4.91031
A2RUS2	DENND3	INM:AR02	0.241791	12.1655	0.878084	0.392024	0.86185	-4.91049
P55899	FCGRT	INM:AR02	0.271008	12.2198	0.877236	0.392472	0.86185	-4.91101
Q14247	CTTN	INM:AR02	0.203736	12.107	0.877151	0.392516	0.86185	-4.91106
Q13136	PPFIA1	INM:AR02	-0.11725	13.0956	-0.877076	0.392556	0.86185	-4.91111
Q9H845	ACAD9	INM:AR02	0.16923	12.6702	0.875956	0.393148	0.86185	-4.91178
A6NJG2	SOWAHD	INM:AR02	-0.131671	12.7293	-0.875222	0.393536	0.86185	-4.91223
A2AJT9	BCLAF3	INM:AR02	-0.225017	10.4023	-0.874305	0.394021	0.86185	-4.91279
Q15208	STK38	INM:AR02	-0.127137	15.0004	-0.874187	0.394084	0.86185	-4.91286
Q8WVV9	HNRNPLL	INM:AR02	-0.176362	11.3154	-0.872388	0.395037	0.86185	-4.91394
P25490	YY1	INM:AR02	0.179092	13.1496	0.871134	0.395702	0.86185	-4.9147
Q14166	TTLL12	INM:AR02	-0.113629	14.5377	-0.87066	0.395954	0.86185	-4.91499
Q15008	PSMD6	INM:AR02	0.184857	13.5725	0.87015	0.396225	0.86185	-4.9153
Q9BZF1	OSBPL8	INM:AR02	0.185426	12.053	0.868938	0.396869	0.86185	-4.91603
Q96DZ1	ERLEC1	INM:AR02	0.162169	11.4085	0.868117	0.397306	0.86185	-4.91652
Q7LDG7	RASGRP2	INM:AR02	-0.120527	13.5166	-0.867909	0.397417	0.86185	-4.91664
P40123	CAP2	INM:AR02	0.359487	12.8034	0.867273	0.397755	0.86185	-4.91703
Q9Y6N5	SQOR	INM:AR02	0.120365	17.1839	0.866757	0.398031	0.86185	-4.91734
Q5JWF2	GNAS	INM:AR02	0.180084	13.6045	0.865923	0.398475	0.86185	-4.91784
O95210	STBD1	INM:AR02	0.162449	11.8106	0.865053	0.398939	0.86185	-4.91836
Q9P258	RCC2	INM:AR02	-0.124419	13.9489	-0.864688	0.399134	0.86185	-4.91858
P06731	CEACAM5	INM:AR02	0.14226	16.8218	0.864623	0.399169	0.86185	-4.91862
Q14677	CLINT1	INM:AR02	0.190253	11.4384	0.864002	0.3995	0.86185	-4.91899
O75688	PPM1B	INM:AR02	0.107496	15.3462	0.862863	0.400109	0.86185	-4.91967
Q03405	PLAUR	INM:AR02	-0.221247	12.1898	-0.86122	0.400988	0.86185	-4.92065
P33121	ACSL1	INM:AR02	0.101615	14.6108	0.861094	0.401056	0.86185	-4.92073
P33240	CSTF2	INM:AR02	0.137497	13.224	0.860612	0.401314	0.86185	-4.92102
P61020	RAB5B	INM:AR02	0.186402	14.2198	0.859932	0.401678	0.86185	-4.92142
Q6PGP7	SKIC3	INM:AR02	0.410988	12.703	0.858813	0.402278	0.86185	-4.92209
Q8ND04	SMG8	INM:AR02	-0.162775	12.1906	-0.858497	0.402448	0.86185	-4.92228
P10155	RO60	INM:AR02	-0.192962	13.3183	-0.857303	0.40309	0.86185	-4.92299
P59998	ARPC4	INM:AR02	0.2766	15.6213	0.856548	0.403495	0.86185	-4.92344
O75390	CS	INM:AR02	0.142167	16.2361	0.856377	0.403587	0.86185	-4.92354
Q96JH7	VCPIP1	INM:AR02	0.164751	12.4763	0.854736	0.40447	0.86185	-4.92451
Q96PU8	QKI	INM:AR02	-0.126606	12.639	-0.852536	0.405656	0.86185	-4.92582
Q9NUP1	BLOC1S4	INM:AR02	0.157962	13.2106	0.852245	0.405813	0.86185	-4.92599
Q13263	TRIM28	INM:AR02	-0.118062	12.2297	-0.851953	0.405971	0.86185	-4.92616
P35611	ADD1	INM:AR02	0.114088	15.4451	0.849975	0.407039	0.86185	-4.92733
O43395	PRPF3	INM:AR02	-0.203853	13.4358	-0.849817	0.407125	0.86185	-4.92742
Q9BV40	VAMP8	INM:AR02	0.180338	14.7714	0.849066	0.407531	0.86185	-4.92787
Q14165	MLEC	INM:AR02	0.112015	13.7636	0.848802	0.407674	0.86185	-4.92802
P14618	PKM	INM:AR02	0.177416	18.5913	0.847129	0.40858	0.86185	-4.92901
Q13155	AIMP2	INM:AR02	0.186551	12.4859	0.846937	0.408684	0.86185	-4.92912
Q9P0U4	CXXC1	INM:AR02	-0.174924	13.2419	-0.846507	0.408918	0.86185	-4.92937
P02750	LRG1	INM:AR02	-0.136707	17.3616	-0.846419	0.408965	0.86185	-4.92942
Q9NZJ9	NUDT4	INM:AR02	-0.13837	13.1819	-0.845258	0.409595	0.86185	-4.93011
Q9H2H8	PPIL3	INM:AR02	-0.143669	14.776	-0.844798	0.409845	0.86185	-4.93038
P14625	HSP90B1	INM:AR02	0.121583	16.0259	0.844486	0.410014	0.86185	-4.93056
P78536	ADAM17	INM:AR02	0.141821	11.8079	0.843739	0.410421	0.86185	-4.931
Q16512	PKN1	INM:AR02	0.126198	13.5922	0.841725	0.411517	0.86185	-4.93218
Q2PPJ7	RALGAPA2	INM:AR02	0.12819	14.0049	0.841239	0.411781	0.86185	-4.93246
Q02383	SEMG2	INM:AR02	0.522134	11.3601	0.841218	0.411793	0.86185	-4.93247
P57088	TMEM33	INM:AR02	0.18454	12.8982	0.841122	0.411845	0.86185	-4.93253
Q6NUK1	SLC25A24	INM:AR02	-0.0991777	15.4295	-0.841103	0.411855	0.86185	-4.93254
Q6ZMZ3	SYNE3	INM:AR02	0.167399	12.4875	0.840792	0.412025	0.86185	-4.93272
P69905	HBA1	INM:AR02	-0.142142	16.5143	-0.840301	0.412292	0.86185	-4.93301
P13667	PDIA4	INM:AR02	0.126867	13.9201	0.839515	0.412721	0.861917	-4.93347
P07195	LDHB	INM:AR02	-0.257633	13.4852	-0.837824	0.413645	0.862523	-4.93446
Q99417	MYCBP	INM:AR02	-0.263922	12.0929	-0.837413	0.413869	0.862523	-4.9347
Q9NS69	TOMM22	INM:AR02	0.199318	10.975	0.83637	0.414439	0.862523	-4.9353
P24723	PRKCH	INM:AR02	0.221774	13.8803	0.83608	0.414598	0.862523	-4.93547
Q15907	RAB11B	INM:AR02	0.133213	17.1443	0.832391	0.41662	0.863201	-4.93761
Q9NZ32	ACTR10	INM:AR02	0.116884	12.973	0.831371	0.41718	0.863201	-4.9382
P24752	ACAT1	INM:AR02	-0.284573	13.1799	-0.830668	0.417567	0.863201	-4.93861
P68104	EEF1A1	INM:AR02	0.123239	14.4066	0.830054	0.417904	0.863201	-4.93896
P78368	CSNK1G2	INM:AR02	0.102559	12.9054	0.82911	0.418423	0.863201	-4.93951
Q15027	ACAP1	INM:AR02	0.139783	13.7938	0.82822	0.418914	0.863201	-4.94002
Q5VW32	BROX	INM:AR02	-0.161311	12.5313	-0.828175	0.418939	0.863201	-4.94005
Q9Y3D6	FIS1	INM:AR02	-0.109781	14.738	-0.827744	0.419176	0.863201	-4.9403
P42574	CASP3	INM:AR02	-0.249584	12.4279	-0.826235	0.420008	0.863201	-4.94117
P12259	F5	INM:AR02	-0.164129	13.1346	-0.825992	0.420142	0.863201	-4.94131
Q86WB0	ZC3HC1	INM:AR02	-0.139759	13.4445	-0.824107	0.421183	0.863201	-4.94239
P31949	S100A11	INM:AR02	0.19317	16.8946	0.823852	0.421324	0.863201	-4.94254
Q8N766	EMC1	INM:AR02	0.170937	12.7861	0.823724	0.421395	0.863201	-4.94261
Q2Q1W2	TRIM71	INM:AR02	0.155394	13.6217	0.823403	0.421573	0.863201	-4.94279
Q9NQC3	RTN4	INM:AR02	-0.212494	18.4922	-0.822034	0.42233	0.863201	-4.94358
O14980	XPO1	INM:AR02	0.0998926	13.201	0.820786	0.423022	0.863201	-4.94429
Q8NCG7	DAGLB	INM:AR02	0.150607	14.2118	0.820678	0.423081	0.863201	-4.94435
P13797	PLS3	INM:AR02	-0.137887	19.9542	-0.820636	0.423105	0.863201	-4.94438
P00505	GOT2	INM:AR02	0.206675	12.9716	0.819656	0.423648	0.863201	-4.94494
Q08378	GOLGA3	INM:AR02	0.148628	12.2466	0.81913	0.42394	0.863201	-4.94524
O00764	PDXK	INM:AR02	-0.230421	13.1171	-0.818577	0.424247	0.863201	-4.94556
O75146	HIP1R	INM:AR02	0.161121	14.3375	0.818454	0.424316	0.863201	-4.94563
Q14161	GIT2	INM:AR02	-0.385612	12.9336	-0.816522	0.42539	0.863201	-4.94673
P08574	CYC1	INM:AR02	-0.169805	14.1456	-0.816154	0.425594	0.863201	-4.94694
Q96KR1	ZFR	INM:AR02	0.14455	12.4862	0.815576	0.425916	0.863201	-4.94726
P50851	LRBA	INM:AR02	0.207048	11.848	0.815124	0.426168	0.863201	-4.94752
Q13813	SPTAN1	INM:AR02	0.101719	15.2284	0.814514	0.426508	0.863201	-4.94787
O94979	SEC31A	INM:AR02	-0.0981947	13.1992	-0.814273	0.426642	0.863201	-4.94801
Q16630	CPSF6	INM:AR02	-0.157606	14.2692	-0.813771	0.426922	0.863201	-4.94829
P49748	ACADVL	INM:AR02	0.111679	14.7004	0.813065	0.427315	0.863201	-4.94869
Q13724	MOGS	INM:AR02	0.106378	13.9287	0.812684	0.427528	0.863201	-4.94891
Q9BVK6	TMED9	INM:AR02	0.175427	14.498	0.812501	0.42763	0.863201	-4.94901
Q12907	LMAN2	INM:AR02	0.23912	13.7685	0.810942	0.428501	0.864035	-4.94989
P60903	S100A10	INM:AR02	0.164495	13.6029	0.809878	0.429096	0.864035	-4.9505
P62701	RPS4X	INM:AR02	0.172821	15.9898	0.809628	0.429235	0.864035	-4.95064
Q6PCE3	PGM2L1	INM:AR02	-0.210627	11.7796	-0.80822	0.430024	0.864104	-4.95143
Q9NPA3	MID1IP1	INM:AR02	0.262739	10.8141	0.807938	0.430182	0.864104	-4.95159
O60341	KDM1A	INM:AR02	0.109192	13.1265	0.807237	0.430575	0.864104	-4.95199
Q9NVH2	INTS7	INM:AR02	0.202916	11.3819	0.806345	0.431075	0.864104	-4.95249
P24928	POLR2A	INM:AR02	0.111402	13.0753	0.806021	0.431257	0.864104	-4.95267
P0CG48	UBC	INM:AR02	0.138866	19.5623	0.804471	0.432127	0.86505	-4.95354
P22570	FDXR	INM:AR02	0.105607	13.6108	0.803737	0.43254	0.865051	-4.95395
P49757	NUMB	INM:AR02	0.107265	13.8782	0.802336	0.433328	0.865051	-4.95474
P48382	RFX5	INM:AR02	-0.219938	10.0258	-0.801871	0.43359	0.865051	-4.955
O43920	NDUFS5	INM:AR02	0.147022	11.8454	0.801485	0.433807	0.865051	-4.95522
Q8TAT6	NPLOC4	INM:AR02	-0.123534	12.2631	-0.800935	0.434117	0.865051	-4.95552
Q9NRV9	HEBP1	INM:AR02	-0.186566	12.9578	-0.799507	0.434922	0.865861	-4.95632
Q14240	EIF4A2	INM:AR02	0.19658	11.892	0.797178	0.436237	0.867006	-4.95762
Q9H6T3	RPAP3	INM:AR02	0.211266	10.6863	0.796917	0.436385	0.867006	-4.95777
Q9UK76	JPT1	INM:AR02	0.185551	13.103	0.79637	0.436694	0.867006	-4.95807
P11021	HSPA5	INM:AR02	0.0799522	15.7872	0.795224	0.437342	0.867502	-4.95871
Q86VS8	HOOK3	INM:AR02	-0.1243	13.7227	-0.794484	0.437762	0.867542	-4.95912
P04179	SOD2	INM:AR02	0.107185	16.6011	0.79055	0.439993	0.870733	-4.9613
P38159	RBMX	INM:AR02	-0.114303	14.1194	-0.788789	0.440995	0.870733	-4.96227
Q6ZSR9		INM:AR02	0.122464	13.833	0.788198	0.441331	0.870733	-4.9626
Q9UBQ7	GRHPR	INM:AR02	-0.139221	12.4585	-0.787857	0.441526	0.870733	-4.96279
P56182	RRP1	INM:AR02	-0.0980363	14.0415	-0.786481	0.44231	0.870733	-4.96355
P07954	FH	INM:AR02	0.198012	13.2564	0.78502	0.443143	0.870733	-4.96435
Q9Y371	SH3GLB1	INM:AR02	0.0864943	13.9055	0.784944	0.443186	0.870733	-4.96439
P01889	HLA-B	INM:AR02	0.225376	13.676	0.78458	0.443394	0.870733	-4.96459
Q86YF9	DZIP1	INM:AR02	0.325163	16.1453	0.783871	0.443799	0.870733	-4.96498
Q16854	DGUOK	INM:AR02	-0.213704	12.7566	-0.783219	0.444172	0.870733	-4.96534
P09429	HMGB1	INM:AR02	-0.10211	18.2135	-0.782153	0.444781	0.870733	-4.96592
Q9Y5L4	TIMM13	INM:AR02	-0.248905	10.5431	-0.78211	0.444806	0.870733	-4.96595
Q96AX2	RAB37	INM:AR02	-0.186322	12.3755	-0.7819	0.444926	0.870733	-4.96606
P09651	HNRNPA1	INM:AR02	0.120654	15.3187	0.781551	0.445126	0.870733	-4.96625
O00299	CLIC1	INM:AR02	0.13543	15.1683	0.781108	0.445379	0.870733	-4.96649
Q9H1C4	UNC93B1	INM:AR02	-0.112503	12.8272	-0.778841	0.446679	0.872082	-4.96773
Q13469	NFATC2	INM:AR02	-0.140947	13.0141	-0.777919	0.447208	0.872082	-4.96823
P84085	ARF5	INM:AR02	0.151632	13.588	0.777806	0.447273	0.872082	-4.9683
Q9P0J0	NDUFA13	INM:AR02	-0.19804	11.836	-0.776008	0.448306	0.873313	-4.96928
Q12950	FOXD4	INM:AR02	0.183635	12.7103	0.775055	0.448854	0.873598	-4.96979
Q15904	ATP6AP1	INM:AR02	-0.145413	15.1028	-0.773684	0.449643	0.874299	-4.97054
Q9H8H3	TMT1A	INM:AR02	0.0962563	13.6221	0.773032	0.450019	0.874299	-4.97089
P15531	NME1	INM:AR02	-0.182156	12.3007	-0.771325	0.451003	0.875429	-4.97181
P07332	FES	INM:AR02	0.161699	14.0881	0.77021	0.451646	0.875504	-4.97242
Q6P3S1	DENND1B	INM:AR02	-0.119053	13.8713	-0.769864	0.451847	0.875504	-4.9726
Q15477	SKIC2	INM:AR02	0.212579	10.3795	0.769058	0.452313	0.875626	-4.97304
O43426	SYNJ1	INM:AR02	0.264665	11.5219	0.767915	0.452973	0.876125	-4.97365
Q9NTM9	CUTC	INM:AR02	-0.140628	13.5247	-0.766681	0.453688	0.876727	-4.97432
Q9UPN7	PPP6R1	INM:AR02	0.249665	11.3288	0.764862	0.454742	0.877231	-4.9753
P05204	HMGN2	INM:AR02	0.243875	16.5177	0.7642	0.455126	0.877231	-4.97565
P30050	RPL12	INM:AR02	0.229695	15.5339	0.764143	0.455159	0.877231	-4.97568
O94804	STK10	INM:AR02	-0.101799	14.633	-0.762601	0.456054	0.878177	-4.97651
Q92890	UFD1	INM:AR02	0.106538	15.9174	0.761794	0.456524	0.878303	-4.97694
P13861	PRKAR2A	INM:AR02	-0.131766	11.5751	-0.76028	0.457404	0.879026	-4.97775
Q92608	DOCK2	INM:AR02	0.102832	15.148	0.759758	0.457708	0.879026	-4.97803
Q6PJT7	ZC3H14	INM:AR02	-0.12684	13.18	-0.7583	0.458558	0.879881	-4.9788
P49137	MAPKAPK2	INM:AR02	0.113243	12.4448	0.753755	0.461212	0.883484	-4.98122
A1L390	PLEKHG3	INM:AR02	-0.154385	11.9585	-0.753692	0.461249	0.883484	-4.98125
Q8N3U4	STAG2	INM:AR02	-0.104971	14.4282	-0.75285	0.461741	0.883488	-4.98169
Q6PI78	TMEM65	INM:AR02	-0.195285	11.8637	-0.752301	0.462063	0.883488	-4.98198
Q9BX95	SGPP1	INM:AR02	-0.233244	11.7215	-0.750741	0.462978	0.884458	-4.98281
O60636	TSPAN2	INM:AR02	0.242697	15.2639	0.749028	0.463983	0.885326	-4.98371
O43150	ASAP2	INM:AR02	0.355967	11.1682	0.748579	0.464246	0.885326	-4.98395
P08473	MME	INM:AR02	-0.0966964	16.44	-0.746452	0.465496	0.886898	-4.98506
P22061	PCMT1	INM:AR02	0.176191	13.4761	0.7457	0.465939	0.886898	-4.98546
Q27J81	INF2	INM:AR02	0.0904674	13.7853	0.744109	0.466876	0.886898	-4.98629
O14523	C2CD2L	INM:AR02	-0.0998281	13.0177	-0.743831	0.46704	0.886898	-4.98644
O60869	EDF1	INM:AR02	-0.110143	12.2054	-0.743545	0.467209	0.886898	-4.98659
P63151	PPP2R2A	INM:AR02	-0.250092	13.9148	-0.74302	0.467518	0.886898	-4.98686
P78362	SRPK2	INM:AR02	0.117331	13.3952	0.741534	0.468395	0.887786	-4.98764
P62753	RPS6	INM:AR02	0.129039	17.1955	0.737378	0.470853	0.891668	-4.9898
Q96IJ6	GMPPA	INM:AR02	-0.118106	13.4994	-0.735805	0.471786	0.891925	-4.99062
Q6NZY4	ZCCHC8	INM:AR02	-0.120081	13.725	-0.735765	0.47181	0.891925	-4.99064
Q9Y383	LUC7L2	INM:AR02	-0.287239	10.1842	-0.73385	0.472946	0.893265	-4.99163
Q92598	HSPH1	INM:AR02	0.14384	16.6454	0.733168	0.473351	0.893265	-4.99198
Q99571	P2RX4	INM:AR02	-0.127706	12.1228	-0.732495	0.473751	0.893265	-4.99233
B0I1T2	MYO1G	INM:AR02	0.13149	14.7949	0.729776	0.47537	0.895353	-4.99373
P61244	MAX	INM:AR02	0.290823	11.5443	0.727469	0.476745	0.895353	-4.99491
P39687	ANP32A	INM:AR02	-0.269009	13.6245	-0.726524	0.47731	0.895353	-4.99539
Q9NZU5	LMCD1	INM:AR02	-0.12769	16.2797	-0.724748	0.478371	0.895353	-4.9963
P48507	GCLM	INM:AR02	0.102373	13.8622	0.723557	0.479084	0.895353	-4.99691
P41240	CSK	INM:AR02	0.273843	12.0291	0.723098	0.479358	0.895353	-4.99714
Q9BXP5	SRRT	INM:AR02	-0.0942059	13.8526	-0.72298	0.479429	0.895353	-4.9972
Q13492	PICALM	INM:AR02	0.129058	12.7927	0.721113	0.480548	0.895353	-4.99815
P80188	LCN2	INM:AR02	0.183256	16.3079	0.720539	0.480892	0.895353	-4.99845
O00453	LST1	INM:AR02	-0.0963383	16.2136	-0.72028	0.481047	0.895353	-4.99858
P04083	ANXA1	INM:AR02	0.153819	15.929	0.720202	0.481094	0.895353	-4.99862
Q14315	FLNC	INM:AR02	-0.108567	16.9146	-0.720191	0.481101	0.895353	-4.99862
Q9HAH7	FBRS	INM:AR02	0.160589	11.5926	0.719818	0.481325	0.895353	-4.99881
Q5VYS8	TUT7	INM:AR02	0.158485	11.4034	0.719121	0.481743	0.895353	-4.99916
Q07065	CKAP4	INM:AR02	0.12341	14.4236	0.717598	0.482658	0.895353	-4.99994
Q12906	ILF3	INM:AR02	0.136067	13.6145	0.717566	0.482677	0.895353	-4.99995
O75533	SF3B1	INM:AR02	0.0725921	15.5315	0.717173	0.482914	0.895353	-5.00015
P50552	VASP	INM:AR02	0.124613	14.7276	0.717002	0.483017	0.895353	-5.00024
Q9UBU6	FAM8A1	INM:AR02	0.188688	12.3304	0.715677	0.483814	0.895353	-5.00091
P53671	LIMK2	INM:AR02	0.217987	11.761	0.715208	0.484096	0.895353	-5.00114
Q9H7M9	VSIR	INM:AR02	0.137316	12.4022	0.714681	0.484414	0.895353	-5.00141
O75934	BCAS2	INM:AR02	-0.114856	13.032	-0.714382	0.484594	0.895353	-5.00156
Q53GS9	USP39	INM:AR02	-0.170177	12.1644	-0.712955	0.485454	0.895353	-5.00228
P08134	RHOC	INM:AR02	0.230756	17.555	0.711609	0.486267	0.895353	-5.00296
P08575	PTPRC	INM:AR02	-0.112466	16.9541	-0.7112	0.486514	0.895353	-5.00316
Q9UJY5	GGA1	INM:AR02	-0.121971	14.7767	-0.710387	0.487005	0.895353	-5.00357
Q8NF37	LPCAT1	INM:AR02	-0.0925199	14.9563	-0.710359	0.487022	0.895353	-5.00358
Q13952	NFYC	INM:AR02	0.179947	12.276	0.710326	0.487042	0.895353	-5.0036
Q9BXS5	AP1M1	INM:AR02	0.175616	11.6993	0.709651	0.48745	0.895353	-5.00394
Q13535	ATR	INM:AR02	-0.127753	17.2557	-0.709517	0.487531	0.895353	-5.004
L0R6Q1		INM:AR02	-0.104198	14.5492	-0.708288	0.488275	0.895353	-5.00462
Q6P3W7	SCYL2	INM:AR02	0.203228	10.6226	0.707492	0.488757	0.895353	-5.00502
P63244	RACK1	INM:AR02	0.261508	13.6544	0.707416	0.488802	0.895353	-5.00505
O15031	PLXNB2	INM:AR02	0.224954	11.2904	0.706234	0.489519	0.895353	-5.00564
P20020	ATP2B1	INM:AR02	0.164743	11.6306	0.706077	0.489614	0.895353	-5.00572
Q9BZQ8	NIBAN1	INM:AR02	0.127006	13.6574	0.705311	0.490078	0.895353	-5.0061
Q92575	UBXN4	INM:AR02	0.178453	12.1475	0.705281	0.490097	0.895353	-5.00612
P46926	GNPDA1	INM:AR02	-0.164366	12.3719	-0.704557	0.490536	0.895404	-5.00648
P19367	HK1	INM:AR02	-0.214192	12.7461	-0.700378	0.493076	0.896278	-5.00855
P20292	ALOX5AP	INM:AR02	-0.20638	15.8474	-0.70027	0.493142	0.896278	-5.00861
P08240	SRPRA	INM:AR02	0.103462	12.4063	0.699064	0.493877	0.896278	-5.0092
Q15042	RAB3GAP1	INM:AR02	-0.150446	12.9156	-0.698873	0.493993	0.896278	-5.0093
Q8WXF1	PSPC1	INM:AR02	0.0934497	13.4683	0.698719	0.494087	0.896278	-5.00937
Q16777	H2AC20	INM:AR02	0.204695	9.7118	0.696251	0.495593	0.896278	-5.01059
P62310	LSM3	INM:AR02	-0.140988	13.5456	-0.695809	0.495863	0.896278	-5.01081
P22695	UQCRC2	INM:AR02	0.203732	13.3	0.695473	0.496068	0.896278	-5.01097
Q96P48	ARAP1	INM:AR02	0.0986867	16.4444	0.694064	0.496929	0.896278	-5.01166
P57737	CORO7	INM:AR02	0.0844622	15.8092	0.693485	0.497284	0.896278	-5.01195
Q14019	COTL1	INM:AR02	-0.132313	12.3796	-0.693158	0.497483	0.896278	-5.01211
P01009	SERPINA1	INM:AR02	0.106195	14.4638	0.690533	0.499091	0.896278	-5.01339
Q969V3	NCLN	INM:AR02	-0.189541	10.5842	-0.690197	0.499297	0.896278	-5.01356
Q8WUU5	GATAD1	INM:AR02	-0.11509	11.3013	-0.689818	0.49953	0.896278	-5.01374
P09211	GSTP1	INM:AR02	0.231042	14.753	0.689148	0.499941	0.896278	-5.01407
Q7Z5G4	GOLGA7	INM:AR02	-0.112794	15.6456	-0.688862	0.500116	0.896278	-5.01421
P42785	PRCP	INM:AR02	-0.117726	14.2489	-0.688443	0.500373	0.896278	-5.01441
P62081	RPS7	INM:AR02	0.186859	11.5541	0.688403	0.500398	0.896278	-5.01443
Q9UKY7	CDV3	INM:AR02	-0.175252	11.672	-0.685418	0.502233	0.896278	-5.01588
P51812	RPS6KA3	INM:AR02	0.259887	12.1157	0.684994	0.502494	0.896278	-5.01609
O43776	NARS1	INM:AR02	-0.202957	11.7616	-0.684702	0.502674	0.896278	-5.01623
Q96D71	REPS1	INM:AR02	0.0980074	12.6182	0.683764	0.503252	0.896278	-5.01668
Q13797	ITGA9	INM:AR02	0.170603	11.1595	0.682906	0.50378	0.896278	-5.0171
P23246	SFPQ	INM:AR02	0.070211	15.2071	0.681468	0.504667	0.896278	-5.01779
P11274	BCR	INM:AR02	0.0856585	15.7832	0.679757	0.505723	0.896278	-5.01862
Q9P107	GMIP	INM:AR02	-0.121703	13.1947	-0.679463	0.505905	0.896278	-5.01876
O95865	DDAH2	INM:AR02	0.172145	11.3604	0.679258	0.506032	0.896278	-5.01886
Q8TEQ6	GEMIN5	INM:AR02	-0.166319	12.31	-0.679195	0.506071	0.896278	-5.01889
Q86YB8	ERO1B	INM:AR02	0.0928232	14.3944	0.679121	0.506117	0.896278	-5.01892
Q13546	RIPK1	INM:AR02	0.110501	13.8879	0.679	0.506191	0.896278	-5.01898
P23458	JAK1	INM:AR02	0.0912807	14.7032	0.678739	0.506352	0.896278	-5.01911
P46019	PHKA2	INM:AR02	-0.0933852	14.3778	-0.678525	0.506485	0.896278	-5.01921
Q9Y3Z3	SAMHD1	INM:AR02	0.0973593	16.1402	0.677824	0.506918	0.896278	-5.01955
O75911	DHRS3	INM:AR02	0.163529	11.5753	0.67777	0.506952	0.896278	-5.01957
Q9BZE9	ASPSCR1	INM:AR02	0.108482	12.8363	0.677106	0.507362	0.896278	-5.01989
P16885	PLCG2	INM:AR02	0.0923984	14.8926	0.676818	0.507541	0.896278	-5.02003
O00483	NDUFA4	INM:AR02	0.146773	12.579	0.676236	0.507901	0.896278	-5.02031
P48448		INM:AR02	-0.15653	17.1836	-0.675545	0.508329	0.896278	-5.02064
P62917	RPL8	INM:AR02	0.163175	13.4938	0.675295	0.508484	0.896278	-5.02076
Q03188	CENPC	INM:AR02	0.200259	12.7723	0.674709	0.508847	0.896278	-5.02104
P08621	SNRNP70	INM:AR02	0.159401	14.7044	0.674462	0.509001	0.896278	-5.02116
P60842	EIF4A1	INM:AR02	-0.132274	15.6527	-0.674414	0.50903	0.896278	-5.02118
Q99627	COPS8	INM:AR02	0.102387	12.5762	0.673835	0.50939	0.896278	-5.02146
O95861	BPNT1	INM:AR02	-0.125641	11.6863	-0.672997	0.509909	0.896278	-5.02186
Q9HC35	EML4	INM:AR02	-0.12618	12.6296	-0.672847	0.510003	0.896278	-5.02193
P26440	IVD	INM:AR02	0.114902	12.7903	0.672452	0.510248	0.896278	-5.02212
A0MZ66	SHTN1	INM:AR02	0.165677	11.9238	0.67222	0.510392	0.896278	-5.02223
P35609	ACTN2	INM:AR02	0.24726	12.3588	0.670952	0.51118	0.896937	-5.02283
P08962	CD63	INM:AR02	0.0991215	16.0864	0.668582	0.512654	0.89832	-5.02395
Q9UK41	VPS28	INM:AR02	-0.21187	12.8025	-0.667918	0.513068	0.89832	-5.02427
Q9NYC9	DNAH9	INM:AR02	-0.137322	12.2046	-0.667693	0.513208	0.89832	-5.02437
P14317	HCLS1	INM:AR02	-0.120288	16.0241	-0.663994	0.515515	0.898336	-5.02612
Q9NVJ2	ARL8B	INM:AR02	-0.0822002	17.9553	-0.662796	0.516264	0.898336	-5.02668
P61086	UBE2K	INM:AR02	-0.231618	12.4814	-0.660838	0.517488	0.898336	-5.0276
Q6JQN1	ACAD10	INM:AR02	-0.184008	13.4561	-0.660584	0.517647	0.898336	-5.02772
Q93084	ATP2A3	INM:AR02	-0.088195	17.3291	-0.660397	0.517764	0.898336	-5.02781
P10114	RAP2A	INM:AR02	-0.150239	12.5578	-0.658908	0.518697	0.898336	-5.02851
Q9NUQ9	CYRIB	INM:AR02	0.11601	14.231	0.657816	0.519382	0.898336	-5.02902
P62487	POLR2G	INM:AR02	0.111402	11.9591	0.657588	0.519525	0.898336	-5.02912
A6NDG6	PGP	INM:AR02	-0.112557	12.1442	-0.656397	0.520272	0.898336	-5.02968
Q4KMQ2	ANO6	INM:AR02	-0.158749	12.7401	-0.656309	0.520328	0.898336	-5.02972
Q15233	NONO	INM:AR02	0.136098	13.9819	0.655295	0.520965	0.898336	-5.03019
O75915	ARL6IP5	INM:AR02	-0.11504	16.2766	-0.655139	0.521062	0.898336	-5.03026
Q53GL0	PLEKHO1	INM:AR02	0.137446	11.6109	0.65274	0.522571	0.898336	-5.03138
Q04837	SSBP1	INM:AR02	-0.132854	13.7843	-0.651767	0.523183	0.898336	-5.03183
Q99719	SEPTIN5	INM:AR02	0.164524	14.5334	0.651274	0.523494	0.898336	-5.03206
Q9NVR2	INTS10	INM:AR02	-0.0949122	12.9808	-0.650647	0.52389	0.898336	-5.03235
Q7RTR2	NLRC3	INM:AR02	0.230613	14.2599	0.649824	0.524408	0.898336	-5.03273
P62805	H4C9	INM:AR02	0.23155	18.9034	0.649035	0.524906	0.898336	-5.03309
Q96Q15	SMG1	INM:AR02	-0.159314	12.1178	-0.648491	0.525249	0.898336	-5.03334
Q7Z460	CLASP1	INM:AR02	0.126965	11.7559	0.647479	0.525888	0.898336	-5.03381
O14617	AP3D1	INM:AR02	0.0769002	13.919	0.647329	0.525983	0.898336	-5.03388
Q9UBC2	EPS15L1	INM:AR02	-0.106387	13.1543	-0.646857	0.526281	0.898336	-5.03409
P61160	ACTR2	INM:AR02	-0.101568	17.6088	-0.646569	0.526463	0.898336	-5.03422
Q14696	MESD	INM:AR02	0.105816	12.705	0.646468	0.526527	0.898336	-5.03427
O00560	SDCBP	INM:AR02	0.125095	15.5184	0.64615	0.526728	0.898336	-5.03442
P07099	EPHX1	INM:AR02	0.0793432	13.899	0.646045	0.526794	0.898336	-5.03446
Q17RS7	GEN1	INM:AR02	-0.256684	14.6786	-0.645188	0.527336	0.898336	-5.03486
P62330	ARF6	INM:AR02	-0.0781014	17.1399	-0.644888	0.527526	0.898336	-5.035
P59535	TAS2R40	INM:AR02	0.145695	14.4027	0.644607	0.527704	0.898336	-5.03512
O15357	INPPL1	INM:AR02	0.103129	12.9289	0.644385	0.527844	0.898336	-5.03523
P05141	SLC25A5	INM:AR02	0.22136	13.9408	0.643951	0.528119	0.898336	-5.03542
O00233	PSMD9	INM:AR02	0.107369	13.3927	0.643489	0.528412	0.898336	-5.03564
P04040	CAT	INM:AR02	-0.0743837	16.842	-0.641026	0.529972	0.898336	-5.03676
P00568	AK1	INM:AR02	0.155219	13.0524	0.64084	0.53009	0.898336	-5.03684
Q9H270	VPS11	INM:AR02	0.0947057	13.0556	0.640669	0.530199	0.898336	-5.03692
Q9H098	FAM107B	INM:AR02	0.0893977	12.7995	0.639856	0.530715	0.898336	-5.03729
O75223	GGCT	INM:AR02	-0.180941	12.2097	-0.639008	0.531253	0.898336	-5.03768
O94776	MTA2	INM:AR02	-0.176019	13.2092	-0.638787	0.531394	0.898336	-5.03778
P06753	TPM3	INM:AR02	-0.130187	18.5327	-0.638059	0.531856	0.898336	-5.03811
Q66K74	MAP1S	INM:AR02	0.0796303	14.0993	0.635823	0.533278	0.898336	-5.03912
P61313	RPL15	INM:AR02	-0.19032	13.619	-0.634953	0.533832	0.898336	-5.03951
Q9H3Z4	DNAJC5	INM:AR02	-0.149997	10.8559	-0.632999	0.535078	0.898336	-5.04039
Q99714	HSD17B10	INM:AR02	-0.251253	12.0981	-0.632893	0.535145	0.898336	-5.04044
Q16637	SMN1	INM:AR02	0.247061	10.2182	0.632405	0.535456	0.898336	-5.04066
Q6I9Y2	THOC7	INM:AR02	0.164885	11.8154	0.631437	0.536074	0.898336	-5.0411
Q9UBW5	BIN2	INM:AR02	0.144676	13.7309	0.631305	0.536159	0.898336	-5.04116
P11234	RALB	INM:AR02	0.191892	12.2828	0.6312	0.536225	0.898336	-5.0412
Q9HBH0	RHOF	INM:AR02	-0.165809	13.0001	-0.631019	0.536341	0.898336	-5.04128
Q567U6	CCDC93	INM:AR02	-0.0937558	13.1808	-0.63099	0.536359	0.898336	-5.0413
Q9H3N1	TMX1	INM:AR02	-0.0776063	15.8868	-0.630653	0.536575	0.898336	-5.04145
P46976	GYG1	INM:AR02	-0.146636	14.0297	-0.630574	0.536625	0.898336	-5.04148
Q9P015	MRPL15	INM:AR02	0.201218	11.353	0.630563	0.536632	0.898336	-5.04149
Q7Z6P3		INM:AR02	0.110026	13.6039	0.6289	0.537695	0.898336	-5.04223
P30044	PRDX5	INM:AR02	0.240851	16.2206	0.628495	0.537954	0.898336	-5.04242
P12724	RNASE3	INM:AR02	-0.118939	19.9395	-0.62786	0.53836	0.898336	-5.0427
Q13033	STRN3	INM:AR02	-0.124259	11.6422	-0.627801	0.538398	0.898336	-5.04273
P48595	SERPINB10	INM:AR02	-0.0880147	15.2338	-0.626726	0.539086	0.898336	-5.04321
Q04759	PRKCQ	INM:AR02	0.204421	13.8768	0.626106	0.539483	0.898336	-5.04348
Q9BXS9	SLC26A6	INM:AR02	0.123163	17.2798	0.625643	0.539779	0.898336	-5.04369
P61289	PSME3	INM:AR02	-0.133283	12.406	-0.625261	0.540024	0.898336	-5.04386
Q9Y490	TLN1	INM:AR02	0.0814097	16.7489	0.625088	0.540135	0.898336	-5.04394
P02765	AHSG	INM:AR02	0.169342	14.1103	0.624859	0.540282	0.898336	-5.04404
Q86WT1	IFT70A	INM:AR02	-0.296897	11.8824	-0.624857	0.540283	0.898336	-5.04404
Q5HYW2		INM:AR02	-0.0788438	14.0925	-0.623659	0.541052	0.898336	-5.04457
Q96D96	HVCN1	INM:AR02	0.207912	17.6579	0.622866	0.541561	0.898336	-5.04492
P55957	BID	INM:AR02	-0.112119	12.8218	-0.622695	0.54167	0.898336	-5.045
P07948	LYN	INM:AR02	0.0712449	16.5082	0.622309	0.541918	0.898336	-5.04517
Q9UM54	MYO6	INM:AR02	0.246722	15.2315	0.621783	0.542256	0.898336	-5.0454
P29966	MARCKS	INM:AR02	0.142172	11.5478	0.621549	0.542406	0.898336	-5.04551
Q9C0K0	BCL11B	INM:AR02	-0.150673	11.7356	-0.621422	0.542488	0.898336	-5.04556
O75439	PMPCB	INM:AR02	0.107762	13.4851	0.61992	0.543453	0.898336	-5.04623
P14314	PRKCSH	INM:AR02	0.0699317	14.7603	0.619857	0.543494	0.898336	-5.04625
Q12982	BNIP2	INM:AR02	0.132913	12.1056	0.619247	0.543887	0.898336	-5.04652
P04632	CAPNS1	INM:AR02	0.128209	14.4792	0.618616	0.544292	0.898336	-5.0468
P58335	ANTXR2	INM:AR02	0.0928668	15.4167	0.618532	0.544346	0.898336	-5.04684
O95684	CEP43	INM:AR02	0.10622	12.2628	0.617951	0.54472	0.898336	-5.04709
Q14134	TRIM29	INM:AR02	0.139818	12.4348	0.617153	0.545235	0.898336	-5.04744
P14868	DARS1	INM:AR02	-0.0918055	15.3786	-0.616526	0.545638	0.898336	-5.04772
Q562E7	WDR81	INM:AR02	-0.0698457	14.2102	-0.616181	0.545861	0.898336	-5.04787
Q9Y4L1	HYOU1	INM:AR02	0.0777717	13.4292	0.614418	0.546998	0.898439	-5.04864
Q8NFD5	ARID1B	INM:AR02	-0.192954	9.48973	-0.614063	0.547227	0.898439	-5.0488
P36222	CHI3L1	INM:AR02	0.104965	13.5087	0.614063	0.547227	0.898439	-5.0488
Q12968	NFATC3	INM:AR02	0.15925	10.6039	0.613522	0.547577	0.898439	-5.04904
Q9UN37	VPS4A	INM:AR02	0.182999	12.9987	0.61132	0.548999	0.899	-5.05
O60884	DNAJA2	INM:AR02	-0.106714	12.2293	-0.611188	0.549084	0.899	-5.05005
O00330	PDHX	INM:AR02	-0.0958684	12.3996	-0.611072	0.549159	0.899	-5.05011
Q9BYP7	WNK3	INM:AR02	-0.178373	13.6054	-0.608693	0.550699	0.900183	-5.05114
O95295	SNAPIN	INM:AR02	0.184212	11.7824	0.608677	0.55071	0.900183	-5.05115
Q92609	TBC1D5	INM:AR02	0.0868559	13.0954	0.607346	0.551573	0.900842	-5.05172
Q5W0V3	FHIP2A	INM:AR02	0.136866	11.4061	0.606776	0.551942	0.900842	-5.05197
P29597	TYK2	INM:AR02	-0.106343	13.6904	-0.605836	0.552552	0.901161	-5.05238
Q9NZT1	CALML5	INM:AR02	0.318025	8.9948	0.603794	0.553877	0.901725	-5.05326
O15144	ARPC2	INM:AR02	0.169823	14.9981	0.603395	0.554136	0.901725	-5.05343
P09497	CLTB	INM:AR02	0.129703	13.8232	0.603387	0.554142	0.901725	-5.05343
Q08945	SSRP1	INM:AR02	-0.0783407	14.7805	-0.601167	0.555586	0.903398	-5.05439
Q8WUM4	PDCD6IP	INM:AR02	0.0762593	15.9244	0.600448	0.556054	0.903483	-5.05469
Q9UHV9	PFDN2	INM:AR02	-0.090701	13.7656	-0.599185	0.556876	0.903557	-5.05523
P53367	ARFIP1	INM:AR02	-0.0943729	13.4835	-0.598634	0.557235	0.903557	-5.05547
P20585	MSH3	INM:AR02	-0.121777	11.7953	-0.598018	0.557637	0.903557	-5.05573
Q8TBE9	NANP	INM:AR02	-0.228283	10.6499	-0.597568	0.557931	0.903557	-5.05592
Q9BUV8	RAB5IF	INM:AR02	0.0995211	14.0005	0.596584	0.558573	0.903557	-5.05634
O60271	SPAG9	INM:AR02	-0.0923429	11.9188	-0.595703	0.559148	0.903557	-5.05672
Q92734	TFG	INM:AR02	0.243451	10.3779	0.595012	0.559599	0.903557	-5.05701
Q14653	IRF3	INM:AR02	-0.0827896	14.8589	-0.594847	0.559707	0.903557	-5.05708
O15120	AGPAT2	INM:AR02	0.0765951	14.8579	0.594294	0.560068	0.903557	-5.05732
P62979	RPS27A	INM:AR02	-0.139994	12.6222	-0.592748	0.561079	0.903557	-5.05797
P50570	DNM2	INM:AR02	0.124782	15.0305	0.592262	0.561397	0.903557	-5.05818
Q8NBJ7	SUMF2	INM:AR02	-0.118438	12.4259	-0.592142	0.561475	0.903557	-5.05823
P17931	LGALS3	INM:AR02	-0.176335	14.1769	-0.592101	0.561502	0.903557	-5.05825
O95479	H6PD	INM:AR02	0.0743309	14.8962	0.590236	0.562723	0.904662	-5.05903
Q6JBY9	RCSD1	INM:AR02	0.115481	15.7542	0.589125	0.563452	0.904662	-5.0595
P11387	TOP1	INM:AR02	-0.0895665	11.9346	-0.588283	0.564004	0.904662	-5.05985
Q15386	UBE3C	INM:AR02	-0.10079	13.1851	-0.586862	0.564936	0.904662	-5.06045
P11177	PDHB	INM:AR02	-0.0871756	16.1026	-0.586389	0.565247	0.904662	-5.06065
Q5T1M5	FKBP15	INM:AR02	-0.139477	12.413	-0.58603	0.565483	0.904662	-5.0608
P17858	PFKL	INM:AR02	0.0687144	15.3267	0.584275	0.566636	0.904662	-5.06153
P29590	PML	INM:AR02	0.135269	12.99	0.583973	0.566835	0.904662	-5.06166
Q969Q4	ARL11	INM:AR02	0.096005	12.9039	0.583693	0.567019	0.904662	-5.06178
O94888	UBXN7	INM:AR02	-0.11921	12.2834	-0.583313	0.567269	0.904662	-5.06193
P31146	CORO1A	INM:AR02	0.121772	15.4147	0.583027	0.567457	0.904662	-5.06205
Q8N8E3	CEP112	INM:AR02	0.108632	12.98	0.583013	0.567466	0.904662	-5.06206
O75976	CPD	INM:AR02	-0.105207	12.3256	-0.582813	0.567598	0.904662	-5.06214
Q86UY8	NT5DC3	INM:AR02	-0.238884	12.254	-0.581179	0.568674	0.905214	-5.06282
Q68DU8	KCTD16	INM:AR02	-0.0976828	14.3908	-0.581022	0.568777	0.905214	-5.06289
Q00765	REEP5	INM:AR02	0.0875865	14.6369	0.579015	0.5701	0.905592	-5.06372
Q9BTV4	TMEM43	INM:AR02	-0.0872355	15.328	-0.57892	0.570163	0.905592	-5.06376
Q7Z4H7	HAUS6	INM:AR02	-0.16607	12.6278	-0.578766	0.570265	0.905592	-5.06382
Q6WKZ4	RAB11FIP1	INM:AR02	-0.0728801	14.5318	-0.577057	0.571393	0.906721	-5.06453
Q96HY6	DDRGK1	INM:AR02	-0.0897799	14.007	-0.576064	0.572049	0.9071	-5.06494
Q9UPN9	TRIM33	INM:AR02	0.102624	14.8138	0.574996	0.572755	0.907496	-5.06538
Q13404	UBE2V1	INM:AR02	-0.101029	15.3436	-0.573792	0.573551	0.907496	-5.06587
P31948	STIP1	INM:AR02	-0.0815477	15.8022	-0.573063	0.574034	0.907496	-5.06617
Q96SY0	INTS14	INM:AR02	-0.123434	11.9864	-0.572639	0.574314	0.907496	-5.06634
O75019	LILRA1	INM:AR02	0.0881681	15.084	0.572118	0.574659	0.907496	-5.06656
Q96FS4	SIPA1	INM:AR02	-0.0742853	14.5671	-0.571794	0.574874	0.907496	-5.06669
P23786	CPT2	INM:AR02	0.10941	13.016	0.570898	0.575468	0.907496	-5.06706
O75947	ATP5PD	INM:AR02	-0.122361	14.827	-0.570642	0.575638	0.907496	-5.06716
Q9NRL3	STRN4	INM:AR02	0.10065	12.383	0.57	0.576063	0.907508	-5.06742
Q03252	LMNB2	INM:AR02	0.0748235	15.1715	0.567997	0.577392	0.908391	-5.06824
O94886	TMEM63A	INM:AR02	0.0673812	13.4146	0.567285	0.577866	0.908391	-5.06853
Q9Y484	WDR45	INM:AR02	-0.0999845	12.2424	-0.566989	0.578062	0.908391	-5.06865
P38117	ETFB	INM:AR02	-0.217479	12.9724	-0.566639	0.578295	0.908391	-5.06879
Q86WJ1	CHD1L	INM:AR02	0.208534	11.8413	0.565618	0.578973	0.908605	-5.0692
Q9Y5M8	SRPRB	INM:AR02	-0.0806333	13.1506	-0.565176	0.579267	0.908605	-5.06938
P31040	SDHA	INM:AR02	0.130436	12.2991	0.563333	0.580494	0.909872	-5.07012
Q96N46	TTC14	INM:AR02	0.107568	13.2585	0.562524	0.581033	0.910061	-5.07045
Q9Y496	KIF3A	INM:AR02	0.067888	15.5811	0.561521	0.581701	0.910451	-5.07085
A0FGR8	ESYT2	INM:AR02	-0.0764649	12.3389	-0.559672	0.582934	0.91107	-5.0716
P54289	CACNA2D1	INM:AR02	-0.138674	11.1176	-0.559121	0.583301	0.91107	-5.07182
O60216	RAD21	INM:AR02	-0.0800206	14.7816	-0.558487	0.583724	0.91107	-5.07207
Q5D862	FLG2	INM:AR02	-0.240434	10.5161	-0.558416	0.583772	0.91107	-5.0721
Q9UPQ9	TNRC6B	INM:AR02	-0.121894	10.4248	-0.556654	0.58495	0.912253	-5.0728
Q14697	GANAB	INM:AR02	0.0919154	17.7037	0.554971	0.586075	0.912461	-5.07347
P30153	PPP2R1A	INM:AR02	0.0744063	14.7133	0.554859	0.58615	0.912461	-5.07352
P23588	EIF4B	INM:AR02	-0.0993618	12.9715	-0.554572	0.586342	0.912461	-5.07363
Q92945	KHSRP	INM:AR02	-0.0709964	16.5199	-0.553817	0.586847	0.912593	-5.07393
Q9UBF8	PI4KB	INM:AR02	-0.202527	9.80105	-0.552395	0.5878	0.912729	-5.07449
Q00169	PITPNA	INM:AR02	-0.186999	13.0567	-0.551949	0.588099	0.912729	-5.07467
O75347	TBCA	INM:AR02	0.0974336	14.1126	0.551491	0.588405	0.912729	-5.07485
O00192	ARVCF	INM:AR02	-0.0877695	12.8513	-0.551013	0.588726	0.912729	-5.07504
P30101	PDIA3	INM:AR02	0.0641923	16.2866	0.549104	0.590007	0.912729	-5.07579
Q8TEH3	DENND1A	INM:AR02	-0.0995971	11.8995	-0.548982	0.590089	0.912729	-5.07584
Q9UPU5	USP24	INM:AR02	-0.0704575	12.6614	-0.548853	0.590176	0.912729	-5.07589
P01040	CSTA	INM:AR02	-0.108461	14.4199	-0.548658	0.590307	0.912729	-5.07597
A5A3E0	POTEF	INM:AR02	0.181605	20.5858	0.547376	0.591167	0.912729	-5.07647
Q9UQE7	SMC3	INM:AR02	-0.0743655	13.8299	-0.547088	0.591361	0.912729	-5.07658
Q96Q05	TRAPPC9	INM:AR02	0.0781736	12.4786	0.546787	0.591563	0.912729	-5.0767
Q9Y295	DRG1	INM:AR02	-0.109991	11.7773	-0.546179	0.591972	0.912729	-5.07694
Q92900	UPF1	INM:AR02	0.0657994	13.085	0.545065	0.592721	0.913236	-5.07738
P46940	IQGAP1	INM:AR02	0.0714784	15.9298	0.543424	0.593826	0.914261	-5.07802
O75427	LRCH4	INM:AR02	-0.0755556	12.3068	-0.542828	0.594227	0.914261	-5.07825
P62826	RAN	INM:AR02	0.135719	14.9167	0.541078	0.595407	0.915009	-5.07893
Q9UQ35	SRRM2	INM:AR02	-0.0766032	12.3639	-0.540611	0.595722	0.915009	-5.07911
Q6DD88	ATL3	INM:AR02	0.0797356	14.5491	0.540171	0.596019	0.915009	-5.07928
A0AV96	RBM47	INM:AR02	-0.106864	13.3482	-0.53961	0.596397	0.915009	-5.0795
P15311	EZR	INM:AR02	0.117973	17.2143	0.538176	0.597366	0.915402	-5.08005
O15211	RGL2	INM:AR02	-0.147897	11.076	-0.537622	0.59774	0.915402	-5.08026
Q13098	GPS1	INM:AR02	0.121678	11.7943	0.53736	0.597917	0.915402	-5.08037
Q6F5E8	CARMIL2	INM:AR02	-0.0915762	11.8703	-0.534548	0.599819	0.917658	-5.08145
Q13613	MTMR1	INM:AR02	-0.0870621	12.6881	-0.533934	0.600234	0.917658	-5.08168
Q6UWP7	LCLAT1	INM:AR02	0.0899538	13.0115	0.531079	0.602169	0.919169	-5.08277
Q8IZP2		INM:AR02	-0.113765	13.3256	-0.530233	0.602743	0.919169	-5.08309
P50750	CDK9	INM:AR02	0.146087	12.328	0.529145	0.603482	0.919169	-5.08351
Q15843	NEDD8	INM:AR02	-0.0971485	15.0593	-0.527996	0.604262	0.919169	-5.08394
Q9P270	SLAIN2	INM:AR02	0.0786623	12.0691	0.526956	0.604969	0.919169	-5.08434
P35606	COPB2	INM:AR02	-0.0630769	15.5613	-0.526573	0.605229	0.919169	-5.08448
Q5TDH0	DDI2	INM:AR02	0.100902	13.2149	0.525832	0.605733	0.919169	-5.08476
P05091	ALDH2	INM:AR02	-0.0790475	15.3964	-0.525384	0.606038	0.919169	-5.08493
Q8WVR3	TRAPPC14	INM:AR02	-0.0986332	12.0932	-0.524621	0.606557	0.919169	-5.08522
Q5T200	ZC3H13	INM:AR02	-0.104237	13.8455	-0.523764	0.60714	0.919169	-5.08554
P13473	LAMP2	INM:AR02	0.0807486	17.3451	0.523722	0.607168	0.919169	-5.08556
P43243	MATR3	INM:AR02	-0.0615575	14.5817	-0.52368	0.607197	0.919169	-5.08557
Q16514	TAF12	INM:AR02	0.106018	12.3942	0.52347	0.60734	0.919169	-5.08565
Q9Y2B0	CNPY2	INM:AR02	0.116165	13.2965	0.522867	0.607751	0.919169	-5.08588
O60825	PFKFB2	INM:AR02	0.109409	14.0281	0.522103	0.608271	0.919169	-5.08617
Q9HA77	CARS2	INM:AR02	-0.152344	11.1996	-0.521829	0.608458	0.919169	-5.08627
Q63HN8	RNF213	INM:AR02	0.0565591	13.448	0.521791	0.608484	0.919169	-5.08628
P0DOX7		INM:AR02	-0.155485	10.1066	-0.521279	0.608833	0.919169	-5.08647
Q6ZT62		INM:AR02	0.0785245	13.6701	0.520313	0.609492	0.91919	-5.08684
Q8IXQ4	GPALPP1	INM:AR02	-0.0901313	11.6862	-0.519162	0.610277	0.91919	-5.08727
Q8TB03	CXorf38	INM:AR02	0.0852092	13.6658	0.518712	0.610584	0.91919	-5.08743
P67870	CSNK2B	INM:AR02	0.0817993	14.1301	0.51844	0.61077	0.91919	-5.08753
Q9Y639	NPTN	INM:AR02	-0.18433	11.7988	-0.517609	0.611338	0.91919	-5.08784
Q07960	ARHGAP1	INM:AR02	0.240825	13.5256	0.517542	0.611384	0.91919	-5.08787
Q99943	AGPAT1	INM:AR02	-0.113377	14.2463	-0.515636	0.612686	0.919807	-5.08858
Q9H3K2	GHITM	INM:AR02	0.0793687	13.3894	0.515615	0.612701	0.919807	-5.08858
Q9BUJ2	HNRNPUL1	INM:AR02	0.0874073	11.4223	0.515085	0.613063	0.919807	-5.08878
P62993	GRB2	INM:AR02	0.057163	15.9444	0.513211	0.614346	0.921096	-5.08947
Q9Y262	EIF3L	INM:AR02	0.0763663	13.1754	0.511315	0.615645	0.922407	-5.09017
P07910	HNRNPC	INM:AR02	-0.0815202	15.0511	-0.509114	0.617155	0.923628	-5.09098
P40121	CAPG	INM:AR02	0.0798391	15.2784	0.508359	0.617673	0.923628	-5.09125
P23743	DGKA	INM:AR02	-0.0635849	15.0105	-0.50714	0.61851	0.923628	-5.0917
P57721	PCBP3	INM:AR02	0.109432	14.9903	0.506042	0.619264	0.923628	-5.0921
P23919	DTYMK	INM:AR02	-0.0947988	12.3006	-0.505381	0.619719	0.923628	-5.09234
Q96PK6	RBM14	INM:AR02	-0.0752838	14.4393	-0.504923	0.620034	0.923628	-5.0925
P11678	EPX	INM:AR02	0.091702	17.114	0.5049	0.62005	0.923628	-5.09251
Q13586	STIM1	INM:AR02	0.0534045	14.436	0.504594	0.62026	0.923628	-5.09262
P42167	TMPO	INM:AR02	0.0746012	15.8042	0.50251	0.621695	0.923628	-5.09338
P05362	ICAM1	INM:AR02	0.110452	12.422	0.501873	0.622133	0.923628	-5.09361
Q6P2E9	EDC4	INM:AR02	-0.0706282	13.3344	-0.501242	0.622568	0.923628	-5.09384
P55795	HNRNPH2	INM:AR02	0.128891	12.1146	0.501182	0.62261	0.923628	-5.09386
P16949	STMN1	INM:AR02	-0.0635491	18.4648	-0.498695	0.624324	0.923628	-5.09475
P68402	PAFAH1B2	INM:AR02	-0.070323	12.6406	-0.498277	0.624613	0.923628	-5.0949
Q9P2D1	CHD7	INM:AR02	-0.0855717	15.8885	-0.497384	0.625229	0.923628	-5.09522
Q9H4E7	DEF6	INM:AR02	-0.0796875	15.9796	-0.496632	0.625749	0.923628	-5.09549
Q9HCU9	BRMS1	INM:AR02	0.113919	11.4985	0.495641	0.626434	0.923628	-5.09584
Q16539	MAPK14	INM:AR02	0.13282	14.4961	0.495481	0.626544	0.923628	-5.0959
P62714	PPP2CB	INM:AR02	0.151834	11.2493	0.494421	0.627277	0.923628	-5.09628
Q9BSL1	UBAC1	INM:AR02	-0.0934517	14.1405	-0.493623	0.627829	0.923628	-5.09656
E9PAV3		INM:AR02	-0.157537	10.9803	-0.492272	0.628764	0.923628	-5.09704
Q13148	TARDBP	INM:AR02	-0.0883317	13.8794	-0.491841	0.629063	0.923628	-5.09719
Q6P4E1	GOLM2	INM:AR02	-0.0768265	12.2262	-0.491703	0.629158	0.923628	-5.09724
P48735	IDH2	INM:AR02	0.0729778	14.9715	0.491699	0.629161	0.923628	-5.09724
Q16555	DPYSL2	INM:AR02	0.0707976	15.1526	0.491602	0.629228	0.923628	-5.09728
Q96F07	CYFIP2	INM:AR02	0.11281	14.2982	0.491223	0.629491	0.923628	-5.09741
Q9UJZ1	STOML2	INM:AR02	-0.0895531	14.5318	-0.49032	0.630116	0.923628	-5.09773
Q7Z5L2	R3HCC1L	INM:AR02	-0.13246	12.3209	-0.490281	0.630143	0.923628	-5.09775
P08311	CTSG	INM:AR02	-0.0908182	21.6052	-0.488791	0.631177	0.923628	-5.09827
P10253	GAA	INM:AR02	0.130815	11.9799	0.488731	0.631218	0.923628	-5.09829
Q9BVA1	TUBB2B	INM:AR02	-0.0552589	14.6294	-0.487894	0.631799	0.923628	-5.09859
Q7Z4Q2	HEATR3	INM:AR02	0.112181	14.7262	0.487686	0.631943	0.923628	-5.09866
O94826	TOMM70	INM:AR02	0.146495	12.0083	0.487634	0.631979	0.923628	-5.09868
O94874	UFL1	INM:AR02	0.0902393	12.9133	0.48683	0.632537	0.923628	-5.09896
P31483	TIA1	INM:AR02	-0.0960744	13.6711	-0.485747	0.633289	0.923628	-5.09934
P22670	RFX1	INM:AR02	-0.0674464	13.4303	-0.485272	0.633619	0.923628	-5.09951
Q7Z7A1	CNTRL	INM:AR02	-0.178047	11.9798	-0.483557	0.634811	0.923628	-5.1001
Q8WUZ0	BCL7C	INM:AR02	0.130936	11.2324	0.482712	0.635399	0.923628	-5.1004
Q5GLZ8	HERC4	INM:AR02	0.0917382	12.1139	0.482551	0.635511	0.923628	-5.10045
Q92673	SORL1	INM:AR02	0.0470976	16.0376	0.48209	0.635832	0.923628	-5.10061
O95299	NDUFA10	INM:AR02	-0.0652852	13.8577	-0.482072	0.635844	0.923628	-5.10062
Q92499	DDX1	INM:AR02	0.0883588	13.1959	0.482035	0.635871	0.923628	-5.10063
P61601	NCALD	INM:AR02	-0.262844	12.3183	-0.480626	0.636851	0.923628	-5.10112
Q9H0F6	SHARPIN	INM:AR02	0.123984	11.9437	0.48051	0.636932	0.923628	-5.10116
Q8TEM1	NUP210	INM:AR02	-0.0728246	13.7672	-0.480345	0.637047	0.923628	-5.10122
Q93050	ATP6V0A1	INM:AR02	0.0650423	15.2969	0.480275	0.637095	0.923628	-5.10124
Q9UPT5	EXOC7	INM:AR02	0.0644577	12.9753	0.479879	0.637371	0.923628	-5.10138
O14497	ARID1A	INM:AR02	-0.0828173	12.4248	-0.479678	0.637512	0.923628	-5.10145
P61586	RHOA	INM:AR02	0.103376	14.6294	0.479624	0.637549	0.923628	-5.10147
P05107	ITGB2	INM:AR02	0.0775709	18.1707	0.47861	0.638256	0.923628	-5.10182
P54709	ATP1B3	INM:AR02	0.0608359	14.4482	0.478026	0.638663	0.923628	-5.10202
P0CG12		INM:AR02	-0.0539855	14.0946	-0.477728	0.638871	0.923628	-5.10212
Q8N4C6	NIN	INM:AR02	0.178064	17.4956	0.477576	0.638977	0.923628	-5.10217
P21127	CDK11B	INM:AR02	0.0991569	12.328	0.476019	0.640063	0.923815	-5.10271
P13727	PRG2	INM:AR02	0.228642	15.2674	0.475595	0.64036	0.923815	-5.10285
P18669	PGAM1	INM:AR02	-0.109987	14.0056	-0.475148	0.640672	0.923815	-5.10301
Q13045	FLII	INM:AR02	-0.0541038	14.5243	-0.474942	0.640815	0.923815	-5.10308
Q96AA3	RFT1	INM:AR02	0.0963461	14.5625	0.474346	0.641231	0.923815	-5.10328
P51531	SMARCA2	INM:AR02	-0.104483	11.5032	-0.472757	0.642342	0.924803	-5.10382
Q15022	SUZ12	INM:AR02	-0.149511	12.9882	-0.470117	0.64419	0.926848	-5.10472
Q92614	MYO18A	INM:AR02	-0.0575083	14.6255	-0.46571	0.647278	0.928926	-5.10621
Q15398	DLGAP5	INM:AR02	-0.0835638	11.7198	-0.465144	0.647675	0.928926	-5.1064
P61626	LYZ	INM:AR02	-0.115028	16.8346	-0.465036	0.647751	0.928926	-5.10643
Q9NRF8	CTPS2	INM:AR02	-0.0870407	11.9881	-0.464942	0.647817	0.928926	-5.10647
O75874	IDH1	INM:AR02	0.0641458	15.3577	0.464922	0.647831	0.928926	-5.10647
Q13242	SRSF9	INM:AR02	0.120132	12.2386	0.461578	0.65018	0.928926	-5.10759
P21283	ATP6V1C1	INM:AR02	0.078727	13.4596	0.460463	0.650964	0.928926	-5.10796
Q9NTZ6	RBM12	INM:AR02	0.0662051	13.197	0.459859	0.651389	0.928926	-5.10816
Q14764	MVP	INM:AR02	0.0609874	15.647	0.459603	0.651569	0.928926	-5.10825
P37837	TALDO1	INM:AR02	-0.068975	15.2063	-0.459535	0.651617	0.928926	-5.10827
Q15154	PCM1	INM:AR02	-0.0574679	16.1182	-0.458721	0.65219	0.928926	-5.10854
Q8NEY8	PPHLN1	INM:AR02	0.138224	12.1735	0.458661	0.652232	0.928926	-5.10856
P61009	SPCS3	INM:AR02	-0.20083	14.6998	-0.458338	0.652459	0.928926	-5.10866
A6NHR9	SMCHD1	INM:AR02	0.0624815	13.5672	0.4583	0.652486	0.928926	-5.10868
Q9NW15	ANO10	INM:AR02	-0.0707466	13.3591	-0.45794	0.652739	0.928926	-5.1088
Q9BUL8	PDCD10	INM:AR02	-0.1004	13.1228	-0.457854	0.6528	0.928926	-5.10882
Q9NR19	ACSS2	INM:AR02	0.07663	12.3752	0.456896	0.653475	0.928926	-5.10914
P07339	CTSD	INM:AR02	0.0483237	15.3359	0.456804	0.65354	0.928926	-5.10917
Q9Y2I7	PIKFYVE	INM:AR02	0.100925	12.9576	0.456218	0.653953	0.928926	-5.10936
O95831	AIFM1	INM:AR02	0.099752	12.3557	0.455882	0.65419	0.928926	-5.10947
Q71DI3	H3C14	INM:AR02	0.0703551	18.5772	0.455291	0.654606	0.928926	-5.10967
Q07666	KHDRBS1	INM:AR02	0.0628884	13.2439	0.453679	0.655743	0.929932	-5.1102
Q09472	EP300	INM:AR02	0.0792922	15.1285	0.451743	0.65711	0.930707	-5.11083
Q3LXA3	TKFC	INM:AR02	0.183452	8.82202	0.451207	0.657489	0.930707	-5.111
P54619	PRKAG1	INM:AR02	-0.0534397	13.5468	-0.450899	0.657707	0.930707	-5.11111
O00267	SUPT5H	INM:AR02	-0.0757873	12.2933	-0.45048	0.658002	0.930707	-5.11124
P49903	SEPHS1	INM:AR02	-0.0834732	12.5258	-0.449656	0.658585	0.930926	-5.11151
Q13428	TCOF1	INM:AR02	0.121067	11.3461	0.446501	0.660818	0.932215	-5.11253
Q86VX2	COMMD7	INM:AR02	0.0578427	13.3788	0.443718	0.662789	0.932215	-5.11342
O75534	CSDE1	INM:AR02	0.0881628	11.9755	0.443664	0.662827	0.932215	-5.11344
Q9Y520	PRRC2C	INM:AR02	0.0937779	12.8992	0.4436	0.662873	0.932215	-5.11346
Q9BX10	GTPBP2	INM:AR02	0.1462	11.8811	0.442811	0.663432	0.932215	-5.11371
P07237	P4HB	INM:AR02	0.0570189	18.4191	0.44281	0.663433	0.932215	-5.11371
Q96C86	DCPS	INM:AR02	0.0704649	12.9806	0.442783	0.663452	0.932215	-5.11372
P28065	PSMB9	INM:AR02	0.124482	13.4246	0.442426	0.663705	0.932215	-5.11384
Q9BRT3	MIEN1	INM:AR02	-0.0663299	13.2392	-0.442365	0.663749	0.932215	-5.11386
P04439	HLA-A	INM:AR02	0.125793	12.4385	0.442313	0.663785	0.932215	-5.11387
O15198	SMAD9	INM:AR02	0.0676313	14.7498	0.441175	0.664594	0.932497	-5.11424
P06748	NPM1	INM:AR02	-0.113144	12.7367	-0.440822	0.664844	0.932497	-5.11435
Q86Y82	STX12	INM:AR02	0.0756395	12.0968	0.439257	0.665956	0.933138	-5.11485
P04066	FUCA1	INM:AR02	-0.0952112	12.1458	-0.438501	0.666493	0.933138	-5.11509
Q6ZNJ1	NBEAL2	INM:AR02	0.0592854	13.9498	0.438313	0.666626	0.933138	-5.11515
Q96AQ6	PBXIP1	INM:AR02	0.0613779	14.5111	0.43753	0.667183	0.933138	-5.11539
P78347	GTF2I	INM:AR02	0.0666219	12.7633	0.436371	0.668007	0.933138	-5.11576
Q9Y2G3	ATP11B	INM:AR02	0.0859157	13.0554	0.435183	0.668852	0.933138	-5.11613
P20700	LMNB1	INM:AR02	0.0743824	16.5713	0.434174	0.669571	0.933138	-5.11645
Q14643	ITPR1	INM:AR02	-0.0667075	16.3284	-0.43402	0.669681	0.933138	-5.1165
P55160	NCKAP1L	INM:AR02	-0.0552971	16.9139	-0.433842	0.669807	0.933138	-5.11655
Q96KP1	EXOC2	INM:AR02	-0.0621944	13.4976	-0.432896	0.670481	0.933138	-5.11685
Q8TE02	ELP5	INM:AR02	0.0881832	12.2361	0.432437	0.670808	0.933138	-5.11699
Q14689	DIP2A	INM:AR02	-0.0870258	11.6855	-0.432012	0.671111	0.933138	-5.11713
P02545	LMNA	INM:AR02	-0.0603974	14.0018	-0.431747	0.6713	0.933138	-5.11721
P35612	ADD2	INM:AR02	-0.129923	11.0736	-0.430854	0.671937	0.933138	-5.11749
Q53S08	RAB6D	INM:AR02	-0.102533	13.3915	-0.430736	0.672021	0.933138	-5.11752
P06733	ENO1	INM:AR02	0.0700464	15.5978	0.430251	0.672366	0.933138	-5.11768
O95497	VNN1	INM:AR02	0.10856	13.9216	0.429927	0.672598	0.933138	-5.11778
O94915	FRYL	INM:AR02	0.0658062	13.7644	0.429056	0.673219	0.933405	-5.11805
O95873	C6orf47	INM:AR02	-0.107453	10.9959	-0.427036	0.674662	0.93458	-5.11867
P06737	PYGL	INM:AR02	-0.0893484	17.6568	-0.426515	0.675034	0.93458	-5.11883
P61006	RAB8A	INM:AR02	0.0703377	12.6902	0.425533	0.675736	0.93458	-5.11914
Q9UKZ1	CNOT11	INM:AR02	-0.0948803	12.9277	-0.424816	0.676248	0.93458	-5.11936
O75436	VPS26A	INM:AR02	-0.0885806	13.474	-0.42473	0.67631	0.93458	-5.11938
O00462	MANBA	INM:AR02	-0.0495489	13.5748	-0.424259	0.676646	0.93458	-5.11953
O95202	LETM1	INM:AR02	-0.10544	12.5574	-0.42153	0.6786	0.936155	-5.12036
P29350	PTPN6	INM:AR02	-0.0524603	15.613	-0.420884	0.679062	0.936155	-5.12056
P16150	SPN	INM:AR02	-0.057661	16.0599	-0.420264	0.679507	0.936155	-5.12075
P30566	ADSL	INM:AR02	-0.0947462	12.126	-0.419963	0.679722	0.936155	-5.12084
P09326	CD48	INM:AR02	0.11076	12.7308	0.41837	0.680864	0.936155	-5.12132
P53990	IST1	INM:AR02	0.0573029	14.0018	0.417516	0.681477	0.936155	-5.12158
Q92835	INPP5D	INM:AR02	-0.0503609	15.3949	-0.417381	0.681574	0.936155	-5.12162
Q96GE4	CEP95	INM:AR02	0.128505	19.4758	0.417341	0.681602	0.936155	-5.12163
P84095	RHOG	INM:AR02	-0.0760743	17.4066	-0.417258	0.681662	0.936155	-5.12166
Q8WXH0	SYNE2	INM:AR02	0.0476257	14.0176	0.415656	0.682812	0.937142	-5.12214
Q9BY66	KDM5D	INM:AR02	-0.185435	13.2463	-0.41456	0.683599	0.93763	-5.12247
Q96BS2	TESC	INM:AR02	-0.117103	12.2162	-0.413065	0.684673	0.93772	-5.12292
Q96MM3	ZFP42	INM:AR02	-0.149484	13.6861	-0.412776	0.684881	0.93772	-5.123
P00387	CYB5R3	INM:AR02	-0.0661927	14.9704	-0.412351	0.685187	0.93772	-5.12313
Q9H2M9	RAB3GAP2	INM:AR02	-0.0517312	14.4182	-0.411572	0.685747	0.93772	-5.12336
P57772	EEFSEC	INM:AR02	-0.0662897	12.6053	-0.411301	0.685941	0.93772	-5.12344
P08236	GUSB	INM:AR02	0.0594342	13.7562	0.410869	0.686253	0.93772	-5.12357
O43707	ACTN4	INM:AR02	0.0739223	15.7002	0.409358	0.68734	0.938172	-5.12402
O75923	DYSF	INM:AR02	-0.0557978	16.1115	-0.408461	0.687986	0.938172	-5.12429
Q4KMP7	TBC1D10B	INM:AR02	-0.0821892	13.0512	-0.408001	0.688317	0.938172	-5.12442
Q9NR12	PDLIM7	INM:AR02	-0.0624421	12.6018	-0.407728	0.688514	0.938172	-5.1245
Q96IC2	REXO5	INM:AR02	-0.0842621	12.2561	-0.407413	0.688741	0.938172	-5.12459
P05164	MPO	INM:AR02	0.0578428	21.5299	0.406568	0.68935	0.938414	-5.12484
Q99747	NAPG	INM:AR02	0.0598956	13.1147	0.405635	0.690023	0.938742	-5.12512
O60749	SNX2	INM:AR02	-0.0667247	12.4295	-0.404735	0.690672	0.939037	-5.12538
Q9BPW8	NIPSNAP1	INM:AR02	0.0979586	12.924	0.40361	0.691483	0.939553	-5.12571
P61923	COPZ1	INM:AR02	0.0969123	12.462	0.400876	0.693457	0.940454	-5.12651
Q96CN9	GCC1	INM:AR02	-0.0698591	13.5187	-0.399924	0.694145	0.940454	-5.12678
P63279	UBE2I	INM:AR02	0.0949471	13.9236	0.399769	0.694257	0.940454	-5.12683
O60762	DPM1	INM:AR02	0.0678658	12.9137	0.399754	0.694269	0.940454	-5.12683
Q16836	HADH	INM:AR02	-0.10183	12.2224	-0.399697	0.69431	0.940454	-5.12685
Q10567	AP1B1	INM:AR02	-0.0529082	13.4078	-0.396999	0.696261	0.942202	-5.12763
Q9ULD4	BRPF3	INM:AR02	-0.0952916	11.0626	-0.396236	0.696813	0.942202	-5.12785
Q8WU79	SMAP2	INM:AR02	-0.05547	13.9986	-0.395878	0.697072	0.942202	-5.12795
Q96EU7	C1GALT1C1	INM:AR02	0.0904045	12.0158	0.394955	0.697741	0.942202	-5.12821
P61088	UBE2N	INM:AR02	-0.0644498	13.4952	-0.392228	0.699718	0.942202	-5.12899
P55786	NPEPPS	INM:AR02	0.0541917	13.4933	0.389474	0.701716	0.942202	-5.12977
Q9Y3F4	STRAP	INM:AR02	0.0843791	11.1691	0.388665	0.702303	0.942202	-5.13
Q96SB4	SRPK1	INM:AR02	-0.0580399	13.5565	-0.388628	0.70233	0.942202	-5.13001
Q969Q5	RAB24	INM:AR02	0.105981	12.5153	0.388529	0.702402	0.942202	-5.13004
O94967	WDR47	INM:AR02	-0.0721668	11.9329	-0.388461	0.702451	0.942202	-5.13006
Q16543	CDC37	INM:AR02	-0.0533659	13.9828	-0.388419	0.702481	0.942202	-5.13007
Q96HC4	PDLIM5	INM:AR02	0.12032	10.2289	0.388398	0.702497	0.942202	-5.13007
Q01130	SRSF2	INM:AR02	0.16163	13.9272	0.387179	0.703382	0.942202	-5.13042
Q8WWI1	LMO7	INM:AR02	-0.102654	13.1391	-0.387001	0.703512	0.942202	-5.13047
Q15942	ZYX	INM:AR02	-0.0517724	17.7386	-0.38655	0.70384	0.942202	-5.13059
Q96AX1	VPS33A	INM:AR02	-0.0570608	13.6229	-0.384731	0.705162	0.942202	-5.1311
P49006	MARCKSL1	INM:AR02	-0.0613099	11.5758	-0.382756	0.706599	0.942202	-5.13165
P39023	RPL3	INM:AR02	-0.0687654	16.8194	-0.382126	0.707058	0.942202	-5.13183
O00151	PDLIM1	INM:AR02	-0.0904308	12.0995	-0.381738	0.707341	0.942202	-5.13193
O00161	SNAP23	INM:AR02	-0.0718965	12.7611	-0.381163	0.707759	0.942202	-5.13209
P37235	HPCAL1	INM:AR02	-0.0595285	12.2973	-0.380769	0.708046	0.942202	-5.1322
P09543	CNP	INM:AR02	-0.0711645	15.2504	-0.380736	0.70807	0.942202	-5.13221
P48637	GSS	INM:AR02	-0.0526809	12.5759	-0.380679	0.708112	0.942202	-5.13223
P16333	NCK1	INM:AR02	0.0719088	12.8014	0.380523	0.708225	0.942202	-5.13227
Q99873	PRMT1	INM:AR02	-0.0807283	11.9079	-0.380215	0.70845	0.942202	-5.13235
Q03001	DST	INM:AR02	0.096549	15.1043	0.378664	0.70958	0.942202	-5.13278
P07384	CAPN1	INM:AR02	0.0549624	14.0775	0.378658	0.709585	0.942202	-5.13278
Q9BV38	WDR18	INM:AR02	-0.0703307	12.8509	-0.378315	0.709835	0.942202	-5.13288
Q8IWA5	SLC44A2	INM:AR02	-0.0716095	12.582	-0.376906	0.710863	0.942202	-5.13326
Q15746	MYLK	INM:AR02	0.121574	14.2495	0.376242	0.711347	0.942202	-5.13344
Q9Y265	RUVBL1	INM:AR02	0.0423042	16.1482	0.376228	0.711358	0.942202	-5.13345
Q8N5H7	SH2D3C	INM:AR02	0.0958548	11.3753	0.376072	0.711471	0.942202	-5.13349
P18206	VCL	INM:AR02	-0.0506378	17.073	-0.375347	0.712001	0.942202	-5.13369
P06702	S100A9	INM:AR02	-0.0694966	16.2819	-0.373453	0.713383	0.942202	-5.1342
O14949	UQCRQ	INM:AR02	0.0673599	13.0381	0.373306	0.713491	0.942202	-5.13424
Q9H2U2	PPA2	INM:AR02	-0.102773	13.5583	-0.373193	0.713573	0.942202	-5.13427
Q9HAB8	PPCS	INM:AR02	0.106587	12.2471	0.372958	0.713746	0.942202	-5.13434
Q96H20	SNF8	INM:AR02	-0.0774101	11.4914	-0.371543	0.71478	0.942202	-5.13472
Q96QH2	PRAM1	INM:AR02	0.065038	14.8991	0.370231	0.715739	0.942202	-5.13507
Q9BT09	CNPY3	INM:AR02	-0.0791164	13.36	-0.370101	0.715834	0.942202	-5.13511
Q05823	RNASEL	INM:AR02	-0.0791813	10.9091	-0.369934	0.715957	0.942202	-5.13515
Q6P4A8	PLBD1	INM:AR02	-0.053958	17.0276	-0.369533	0.71625	0.942202	-5.13526
P05388	RPLP0	INM:AR02	-0.0685843	14.4218	-0.36874	0.71683	0.942202	-5.13547
Q9BYE2	TMPRSS13	INM:AR02	-0.137251	14.6709	-0.368582	0.716946	0.942202	-5.13551
Q12972	PPP1R8	INM:AR02	0.0857444	12.125	0.368513	0.716996	0.942202	-5.13553
Q460N5	PARP14	INM:AR02	-0.0766277	12.0596	-0.368512	0.716997	0.942202	-5.13553
P0DOY2		INM:AR02	0.0545798	12.9518	0.368468	0.71703	0.942202	-5.13554
Q9Y6C9	MTCH2	INM:AR02	-0.102569	13.1086	-0.368165	0.717251	0.942202	-5.13562
P09668	CTSH	INM:AR02	0.0576906	13.652	0.368071	0.71732	0.942202	-5.13565
Q5VYY1	ANKRD22	INM:AR02	-0.0577759	14.2871	-0.367572	0.717686	0.942202	-5.13578
P14854	COX6B1	INM:AR02	0.0506764	16.0255	0.367548	0.717703	0.942202	-5.13579
Q5TID7	CCDC181	INM:AR02	0.0720673	14.952	0.364489	0.719945	0.943506	-5.1366
Q9Y6X5	ENPP4	INM:AR02	-0.0600066	13.3841	-0.364235	0.720131	0.943506	-5.13667
Q96GM8	TOE1	INM:AR02	0.0816806	10.716	0.364234	0.720131	0.943506	-5.13667
Q969H8	MYDGF	INM:AR02	0.080926	11.4974	0.363824	0.720432	0.943506	-5.13678
P0DN76	U2AF1	INM:AR02	-0.0857936	11.7916	-0.362539	0.721375	0.943809	-5.13712
Q9Y5Z4	HEBP2	INM:AR02	0.0553521	14.0306	0.362157	0.721655	0.943809	-5.13722
O60832	DKC1	INM:AR02	0.0916484	12.4536	0.361213	0.722348	0.943809	-5.13746
P53621	COPA	INM:AR02	-0.0692001	14.3247	-0.360967	0.722528	0.943809	-5.13753
Q8WXI9	GATAD2B	INM:AR02	0.0750462	15.2666	0.360551	0.722834	0.943809	-5.13764
A0A075B759	PPIAL4F	INM:AR02	0.136286	15.2292	0.358519	0.724327	0.944159	-5.13817
Q70J99	UNC13D	INM:AR02	0.0750437	14.7169	0.358046	0.724675	0.944159	-5.13829
Q9UKE5	TNIK	INM:AR02	0.101683	14.1219	0.357752	0.72489	0.944159	-5.13837
P36897	TGFBR1	INM:AR02	-0.0882841	12.2944	-0.357743	0.724897	0.944159	-5.13837
P37198	NUP62	INM:AR02	-0.0722536	11.9418	-0.356772	0.725611	0.944159	-5.13862
Q641Q2	WASHC2A	INM:AR02	0.0607165	14.1019	0.355901	0.726251	0.944159	-5.13885
Q8NEZ2	VPS37A	INM:AR02	0.0591503	12.4645	0.355742	0.726368	0.944159	-5.13889
Q9HD15	SRA1	INM:AR02	-0.149064	9.90228	-0.355342	0.726663	0.944159	-5.13899
Q7Z4F1	LRP10	INM:AR02	0.0583486	12.6852	0.354702	0.727134	0.944159	-5.13916
P49750	YLPM1	INM:AR02	-0.0548282	12.5394	-0.353148	0.728277	0.944159	-5.13956
P06744	GPI	INM:AR02	-0.0879841	16.4247	-0.353131	0.72829	0.944159	-5.13956
Q14974	KPNB1	INM:AR02	0.0732235	14.0334	0.352629	0.72866	0.944159	-5.13969
P10599	TXN	INM:AR02	-0.0799355	14.8154	-0.351681	0.729358	0.944159	-5.13993
Q9NV96	TMEM30A	INM:AR02	0.0522286	15.9505	0.351482	0.729505	0.944159	-5.13998
O15231	ZNF185	INM:AR02	-0.0793052	11.6134	-0.350538	0.7302	0.944159	-5.14022
P34059	GALNS	INM:AR02	0.0413332	13.7257	0.35048	0.730243	0.944159	-5.14024
Q15102	PAFAH1B3	INM:AR02	-0.103769	10.188	-0.350151	0.730485	0.944159	-5.14032
P26640	VARS1	INM:AR02	0.0552064	12.6707	0.348245	0.731891	0.945414	-5.1408
Q8N4Q0	PTGR3	INM:AR02	-0.0732229	12.3186	-0.346437	0.733225	0.946574	-5.14126
Q9NR50	EIF2B3	INM:AR02	-0.0885165	11.0978	-0.345368	0.734014	0.946934	-5.14153
P19971	TYMP	INM:AR02	0.0444013	13.899	0.34488	0.734374	0.946934	-5.14165
O95747	OXSR1	INM:AR02	0.0460322	14.1498	0.341316	0.737009	0.948153	-5.14254
Q9Y2Z0	SUGT1	INM:AR02	-0.0460835	13.5528	-0.340549	0.737576	0.948153	-5.14273
Q9Y6D6	ARFGEF1	INM:AR02	0.0649085	12.3681	0.339639	0.738249	0.948153	-5.14295
P08559	PDHA1	INM:AR02	-0.0721585	13.0802	-0.33911	0.738641	0.948153	-5.14309
Q9UIJ7	AK3	INM:AR02	0.0937434	13.421	0.338545	0.739059	0.948153	-5.14322
Q13151	HNRNPA0	INM:AR02	-0.137363	12.0687	-0.338475	0.739111	0.948153	-5.14324
Q9H4M9	EHD1	INM:AR02	0.0555246	17.1581	0.337422	0.73989	0.948153	-5.1435
P62995	TRA2B	INM:AR02	0.0475755	16.7777	0.337271	0.740002	0.948153	-5.14354
O00507	USP9Y	INM:AR02	-0.0509115	14.3014	-0.336805	0.740347	0.948153	-5.14365
P31749	AKT1	INM:AR02	0.098875	11.9629	0.336406	0.740643	0.948153	-5.14375
Q9UQ88	CDK11A	INM:AR02	-0.0676187	13.0306	-0.335624	0.741222	0.948153	-5.14394
P51692	STAT5B	INM:AR02	-0.0554742	13.3	-0.335257	0.741494	0.948153	-5.14403
O15400	STX7	INM:AR02	0.0474026	15.9776	0.334868	0.741782	0.948153	-5.14412
P42768	WAS	INM:AR02	-0.0574841	14.9934	-0.334754	0.741867	0.948153	-5.14415
P03928	ATP8	INM:AR02	-0.0553086	12.9214	-0.334211	0.742269	0.948153	-5.14428
Q96SB3	PPP1R9B	INM:AR02	0.0624193	12.4037	0.334172	0.742298	0.948153	-5.14429
O95613	PCNT	INM:AR02	0.0446598	13.064	0.333404	0.742867	0.948323	-5.14448
Q9UGV2	NDRG3	INM:AR02	0.129888	12.5248	0.332442	0.743581	0.948677	-5.14471
Q9NVM9	INTS13	INM:AR02	-0.0429872	12.4811	-0.331051	0.744613	0.948797	-5.14505
Q96TC7	RMDN3	INM:AR02	0.0602135	13.485	0.330023	0.745376	0.948797	-5.14529
Q9Y230	RUVBL2	INM:AR02	-0.0706545	13.1802	-0.330012	0.745384	0.948797	-5.1453
Q7Z406	MYH14	INM:AR02	-0.083934	16.1879	-0.32933	0.745891	0.948797	-5.14546
Q8NE71	ABCF1	INM:AR02	-0.0609179	17.6715	-0.328817	0.746272	0.948797	-5.14558
P55072	VCP	INM:AR02	0.0446677	15.829	0.32818	0.746745	0.948797	-5.14574
Q96S97	MYADM	INM:AR02	0.0406241	16.1961	0.328023	0.746862	0.948797	-5.14577
Q15393	SF3B3	INM:AR02	-0.0313731	15.009	-0.327531	0.747227	0.948797	-5.14589
Q9Y6A5	TACC3	INM:AR02	0.05249	11.845	0.327025	0.747603	0.948797	-5.14601
Q9UJX5	ANAPC4	INM:AR02	-0.0730681	13.6541	-0.32607	0.748313	0.949144	-5.14624
Q13232	NME3	INM:AR02	0.0913212	10.8557	0.324372	0.749576	0.950191	-5.14664
P49916	LIG3	INM:AR02	-0.0709046	12.4657	-0.322403	0.751042	0.951385	-5.1471
Q9HBF4	ZFYVE1	INM:AR02	0.0693759	11.8007	0.319799	0.75298	0.951385	-5.14771
O96000	NDUFB10	INM:AR02	-0.0792579	10.8584	-0.319751	0.753016	0.951385	-5.14772
Q9Y5L0	TNPO3	INM:AR02	0.0727075	13.3849	0.319497	0.753205	0.951385	-5.14778
P98160	HSPG2	INM:AR02	0.0891091	13.009	0.319069	0.753524	0.951385	-5.14788
Q99570	PIK3R4	INM:AR02	-0.0575256	12.033	-0.318987	0.753586	0.951385	-5.1479
P78318	IGBP1	INM:AR02	-0.0431417	13.902	-0.318796	0.753728	0.951385	-5.14794
Q9BUR5	APOO	INM:AR02	0.0811346	10.5503	0.318406	0.754018	0.951385	-5.14803
P62913	RPL11	INM:AR02	0.0886576	13.5308	0.317266	0.754868	0.951905	-5.1483
Q659C4	LARP1B	INM:AR02	-0.102504	12.2152	-0.31584	0.755932	0.952694	-5.14863
O15530	PDPK1	INM:AR02	0.0624293	13.3212	0.313552	0.75764	0.954185	-5.14915
Q15149	PLEC	INM:AR02	0.0334825	15.2728	0.311755	0.758982	0.954185	-5.14956
O14602	EIF1AY	INM:AR02	0.0343883	14.6748	0.311042	0.759514	0.954185	-5.14972
Q9H330	TMEM245	INM:AR02	0.0672684	12.5581	0.309927	0.760348	0.954185	-5.14997
Q9Y2R9	MRPS7	INM:AR02	0.105179	11.4648	0.309774	0.760462	0.954185	-5.15001
O00442	RTCA	INM:AR02	-0.0818488	11.0307	-0.306983	0.762549	0.954185	-5.15063
Q9Y5X1	SNX9	INM:AR02	0.0527617	12.6872	0.306572	0.762857	0.954185	-5.15072
Q96KP4	CNDP2	INM:AR02	0.0715845	14.0088	0.306552	0.762872	0.954185	-5.15073
Q9UNM6	PSMD13	INM:AR02	-0.0480996	14.4254	-0.305937	0.763332	0.954185	-5.15087
P62333	PSMC6	INM:AR02	0.0478385	12.7447	0.305671	0.763532	0.954185	-5.15093
P35659	DEK	INM:AR02	0.0592635	14.9864	0.305452	0.763695	0.954185	-5.15097
P53992	SEC24C	INM:AR02	0.0479588	15.6431	0.305331	0.763785	0.954185	-5.151
Q9Y5K6	CD2AP	INM:AR02	-0.0774016	11.2002	-0.305313	0.7638	0.954185	-5.15101
Q5HYI8	RABL3	INM:AR02	-0.0426819	14.5416	-0.303735	0.764981	0.954185	-5.15135
Q8N5C6	SRBD1	INM:AR02	-0.0615052	12.6126	-0.303725	0.764988	0.954185	-5.15136
P48634	PRRC2A	INM:AR02	-0.0527685	12.4898	-0.303365	0.765258	0.954185	-5.15144
Q15437	SEC23B	INM:AR02	-0.0395119	11.8689	-0.303082	0.76547	0.954185	-5.1515
Q5T8P6	RBM26	INM:AR02	-0.123155	12.8563	-0.302535	0.76588	0.954185	-5.15162
Q9UGP4	LIMD1	INM:AR02	0.0739077	10.7986	0.301664	0.766532	0.954185	-5.15181
Q8N1F8	STK11IP	INM:AR02	-0.0469737	11.8801	-0.300418	0.767467	0.954185	-5.15208
Q86YV0	RASAL3	INM:AR02	0.0658432	13.055	0.300326	0.767535	0.954185	-5.1521
Q9NUU6	OTULINL	INM:AR02	0.0500731	13.1492	0.300134	0.76768	0.954185	-5.15215
Q6PI48	DARS2	INM:AR02	-0.0555413	11.6441	-0.300073	0.767725	0.954185	-5.15216
P63092	GNAS	INM:AR02	-0.0774319	14.8777	-0.299007	0.768525	0.954185	-5.15239
Q9UH99	SUN2	INM:AR02	0.0421547	12.9482	0.298755	0.768714	0.954185	-5.15245
P52888	THOP1	INM:AR02	0.0577919	12.8972	0.298506	0.7689	0.954185	-5.1525
A0AVT1	UBA6	INM:AR02	-0.070023	11.616	-0.298162	0.769158	0.954185	-5.15258
O75694	NUP155	INM:AR02	0.0582819	15.1284	0.297306	0.769801	0.954185	-5.15276
P78527	PRKDC	INM:AR02	0.0309283	15.7127	0.29668	0.770271	0.954185	-5.1529
P52732	KIF11	INM:AR02	-0.088925	13.1738	-0.296664	0.770283	0.954185	-5.1529
O95716	RAB3D	INM:AR02	0.0831874	11.2267	0.292889	0.773119	0.956986	-5.15371
P13378	HOXD8	INM:AR02	0.0979599	11.4015	0.291998	0.773788	0.956986	-5.1539
P20810	CAST	INM:AR02	-0.0426221	13.9877	-0.291896	0.773865	0.956986	-5.15392
P21266	GSTM3	INM:AR02	0.107986	10.3982	0.290812	0.77468	0.957204	-5.15415
Q01082	SPTBN1	INM:AR02	0.0359223	15.4737	0.290491	0.774921	0.957204	-5.15422
Q32MZ4	LRRFIP1	INM:AR02	-0.0424349	12.8254	-0.289738	0.775487	0.957359	-5.15438
P35579	MYH9	INM:AR02	0.0534166	18.1203	0.287792	0.776952	0.958623	-5.15479
Q9H0E2	TOLLIP	INM:AR02	0.0649935	13.5043	0.285264	0.778855	0.960426	-5.15532
Q14997	PSME4	INM:AR02	-0.108674	11.2425	-0.283984	0.77982	0.96107	-5.15558
Q9Y285	FARSA	INM:AR02	0.0843373	12.0662	0.282027	0.781295	0.961896	-5.15599
P26641	EEF1G	INM:AR02	-0.0418783	14.0133	-0.281921	0.781375	0.961896	-5.15601
Q12913	PTPRJ	INM:AR02	0.0372541	13.937	0.280435	0.782496	0.962481	-5.15631
Q8WXI4	ACOT11	INM:AR02	0.100555	11.5983	0.280117	0.782735	0.962481	-5.15638
Q5TFQ8	SIRPB1	INM:AR02	0.0832717	13.4833	0.27854	0.783925	0.962722	-5.1567
Q96F46	IL17RA	INM:AR02	-0.0437627	12.7962	-0.277586	0.784646	0.962722	-5.15689
P49959	MRE11	INM:AR02	-0.043579	11.5474	-0.275354	0.786332	0.962722	-5.15734
P08195	SLC3A2	INM:AR02	0.0439215	12.5968	0.275207	0.786442	0.962722	-5.15737
Q05519	SRSF11	INM:AR02	-0.0518769	12.2593	-0.274338	0.7871	0.962722	-5.15754
Q15526	SURF1	INM:AR02	-0.0618782	13.0977	-0.273791	0.787513	0.962722	-5.15765
Q9Y4K1	CRYBG1	INM:AR02	0.0419696	12.354	0.273294	0.787889	0.962722	-5.15775
Q9P2P1	NYNRIN	INM:AR02	-0.0591217	12.0351	-0.272482	0.788503	0.962722	-5.15791
Q96A00	PPP1R14A	INM:AR02	-0.0812785	10.8662	-0.272079	0.788807	0.962722	-5.15799
Q7Z6I6	ARHGAP30	INM:AR02	0.0564295	13.0683	0.271977	0.788884	0.962722	-5.15801
Q9Y624	F11R	INM:AR02	0.0747665	10.4751	0.270788	0.789784	0.962722	-5.15825
Q99623	PHB2	INM:AR02	0.0716644	12.0833	0.270523	0.789984	0.962722	-5.1583
Q658P3	STEAP3	INM:AR02	0.0518178	13.1123	0.269704	0.790603	0.962722	-5.15846
Q9ULD5	ZNF777	INM:AR02	0.0385257	14.1581	0.269578	0.790699	0.962722	-5.15849
Q14194	CRMP1	INM:AR02	-0.0383035	14.6312	-0.269492	0.790764	0.962722	-5.1585
P42677	RPS27	INM:AR02	0.0767218	12.2322	0.269377	0.790851	0.962722	-5.15853
Q8NF50	DOCK8	INM:AR02	-0.0284129	14.7208	-0.267338	0.792394	0.962722	-5.15893
O95674	CDS2	INM:AR02	0.0654859	12.2302	0.26666	0.792908	0.962722	-5.15906
P06396	GSN	INM:AR02	0.0576227	19.3311	0.266045	0.793374	0.962722	-5.15918
P15144	ANPEP	INM:AR02	0.0400533	14.8184	0.265731	0.793612	0.962722	-5.15924
Q8WVJ2	NUDCD2	INM:AR02	-0.0687436	11.4601	-0.26463	0.794446	0.962722	-5.15945
Q15046	KARS1	INM:AR02	-0.0282373	14.4865	-0.264357	0.794653	0.962722	-5.1595
P53999	SUB1	INM:AR02	0.0427628	13.3188	0.261625	0.796724	0.962722	-5.16003
P23368	ME2	INM:AR02	-0.0293268	14.8831	-0.261571	0.796765	0.962722	-5.16004
Q8N3F8	MICALL1	INM:AR02	0.04161	12.3512	0.261438	0.796866	0.962722	-5.16006
Q9P2R3	ANKFY1	INM:AR02	0.0469402	12.5709	0.261103	0.79712	0.962722	-5.16013
O14548	COX7A2L	INM:AR02	-0.0559159	12.8612	-0.260828	0.797329	0.962722	-5.16018
P13639	EEF2	INM:AR02	-0.0356995	14.9314	-0.259004	0.798712	0.962722	-5.16052
Q6VY07	PACS1	INM:AR02	0.0579791	12.0136	0.258933	0.798767	0.962722	-5.16054
P41218	MNDA	INM:AR02	-0.140081	14.5267	-0.258922	0.798775	0.962722	-5.16054
Q9BV68	RNF126	INM:AR02	-0.0434875	13.9348	-0.258413	0.799161	0.962722	-5.16064
Q14789	GOLGB1	INM:AR02	0.114992	12.2373	0.258312	0.799238	0.962722	-5.16066
Q92973	TNPO1	INM:AR02	0.0269318	15.0449	0.257833	0.799602	0.962722	-5.16075
Q15418	RPS6KA1	INM:AR02	0.0364262	14.0564	0.255973	0.801014	0.962722	-5.16109
P24539	ATP5PB	INM:AR02	0.0331194	13.5971	0.255179	0.801617	0.962722	-5.16124
O95336	PGLS	INM:AR02	0.0790159	13.0802	0.254877	0.801847	0.962722	-5.1613
O96005	CLPTM1	INM:AR02	-0.0568864	11.7961	-0.254672	0.802003	0.962722	-5.16134
A8MWD9		INM:AR02	-0.0496617	14.251	-0.254343	0.802253	0.962722	-5.1614
P16615	ATP2A2	INM:AR02	-0.040957	15.0737	-0.254257	0.802318	0.962722	-5.16141
P06239	LCK	INM:AR02	0.0480208	12.2356	0.253949	0.802552	0.962722	-5.16147
P12429	ANXA3	INM:AR02	0.0677724	13.8261	0.253784	0.802678	0.962722	-5.1615
O15372	EIF3H	INM:AR02	0.0639175	12.9932	0.253543	0.802861	0.962722	-5.16155
Q9NZD8	SPG21	INM:AR02	-0.0448293	13.2753	-0.253039	0.803244	0.962722	-5.16164
P28331	NDUFS1	INM:AR02	0.0515662	13.3019	0.252924	0.803331	0.962722	-5.16166
Q14160	SCRIB	INM:AR02	-0.0585201	12.3297	-0.252656	0.803535	0.962722	-5.16171
Q9Y4W2	LAS1L	INM:AR02	-0.0519683	12.7222	-0.252528	0.803633	0.962722	-5.16173
P27708	CAD	INM:AR02	0.0306914	14.4668	0.251746	0.804227	0.962722	-5.16188
P30740	SERPINB1	INM:AR02	0.035265	14.6038	0.251005	0.80479	0.962722	-5.16201
Q9P2M7	CGN	INM:AR02	-0.0595525	11.558	-0.250878	0.804887	0.962722	-5.16204
Q96EP5	DAZAP1	INM:AR02	0.0366424	14.1172	0.248819	0.806453	0.962722	-5.16241
Q14344	GNA13	INM:AR02	0.0478496	13.8763	0.248466	0.806722	0.962722	-5.16248
P12814	ACTN1	INM:AR02	0.0358131	18.1877	0.247001	0.807838	0.962722	-5.16274
Q93008	USP9X	INM:AR02	-0.0377046	13.2623	-0.246931	0.807891	0.962722	-5.16275
P15586	GNS	INM:AR02	-0.0313968	14.8913	-0.246086	0.808535	0.962722	-5.1629
P14866	HNRNPL	INM:AR02	-0.0316703	14.2916	-0.24567	0.808851	0.962722	-5.16298
P62249	RPS16	INM:AR02	0.0379375	14.2129	0.245391	0.809064	0.962722	-5.16303
O75643	SNRNP200	INM:AR02	0.0380009	14.1629	0.245374	0.809077	0.962722	-5.16303
O00203	AP3B1	INM:AR02	-0.0425069	12.5476	-0.244964	0.809389	0.962722	-5.16311
Q9BTD8	RBM42	INM:AR02	0.0700236	12.3258	0.244647	0.809631	0.962722	-5.16316
Q9Y2X3	NOP58	INM:AR02	0.0289148	15.3835	0.243907	0.810194	0.962722	-5.16329
Q10472	GALNT1	INM:AR02	-0.045772	13.7563	-0.243821	0.81026	0.962722	-5.16331
A0A1B0GUS4		INM:AR02	-0.054348	13.5899	-0.243094	0.810814	0.962722	-5.16344
P08670	VIM	INM:AR02	0.0450023	18.5627	0.242979	0.810901	0.962722	-5.16346
P27701	CD82	INM:AR02	0.0565896	11.8379	0.242028	0.811626	0.962722	-5.16363
Q9H939	PSTPIP2	INM:AR02	0.0757007	10.9132	0.241912	0.811715	0.962722	-5.16365
O14672	ADAM10	INM:AR02	-0.025691	15.9268	-0.240745	0.812605	0.963252	-5.16385
Q01085	TIAL1	INM:AR02	0.0985937	10.5962	0.237334	0.815207	0.965244	-5.16445
P51665	PSMD7	INM:AR02	-0.0391301	13.1467	-0.23724	0.815279	0.965244	-5.16446
O43747	AP1G1	INM:AR02	-0.0424395	14.0771	-0.236797	0.815618	0.965244	-5.16454
Q96QR8	PURB	INM:AR02	-0.0401314	12.0768	-0.235829	0.816357	0.965363	-5.16471
Q92542	NCSTN	INM:AR02	-0.0429011	12.4013	-0.234583	0.817308	0.965363	-5.16492
Q15075	EEA1	INM:AR02	-0.0486615	13.0616	-0.234427	0.817427	0.965363	-5.16495
Q9UJF2	RASAL2	INM:AR02	0.0736142	14.4738	0.234339	0.817494	0.965363	-5.16496
Q92688	ANP32B	INM:AR02	0.0623919	14.6639	0.23335	0.81825	0.96573	-5.16513
Q13094	LCP2	INM:AR02	-0.0347071	12.3833	-0.230575	0.820371	0.967708	-5.1656
Q8NI27	THOC2	INM:AR02	-0.0441251	12.2169	-0.224863	0.824741	0.972069	-5.16655
O95644	NFATC1	INM:AR02	0.0458846	12.2418	0.224574	0.824962	0.972069	-5.1666
Q9BSA9	TMEM175	INM:AR02	0.0488498	11.8311	0.223592	0.825714	0.972322	-5.16676
P40937	RFC5	INM:AR02	0.0539955	11.4897	0.223126	0.826071	0.972322	-5.16684
P11717	IGF2R	INM:AR02	0.0257913	15.3377	0.221059	0.827655	0.973659	-5.16717
Q9BRZ2	TRIM56	INM:AR02	0.0568145	13.6695	0.217388	0.830469	0.975299	-5.16776
Q9BUP3	HTATIP2	INM:AR02	0.0530014	13.6765	0.217269	0.830561	0.975299	-5.16778
Q8WUX9	CHMP7	INM:AR02	-0.044523	13.1352	-0.216866	0.83087	0.975299	-5.16784
P62834	RAP1A	INM:AR02	0.0424174	14.4855	0.216763	0.830949	0.975299	-5.16786
Q00653	NFKB2	INM:AR02	-0.0415765	12.1385	-0.216041	0.831502	0.975299	-5.16797
Q6RI45	BRWD3	INM:AR02	0.126521	17.1313	0.215556	0.831875	0.975299	-5.16805
Q8TCD5	NT5C	INM:AR02	-0.0486044	11.2407	-0.215146	0.832189	0.975299	-5.16811
Q14738	PPP2R5D	INM:AR02	-0.0532398	11.0882	-0.213691	0.833306	0.975583	-5.16834
O95793	STAU1	INM:AR02	0.0541097	12.1707	0.213661	0.833329	0.975583	-5.16835
Q9Y5B9	SUPT16H	INM:AR02	-0.0376683	13.9414	-0.212693	0.834072	0.975927	-5.1685
Q8IUI8	CRLF3	INM:AR02	0.0775153	13.4786	0.211806	0.834753	0.976198	-5.16863
P49189	ALDH9A1	INM:AR02	0.0608221	11.4677	0.210638	0.83565	0.976723	-5.16882
O43567	RNF13	INM:AR02	-0.0357171	12.9699	-0.208718	0.837125	0.977465	-5.16911
P42345	MTOR	INM:AR02	0.0372611	12.9935	0.20864	0.837185	0.977465	-5.16912
P02810	PRH1	INM:AR02	0.0898263	10.7271	0.206484	0.838842	0.978231	-5.16945
P40429	RPL13A	INM:AR02	0.0641381	14.8255	0.205884	0.839304	0.978231	-5.16954
Q7LBC6	KDM3B	INM:AR02	-0.0487234	12.6044	-0.204533	0.840343	0.978231	-5.16974
Q13510	ASAH1	INM:AR02	-0.0290286	14.8384	-0.203183	0.841381	0.978231	-5.16994
Q00535	CDK5	INM:AR02	0.0418607	13.9411	0.203059	0.841477	0.978231	-5.16996
Q9Y3E1	HDGFL3	INM:AR02	-0.0403477	11.7046	-0.202441	0.841952	0.978231	-5.17005
P54819	AK2	INM:AR02	-0.0399905	15.356	-0.20202	0.842276	0.978231	-5.17011
Q6IQ22	RAB12	INM:AR02	-0.0516046	18.5674	-0.201825	0.842426	0.978231	-5.17014
O00178	GTPBP1	INM:AR02	0.047703	15.1475	0.201764	0.842473	0.978231	-5.17015
O75592	MYCBP2	INM:AR02	0.0301669	12.4508	0.201713	0.842512	0.978231	-5.17016
Q14980	NUMA1	INM:AR02	0.0266249	16.7222	0.200897	0.843141	0.978231	-5.17028
Q8N5G0	SMIM20	INM:AR02	-0.0293469	13.5372	-0.200767	0.843241	0.978231	-5.1703
P08631	HCK	INM:AR02	-0.04035	14.3648	-0.198763	0.844783	0.979498	-5.17059
Q99497	PARK7	INM:AR02	0.0613294	11.3229	0.197745	0.845567	0.979884	-5.17074
O94819	KBTBD11	INM:AR02	-0.0314853	12.6052	-0.194519	0.848053	0.980175	-5.1712
P08708	RPS17	INM:AR02	0.0425477	12.5857	0.194247	0.848263	0.980175	-5.17124
P48736	PIK3CG	INM:AR02	0.0489393	12.7052	0.193387	0.848926	0.980175	-5.17136
P68400	CSNK2A1	INM:AR02	-0.0368729	12.0074	-0.192079	0.849935	0.980175	-5.17155
P47756	CAPZB	INM:AR02	0.0262366	16.8247	0.191445	0.850423	0.980175	-5.17163
Q99829	CPNE1	INM:AR02	0.0309327	14.6743	0.191276	0.850553	0.980175	-5.17166
Q9Y4G6	TLN2	INM:AR02	0.0315967	14.7543	0.191242	0.85058	0.980175	-5.17166
P41091	EIF2S3	INM:AR02	0.0321949	13.2304	0.190894	0.850848	0.980175	-5.17171
P49790	NUP153	INM:AR02	0.0261783	13.6206	0.190437	0.851201	0.980175	-5.17178
Q96J02	ITCH	INM:AR02	0.029086	12.3801	0.18975	0.851731	0.980175	-5.17187
Q9Y2K7	KDM2A	INM:AR02	-0.0423261	11.3925	-0.189271	0.8521	0.980175	-5.17194
Q9NTK5	OLA1	INM:AR02	-0.0275204	13.9828	-0.187149	0.853738	0.980175	-5.17223
Q08379	GOLGA2	INM:AR02	-0.0423669	10.939	-0.187037	0.853824	0.980175	-5.17224
Q15287	RNPS1	INM:AR02	-0.0364055	14.2161	-0.186789	0.854016	0.980175	-5.17228
Q96F15	GIMAP5	INM:AR02	-0.0421741	13.0065	-0.186673	0.854105	0.980175	-5.17229
P51610	HCFC1	INM:AR02	-0.0442341	11.5196	-0.186237	0.854442	0.980175	-5.17235
Q9BVS4	RIOK2	INM:AR02	0.0463209	12.0888	0.185229	0.855221	0.980175	-5.17249
O95758	PTBP3	INM:AR02	0.0234123	14.1747	0.185167	0.855268	0.980175	-5.1725
O75369	FLNB	INM:AR02	-0.0323105	12.0403	-0.184836	0.855524	0.980175	-5.17254
Q15052	ARHGEF6	INM:AR02	-0.0263561	14.0311	-0.184525	0.855764	0.980175	-5.17259
Q9NXH8	TOR4A	INM:AR02	0.0288123	12.9937	0.184245	0.85598	0.980175	-5.17262
P46977	STT3A	INM:AR02	-0.0215097	14.7138	-0.183315	0.856699	0.980175	-5.17275
P61978	HNRNPK	INM:AR02	-0.0329686	18.4033	-0.182382	0.85742	0.980175	-5.17287
Q71UM5	RPS27L	INM:AR02	0.0634639	11.8454	0.18103	0.858464	0.980175	-5.17305
O75448	MED24	INM:AR02	0.0558118	10.4712	0.180466	0.8589	0.980175	-5.17313
P52435	POLR2J	INM:AR02	-0.0319476	11.7139	-0.179856	0.859372	0.980175	-5.17321
P20073	ANXA7	INM:AR02	-0.0266983	13.4813	-0.178079	0.860746	0.980175	-5.17344
O75323	NIPSNAP2	INM:AR02	-0.0245839	14.1448	-0.176918	0.861644	0.980175	-5.17359
Q96JJ3	ELMO2	INM:AR02	0.031864	14.8472	0.176459	0.861999	0.980175	-5.17365
Q6DKI1	RPL7L1	INM:AR02	0.0603534	10.061	0.176273	0.862142	0.980175	-5.17367
O14745	NHERF1	INM:AR02	-0.0279401	12.9176	-0.175873	0.862452	0.980175	-5.17373
Q86SF2	GALNT7	INM:AR02	0.0249548	12.6354	0.173788	0.864065	0.980175	-5.17399
Q92530	PSMF1	INM:AR02	0.0464297	15.0034	0.173665	0.86416	0.980175	-5.17401
P61604	HSPE1	INM:AR02	-0.0405795	16.3989	-0.173399	0.864367	0.980175	-5.17404
Q15428	SF3A2	INM:AR02	-0.0481614	13.8475	-0.172579	0.865001	0.980175	-5.17415
O96006	ZBED1	INM:AR02	0.0278518	14.0337	0.172452	0.865099	0.980175	-5.17416
P41236	PPP1R2	INM:AR02	-0.0304101	13.124	-0.172205	0.86529	0.980175	-5.17419
P22392	NME2	INM:AR02	-0.0253825	13.6722	-0.171572	0.865781	0.980175	-5.17427
Q8NBJ5	COLGALT1	INM:AR02	0.0223383	13.7911	0.171434	0.865887	0.980175	-5.17429
Q8IYB3	SRRM1	INM:AR02	-0.0265015	12.3282	-0.170832	0.866353	0.980175	-5.17436
Q12905	ILF2	INM:AR02	-0.0251448	13.3828	-0.170156	0.866877	0.980175	-5.17445
Q96Q42	ALS2	INM:AR02	-0.0278908	13.8903	-0.170108	0.866914	0.980175	-5.17446
Q8TBP0	TBC1D16	INM:AR02	-0.0339096	13.3689	-0.169895	0.867079	0.980175	-5.17448
P25774	CTSS	INM:AR02	0.0310566	11.812	0.168331	0.86829	0.980175	-5.17468
Q00403	GTF2B	INM:AR02	-0.0266074	13.1014	-0.167598	0.868859	0.980175	-5.17477
Q8N137	CNTROB	INM:AR02	0.0480177	10.8945	0.166896	0.869402	0.980175	-5.17485
Q9Y2I8	WDR37	INM:AR02	-0.0777346	10.8296	-0.166732	0.86953	0.980175	-5.17487
O00268	TAF4	INM:AR02	0.0539616	10.1874	0.16641	0.869779	0.980175	-5.17491
Q8IZ83	ALDH16A1	INM:AR02	0.0319838	11.9429	0.165645	0.870372	0.980175	-5.175
O15145	ARPC3	INM:AR02	-0.0204122	13.9395	-0.165182	0.870731	0.980175	-5.17506
P04844	RPN2	INM:AR02	0.0298463	13.3567	0.165168	0.870741	0.980175	-5.17506
Q9NVK5	FGFR1OP2	INM:AR02	0.0257788	12.5764	0.164539	0.871229	0.980175	-5.17514
P09661	SNRPA1	INM:AR02	0.0222603	15.3989	0.164129	0.871547	0.980175	-5.17519
Q6J4K2	SLC8B1	INM:AR02	0.0324233	13.5982	0.163911	0.871715	0.980175	-5.17521
Q96RQ3	MCCC1	INM:AR02	-0.0336114	13.1714	-0.163513	0.872024	0.980175	-5.17526
P42704	LRPPRC	INM:AR02	0.0242894	13.9165	0.163389	0.87212	0.980175	-5.17527
O95352	ATG7	INM:AR02	0.0259877	13.0903	0.163343	0.872157	0.980175	-5.17528
O94906	PRPF6	INM:AR02	-0.0370829	12.2007	-0.16266	0.872686	0.980175	-5.17536
Q96T51	RUFY1	INM:AR02	-0.0349926	14.779	-0.162284	0.872977	0.980175	-5.17541
Q9UKK9	NUDT5	INM:AR02	-0.0242352	13.3168	-0.16225	0.873004	0.980175	-5.17541
P78344	EIF4G2	INM:AR02	-0.0214327	14.1574	-0.161842	0.87332	0.980175	-5.17546
Q96N66	MBOAT7	INM:AR02	-0.0321514	17.0842	-0.160494	0.874366	0.98021	-5.17562
Q96DM3	RMC1	INM:AR02	0.0253971	13.2289	0.160418	0.874425	0.98021	-5.17563
Q96I59	NARS2	INM:AR02	-0.06119	10.3212	-0.159482	0.87515	0.98021	-5.17574
Q9H223	EHD4	INM:AR02	-0.0426689	12.2566	-0.159068	0.875472	0.98021	-5.17578
Q00577	PURA	INM:AR02	0.0315497	11.7884	0.158895	0.875607	0.98021	-5.1758
Q5JSH3	WDR44	INM:AR02	-0.0196374	14.1745	-0.15795	0.876339	0.98025	-5.17591
Q96HN2	AHCYL2	INM:AR02	0.0314674	13.1855	0.156966	0.877103	0.98025	-5.17603
Q9GZV4	EIF5A2	INM:AR02	0.0426697	13.0674	0.156595	0.877392	0.98025	-5.17607
O95486	SEC24A	INM:AR02	0.0317801	11.9938	0.156525	0.877446	0.98025	-5.17608
Q7Z3J2	VPS35L	INM:AR02	-0.0190977	13.9209	-0.154452	0.879055	0.981252	-5.17631
P63104	YWHAZ	INM:AR02	0.0302391	18.1912	0.153422	0.879855	0.981252	-5.17643
P78417	GSTO1	INM:AR02	0.015954	17.1414	0.152258	0.880759	0.981252	-5.17656
Q13530	SERINC3	INM:AR02	-0.024867	14.0006	-0.151955	0.880995	0.981252	-5.17659
Q7Z739	YTHDF3	INM:AR02	0.0256429	12.3569	0.151643	0.881237	0.981252	-5.17663
Q6P597	KLC3	INM:AR02	-0.0272418	13.1975	-0.15092	0.881798	0.981252	-5.17671
Q8WVT3	TRAPPC12	INM:AR02	0.034055	12.6812	0.15067	0.881992	0.981252	-5.17674
Q14204	DYNC1H1	INM:AR02	0.0166819	15.2909	0.149696	0.882749	0.981252	-5.17684
P43307	SSR1	INM:AR02	0.0403271	12.9498	0.149535	0.882875	0.981252	-5.17686
O95571	ETHE1	INM:AR02	0.0226355	13.6476	0.149526	0.882881	0.981252	-5.17686
Q92572	AP3S1	INM:AR02	0.0229799	14.1289	0.148673	0.883545	0.981252	-5.17695
O00329	PIK3CD	INM:AR02	-0.0362624	12.1178	-0.146358	0.885344	0.981252	-5.1772
Q8TEW0	PARD3	INM:AR02	-0.0534177	10.8981	-0.145997	0.885624	0.981252	-5.17724
O60493	SNX3	INM:AR02	0.074702	12.0618	0.145814	0.885767	0.981252	-5.17726
Q9UKX3	MYH13	INM:AR02	-0.0241266	14.7397	-0.143937	0.887227	0.981252	-5.17746
Q5JTZ9	AARS2	INM:AR02	-0.0364703	11.7515	-0.143053	0.887914	0.981252	-5.17755
Q00610	CLTC	INM:AR02	0.0205391	14.3962	0.143032	0.887931	0.981252	-5.17756
Q13464	ROCK1	INM:AR02	-0.0220242	15.9613	-0.14235	0.888462	0.981252	-5.17763
P31946	YWHAB	INM:AR02	0.0250504	16.5971	0.141641	0.889013	0.981252	-5.1777
Q96K76	USP47	INM:AR02	0.024305	13.8289	0.140747	0.889708	0.981252	-5.17779
Q86V88	MDP1	INM:AR02	-0.0545741	12.0254	-0.140474	0.889921	0.981252	-5.17782
Q13561	DCTN2	INM:AR02	-0.0406998	14.338	-0.139926	0.890347	0.981252	-5.17788
Q96A65	EXOC4	INM:AR02	-0.029958	12.9228	-0.139537	0.89065	0.981252	-5.17792
P04843	RPN1	INM:AR02	0.0141505	17.5916	0.139404	0.890753	0.981252	-5.17793
P33176	KIF5B	INM:AR02	-0.0197713	13.1762	-0.139046	0.891032	0.981252	-5.17797
P26447	S100A4	INM:AR02	0.031561	14.1181	0.138837	0.891195	0.981252	-5.17799
Q8IYD1	GSPT2	INM:AR02	-0.0164727	12.3975	-0.138338	0.891583	0.981252	-5.17804
Q96A33	CCDC47	INM:AR02	0.0520595	14.1591	0.137698	0.892081	0.981252	-5.1781
Q13459	MYO9B	INM:AR02	-0.0194181	13.1193	-0.136261	0.893201	0.981252	-5.17825
P30046	DDT	INM:AR02	-0.0318435	13.6935	-0.135826	0.893539	0.981252	-5.17829
P42285	MTREX	INM:AR02	0.0165917	14.0438	0.135473	0.893814	0.981252	-5.17833
P57740	NUP107	INM:AR02	0.0177694	13.2188	0.135274	0.893969	0.981252	-5.17835
Q92903	CDS1	INM:AR02	-0.0220956	11.8762	-0.134012	0.894952	0.981252	-5.17847
Q6GTX8	LAIR1	INM:AR02	0.01999	12.807	0.133865	0.895066	0.981252	-5.17849
P30038	ALDH4A1	INM:AR02	-0.0293724	13.0862	-0.132455	0.896165	0.981252	-5.17862
O95182	NDUFA7	INM:AR02	-0.0239647	11.2003	-0.131822	0.896658	0.981252	-5.17868
P01857		INM:AR02	0.0195125	17.1156	0.131549	0.896871	0.981252	-5.17871
P49454	CENPF	INM:AR02	0.0287318	12.0917	0.127272	0.900204	0.981252	-5.17912
Q5JRA6	MIA3	INM:AR02	0.0278625	18.7535	0.125191	0.901827	0.981252	-5.17931
Q13418	ILK	INM:AR02	-0.0186568	14.8475	-0.124096	0.902681	0.981252	-5.17941
P46734	MAP2K3	INM:AR02	0.0151246	14.4943	0.123643	0.903034	0.981252	-5.17945
Q9H3H3	C11orf68	INM:AR02	0.0184796	14.0305	0.122611	0.903839	0.981252	-5.17954
Q9NZ08	ERAP1	INM:AR02	-0.0188277	14.6301	-0.122469	0.90395	0.981252	-5.17956
Q9HCE0	EPG5	INM:AR02	0.0257311	11.8205	0.121386	0.904795	0.981252	-5.17965
P50995	ANXA11	INM:AR02	0.0200582	16.321	0.121268	0.904887	0.981252	-5.17966
P55084	HADHB	INM:AR02	0.0183045	16.0927	0.121049	0.905058	0.981252	-5.17968
Q3KQU3	MAP7D1	INM:AR02	0.0278641	11.4551	0.120047	0.90584	0.981252	-5.17977
P49821	NDUFV1	INM:AR02	-0.0213177	12.4514	-0.118909	0.906728	0.981252	-5.17987
Q04206	RELA	INM:AR02	0.018035	12.8857	0.118494	0.907052	0.981252	-5.17991
Q6P1J9	CDC73	INM:AR02	0.039012	11.1421	0.117952	0.907475	0.981252	-5.17995
Q09666	AHNAK	INM:AR02	0.0151931	14.6153	0.117612	0.907741	0.981252	-5.17998
P83111	LACTB	INM:AR02	-0.0381168	12.166	-0.117528	0.907806	0.981252	-5.17999
O95248	SBF1	INM:AR02	-0.0279482	11.9541	-0.117363	0.907935	0.981252	-5.18
[truncated: 175 more rows]

## Sheet: INM_SMES
accession	gene_symbol	coef	logFC	AveExpr	t	P.Value	adj.P.Val	B
P18621	RPL17	INM:SMES	1.31459	14.2663	6.30448	7.5739e-06	0.0164657	3.47184
O75844	ZMPSTE24	INM:SMES	2.20375	12.5435	5.4146	4.49531e-05	0.0427121	2.01838
Q96M27	PRRC1	INM:SMES	0.874779	11.5745	5.28344	5.89403e-05	0.0427121	1.79304
Q8IZX4	TAF1L	INM:SMES	1.76124	18.8831	4.48478	0.000319099	0.124059	0.367988
P15153	RAC2	INM:SMES	0.953839	16.8365	4.39793	0.000384747	0.124059	0.208345
Q9H334	FOXP1	INM:SMES	1.32952	16.8498	4.39114	0.000390428	0.124059	0.195826
Q16873	LTC4S	INM:SMES	0.885854	13.9015	4.20523	0.000583709	0.124059	-0.148314
O00712	NFIB	INM:SMES	0.790448	18.5227	4.14144	0.000670368	0.124059	-0.267028
Q9UK41	VPS28	INM:SMES	-1.30932	12.8025	-4.12762	0.000690793	0.124059	-0.292785
Q14123	PDE1C	INM:SMES	-0.880801	12.6883	-4.06448	0.000792411	0.124059	-0.410622
Q9HBI0	PARVG	INM:SMES	-0.59081	13.959	-4.05744	0.000804636	0.124059	-0.423774
Q9NPI7	KRCC1	INM:SMES	-0.552467	17.3111	-4.05093	0.000816114	0.124059	-0.435943
Q9NYU1	UGGT2	INM:SMES	1.5789	13.0829	4.03377	0.000847155	0.124059	-0.468019
Q86VM9	ZC3H18	INM:SMES	1.10141	14.7823	4.02883	0.000856318	0.124059	-0.477265
Q8TF01	PNISR	INM:SMES	0.866625	14.2755	4.00882	0.000894432	0.124059	-0.514696
P00352	ALDH1A1	INM:SMES	0.640743	12.3762	3.98478	0.000942472	0.124059	-0.559677
P25786	PSMA1	INM:SMES	-0.540092	15.3509	-3.92465	0.00107436	0.124059	-0.672343
Q96DT5	DNAH11	INM:SMES	-1.59846	16.7405	-3.91618	0.00109438	0.124059	-0.688232
Q5THK1	PRR14L	INM:SMES	1.83654	13.9963	3.91316	0.00110161	0.124059	-0.693894
Q9Y5Y6	ST14	INM:SMES	-0.647067	13.4323	-3.87445	0.00119858	0.124059	-0.766517
Q6UW68	TMEM205	INM:SMES	-0.555025	12.8809	-3.85614	0.00124738	0.124059	-0.800874
P10124	SRGN	INM:SMES	-1.0882	15.2102	-3.81328	0.00136958	0.124059	-0.881364
O43760	SYNGR2	INM:SMES	0.890431	12.9437	3.79828	0.00141511	0.124059	-0.909538
Q9Y2X3	NOP58	INM:SMES	-0.446185	15.3835	-3.76373	0.00152584	0.124059	-0.97445
P07477	PRSS1	INM:SMES	0.691216	19.4846	3.74138	0.00160206	0.124059	-1.01646
P48960	ADGRE5	INM:SMES	1.18257	11.3251	3.74006	0.00160668	0.124059	-1.01894
Q13637	RAB32	INM:SMES	0.784506	13.9453	3.72516	0.00165976	0.124059	-1.04695
A6NGU5		INM:SMES	1.0447	12.9426	3.72299	0.00166764	0.124059	-1.05103
Q7KZI7	MARK2	INM:SMES	-0.765766	12.8025	-3.69651	0.00176677	0.124059	-1.10081
Q92504	SLC39A7	INM:SMES	-0.911722	10.6176	-3.69615	0.00176814	0.124059	-1.10148
Q9GZP4	PITHD1	INM:SMES	-0.611093	13.2406	-3.69593	0.00176901	0.124059	-1.1019
P78537	BLOC1S1	INM:SMES	-0.464255	12.9697	-3.65406	0.00193813	0.131672	-1.18061
Q9Y263	PLAA	INM:SMES	-0.620182	12.4913	-3.61885	0.00209276	0.137868	-1.2468
P27816	MAP4	INM:SMES	0.539022	14.0826	3.59515	0.00220371	0.13887	-1.29135
Q08722	CD47	INM:SMES	0.921654	14.7107	3.58853	0.00223572	0.13887	-1.30378
Q6ZUJ8	PIK3AP1	INM:SMES	-0.783638	10.7245	-3.55579	0.00240108	0.139663	-1.36532
Q14019	COTL1	INM:SMES	-0.677127	12.3796	-3.54731	0.00244583	0.139663	-1.38124
Q99735	MGST2	INM:SMES	0.751698	15.9852	3.53998	0.00248521	0.139663	-1.39502
Q96I99	SUCLG2	INM:SMES	0.700136	12.3578	3.52475	0.00256902	0.139663	-1.42362
P10809	HSPD1	INM:SMES	0.532782	15.5989	3.51694	0.0026131	0.139663	-1.43829
P08758	ANXA5	INM:SMES	-0.519643	14.9321	-3.51329	0.00263394	0.139663	-1.44514
Q09028	RBBP4	INM:SMES	-0.653731	13.1075	-3.50046	0.00270853	0.140198	-1.46922
Q96EZ8	MCRS1	INM:SMES	-0.623279	10.8796	-3.46147	0.00294837	0.144591	-1.54239
Q8N5M9	JAGN1	INM:SMES	-0.586205	12.01	-3.44615	0.00304831	0.144591	-1.57114
Q7Z3B4	NUP54	INM:SMES	1.26581	14.2702	3.44375	0.00306426	0.144591	-1.57564
Q96SB8	SMC6	INM:SMES	-0.672464	13.2566	-3.43549	0.00311978	0.144591	-1.59112
O14974	PPP1R12A	INM:SMES	-0.653822	12.506	-3.43459	0.00312592	0.144591	-1.59282
P78324	SIRPA	INM:SMES	0.732009	14.1874	3.42201	0.00321253	0.145501	-1.61638
Q02040	AKAP17A	INM:SMES	0.814862	12.0646	3.36383	0.00364537	0.158487	-1.72536
Q13148	TARDBP	INM:SMES	-0.603318	13.8794	-3.35934	0.00368107	0.158487	-1.73376
Q9HB07		INM:SMES	-0.510398	11.9595	-3.34898	0.00376481	0.158487	-1.75314
O14802	POLR3A	INM:SMES	1.03598	19.0879	3.33831	0.00385294	0.158487	-1.77309
Q15365	PCBP1	INM:SMES	1.2773	14.5707	3.33702	0.00386375	0.158487	-1.7755
O60888	CUTA	INM:SMES	0.768323	13.0386	3.32055	0.0040043	0.159846	-1.8063
P25398	RPS12	INM:SMES	0.459892	14.524	3.316	0.00404394	0.159846	-1.81479
Q9NP72	RAB18	INM:SMES	0.3788	16.8458	3.3027	0.0041622	0.161583	-1.83963
Q9H1E5	TMX4	INM:SMES	0.653185	15.0089	3.25623	0.00460292	0.170706	-1.92633
Q9UKV3	ACIN1	INM:SMES	-0.479966	13.92	-3.25504	0.0046148	0.170706	-1.92855
Q8IWZ3	ANKHD1	INM:SMES	1.056	12.4994	3.25324	0.00463279	0.170706	-1.9319
Q5TCX8	MAP3K21	INM:SMES	1.2426	12.9186	3.23483	0.00482103	0.174682	-1.9662
Q9HCE1	MOV10	INM:SMES	0.59535	12.2074	3.22445	0.00493042	0.175717	-1.98553
Q9H773	DCTPP1	INM:SMES	-0.423606	14.1298	-3.19491	0.00525534	0.179014	-2.04047
Q9P2D1	CHD7	INM:SMES	-0.548829	15.8885	-3.19006	0.00531061	0.179014	-2.04947
Q6ZU69	SPATA31F1	INM:SMES	0.867521	13.971	3.18631	0.00535383	0.179014	-2.05645
Q96DZ1	ERLEC1	INM:SMES	0.595031	11.4085	3.1853	0.00536546	0.179014	-2.05832
P08134	RHOC	INM:SMES	1.03099	17.555	3.17936	0.00543465	0.179014	-2.06935
Q5JPF3		INM:SMES	0.842624	16.6876	3.16279	0.00563243	0.179905	-2.10011
O00170	AIP	INM:SMES	-0.640583	12.5055	-3.15764	0.00569537	0.179905	-2.10967
Q02978	SLC25A11	INM:SMES	0.796966	14.0947	3.15645	0.00570995	0.179905	-2.11187
P31930	UQCRC1	INM:SMES	0.590285	13.9617	3.14282	0.00588017	0.180154	-2.13714
Q14114	LRP8	INM:SMES	1.04752	17.7248	3.13981	0.00591843	0.180154	-2.14272
O00505	KPNA3	INM:SMES	-0.405828	15.9715	-3.13606	0.00596645	0.180154	-2.14967
Q9HCE0	EPG5	INM:SMES	-0.656275	11.8205	-3.09596	0.0065042	0.19059	-2.22387
P42331	ARHGAP25	INM:SMES	-0.416374	15.3475	-3.09523	0.00651434	0.19059	-2.22521
Q15370	ELOB	INM:SMES	0.590324	12.7622	3.08296	0.00668852	0.19059	-2.24789
Q9UKF6	CPSF3	INM:SMES	0.677682	14.7735	3.08259	0.0066938	0.19059	-2.24857
Q8N423		INM:SMES	0.478792	13.6144	3.07867	0.00675042	0.19059	-2.2558
Q16630	CPSF6	INM:SMES	-0.590574	14.2692	-3.04932	0.00718936	0.196222	-2.30993
Q00839	HNRNPU	INM:SMES	-0.534736	12.6153	-3.04728	0.00722087	0.196222	-2.31368
P13637	ATP1A3	INM:SMES	0.478619	13.8476	3.03746	0.0073745	0.196222	-2.33176
Q7Z7H5	TMED4	INM:SMES	0.741247	13.4786	3.03134	0.00747187	0.196222	-2.34303
O75427	LRCH4	INM:SMES	-0.420878	12.3068	-3.02379	0.00759372	0.196222	-2.35692
A2AJT9	BCLAF3	INM:SMES	-0.777827	10.4023	-3.02226	0.00761876	0.196222	-2.35974
P35232	PHB1	INM:SMES	0.632112	15.9998	3.01983	0.00765843	0.196222	-2.3642
P27105	STOM	INM:SMES	0.476592	16.0481	3.01525	0.00773388	0.196222	-2.37262
Q96SZ5	ADO	INM:SMES	-0.668693	13.5431	-3.00817	0.00785204	0.196222	-2.38563
Q6NUK1	SLC25A24	INM:SMES	-0.354702	15.4295	-3.00814	0.00785249	0.196222	-2.38568
P52948	NUP98	INM:SMES	-0.380597	12.8874	-2.98857	0.00818824	0.200097	-2.42161
P14543	NID1	INM:SMES	0.46318	15.1695	2.98837	0.00819163	0.200097	-2.42196
Q86UX7	FERMT3	INM:SMES	0.631347	15.2193	2.98138	0.00831504	0.200854	-2.43479
Q8NFA0	USP32	INM:SMES	-0.62162	11.5824	-2.96618	0.00858936	0.204777	-2.46262
P06731	CEACAM5	INM:SMES	0.487248	16.8218	2.96137	0.00867801	0.204777	-2.47143
Q9NTI5	PDS5B	INM:SMES	-0.374786	13.2686	-2.954	0.00881563	0.204777	-2.48492
P10515	DLAT	INM:SMES	-0.690089	14.0121	-2.95052	0.00888129	0.204777	-2.49128
P33316	DUT	INM:SMES	1.16843	11.6036	2.94674	0.00895315	0.204777	-2.49819
Q9BZL4	PPP1R12C	INM:SMES	-0.461583	13.2553	-2.94208	0.0090426	0.204777	-2.50671
Q14254	FLOT2	INM:SMES	0.823525	13.8907	2.92176	0.00944261	0.211631	-2.5438
Q96N11	INTS15	INM:SMES	1.09357	11.5673	2.91236	0.00963356	0.213708	-2.56094
Q8WWM7	ATXN2L	INM:SMES	-0.593949	10.7767	-2.8725	0.010485	0.229209	-2.63344
Q9H3S1	SEMA4A	INM:SMES	0.879114	10.513	2.86664	0.0106162	0.229209	-2.64407
Q9H9B4	SFXN1	INM:SMES	-0.476538	14.0642	-2.85752	0.0108235	0.229209	-2.66061
Q8WWI5	SLC44A1	INM:SMES	0.496573	10.7673	2.85587	0.0108616	0.229209	-2.66362
Q01844	EWSR1	INM:SMES	-0.394945	13.1056	-2.854	0.0109047	0.229209	-2.66701
Q96L92	SNX27	INM:SMES	0.416853	13.9192	2.84464	0.0111231	0.229209	-2.68397
Q96G03	PGM2	INM:SMES	-0.590084	14.418	-2.84342	0.0111518	0.229209	-2.68617
Q9UHL4	DPP7	INM:SMES	-0.33605	14.2477	-2.84241	0.0111758	0.229209	-2.688
Q6RI45	BRWD3	INM:SMES	1.6657	17.1313	2.83787	0.0112837	0.22926	-2.69622
P83881	RPL36A	INM:SMES	-0.660594	12.1676	-2.83114	0.0114456	0.230395	-2.70839
Q9H9A6	LRRC40	INM:SMES	-0.41161	12.0411	-2.82114	0.0116901	0.233159	-2.72645
P35580	MYH10	INM:SMES	0.680345	17.6552	2.81619	0.0118131	0.233469	-2.73539
P04075	ALDOA	INM:SMES	0.794322	17.2633	2.79241	0.0124216	0.239752	-2.77828
Q9Y296	TRAPPC4	INM:SMES	0.585509	13.0087	2.79089	0.0124613	0.239752	-2.781
P10768	ESD	INM:SMES	-0.49177	12.466	-2.77735	0.0128223	0.239752	-2.80537
Q9Y4I1	MYO5A	INM:SMES	0.730652	17.1611	2.77298	0.0129409	0.239752	-2.81323
Q14847	LASP1	INM:SMES	-0.427332	12.8946	-2.77049	0.0130089	0.239752	-2.8177
P02750	LRG1	INM:SMES	-0.447412	17.3616	-2.77013	0.0130187	0.239752	-2.81834
Q9UJS0	SLC25A13	INM:SMES	0.882543	13.8419	2.76358	0.0131996	0.239752	-2.83011
P13861	PRKAR2A	INM:SMES	-0.478237	11.5751	-2.75939	0.0133166	0.239752	-2.83763
Q8TCT9	HM13	INM:SMES	-0.412548	14.9226	-2.7509	0.0135563	0.239752	-2.85285
Q13596	SNX1	INM:SMES	-0.464688	12.9019	-2.74803	0.0136384	0.239752	-2.85799
P80723	BASP1	INM:SMES	0.532064	14.7245	2.74784	0.0136439	0.239752	-2.85833
Q9Y2Z4	YARS2	INM:SMES	1.0689	12.1392	2.74472	0.0137337	0.239752	-2.86393
Q9Y673	ALG5	INM:SMES	0.645063	12.6279	2.73697	0.013959	0.239752	-2.87779
P22626	HNRNPA2B1	INM:SMES	-0.393732	18.981	-2.73648	0.0139734	0.239752	-2.87867
Q9UBR2	CTSZ	INM:SMES	-0.337421	15.4978	-2.7346	0.0140289	0.239752	-2.88205
P51153	RAB13	INM:SMES	0.4013	15.7585	2.73211	0.0141023	0.239752	-2.8865
Q86UE4	MTDH	INM:SMES	-0.472637	13.3586	-2.7315	0.0141204	0.239752	-2.88759
P11215	ITGAM	INM:SMES	0.433481	17.3839	2.731	0.0141351	0.239752	-2.88847
P62491	RAB11A	INM:SMES	0.389747	14.9342	2.72794	0.0142263	0.239752	-2.89395
Q6P1A2	LPCAT3	INM:SMES	0.789892	12.8024	2.72138	0.0144234	0.241204	-2.90567
Q14012	CAMK1	INM:SMES	-0.585934	16.6994	-2.71593	0.0145892	0.242115	-2.9154
Q15286	RAB35	INM:SMES	0.39609	18.1255	2.70361	0.0149708	0.246565	-2.93738
Q9Y450	HBS1L	INM:SMES	-0.502498	11.731	-2.69156	0.0153532	0.24839	-2.95884
O75367	MACROH2A1	INM:SMES	0.665114	15.3997	2.68958	0.0154168	0.24839	-2.96235
Q9UJW0	DCTN4	INM:SMES	-0.578756	13.3648	-2.68935	0.0154244	0.24839	-2.96277
P23588	EIF4B	INM:SMES	-0.48031	12.9715	-2.68077	0.0157035	0.249303	-2.97802
Q9P0P0	RNF181	INM:SMES	0.567033	11.905	2.68056	0.0157104	0.249303	-2.9784
Q1KMD3	HNRNPUL2	INM:SMES	-0.39531	13.5611	-2.67624	0.0158527	0.249738	-2.98607
Q96CX2	KCTD12	INM:SMES	-0.439682	15.9993	-2.66409	0.0162603	0.250293	-3.00764
Q8IXI2	RHOT1	INM:SMES	0.429261	13.9458	2.66001	0.0163991	0.250293	-3.01486
P07951	TPM2	INM:SMES	-0.455124	14.6879	-2.65793	0.0164704	0.250293	-3.01855
P10114	RAP2A	INM:SMES	-0.605725	12.5578	-2.65655	0.0165181	0.250293	-3.021
P38606	ATP6V1A	INM:SMES	0.556565	14.3574	2.65371	0.0166161	0.250293	-3.02603
P31153	MAT2A	INM:SMES	-0.525248	12.0119	-2.65258	0.0166554	0.250293	-3.02804
P06865	HEXA	INM:SMES	-0.342946	14.9044	-2.65046	0.016729	0.250293	-3.03178
Q13564	NAE1	INM:SMES	-0.470698	14.411	-2.64817	0.016809	0.250293	-3.03583
Q684P5	RAP1GAP2	INM:SMES	0.502809	12.659	2.64263	0.0170041	0.251476	-3.04563
Q99719	SEPTIN5	INM:SMES	0.665686	14.5334	2.63515	0.0172711	0.253699	-3.05886
Q9Y225	RNF24	INM:SMES	-0.482441	13.0292	-2.628	0.0175299	0.255189	-3.07148
P48426	PIP4K2A	INM:SMES	-0.389302	14.875	-2.62397	0.0176773	0.255189	-3.07858
Q9UJX5	ANAPC4	INM:SMES	-0.587711	13.6541	-2.62268	0.0177247	0.255189	-3.08085
Q96JJ7	TMX3	INM:SMES	0.555937	14.5551	2.61781	0.0179052	0.256092	-3.08945
Q8TAQ2	SMARCC2	INM:SMES	-0.414426	12.9898	-2.60735	0.0182982	0.257257	-3.10786
P12236	SLC25A6	INM:SMES	0.736269	13.3897	2.605	0.0183879	0.257257	-3.112
Q86VR2	RETREG3	INM:SMES	-0.738959	9.6925	-2.60405	0.0184239	0.257257	-3.11366
Q06830	PRDX1	INM:SMES	-0.357697	13.2614	-2.60311	0.01846	0.257257	-3.11532
O75695	RP2	INM:SMES	0.358425	13.6164	2.59329	0.0188397	0.260875	-3.13257
P32942	ICAM3	INM:SMES	0.879692	12.4358	2.58962	0.0189836	0.261205	-3.13902
Q8IUE6	H2AC21	INM:SMES	0.996836	14.0594	2.58569	0.0191386	0.261477	-3.14591
Q9C0J8	WDR33	INM:SMES	-0.462236	13.8786	-2.58149	0.0193058	0.261477	-3.15328
Q9H1U4	MEGF9	INM:SMES	0.379597	13.8129	2.58004	0.0193642	0.261477	-3.15583
Q15366	PCBP2	INM:SMES	0.588424	13.1521	2.56809	0.0198486	0.266363	-3.17675
Q9NYU2	UGGT1	INM:SMES	-0.284271	15.3301	-2.56299	0.0200589	0.266649	-3.18567
P11413	G6PD	INM:SMES	-0.279691	17.147	-2.56053	0.0201612	0.266649	-3.18997
Q02252	ALDH6A1	INM:SMES	-0.346869	13.299	-2.55479	0.0204015	0.266649	-3.19999
P25685	DNAJB1	INM:SMES	-0.407284	15.5519	-2.55337	0.0204616	0.266649	-3.20248
Q92804	TAF15	INM:SMES	0.730505	13.005	2.55247	0.0204995	0.266649	-3.20404
P61289	PSME3	INM:SMES	-0.543559	12.406	-2.54996	0.0206058	0.266649	-3.20842
P49257	LMAN1	INM:SMES	0.420377	14.5281	2.53844	0.0211012	0.269007	-3.2285
Q9H074	PAIP1	INM:SMES	-0.462561	13.1804	-2.53488	0.0212566	0.269007	-3.2347
Q96FW1	OTUB1	INM:SMES	-0.457131	13.4209	-2.5346	0.0212691	0.269007	-3.2352
P63010	AP2B1	INM:SMES	-0.337036	13.9251	-2.53254	0.0213595	0.269007	-3.23878
P49593	PPM1F	INM:SMES	-0.637653	12.0697	-2.53147	0.0214067	0.269007	-3.24065
Q8TCU6	PREX1	INM:SMES	0.630852	13.2788	2.52757	0.0215789	0.269613	-3.24742
Q9UFN0	NIPSNAP3A	INM:SMES	0.429736	13.1793	2.52384	0.0217454	0.27014	-3.25391
O75477	ERLIN1	INM:SMES	0.382268	14.8478	2.51989	0.0219227	0.270796	-3.26077
P16949	STMN1	INM:SMES	-0.319373	18.4648	-2.50625	0.0225461	0.276092	-3.28443
P29375	KDM5A	INM:SMES	-0.377698	13.8653	-2.50497	0.0226055	0.276092	-3.28665
P25815	S100P	INM:SMES	-0.324755	18.7926	-2.49911	0.0228789	0.27701	-3.29679
Q15080	NCF4	INM:SMES	-0.471079	14.0261	-2.49408	0.0231161	0.27701	-3.30549
Q9NVA2	SEPTIN11	INM:SMES	-0.291276	14.4801	-2.49176	0.0232266	0.27701	-3.30951
Q96GX9	APIP	INM:SMES	-0.328289	14.3392	-2.48677	0.0234652	0.27701	-3.31813
P12270	TPR	INM:SMES	0.401939	12.7756	2.48669	0.0234692	0.27701	-3.31827
O00231	PSMD11	INM:SMES	0.56608	13.7825	2.48592	0.0235061	0.27701	-3.3196
Q05639	EEF1A2	INM:SMES	0.678003	17.1062	2.48387	0.0236049	0.27701	-3.32313
Q08380	LGALS3BP	INM:SMES	-0.47234	11.5278	-2.48052	0.0237677	0.27701	-3.32893
P38646	HSPA9	INM:SMES	0.36996	14.0572	2.47518	0.0240286	0.27701	-3.33812
P06899	H2BC11	INM:SMES	0.392273	20.0331	2.47443	0.0240659	0.27701	-3.33943
O96019	ACTL6A	INM:SMES	0.489435	14.0986	2.4721	0.0241805	0.27701	-3.34343
P0DOX7		INM:SMES	-0.736905	10.1066	-2.47055	0.0242575	0.27701	-3.34611
Q96MM3	ZFP42	INM:SMES	-0.894113	13.6861	-2.46895	0.0243371	0.27701	-3.34887
Q96F24	NRBF2	INM:SMES	0.833976	13.0375	2.45966	0.0248032	0.279395	-3.36484
O94804	STK10	INM:SMES	-0.328338	14.633	-2.45965	0.0248037	0.279395	-3.36486
Q08378	GOLGA3	INM:SMES	0.445821	12.2466	2.45705	0.0249362	0.27944	-3.36934
Q96RU7	TRIB3	INM:SMES	0.826456	16.7488	2.4504	0.0252767	0.279782	-3.38075
P36543	ATP6V1E1	INM:SMES	-0.440352	13.4385	-2.44962	0.0253168	0.279782	-3.38209
O95747	OXSR1	INM:SMES	-0.330279	14.1498	-2.44893	0.0253528	0.279782	-3.38328
Q9UHD2	TBK1	INM:SMES	0.633767	12.6853	2.4387	0.0258871	0.284235	-3.40082
P12956	XRCC6	INM:SMES	-0.417489	17.7829	-2.42871	0.0264189	0.285407	-3.41791
P04839	CYBB	INM:SMES	0.587252	14.9218	2.42664	0.0265305	0.285407	-3.42146
P43243	MATR3	INM:SMES	-0.284946	14.5817	-2.42408	0.0266687	0.285407	-3.42582
P13797	PLS3	INM:SMES	-0.407106	19.9542	-2.4229	0.0267333	0.285407	-3.42785
Q96P70	IPO9	INM:SMES	0.454072	12.0578	2.41765	0.0270202	0.285407	-3.43682
Q13094	LCP2	INM:SMES	-0.363829	12.3833	-2.41708	0.0270512	0.285407	-3.43778
Q4AC94	C2CD3	INM:SMES	-0.595734	14.6282	-2.41655	0.0270805	0.285407	-3.43869
O60437	PPL	INM:SMES	-0.367453	14.8177	-2.40895	0.0275016	0.285407	-3.45164
P35573	AGL	INM:SMES	-0.426553	11.7402	-2.40495	0.0277257	0.285407	-3.45846
P22314	UBA1	INM:SMES	-0.46748	13.6788	-2.40435	0.0277596	0.285407	-3.45948
Q7RTR2	NLRC3	INM:SMES	0.851109	14.2599	2.39826	0.0281045	0.285407	-3.46984
Q9P0M6	MACROH2A2	INM:SMES	0.84186	12.5575	2.39666	0.0281958	0.285407	-3.47256
Q9P2I0	CPSF2	INM:SMES	-0.433657	12.6713	-2.39524	0.028277	0.285407	-3.47497
Q5JSP0	FGD3	INM:SMES	-0.297004	13.454	-2.38959	0.0286029	0.285407	-3.48458
P30049	ATP5F1D	INM:SMES	0.528843	14.9592	2.38923	0.0286233	0.285407	-3.48518
P04066	FUCA1	INM:SMES	-0.518454	12.1458	-2.38777	0.0287082	0.285407	-3.48766
P16104	H2AX	INM:SMES	0.674994	21.3454	2.38649	0.0287829	0.285407	-3.48984
Q8NFU5	IPMK	INM:SMES	-0.563014	15.5853	-2.38613	0.0288036	0.285407	-3.49044
P22670	RFX1	INM:SMES	-0.331567	13.4303	-2.3856	0.0288346	0.285407	-3.49134
Q9NX00	TMEM160	INM:SMES	-0.280234	15.1198	-2.38458	0.0288943	0.285407	-3.49308
Q9BUJ2	HNRNPUL1	INM:SMES	0.40436	11.4223	2.38286	0.0289947	0.285407	-3.49598
Q9NR12	PDLIM7	INM:SMES	-0.364803	12.6018	-2.38205	0.0290423	0.285407	-3.49736
Q86X10	RALGAPB	INM:SMES	-0.30737	14.1592	-2.38204	0.029043	0.285407	-3.49738
P17676	CEBPB	INM:SMES	-0.36157	12.8632	-2.38031	0.0291446	0.285407	-3.50031
P08574	CYC1	INM:SMES	-0.494472	14.1456	-2.37664	0.0293622	0.286249	-3.50654
Q99571	P2RX4	INM:SMES	-0.41317	12.1228	-2.36985	0.0297678	0.288041	-3.51803
Q9NXG0	CNTLN	INM:SMES	-0.359914	13.2269	-2.36913	0.0298111	0.288041	-3.51924
P19338	NCL	INM:SMES	0.795361	13.0244	2.36559	0.030025	0.288824	-3.52523
Q8TEH3	DENND1A	INM:SMES	-0.428297	11.8995	-2.36079	0.0303174	0.290352	-3.53334
Q9H082	RAB33B	INM:SMES	0.47911	14.1535	2.3554	0.0306488	0.292239	-3.54244
P53367	ARFIP1	INM:SMES	-0.370626	13.4835	-2.35098	0.0309225	0.293561	-3.54988
Q9BT09	CNPY3	INM:SMES	-0.501774	13.36	-2.34726	0.0311552	0.294484	-3.55614
P31949	S100A11	INM:SMES	0.549315	16.8946	2.34277	0.0314382	0.295873	-3.56371
Q9Y3A6	TMED5	INM:SMES	-0.407122	12.0209	-2.33855	0.0317064	0.29626	-3.57081
Q8WXI9	GATAD2B	INM:SMES	-0.486176	15.2666	-2.33578	0.0318836	0.29626	-3.57546
Q9UP83	COG5	INM:SMES	-0.396914	12.8175	-2.33439	0.0319728	0.29626	-3.5778
P61086	UBE2K	INM:SMES	-0.817872	12.4814	-2.3335	0.03203	0.29626	-3.57929
Q96IJ6	GMPPA	INM:SMES	-0.374232	13.4994	-2.33147	0.0321607	0.29626	-3.58269
Q96QK1	VPS35	INM:SMES	-0.430648	14.2697	-2.32366	0.0326697	0.299679	-3.59581
Q96IC2	REXO5	INM:SMES	-0.478837	12.2561	-2.31521	0.0332281	0.301857	-3.60995
P53396	ACLY	INM:SMES	-0.301912	14.1886	-2.31228	0.0334241	0.301857	-3.61486
P67809	YBX1	INM:SMES	-0.795527	11.1894	-2.31039	0.0335503	0.301857	-3.618
Q9HC38	GLOD4	INM:SMES	-0.416711	11.1835	-2.30697	0.033781	0.301857	-3.62372
Q6P5R6	RPL22L1	INM:SMES	0.415509	15.6158	2.30657	0.0338085	0.301857	-3.6244
Q9NX63	CHCHD3	INM:SMES	0.473939	12.4263	2.30608	0.0338415	0.301857	-3.62521
Q9UBS4	DNAJB11	INM:SMES	-0.295515	16.6774	-2.30391	0.0339887	0.301857	-3.62883
P30048	PRDX3	INM:SMES	0.513137	14.669	2.30144	0.0341575	0.301857	-3.63296
P36507	MAP2K2	INM:SMES	0.360523	15.2406	2.29806	0.0343889	0.301857	-3.63859
Q14134	TRIM29	INM:SMES	0.519553	12.4348	2.29329	0.0347188	0.301857	-3.64654
Q9HBR0	SLC38A10	INM:SMES	-0.347146	13.3843	-2.29322	0.0347239	0.301857	-3.64667
Q9UPT5	EXOC7	INM:SMES	-0.307626	12.9753	-2.29024	0.0349312	0.301857	-3.65163
P10153	RNASE2	INM:SMES	-0.358383	12.3921	-2.28743	0.035128	0.301857	-3.6563
Q6JBY9	RCSD1	INM:SMES	-0.448125	15.7542	-2.28611	0.0352205	0.301857	-3.65849
Q92900	UPF1	INM:SMES	-0.275666	13.085	-2.28355	0.0354012	0.301857	-3.66276
Q96CN9	GCC1	INM:SMES	-0.398819	13.5187	-2.28313	0.0354305	0.301857	-3.66344
Q9NRD1	FBXO6	INM:SMES	0.416348	11.5364	2.28082	0.0355943	0.301857	-3.66728
P52597	HNRNPF	INM:SMES	-0.288116	12.9584	-2.28045	0.0356204	0.301857	-3.66789
Q9Y3I0	RTCB	INM:SMES	-0.425421	14.5209	-2.28038	0.0356259	0.301857	-3.66802
O60313	OPA1	INM:SMES	0.509907	12.9809	2.27879	0.0357391	0.301857	-3.67066
Q9Y487	ATP6V0A2	INM:SMES	-0.398477	12.3282	-2.27761	0.035823	0.301857	-3.67261
Q00765	REEP5	INM:SMES	0.343855	14.6369	2.27315	0.0361428	0.303377	-3.68001
P17844	DDX5	INM:SMES	-0.39372	14.1579	-2.26708	0.0365831	0.305184	-3.69008
P45880	VDAC2	INM:SMES	0.934953	11.8204	2.26631	0.0366389	0.305184	-3.69135
P40937	RFC5	INM:SMES	0.547284	11.4897	2.26155	0.0369877	0.306012	-3.69923
Q8WUU5	GATAD1	INM:SMES	-0.377043	11.3013	-2.25989	0.0371103	0.306012	-3.70198
Q93009	USP7	INM:SMES	-0.338731	13.8237	-2.25921	0.0371606	0.306012	-3.70311
Q9Y4A5	TRRAP	INM:SMES	0.968683	13.2923	2.25238	0.0376685	0.309024	-3.71439
Q86YP4	GATAD2A	INM:SMES	0.446335	12.4304	2.2411	0.038522	0.312616	-3.73299
O60264	SMARCA5	INM:SMES	0.283428	13.7955	2.24081	0.038544	0.312616	-3.73347
P32121	ARRB2	INM:SMES	0.390613	16.463	2.23983	0.0386189	0.312616	-3.73508
Q7KZ85	SUPT6H	INM:SMES	0.427156	13.9058	2.23733	0.0388105	0.312616	-3.73918
Q96DI7	SNRNP40	INM:SMES	-0.417526	11.9541	-2.23651	0.0388737	0.312616	-3.74053
P15848	ARSB	INM:SMES	-0.347686	14.6137	-2.23528	0.0389691	0.312616	-3.74257
O75886	STAM2	INM:SMES	0.418306	12.1891	2.23189	0.0392315	0.31319	-3.74814
P62318	SNRPD3	INM:SMES	-0.420441	16.6824	-2.23064	0.0393288	0.31319	-3.75019
Q9UHG3	PCYOX1	INM:SMES	0.367347	14.2927	2.22188	0.040017	0.315801	-3.76458
A0A075B759	PPIAL4F	INM:SMES	-0.843542	15.2292	-2.21906	0.0402407	0.315801	-3.7692
Q13164	MAPK7	INM:SMES	-0.277422	13.8048	-2.21836	0.0402961	0.315801	-3.77034
P62191	PSMC1	INM:SMES	-0.356353	14.4444	-2.21749	0.0403658	0.315801	-3.77177
O00453	LST1	INM:SMES	-0.296534	16.2136	-2.21706	0.0404002	0.315801	-3.77247
Q12888	TP53BP1	INM:SMES	0.644104	10.7398	2.21507	0.0405589	0.315801	-3.77572
O15085	ARHGEF11	INM:SMES	-0.585974	9.65088	-2.21365	0.0406736	0.315801	-3.77806
P62249	RPS16	INM:SMES	-0.341904	14.2129	-2.21154	0.0408433	0.315831	-3.78151
Q9P1U1	ACTR3B	INM:SMES	-0.401822	16.7314	-2.20999	0.0409679	0.315831	-3.78403
Q8NI08	NCOA7	INM:SMES	0.425913	11.4509	2.20813	0.0411192	0.315877	-3.78708
P08631	HCK	INM:SMES	-0.44759	14.3648	-2.20482	0.0413887	0.315924	-3.79249
Q9BX10	GTPBP2	INM:SMES	-0.727748	11.8811	-2.20421	0.0414386	0.315924	-3.79349
P26038	MSN	INM:SMES	-0.329243	16.4386	-2.20271	0.0415614	0.315924	-3.79594
Q9BSJ8	ESYT1	INM:SMES	0.554153	12.3497	2.1998	0.0418005	0.316198	-3.80069
O75475	PSIP1	INM:SMES	-0.368953	13.4981	-2.1972	0.0420151	0.316198	-3.80492
P46926	GNPDA1	INM:SMES	-0.512287	12.3719	-2.19593	0.0421205	0.316198	-3.807
P49006	MARCKSL1	INM:SMES	-0.351478	11.5758	-2.19427	0.0422586	0.316198	-3.8097
O43353	RIPK2	INM:SMES	-0.449799	12.865	-2.19348	0.0423245	0.316198	-3.81099
Q68CP4	HGSNAT	INM:SMES	0.504391	12.5477	2.18883	0.042713	0.316374	-3.81855
P11310	ACADM	INM:SMES	0.703545	14.2061	2.18779	0.0428011	0.316374	-3.82025
P43686	PSMC4	INM:SMES	-0.282547	15.3611	-2.18649	0.0429104	0.316374	-3.82236
Q12800	TFCP2	INM:SMES	-0.255203	13.6411	-2.18524	0.0430163	0.316374	-3.8244
P51608	MECP2	INM:SMES	0.735206	11.4873	2.18435	0.0430915	0.316374	-3.82584
Q96GG9	DCUN1D1	INM:SMES	-0.39024	13.294	-2.18196	0.0432942	0.316374	-3.82972
P50395	GDI2	INM:SMES	-0.311915	16.0351	-2.18017	0.0434471	0.316374	-3.83263
O00410	IPO5	INM:SMES	0.403271	13.0369	2.17797	0.0436353	0.316374	-3.8362
P19823	ITIH2	INM:SMES	0.659781	13.8819	2.17771	0.0436578	0.316374	-3.83663
O14602	EIF1AY	INM:SMES	-0.239898	14.6748	-2.16988	0.0443342	0.319514	-3.84932
P11279	LAMP1	INM:SMES	0.354489	16.0975	2.16929	0.0443851	0.319514	-3.85027
P09661	SNRPA1	INM:SMES	-0.293899	15.3989	-2.16697	0.0445877	0.319913	-3.85403
Q9HDC9	APMAP	INM:SMES	0.654018	18.6958	2.16063	0.0451456	0.321189	-3.86429
P12268	IMPDH2	INM:SMES	0.46261	14.8493	2.16025	0.0451787	0.321189	-3.86489
P30613	PKLR	INM:SMES	-0.459076	18.9983	-2.15698	0.0454698	0.321189	-3.87019
Q92667	AKAP1	INM:SMES	-0.297677	13.7147	-2.15654	0.0455089	0.321189	-3.8709
Q9NSK0	KLC4	INM:SMES	-0.613667	10.3296	-2.15623	0.045536	0.321189	-3.87139
P01889	HLA-B	INM:SMES	0.619018	13.676	2.15493	0.045652	0.321189	-3.87349
Q9BVK6	TMED9	INM:SMES	0.46372	14.498	2.14774	0.0462985	0.324687	-3.88508
Q9NRF8	CTPS2	INM:SMES	0.401367	11.9881	2.14397	0.0466412	0.325348	-3.89115
O60493	SNX3	INM:SMES	1.09809	12.0618	2.14341	0.0466921	0.325348	-3.89205
A6QL63	ABTB3	INM:SMES	-0.483877	13.0535	-2.14101	0.0469119	0.325611	-3.89592
P61011	SRP54	INM:SMES	0.748845	12.6039	2.13794	0.0471941	0.325611	-3.90086
Q9H2H8	PPIL3	INM:SMES	-0.363181	14.776	-2.13556	0.0474139	0.325611	-3.90468
O75390	CS	INM:SMES	0.354323	16.2361	2.13435	0.0475259	0.325611	-3.90662
Q8WUZ0	BCL7C	INM:SMES	0.578626	11.2324	2.13317	0.0476352	0.325611	-3.90851
Q15691	MAPRE1	INM:SMES	-0.637567	13.4838	-2.13305	0.0476465	0.325611	-3.90871
P20337	RAB3B	INM:SMES	1.06161	15.2821	2.12926	0.0479996	0.325611	-3.91478
Q6PCE3	PGM2L1	INM:SMES	-0.554882	11.7796	-2.1292	0.0480051	0.325611	-3.91488
Q52LJ0	FAM98B	INM:SMES	-0.405831	14.6375	-2.1266	0.0482492	0.325611	-3.91905
P10606	COX5B	INM:SMES	0.298994	18.4294	2.12583	0.0483213	0.325611	-3.92028
Q8WVV9	HNRNPLL	INM:SMES	-0.429639	11.3154	-2.12524	0.0483774	0.325611	-3.92123
Q8WXI2	CNKSR2	INM:SMES	-0.389941	14.6756	-2.12318	0.0485717	0.325894	-3.92453
Q9BYK8	HELZ2	INM:SMES	-0.332935	17.748	-2.12162	0.0487192	0.325894	-3.92702
Q9NRY4	ARHGAP35	INM:SMES	0.658446	15.6612	2.11529	0.049323	0.328921	-3.93714
P51531	SMARCA2	INM:SMES	-0.46532	11.5032	-2.10545	0.0502751	0.333649	-3.95285
Q06323	PSME1	INM:SMES	0.667087	13.5641	2.10381	0.0504359	0.333649	-3.95547
P25325	MPST	INM:SMES	0.55775	11.5464	2.1022	0.0505934	0.333649	-3.95803
O43566	RGS14	INM:SMES	0.361392	13.1896	2.10114	0.0506976	0.333649	-3.95971
Q460N5	PARP14	INM:SMES	-0.436692	12.0596	-2.10011	0.0507993	0.333649	-3.96136
Q9Y314	NOSIP	INM:SMES	-0.45391	11.1314	-2.08618	0.0521885	0.341668	-3.98348
Q8TD55	PLEKHO2	INM:SMES	-0.353869	14.0427	-2.08202	0.0526101	0.341668	-3.99007
P42566	EPS15	INM:SMES	-0.336315	13.3578	-2.08173	0.0526397	0.341668	-3.99053
P17612	PRKACA	INM:SMES	-0.423408	12.7561	-2.08164	0.052649	0.341668	-3.99068
Q03518	TAP1	INM:SMES	0.47986	13.1045	2.07557	0.0532701	0.343918	-4.00028
Q9BQA1	WDR77	INM:SMES	-0.346858	14.1577	-2.07401	0.0534313	0.343918	-4.00276
Q02818	NUCB1	INM:SMES	-0.256719	15.0792	-2.07213	0.0536248	0.343918	-4.00572
P84090	ERH	INM:SMES	-0.43913	11.9033	-2.0721	0.0536285	0.343918	-4.00577
Q8WVC6	DCAKD	INM:SMES	0.525205	18.2167	2.06794	0.0540608	0.345671	-4.01234
P55060	CSE1L	INM:SMES	0.377462	12.9037	2.06431	0.05444	0.347075	-4.01806
O60306	AQR	INM:SMES	0.470214	12.1406	2.05524	0.0553998	0.349347	-4.03234
Q04726	TLE3	INM:SMES	-0.298913	13.3	-2.05493	0.0554327	0.349347	-4.03283
Q9P258	RCC2	INM:SMES	-0.295614	13.9489	-2.05446	0.0554832	0.349347	-4.03357
Q00403	GTF2B	INM:SMES	-0.326123	13.1014	-2.05422	0.0555086	0.349347	-4.03395
Q7LDG7	RASGRP2	INM:SMES	-0.285103	13.5166	-2.05301	0.0556381	0.349347	-4.03585
Q68DU8	KCTD16	INM:SMES	-0.344964	14.3908	-2.05186	0.0557606	0.349347	-4.03765
Q9NSD9	FARSB	INM:SMES	0.476987	13.5024	2.04928	0.0560377	0.350075	-4.0417
Q13555	CAMK2G	INM:SMES	-0.380148	12.6464	-2.04387	0.0566236	0.352722	-4.05019
Q9NTJ3	SMC4	INM:SMES	-0.531241	14.7088	-2.04228	0.0567969	0.35279	-4.05268
P0C7P4		INM:SMES	0.282166	15.445	2.03918	0.057136	0.353885	-4.05754
P63092	GNAS	INM:SMES	-0.527327	14.8777	-2.0363	0.0574526	0.353992	-4.06205
Q9Y6D5	ARFGEF2	INM:SMES	-0.397936	14.0911	-2.03606	0.057479	0.353992	-4.06242
Q15172	PPP2R5A	INM:SMES	-0.332255	14.4273	-2.03044	0.0581015	0.356652	-4.0712
Q8NE71	ABCF1	INM:SMES	0.375796	17.6715	2.02844	0.0583249	0.356652	-4.07433
P45974	USP5	INM:SMES	0.345967	16.3339	2.02652	0.0585391	0.356652	-4.07732
P05141	SLC25A5	INM:SMES	0.696538	13.9408	2.02627	0.0585671	0.356652	-4.07771
O15027	SEC16A	INM:SMES	-0.267791	15.2386	-2.02204	0.059043	0.357469	-4.0843
Q9NZC3	GDE1	INM:SMES	0.509933	11.1894	2.02168	0.0590835	0.357469	-4.08486
P51553	IDH3G	INM:SMES	-0.684602	10.7921	-2.0207	0.0591945	0.357469	-4.08639
Q13315	ATM	INM:SMES	0.347199	12.2376	2.01712	0.0596014	0.357995	-4.09196
Q92820	GGH	INM:SMES	0.366214	12.5451	2.01593	0.0597369	0.357995	-4.09381
O75955	FLOT1	INM:SMES	0.409522	12.9763	2.01559	0.0597756	0.357995	-4.09434
P35998	PSMC2	INM:SMES	-0.295628	12.5527	-2.00521	0.0609726	0.361847	-4.11047
Q8TEQ6	GEMIN5	INM:SMES	-0.491004	12.31	-2.0051	0.0609844	0.361847	-4.11063
P04632	CAPNS1	INM:SMES	0.415383	14.4792	2.00424	0.0610844	0.361847	-4.11196
Q9NVR2	INTS10	INM:SMES	-0.292298	12.9808	-2.00377	0.0611393	0.361847	-4.11269
P62195	PSMC5	INM:SMES	-0.246132	13.6726	-2.00155	0.061399	0.361847	-4.11613
P28331	NDUFS1	INM:SMES	0.408044	13.3019	2.00139	0.0614174	0.361847	-4.11638
Q8N3D4	EHBP1L1	INM:SMES	0.313192	11.9662	1.99955	0.0616333	0.362138	-4.11923
Q8NEZ4	KMT2C	INM:SMES	0.506783	11.6856	1.99573	0.0620835	0.363799	-4.12514
P05109	S100A8	INM:SMES	0.447444	17.7442	1.98738	0.0630773	0.367816	-4.13803
Q9UJY5	GGA1	INM:SMES	-0.341184	14.7767	-1.98713	0.0631074	0.367816	-4.13842
P25098	GRK2	INM:SMES	-0.231558	17.0234	-1.98044	0.0639135	0.37138	-4.14872
Q8IX01	SUGP2	INM:SMES	-0.400714	12.4093	-1.97923	0.0640605	0.37138	-4.15058
P49750	YLPM1	INM:SMES	-0.30664	12.5394	-1.97506	0.0645692	0.373334	-4.15699
Q9NY33	DPP3	INM:SMES	-0.347753	12.242	-1.97252	0.0648811	0.373816	-4.1609
Q6P0Q8	MAST2	INM:SMES	0.465111	14.5429	1.97129	0.0650321	0.373816	-4.16278
Q16698	DECR1	INM:SMES	0.309153	15.5853	1.97019	0.0651685	0.373816	-4.16448
Q6IAA8	LAMTOR1	INM:SMES	0.28244	15.8423	1.96712	0.0655481	0.375004	-4.16918
P43034	PAFAH1B1	INM:SMES	-0.397875	14.4309	-1.96017	0.0664153	0.378553	-4.17982
Q9Y266	NUDC	INM:SMES	-0.331606	12.2045	-1.95937	0.0665166	0.378553	-4.18105
Q15477	SKIC2	INM:SMES	0.540493	10.3795	1.95537	0.0670211	0.378815	-4.18716
Q9NSE4	IARS2	INM:SMES	0.303474	12.6595	1.95495	0.0670743	0.378815	-4.18781
P09429	HMGB1	INM:SMES	-0.255207	18.2135	-1.95486	0.0670854	0.378815	-4.18794
Q9UQ88	CDK11A	INM:SMES	-0.393013	13.0306	-1.95071	0.0676126	0.379587	-4.19427
Q9BRT3	MIEN1	INM:SMES	-0.2924	13.2392	-1.95006	0.0676962	0.379587	-4.19527
Q9Y5B9	SUPT16H	INM:SMES	0.345187	13.9414	1.94909	0.0678204	0.379587	-4.19675
Q9Y3D6	FIS1	INM:SMES	-0.258398	14.738	-1.9483	0.0679206	0.379587	-4.19794
Q12874	SF3A3	INM:SMES	0.405801	14.0557	1.94502	0.0683426	0.380966	-4.20295
P61224	RAP1B	INM:SMES	0.80824	16.2997	1.94239	0.0686821	0.381879	-4.20695
Q7Z5K2	WAPL	INM:SMES	-0.307411	12.4687	-1.94064	0.0689083	0.38216	-4.2096
P17174	GOT1	INM:SMES	-0.370485	14.0077	-1.93823	0.0692226	0.382588	-4.21328
Q93100	PHKB	INM:SMES	-0.229073	15.2834	-1.93735	0.0693375	0.382588	-4.21462
P14317	HCLS1	INM:SMES	-0.350371	16.0241	-1.93406	0.069768	0.383989	-4.21961
Q9UBC2	EPS15L1	INM:SMES	-0.31779	13.1543	-1.93223	0.0700081	0.384338	-4.22238
O75914	PAK3	INM:SMES	-0.375708	12.2851	-1.92928	0.0703972	0.3855	-4.22685
P13807	GYS1	INM:SMES	-0.790853	11.5988	-1.92736	0.0706515	0.385921	-4.22976
O15173	PGRMC2	INM:SMES	-0.28201	15.0497	-1.92536	0.070918	0.386405	-4.23279
O00178	GTPBP1	INM:SMES	0.454081	15.1475	1.92058	0.0715564	0.388909	-4.24001
P20585	MSH3	INM:SMES	-0.390177	11.7953	-1.91607	0.0721639	0.390542	-4.24682
Q13627	DYRK1A	INM:SMES	-0.29433	13.7781	-1.91568	0.0722162	0.390542	-4.24741
Q9H330	TMEM245	INM:SMES	-0.415119	12.5581	-1.91258	0.0726372	0.390781	-4.25208
P30566	ADSL	INM:SMES	0.431407	12.126	1.91222	0.0726868	0.390781	-4.25263
O75964	ATP5MG	INM:SMES	0.468502	13.6723	1.91139	0.0727996	0.390781	-4.25388
A8MXV4	NUDT19	INM:SMES	-0.382042	11.7636	-1.90531	0.0736322	0.393826	-4.26303
Q9Y394	DHRS7	INM:SMES	0.573738	14.807	1.90461	0.0737292	0.393826	-4.26409
Q12907	LMAN2	INM:SMES	0.560993	13.7685	1.90253	0.0740164	0.394062	-4.26721
Q9Y2I8	WDR37	INM:SMES	-0.885922	10.8296	-1.9002	0.0743387	0.394062	-4.27071
Q9ULH1	ASAP1	INM:SMES	0.333251	12.9005	1.89942	0.074447	0.394062	-4.27187
P47897	QARS1	INM:SMES	-0.286672	14.0859	-1.89838	0.0745914	0.394062	-4.27343
Q13263	TRIM28	INM:SMES	-0.262986	12.2297	-1.89775	0.0746797	0.394062	-4.27438
P09493	TPM1	INM:SMES	-0.474463	13.5883	-1.89607	0.0749143	0.394343	-4.2769
P57740	NUP107	INM:SMES	0.248796	13.2188	1.89402	0.0752013	0.394592	-4.27997
Q3V6T2	CCDC88A	INM:SMES	-0.443419	11.8553	-1.89222	0.0754538	0.394592	-4.28266
Q92616	GCN1	INM:SMES	-0.265927	12.7972	-1.8901	0.0757536	0.394592	-4.28585
P30086	PEBP1	INM:SMES	-0.568867	10.9708	-1.88878	0.0759401	0.394592	-4.28782
Q6ZRS2	SRCAP	INM:SMES	0.539972	12.1545	1.8881	0.0760365	0.394592	-4.28884
P16219	ACADS	INM:SMES	0.250081	12.7957	1.88759	0.0761077	0.394592	-4.28959
P08246	ELANE	INM:SMES	-0.375701	20.5256	-1.88672	0.0762321	0.394592	-4.2909
P49916	LIG3	INM:SMES	-0.413446	12.4657	-1.87993	0.0772006	0.397506	-4.30102
Q8IWX8	CHERP	INM:SMES	-0.445516	12.7452	-1.87916	0.0773125	0.397506	-4.30218
Q8N511	TMEM199	INM:SMES	-0.313836	12.4199	-1.87753	0.0775462	0.397506	-4.3046
P28676	GCA	INM:SMES	0.480057	15.7472	1.87634	0.0777188	0.397506	-4.30639
B5ME19	EIF3CL	INM:SMES	0.54223	13.0535	1.87512	0.077895	0.397506	-4.3082
Q99704	DOK1	INM:SMES	0.311769	12.9909	1.87497	0.0779161	0.397506	-4.30842
Q13505	MTX1	INM:SMES	0.412259	11.0635	1.87388	0.0780749	0.397506	-4.31005
P11233	RALA	INM:SMES	0.322238	14.2651	1.86809	0.0789178	0.4003	-4.31865
P51858	HDGF	INM:SMES	-0.286878	13.6349	-1.86592	0.0792357	0.4003	-4.32186
P62333	PSMC6	INM:SMES	0.291949	12.7447	1.86545	0.0793058	0.4003	-4.32257
Q96AE4	FUBP1	INM:SMES	-0.225422	17.5777	-1.86508	0.0793602	0.4003	-4.32312
A6NJG2	SOWAHD	INM:SMES	-0.280277	12.7293	-1.86301	0.0796648	0.400522	-4.32619
Q14232	EIF2B1	INM:SMES	-0.322515	12.159	-1.86134	0.0799114	0.400522	-4.32866
Q7L5N7	LPCAT2	INM:SMES	0.300652	15.5382	1.86104	0.079957	0.400522	-4.32911
Q9H3Z4	DNAJC5	INM:SMES	-0.440288	10.8559	-1.85804	0.0804013	0.401822	-4.33354
P13010	XRCC5	INM:SMES	0.21083	15.5246	1.85094	0.081465	0.405736	-4.34405
O95479	H6PD	INM:SMES	0.233019	14.8962	1.85032	0.0815579	0.405736	-4.34496
Q9BPW8	NIPSNAP1	INM:SMES	-0.448623	12.924	-1.84842	0.0818454	0.405943	-4.34777
P01859		INM:SMES	-0.325341	14.6298	-1.84664	0.0821145	0.405943	-4.35039
Q8IWB7	WDFY1	INM:SMES	-0.479276	11.0043	-1.84489	0.0823802	0.405943	-4.35297
P17568	NDUFB7	INM:SMES	0.396155	13.113	1.84432	0.0824665	0.405943	-4.3538
Q9Y2K7	KDM2A	INM:SMES	-0.412342	11.3925	-1.84389	0.0825331	0.405943	-4.35445
Q8IYD1	GSPT2	INM:SMES	-0.218647	12.3975	-1.8362	0.0837113	0.408524	-4.36575
O75083	WDR1	INM:SMES	0.642916	12.4047	1.83534	0.083844	0.408524	-4.36702
Q13153	PAK1	INM:SMES	0.337573	19.141	1.83397	0.0840567	0.408524	-4.36903
P08590	MYL3	INM:SMES	0.519606	14.7938	1.8331	0.0841913	0.408524	-4.37031
Q9Y4G6	TLN2	INM:SMES	0.302711	14.7543	1.83218	0.0843331	0.408524	-4.37165
Q562E7	WDR81	INM:SMES	-0.207535	14.2102	-1.83088	0.084535	0.408524	-4.37356
Q14242	SELPLG	INM:SMES	0.432116	14.2607	1.82984	0.0846968	0.408524	-4.37508
Q13404	UBE2V1	INM:SMES	-0.322159	15.3436	-1.8297	0.0847199	0.408524	-4.3753
Q92556	ELMO1	INM:SMES	0.515481	11.9365	1.82951	0.0847489	0.408524	-4.37557
Q8N2G8	GHDC	INM:SMES	0.615993	11.2437	1.82468	0.0855048	0.411255	-4.38264
Q14457	BECN1	INM:SMES	-0.333709	11.728	-1.8215	0.0860061	0.411975	-4.38729
O95873	C6orf47	INM:SMES	-0.458291	10.9959	-1.82133	0.0860334	0.411975	-4.38754
P57772	EEFSEC	INM:SMES	-0.293283	12.6053	-1.81971	0.0862897	0.412294	-4.38991
Q49A26	GLYR1	INM:SMES	0.441718	12.2373	1.81748	0.0866429	0.413074	-4.39316
Q6ZMZ3	SYNE3	INM:SMES	0.361586	12.4875	1.81613	0.0868576	0.413191	-4.39513
O95466	FMNL1	INM:SMES	0.24237	14.4323	1.80989	0.0878579	0.416608	-4.40423
O94967	WDR47	INM:SMES	-0.336117	11.9329	-1.80926	0.0879592	0.416608	-4.40514
Q86TP1	PRUNE1	INM:SMES	-0.207676	14.0153	-1.80664	0.0883816	0.417496	-4.40895
P51809	VAMP7	INM:SMES	0.267465	14.4195	1.80511	0.0886291	0.417496	-4.41117
P46977	STT3A	INM:SMES	-0.211413	14.7138	-1.80176	0.0891745	0.417496	-4.41604
Q96FS4	SIPA1	INM:SMES	-0.234063	14.5671	-1.80164	0.0891934	0.417496	-4.41621
Q96GM8	TOE1	INM:SMES	0.403801	10.716	1.80065	0.0893557	0.417496	-4.41765
Q15907	RAB11B	INM:SMES	0.288039	17.1443	1.79984	0.0894889	0.417496	-4.41883
A1L390	PLEKHG3	INM:SMES	-0.368672	11.9585	-1.79982	0.0894908	0.417496	-4.41885
P20839	IMPDH1	INM:SMES	0.243694	15.4463	1.79864	0.0896844	0.417503	-4.42056
P49327	FASN	INM:SMES	-0.308376	13.5526	-1.79542	0.0902139	0.419071	-4.42523
Q8NHP8	PLBD2	INM:SMES	-0.283591	12.8074	-1.79039	0.0910461	0.420564	-4.43251
P27824	CANX	INM:SMES	-0.23115	17.6462	-1.78779	0.0914776	0.420564	-4.43625
Q15833	STXBP2	INM:SMES	0.275919	14.7313	1.78706	0.0916006	0.420564	-4.43732
Q92945	KHSRP	INM:SMES	-0.228896	16.5199	-1.78554	0.0918547	0.420564	-4.43951
O15117	FYB1	INM:SMES	-0.304082	13.2816	-1.78538	0.0918817	0.420564	-4.43974
Q07890	SOS2	INM:SMES	-0.648152	9.34307	-1.78514	0.0919215	0.420564	-4.44009
P02788	LTF	INM:SMES	0.276895	20.9997	1.78402	0.0921095	0.420564	-4.44171
Q99442	SEC62	INM:SMES	-0.688555	9.73054	-1.78307	0.092268	0.420564	-4.44307
O75934	BCAS2	INM:SMES	-0.286666	13.032	-1.78301	0.0922789	0.420564	-4.44316
Q9UHX1	PUF60	INM:SMES	0.404989	13.7362	1.78187	0.09247	0.420564	-4.4448
Q01130	SRSF2	INM:SMES	0.743175	13.9272	1.78025	0.0927436	0.420928	-4.44713
Q14194	CRMP1	INM:SMES	-0.252071	14.6312	-1.7735	0.0938891	0.424166	-4.45684
Q16555	DPYSL2	INM:SMES	0.255362	15.1526	1.77317	0.0939445	0.424166	-4.45731
Q9BZJ0	CRNKL1	INM:SMES	-0.3502	14.4843	-1.77248	0.0940624	0.424166	-4.4583
Q8N8E3	CEP112	INM:SMES	-0.329816	12.98	-1.77008	0.0944731	0.424166	-4.46174
Q9H3U1	UNC45A	INM:SMES	0.242669	13.7865	1.77001	0.094486	0.424166	-4.46185
Q13363	CTBP1	INM:SMES	0.298353	13.1793	1.76816	0.0948038	0.424166	-4.4645
Q7Z6P3		INM:SMES	-0.30932	13.6039	-1.76805	0.0948227	0.424166	-4.46466
Q9NY12	GAR1	INM:SMES	0.221284	15.9603	1.76535	0.0952879	0.425371	-4.46852
P09917	ALOX5	INM:SMES	0.448439	13.1658	1.76281	0.0957272	0.426457	-4.47216
Q96CW5	TUBGCP3	INM:SMES	0.362509	11.9716	1.75825	0.0965213	0.429115	-4.47867
Q7Z406	MYH14	INM:SMES	0.447598	16.1879	1.75623	0.0968744	0.429806	-4.48155
Q8IY21	DDX60	INM:SMES	-0.266509	12.6435	-1.75331	0.0973883	0.431206	-4.48572
Q01638	IL1RL1	INM:SMES	0.488055	12.7396	1.74728	0.0984547	0.434841	-4.4943
O95721	SNAP29	INM:SMES	0.243856	13.6247	1.74641	0.0986093	0.434841	-4.49554
P78536	ADAM17	INM:SMES	-0.293016	11.8079	-1.74324	0.0991751	0.436451	-4.50004
P60228	EIF3E	INM:SMES	0.329162	13.5683	1.73435	0.100777	0.442603	-4.51264
Q14258	TRIM25	INM:SMES	0.370208	13.6487	1.73246	0.10112	0.443215	-4.51531
Q96K76	USP47	INM:SMES	0.29875	13.8289	1.73002	0.101565	0.444022	-4.51876
P27361	MAPK3	INM:SMES	-0.292319	13.8866	-1.72922	0.101712	0.444022	-4.5199
P07900	HSP90AA1	INM:SMES	-0.250897	16.6698	-1.72709	0.102102	0.444828	-4.5229
P21675	TAF1	INM:SMES	-0.409644	12.1703	-1.7238	0.102707	0.44641	-4.52754
Q16836	HADH	INM:SMES	-0.438938	12.2224	-1.72289	0.102876	0.44641	-4.52883
O15143	ARPC1B	INM:SMES	0.375545	14.6641	1.72139	0.103152	0.446618	-4.53093
P23246	SFPQ	INM:SMES	-0.177171	15.2071	-1.71962	0.103481	0.446618	-4.53344
Q10588	BST1	INM:SMES	0.497523	13.5763	1.7193	0.10354	0.446618	-4.53388
Q659C4	LARP1B	INM:SMES	-0.557203	12.2152	-1.71689	0.103989	0.447669	-4.53727
Q9NPF4	OSGEP	INM:SMES	-0.317785	12.7469	-1.71262	0.104787	0.4495	-4.54326
O43488	AKR7A2	INM:SMES	-0.210925	12.8001	-1.71188	0.104926	0.4495	-4.5443
Q07960	ARHGAP1	INM:SMES	0.796042	13.5256	1.71072	0.105144	0.4495	-4.54592
Q14653	IRF3	INM:SMES	-0.237831	14.8589	-1.70883	0.105501	0.4495	-4.54858
Q15257	PTPA	INM:SMES	-0.383108	12.3441	-1.70846	0.10557	0.4495	-4.54909
P40123	CAP2	INM:SMES	0.707975	12.8034	1.70801	0.105655	0.4495	-4.54972
P24158	PRTN3	INM:SMES	-0.322402	22.3162	-1.70481	0.106262	0.450813	-4.5542
Q07864	POLE	INM:SMES	0.201078	15.1907	1.7042	0.106378	0.450813	-4.55506
Q15542	TAF5	INM:SMES	0.641749	11.7133	1.70048	0.107087	0.452018	-4.56025
P20810	CAST	INM:SMES	-0.248136	13.9877	-1.69935	0.107303	0.452018	-4.56183
Q9BYP7	WNK3	INM:SMES	-0.497848	13.6054	-1.69889	0.107391	0.452018	-4.56247
P80217	IFI35	INM:SMES	-0.201222	13.9531	-1.69721	0.107713	0.452018	-4.56481
Q9UMS4	PRPF19	INM:SMES	-0.353746	13.9542	-1.6963	0.107889	0.452018	-4.56609
O75064	DENND4B	INM:SMES	0.395586	12.2974	1.69619	0.10791	0.452018	-4.56624
P98175	RBM10	INM:SMES	0.321844	11.6605	1.69341	0.108445	0.452134	-4.5701
Q9UI09	NDUFA12	INM:SMES	-0.231187	13.8462	-1.69316	0.108494	0.452134	-4.57045
P16333	NCK1	INM:SMES	-0.319896	12.8014	-1.69281	0.108562	0.452134	-4.57094
P13073	COX4I1	INM:SMES	0.406568	11.8043	1.69126	0.108862	0.452341	-4.57309
P29401	TKT	INM:SMES	-0.231906	16.0034	-1.68875	0.109351	0.452341	-4.57659
P57088	TMEM33	INM:SMES	0.370417	12.8982	1.68834	0.109431	0.452341	-4.57716
O43615	TIMM44	INM:SMES	0.392455	11.3094	1.68785	0.109526	0.452341	-4.57785
Q5T4S7	UBR4	INM:SMES	-0.175968	15.4477	-1.68635	0.109818	0.452341	-4.57992
P22307	SCP2	INM:SMES	0.405503	13.6432	1.68614	0.10986	0.452341	-4.58022
O95977	S1PR4	INM:SMES	-0.22597	14.9572	-1.68388	0.110301	0.453298	-4.58335
O43464	HTRA2	INM:SMES	-0.196927	14.826	-1.68222	0.110627	0.453779	-4.58564
Q9Y606	PUS1	INM:SMES	0.268951	13.3069	1.68025	0.111016	0.454517	-4.58838
Q13435	SF3B2	INM:SMES	-0.215582	15.2551	-1.67718	0.111623	0.456144	-4.59263
Q9BXW7	HDHD5	INM:SMES	-0.394922	10.9777	-1.67489	0.112078	0.457145	-4.5958
Q9UBF8	PI4KB	INM:SMES	-0.613384	9.80105	-1.67302	0.112451	0.45736	-4.59838
O60885	BRD4	INM:SMES	-0.263352	12.5817	-1.67251	0.112552	0.45736	-4.59908
Q9Y2Z0	SUGT1	INM:SMES	-0.226016	13.5528	-1.67022	0.11301	0.458366	-4.60225
P14678	SNRPB	INM:SMES	0.49481	12.9761	1.66862	0.11333	0.458806	-4.60444
Q04759	PRKCQ	INM:SMES	0.542615	13.8768	1.66194	0.114678	0.46261	-4.61363
P07203	GPX1	INM:SMES	-0.255484	13.5933	-1.66186	0.114695	0.46261	-4.61375
O60869	EDF1	INM:SMES	-0.245422	12.2054	-1.65677	0.11573	0.464047	-4.62073
Q9NXH8	TOR4A	INM:SMES	-0.259055	12.9937	-1.65657	0.115771	0.464047	-4.621
Q08379	GOLGA2	INM:SMES	-0.374865	10.939	-1.65492	0.11611	0.464047	-4.62327
Q03405	PLAUR	INM:SMES	-0.424983	12.1898	-1.65428	0.116241	0.464047	-4.62415
P29597	TYK2	INM:SMES	-0.290308	13.6904	-1.65389	0.11632	0.464047	-4.62468
Q8TEW0	PARD3	INM:SMES	-0.60473	10.8981	-1.65281	0.116543	0.464047	-4.62616
P31942	HNRNPH3	INM:SMES	-0.30837	14.5575	-1.6528	0.116546	0.464047	-4.62618
O60476	MAN1A2	INM:SMES	-0.391335	14.9488	-1.64765	0.117607	0.467181	-4.63321
Q9BY43	CHMP4A	INM:SMES	0.268832	12.5381	1.64618	0.117913	0.467181	-4.63523
Q13393	PLD1	INM:SMES	0.398681	9.63661	1.64407	0.118351	0.467181	-4.63809
Q12972	PPP1R8	INM:SMES	-0.38248	12.125	-1.64383	0.118403	0.467181	-4.63843
O60826	CCDC22	INM:SMES	0.246525	12.7647	1.64123	0.118944	0.467181	-4.64197
Q15746	MYLK	INM:SMES	0.530017	14.2495	1.64027	0.119146	0.467181	-4.64328
P37198	NUP62	INM:SMES	-0.331968	11.9418	-1.63918	0.119373	0.467181	-4.64476
Q8WZ42	TTN	INM:SMES	0.733862	14.8874	1.63866	0.119483	0.467181	-4.64547
Q9H3K2	GHITM	INM:SMES	0.252001	13.3894	1.63711	0.119808	0.467181	-4.64757
Q96KQ4	PPP1R13B	INM:SMES	-0.317345	13.1157	-1.63695	0.119843	0.467181	-4.6478
P17213	BPI	INM:SMES	0.265773	19.7592	1.63635	0.11997	0.467181	-4.64862
Q6XQN6	NAPRT	INM:SMES	-0.443458	11.5611	-1.63556	0.120135	0.467181	-4.64968
O00471	EXOC5	INM:SMES	-0.423844	12.4751	-1.63529	0.120194	0.467181	-4.65006
P61916	NPC2	INM:SMES	0.300574	13.5089	1.63459	0.120341	0.467181	-4.651
P55957	BID	INM:SMES	-0.293928	12.8218	-1.63243	0.120797	0.468109	-4.65393
Q9H7L9	SUDS3	INM:SMES	-0.262468	12.3647	-1.63138	0.121022	0.468109	-4.65536
Q9BRR9	ARHGAP9	INM:SMES	-0.174088	14.8679	-1.63041	0.121226	0.468109	-4.65667
P99999	CYCS	INM:SMES	-0.334568	16.4393	-1.62855	0.121622	0.468805	-4.65919
O94888	UBXN7	INM:SMES	-0.332257	12.2834	-1.62579	0.122213	0.47025	-4.66293
P11234	RALB	INM:SMES	0.493699	12.2828	1.62395	0.122608	0.470642	-4.66542
P50548	ERF	INM:SMES	-0.686922	9.15529	-1.6233	0.122748	0.470642	-4.66631
Q9NQC3	RTN4	INM:SMES	-0.419113	18.4922	-1.62134	0.123169	0.471204	-4.66895
Q9P015	MRPL15	INM:SMES	0.517146	11.353	1.6206	0.123329	0.471204	-4.66995
P35749	MYH11	INM:SMES	0.247146	15.9367	1.61891	0.123693	0.471204	-4.67222
Q8TD84	DSCAML1	INM:SMES	-0.181204	14.9857	-1.61751	0.123996	0.471204	-4.67411
Q8N1G4	LRRC47	INM:SMES	0.321986	12.337	1.61653	0.124209	0.471204	-4.67543
P36542	ATP5F1C	INM:SMES	-0.296374	16.2307	-1.616	0.124325	0.471204	-4.67615
P05204	HMGN2	INM:SMES	-0.515576	16.5177	-1.6156	0.124412	0.471204	-4.67669
Q96QE3	ATAD5	INM:SMES	-0.46618	13.914	-1.6123	0.125132	0.472741	-4.68114
O95831	AIFM1	INM:SMES	-0.352591	12.3557	-1.61139	0.125329	0.472741	-4.68235
P52564	MAP2K6	INM:SMES	0.447203	13.0528	1.61075	0.12547	0.472741	-4.68322
Q9Y2X7	GIT1	INM:SMES	-0.292986	12.6368	-1.60766	0.126147	0.473741	-4.68736
Q6P597	KLC3	INM:SMES	-0.290172	13.1975	-1.60755	0.126171	0.473741	-4.68751
O60563	CCNT1	INM:SMES	0.27212	14.7638	1.60372	0.127016	0.476047	-4.69264
Q9Y3Q8	TSC22D4	INM:SMES	-0.365124	12.4297	-1.60145	0.12752	0.476047	-4.69569
P01009	SERPINA1	INM:SMES	0.246227	14.4638	1.60109	0.1276	0.476047	-4.69617
Q9UI08	EVL	INM:SMES	-0.342183	10.9398	-1.60051	0.12773	0.476047	-4.69695
P07108	DBI	INM:SMES	-0.287411	14.1596	-1.59983	0.12788	0.476047	-4.69786
Q15843	NEDD8	INM:SMES	0.293756	15.0593	1.59654	0.128613	0.477677	-4.70225
P22392	NME2	INM:SMES	-0.235985	13.6722	-1.59513	0.12893	0.477677	-4.70414
P53999	SUB1	INM:SMES	-0.26069	13.3188	-1.59492	0.128977	0.477677	-4.70442
Q15084	PDIA6	INM:SMES	0.303037	13.301	1.59333	0.129333	0.478179	-4.70653
Q03001	DST	INM:SMES	0.405778	15.1043	1.59146	0.129755	0.478927	-4.70904
Q6WKZ4	RAB11FIP1	INM:SMES	-0.200513	14.5318	-1.58764	0.130617	0.480421	-4.71412
P0DN76	U2AF1	INM:SMES	-0.375303	11.7916	-1.58592	0.131007	0.480421	-4.7164
Q9BUH6	PAXX	INM:SMES	-0.208896	15.278	-1.58591	0.13101	0.480421	-4.71642
O43175	PHGDH	INM:SMES	0.287433	13.1354	1.58576	0.131044	0.480421	-4.71662
O75223	GGCT	INM:SMES	-0.448418	12.2097	-1.58363	0.131528	0.481385	-4.71945
Q6IQ23	PLEKHA7	INM:SMES	-0.219066	15.0718	-1.57995	0.13237	0.483652	-4.72434
P61769	B2M	INM:SMES	0.287387	12.9011	1.57623	0.133223	0.485951	-4.72925
Q96D96	HVCN1	INM:SMES	-0.524777	17.6579	-1.57214	0.134169	0.486431	-4.73467
P83111	LACTB	INM:SMES	0.509872	12.166	1.57212	0.134174	0.486431	-4.73469
Q9C0K0	BCL11B	INM:SMES	-0.381111	11.7356	-1.57182	0.134243	0.486431	-4.73509
Q32MZ4	LRRFIP1	INM:SMES	-0.230155	12.8254	-1.57146	0.134326	0.486431	-4.73556
Q9Y2Q0	ATP8A1	INM:SMES	0.275771	13.721	1.57083	0.134473	0.486431	-4.7364
Q9BS26	ERP44	INM:SMES	0.349217	12.1484	1.56484	0.135869	0.489708	-4.74429
Q7Z2K6	ERMP1	INM:SMES	0.274418	13.235	1.56464	0.135917	0.489708	-4.74456
P49588	AARS1	INM:SMES	-0.303882	12.1666	-1.56405	0.136055	0.489708	-4.74533
Q8WUM4	PDCD6IP	INM:SMES	0.198133	15.9244	1.56005	0.136995	0.492276	-4.75059
O00291	HIP1	INM:SMES	-0.186005	13.9831	-1.55678	0.137768	0.493772	-4.75488
P78332	RBM6	INM:SMES	-0.594011	13.0247	-1.556	0.137954	0.493772	-4.75591
P67936	TPM4	INM:SMES	-0.452454	13.4895	-1.55466	0.138271	0.493772	-4.75766
Q12913	PTPRJ	INM:SMES	0.2065	13.937	1.55446	0.13832	0.493772	-4.75793
P78344	EIF4G2	INM:SMES	-0.205483	14.1574	-1.55163	0.138992	0.494819	-4.76162
Q5SRE5	NUP188	INM:SMES	-0.186593	17.1718	-1.55131	0.139068	0.494819	-4.76204
O94979	SEC31A	INM:SMES	-0.186828	13.1992	-1.54926	0.13956	0.495264	-4.76473
Q8N201	INTS1	INM:SMES	-0.19583	17.4639	-1.54889	0.139649	0.495264	-4.76521
P19474	TRIM21	INM:SMES	-0.258159	12.9444	-1.54691	0.140124	0.49614	-4.7678
Q9UEY8	ADD3	INM:SMES	-0.248426	14.5457	-1.54444	0.140719	0.497434	-4.77102
O00151	PDLIM1	INM:SMES	-0.364999	12.0995	-1.54078	0.141603	0.499208	-4.77579
Q8NF91	SYNE1	INM:SMES	0.217824	14.7775	1.54047	0.141679	0.499208	-4.7762
Q9UBV2	SEL1L	INM:SMES	-0.382742	15.2901	-1.53843	0.142175	0.500141	-4.77885
P11362	FGFR1	INM:SMES	0.697094	13.8311	1.53743	0.142418	0.500189	-4.78015
Q9BVN2	RUSC1	INM:SMES	-0.52223	11.0596	-1.53274	0.143564	0.503402	-4.78623
Q9NZJ9	NUDT4	INM:SMES	-0.250614	13.1819	-1.53092	0.144012	0.504157	-4.78859
Q8IUR0	TRAPPC5	INM:SMES	0.429061	11.5643	1.52788	0.14476	0.505963	-4.79253
O15350	TP73	INM:SMES	-0.227623	13.3564	-1.52457	0.14558	0.507396	-4.79681
O75449	KATNA1	INM:SMES	-0.244901	14.0431	-1.52306	0.145954	0.507396	-4.79875
Q8TCD5	NT5C	INM:SMES	0.344047	11.2407	1.52291	0.145991	0.507396	-4.79894
Q7Z3J2	VPS35L	INM:SMES	0.188249	13.9209	1.52246	0.146104	0.507396	-4.79953
P14314	PRKCSH	INM:SMES	0.171293	14.7603	1.5183	0.147143	0.509024	-4.80489
Q9H6T3	RPAP3	INM:SMES	0.402398	10.6863	1.51789	0.147245	0.509024	-4.80542
Q9NTX5	ECHDC1	INM:SMES	-0.300799	14.5793	-1.51777	0.147275	0.509024	-4.80557
P05388	RPLP0	INM:SMES	-0.281978	14.4218	-1.51604	0.147709	0.509713	-4.8078
Q9Y618	NCOR2	INM:SMES	-0.321397	14.386	-1.51283	0.148518	0.511693	-4.81193
A5A3E0	POTEF	INM:SMES	0.501393	20.5858	1.51125	0.148917	0.512257	-4.81396
Q16531	DDB1	INM:SMES	-0.252445	13.9777	-1.50926	0.149421	0.513105	-4.81651
P08133	ANXA6	INM:SMES	-0.217726	17.8387	-1.50841	0.149636	0.513105	-4.81759
Q9NX02	NLRP2	INM:SMES	-0.376327	12.8039	-1.50633	0.150166	0.514111	-4.82026
P52565	ARHGDIA	INM:SMES	0.263013	14.2178	1.50512	0.150474	0.514355	-4.82181
P55735	SEC13	INM:SMES	0.202374	12.5868	1.50372	0.150829	0.514762	-4.82359
Q14689	DIP2A	INM:SMES	-0.302624	11.6855	-1.50228	0.151198	0.51521	-4.82543
P62917	RPL8	INM:SMES	0.361761	13.4938	1.49714	0.152521	0.518905	-4.832
P60660	MYL6	INM:SMES	0.466718	16.7966	1.49556	0.152929	0.519481	-4.83401
Q7Z4V5	HDGFL2	INM:SMES	-0.334147	14.8009	-1.4938	0.153385	0.519741	-4.83625
P49368	CCT3	INM:SMES	-0.214877	13.4918	-1.49332	0.153508	0.519741	-4.83686
Q14790	CASP8	INM:SMES	-0.221385	12.2641	-1.49249	0.153723	0.519741	-4.83791
P61803	DAD1	INM:SMES	0.278709	15.9149	1.48897	0.154639	0.522025	-4.84238
Q9UKK9	NUDT5	INM:SMES	-0.22189	13.3168	-1.48551	0.155544	0.52403	-4.84677
P27694	RPA1	INM:SMES	-0.243622	13.2858	-1.48446	0.155821	0.52403	-4.84811
Q13200	PSMD2	INM:SMES	0.245561	12.9812	1.48363	0.156039	0.52403	-4.84915
A8MTJ3	GNAT3	INM:SMES	0.203512	15.8477	1.48093	0.156748	0.52403	-4.85256
Q92734	TFG	INM:SMES	-0.605878	10.3779	-1.48081	0.156781	0.52403	-4.85272
P49454	CENPF	INM:SMES	0.334289	12.0917	1.48078	0.156787	0.52403	-4.85275
Q86WB0	ZC3HC1	INM:SMES	-0.251038	13.4445	-1.48028	0.15692	0.52403	-4.85338
P11169	SLC2A3	INM:SMES	0.217537	15.4082	1.4786	0.157364	0.524707	-4.85551
Q8N9Z2	CCDC71L	INM:SMES	-0.342651	12.3355	-1.47442	0.158473	0.52662	-4.86077
O15427	SLC16A3	INM:SMES	0.181767	14.2518	1.47323	0.15879	0.52662	-4.86227
P69905	HBA1	INM:SMES	-0.249195	16.5143	-1.47316	0.158809	0.52662	-4.86236
P11388	TOP2A	INM:SMES	0.392209	14.5292	1.4728	0.158906	0.52662	-4.86282
Q15027	ACAP1	INM:SMES	0.247839	13.7938	1.46845	0.160069	0.529155	-4.86828
Q96I25	RBM17	INM:SMES	-0.198311	13.9091	-1.46812	0.160158	0.529155	-4.8687
Q96N46	TTC14	INM:SMES	0.280555	13.2585	1.46715	0.160419	0.529213	-4.86992
O15198	SMAD9	INM:SMES	0.224473	14.7498	1.46429	0.161191	0.530952	-4.87351
Q96HW7	INTS4	INM:SMES	-0.276388	12.0861	-1.46259	0.16165	0.53166	-4.87564
P54577	YARS1	INM:SMES	-0.200735	13.792	-1.46135	0.161984	0.531931	-4.87718
P22061	PCMT1	INM:SMES	0.344934	13.4761	1.45988	0.162384	0.531931	-4.87902
Q9UH99	SUN2	INM:SMES	-0.205949	12.9482	-1.45958	0.162466	0.531931	-4.8794
Q9UQ80	PA2G4	INM:SMES	0.326502	13.9814	1.45714	0.163128	0.533295	-4.88244
Q07065	CKAP4	INM:SMES	0.250427	14.4236	1.45617	0.163394	0.53336	-4.88366
Q99570	PIK3R4	INM:SMES	-0.262376	12.033	-1.45491	0.163739	0.533687	-4.88523
Q9BUL8	PDCD10	INM:SMES	-0.318403	13.1228	-1.45202	0.164532	0.535467	-4.88884
P21266	GSTM3	INM:SMES	-0.538385	10.3982	-1.4499	0.165113	0.535965	-4.89147
Q16877	PFKFB4	INM:SMES	-0.190065	14.6539	-1.44932	0.165273	0.535965	-4.89219
Q9UQC2	GAB2	INM:SMES	0.440783	14.3069	1.44877	0.165424	0.535965	-4.89287
P40926	MDH2	INM:SMES	-0.166095	17.4144	-1.44672	0.165991	0.536223	-4.89542
Q9H3H3	C11orf68	INM:SMES	-0.218024	14.0305	-1.44657	0.166032	0.536223	-4.8956
Q8TBE9	NANP	INM:SMES	-0.552326	10.6499	-1.44581	0.166244	0.536223	-4.89656
Q16576	RBBP7	INM:SMES	-0.253527	13.1077	-1.44182	0.167349	0.538637	-4.90149
Q7Z5L2	R3HCC1L	INM:SMES	-0.389233	12.3209	-1.44068	0.167667	0.538637	-4.9029
Q6VY07	PACS1	INM:SMES	-0.322444	12.0136	-1.44002	0.167851	0.538637	-4.90372
P27635	RPL10	INM:SMES	0.259262	14.1069	1.43955	0.167983	0.538637	-4.90431
Q8NI27	THOC2	INM:SMES	-0.282181	12.2169	-1.438	0.168416	0.538652	-4.90622
Q15287	RNPS1	INM:SMES	-0.279539	14.2161	-1.43425	0.169468	0.538652	-4.91085
Q14738	PPP2R5D	INM:SMES	-0.357249	11.0882	-1.43391	0.169566	0.538652	-4.91128
Q0VD83	APOBR	INM:SMES	0.326302	14.4412	1.43371	0.169622	0.538652	-4.91152
P09497	CLTB	INM:SMES	0.308122	13.8232	1.4334	0.169709	0.538652	-4.9119
O96005	CLPTM1	INM:SMES	-0.319021	11.7961	-1.42821	0.171176	0.538652	-4.91829
Q96T60	PNKP	INM:SMES	-0.223914	13.3947	-1.42692	0.171541	0.538652	-4.91987
Q969V3	NCLN	INM:SMES	-0.391855	10.5842	-1.42691	0.171544	0.538652	-4.91989
Q14289	PTK2B	INM:SMES	0.409903	12.6457	1.42676	0.171587	0.538652	-4.92007
O94880	PHF14	INM:SMES	0.440912	12.8819	1.42676	0.171588	0.538652	-4.92008
Q15102	PAFAH1B3	INM:SMES	-0.422794	10.188	-1.42664	0.171621	0.538652	-4.92022
Q9NZT1	CALML5	INM:SMES	0.751374	8.9948	1.42654	0.17165	0.538652	-4.92035
P62873	GNB1	INM:SMES	0.313208	15.6877	1.42582	0.171855	0.538652	-4.92123
P05023	ATP1A1	INM:SMES	-0.180318	13.8976	-1.42503	0.172078	0.538652	-4.92219
Q14141	SEPTIN6	INM:SMES	0.482406	10.7692	1.42389	0.172405	0.538652	-4.9236
Q53EU6	GPAT3	INM:SMES	0.33143	12.6406	1.42377	0.172437	0.538652	-4.92374
Q9H845	ACAD9	INM:SMES	-0.274953	12.6702	-1.4232	0.172602	0.538652	-4.92445
Q96A33	CCDC47	INM:SMES	-0.538003	14.1591	-1.42303	0.172649	0.538652	-4.92465
P62701	RPS4X	INM:SMES	0.303721	15.9898	1.42287	0.172696	0.538652	-4.92485
Q86YF9	DZIP1	INM:SMES	0.589509	16.1453	1.42113	0.173193	0.53943	-4.92698
P12259	F5	INM:SMES	-0.282092	13.1346	-1.41965	0.173617	0.539494	-4.92879
P52630	STAT2	INM:SMES	-0.245039	12.9278	-1.41762	0.1742	0.539494	-4.93127
P62841	RPS15	INM:SMES	0.269115	11.5147	1.41748	0.174239	0.539494	-4.93144
Q6P2E9	EDC4	INM:SMES	-0.199725	13.3344	-1.41743	0.174255	0.539494	-4.93151
C4AMC7		INM:SMES	-0.243178	12.3736	-1.41662	0.174487	0.539494	-4.93249
P19784	CSNK2A2	INM:SMES	0.319164	12.4327	1.41545	0.174826	0.539494	-4.93393
P60866	RPS20	INM:SMES	-0.331805	11.0034	-1.41458	0.175077	0.539494	-4.93499
P02810	PRH1	INM:SMES	0.615196	10.7271	1.41415	0.175199	0.539494	-4.93551
P11177	PDHB	INM:SMES	-0.209951	16.1026	-1.41224	0.175752	0.540431	-4.93783
Q8NBS9	TXNDC5	INM:SMES	-0.17787	13.793	-1.41109	0.176088	0.540674	-4.93925
O14950	MYL12A	INM:SMES	-0.286556	17.3874	-1.41026	0.176328	0.540674	-4.94026
P40429	RPL13A	INM:SMES	-0.438351	14.8255	-1.40711	0.177245	0.54223	-4.94409
Q9NZT2	OGFR	INM:SMES	-0.175915	13.259	-1.4068	0.177335	0.54223	-4.94446
Q9BXS5	AP1M1	INM:SMES	-0.347215	11.6993	-1.40307	0.178427	0.544129	-4.94899
P63104	YWHAZ	INM:SMES	-0.276521	18.1912	-1.40297	0.178456	0.544129	-4.94911
P49411	TUFM	INM:SMES	0.217944	15.5399	1.39921	0.179563	0.546675	-4.95367
Q96I59	NARS2	INM:SMES	-0.536545	10.3212	-1.39842	0.179794	0.546675	-4.95462
P30040	ERP29	INM:SMES	0.20284	14.3925	1.39486	0.180848	0.548244	-4.95892
P68363	TUBA1B	INM:SMES	0.491423	15.8544	1.39392	0.181126	0.548244	-4.96005
Q9NW15	ANO10	INM:SMES	-0.215147	13.3591	-1.39264	0.181507	0.548244	-4.9616
P07737	PFN1	INM:SMES	0.365896	15.5548	1.39224	0.181627	0.548244	-4.96208
Q8IUI8	CRLF3	INM:SMES	0.509231	13.4786	1.39145	0.181863	0.548244	-4.96304
P62851	RPS25	INM:SMES	0.342357	14.7853	1.39047	0.182152	0.548244	-4.96421
Q96S97	MYADM	INM:SMES	0.172067	16.1961	1.38937	0.182482	0.548244	-4.96554
P07948	LYN	INM:SMES	-0.158856	16.5082	-1.38757	0.183021	0.548244	-4.96771
P60174	TPI1	INM:SMES	0.352719	14.3102	1.38707	0.18317	0.548244	-4.96831
Q8NHU6	TDRD7	INM:SMES	-0.323252	11.182	-1.38659	0.183313	0.548244	-4.96888
Q9P107	GMIP	INM:SMES	-0.24836	13.1947	-1.38659	0.183314	0.548244	-4.96888
Q9HD89	RETN	INM:SMES	0.370981	13.8193	1.38651	0.183337	0.548244	-4.96897
O00116	AGPS	INM:SMES	-0.213319	14.1889	-1.38536	0.183683	0.548525	-4.97036
P32119	PRDX2	INM:SMES	-0.398874	12.8155	-1.38319	0.184336	0.548599	-4.97297
Q9Y5X3	SNX5	INM:SMES	0.204554	12.8891	1.38314	0.184352	0.548599	-4.97303
P57737	CORO7	INM:SMES	0.168169	15.8092	1.38076	0.185068	0.548599	-4.97587
P78356	PIP4K2B	INM:SMES	-0.365255	12.6564	-1.38014	0.185256	0.548599	-4.97662
P09913	IFIT2	INM:SMES	-0.393716	12.6119	-1.37889	0.185634	0.548599	-4.97811
P50213	IDH3A	INM:SMES	0.467275	11.8967	1.37797	0.185913	0.548599	-4.97922
Q13177	PAK2	INM:SMES	0.200336	13.5108	1.37779	0.185968	0.548599	-4.97943
Q14554	PDIA5	INM:SMES	-0.211334	12.7794	-1.37729	0.18612	0.548599	-4.98003
P62266	RPS23	INM:SMES	0.248407	13.9963	1.37613	0.186472	0.548599	-4.98141
Q9P2K8	EIF2AK4	INM:SMES	0.425064	11.6253	1.37597	0.186519	0.548599	-4.9816
O00750	PIK3C2B	INM:SMES	-0.292398	15.8558	-1.37545	0.18668	0.548599	-4.98223
Q86UY8	NT5DC3	INM:SMES	0.565279	12.254	1.37526	0.186736	0.548599	-4.98245
O94874	UFL1	INM:SMES	-0.254507	12.9133	-1.37304	0.187414	0.549755	-4.98511
Q8WVY7	UBLCP1	INM:SMES	-0.163661	13.3635	-1.37231	0.187635	0.549755	-4.98597
Q96IX5	ATP5MK	INM:SMES	0.314809	12.9358	1.36791	0.188985	0.552965	-4.99121
Q7Z3U7	MON2	INM:SMES	-0.217788	11.5017	-1.36501	0.189875	0.554484	-4.99465
P11678	EPX	INM:SMES	0.247838	17.114	1.36456	0.190014	0.554484	-4.99519
P11586	MTHFD1	INM:SMES	-0.204958	15.9162	-1.36365	0.190296	0.554562	-4.99627
Q99986	VRK1	INM:SMES	0.534172	12.511	1.35828	0.191961	0.558666	-5.00263
Q9HC35	EML4	INM:SMES	-0.254117	12.6296	-1.35506	0.192964	0.558918	-5.00643
P62241	RPS8	INM:SMES	-0.260501	13.3156	-1.35453	0.193132	0.558918	-5.00706
Q96F15	GIMAP5	INM:SMES	0.305973	13.0065	1.35432	0.193197	0.558918	-5.00731
Q9UNF0	PACSIN2	INM:SMES	-0.17778	17.0818	-1.35388	0.193333	0.558918	-5.00782
P52209	PGD	INM:SMES	-0.251288	17.9022	-1.35388	0.193333	0.558918	-5.00782
Q96H20	SNF8	INM:SMES	-0.28165	11.4914	-1.35183	0.193978	0.559447	-5.01024
Q8IU60	DCP2	INM:SMES	-0.343554	11.3225	-1.35023	0.194479	0.559447	-5.01212
P59535	TAS2R40	INM:SMES	0.305145	14.4027	1.35007	0.194529	0.559447	-5.01231
P48047	ATP5PO	INM:SMES	0.218025	14.1081	1.35002	0.194546	0.559447	-5.01237
P54289	CACNA2D1	INM:SMES	-0.334038	11.1176	-1.34681	0.195555	0.561608	-5.01614
Q9Y383	LUC7L2	INM:SMES	-0.526814	10.1842	-1.34593	0.195836	0.561671	-5.01718
Q8IYB3	SRRM1	INM:SMES	-0.208355	12.3282	-1.34308	0.196737	0.563513	-5.02052
P24928	POLR2A	INM:SMES	0.18527	13.0753	1.34047	0.197566	0.563732	-5.02357
O60832	DKC1	INM:SMES	0.339944	12.4536	1.33982	0.197775	0.563732	-5.02434
O95563	MPC2	INM:SMES	-0.398143	12.0476	-1.33939	0.197909	0.563732	-5.02483
Q14696	MESD	INM:SMES	0.219074	12.705	1.3384	0.198225	0.563732	-5.02599
P21281	ATP6V1B2	INM:SMES	0.497745	14.6628	1.33806	0.198335	0.563732	-5.02639
Q9H0U4	RAB1B	INM:SMES	-0.261382	14.7914	-1.33731	0.198575	0.563732	-5.02727
P14923	JUP	INM:SMES	-0.453602	12.0365	-1.33714	0.198629	0.563732	-5.02747
Q9H7M9	VSIR	INM:SMES	0.256215	12.4022	1.33351	0.199793	0.565432	-5.0317
P59998	ARPC4	INM:SMES	0.430038	15.6213	1.3317	0.200374	0.565432	-5.03381
Q93084	ATP2A3	INM:SMES	-0.177667	17.3291	-1.33036	0.200807	0.565432	-5.03537
Q567U6	CCDC93	INM:SMES	-0.197634	13.1808	-1.3301	0.200889	0.565432	-5.03567
Q8WUH2	TGFBRAP1	INM:SMES	0.249434	12.3649	1.32902	0.20124	0.565432	-5.03693
P46777	RPL5	INM:SMES	-0.184152	15.181	-1.3283	0.201471	0.565432	-5.03776
O60762	DPM1	INM:SMES	-0.22546	12.9137	-1.32804	0.201555	0.565432	-5.03806
P09382	LGALS1	INM:SMES	0.322753	14.2608	1.32767	0.201675	0.565432	-5.03849
Q6BDS2	BLTP3A	INM:SMES	0.187373	18.2771	1.32734	0.201781	0.565432	-5.03887
P00558	PGK1	INM:SMES	-0.199066	13.7569	-1.32641	0.202083	0.565432	-5.03996
Q7LBC6	KDM3B	INM:SMES	-0.315971	12.6044	-1.32639	0.202088	0.565432	-5.03998
P20138	CD33	INM:SMES	0.317292	12.8541	1.32329	0.203097	0.566863	-5.04358
Q04760	GLO1	INM:SMES	-0.229228	12.5784	-1.32281	0.203253	0.566863	-5.04413
Q63HN8	RNF213	INM:SMES	0.14331	13.448	1.32212	0.203477	0.566863	-5.04493
P25774	CTSS	INM:SMES	-0.243748	11.812	-1.32115	0.203795	0.566863	-5.04605
Q6UXV4	APOOL	INM:SMES	0.234157	12.5411	1.32081	0.203904	0.566863	-5.04644
Q99714	HSD17B10	INM:SMES	-0.523199	12.0981	-1.31791	0.204854	0.568156	-5.0498
Q96QT6	PHF12	INM:SMES	-0.205795	12.0619	-1.31779	0.204892	0.568156	-5.04993
Q9NZ32	ACTR10	INM:SMES	0.185048	12.973	1.31621	0.20541	0.568867	-5.05175
Q15631	TSN	INM:SMES	-0.180518	13.6173	-1.31513	0.205766	0.56913	-5.053
Q9P289	STK26	INM:SMES	-0.195907	14.2199	-1.31361	0.206267	0.569225	-5.05475
Q16563	SYPL1	INM:SMES	0.376617	12.5876	1.31343	0.206324	0.569225	-5.05495
P62495	ETF1	INM:SMES	-0.18445	15.319	-1.31242	0.206658	0.569423	-5.05612
P21796	VDAC1	INM:SMES	0.231823	12.4466	1.31048	0.207298	0.569443	-5.05835
Q05086	UBE3A	INM:SMES	-0.306711	11.7358	-1.31022	0.207386	0.569443	-5.05865
Q8TBP0	TBC1D16	INM:SMES	-0.261226	13.3689	-1.3088	0.207854	0.569443	-5.06028
O60271	SPAG9	INM:SMES	-0.202746	11.9188	-1.30791	0.20815	0.569443	-5.0613
Q8WU79	SMAP2	INM:SMES	-0.183235	13.9986	-1.30771	0.208216	0.569443	-5.06153
Q9Y6D9	MAD1L1	INM:SMES	0.269686	13.3515	1.30706	0.208431	0.569443	-5.06227
P05771	PRKCB	INM:SMES	0.203487	14.8008	1.30603	0.208775	0.569443	-5.06346
Q13501	SQSTM1	INM:SMES	-0.337356	12.053	-1.30535	0.209003	0.569443	-5.06424
P10155	RO60	INM:SMES	-0.293624	13.3183	-1.30453	0.209276	0.569443	-5.06518
P46019	PHKA2	INM:SMES	-0.179438	14.3778	-1.30377	0.209527	0.569443	-5.06604
P06733	ENO1	INM:SMES	0.212139	15.5978	1.30304	0.209772	0.569443	-5.06688
O95299	NDUFA10	INM:SMES	0.176451	13.8577	1.30293	0.209809	0.569443	-5.06701
Q969Q4	ARL11	INM:SMES	0.214155	12.9039	1.30202	0.210112	0.569556	-5.06805
Q9UJZ1	STOML2	INM:SMES	-0.237554	14.5318	-1.30065	0.21057	0.570086	-5.06961
Q9P2P1	NYNRIN	INM:SMES	-0.281769	12.0351	-1.29862	0.21125	0.570225	-5.07193
Q05655	PRKCD	INM:SMES	-0.145159	15.8812	-1.29842	0.211318	0.570225	-5.07216
Q6YN16	HSDL2	INM:SMES	0.269089	14.0148	1.29815	0.211408	0.570225	-5.07246
Q9Y484	WDR45	INM:SMES	-0.228305	12.2424	-1.29467	0.212581	0.571915	-5.07643
P15144	ANPEP	INM:SMES	0.195056	14.8184	1.29408	0.212778	0.571915	-5.0771
Q13151	HNRNPA0	INM:SMES	-0.525054	12.0687	-1.29378	0.21288	0.571915	-5.07744
O75165	DNAJC13	INM:SMES	0.202095	13.7552	1.29317	0.213087	0.571915	-5.07814
Q9HBH0	RHOF	INM:SMES	0.339297	13.0001	1.29126	0.213732	0.572939	-5.0803
A6NDG6	PGP	INM:SMES	-0.22076	12.1442	-1.28741	0.215042	0.574307	-5.08468
Q14789	GOLGB1	INM:SMES	0.572964	12.2373	1.28707	0.215156	0.574307	-5.08506
P49189	ALDH9A1	INM:SMES	-0.371562	11.4677	-1.28678	0.215254	0.574307	-5.08538
Q92614	MYO18A	INM:SMES	-0.158883	14.6255	-1.28665	0.215299	0.574307	-5.08553
Q7Z392	TRAPPC11	INM:SMES	-0.32066	11.3534	-1.28434	0.216087	0.575701	-5.08814
Q9Y2Q3	GSTK1	INM:SMES	-0.292985	15.7435	-1.28235	0.21677	0.576814	-5.0904
Q13724	MOGS	INM:SMES	0.167495	13.9287	1.2796	0.217712	0.578613	-5.0935
Q96PU8	QKI	INM:SMES	-0.189449	12.639	-1.2757	0.219055	0.581473	-5.09788
Q9H9A5	CNOT10	INM:SMES	-0.255482	13.684	-1.27306	0.219969	0.583187	-5.10085
P54136	RARS1	INM:SMES	0.155373	13.691	1.27228	0.220242	0.583198	-5.10174
Q3YEC7	RABL6	INM:SMES	0.399441	12.0096	1.27087	0.220728	0.583775	-5.10331
O14980	XPO1	INM:SMES	0.154405	13.201	1.2687	0.221486	0.584969	-5.10574
Q92598	HSPH1	INM:SMES	-0.248718	16.6454	-1.26774	0.221818	0.584969	-5.10681
P0CG12		INM:SMES	-0.143206	14.0946	-1.26726	0.221987	0.584969	-5.10735
Q9C0C9	UBE2O	INM:SMES	-0.316613	13.0569	-1.26435	0.223004	0.586656	-5.1106
O14715	RGPD8	INM:SMES	0.262935	12.5486	1.26389	0.223167	0.586656	-5.11112
P61978	HNRNPK	INM:SMES	-0.228143	18.4033	-1.26208	0.223801	0.587094	-5.11314
P15498	VAV1	INM:SMES	-0.189474	13.7522	-1.26053	0.224344	0.587094	-5.11486
Q99439	CNN2	INM:SMES	0.396176	12.9897	1.26046	0.22437	0.587094	-5.11494
Q8ND04	SMG8	INM:SMES	-0.238955	12.1906	-1.26028	0.224432	0.587094	-5.11514
Q8N9N7	LRRC57	INM:SMES	-0.144144	14.7639	-1.25848	0.225069	0.587094	-5.11715
P12814	ACTN1	INM:SMES	-0.18242	18.1877	-1.25814	0.225186	0.587094	-5.11752
O43143	DHX15	INM:SMES	0.533817	14.0649	1.25804	0.225224	0.587094	-5.11764
Q99961	SH3GL1	INM:SMES	-0.167932	14.4372	-1.25665	0.225714	0.587668	-5.11918
Q96S66	CLCC1	INM:SMES	-0.199036	12.0787	-1.2542	0.226583	0.587704	-5.1219
A8CG34		INM:SMES	-0.178155	12.6827	-1.25415	0.226598	0.587704	-5.12195
Q16637	SMN1	INM:SMES	0.489826	10.2182	1.25381	0.226718	0.587704	-5.12233
Q9H098	FAM107B	INM:SMES	-0.175018	12.7995	-1.25267	0.227123	0.587704	-5.12359
O43292	GPAA1	INM:SMES	-0.233007	12.895	-1.25248	0.227193	0.587704	-5.12381
Q96Q11	TRNT1	INM:SMES	0.259193	11.5916	1.25204	0.22735	0.587704	-5.1243
Q5JRA6	MIA3	INM:SMES	0.277875	18.7535	1.24854	0.228596	0.589931	-5.12817
Q8N6D5	ANKRD29	INM:SMES	0.310185	13.3028	1.2481	0.228754	0.589931	-5.12865
Q6PIU2	NCEH1	INM:SMES	-0.455355	11.1189	-1.24725	0.229055	0.590007	-5.12958
P61313	RPL15	INM:SMES	0.373223	13.619	1.24516	0.229805	0.591238	-5.13189
P63244	RACK1	INM:SMES	0.459893	13.6544	1.24408	0.230193	0.591537	-5.13309
P23743	DGKA	INM:SMES	-0.155733	15.0105	-1.2421	0.230905	0.592666	-5.13527
P08567	PLEK	INM:SMES	-0.180452	14.0503	-1.24128	0.2312	0.592723	-5.13617
Q9NX76	CMTM6	INM:SMES	0.368125	11.0997	1.24017	0.231599	0.593046	-5.13738
Q9Y6E0	STK24	INM:SMES	-0.215148	14.306	-1.23759	0.23253	0.594117	-5.14021
P55145	MANF	INM:SMES	-0.185894	13.0086	-1.2362	0.233036	0.594117	-5.14175
P23526	AHCY	INM:SMES	-0.17353	15.5305	-1.23591	0.23314	0.594117	-5.14206
P08240	SRPRA	INM:SMES	0.182752	12.4063	1.23481	0.23354	0.594117	-5.14327
Q8NF37	LPCAT1	INM:SMES	0.160696	14.9563	1.23381	0.233902	0.594117	-5.14436
Q9UNZ2	NSFL1C	INM:SMES	0.208971	12.8782	1.23305	0.23418	0.594117	-5.14519
Q99717	SMAD5	INM:SMES	-0.354753	9.7048	-1.23297	0.234208	0.594117	-5.14528
P36957	DLST	INM:SMES	-0.166483	14.6681	-1.23272	0.234298	0.594117	-5.14555
Q8TBP5	FAM174A	INM:SMES	-0.450518	9.44317	-1.23223	0.234477	0.594117	-5.14609
Q6P3S1	DENND1B	INM:SMES	-0.189995	13.8713	-1.22862	0.235795	0.596762	-5.15003
P46063	RECQL	INM:SMES	-0.201589	13.3363	-1.2265	0.236571	0.598031	-5.15234
P55795	HNRNPH2	INM:SMES	0.315006	12.1146	1.22487	0.237168	0.598084	-5.15411
P51991	HNRNPA3	INM:SMES	0.143458	14.1784	1.22443	0.237329	0.598084	-5.15459
Q99447	PCYT2	INM:SMES	-0.376484	12.9637	-1.22346	0.237686	0.598084	-5.15564
Q12756	KIF1A	INM:SMES	-0.183348	12.6198	-1.22344	0.237693	0.598084	-5.15566
Q15208	STK38	INM:SMES	-0.177589	15.0004	-1.2211	0.238558	0.599566	-5.15821
P56192	MARS1	INM:SMES	0.237311	12.1278	1.21895	0.239352	0.600869	-5.16054
Q16181	SEPTIN7	INM:SMES	-0.151712	15.0518	-1.21796	0.239717	0.601089	-5.16161
P14618	PKM	INM:SMES	0.254516	18.5913	1.21526	0.240718	0.601317	-5.16453
P61160	ACTR2	INM:SMES	-0.190839	17.6088	-1.21485	0.24087	0.601317	-5.16497
Q6I9Y2	THOC7	INM:SMES	-0.317091	11.8154	-1.21432	0.241068	0.601317	-5.16554
Q14160	SCRIB	INM:SMES	-0.281243	12.3297	-1.21424	0.241098	0.601317	-5.16563
Q96DB5	RMDN1	INM:SMES	-0.18206	13.1782	-1.21374	0.241286	0.601317	-5.16618
O43166	SIPA1L1	INM:SMES	-0.34892	12.7625	-1.21294	0.241581	0.601317	-5.16703
O43847	NRDC	INM:SMES	0.197832	12.3806	1.21214	0.241882	0.601317	-5.1679
Q96AA3	RFT1	INM:SMES	0.246088	14.5625	1.21158	0.242089	0.601317	-5.1685
Q9ULD4	BRPF3	INM:SMES	-0.29112	11.0626	-1.21052	0.242485	0.601317	-5.16964
Q15029	EFTUD2	INM:SMES	0.161202	13.0325	1.20994	0.242703	0.601317	-5.17027
Q02218	OGDH	INM:SMES	0.294248	15.072	1.20919	0.242981	0.601317	-5.17107
P78417	GSTO1	INM:SMES	-0.126662	17.1414	-1.20881	0.243127	0.601317	-5.17149
P62714	PPP2CB	INM:SMES	0.370773	11.2493	1.20736	0.243668	0.601971	-5.17304
P61020	RAB5B	INM:SMES	0.261267	14.2198	1.20531	0.24444	0.60259	-5.17525
P45954	ACADSB	INM:SMES	-0.331595	10.2136	-1.2041	0.244892	0.60259	-5.17654
Q9UET6	FTSJ1	INM:SMES	0.431302	18.33	1.20361	0.245077	0.60259	-5.17707
Q9NWB6	ARGLU1	INM:SMES	-0.459773	13.7184	-1.20222	0.245602	0.60259	-5.17856
Q9UL46	PSME2	INM:SMES	-0.171986	15.162	-1.20194	0.245708	0.60259	-5.17886
P47756	CAPZB	INM:SMES	-0.164692	16.8247	-1.20174	0.245784	0.60259	-5.17907
Q2KHT3	CLEC16A	INM:SMES	0.209857	15.5907	1.19968	0.246561	0.60259	-5.18127
Q6NYC8	PPP1R18	INM:SMES	-0.196051	13.0777	-1.19959	0.246597	0.60259	-5.18137
Q9Y490	TLN1	INM:SMES	0.156051	16.7489	1.1982	0.247121	0.60259	-5.18285
P13489	RNH1	INM:SMES	-0.1933	14.1971	-1.19811	0.247156	0.60259	-5.18295
Q658P3	STEAP3	INM:SMES	-0.230161	13.1123	-1.19796	0.247215	0.60259	-5.18312
P06702	S100A9	INM:SMES	0.222915	16.2819	1.19788	0.247245	0.60259	-5.1832
Q8WUW1	BRK1	INM:SMES	0.252106	13.0512	1.19546	0.248163	0.603569	-5.18578
P50502	ST13	INM:SMES	0.379928	13.3722	1.19536	0.248202	0.603569	-5.18589
Q99829	CPNE1	INM:SMES	-0.192778	14.6743	-1.19207	0.249456	0.605689	-5.18939
Q92621	NUP205	INM:SMES	0.130953	14.9205	1.19161	0.249631	0.605689	-5.18988
P42126	ECI1	INM:SMES	0.151021	14.2345	1.19053	0.250042	0.605831	-5.19102
O00560	SDCBP	INM:SMES	-0.230384	15.5184	-1.19	0.250247	0.605831	-5.19159
Q8TB03	CXorf38	INM:SMES	0.195201	13.6658	1.18829	0.250902	0.606743	-5.19341
O95347	SMC2	INM:SMES	0.394358	13.5909	1.18674	0.251495	0.607238	-5.19504
P15531	NME1	INM:SMES	-0.280157	12.3007	-1.1863	0.251666	0.607238	-5.19551
Q8IXM2	C17orf49	INM:SMES	0.269164	11.4029	1.18489	0.252209	0.607875	-5.19701
P53634	CTSC	INM:SMES	-0.206726	14.094	-1.18307	0.252908	0.608884	-5.19893
Q96SB4	SRPK1	INM:SMES	-0.176348	13.5565	-1.1808	0.253786	0.610323	-5.20133
O00754	MAN2B1	INM:SMES	-0.225481	12.3176	-1.18006	0.254074	0.61034	-5.20211
P21108	PRPS1L1	INM:SMES	0.412698	11.9099	1.17653	0.255443	0.611433	-5.20582
Q9Y4E8	USP15	INM:SMES	0.352725	12.0529	1.17627	0.255542	0.611433	-5.20609
P55084	HADHB	INM:SMES	-0.177752	16.0927	-1.17549	0.255849	0.611433	-5.20692
P39023	RPL3	INM:SMES	-0.211506	16.8194	-1.17533	0.25591	0.611433	-5.20709
O14976	GAK	INM:SMES	0.332536	12.7557	1.17473	0.256145	0.611433	-5.20772
O14523	C2CD2L	INM:SMES	0.157633	13.0177	1.17454	0.256217	0.611433	-5.20792
A3KMH1	VWA8	INM:SMES	-0.173664	12.6422	-1.17291	0.256852	0.612273	-5.20962
O15511	ARPC5	INM:SMES	0.318404	14.6425	1.17059	0.257759	0.612273	-5.21206
O00161	SNAP23	INM:SMES	-0.220788	12.7611	-1.17052	0.257788	0.612273	-5.21213
P63165	SUMO1	INM:SMES	0.462258	12.2859	1.16984	0.258054	0.612273	-5.21285
Q9Y5X1	SNX9	INM:SMES	-0.201301	12.6872	-1.16966	0.258124	0.612273	-5.21303
P48444	ARCN1	INM:SMES	-0.264795	11.669	-1.16892	0.258413	0.612273	-5.2138
Q9Y2I7	PIKFYVE	INM:SMES	0.258434	12.9576	1.16822	0.258691	0.612273	-5.21454
Q9UBV8	PEF1	INM:SMES	0.176919	14.3331	1.16788	0.258822	0.612273	-5.21489
Q7Z739	YTHDF3	INM:SMES	-0.197282	12.3569	-1.16666	0.259303	0.612743	-5.21617
P15586	GNS	INM:SMES	0.14851	14.8913	1.16401	0.260344	0.614536	-5.21893
O75676	RPS6KA4	INM:SMES	0.336154	11.6759	1.16212	0.261093	0.615637	-5.22091
Q9UPQ9	TNRC6B	INM:SMES	0.254096	10.4248	1.16038	0.26178	0.616359	-5.22271
Q9UJ70	NAGK	INM:SMES	-0.28693	15.2318	-1.15982	0.262003	0.616359	-5.2233
Q9BTC0	DIDO1	INM:SMES	-0.183199	11.8344	-1.15919	0.26225	0.616359	-5.22395
Q9BZE9	ASPSCR1	INM:SMES	-0.185429	12.8363	-1.15739	0.262966	0.617375	-5.22582
Q99627	COPS8	INM:SMES	-0.175619	12.5762	-1.15579	0.263602	0.618163	-5.22748
P27701	CD82	INM:SMES	0.270002	11.8379	1.15477	0.264009	0.618163	-5.22853
Q96BY6	DOCK10	INM:SMES	-0.182644	13.2493	-1.1544	0.264155	0.618163	-5.22891
P61201	COPS2	INM:SMES	0.20364	12.6592	1.15192	0.265145	0.619252	-5.23148
P04179	SOD2	INM:SMES	0.156165	16.6011	1.15181	0.26519	0.619252	-5.23159
O15145	ARPC3	INM:SMES	0.142233	13.9395	1.151	0.265516	0.61934	-5.23244
Q4KMQ2	ANO6	INM:SMES	-0.278234	12.7401	-1.15029	0.265798	0.61934	-5.23316
O00233	PSMD9	INM:SMES	-0.191566	13.3927	-1.1481	0.266676	0.619685	-5.23542
P42226	STAT6	INM:SMES	0.331133	12.5168	1.14735	0.266977	0.619685	-5.23619
Q14166	TTLL12	INM:SMES	-0.149707	14.5377	-1.14711	0.267076	0.619685	-5.23645
P35237	SERPINB6	INM:SMES	-0.215986	12.045	-1.14679	0.267204	0.619685	-5.23677
Q8IZP2		INM:SMES	-0.245962	13.3256	-1.14637	0.267371	0.619685	-5.2372
Q5TBA9	FRY	INM:SMES	0.277113	12.7351	1.14126	0.269435	0.623804	-5.24245
Q15386	UBE3C	INM:SMES	-0.195869	13.1851	-1.14048	0.269751	0.623872	-5.24325
Q9H0F6	SHARPIN	INM:SMES	-0.293829	11.9437	-1.13876	0.270449	0.624182	-5.24502
P50416	CPT1A	INM:SMES	0.239792	12.1977	1.13873	0.27046	0.624182	-5.24504
Q9NVZ3	NECAP2	INM:SMES	0.181312	11.9636	1.13801	0.270754	0.624198	-5.24578
P16401	H1-5	INM:SMES	0.643865	15.0189	1.137	0.271162	0.624477	-5.24681
Q9UKX3	MYH13	INM:SMES	-0.190408	14.7397	-1.13596	0.271587	0.624794	-5.24788
Q8TEM1	NUP210	INM:SMES	-0.171886	13.7672	-1.13375	0.272489	0.626205	-5.25014
P35659	DEK	INM:SMES	-0.219616	14.9864	-1.13193	0.273231	0.627249	-5.25199
P61923	COPZ1	INM:SMES	0.273382	12.462	1.13084	0.273676	0.627608	-5.25309
P01034	CST3	INM:SMES	-0.282679	12.0357	-1.12953	0.274213	0.628176	-5.25443
P04080	CSTB	INM:SMES	-0.246116	13.2282	-1.12842	0.274667	0.628554	-5.25555
P09972	ALDOC	INM:SMES	0.167007	13.3132	1.12749	0.275051	0.628772	-5.2565
Q15942	ZYX	INM:SMES	-0.150909	17.7386	-1.12674	0.275361	0.628817	-5.25726
Q3LXA3	TKFC	INM:SMES	0.457551	8.82202	1.12536	0.275925	0.629445	-5.25865
Q9P270	SLAIN2	INM:SMES	-0.167598	12.0691	-1.12273	0.277012	0.630754	-5.26132
O00483	NDUFA4	INM:SMES	0.243627	12.579	1.12248	0.277117	0.630754	-5.26158
Q15042	RAB3GAP1	INM:SMES	-0.241504	12.9156	-1.12187	0.277369	0.630754	-5.26219
P08708	RPS17	INM:SMES	-0.245563	12.5857	-1.12109	0.277688	0.630819	-5.26297
P13667	PDIA4	INM:SMES	0.16913	13.9201	1.11918	0.27848	0.631958	-5.2649
P13498	CYBA	INM:SMES	0.235502	17.1165	1.11835	0.278828	0.632087	-5.26575
P61081	UBE2M	INM:SMES	-0.161883	13.1349	-1.11499	0.280223	0.634144	-5.26912
Q53GQ0	HSD17B12	INM:SMES	-0.22653	12.6959	-1.11475	0.280322	0.634144	-5.26936
Q14195	DPYSL3	INM:SMES	0.192139	13.3015	1.11406	0.28061	0.634144	-5.27005
Q4V328	GRIPAP1	INM:SMES	-0.251644	11.581	-1.11137	0.281734	0.634963	-5.27275
P31040	SDHA	INM:SMES	0.257315	12.2991	1.1113	0.281762	0.634963	-5.27282
P08962	CD63	INM:SMES	0.164727	16.0864	1.1111	0.281849	0.634963	-5.27303
O94973	AP2A2	INM:SMES	0.280392	12.3735	1.10945	0.282537	0.635854	-5.27467
Q92878	RAD50	INM:SMES	-0.171342	12.8209	-1.10751	0.283355	0.637036	-5.27662
Q8WY22	BRI3BP	INM:SMES	-0.183455	13.9131	-1.1064	0.283818	0.637418	-5.27772
P08473	MME	INM:SMES	-0.142572	16.44	-1.10059	0.286272	0.642265	-5.28352
O15211	RGL2	INM:SMES	-0.302335	11.076	-1.09902	0.286936	0.643092	-5.28507
O75351	VPS4B	INM:SMES	0.303885	11.2846	1.09818	0.287295	0.643232	-5.28591
Q8NDD1	C1orf131	INM:SMES	0.237615	13.0268	1.09695	0.287816	0.643736	-5.28713
P62424	RPL7A	INM:SMES	-0.242414	15.1605	-1.09567	0.288358	0.644286	-5.28839
Q53TN4	CYBRD1	INM:SMES	-0.337374	15.7845	-1.09162	0.290086	0.646615	-5.2924
Q12873	CHD3	INM:SMES	-0.216256	14.7179	-1.08979	0.290871	0.646615	-5.29421
P36222	CHI3L1	INM:SMES	0.185813	13.5087	1.08704	0.292051	0.646615	-5.29692
Q4FZB7	KMT5B	INM:SMES	-0.379802	17.2886	-1.08701	0.292061	0.646615	-5.29694
P0DME0	SETSIP	INM:SMES	-0.24968	12.6122	-1.0869	0.292109	0.646615	-5.29705
A2RUS2	DENND3	INM:SMES	0.298884	12.1655	1.08542	0.292746	0.646615	-5.29851
Q86WV6	STING1	INM:SMES	0.31239	15.0724	1.0853	0.292796	0.646615	-5.29862
Q6PI48	DARS2	INM:SMES	0.200838	11.6441	1.08507	0.292898	0.646615	-5.29885
P62306	SNRPF	INM:SMES	-0.424339	14.586	-1.08455	0.293122	0.646615	-5.29936
P05362	ICAM1	INM:SMES	0.238599	12.422	1.08415	0.293292	0.646615	-5.29975
P16284	PECAM1	INM:SMES	0.184439	14.6362	1.0841	0.293314	0.646615	-5.2998
O15347	HMGB3	INM:SMES	-0.169611	16.806	-1.08324	0.293684	0.646615	-5.30064
P40939	HADHA	INM:SMES	0.187614	14.0841	1.08304	0.29377	0.646615	-5.30084
P46013	MKI67	INM:SMES	-0.351526	11.1637	-1.08277	0.293887	0.646615	-5.3011
P16615	ATP2A2	INM:SMES	-0.174113	15.0737	-1.08088	0.294704	0.646615	-5.30296
O14579	COPE	INM:SMES	-0.302504	12.7849	-1.08079	0.294743	0.646615	-5.30304
Q12950	FOXD4	INM:SMES	0.256025	12.7103	1.08058	0.294833	0.646615	-5.30325
O75334	PPFIA2	INM:SMES	0.29264	14.4882	1.08024	0.294983	0.646615	-5.30359
Q9UPU5	USP24	INM:SMES	-0.138652	12.6614	-1.08008	0.295052	0.646615	-5.30374
Q13535	ATR	INM:SMES	-0.194347	17.2557	-1.07937	0.295358	0.646635	-5.30443
O95490	ADGRL2	INM:SMES	-0.146345	16.352	-1.07704	0.296367	0.647434	-5.30671
P21283	ATP6V1C1	INM:SMES	0.18408	13.4596	1.07666	0.296534	0.647434	-5.30708
Q6IS14	EIF5AL1	INM:SMES	-0.451743	13.3969	-1.0764	0.296645	0.647434	-5.30733
Q92973	TNPO1	INM:SMES	0.112323	15.0449	1.07533	0.297112	0.647434	-5.30838
P63279	UBE2I	INM:SMES	-0.255341	13.9236	-1.0751	0.297212	0.647434	-5.3086
O14548	COX7A2L	INM:SMES	-0.230204	12.8612	-1.07382	0.297769	0.647997	-5.30985
P61019	RAB2A	INM:SMES	0.210521	12.9918	1.07227	0.298446	0.648726	-5.31136
P61326	MAGOH	INM:SMES	-0.238997	14.7947	-1.07139	0.298829	0.648726	-5.31221
O75531	BANF1	INM:SMES	0.510752	13.2123	1.07069	0.299133	0.648726	-5.31289
Q6NZI2	CAVIN1	INM:SMES	-0.221199	11.7335	-1.07032	0.299297	0.648726	-5.31325
P04439	HLA-A	INM:SMES	-0.304189	12.4385	-1.06959	0.299615	0.648768	-5.31395
Q9Y6D6	ARFGEF1	INM:SMES	-0.203335	12.3681	-1.06397	0.302084	0.653462	-5.3194
O15372	EIF3H	INM:SMES	-0.268008	12.9932	-1.06311	0.302459	0.653625	-5.32022
Q6UWP7	LCLAT1	INM:SMES	0.179916	13.0115	1.06221	0.30286	0.65384	-5.3211
P30044	PRDX5	INM:SMES	0.405711	16.2206	1.05869	0.304412	0.655981	-5.32448
P34932	HSPA4	INM:SMES	-0.237775	12.9203	-1.05838	0.304548	0.655981	-5.32477
Q9NVM9	INTS13	INM:SMES	-0.137371	12.4811	-1.05792	0.304756	0.655981	-5.32522
Q9Y371	SH3GLB1	INM:SMES	-0.116417	13.9055	-1.0565	0.305385	0.656587	-5.32659
Q8N8A2	ANKRD44	INM:SMES	0.283057	13.2085	1.05585	0.305672	0.656587	-5.32721
Q9H078	CLPB	INM:SMES	-0.183891	12.0583	-1.05524	0.305944	0.656587	-5.32779
Q8N5C6	SRBD1	INM:SMES	0.213381	12.6126	1.05372	0.306619	0.656741	-5.32925
Q13232	NME3	INM:SMES	-0.296655	10.8557	-1.05372	0.30662	0.656741	-5.32925
P56134	ATP5MF	INM:SMES	0.366226	10.9528	1.05274	0.307056	0.657026	-5.33019
Q13469	NFATC2	INM:SMES	-0.190213	13.0141	-1.04983	0.308356	0.658717	-5.33297
Q8NBJ7	SUMF2	INM:SMES	0.209939	12.4259	1.04961	0.308451	0.658717	-5.33317
P98160	HSPG2	INM:SMES	0.292766	13.009	1.0483	0.30904	0.659325	-5.33443
O43252	PAPSS1	INM:SMES	0.217672	12.1666	1.04667	0.30977	0.65959	-5.33598
Q9UMX0	UBQLN1	INM:SMES	-0.242564	12.4526	-1.04666	0.30977	0.65959	-5.33598
P10253	GAA	INM:SMES	0.279829	11.9799	1.04546	0.310313	0.660098	-5.33713
Q86YV0	RASAL3	INM:SMES	0.228175	13.055	1.04076	0.312427	0.663738	-5.34159
Q96JM3	CHAMP1	INM:SMES	0.222909	11.0507	1.0403	0.312635	0.663738	-5.34203
O60636	TSPAN2	INM:SMES	-0.336795	15.2639	-1.03944	0.313023	0.663914	-5.34284
O75439	PMPCB	INM:SMES	0.180473	13.4851	1.0382	0.313584	0.663989	-5.34401
Q13613	MTMR1	INM:SMES	-0.169255	12.6881	-1.03801	0.313669	0.663989	-5.34419
P52788	SMS	INM:SMES	-0.191297	12.4066	-1.03405	0.315465	0.66654	-5.34793
O15530	PDPK1	INM:SMES	-0.205862	13.3212	-1.03395	0.315511	0.66654	-5.34802
P26885	FKBP2	INM:SMES	-0.28577	13.9607	-1.0325	0.316168	0.66654	-5.34938
A0AVT1	UBA6	INM:SMES	-0.242454	11.616	-1.03238	0.316221	0.66654	-5.34949
Q92620	DHX38	INM:SMES	0.216568	10.5439	1.03197	0.316407	0.66654	-5.34988
Q15369	ELOC	INM:SMES	0.372887	12.3455	1.03009	0.317265	0.667701	-5.35165
Q96HY6	DDRGK1	INM:SMES	-0.160226	14.007	-1.02808	0.318184	0.668762	-5.35354
Q9Y285	FARSA	INM:SMES	-0.307021	12.0662	-1.02669	0.31882	0.668762	-5.35484
Q8WXG6	MADD	INM:SMES	-0.208545	13.0332	-1.02603	0.319122	0.668762	-5.35546
P56211	ARPP19	INM:SMES	-0.28717	11.8996	-1.02581	0.31922	0.668762	-5.35566
Q9BXL7	CARD11	INM:SMES	0.190101	11.4907	1.02469	0.319734	0.668762	-5.35671
P62995	TRA2B	INM:SMES	-0.144451	16.7777	-1.02404	0.320034	0.668762	-5.35731
Q9BSA9	TMEM175	INM:SMES	0.223537	11.8311	1.02316	0.320437	0.668762	-5.35813
Q14624	ITIH4	INM:SMES	-0.158135	13.9439	-1.0225	0.320741	0.668762	-5.35875
P24666	ACP1	INM:SMES	0.149996	12.4625	1.02221	0.320872	0.668762	-5.35902
P13473	LAMP2	INM:SMES	-0.157477	17.3451	-1.02137	0.321259	0.668762	-5.3598
P06748	NPM1	INM:SMES	0.262	12.7367	1.02078	0.321533	0.668762	-5.36036
Q3KQU3	MAP7D1	INM:SMES	-0.236882	11.4551	-1.02056	0.321633	0.668762	-5.36056
Q9Y5X0	SNX10	INM:SMES	-0.339837	11.5015	-1.02027	0.321769	0.668762	-5.36083
Q9NUJ1	ABHD10	INM:SMES	0.185603	12.7686	1.01621	0.32364	0.67201	-5.3646
O95486	SEC24A	INM:SMES	0.206019	11.9938	1.0147	0.324341	0.672575	-5.366
P24539	ATP5PB	INM:SMES	0.131643	13.5971	1.01429	0.324532	0.672575	-5.36638
P02545	LMNA	INM:SMES	-0.141602	14.0018	-1.01223	0.325485	0.67391	-5.36829
Q6GTX8	LAIR1	INM:SMES	0.15089	12.807	1.01045	0.326311	0.67459	-5.36993
O43747	AP1G1	INM:SMES	0.181017	14.0771	1.01001	0.326518	0.67459	-5.37034
P21333	FLNA	INM:SMES	-0.137423	17.6782	-1.009	0.326987	0.67459	-5.37127
Q96AX1	VPS33A	INM:SMES	-0.149627	13.6229	-1.00886	0.327055	0.67459	-5.3714
Q8NEY8	PPHLN1	INM:SMES	-0.303613	12.1735	-1.00746	0.327704	0.675289	-5.37268
Q01082	SPTBN1	INM:SMES	-0.124292	15.4737	-1.00511	0.328805	0.676915	-5.37485
Q14315	FLNC	INM:SMES	-0.151324	16.9146	-1.00383	0.329404	0.677506	-5.37602
Q9UJU6	DBNL	INM:SMES	0.132675	13.4579	1.00254	0.330008	0.677681	-5.37721
Q96TC7	RMDN3	INM:SMES	0.182875	13.485	1.00232	0.330112	0.677681	-5.37741
P15735	PHKG2	INM:SMES	0.106341	15.3031	1.00052	0.330955	0.678698	-5.37905
P36897	TGFBR1	INM:SMES	-0.246659	12.2944	-0.999507	0.331432	0.678698	-5.37998
Q6UWE0	LRSAM1	INM:SMES	-0.184738	14.3977	-0.99927	0.331544	0.678698	-5.3802
Q8WVR3	TRAPPC14	INM:SMES	-0.187051	12.0932	-0.99491	0.3336	0.682108	-5.38418
Q9Y5B0	CTDP1	INM:SMES	0.183602	13.3694	0.994407	0.333838	0.682108	-5.38463
Q9UKG1	APPL1	INM:SMES	-0.225711	12.4277	-0.992897	0.334552	0.682359	-5.38601
P48382	RFX5	INM:SMES	-0.272311	10.0258	-0.992821	0.334588	0.682359	-5.38608
Q99943	AGPAT1	INM:SMES	0.217748	14.2463	0.990313	0.335777	0.683442	-5.38835
Q9H9H4	VPS37B	INM:SMES	0.260815	15.2296	0.989909	0.335969	0.683442	-5.38872
Q6PGP7	SKIC3	INM:SMES	0.473247	12.703	0.988911	0.336443	0.683442	-5.38962
P62316	SNRPD2	INM:SMES	-0.14292	14.4025	-0.98852	0.336629	0.683442	-5.38998
O14773	TPP1	INM:SMES	0.153931	15.8884	0.98807	0.336843	0.683442	-5.39038
O00267	SUPT5H	INM:SMES	-0.166172	12.2933	-0.987729	0.337006	0.683442	-5.39069
P05455	SSB	INM:SMES	-0.150063	12.838	-0.985839	0.337906	0.684478	-5.3924
Q99460	PSMD1	INM:SMES	0.171026	13.2652	0.985336	0.338146	0.684478	-5.39286
Q6RW13	AGTRAP	INM:SMES	0.197554	13.258	0.984442	0.338572	0.684704	-5.39366
Q9UPN7	PPP6R1	INM:SMES	-0.320859	11.3288	-0.982969	0.339276	0.685408	-5.39499
Q8NEZ2	VPS37A	INM:SMES	0.163232	12.4645	0.981707	0.33988	0.685408	-5.39613
Q9BV40	VAMP8	INM:SMES	0.208413	14.7714	0.981247	0.340101	0.685408	-5.39654
Q9BVC6	TMEM109	INM:SMES	-0.154878	13.2265	-0.980441	0.340487	0.685408	-5.39726
Q8WYP5	AHCTF1	INM:SMES	-0.196359	11.4384	-0.980419	0.340497	0.685408	-5.39728
Q6ZTN6	ANKRD13D	INM:SMES	0.145129	13.0053	0.977842	0.341734	0.687092	-5.3996
P54619	PRKAG1	INM:SMES	-0.115835	13.5468	-0.97736	0.341966	0.687092	-5.40003
Q6ZS81	WDFY4	INM:SMES	-0.158864	12.1074	-0.975621	0.342803	0.687333	-5.40159
P48634	PRRC2A	INM:SMES	-0.169651	12.4898	-0.975322	0.342947	0.687333	-5.40185
Q13905	RAPGEF1	INM:SMES	0.220752	14.8001	0.974887	0.343156	0.687333	-5.40224
Q9Y3F4	STRAP	INM:SMES	-0.21156	11.1691	-0.974485	0.34335	0.687333	-5.4026
P09668	CTSH	INM:SMES	-0.152467	13.652	-0.972751	0.344187	0.688079	-5.40415
O95716	RAB3D	INM:SMES	-0.276185	11.2267	-0.972402	0.344356	0.688079	-5.40446
Q96BI1	SLC22A18	INM:SMES	-0.244447	13.1136	-0.97128	0.344898	0.68853	-5.40546
P30876	POLR2B	INM:SMES	-0.285215	11.621	-0.969433	0.345792	0.689654	-5.40711
Q92530	PSMF1	INM:SMES	0.259012	15.0034	0.968807	0.346096	0.689654	-5.40767
O00507	USP9Y	INM:SMES	0.146211	14.3014	0.967261	0.346846	0.690515	-5.40904
Q13510	ASAH1	INM:SMES	-0.138079	14.8384	-0.966471	0.34723	0.690608	-5.40974
Q96KR1	ZFR	INM:SMES	-0.171186	12.4862	-0.965858	0.347528	0.690608	-5.41028
Q15046	KARS1	INM:SMES	0.10306	14.4865	0.964851	0.348017	0.69095	-5.41118
P24723	PRKCH	INM:SMES	0.255537	13.8803	0.963368	0.34874	0.691753	-5.41249
Q5SR53		INM:SMES	0.304118	13.297	0.961045	0.349873	0.693368	-5.41454
P04844	RPN2	INM:SMES	-0.173526	13.3567	-0.960287	0.350244	0.693471	-5.41521
Q9Y6B7	AP4B1	INM:SMES	-0.168218	14.0001	-0.959274	0.350739	0.693819	-5.41611
Q9Y496	KIF3A	INM:SMES	0.115787	15.5811	0.957706	0.351507	0.694706	-5.41749
P43307	SSR1	INM:SMES	0.257973	12.9498	0.956576	0.352062	0.69517	-5.41848
P62263	RPS14	INM:SMES	0.197892	13.2447	0.955402	0.352638	0.695675	-5.41951
P63151	PPP2R2A	INM:SMES	0.321054	13.9148	0.953847	0.353402	0.695933	-5.42088
P51572	BCAP31	INM:SMES	0.119027	14.3028	0.953309	0.353667	0.695933	-5.42135
P61009	SPCS3	INM:SMES	-0.417657	14.6998	-0.953184	0.353728	0.695933	-5.42146
O43399	TPD52L2	INM:SMES	0.240055	13.8161	0.949778	0.355408	0.69816	-5.42444
Q53S08	RAB6D	INM:SMES	0.225851	13.3915	0.94879	0.355896	0.69816	-5.4253
Q9UBW5	BIN2	INM:SMES	0.217352	13.7309	0.948434	0.356072	0.69816	-5.42561
O95202	LETM1	INM:SMES	0.237011	12.5574	0.947527	0.356521	0.69816	-5.42641
O75608	LYPLA1	INM:SMES	-0.134009	15.0626	-0.947296	0.356635	0.69816	-5.42661
Q7Z5G4	GOLGA7	INM:SMES	-0.154946	15.6456	-0.946291	0.357133	0.69816	-5.42748
P46781	RPS9	INM:SMES	0.271141	15.457	0.944839	0.357852	0.69816	-5.42875
P04843	RPN1	INM:SMES	0.095906	17.5916	0.944825	0.357859	0.69816	-5.42876
O00442	RTCA	INM:SMES	0.251878	11.0307	0.944697	0.357923	0.69816	-5.42887
P06127	CD5	INM:SMES	-0.190388	11.385	-0.943603	0.358466	0.69816	-5.42982
O95336	PGLS	INM:SMES	0.292489	13.0802	0.943465	0.358535	0.69816	-5.42994
P08697	SERPINF2	INM:SMES	-0.191387	14.0867	-0.941529	0.359498	0.69816	-5.43162
P14174	MIF	INM:SMES	0.278159	15.4203	0.941325	0.359599	0.69816	-5.4318
Q5JWF2	GNAS	INM:SMES	0.195757	13.6045	0.941288	0.359617	0.69816	-5.43183
Q92835	INPP5D	INM:SMES	-0.113461	15.3949	-0.940346	0.360087	0.69816	-5.43264
Q9Y4L1	HYOU1	INM:SMES	-0.11897	13.4292	-0.939896	0.360311	0.69816	-5.43303
P53990	IST1	INM:SMES	0.12893	14.0018	0.9394	0.360558	0.69816	-5.43346
Q9H223	EHD4	INM:SMES	0.251935	12.2566	0.9392	0.360658	0.69816	-5.43364
Q5VYK3		INM:SMES	-0.146694	13.9451	-0.93859	0.360962	0.69816	-5.43416
P29590	PML	INM:SMES	0.217242	12.99	0.937862	0.361326	0.698242	-5.43479
O75947	ATP5PD	INM:SMES	-0.199786	14.827	-0.931719	0.364403	0.703563	-5.44008
Q9BXP5	SRRT	INM:SMES	-0.121072	13.8526	-0.929163	0.365689	0.704823	-5.44228
Q9UL36	ZNF236	INM:SMES	0.242998	13.2202	0.927313	0.366621	0.704823	-5.44386
P26640	VARS1	INM:SMES	0.146918	12.6707	0.926764	0.366898	0.704823	-5.44433
Q92499	DDX1	INM:SMES	0.169856	13.1959	0.926637	0.366962	0.704823	-5.44444
P21127	CDK11B	INM:SMES	-0.193018	12.328	-0.926618	0.366972	0.704823	-5.44446
O43865	AHCYL1	INM:SMES	-0.204503	12.6297	-0.92656	0.367001	0.704823	-5.4445
Q9NX40	OCIAD1	INM:SMES	-0.152831	13.3214	-0.925268	0.367654	0.705454	-5.44561
O75306	NDUFS2	INM:SMES	0.326844	13.3289	0.924625	0.367979	0.705455	-5.44616
P55265	ADAR	INM:SMES	0.133221	12.5181	0.923175	0.368712	0.705457	-5.44739
Q8IV50	LYSMD2	INM:SMES	0.169872	12.0816	0.922778	0.368913	0.705457	-5.44773
Q6JQN1	ACAD10	INM:SMES	-0.257022	13.4561	-0.922699	0.368953	0.705457	-5.4478
Q8NB16	MLKL	INM:SMES	0.236346	11.6969	0.920894	0.369869	0.706327	-5.44933
O95782	AP2A1	INM:SMES	-0.175773	13.2426	-0.920323	0.370158	0.706327	-5.44982
Q7Z4W1	DCXR	INM:SMES	-0.11648	15.9099	-0.918837	0.370913	0.706327	-5.45108
Q15417	CNN3	INM:SMES	0.163554	14.8582	0.917826	0.371428	0.706327	-5.45194
P25490	YY1	INM:SMES	-0.18863	13.1496	-0.917529	0.371579	0.706327	-5.45219
Q14247	CTTN	INM:SMES	-0.213105	12.107	-0.917488	0.3716	0.706327	-5.45222
O95674	CDS2	INM:SMES	0.225177	12.2302	0.916922	0.371888	0.706327	-5.4527
P41240	CSK	INM:SMES	-0.346909	12.0291	-0.916033	0.372341	0.706327	-5.45346
Q86YZ3	HRNR	INM:SMES	-0.235446	13.8274	-0.915512	0.372607	0.706327	-5.4539
P35611	ADD1	INM:SMES	-0.12283	15.4451	-0.915103	0.372815	0.706327	-5.45424
Q9Y678	COPG1	INM:SMES	-0.184312	13.1137	-0.914775	0.372982	0.706327	-5.45452
Q99536	VAT1	INM:SMES	-0.15898	19.0935	-0.913057	0.37386	0.706661	-5.45597
O75038	PLCH2	INM:SMES	-0.122772	15.7154	-0.9127	0.374043	0.706661	-5.45627
O43395	PRPF3	INM:SMES	-0.218724	13.4358	-0.911809	0.374498	0.706661	-5.45702
Q04864	REL	INM:SMES	-0.0982002	14.1173	-0.911448	0.374683	0.706661	-5.45733
P26583	HMGB2	INM:SMES	-0.111824	17.2668	-0.911251	0.374784	0.706661	-5.45749
Q9H9P8	L2HGDH	INM:SMES	0.396043	9.72493	0.909971	0.37544	0.707133	-5.45857
Q13033	STRN3	INM:SMES	-0.180013	11.6422	-0.909493	0.375685	0.707133	-5.45897
Q08211	DHX9	INM:SMES	0.138019	13.7368	0.90833	0.376281	0.707643	-5.45995
O95248	SBF1	INM:SMES	-0.216011	11.9541	-0.9071	0.376913	0.708175	-5.46098
O95197	RTN3	INM:SMES	0.332975	11.8582	0.906512	0.377216	0.708175	-5.46147
P49589	CARS1	INM:SMES	-0.201808	12.8923	-0.905525	0.377723	0.708516	-5.4623
Q8NE86	MCU	INM:SMES	0.137102	13.1845	0.904266	0.378372	0.709121	-5.46335
Q2PPJ7	RALGAPA2	INM:SMES	-0.137622	14.0049	-0.903132	0.378956	0.709604	-5.4643
Q96MX0	CMTM3	INM:SMES	0.251702	11.3006	0.898154	0.38153	0.712139	-5.46845
O43567	RNF13	INM:SMES	-0.153691	12.9699	-0.898116	0.38155	0.712139	-5.46848
Q8N5G0	SMIM20	INM:SMES	-0.131114	13.5372	-0.896971	0.382143	0.712139	-5.46943
Q6DD88	ATL3	INM:SMES	-0.132347	14.5491	-0.896587	0.382342	0.712139	-5.46975
Q14C86	GAPVD1	INM:SMES	0.130913	13.1332	0.896374	0.382453	0.712139	-5.46992
P46459	NSF	INM:SMES	0.129287	14.8373	0.896012	0.382641	0.712139	-5.47022
Q15398	DLGAP5	INM:SMES	-0.160922	11.7198	-0.895744	0.38278	0.712139	-5.47045
P55072	VCP	INM:SMES	-0.121878	15.829	-0.895455	0.38293	0.712139	-5.47069
P57721	PCBP3	INM:SMES	0.193455	14.9903	0.894591	0.383379	0.712364	-5.4714
Q9UGP8	SEC63	INM:SMES	0.290447	11.8795	0.89392	0.383728	0.712394	-5.47196
O60763	USO1	INM:SMES	0.155447	13.3021	0.8933	0.384051	0.712394	-5.47247
Q8N3F8	MICALL1	INM:SMES	-0.141854	12.3512	-0.891278	0.385104	0.713483	-5.47414
Q86YB8	ERO1B	INM:SMES	0.121771	14.3944	0.890913	0.385294	0.713483	-5.47444
O14949	UQCRQ	INM:SMES	-0.160525	13.0381	-0.889624	0.385967	0.714121	-5.4755
P20073	ANXA7	INM:SMES	0.133007	13.4813	0.887168	0.387251	0.715887	-5.47752
Q9Y3R5	DOP1B	INM:SMES	0.295171	10.4676	0.886149	0.387784	0.716264	-5.47836
P62269	RPS18	INM:SMES	-0.118044	17.3505	-0.885359	0.388198	0.71642	-5.47901
P37802	TAGLN2	INM:SMES	-0.284224	13.709	-0.883556	0.389144	0.716431	-5.48049
O00308	WWP2	INM:SMES	-0.228415	11.86	-0.883488	0.38918	0.716431	-5.48054
P55061	TMBIM6	INM:SMES	-0.150518	12.7985	-0.883464	0.389192	0.716431	-5.48056
P18085	ARF4	INM:SMES	-0.192569	13.7854	-0.879031	0.391525	0.71987	-5.48418
Q6VN20	RANBP10	INM:SMES	-0.187149	12.4164	-0.878655	0.391723	0.71987	-5.48449
Q07866	KLC1	INM:SMES	-0.116351	13.5174	-0.877482	0.392342	0.719895	-5.48545
P30050	RPL12	INM:SMES	0.263731	15.5339	0.877373	0.392399	0.719895	-5.48553
Q7KYR7	BTN2A1	INM:SMES	0.194054	14.3606	0.876681	0.392765	0.719958	-5.4861
Q6P4A8	PLBD1	INM:SMES	-0.127763	17.0276	-0.874992	0.393658	0.720987	-5.48747
Q15349	RPS6KA2	INM:SMES	0.13849	12.8867	0.872746	0.394847	0.722557	-5.48929
P23396	RPS3	INM:SMES	-0.112255	15.436	-0.871487	0.395515	0.72317	-5.49031
P49790	NUP153	INM:SMES	0.119554	13.6206	0.869711	0.396458	0.723561	-5.49174
P26641	EEF1G	INM:SMES	-0.128989	14.0133	-0.868345	0.397184	0.723561	-5.49284
P62805	H4C9	INM:SMES	0.309776	18.9034	0.868305	0.397206	0.723561	-5.49288
P04114	APOB	INM:SMES	-0.164468	13.8397	-0.86817	0.397278	0.723561	-5.49299
P68104	EEF1A1	INM:SMES	-0.1288	14.4066	-0.867507	0.397631	0.723561	-5.49352
O75534	CSDE1	INM:SMES	0.172351	11.9755	0.867329	0.397726	0.723561	-5.49366
Q9Y5L4	TIMM13	INM:SMES	-0.275235	10.5431	-0.864845	0.39905	0.724766	-5.49566
P16435	POR	INM:SMES	-0.210519	11.5114	-0.864399	0.399288	0.724766	-5.49602
Q9BW19	KIFC1	INM:SMES	-0.15449	16.0578	-0.864212	0.399388	0.724766	-5.49617
P07099	EPHX1	INM:SMES	-0.105585	13.899	-0.859717	0.401794	0.724981	-5.49977
Q96MW1	CCDC43	INM:SMES	-0.202736	13.7801	-0.859429	0.401948	0.724981	-5.5
Q9C037	TRIM4	INM:SMES	0.143455	13.4341	0.85915	0.402097	0.724981	-5.50022
Q7Z4H7	HAUS6	INM:SMES	0.246487	12.6278	0.859025	0.402165	0.724981	-5.50032
Q9NZU5	LMCD1	INM:SMES	-0.151343	16.2797	-0.859	0.402178	0.724981	-5.50034
O95182	NDUFA7	INM:SMES	-0.156155	11.2003	-0.858957	0.402201	0.724981	-5.50037
Q9UBQ7	GRHPR	INM:SMES	-0.151693	12.4585	-0.858436	0.402481	0.724981	-5.50079
Q99798	ACO2	INM:SMES	-0.105267	14.4384	-0.857065	0.403217	0.724981	-5.50188
Q96JJ3	ELMO2	INM:SMES	-0.154725	14.8472	-0.856844	0.403336	0.724981	-5.50206
Q5TID7	CCDC181	INM:SMES	-0.169209	14.952	-0.855793	0.403901	0.724981	-5.5029
Q9UGI8	TES	INM:SMES	0.139497	13.7518	0.855755	0.403922	0.724981	-5.50293
P25705	ATP5F1A	INM:SMES	0.163132	17.98	0.855645	0.403981	0.724981	-5.50301
Q5HYI8	RABL3	INM:SMES	-0.120195	14.5416	-0.855335	0.404147	0.724981	-5.50326
Q16512	PKN1	INM:SMES	-0.128231	13.5922	-0.855283	0.404175	0.724981	-5.5033
Q15438	CYTH1	INM:SMES	0.151425	14.5594	0.853665	0.405047	0.725873	-5.50459
Q9Y4W2	LAS1L	INM:SMES	-0.175528	12.7222	-0.852938	0.405439	0.725873	-5.50516
Q9NTM9	CUTC	INM:SMES	-0.156369	13.5247	-0.852502	0.405674	0.725873	-5.50551
Q9NSC2	SALL1	INM:SMES	-0.154818	15.1076	-0.851328	0.406308	0.726409	-5.50644
Q92688	ANP32B	INM:SMES	-0.227281	14.6639	-0.850045	0.407002	0.727052	-5.50745
P11117	ACP2	INM:SMES	0.0963586	13.5776	0.849061	0.407534	0.727328	-5.50823
O75131	CPNE3	INM:SMES	0.19163	14.3759	0.848522	0.407826	0.727328	-5.50866
P62081	RPS7	INM:SMES	0.229855	11.5541	0.846802	0.408757	0.72799	-5.51001
Q75N03	CBLL1	INM:SMES	-0.261691	10.5001	-0.846601	0.408867	0.72799	-5.51017
Q8WXF1	PSPC1	INM:SMES	0.11303	13.4683	0.845122	0.409669	0.728755	-5.51133
Q9NUQ9	CYRIB	INM:SMES	0.148628	14.231	0.84277	0.410948	0.728755	-5.51318
P42785	PRCP	INM:SMES	-0.144058	14.2489	-0.842431	0.411132	0.728755	-5.51345
P39019	RPS19	INM:SMES	0.131336	13.6426	0.841345	0.411723	0.728755	-5.5143
P13796	LCP1	INM:SMES	-0.135858	18.7459	-0.841342	0.411725	0.728755	-5.5143
P40763	STAT3	INM:SMES	-0.234855	12.5432	-0.840965	0.411931	0.728755	-5.5146
O75369	FLNB	INM:SMES	0.146986	12.0403	0.840853	0.411991	0.728755	-5.51468
O75347	TBCA	INM:SMES	0.148404	14.1126	0.839992	0.412461	0.728755	-5.51536
P98171	ARHGAP4	INM:SMES	-0.108345	16.4515	-0.839861	0.412532	0.728755	-5.51546
Q9NR50	EIF2B3	INM:SMES	-0.215061	11.0978	-0.839113	0.412941	0.728755	-5.51604
Q9UN37	VPS4A	INM:SMES	0.251165	12.9987	0.839034	0.412984	0.728755	-5.51611
Q9NTK5	OLA1	INM:SMES	-0.123214	13.9828	-0.837897	0.413604	0.729175	-5.51699
Q8WUX9	CHMP7	INM:SMES	0.171914	13.1352	0.837371	0.413892	0.729175	-5.5174
P33176	KIF5B	INM:SMES	-0.118954	13.1762	-0.83657	0.41433	0.729355	-5.51803
Q16799	RTN1	INM:SMES	-0.230061	11.6683	-0.833693	0.415905	0.731278	-5.52027
Q9Y2Z9	COQ6	INM:SMES	-0.33153	12.0271	-0.833206	0.416173	0.731278	-5.52064
P51648	ALDH3A2	INM:SMES	0.144822	13.2455	0.832248	0.416699	0.731278	-5.52139
P17252	PRKCA	INM:SMES	-0.148938	12.6366	-0.832121	0.416768	0.731278	-5.52148
P33240	CSTF2	INM:SMES	0.132304	13.224	0.828109	0.418975	0.734298	-5.52459
Q86V88	MDP1	INM:SMES	-0.321587	12.0254	-0.827764	0.419165	0.734298	-5.52485
O75915	ARL6IP5	INM:SMES	-0.145199	16.2766	-0.826891	0.419646	0.73455	-5.52553
P49591	SARS1	INM:SMES	0.166055	12.298	0.825902	0.420192	0.734645	-5.52629
P20340	RAB6A	INM:SMES	0.124376	14.2989	0.824566	0.42093	0.734645	-5.52732
P62993	GRB2	INM:SMES	0.0918253	15.9444	0.82441	0.421016	0.734645	-5.52744
Q9NRV9	HEBP1	INM:SMES	-0.192362	12.9578	-0.824345	0.421052	0.734645	-5.52749
Q96SY0	INTS14	INM:SMES	0.176967	11.9864	0.820989	0.422909	0.736967	-5.53006
Q13586	STIM1	INM:SMES	-0.0868224	14.436	-0.820345	0.423266	0.736967	-5.53056
P51812	RPS6KA3	INM:SMES	0.310999	12.1157	0.819712	0.423617	0.736967	-5.53104
Q99417	MYCBP	INM:SMES	0.258274	12.0929	0.819493	0.423739	0.736967	-5.53121
Q96RU3	FNBP1	INM:SMES	0.172489	11.9676	0.81802	0.424557	0.737597	-5.53233
Q9Y5Z4	HEBP2	INM:SMES	-0.124965	14.0306	-0.817619	0.42478	0.737597	-5.53264
Q9NTZ6	RBM12	INM:SMES	-0.11721	13.197	-0.814139	0.426717	0.740055	-5.53529
Q13952	NFYC	INM:SMES	0.206004	12.276	0.813183	0.42725	0.740055	-5.53601
P48507	GCLM	INM:SMES	-0.115036	13.8622	-0.813053	0.427322	0.740055	-5.53611
P17931	LGALS3	INM:SMES	0.242012	14.1769	0.812632	0.427557	0.740055	-5.53643
P35241	RDX	INM:SMES	-0.155737	11.3183	-0.811151	0.428384	0.740793	-5.53755
Q96B97	SH3KBP1	INM:SMES	-0.101137	15.5951	-0.810649	0.428665	0.740793	-5.53793
O43707	ACTN4	INM:SMES	-0.146202	15.7002	-0.809622	0.429239	0.741196	-5.53871
Q15819	UBE2V2	INM:SMES	-0.120515	14.5779	-0.80636	0.431066	0.743423	-5.54117
P62753	RPS6	INM:SMES	-0.141065	17.1955	-0.806099	0.431213	0.743423	-5.54137
Q13155	AIMP2	INM:SMES	0.177269	12.4859	0.8048	0.431942	0.743711	-5.54235
P22681	CBL	INM:SMES	-0.0944122	15.527	-0.804583	0.432064	0.743711	-5.54251
P31939	ATIC	INM:SMES	0.187767	11.1973	0.801815	0.433621	0.745801	-5.54459
Q9H8H3	TMT1A	INM:SMES	0.0996089	13.6221	0.799956	0.434669	0.746107	-5.54598
O43776	NARS1	INM:SMES	0.237042	11.7616	0.799689	0.434819	0.746107	-5.54618
Q9H0D6	XRN2	INM:SMES	0.122157	14.7159	0.798427	0.435531	0.746107	-5.54712
P04920	SLC4A2	INM:SMES	0.17323	11.8738	0.79698	0.436349	0.746107	-5.5482
P37837	TALDO1	INM:SMES	-0.119609	15.2063	-0.796874	0.436409	0.746107	-5.54828
Q92673	SORL1	INM:SMES	0.0777801	16.0376	0.796157	0.436815	0.746107	-5.54881
Q5JTV8	TOR1AIP1	INM:SMES	0.135675	14.8055	0.795932	0.436942	0.746107	-5.54898
Q13574	DGKZ	INM:SMES	0.141055	13.6331	0.795078	0.437425	0.746107	-5.54962
O94915	FRYL	INM:SMES	-0.1219	13.7644	-0.794785	0.437591	0.746107	-5.54983
Q8N1F7	NUP93	INM:SMES	-0.0988345	13.1213	-0.794411	0.437803	0.746107	-5.55011
Q93008	USP9X	INM:SMES	-0.121107	13.2623	-0.793143	0.438522	0.746107	-5.55105
O43493	TGOLN2	INM:SMES	-0.267946	10.2723	-0.793076	0.438559	0.746107	-5.5511
Q9BZF1	OSBPL8	INM:SMES	0.169162	12.053	0.792722	0.43876	0.746107	-5.55136
Q8N5H7	SH2D3C	INM:SMES	0.202007	11.3753	0.792547	0.43886	0.746107	-5.55149
Q5HYW2		INM:SMES	-0.100081	14.0925	-0.791642	0.439373	0.746107	-5.55216
P04040	CAT	INM:SMES	-0.0916294	16.842	-0.789647	0.440507	0.746107	-5.55364
A0FGR8	ESYT2	INM:SMES	0.107871	12.3389	0.789542	0.440566	0.746107	-5.55372
P60953	CDC42	INM:SMES	-0.175245	16.2293	-0.789342	0.44068	0.746107	-5.55387
P78406	RAE1	INM:SMES	-0.315992	12.6829	-0.789082	0.440828	0.746107	-5.55406
Q96N66	MBOAT7	INM:SMES	0.157952	17.0842	0.788465	0.441179	0.746107	-5.55451
P07384	CAPN1	INM:SMES	0.114426	14.0775	0.788325	0.441259	0.746107	-5.55462
P52732	KIF11	INM:SMES	-0.236253	13.1738	-0.788166	0.441349	0.746107	-5.55473
Q8N4C6	NIN	INM:SMES	-0.292983	17.4956	-0.785797	0.4427	0.747808	-5.55648
P11766	ADH5	INM:SMES	-0.240941	15.1181	-0.785048	0.443127	0.747949	-5.55703
Q14697	GANAB	INM:SMES	-0.129597	17.7037	-0.782485	0.444591	0.749608	-5.55891
P31483	TIA1	INM:SMES	0.154631	13.6711	0.781806	0.44498	0.749608	-5.55941
Q8WWI1	LMO7	INM:SMES	-0.207303	13.1391	-0.781519	0.445144	0.749608	-5.55962
P52435	POLR2J	INM:SMES	-0.138693	11.7139	-0.780802	0.445554	0.749718	-5.56014
Q96QR8	PURB	INM:SMES	-0.132669	12.0768	-0.779617	0.446234	0.749879	-5.56101
O15400	STX7	INM:SMES	-0.110333	15.9776	-0.779432	0.44634	0.749879	-5.56114
O00391	QSOX1	INM:SMES	0.112851	16.2518	0.777557	0.447416	0.750545	-5.56251
Q96AX2	RAB37	INM:SMES	-0.185211	12.3755	-0.777237	0.4476	0.750545	-5.56274
P00491	PNP	INM:SMES	0.136138	13.8817	0.776376	0.448094	0.750545	-5.56337
Q13423	NNT	INM:SMES	0.185049	15.418	0.776335	0.448118	0.750545	-5.5634
Q6DKI1	RPL7L1	INM:SMES	-0.265352	10.061	-0.775009	0.44888	0.751036	-5.56436
P53671	LIMK2	INM:SMES	-0.236064	11.761	-0.774517	0.449163	0.751036	-5.56472
P11142	HSPA8	INM:SMES	0.0987876	16.5266	0.774025	0.449447	0.751036	-5.56508
Q9Y3E1	HDGFL3	INM:SMES	-0.15414	11.7046	-0.773384	0.449816	0.751075	-5.56554
P08575	PTPRC	INM:SMES	-0.122031	16.9541	-0.77169	0.450792	0.752128	-5.56677
P21399	ACO1	INM:SMES	0.131894	13.9829	0.770114	0.451702	0.753068	-5.56791
Q96QH2	PRAM1	INM:SMES	-0.135099	14.8991	-0.769056	0.452313	0.753509	-5.56867
Q14676	MDC1	INM:SMES	-0.182045	13.6051	-0.768445	0.452667	0.753521	-5.56911
Q9H2M9	RAB3GAP2	INM:SMES	-0.0964125	14.4182	-0.767055	0.453471	0.754282	-5.57011
Q6ZMI0	PPP1R21	INM:SMES	-0.181885	12.2876	-0.764129	0.455168	0.756525	-5.57221
Q01105	SET	INM:SMES	-0.129408	13.3036	-0.760227	0.457435	0.759144	-5.575
O15120	AGPAT2	INM:SMES	0.0979798	14.8579	0.760215	0.457442	0.759144	-5.57501
Q71DI3	H3C14	INM:SMES	0.117267	18.5772	0.758871	0.458225	0.759863	-5.57597
Q8NFH5	NUP35	INM:SMES	0.194186	11.8313	0.757097	0.45926	0.760328	-5.57723
Q5T440	IBA57	INM:SMES	-0.20431	11.1898	-0.756277	0.459738	0.760328	-5.57781
P40121	CAPG	INM:SMES	-0.118766	15.2784	-0.756217	0.459773	0.760328	-5.57785
Q9Y262	EIF3L	INM:SMES	0.112758	13.1754	0.754975	0.460498	0.760328	-5.57873
Q99698	LYST	INM:SMES	0.117014	12.0905	0.754903	0.460541	0.760328	-5.57878
P31749	AKT1	INM:SMES	-0.221846	11.9629	-0.754795	0.460604	0.760328	-5.57886
O43390	HNRNPR	INM:SMES	0.144039	13.9597	0.753595	0.461306	0.760582	-5.57971
Q9Y512	SAMM50	INM:SMES	-0.163933	12.2267	-0.753336	0.461457	0.760582	-5.57989
Q6J4K2	SLC8B1	INM:SMES	0.148861	13.5982	0.752544	0.461921	0.760769	-5.58045
O15031	PLXNB2	INM:SMES	-0.239127	11.2904	-0.75073	0.462984	0.761943	-5.58173
P51149	RAB7A	INM:SMES	0.147345	15.7229	0.749986	0.46342	0.762084	-5.58226
Q9BTV4	TMEM43	INM:SMES	-0.11288	15.328	-0.749105	0.463937	0.762358	-5.58288
P50995	ANXA11	INM:SMES	-0.123788	16.321	-0.7484	0.464351	0.762462	-5.58337
P58335	ANTXR2	INM:SMES	-0.111764	15.4167	-0.744395	0.466707	0.765752	-5.58618
O95295	SNAPIN	INM:SMES	-0.224848	11.7824	-0.742949	0.46756	0.766573	-5.58719
P12110	COL6A2	INM:SMES	-0.444898	11.8926	-0.741465	0.468436	0.767416	-5.58823
Q8NFD5	ARID1B	INM:SMES	-0.232804	9.48973	-0.740882	0.46878	0.767416	-5.58863
Q9Y570	PPME1	INM:SMES	0.129731	12.67	0.738161	0.470389	0.769471	-5.59052
P00747	PLG	INM:SMES	0.154258	12.6859	0.736318	0.471481	0.770287	-5.5918
P48643	CCT5	INM:SMES	-0.0926697	14.7906	-0.735638	0.471885	0.770287	-5.59227
P49756	RBM25	INM:SMES	-0.151105	12.2571	-0.735526	0.471951	0.770287	-5.59235
P05107	ITGB2	INM:SMES	0.118908	18.1707	0.733656	0.473061	0.771519	-5.59364
Q9H0E2	TOLLIP	INM:SMES	0.166836	13.5043	0.732262	0.47389	0.772115	-5.5946
Q07666	KHDRBS1	INM:SMES	-0.101448	13.2439	-0.731846	0.474137	0.772115	-5.59489
Q01433	AMPD2	INM:SMES	-0.13887	12.184	-0.730752	0.474788	0.772296	-5.59564
O95861	BPNT1	INM:SMES	-0.136269	11.6863	-0.729927	0.47528	0.772296	-5.59621
Q96C19	EFHD2	INM:SMES	0.116959	16.8921	0.72987	0.475314	0.772296	-5.59625
P41252	IARS1	INM:SMES	0.142299	13.6994	0.728787	0.475959	0.772767	-5.59699
Q9H9C1	VIPAS39	INM:SMES	-0.165433	11.5998	-0.728021	0.476416	0.772932	-5.59752
Q86Y82	STX12	INM:SMES	0.125199	12.0968	0.727063	0.476988	0.773143	-5.59817
Q05519	SRSF11	INM:SMES	-0.137387	12.2593	-0.726535	0.477303	0.773143	-5.59853
Q14103	HNRNPD	INM:SMES	-0.213389	14.5851	-0.725753	0.47777	0.773143	-5.59907
O43516	WIPF1	INM:SMES	-0.0967435	16.8512	-0.725164	0.478122	0.773143	-5.59947
O94906	PRPF6	INM:SMES	-0.165195	12.2007	-0.724609	0.478454	0.773143	-5.59985
O00192	ARVCF	INM:SMES	0.115361	12.8513	0.724231	0.47868	0.773143	-5.60011
Q9NVP1	DDX18	INM:SMES	-0.167552	12.1335	-0.722165	0.479917	0.774565	-5.60151
Q13418	ILK	INM:SMES	-0.10817	14.8475	-0.719496	0.481518	0.775969	-5.60332
O95644	NFATC1	INM:SMES	-0.146922	12.2418	-0.719087	0.481763	0.775969	-5.6036
Q8N5Y2	MSL3	INM:SMES	-0.09546	12.6635	-0.718532	0.482097	0.775969	-5.60398
Q9NUP1	BLOC1S4	INM:SMES	0.13306	13.2106	0.717894	0.48248	0.775969	-5.60441
Q12906	ILF3	INM:SMES	-0.136063	13.6145	-0.717544	0.482691	0.775969	-5.60464
Q99747	NAPG	INM:SMES	-0.105783	13.1147	-0.7164	0.483379	0.775969	-5.60542
O95260	ATE1	INM:SMES	-0.121755	13.067	-0.715982	0.48363	0.775969	-5.6057
O14646	CHD1	INM:SMES	-0.101258	14.0191	-0.715874	0.483695	0.775969	-5.60577
Q04837	SSBP1	INM:SMES	-0.145819	13.7843	-0.71537	0.483999	0.775969	-5.60611
Q9BZ95	NSD3	INM:SMES	0.143453	13.888	0.713988	0.484832	0.776264	-5.60704
Q5GLZ8	HERC4	INM:SMES	0.135716	12.1139	0.713879	0.484897	0.776264	-5.60712
Q6P179	ERAP2	INM:SMES	-0.168428	13.0789	-0.712685	0.485617	0.776844	-5.60792
P20020	ATP2B1	INM:SMES	-0.165913	11.6306	-0.711091	0.486579	0.777811	-5.60899
P14854	COX6B1	INM:SMES	0.0979187	16.0255	0.710188	0.487125	0.777894	-5.60959
P55010	EIF5	INM:SMES	-0.151991	11.1275	-0.709822	0.487346	0.777894	-5.60984
Q13546	RIPK1	INM:SMES	0.115413	13.8879	0.709182	0.487734	0.777941	-5.61026
Q16401	PSMD5	INM:SMES	0.112557	12.5537	0.707857	0.488536	0.778649	-5.61115
Q9NYC9	DNAH9	INM:SMES	-0.14503	12.2046	-0.705171	0.490163	0.780154	-5.61294
Q5T447	HECTD3	INM:SMES	-0.0902146	12.6178	-0.704557	0.490536	0.780154	-5.61335
Q09666	AHNAK	INM:SMES	-0.0910105	14.6153	-0.704523	0.490557	0.780154	-5.61337
Q14677	CLINT1	INM:SMES	-0.154827	11.4384	-0.703122	0.491407	0.780808	-5.6143
P18669	PGAM1	INM:SMES	-0.162653	14.0056	-0.702663	0.491686	0.780808	-5.6146
Q9UQ35	SRRM2	INM:SMES	-0.099303	12.3639	-0.700811	0.492813	0.782026	-5.61583
Q96KP4	CNDP2	INM:SMES	0.16335	14.0088	0.699526	0.493595	0.782696	-5.61668
Q15120	PDK3	INM:SMES	0.121386	14.3991	0.698413	0.494274	0.783201	-5.61741
P62487	POLR2G	INM:SMES	-0.118015	11.9591	-0.696627	0.495363	0.78342	-5.61859
Q9H061	TMEM126A	INM:SMES	-0.101475	13.6888	-0.695755	0.495895	0.78342	-5.61916
Q709C8	VPS13C	INM:SMES	-0.132973	12.7701	-0.694821	0.496467	0.78342	-5.61977
Q9UQE7	SMC3	INM:SMES	-0.0944124	13.8299	-0.694568	0.496621	0.78342	-5.61994
P10599	TXN	INM:SMES	-0.157666	14.8154	-0.693662	0.497175	0.78342	-5.62053
Q00325	SLC25A3	INM:SMES	-0.134868	14.2836	-0.693592	0.497218	0.78342	-5.62058
Q9BTT0	ANP32E	INM:SMES	-0.111926	16.1055	-0.693553	0.497242	0.78342	-5.6206
Q9P0U4	CXXC1	INM:SMES	-0.143065	13.2419	-0.692331	0.497989	0.78342	-5.6214
O75643	SNRNP200	INM:SMES	-0.107203	14.1629	-0.692214	0.498061	0.78342	-5.62148
O94776	MTA2	INM:SMES	0.19042	13.2092	0.691052	0.498773	0.78342	-5.62224
Q96KP1	EXOC2	INM:SMES	-0.0992582	13.4976	-0.690874	0.498882	0.78342	-5.62235
Q7Z4F1	LRP10	INM:SMES	0.113638	12.6852	0.690808	0.498923	0.78342	-5.6224
P50570	DNM2	INM:SMES	0.145484	15.0305	0.690524	0.499097	0.78342	-5.62258
P31946	YWHAB	INM:SMES	-0.121385	16.5971	-0.686343	0.501664	0.786881	-5.6253
P18206	VCL	INM:SMES	-0.0919967	17.073	-0.681914	0.504392	0.790108	-5.62816
P16070	CD44	INM:SMES	0.100166	16.1855	0.681226	0.504816	0.790108	-5.6286
P67775	PPP2CA	INM:SMES	0.120032	13.8075	0.680965	0.504977	0.790108	-5.62877
O00203	AP3B1	INM:SMES	-0.118107	12.5476	-0.680645	0.505175	0.790108	-5.62898
Q9Y295	DRG1	INM:SMES	-0.136863	11.7773	-0.67962	0.505808	0.790529	-5.62964
Q00577	PURA	INM:SMES	-0.134677	11.7884	-0.678275	0.50664	0.79126	-5.6305
P00338	LDHA	INM:SMES	0.194697	17.3652	0.677161	0.507329	0.791323	-5.63121
Q9NS15	LTBP3	INM:SMES	-0.214721	11.3994	-0.677033	0.507408	0.791323	-5.63129
O75874	IDH1	INM:SMES	0.093203	15.3577	0.675526	0.508341	0.791521	-5.63226
P42574	CASP3	INM:SMES	0.204003	12.4279	0.675339	0.508457	0.791521	-5.63238
Q08752	PPID	INM:SMES	0.172834	12.9082	0.675064	0.508627	0.791521	-5.63255
Q9BVG4	PBDC1	INM:SMES	-0.161056	11.461	-0.673234	0.509763	0.792721	-5.63372
Q15526	SURF1	INM:SMES	-0.151779	13.0977	-0.671572	0.510794	0.793758	-5.63478
P22415	USF1	INM:SMES	0.233037	11.7543	0.670374	0.511539	0.794003	-5.63553
P84085	ARF5	INM:SMES	0.130644	13.588	0.670143	0.511683	0.794003	-5.63568
Q9NYA4	MTMR4	INM:SMES	0.124354	13.607	0.668996	0.512397	0.794214	-5.63641
Q00169	PITPNA	INM:SMES	-0.226473	13.0567	-0.66846	0.51273	0.794214	-5.63675
Q14203	DCTN1	INM:SMES	-0.1121	12.8947	-0.667995	0.51302	0.794214	-5.63704
Q29RF7	PDS5A	INM:SMES	-0.0735744	14.7558	-0.667577	0.51328	0.794214	-5.6373
Q92609	TBC1D5	INM:SMES	-0.0952958	13.0954	-0.666362	0.514037	0.794347	-5.63807
P48739	PITPNB	INM:SMES	-0.0899419	13.2903	-0.66572	0.514438	0.794347	-5.63848
Q8N0U8	VKORC1L1	INM:SMES	0.241546	10.8035	0.665681	0.514462	0.794347	-5.6385
P0DOY2		INM:SMES	0.098319	12.9518	0.663751	0.515667	0.794646	-5.63971
Q08043	ACTN3	INM:SMES	-0.105693	13.3321	-0.662985	0.516146	0.794646	-5.64019
P35609	ACTN2	INM:SMES	0.244091	12.3588	0.662354	0.51654	0.794646	-5.64059
P23919	DTYMK	INM:SMES	-0.124226	12.3006	-0.66226	0.516599	0.794646	-5.64065
P01040	CSTA	INM:SMES	-0.130916	14.4199	-0.662245	0.516608	0.794646	-5.64066
P35813	PPM1A	INM:SMES	0.138384	12.2347	0.661791	0.516892	0.794646	-5.64094
Q14683	SMC1A	INM:SMES	0.0885514	14.1219	0.661276	0.517214	0.794646	-5.64127
Q5SYE7	NHSL1	INM:SMES	-0.117361	16.0545	-0.658329	0.51906	0.796919	-5.64311
P42025	ACTR1B	INM:SMES	0.135751	12.8064	0.65712	0.519818	0.79752	-5.64386
P36871	PGM1	INM:SMES	0.209399	12.1114	0.656099	0.520459	0.79794	-5.64449
Q9BRG1	VPS25	INM:SMES	-0.0943261	12.1907	-0.654172	0.52167	0.798389	-5.64569
Q02878	RPL6	INM:SMES	0.0997294	16.7158	0.654157	0.52168	0.798389	-5.6457
O14818	PSMA7	INM:SMES	0.194769	13.1267	0.652939	0.522446	0.798389	-5.64645
P00367	GLUD1	INM:SMES	0.109702	14.4916	0.652151	0.522942	0.798389	-5.64694
P09525	ANXA4	INM:SMES	-0.118113	14.873	-0.651453	0.523381	0.798389	-5.64737
Q53GL0	PLEKHO1	INM:SMES	0.137116	11.6109	0.65117	0.52356	0.798389	-5.64754
Q6ZNJ1	NBEAL2	INM:SMES	0.0880491	13.9498	0.65097	0.523686	0.798389	-5.64767
Q12905	ILF2	INM:SMES	0.0961845	13.3828	0.650884	0.52374	0.798389	-5.64772
Q9UKK3	PARP4	INM:SMES	0.0920417	13.2757	0.65038	0.524058	0.798389	-5.64803
P53597	SUCLG1	INM:SMES	0.146518	11.836	0.649228	0.524784	0.798936	-5.64874
P09960	LTA4H	INM:SMES	0.142976	15.0015	0.648073	0.525513	0.799486	-5.64945
Q07020	RPL18	INM:SMES	-0.0992684	12.8684	-0.645904	0.526884	0.80101	-5.65078
P78368	CSNK1G2	INM:SMES	0.0796816	12.9054	0.644164	0.527984	0.802123	-5.65184
Q969H8	MYDGF	INM:SMES	0.142755	11.4974	0.641793	0.529486	0.802418	-5.65329
Q8NCN5	PDPR	INM:SMES	-0.125032	13.4014	-0.641742	0.529518	0.802418	-5.65332
A0AV96	RBM47	INM:SMES	-0.127088	13.3482	-0.641732	0.529525	0.802418	-5.65332
Q92572	AP3S1	INM:SMES	0.0991591	14.1289	0.641527	0.529655	0.802418	-5.65345
O94886	TMEM63A	INM:SMES	0.0759714	13.4146	0.639606	0.530874	0.803069	-5.65462
P20701	ITGAL	INM:SMES	0.067233	16.7096	0.639423	0.53099	0.803069	-5.65473
P00387	CYB5R3	INM:SMES	-0.10254	14.9704	-0.638776	0.531401	0.803069	-5.65512
Q9ULD5	ZNF777	INM:SMES	-0.0912519	14.1581	-0.638522	0.531562	0.803069	-5.65527
Q15149	PLEC	INM:SMES	-0.0682688	15.2728	-0.635649	0.533389	0.803978	-5.65701
Q9BW71	HIRIP3	INM:SMES	-0.0923384	15.4416	-0.635141	0.533713	0.803978	-5.65731
P54727	RAD23B	INM:SMES	0.120584	12.6336	0.634718	0.533982	0.803978	-5.65757
Q92890	UFD1	INM:SMES	0.0887416	15.9174	0.634539	0.534096	0.803978	-5.65768
Q04446	GBE1	INM:SMES	0.12691	14.0169	0.634278	0.534262	0.803978	-5.65783
P62330	ARF6	INM:SMES	-0.0767936	17.1399	-0.634089	0.534383	0.803978	-5.65795
Q16831	UPP1	INM:SMES	-0.213604	12.382	-0.633265	0.534908	0.804211	-5.65844
P16885	PLCG2	INM:SMES	-0.086291	14.8926	-0.632081	0.535663	0.80479	-5.65915
Q9P2R3	ANKFY1	INM:SMES	-0.113174	12.5709	-0.629527	0.537294	0.806375	-5.66068
Q17RS7	GEN1	INM:SMES	-0.25035	14.6786	-0.629268	0.53746	0.806375	-5.66083
Q12968	NFATC3	INM:SMES	-0.162875	10.6039	-0.627487	0.538599	0.807527	-5.6619
Q9GZV4	EIF5A2	INM:SMES	-0.170503	13.0674	-0.625733	0.539722	0.808185	-5.66294
Q9UKY7	CDV3	INM:SMES	-0.159968	11.672	-0.625641	0.539781	0.808185	-5.66299
Q16629	SRSF7	INM:SMES	-0.0921828	16.0245	-0.622178	0.542002	0.809485	-5.66504
Q9UNM6	PSMD13	INM:SMES	-0.0977839	14.4254	-0.621954	0.542146	0.809485	-5.66518
Q96MG7	NSMCE3	INM:SMES	-0.174364	10.6226	-0.620979	0.542773	0.809485	-5.66575
P50452	SERPINB8	INM:SMES	-0.174751	11.9103	-0.620167	0.543294	0.809485	-5.66623
Q10472	GALNT1	INM:SMES	-0.116402	13.7563	-0.620057	0.543365	0.809485	-5.6663
O95425	SVIL	INM:SMES	-0.161233	13.6332	-0.619358	0.543815	0.809485	-5.66671
P53992	SEC24C	INM:SMES	-0.0971594	15.6431	-0.618568	0.544323	0.809485	-5.66717
Q8IV53	DENND1C	INM:SMES	-0.198539	14.3054	-0.618414	0.544423	0.809485	-5.66726
O95169	NDUFB8	INM:SMES	-0.0980949	13.8933	-0.618262	0.54452	0.809485	-5.66735
P55884	EIF3B	INM:SMES	-0.123327	12.1284	-0.617595	0.54495	0.809485	-5.66774
Q6F5E8	CARMIL2	INM:SMES	-0.10571	11.8703	-0.61705	0.545301	0.809485	-5.66806
Q6P4E1	GOLM2	INM:SMES	-0.0963543	12.2262	-0.616685	0.545536	0.809485	-5.66828
P29692	EEF1D	INM:SMES	0.0729486	15.271	0.616327	0.545767	0.809485	-5.66848
Q8NBX0	SCCPDH	INM:SMES	-0.0896323	15.5252	-0.616178	0.545863	0.809485	-5.66857
Q8N3U4	STAG2	INM:SMES	-0.0855583	14.4282	-0.613622	0.547512	0.811378	-5.67006
Q13011	ECH1	INM:SMES	0.135911	12.1576	0.612825	0.548027	0.811587	-5.67053
P80188	LCN2	INM:SMES	0.155631	16.3079	0.611919	0.548612	0.81187	-5.67106
P51003	PAPOLA	INM:SMES	0.139952	11.9723	0.611119	0.54913	0.81187	-5.67152
P05164	MPO	INM:SMES	0.0868483	21.5299	0.610442	0.549567	0.81187	-5.67191
O00160	MYO1F	INM:SMES	0.0944334	14.3338	0.609421	0.550228	0.81187	-5.67251
P36969	GPX4	INM:SMES	-0.141105	14.5113	-0.609264	0.55033	0.81187	-5.6726
Q66K14	TBC1D9B	INM:SMES	-0.167376	12.2473	-0.608578	0.550774	0.81187	-5.67299
Q8N137	CNTROB	INM:SMES	-0.175068	10.8945	-0.608489	0.550832	0.81187	-5.67304
Q9NVH2	INTS7	INM:SMES	0.152978	11.3819	0.607904	0.551211	0.811878	-5.67338
Q9Y5P4	CERT1	INM:SMES	-0.110226	12.4049	-0.607002	0.551796	0.811878	-5.6739
Q7Z7A1	CNTRL	INM:SMES	-0.223025	11.9798	-0.605715	0.55263	0.811878	-5.67465
P46379	BAG6	INM:SMES	0.104748	12.9762	0.604901	0.553158	0.811878	-5.67511
Q96F46	IL17RA	INM:SMES	-0.0952906	12.7962	-0.604426	0.553467	0.811878	-5.67539
Q9BTX1	NDC1	INM:SMES	-0.192959	11.6418	-0.604401	0.553483	0.811878	-5.6754
P23284	PPIB	INM:SMES	-0.122313	15.3037	-0.604191	0.55362	0.811878	-5.67552
P09651	HNRNPA1	INM:SMES	-0.0932244	15.3187	-0.603875	0.553825	0.811878	-5.6757
Q92934	BAD	INM:SMES	-0.157051	11.1078	-0.603022	0.554379	0.812143	-5.67619
P84077	ARF1	INM:SMES	0.131905	14.1814	0.601883	0.55512	0.812188	-5.67684
Q96FZ7	CHMP6	INM:SMES	-0.183551	11.6379	-0.601719	0.555226	0.812188	-5.67694
Q04206	RELA	INM:SMES	0.0913194	12.8857	0.599988	0.556353	0.812188	-5.67793
Q14571	ITPR2	INM:SMES	0.175993	11.2053	0.599407	0.556732	0.812188	-5.67826
Q15269	PWP2	INM:SMES	-0.0787787	14.417	-0.599291	0.556808	0.812188	-5.67832
Q13043	STK4	INM:SMES	-0.0661438	15.3299	-0.598546	0.557293	0.812188	-5.67875
Q96BM9	ARL8A	INM:SMES	-0.0849675	13.3739	-0.597935	0.557691	0.812188	-5.6791
O94819	KBTBD11	INM:SMES	0.0966966	12.6052	0.597401	0.55804	0.812188	-5.6794
P10644	PRKAR1A	INM:SMES	-0.167552	10.7745	-0.595925	0.559003	0.812188	-5.68024
P06737	PYGL	INM:SMES	0.124786	17.6568	0.59568	0.559163	0.812188	-5.68038
P06753	TPM3	INM:SMES	-0.121462	18.5327	-0.5953	0.559411	0.812188	-5.68059
Q96D71	REPS1	INM:SMES	0.085253	12.6182	0.594781	0.55975	0.812188	-5.68089
Q96P48	ARAP1	INM:SMES	-0.0845614	16.4444	-0.594721	0.559789	0.812188	-5.68092
O60884	DNAJA2	INM:SMES	-0.10375	12.2293	-0.594212	0.560122	0.812188	-5.68121
Q01085	TIAL1	INM:SMES	0.246774	10.5962	0.594033	0.560239	0.812188	-5.68131
Q86WJ1	CHD1L	INM:SMES	0.218721	11.8413	0.593248	0.560752	0.812188	-5.68175
P07237	P4HB	INM:SMES	0.0763883	18.4191	0.593234	0.560761	0.812188	-5.68176
O95758	PTBP3	INM:SMES	0.0747692	14.1747	0.591348	0.561995	0.813434	-5.68282
P60709	ACTB	INM:SMES	0.142839	20.5397	0.589288	0.563345	0.814844	-5.68398
P51798	CLCN7	INM:SMES	0.140966	11.1569	0.587749	0.564354	0.815762	-5.68484
Q92608	DOCK2	INM:SMES	-0.079362	15.148	-0.586354	0.56527	0.815839	-5.68562
O75923	DYSF	INM:SMES	-0.0800451	16.1115	-0.58596	0.565528	0.815839	-5.68584
Q16134	ETFDH	INM:SMES	0.139709	12.4882	0.585812	0.565626	0.815839	-5.68592
P13378	HOXD8	INM:SMES	0.196377	11.4015	0.585358	0.565924	0.815839	-5.68618
Q96PK6	RBM14	INM:SMES	-0.087195	14.4393	-0.584811	0.566284	0.815839	-5.68648
Q12923	PTPN13	INM:SMES	0.145993	11.4721	0.583727	0.566996	0.815959	-5.68708
Q13576	IQGAP2	INM:SMES	0.0897313	15.4979	0.583165	0.567366	0.815959	-5.6874
Q96A00	PPP1R14A	INM:SMES	-0.174009	10.8662	-0.582492	0.567809	0.815959	-5.68777
Q13451	FKBP5	INM:SMES	-0.142421	13.2632	-0.582402	0.567868	0.815959	-5.68782
Q641Q2	WASHC2A	INM:SMES	-0.0990531	14.1019	-0.580618	0.569043	0.816615	-5.68881
Q8TDZ2	MICAL1	INM:SMES	0.10362	13.1	0.580568	0.569076	0.816615	-5.68883
P49757	NUMB	INM:SMES	0.0775246	13.8782	0.579878	0.569531	0.816729	-5.68922
Q12982	BNIP2	INM:SMES	0.124289	12.1056	0.579065	0.570067	0.816959	-5.68966
Q8IWB1	ITPRIP	INM:SMES	-0.182858	11.8736	-0.577857	0.570865	0.817563	-5.69033
Q9H3K6	BOLA2	INM:SMES	0.103313	13.4217	0.574181	0.573294	0.820219	-5.69235
P62979	RPS27A	INM:SMES	-0.135544	12.6222	-0.573908	0.573474	0.820219	-5.6925
P28290	ITPRID2	INM:SMES	-0.159292	12.0957	-0.572506	0.574402	0.821007	-5.69326
P30153	PPP2R1A	INM:SMES	0.0765118	14.7133	0.57056	0.575692	0.82139	-5.69432
P14406	COX7A2	INM:SMES	0.189639	13.1336	0.570555	0.575695	0.82139	-5.69432
P42285	MTREX	INM:SMES	-0.0698487	14.0438	-0.570323	0.575849	0.82139	-5.69445
Q9Y6W5	WASF2	INM:SMES	0.168807	10.7598	0.568015	0.577381	0.82139	-5.6957
Q96HC4	PDLIM5	INM:SMES	-0.175882	10.2289	-0.567755	0.577553	0.82139	-5.69584
P22102	GART	INM:SMES	-0.095883	12.8423	-0.567641	0.577629	0.82139	-5.6959
Q16543	CDC37	INM:SMES	-0.0779638	13.9828	-0.567453	0.577754	0.82139	-5.69601
O00571	DDX3X	INM:SMES	0.0800591	13.5446	0.565695	0.578922	0.82139	-5.69695
Q9NS86	LANCL2	INM:SMES	-0.112128	11.857	-0.564085	0.579993	0.82139	-5.69782
Q5T200	ZC3H13	INM:SMES	0.112247	13.8455	0.564014	0.58004	0.82139	-5.69786
Q8TAT6	NPLOC4	INM:SMES	0.0869057	12.2631	0.563453	0.580413	0.82139	-5.69816
Q16854	DGUOK	INM:SMES	-0.153634	12.7566	-0.563063	0.580674	0.82139	-5.69837
Q6PI78	TMEM65	INM:SMES	-0.14608	11.8637	-0.562748	0.580883	0.82139	-5.69854
Q8TBY0	RBM46	INM:SMES	-0.0975681	15.8088	-0.562678	0.58093	0.82139	-5.69858
P08559	PDHA1	INM:SMES	-0.119674	13.0802	-0.562409	0.581109	0.82139	-5.69872
Q8N4Q0	PTGR3	INM:SMES	0.11875	12.3186	0.561836	0.581491	0.82139	-5.69903
Q16851	UGP2	INM:SMES	-0.0823969	16.8358	-0.561531	0.581694	0.82139	-5.69919
P46776	RPL27A	INM:SMES	0.211426	12.2855	0.561104	0.581979	0.82139	-5.69942
Q9NRA2	SLC17A5	INM:SMES	-0.0789794	14.8179	-0.56103	0.582028	0.82139	-5.69946
P14625	HSP90B1	INM:SMES	0.0806607	16.0259	0.560252	0.582547	0.82139	-5.69988
Q96BS2	TESC	INM:SMES	0.158806	12.2162	0.560164	0.582605	0.82139	-5.69992
P22695	UQCRC2	INM:SMES	0.163788	13.3	0.559117	0.583304	0.821843	-5.70048
O00330	PDHX	INM:SMES	0.0874745	12.3996	0.557569	0.584338	0.822765	-5.70131
P08311	CTSG	INM:SMES	0.103053	21.6052	0.554641	0.586296	0.824988	-5.70286
Q6ZT62		INM:SMES	0.0833894	13.6701	0.552548	0.587697	0.826225	-5.70396
Q9HCU9	BRMS1	INM:SMES	-0.126917	11.4985	-0.552193	0.587935	0.826225	-5.70415
Q969E2	SCAMP4	INM:SMES	0.170503	12.0357	0.551172	0.588619	0.826397	-5.70469
Q13464	ROCK1	INM:SMES	-0.0852313	15.9613	-0.550877	0.588817	0.826397	-5.70484
P30101	PDIA3	INM:SMES	0.0643214	16.2866	0.550208	0.589266	0.826493	-5.7052
Q9Y6N5	SQOR	INM:SMES	-0.0761385	17.1839	-0.548276	0.590563	0.827362	-5.70621
P61586	RHOA	INM:SMES	0.118146	14.6294	0.548152	0.590646	0.827362	-5.70627
Q9Y2G3	ATP11B	INM:SMES	0.107863	13.0554	0.546351	0.591856	0.82829	-5.70721
Q15437	SEC23B	INM:SMES	-0.0711412	11.8689	-0.545699	0.592295	0.82829	-5.70755
P43405	SYK	INM:SMES	-0.198851	14.8201	-0.544634	0.593011	0.82829	-5.70811
P09543	CNP	INM:SMES	-0.10169	15.2504	-0.544051	0.593404	0.82829	-5.70841
O94826	TOMM70	INM:SMES	-0.163394	12.0083	-0.543885	0.593516	0.82829	-5.7085
P0CG48	UBC	INM:SMES	0.0938636	19.5623	0.543767	0.593595	0.82829	-5.70856
Q99567	NUP88	INM:SMES	-0.0731971	15.3387	-0.5426	0.594381	0.828855	-5.70916
P08195	SLC3A2	INM:SMES	0.0863815	12.5968	0.541257	0.595286	0.829272	-5.70986
P31943	HNRNPH1	INM:SMES	0.0835549	17.1354	0.540976	0.595476	0.829272	-5.71
P11274	BCR	INM:SMES	0.0680286	15.7832	0.539852	0.596234	0.829272	-5.71058
O43815	STRN	INM:SMES	-0.0835188	12.9814	-0.539455	0.596502	0.829272	-5.71079
Q9NTJ5	SACM1L	INM:SMES	0.0780894	13.6005	0.539328	0.596588	0.829272	-5.71085
P61601	NCALD	INM:SMES	-0.292934	12.3183	-0.535647	0.599075	0.832198	-5.71274
P27695	APEX1	INM:SMES	-0.114597	13.5119	-0.534948	0.599548	0.832274	-5.7131
Q8TC56	GARIN3	INM:SMES	-0.106133	11.4692	-0.534435	0.599896	0.832274	-5.71336
P48449	LSS	INM:SMES	-0.133331	12.1442	-0.531972	0.601564	0.832917	-5.71462
O60610	DIAPH1	INM:SMES	-0.0767302	12.8837	-0.531846	0.601649	0.832917	-5.71468
Q92542	NCSTN	INM:SMES	0.0972165	12.4013	0.531578	0.601831	0.832917	-5.71482
O75694	NUP155	INM:SMES	-0.10419	15.1284	-0.531489	0.601892	0.832917	-5.71486
Q9UM54	MYO6	INM:SMES	-0.210234	15.2315	-0.529828	0.603018	0.833944	-5.7157
Q4KMP7	TBC1D10B	INM:SMES	-0.106405	13.0512	-0.528212	0.604115	0.834715	-5.71652
Q8IZ83	ALDH16A1	INM:SMES	0.101926	11.9429	0.527877	0.604343	0.834715	-5.71669
Q9H2K8	TAOK3	INM:SMES	-0.134178	10.8265	-0.526167	0.605505	0.835158	-5.71755
P17812	CTPS1	INM:SMES	-0.108975	12.6068	-0.52506	0.606258	0.835158	-5.71811
Q14999	CUL7	INM:SMES	-0.12887	12.8778	-0.524668	0.606525	0.835158	-5.7183
Q96GE4	CEP95	INM:SMES	0.161373	19.4758	0.524083	0.606923	0.835158	-5.7186
O60513	B4GALT4	INM:SMES	-0.148927	15.7065	-0.523815	0.607105	0.835158	-5.71873
Q96AQ6	PBXIP1	INM:SMES	-0.0733617	14.5111	-0.522956	0.60769	0.835158	-5.71916
P30626	SRI	INM:SMES	-0.0818816	16.3412	-0.522653	0.607896	0.835158	-5.71931
Q96C86	DCPS	INM:SMES	-0.0831093	12.9806	-0.522237	0.60818	0.835158	-5.71952
P46779	RPL28	INM:SMES	0.0867963	13.8	0.521731	0.608525	0.835158	-5.71977
Q9H2G2	SLK	INM:SMES	0.072718	12.8968	0.521275	0.608836	0.835158	-5.72
Q9H4E7	DEF6	INM:SMES	0.0834925	15.9796	0.520346	0.609469	0.835158	-5.72046
Q96DM3	RMC1	INM:SMES	-0.0823672	13.2289	-0.520263	0.609526	0.835158	-5.7205
P03928	ATP8	INM:SMES	-0.0859361	12.9214	-0.519283	0.610195	0.835158	-5.72099
P50749	RASSF2	INM:SMES	0.154606	12.0037	0.519132	0.610298	0.835158	-5.72107
P48736	PIK3CG	INM:SMES	0.131326	12.7052	0.518944	0.610426	0.835158	-5.72116
Q9UPN9	TRIM33	INM:SMES	0.0923003	14.8138	0.517155	0.611648	0.836114	-5.72205
O15355	PPM1G	INM:SMES	0.163308	12.6854	0.516572	0.612047	0.836114	-5.72233
Q5T9A4	ATAD3B	INM:SMES	-0.123025	11.3394	-0.516233	0.612278	0.836114	-5.7225
Q13459	MYO9B	INM:SMES	-0.073443	13.1193	-0.515364	0.612873	0.8364	-5.72293
O14656	TOR1A	INM:SMES	0.108809	11.8632	0.514421	0.613517	0.836755	-5.72339
B0I1T2	MYO1G	INM:SMES	-0.0924904	14.7949	-0.513328	0.614266	0.83725	-5.72393
P29350	PTPN6	INM:SMES	-0.0637329	15.613	-0.511323	0.615639	0.838366	-5.72491
P26440	IVD	INM:SMES	0.0873159	12.7903	0.511007	0.615856	0.838366	-5.72507
Q12769	NUP160	INM:SMES	-0.161579	11.9476	-0.509147	0.617132	0.83915	-5.72598
Q9Y520	PRRC2C	INM:SMES	0.107608	12.8992	0.50902	0.617219	0.83915	-5.72604
Q06330	RBPJ	INM:SMES	0.0979268	13.1179	0.50848	0.61759	0.83915	-5.7263
P11940	PABPC1	INM:SMES	0.142461	14.0373	0.505794	0.619435	0.841132	-5.7276
P08670	VIM	INM:SMES	-0.0934265	18.5627	-0.504434	0.62037	0.841876	-5.72826
Q96RR4	CAMKK2	INM:SMES	-0.0862032	12.9281	-0.501446	0.622428	0.844005	-5.7297
P36578	RPL4	INM:SMES	0.0804678	13.4769	0.501028	0.622716	0.844005	-5.7299
Q13136	PPFIA1	INM:SMES	-0.0668928	13.0956	-0.500384	0.62316	0.844081	-5.73021
Q04637	EIF4G1	INM:SMES	0.115131	11.9005	0.498654	0.624353	0.84517	-5.73104
P54803	GALC	INM:SMES	-0.102109	12.4306	-0.497785	0.624952	0.845312	-5.73145
P49815	TSC2	INM:SMES	0.124019	11.0169	0.496934	0.625541	0.845312	-5.73186
Q7Z7E8	UBE2Q1	INM:SMES	-0.112254	11.21	-0.496812	0.625625	0.845312	-5.73191
P06239	LCK	INM:SMES	0.09327	12.2356	0.493241	0.628093	0.847704	-5.73361
P29966	MARCKS	INM:SMES	-0.112796	11.5478	-0.493124	0.628174	0.847704	-5.73366
P19878	NCF2	INM:SMES	0.0830725	15.9083	0.491979	0.628967	0.848174	-5.7342
Q02383	SEMG2	INM:SMES	-0.305065	11.3601	-0.491494	0.629303	0.848174	-5.73443
Q86VS8	HOOK3	INM:SMES	-0.0767543	13.7227	-0.490589	0.62993	0.848493	-5.73486
Q6P3W7	SCYL2	INM:SMES	-0.140257	10.6226	-0.488271	0.631537	0.849657	-5.73594
P42166	TMPO	INM:SMES	-0.0962597	12.6407	-0.488216	0.631575	0.849657	-5.73597
Q9UM00	TMCO1	INM:SMES	-0.113837	13.6168	-0.485975	0.633131	0.851222	-5.73702
Q8IXQ4	GPALPP1	INM:SMES	-0.0840077	11.6862	-0.48389	0.63458	0.851582	-5.73798
Q9NUU6	OTULINL	INM:SMES	-0.0807092	13.1492	-0.483764	0.634667	0.851582	-5.73804
P02765	AHSG	INM:SMES	0.131067	14.1103	0.483628	0.634762	0.851582	-5.73811
Q8NBJ5	COLGALT1	INM:SMES	0.0629799	13.7911	0.483336	0.634965	0.851582	-5.73824
Q9HA77	CARS2	INM:SMES	0.140715	11.1996	0.481998	0.635896	0.852304	-5.73886
Q2M2I8	AAK1	INM:SMES	-0.112288	12.2948	-0.481088	0.636529	0.852545	-5.73928
P23458	JAK1	INM:SMES	-0.0646356	14.7032	-0.480613	0.63686	0.852545	-5.7395
Q8N556	AFAP1	INM:SMES	-0.0915304	11.7975	-0.479381	0.637718	0.853169	-5.74007
P22570	FDXR	INM:SMES	-0.0628706	13.6108	-0.478487	0.638342	0.853478	-5.74048
Q02880	TOP2B	INM:SMES	0.0546263	13.1608	0.47623	0.639916	0.854773	-5.74151
Q99613	EIF3C	INM:SMES	-0.0729111	13.7708	-0.475125	0.640688	0.854773	-5.74201
P07195	LDHB	INM:SMES	-0.146049	13.4852	-0.474951	0.640809	0.854773	-5.74209
P11021	HSPA5	INM:SMES	0.0476406	15.7872	0.473845	0.641582	0.854773	-5.7426
P27797	CALR	INM:SMES	-0.0744453	13.1844	-0.473603	0.641751	0.854773	-5.7427
P68402	PAFAH1B2	INM:SMES	-0.066752	12.6406	-0.472974	0.642191	0.854773	-5.74299
Q9Y4K1	CRYBG1	INM:SMES	0.0725239	12.354	0.472254	0.642694	0.854773	-5.74332
Q9Y5L0	TNPO3	INM:SMES	0.107446	13.3849	0.472147	0.642769	0.854773	-5.74337
Q99497	PARK7	INM:SMES	-0.14623	11.3229	-0.471492	0.643227	0.854773	-5.74366
Q86SF2	GALNT7	INM:SMES	-0.067509	12.6354	-0.470142	0.644172	0.854773	-5.74427
Q5TC84	OGFRL1	INM:SMES	0.126607	11.6254	0.470141	0.644173	0.854773	-5.74427
P19838	NFKB1	INM:SMES	0.06649	15.6764	0.470107	0.644197	0.854773	-5.74429
Q16891	IMMT	INM:SMES	-0.0650105	14.1146	-0.468971	0.644992	0.854773	-5.7448
Q9Y624	F11R	INM:SMES	-0.129272	10.4751	-0.468194	0.645536	0.854773	-5.74515
P14868	DARS1	INM:SMES	-0.0696224	15.3786	-0.467554	0.645985	0.854773	-5.74543
Q15181	PPA1	INM:SMES	-0.0689988	13.4219	-0.467537	0.645997	0.854773	-5.74544
Q9UKZ1	CNOT11	INM:SMES	-0.104388	12.9277	-0.467387	0.646102	0.854773	-5.74551
O15357	INPPL1	INM:SMES	0.0746741	12.9289	0.466588	0.646662	0.854773	-5.74587
O95487	SEC24B	INM:SMES	0.103254	13.2162	0.466419	0.646781	0.854773	-5.74594
Q96A65	EXOC4	INM:SMES	0.0996381	12.9228	0.46409	0.648415	0.856084	-5.74698
Q9P0J0	NDUFA13	INM:SMES	0.118362	11.836	0.463795	0.648623	0.856084	-5.74711
Q92888	ARHGEF1	INM:SMES	0.0660082	15.9164	0.463241	0.649011	0.856084	-5.74736
Q9UKM9	RALY	INM:SMES	0.106583	14.9712	0.461961	0.64991	0.856084	-5.74793
Q9BV38	WDR18	INM:SMES	-0.0858662	12.8509	-0.461882	0.649966	0.856084	-5.74796
Q9NPA3	MID1IP1	INM:SMES	-0.150124	10.8141	-0.461642	0.650135	0.856084	-5.74807
Q9NZ08	ERAP1	INM:SMES	0.0706787	14.6301	0.459746	0.651468	0.856403	-5.74891
Q86VP6	CAND1	INM:SMES	0.0596171	13.0453	0.459164	0.651878	0.856403	-5.74916
Q92841	DDX17	INM:SMES	0.0609536	14.1199	0.458303	0.652484	0.856403	-5.74954
O95789	ZMYM6	INM:SMES	-0.0839949	16.4995	-0.457908	0.652762	0.856403	-5.74972
P49821	NDUFV1	INM:SMES	-0.0820776	12.4514	-0.457826	0.65282	0.856403	-5.74975
P50402	EMD	INM:SMES	0.0530098	13.2687	0.457755	0.65287	0.856403	-5.74978
Q9H9F9	ACTR5	INM:SMES	0.105522	11.1618	0.457378	0.653136	0.856403	-5.74995
P30041	PRDX6	INM:SMES	-0.0617902	16.9091	-0.454606	0.65509	0.858448	-5.75116
Q5T2N8	ATAD3C	INM:SMES	-0.171245	14.7811	-0.45357	0.65582	0.858448	-5.75161
Q96HE7	ERO1A	INM:SMES	-0.0822698	13.6173	-0.452994	0.656227	0.858448	-5.75187
Q15436	SEC23A	INM:SMES	-0.0507778	15.7527	-0.452927	0.656274	0.858448	-5.75189
P42677	RPS27	INM:SMES	-0.128733	12.2322	-0.451992	0.656934	0.858726	-5.7523
Q13303	KCNAB2	INM:SMES	-0.0972137	12.7844	-0.45096	0.657664	0.858726	-5.75275
A6NI72		INM:SMES	-0.0696212	15.4844	-0.450571	0.657939	0.858726	-5.75292
Q96Q05	TRAPPC9	INM:SMES	0.0643916	12.4786	0.450388	0.658067	0.858726	-5.753
P56537	EIF6	INM:SMES	0.0888493	12.5731	0.448111	0.659678	0.860312	-5.75398
Q9Y5S8	NOX1	INM:SMES	0.100962	12.351	0.446457	0.660849	0.861322	-5.75469
Q9C0E8	LNPK	INM:SMES	-0.0639011	15.2439	-0.440393	0.665148	0.866406	-5.75727
Q5TDH0	DDI2	INM:SMES	0.084351	13.2149	0.439579	0.665726	0.86664	-5.75761
O00462	MANBA	INM:SMES	0.051141	13.5748	0.437891	0.666926	0.867511	-5.75833
Q8NHH9	ATL2	INM:SMES	0.085286	12.6685	0.437515	0.667193	0.867511	-5.75848
Q9Y2I1	NISCH	INM:SMES	-0.123931	12.3879	-0.436407	0.667981	0.867533	-5.75895
Q9BTD8	RBM42	INM:SMES	-0.124785	12.3258	-0.435972	0.668291	0.867533	-5.75913
O14727	APAF1	INM:SMES	-0.0715198	13.6351	-0.435808	0.668408	0.867533	-5.7592
P42356	PI4KA	INM:SMES	0.0928091	11.7943	0.434694	0.6692	0.868044	-5.75967
P60903	S100A10	INM:SMES	-0.0877403	13.6029	-0.431982	0.671133	0.870031	-5.7608
P07305	H1-0	INM:SMES	0.0964382	15.1697	0.431191	0.671697	0.870243	-5.76112
Q9P253	VPS18	INM:SMES	-0.065796	12.3834	-0.428522	0.6736	0.87219	-5.76223
Q8N392	ARHGAP18	INM:SMES	-0.0564825	14.5992	-0.427089	0.674624	0.872345	-5.76282
Q6ZVK8	NUDT18	INM:SMES	-0.100325	11.0873	-0.426801	0.67483	0.872345	-5.76293
P03905	ND4	INM:SMES	0.12533	10.2987	0.426227	0.67524	0.872345	-5.76317
Q16777	H2AC20	INM:SMES	-0.125232	9.7118	-0.425965	0.675427	0.872345	-5.76328
Q9UKE5	TNIK	INM:SMES	0.120819	14.1219	0.425078	0.676061	0.872345	-5.76364
P41236	PPP1R2	INM:SMES	-0.075049	13.124	-0.424985	0.676127	0.872345	-5.76368
Q13530	SERINC3	INM:SMES	-0.0692987	14.0006	-0.423463	0.677216	0.873231	-5.7643
O14672	ADAM10	INM:SMES	-0.0449744	15.9268	-0.421445	0.678661	0.874575	-5.76512
Q6NUM6	TYW1B	INM:SMES	-0.0624006	13.647	-0.420876	0.679068	0.874582	-5.76535
P0DMV8	HSPA1A	INM:SMES	-0.0544402	17.0323	-0.419564	0.680009	0.874838	-5.76588
Q9BUR5	APOO	INM:SMES	0.106889	10.5503	0.419476	0.680072	0.874838	-5.76592
Q6NZY4	ZCCHC8	INM:SMES	-0.0681507	13.725	-0.417577	0.681434	0.875115	-5.76668
Q86WT1	IFT70A	INM:SMES	-0.198325	11.8824	-0.417399	0.681561	0.875115	-5.76675
P11717	IGF2R	INM:SMES	-0.0486957	15.3377	-0.417374	0.681579	0.875115	-5.76676
P50851	LRBA	INM:SMES	-0.105904	11.848	-0.416931	0.681897	0.875115	-5.76694
P19525	EIF2AK2	INM:SMES	-0.0644331	12.0285	-0.416328	0.682329	0.875153	-5.76718
P56282	POLE2	INM:SMES	-0.250774	14.2521	-0.415251	0.683103	0.875167	-5.76761
Q9Y5K6	CD2AP	INM:SMES	-0.105258	11.2002	-0.415192	0.683145	0.875167	-5.76763
P43490	NAMPT	INM:SMES	0.0640264	18.2443	0.413183	0.684589	0.875323	-5.76844
P34897	SHMT2	INM:SMES	-0.119964	12.5529	-0.413052	0.684682	0.875323	-5.76849
P35612	ADD2	INM:SMES	-0.124512	11.0736	-0.412909	0.684785	0.875323	-5.76854
Q14204	DYNC1H1	INM:SMES	0.0459996	15.2909	0.41278	0.684878	0.875323	-5.7686
P07355	ANXA2	INM:SMES	-0.125643	13.2274	-0.412021	0.685424	0.875507	-5.7689
Q4G176	ACSF3	INM:SMES	0.109826	10.4199	0.410084	0.686818	0.876049	-5.76966
P19971	TYMP	INM:SMES	-0.0526856	13.899	-0.409227	0.687435	0.876049	-5.77
Q8NF50	DOCK8	INM:SMES	-0.0434796	14.7208	-0.409102	0.687524	0.876049	-5.77005
Q03252	LMNB2	INM:SMES	0.0537884	15.1715	0.408317	0.68809	0.876049	-5.77036
P48506	GCLC	INM:SMES	0.075869	12.6514	0.408293	0.688107	0.876049	-5.77037
L0R6Q1		INM:SMES	-0.0600326	14.5492	-0.408071	0.688267	0.876049	-5.77045
Q9UBR5	CKLF	INM:SMES	0.0755792	15.1186	0.406755	0.689215	0.876384	-5.77097
O15054	KDM6B	INM:SMES	-0.0991991	11.1221	-0.406175	0.689633	0.876384	-5.7712
Q86UP2	KTN1	INM:SMES	-0.118977	11.967	-0.406027	0.68974	0.876384	-5.77126
P48556	PSMD8	INM:SMES	-0.0541493	14.1185	-0.404705	0.690693	0.876852	-5.77177
P54709	ATP1B3	INM:SMES	-0.0513457	14.4482	-0.403455	0.691595	0.876852	-5.77226
Q15052	ARHGEF6	INM:SMES	-0.0575672	14.0311	-0.403041	0.691894	0.876852	-5.77242
Q9H2U2	PPA2	INM:SMES	0.110843	13.5583	0.402495	0.692288	0.876852	-5.77263
P02787	TF	INM:SMES	0.049587	13.6126	0.402492	0.69229	0.876852	-5.77263
Q96S44	TP53RK	INM:SMES	-0.0989372	13.0271	-0.401224	0.693206	0.876852	-5.77312
Q9BX95	SGPP1	INM:SMES	-0.1245	11.7215	-0.400728	0.693565	0.876852	-5.77331
Q5TFQ8	SIRPB1	INM:SMES	-0.119504	13.4833	-0.399737	0.694281	0.876852	-5.77369
O15533	TAPBP	INM:SMES	-0.0887534	12.4516	-0.399695	0.694311	0.876852	-5.77371
Q9Y4Z0	LSM4	INM:SMES	-0.060386	13.1818	-0.399542	0.694422	0.876852	-5.77377
Q00722	PLCB2	INM:SMES	-0.0722451	15.3794	-0.399373	0.694544	0.876852	-5.77383
Q6DD87	ZNF787	INM:SMES	-0.04852	13.1623	-0.39848	0.695189	0.877157	-5.77418
O75116	ROCK2	INM:SMES	0.0790313	13.4422	0.39749	0.695906	0.877408	-5.77456
O95573	ACSL3	INM:SMES	-0.0786553	11.3963	-0.396901	0.696332	0.877408	-5.77478
P15924	DSP	INM:SMES	-0.101902	13.1953	-0.396247	0.696806	0.877408	-5.77503
Q6ZSR9		INM:SMES	-0.0614228	13.833	-0.395326	0.697472	0.877408	-5.77538
Q8WXI4	ACOT11	INM:SMES	0.141886	11.5983	0.395255	0.697524	0.877408	-5.77541
Q7Z6I6	ARHGAP30	INM:SMES	0.081925	13.0683	0.39486	0.69781	0.877408	-5.77556
P04083	ANXA1	INM:SMES	-0.0841305	15.929	-0.393911	0.698497	0.877764	-5.77592
Q99459	CDC5L	INM:SMES	-0.0787641	14.6874	-0.393284	0.698952	0.877828	-5.77616
Q9Y224	RTRAF	INM:SMES	0.0895213	13.0471	0.391677	0.700117	0.878784	-5.77677
P52888	THOP1	INM:SMES	0.0757144	12.8972	0.39108	0.70055	0.878821	-5.77699
Q92575	UBXN4	INM:SMES	0.0988052	12.1475	0.390497	0.700973	0.878844	-5.77721
P20160	AZU1	INM:SMES	-0.0826592	20.1705	-0.389419	0.701755	0.879317	-5.77762
Q5VSL9	STRIP1	INM:SMES	-0.0928384	12.5257	-0.388531	0.7024	0.879619	-5.77795
O75019	LILRA1	INM:SMES	-0.0596737	15.084	-0.38722	0.703353	0.88027	-5.77844
Q96HS1	PGAM5	INM:SMES	0.112685	12.8389	0.38501	0.704959	0.88027	-5.77926
Q15428	SF3A2	INM:SMES	-0.107371	13.8475	-0.384746	0.705151	0.88027	-5.77936
Q6P2Q9	PRPF8	INM:SMES	0.0439913	14.4697	0.384551	0.705293	0.88027	-5.77943
P17858	PFKL	INM:SMES	0.045224	15.3267	0.384537	0.705303	0.88027	-5.77944
Q03188	CENPC	INM:SMES	0.114036	12.7723	0.384209	0.705542	0.88027	-5.77956
Q13620	CUL4B	INM:SMES	0.0940055	12.8961	0.383916	0.705755	0.88027	-5.77966
P84103	SRSF3	INM:SMES	0.0875397	15.2533	0.382674	0.706659	0.88084	-5.78012
P08238	HSP90AB1	INM:SMES	-0.0542295	18.3799	-0.380969	0.707901	0.88084	-5.78075
Q92522	H1-10	INM:SMES	0.0942347	13.7896	0.380304	0.708385	0.88084	-5.78099
Q16186	ADRM1	INM:SMES	0.125722	11.117	0.380113	0.708524	0.88084	-5.78106
Q8WUM0	NUP133	INM:SMES	-0.0584498	14.6951	-0.380039	0.708578	0.88084	-5.78109
Q7Z6Z7	HUWE1	INM:SMES	0.0739978	11.8803	0.379693	0.708831	0.88084	-5.78122
P15309	ACP3	INM:SMES	-0.0821027	12.4784	-0.3792	0.70919	0.88084	-5.7814
P07332	FES	INM:SMES	-0.0795342	14.0881	-0.378839	0.709453	0.88084	-5.78153
Q96HN2	AHCYL2	INM:SMES	0.0754061	13.1855	0.376141	0.711421	0.882686	-5.78251
P20292	ALOX5AP	INM:SMES	-0.110721	15.8474	-0.375688	0.711752	0.882686	-5.78268
O75592	MYCBP2	INM:SMES	0.0560098	12.4508	0.374514	0.712609	0.883245	-5.7831
Q969J3	BORCS5	INM:SMES	0.051778	13.4991	0.373895	0.713061	0.883302	-5.78332
Q7Z4Q2	HEATR3	INM:SMES	-0.0856967	14.7262	-0.372551	0.714043	0.88353	-5.78381
P33121	ACSL1	INM:SMES	-0.0439613	14.6108	-0.37253	0.714058	0.88353	-5.78382
Q9H0Q0	CYRIA	INM:SMES	0.0673843	13.6942	0.370753	0.715358	0.883662	-5.78445
Q9NR19	ACSS2	INM:SMES	-0.0621614	12.3752	-0.370629	0.715448	0.883662	-5.7845
O43426	SYNJ1	INM:SMES	-0.127717	11.5219	-0.370566	0.715494	0.883662	-5.78452
Q5VWQ0	RSBN1	INM:SMES	0.117409	10.423	0.369261	0.716449	0.883662	-5.78498
P42167	TMPO	INM:SMES	-0.0547423	15.8042	-0.368742	0.716829	0.883662	-5.78517
P61604	HSPE1	INM:SMES	0.0859576	16.3989	0.367302	0.717883	0.883662	-5.78568
Q6IQ22	RAB12	INM:SMES	-0.0939054	18.5674	-0.367263	0.717912	0.883662	-5.78569
P49792	RANBP2	INM:SMES	-0.0570476	13.1952	-0.367254	0.717918	0.883662	-5.7857
O15144	ARPC2	INM:SMES	0.103327	14.9981	0.367128	0.718011	0.883662	-5.78574
P07814	EPRS1	INM:SMES	0.0644615	12.6519	0.366829	0.71823	0.883662	-5.78585
Q9H3N1	TMX1	INM:SMES	-0.0447283	15.8868	-0.363476	0.720687	0.886185	-5.78703
Q9BVA1	TUBB2B	INM:SMES	-0.0409493	14.6294	-0.361551	0.7221	0.887107	-5.7877
P48448		INM:SMES	-0.0836268	17.1836	-0.360913	0.722568	0.887107	-5.78792
Q05823	RNASEL	INM:SMES	-0.0772199	10.9091	-0.36077	0.722673	0.887107	-5.78797
P19367	HK1	INM:SMES	-0.110167	12.7461	-0.36023	0.72307	0.887107	-5.78816
O00764	PDXK	INM:SMES	-0.10111	13.1171	-0.359195	0.72383	0.887539	-5.78852
P46976	GYG1	INM:SMES	0.0824876	14.0297	0.354718	0.727122	0.891073	-5.79006
Q9BXS9	SLC26A6	INM:SMES	0.0694609	17.2798	0.352847	0.728499	0.892174	-5.7907
P01024	C3	INM:SMES	-0.0450949	13.2954	-0.352382	0.728842	0.892174	-5.79086
P46734	MAP2K3	INM:SMES	-0.0426594	14.4943	-0.348741	0.731525	0.894229	-5.79209
P41218	MNDA	INM:SMES	-0.188344	14.5267	-0.348129	0.731976	0.894229	-5.7923
P24752	ACAT1	INM:SMES	0.119154	13.1799	0.347809	0.732212	0.894229	-5.7924
P35637	FUS	INM:SMES	0.0928493	11.2222	0.346679	0.733046	0.894229	-5.79278
P62310	LSM3	INM:SMES	0.0702248	13.5456	0.346577	0.733122	0.894229	-5.79282
Q8TCJ2	STT3B	INM:SMES	0.0514855	14.7738	0.346222	0.733384	0.894229	-5.79293
Q6NS38	ALKBH2	INM:SMES	-0.0936279	11.6713	-0.345577	0.73386	0.894229	-5.79315
Q9BUP3	HTATIP2	INM:SMES	0.0841862	13.6765	0.345104	0.734209	0.894229	-5.79331
P61421	ATP6V0D1	INM:SMES	0.0608731	14.9574	0.345087	0.734222	0.894229	-5.79331
P13727	PRG2	INM:SMES	0.165246	15.2674	0.343726	0.735227	0.894951	-5.79377
Q5JTZ9	AARS2	INM:SMES	0.0874601	11.7515	0.343058	0.735721	0.895051	-5.79399
P00505	GOT2	INM:SMES	-0.0861804	12.9716	-0.341784	0.736663	0.895315	-5.79441
Q5T1M5	FKBP15	INM:SMES	-0.0813141	12.413	-0.34165	0.736761	0.895315	-5.79445
Q9C0E2	XPO4	INM:SMES	-0.0660546	12.9047	-0.339705	0.7382	0.896562	-5.79509
Q969T9	WBP2	INM:SMES	0.0927631	12.8639	0.337022	0.740186	0.897535	-5.79597
P0C0S5	H2AZ1	INM:SMES	-0.0627994	15.8936	-0.336992	0.740208	0.897535	-5.79598
Q9BYM8	RBCK1	INM:SMES	-0.0913004	12.2896	-0.33695	0.74024	0.897535	-5.79599
P61244	MAX	INM:SMES	0.13444	11.5443	0.336291	0.740728	0.897626	-5.79621
Q8WW43	APH1B	INM:SMES	-0.0980364	11.3056	-0.333701	0.742647	0.899451	-5.79704
P02768	ALB	INM:SMES	-0.0677588	16.4614	-0.332014	0.743899	0.900465	-5.79759
Q12904	AIMP1	INM:SMES	-0.0928394	11.3094	-0.330678	0.74489	0.900838	-5.79801
Q53GS9	USP39	INM:SMES	0.0787629	12.1644	0.329977	0.745411	0.900838	-5.79824
P61163	ACTR1A	INM:SMES	-0.0524515	15.6856	-0.329702	0.745614	0.900838	-5.79832
Q14997	PSME4	INM:SMES	-0.12604	11.2425	-0.329366	0.745864	0.900838	-5.79843
P30038	ALDH4A1	INM:SMES	-0.0728004	13.0862	-0.328294	0.74666	0.901299	-5.79877
P49773	HINT1	INM:SMES	0.114916	11.9332	0.327557	0.747208	0.901444	-5.79901
P51610	HCFC1	INM:SMES	0.0776714	11.5196	0.327016	0.74761	0.901444	-5.79918
P48595	SERPINB10	INM:SMES	-0.0456613	15.2338	-0.32514	0.749005	0.902625	-5.79977
Q15075	EEA1	INM:SMES	-0.0671564	13.0616	-0.323526	0.750205	0.903571	-5.80027
Q5EBM0	CMPK2	INM:SMES	0.0968268	13.5511	0.321218	0.751923	0.905139	-5.80099
P07602	PSAP	INM:SMES	-0.0352596	17.1632	-0.319857	0.752938	0.905858	-5.80141
Q14240	EIF4A2	INM:SMES	-0.0785559	11.892	-0.318563	0.753901	0.906141	-5.80181
Q9H9S4	CAB39L	INM:SMES	0.0499603	12.2666	0.318422	0.754006	0.906141	-5.80186
Q14980	NUMA1	INM:SMES	-0.0419176	16.7222	-0.316287	0.755598	0.907279	-5.80251
O95571	ETHE1	INM:SMES	0.0478417	13.6476	0.316034	0.755787	0.907279	-5.80259
Q13137	CALCOCO2	INM:SMES	-0.054346	13.13	-0.314579	0.756873	0.908081	-5.80303
Q15435	PPP1R7	INM:SMES	-0.0615501	12.4922	-0.312028	0.758778	0.909864	-5.8038
Q96RQ3	MCCC1	INM:SMES	0.0637572	13.1714	0.310167	0.760168	0.910788	-5.80436
O96011	PEX11B	INM:SMES	0.0633391	12.6946	0.309568	0.760616	0.910788	-5.80454
P07339	CTSD	INM:SMES	-0.0327213	15.3359	-0.309315	0.760805	0.910788	-5.80462
Q15022	SUZ12	INM:SMES	0.0976271	12.9882	0.306976	0.762555	0.912117	-5.80532
Q8WVJ2	NUDCD2	INM:SMES	0.0793605	11.4601	0.3055	0.763659	0.912117	-5.80575
Q9UHV9	PFDN2	INM:SMES	-0.04619	13.7656	-0.305138	0.76393	0.912117	-5.80586
P01857		INM:SMES	-0.0451861	17.1156	-0.304635	0.764307	0.912117	-5.80601
Q9UIJ7	AK3	INM:SMES	0.0842138	13.421	0.30413	0.764685	0.912117	-5.80616
Q71UM5	RPS27L	INM:SMES	-0.106159	11.8454	-0.302817	0.765668	0.912117	-5.80654
Q9Y265	RUVBL1	INM:SMES	-0.0340295	16.1482	-0.302637	0.765803	0.912117	-5.80659
P31948	STIP1	INM:SMES	0.0430294	15.8022	0.302382	0.765994	0.912117	-5.80667
Q8TD19	NEK9	INM:SMES	0.0599422	11.6482	0.301981	0.766295	0.912117	-5.80679
Q8TE02	ELP5	INM:SMES	-0.061555	12.2361	-0.301856	0.766389	0.912117	-5.80682
Q9H270	VPS11	INM:SMES	-0.0445933	13.0556	-0.301667	0.766531	0.912117	-5.80688
Q5VW32	BROX	INM:SMES	-0.0583851	12.5313	-0.29975	0.767967	0.912987	-5.80743
Q9NZN3	EHD3	INM:SMES	-0.0631503	12.3149	-0.299571	0.768102	0.912987	-5.80749
Q96F07	CYFIP2	INM:SMES	0.0686049	14.2982	0.298736	0.768728	0.913232	-5.80773
Q10567	AP1B1	INM:SMES	-0.0389396	13.4078	-0.292186	0.773647	0.918574	-5.8096
P78347	GTF2I	INM:SMES	0.0443445	12.7633	0.290455	0.774948	0.918909	-5.81009
Q9BPX6	MICU1	INM:SMES	-0.0916363	11.2991	-0.289324	0.775799	0.918909	-5.8104
P09326	CD48	INM:SMES	0.0765627	12.7308	0.289197	0.775895	0.918909	-5.81044
P53621	COPA	INM:SMES	-0.0553411	14.3247	-0.288675	0.776288	0.918909	-5.81059
P12429	ANXA3	INM:SMES	-0.0770684	13.8261	-0.288594	0.776348	0.918909	-5.81061
A0MZ66	SHTN1	INM:SMES	-0.0710892	11.9238	-0.288438	0.776466	0.918909	-5.81065
Q9ULC5	ACSL5	INM:SMES	-0.0594693	12.7253	-0.28637	0.778023	0.920251	-5.81123
P78371	CCT2	INM:SMES	-0.0525099	14.1917	-0.282681	0.780802	0.922527	-5.81224
P00568	AK1	INM:SMES	0.0683771	13.0524	0.282302	0.781087	0.922527	-5.81235
P05091	ALDH2	INM:SMES	0.0424222	15.3964	0.281956	0.781349	0.922527	-5.81244
Q9BSL1	UBAC1	INM:SMES	0.0531708	14.1405	0.280854	0.782179	0.922527	-5.81274
Q8N1F8	STK11IP	INM:SMES	0.0438573	11.8801	0.280487	0.782457	0.922527	-5.81284
P55055	NR1H2	INM:SMES	0.0408188	12.2168	0.280439	0.782493	0.922527	-5.81285
P41091	EIF2S3	INM:SMES	0.047058	13.2304	0.279022	0.783562	0.923287	-5.81324
O95865	DDAH2	INM:SMES	-0.0699704	11.3604	-0.276093	0.785773	0.923618	-5.81402
O95613	PCNT	INM:SMES	0.0369698	13.064	0.275995	0.785847	0.923618	-5.81405
P50991	CCT4	INM:SMES	0.0631477	14.1264	0.275736	0.786043	0.923618	-5.81412
Q9Y5M8	SRPRB	INM:SMES	-0.0393043	13.1506	-0.275492	0.786227	0.923618	-5.81418
P49959	MRE11	INM:SMES	0.0435931	11.5474	0.275443	0.786264	0.923618	-5.8142
Q96T51	RUFY1	INM:SMES	0.0593559	14.779	0.275273	0.786392	0.923618	-5.81424
O43150	ASAP2	INM:SMES	0.130126	11.1682	0.273647	0.787622	0.924562	-5.81467
P18754	RCC1	INM:SMES	-0.0898391	13.2337	-0.272737	0.78831	0.92487	-5.81491
P49023	PXN	INM:SMES	-0.0487998	14.5429	-0.270699	0.789851	0.926179	-5.81545
P28065	PSMB9	INM:SMES	-0.0759301	13.4246	-0.269867	0.790481	0.926418	-5.81567
Q9NRX2	MRPL17	INM:SMES	-0.0875851	11.935	-0.269192	0.790991	0.926516	-5.81584
Q14764	MVP	INM:SMES	0.0355866	15.647	0.268182	0.791756	0.926798	-5.81611
P26599	PTBP1	INM:SMES	-0.0642973	15.5539	-0.267748	0.792084	0.926798	-5.81622
P07996	THBS1	INM:SMES	-0.0593869	13.4831	-0.266757	0.792835	0.926807	-5.81648
Q15036	SNX17	INM:SMES	0.0396219	12.3396	0.266612	0.792944	0.926807	-5.81651
Q8IYJ3	SYTL1	INM:SMES	-0.0338204	15.3898	-0.265749	0.793598	0.926913	-5.81674
Q9NVK5	FGFR1OP2	INM:SMES	0.0415758	12.5764	0.265366	0.793888	0.926913	-5.81683
P49137	MAPKAPK2	INM:SMES	-0.039393	12.4448	-0.262202	0.796287	0.928827	-5.81764
Q16514	TAF12	INM:SMES	-0.0530784	12.3942	-0.262077	0.796381	0.928827	-5.81767
P07954	FH	INM:SMES	0.0654736	13.2564	0.25957	0.798283	0.930545	-5.81831
P50990	CCT8	INM:SMES	0.0428528	15.3937	0.258951	0.798753	0.930595	-5.81846
P04406	GAPDH	INM:SMES	0.0386721	13.2453	0.256381	0.800705	0.932368	-5.8191
Q16539	MAPK14	INM:SMES	0.0677971	14.4961	0.252916	0.803337	0.934619	-5.81996
P52272	HNRNPM	INM:SMES	-0.0412997	15.8648	-0.252595	0.803581	0.934619	-5.82004
Q96J02	ITCH	INM:SMES	0.0385367	12.3801	0.251403	0.804487	0.934619	-5.82033
P02794	FTH1	INM:SMES	-0.037343	12.4001	-0.251066	0.804744	0.934619	-5.82041
Q68D10	SPTY2D1	INM:SMES	0.0506128	14.402	0.250498	0.805176	0.934619	-5.82055
Q86X76	NIT1	INM:SMES	-0.04167	12.541	-0.250445	0.805217	0.934619	-5.82056
P30046	DDT	INM:SMES	-0.0584837	13.6935	-0.249458	0.805967	0.934757	-5.8208
Q9H7D0	DOCK5	INM:SMES	0.044127	14	0.248848	0.806431	0.934757	-5.82095
P13639	EEF2	INM:SMES	-0.0342645	14.9314	-0.248593	0.806626	0.934757	-5.82101
O43617	TRAPPC3	INM:SMES	-0.0560246	14.1972	-0.24728	0.807625	0.935417	-5.82132
P55160	NCKAP1L	INM:SMES	-0.0314251	16.9139	-0.24655	0.808181	0.935562	-5.8215
Q9H1C4	UNC93B1	INM:SMES	-0.0354795	12.8272	-0.245619	0.80889	0.935884	-5.82172
P37235	HPCAL1	INM:SMES	-0.0381199	12.2973	-0.243831	0.810253	0.936846	-5.82214
Q9BRZ2	TRIM56	INM:SMES	-0.0635501	13.6695	-0.24316	0.810763	0.936846	-5.8223
P12081	HARS1	INM:SMES	-0.0342393	13.263	-0.24193	0.811701	0.936846	-5.82259
Q9UBU6	FAM8A1	INM:SMES	0.0637447	12.3304	0.241778	0.811817	0.936846	-5.82263
Q15018	ABRAXAS2	INM:SMES	0.0360239	12.3243	0.241414	0.812095	0.936846	-5.82271
P62913	RPL11	INM:SMES	-0.0673834	13.5308	-0.241136	0.812307	0.936846	-5.82278
P41250	GARS1	INM:SMES	0.0377675	13.8627	0.240044	0.813139	0.937011	-5.82303
Q15393	SF3B3	INM:SMES	-0.0229714	15.009	-0.239818	0.813312	0.937011	-5.82308
Q14344	GNA13	INM:SMES	-0.045499	13.8763	-0.23626	0.816027	0.939232	-5.8239
P23786	CPT2	INM:SMES	-0.0452592	13.016	-0.236161	0.816103	0.939232	-5.82393
P20648	ATP4A	INM:SMES	-0.0524815	16.4631	-0.235583	0.816544	0.93924	-5.82406
O15294	OGT	INM:SMES	0.0838044	12.5284	0.23502	0.816974	0.93924	-5.82419
Q14161	GIT2	INM:SMES	0.110488	12.9336	0.233956	0.817787	0.939303	-5.82443
P61626	LYZ	INM:SMES	-0.0577574	16.8346	-0.233501	0.818134	0.939303	-5.82453
P53611	RABGGTB	INM:SMES	-0.0783118	11.5301	-0.232898	0.818595	0.939303	-5.82467
O15231	ZNF185	INM:SMES	0.0526424	11.6134	0.232685	0.818758	0.939303	-5.82472
Q99873	PRMT1	INM:SMES	-0.0488499	11.9079	-0.230074	0.820754	0.940523	-5.8253
P00480	OTC	INM:SMES	-0.0394716	12.5168	-0.229411	0.821261	0.940523	-5.82545
Q15418	RPS6KA1	INM:SMES	-0.032564	14.0564	-0.228832	0.821704	0.940523	-5.82558
Q9Y6K0	CEPT1	INM:SMES	-0.0471821	12.8699	-0.228765	0.821755	0.940523	-5.82559
P46940	IQGAP1	INM:SMES	-0.0299817	15.9298	-0.22794	0.822386	0.940523	-5.82578
O75663	TIPRL	INM:SMES	-0.0543489	12.6915	-0.227899	0.822417	0.940523	-5.82579
P09211	GSTP1	INM:SMES	0.0761685	14.753	0.227194	0.822957	0.940646	-5.82594
Q7L2E3	DHX30	INM:SMES	-0.0556955	11.058	-0.225999	0.823872	0.940884	-5.8262
P84095	RHOG	INM:SMES	0.0410993	17.4066	0.225425	0.824311	0.940884	-5.82633
P48735	IDH2	INM:SMES	0.0334278	14.9715	0.225225	0.824464	0.940884	-5.82637
Q9NQG5	RPRD1B	INM:SMES	0.0493099	12.8608	0.224648	0.824905	0.940894	-5.8265
O60749	SNX2	INM:SMES	0.0360666	12.4295	0.21877	0.829409	0.945535	-5.82776
Q969Q5	RAB24	INM:SMES	0.0592776	12.5153	0.217314	0.830526	0.945931	-5.82807
Q9H4A4	RNPEP	INM:SMES	-0.0425938	14.9253	-0.21708	0.830705	0.945931	-5.82812
Q9NP79	VTA1	INM:SMES	0.0391762	13.5795	0.216616	0.831061	0.945931	-5.82822
Q13098	GPS1	INM:SMES	0.0488689	11.7943	0.215818	0.831674	0.946132	-5.82838
Q92903	CDS1	INM:SMES	0.0354658	11.8762	0.215103	0.832222	0.946261	-5.82853
O94903	PLPBP	INM:SMES	0.0546604	11.9022	0.213334	0.83358	0.946882	-5.8289
P54819	AK2	INM:SMES	-0.0421033	15.356	-0.212694	0.834071	0.946882	-5.82903
Q9H4M9	EHD1	INM:SMES	0.0349618	17.1581	0.212462	0.834249	0.946882	-5.82908
P02792	FTL	INM:SMES	0.0582488	11.3408	0.212058	0.834559	0.946882	-5.82916
P12694	BCKDHA	INM:SMES	0.0428546	12.1414	0.211555	0.834946	0.946882	-5.82927
P28066	PSMA5	INM:SMES	0.0489622	14.173	0.210529	0.835734	0.947281	-5.82948
P51659	HSD17B4	INM:SMES	-0.041828	12.0668	-0.209751	0.836332	0.947465	-5.82964
P20700	LMNB1	INM:SMES	0.0357443	16.5713	0.208642	0.837184	0.947936	-5.82986
Q5VYY1	ANKRD22	INM:SMES	-0.0325805	14.2871	-0.207278	0.838232	0.948629	-5.83014
P51692	STAT5B	INM:SMES	-0.0338638	13.3	-0.204655	0.840249	0.950417	-5.83066
Q9H2D6	TRIOBP	INM:SMES	-0.0240692	13.5403	-0.200877	0.843156	0.953023	-5.8314
P26447	S100A4	INM:SMES	-0.0454556	14.1181	-0.19996	0.843862	0.953023	-5.83158
Q9Y6A5	TACC3	INM:SMES	-0.0320937	11.845	-0.199952	0.843868	0.953023	-5.83158
Q13797	ITGA9	INM:SMES	0.0496467	11.1595	0.19873	0.844809	0.953289	-5.83182
Q9P2J5	LARS1	INM:SMES	0.0606311	11.3232	0.198507	0.84498	0.953289	-5.83186
O15021	MAST4	INM:SMES	0.0526034	18.3755	0.197665	0.845629	0.953526	-5.83202
Q8NH03	OR2T3	INM:SMES	0.0629795	12.6924	0.196998	0.846143	0.953611	-5.83215
Q8NC96	NECAP1	INM:SMES	0.0473546	13.8516	0.194858	0.847792	0.953721	-5.83256
Q13561	DCTN2	INM:SMES	0.056483	14.338	0.194189	0.848307	0.953721	-5.83268
A7E2V4	ZSWIM8	INM:SMES	0.0453763	13.6619	0.193756	0.848641	0.953721	-5.83277
Q14BN4	SLMAP	INM:SMES	0.0441407	13.1013	0.193204	0.849067	0.953721	-5.83287
Q96EP5	DAZAP1	INM:SMES	-0.0282672	14.1172	-0.191948	0.850036	0.953721	-5.8331
O00244	ATOX1	INM:SMES	-0.0733554	11.1868	-0.191616	0.850291	0.953721	-5.83317
Q00535	CDK5	INM:SMES	0.0395014	13.9411	0.191614	0.850293	0.953721	-5.83317
O96006	ZBED1	INM:SMES	0.0309439	14.0337	0.191598	0.850306	0.953721	-5.83317
Q7L576	CYFIP1	INM:SMES	-0.0525438	11.1186	-0.191534	0.850354	0.953721	-5.83318
Q9BYE2	TMPRSS13	INM:SMES	-0.0711906	14.6709	-0.19118	0.850628	0.953721	-5.83325
Q6P1J9	CDC73	INM:SMES	-0.06289	11.1421	-0.190147	0.851425	0.9538	-5.83344
Q9UBU9	NXF1	INM:SMES	-0.0572713	13.001	-0.189378	0.852018	0.9538	-5.83358
P15428	HPGD	INM:SMES	0.0293819	20.756	0.189122	0.852216	0.9538	-5.83363
Q9HBF4	ZFYVE1	INM:SMES	-0.0408839	11.8007	-0.188461	0.852725	0.9538	-5.83375
Q9Y4F3	MARF1	INM:SMES	-0.0436997	11.2281	-0.187772	0.853257	0.9538	-5.83387
P53618	COPB1	INM:SMES	0.0229452	16.0962	0.187614	0.853379	0.9538	-5.8339
Q96Q15	SMG1	INM:SMES	-0.0457572	12.1178	-0.186256	0.854427	0.9538	-5.83415
P62834	RAP1A	INM:SMES	0.03642	14.4855	0.186115	0.854537	0.9538	-5.83417
Q96SB3	PPP1R9B	INM:SMES	-0.0345901	12.4037	-0.185184	0.855255	0.9538	-5.83434
Q9NRL3	STRN4	INM:SMES	0.0325557	12.383	0.184369	0.855885	0.9538	-5.83449
P81605	DCD	INM:SMES	-0.0734621	14.5693	-0.183845	0.85629	0.9538	-5.83458
P49903	SEPHS1	INM:SMES	-0.0339684	12.5258	-0.182982	0.856956	0.9538	-5.83473
Q9HAB8	PPCS	INM:SMES	0.052165	12.2471	0.18253	0.857305	0.9538	-5.83481
Q08945	SSRP1	INM:SMES	-0.0236003	14.7805	-0.181103	0.858408	0.9538	-5.83507
Q9BZQ8	NIBAN1	INM:SMES	0.0325708	13.6574	0.180878	0.858582	0.9538	-5.83511
O60825	PFKFB2	INM:SMES	0.0378863	14.0281	0.180794	0.858647	0.9538	-5.83512
P55899	FCGRT	INM:SMES	0.0558181	12.2198	0.180679	0.858735	0.9538	-5.83514
Q9BUV8	RAB5IF	INM:SMES	0.0300349	14.0005	0.180046	0.859225	0.9538	-5.83525
Q9HD15	SRA1	INM:SMES	0.0753458	9.90228	0.17961	0.859562	0.9538	-5.83533
P46934	NEDD4	INM:SMES	0.0914244	9.03293	0.179037	0.860005	0.9538	-5.83543
Q02224	CENPE	INM:SMES	0.0634438	11.2428	0.178468	0.860445	0.9538	-5.83553
O43920	NDUFS5	INM:SMES	0.032659	11.8454	0.178039	0.860777	0.9538	-5.8356
Q9NS69	TOMM22	INM:SMES	-0.0424252	10.975	-0.178023	0.860789	0.9538	-5.8356
Q9NZD8	SPG21	INM:SMES	0.0314144	13.2753	0.177318	0.861334	0.953918	-5.83572
P78318	IGBP1	INM:SMES	-0.0235711	13.902	-0.174178	0.863763	0.956121	-5.83626
Q8N684	CPSF7	INM:SMES	-0.0296237	12.8691	-0.172419	0.865125	0.956263	-5.83656
P06396	GSN	INM:SMES	0.0373353	19.3311	0.172378	0.865157	0.956263	-5.83656
O75146	HIP1R	INM:SMES	-0.0338846	14.3375	-0.172125	0.865352	0.956263	-5.83661
Q27J81	INF2	INM:SMES	0.0208797	13.7853	0.171739	0.865652	0.956263	-5.83667
P52907	CAPZA1	INM:SMES	-0.0750743	9.98809	-0.170005	0.866994	0.956319	-5.83696
P67870	CSNK2B	INM:SMES	0.0267877	14.1301	0.169779	0.867169	0.956319	-5.83699
A6NC98	CCDC88B	INM:SMES	0.0278212	14.0753	0.169181	0.867632	0.956319	-5.83709
O75340	PDCD6	INM:SMES	0.0374155	13.0579	0.168505	0.868155	0.956319	-5.8372
Q8N1S5	SLC39A11	INM:SMES	-0.0310328	13.9707	-0.16847	0.868183	0.956319	-5.83721
P42345	MTOR	INM:SMES	-0.0300507	12.9935	-0.168266	0.868341	0.956319	-5.83724
Q9BTW9	TBCD	INM:SMES	-0.0637234	11.9619	-0.167314	0.869079	0.956647	-5.8374
Q96RK4	BBS4	INM:SMES	0.0687908	12.7532	0.165816	0.870239	0.957439	-5.83764
O60216	RAD21	INM:SMES	-0.0233062	14.7816	-0.162661	0.872685	0.958764	-5.83814
Q9UKA4	AKAP11	INM:SMES	0.0301198	13.0405	0.162309	0.872958	0.958764	-5.8382
Q5JSH3	WDR44	INM:SMES	-0.0201138	14.1745	-0.161782	0.873367	0.958764	-5.83828
P60842	EIF4A1	INM:SMES	0.0314311	15.6527	0.160255	0.874551	0.958764	-5.83852
O96000	NDUFB10	INM:SMES	0.0394438	10.8584	0.159129	0.875425	0.958764	-5.83869
Q86VX2	COMMD7	INM:SMES	-0.0207128	13.3788	-0.15889	0.87561	0.958764	-5.83873
O15111	CHUK	INM:SMES	-0.0344766	12.5889	-0.158832	0.875655	0.958764	-5.83874
Q6ZUM4	ARHGAP27	INM:SMES	0.0239885	13.6339	0.158244	0.876111	0.958764	-5.83883
P35606	COPB2	INM:SMES	0.018911	15.5613	0.157871	0.876401	0.958764	-5.83889
Q8TD16	BICD2	INM:SMES	0.0693904	10.4771	0.157748	0.876496	0.958764	-5.83891
Q9NVJ2	ARL8B	INM:SMES	-0.0195356	17.9553	-0.157519	0.876674	0.958764	-5.83894
O95793	STAU1	INM:SMES	-0.0398109	12.1707	-0.1572	0.876922	0.958764	-5.83899
Q5D862	FLG2	INM:SMES	-0.0674178	10.5161	-0.156581	0.877402	0.958764	-5.83909
Q9UKT5	FBXO4	INM:SMES	-0.0421797	11.697	-0.156304	0.877617	0.958764	-5.83913
O60341	KDM1A	INM:SMES	0.021023	13.1265	0.155419	0.878304	0.958934	-5.83926
P62750	RPL23A	INM:SMES	-0.01943	12.9985	-0.154966	0.878655	0.958934	-5.83933
Q14974	KPNB1	INM:SMES	0.0317911	14.0334	0.153099	0.880105	0.959765	-5.83961
Q6PJT7	ZC3H14	INM:SMES	0.0254897	13.18	0.152388	0.880658	0.959765	-5.83971
P40227	CCT6A	INM:SMES	0.0210585	15.8546	0.151562	0.8813	0.959765	-5.83984
Q9Y6C9	MTCH2	INM:SMES	-0.0421038	13.1086	-0.151129	0.881636	0.959765	-5.8399
Q5SSJ5	HP1BP3	INM:SMES	-0.0308832	16.4787	-0.150475	0.882144	0.959765	-5.84
P09622	DLD	INM:SMES	0.0412618	11.069	0.149942	0.882558	0.959765	-5.84007
Q5VYS8	TUT7	INM:SMES	-0.0330328	11.4034	-0.149885	0.882602	0.959765	-5.84008
[truncated: 175 more rows]

## Sheet: INM_SMES_AR02
accession	gene_symbol	coef	logFC	AveExpr	t	P.Value	adj.P.Val	B
Q09028	RBBP4	INM:SMES:AR02	1.34716	13.1075	5.1007	8.62503e-05	0.111505	1.08991
O75844	ZMPSTE24	INM:SMES:AR02	-2.88833	12.5435	-5.01806	0.00010258	0.111505	0.962096
P00352	ALDH1A1	INM:SMES:AR02	-1.02653	12.3762	-4.51417	0.000299563	0.217084	0.160107
Q92504	SLC39A7	INM:SMES:AR02	1.37851	10.6176	3.95169	0.0010129	0.302466	-0.773299
Q16799	RTN1	INM:SMES:AR02	1.52863	11.6683	3.91697	0.0010925	0.302466	-0.831889
P84090	ERH	INM:SMES:AR02	1.15749	11.9033	3.86206	0.00123139	0.302466	-0.924701
O14974	PPP1R12A	INM:SMES:AR02	1.03795	12.506	3.85547	0.0012492	0.302466	-0.935851
Q7KZ85	SUPT6H	INM:SMES:AR02	-1.04027	13.9058	-3.85278	0.00125655	0.302466	-0.940407
Q08043	ACTN3	INM:SMES:AR02	0.856247	13.3321	3.7979	0.00141629	0.302466	-1.03339
P18621	RPL17	INM:SMES:AR02	-1.11011	14.2663	-3.76452	0.00152324	0.302466	-1.09003
Q8IWZ3	ANKHD1	INM:SMES:AR02	-1.69349	12.4994	-3.68909	0.00179558	0.302466	-1.21819
P11279	LAMP1	INM:SMES:AR02	-0.85104	16.0975	-3.68257	0.0018213	0.302466	-1.22928
Q71DI3	H3C14	INM:SMES:AR02	-0.797629	18.5772	-3.64989	0.00195582	0.302466	-1.28488
Q9P0M6	MACROH2A2	INM:SMES:AR02	-1.79328	12.5575	-3.60994	0.00213378	0.302466	-1.35289
Q68CP4	HGSNAT	INM:SMES:AR02	-1.17168	12.5477	-3.59535	0.00220276	0.302466	-1.37775
Q9UQC2	GAB2	INM:SMES:AR02	-1.53841	14.3069	-3.57547	0.00230026	0.302466	-1.41161
P25786	PSMA1	INM:SMES:AR02	0.693363	15.3509	3.5627	0.00236519	0.302466	-1.43337
P19474	TRIM21	INM:SMES:AR02	0.829255	12.9444	3.51359	0.00263222	0.315233	-1.51707
P48426	PIP4K2A	INM:SMES:AR02	0.722146	14.875	3.44177	0.00307744	0.315233	-1.63948
P10515	DLAT	INM:SMES:AR02	1.13423	14.0121	3.4291	0.00316343	0.315233	-1.66108
P25398	RPS12	INM:SMES:AR02	-0.671739	14.524	-3.42487	0.00319264	0.315233	-1.66829
P45880	VDAC2	INM:SMES:AR02	-1.98619	11.8204	-3.40436	0.00333817	0.315233	-1.70324
Q9Y3A6	TMED5	INM:SMES:AR02	0.828333	12.0209	3.36444	0.00364057	0.315233	-1.77126
Q02978	SLC25A11	INM:SMES:AR02	-1.17188	14.0947	-3.28191	0.00435402	0.315233	-1.91176
P08134	RHOC	INM:SMES:AR02	-1.49472	17.555	-3.25935	0.00457192	0.315233	-1.95011
Q9P0U4	CXXC1	INM:SMES:AR02	0.948803	13.2419	3.24671	0.00469875	0.315233	-1.97161
Q9Y5Y6	ST14	INM:SMES:AR02	0.765144	13.4323	3.23958	0.00477172	0.315233	-1.98372
Q9NTI5	PDS5B	INM:SMES:AR02	0.578109	13.2686	3.22197	0.00495692	0.315233	-2.01364
P49257	LMAN1	INM:SMES:AR02	-0.753236	14.5281	-3.21621	0.00501895	0.315233	-2.02341
Q9NYU1	UGGT2	INM:SMES:AR02	-1.77231	13.0829	-3.20171	0.00517867	0.315233	-2.04803
Q00839	HNRNPU	INM:SMES:AR02	0.789875	12.6153	3.18285	0.00539392	0.315233	-2.08004
Q16698	DECR1	INM:SMES:AR02	-0.705582	15.5853	-3.17956	0.00543237	0.315233	-2.08562
Q9H9B4	SFXN1	INM:SMES:AR02	0.749818	14.0642	3.17932	0.00543519	0.315233	-2.08603
O14602	EIF1AY	INM:SMES:AR02	0.496659	14.6748	3.17652	0.00546807	0.315233	-2.09077
Q9NXG0	CNTLN	INM:SMES:AR02	0.681975	13.2269	3.17426	0.00549478	0.315233	-2.0946
Q8WY22	BRI3BP	INM:SMES:AR02	0.743759	13.9131	3.17177	0.00552442	0.315233	-2.09883
A8MWD9		INM:SMES:AR02	-0.869516	14.251	-3.14891	0.0058035	0.315233	-2.13757
O75427	LRCH4	INM:SMES:AR02	0.619543	12.3068	3.1474	0.00582243	0.315233	-2.14013
Q9UP83	COG5	INM:SMES:AR02	0.752363	12.8175	3.12888	0.00605937	0.315233	-2.17149
Q9H773	DCTPP1	INM:SMES:AR02	0.586185	14.1298	3.1262	0.00609452	0.315233	-2.17603
Q96CX2	KCTD12	INM:SMES:AR02	0.7279	15.9993	3.11865	0.00619437	0.315233	-2.18881
Q96EP5	DAZAP1	INM:SMES:AR02	0.648494	14.1172	3.1138	0.0062593	0.315233	-2.19701
Q5THK1	PRR14L	INM:SMES:AR02	-2.0501	13.9963	-3.0888	0.00660512	0.315233	-2.23929
Q9NSK0	KLC4	INM:SMES:AR02	1.23286	10.3296	3.0631	0.00697993	0.315233	-2.28268
Q14123	PDE1C	INM:SMES:AR02	0.938719	12.6883	3.06301	0.00698132	0.315233	-2.28284
Q9GZP4	PITHD1	INM:SMES:AR02	0.715988	13.2406	3.06202	0.00699617	0.315233	-2.28451
Q6ZMI0	PPP1R21	INM:SMES:AR02	1.02853	12.2876	3.05541	0.00709603	0.315233	-2.29565
O15021	MAST4	INM:SMES:AR02	-1.1493	18.3755	-3.05377	0.00712105	0.315233	-2.29842
P02768	ALB	INM:SMES:AR02	-0.878895	16.4614	-3.04518	0.00725348	0.315233	-2.31291
P49792	RANBP2	INM:SMES:AR02	0.668489	13.1952	3.04305	0.00728672	0.315233	-2.3165
Q9Y263	PLAA	INM:SMES:AR02	0.735619	12.4913	3.03521	0.00741014	0.315233	-2.32971
Q15080	NCF4	INM:SMES:AR02	0.808492	14.0261	3.02676	0.00754562	0.315233	-2.34395
P62851	RPS25	INM:SMES:AR02	-1.05095	14.7853	-3.01821	0.00768507	0.315233	-2.35835
Q6UW68	TMEM205	INM:SMES:AR02	0.607582	12.8809	2.9849	0.00825262	0.31774	-2.41437
Q02252	ALDH6A1	INM:SMES:AR02	0.570613	13.299	2.97178	0.00848725	0.31774	-2.4364
P52948	NUP98	INM:SMES:AR02	0.534884	12.8874	2.96991	0.00852133	0.31774	-2.43955
Q14847	LASP1	INM:SMES:AR02	0.647173	12.8946	2.96686	0.00857699	0.31774	-2.44467
P57088	TMEM33	INM:SMES:AR02	-0.918201	12.8982	-2.95931	0.00871628	0.31774	-2.45734
Q9NRD1	FBXO6	INM:SMES:AR02	-0.758992	11.5364	-2.94006	0.00908156	0.31774	-2.4896
P0DOY2		INM:SMES:AR02	-0.6156	12.9518	-2.93867	0.0091085	0.31774	-2.49193
O15085	ARHGEF11	INM:SMES:AR02	1.09837	9.65088	2.93402	0.00919929	0.31774	-2.49973
O43566	RGS14	INM:SMES:AR02	-0.71273	13.1896	-2.93012	0.00927596	0.31774	-2.50625
P15153	RAC2	INM:SMES:AR02	-0.898139	16.8365	-2.92821	0.00931393	0.31774	-2.50946
Q86X10	RALGAPB	INM:SMES:AR02	0.530938	14.1592	2.90949	0.00969255	0.31774	-2.54077
Q9H1U4	MEGF9	INM:SMES:AR02	-0.604456	13.8129	-2.90504	0.00978465	0.31774	-2.5482
Q96EZ8	MCRS1	INM:SMES:AR02	0.739216	10.8796	2.90291	0.00982902	0.31774	-2.55176
O60888	CUTA	INM:SMES:AR02	-0.948594	13.0386	-2.89888	0.00991366	0.31774	-2.55849
Q8TAQ2	SMARCC2	INM:SMES:AR02	-0.651036	12.9898	-2.8963	0.00996826	0.31774	-2.56281
O00291	HIP1	INM:SMES:AR02	0.488466	13.9831	2.89084	0.0100847	0.31774	-2.57193
Q9BZL4	PPP1R12C	INM:SMES:AR02	0.638671	13.2553	2.87851	0.0103522	0.32151	-2.5925
P27816	MAP4	INM:SMES:AR02	-0.607881	14.0826	-2.86691	0.0106102	0.321593	-2.61183
P52597	HNRNPF	INM:SMES:AR02	0.510897	12.9584	2.85939	0.0107808	0.321593	-2.62436
P11586	MTHFD1	INM:SMES:AR02	0.606336	15.9162	2.85258	0.0109375	0.321593	-2.63569
Q9UJW0	DCTN4	INM:SMES:AR02	0.866657	13.3648	2.84763	0.0110528	0.321593	-2.64393
O14646	CHD1	INM:SMES:AR02	0.567621	14.0191	2.83759	0.0112902	0.321593	-2.66062
Q08722	CD47	INM:SMES:AR02	-1.02925	14.7107	-2.83369	0.0113838	0.321593	-2.6671
Q9HB07		INM:SMES:AR02	0.609928	11.9595	2.82987	0.0114762	0.321593	-2.67345
O00712	NFIB	INM:SMES:AR02	-0.760848	18.5227	-2.81878	0.0117486	0.321593	-2.69186
Q8NFA0	USP32	INM:SMES:AR02	0.829499	11.5824	2.79881	0.0122548	0.321593	-2.72497
A6NGU5		INM:SMES:AR02	-1.1101	12.9426	-2.79736	0.0122925	0.321593	-2.72738
P43034	PAFAH1B1	INM:SMES:AR02	0.802916	14.4309	2.79706	0.0123001	0.321593	-2.72786
Q04864	REL	INM:SMES:AR02	0.426146	14.1173	2.79681	0.0123066	0.321593	-2.72828
Q9BRR9	ARHGAP9	INM:SMES:AR02	0.420273	14.8679	2.7832	0.0126651	0.321593	-2.75081
A6NJG2	SOWAHD	INM:SMES:AR02	0.591708	12.7293	2.78113	0.0127206	0.321593	-2.75424
Q68DU8	KCTD16	INM:SMES:AR02	0.659177	14.3908	2.77244	0.0129557	0.321593	-2.76861
P25685	DNAJB1	INM:SMES:AR02	0.625125	15.5519	2.7712	0.0129895	0.321593	-2.77065
Q96N46	TTC14	INM:SMES:AR02	-0.748835	13.2585	-2.76903	0.013049	0.321593	-2.77424
P42331	ARHGAP25	INM:SMES:AR02	0.526569	15.3475	2.7679	0.01308	0.321593	-2.7761
Q1KMD3	HNRNPUL2	INM:SMES:AR02	0.57675	13.5611	2.76096	0.0132724	0.321593	-2.78755
P43686	PSMC4	INM:SMES:AR02	0.503827	15.3611	2.75691	0.013386	0.321593	-2.79423
Q9H1E5	TMX4	INM:SMES:AR02	-0.781338	15.0089	-2.75425	0.0134613	0.321593	-2.79864
Q3YEC7	RABL6	INM:SMES:AR02	-1.21671	12.0096	-2.73729	0.0139497	0.327559	-2.82658
B5ME19	EIF3CL	INM:SMES:AR02	-1.11854	13.0535	-2.73516	0.0140124	0.327559	-2.83009
Q9Y450	HBS1L	INM:SMES:AR02	0.720284	11.731	2.72809	0.0142219	0.328545	-2.84172
Q8TD84	DSCAML1	INM:SMES:AR02	0.431469	14.9857	2.72341	0.0143621	0.328545	-2.84941
P09493	TPM1	INM:SMES:AR02	0.96171	13.5883	2.71757	0.0145391	0.328545	-2.85901
P53396	ACLY	INM:SMES:AR02	0.500552	14.1886	2.71078	0.0147476	0.328545	-2.87017
P16278	GLB1	INM:SMES:AR02	0.541855	14.0946	2.69896	0.0151172	0.328545	-2.88957
Q9NPF4	OSGEP	INM:SMES:AR02	0.706007	12.7469	2.69043	0.0153896	0.328545	-2.90355
Q96SZ5	ADO	INM:SMES:AR02	0.845488	13.5431	2.68948	0.0154201	0.328545	-2.9051
P50502	ST13	INM:SMES:AR02	-1.20762	13.3722	-2.68665	0.0155115	0.328545	-2.90973
Q15172	PPP2R5A	INM:SMES:AR02	0.621409	14.4273	2.68523	0.0155578	0.328545	-2.91206
Q5SRE5	NUP188	INM:SMES:AR02	0.456025	17.1718	2.68088	0.0156999	0.328545	-2.91918
O00505	KPNA3	INM:SMES:AR02	0.490531	15.9715	2.68036	0.0157169	0.328545	-2.92003
Q96QK1	VPS35	INM:SMES:AR02	0.69961	14.2697	2.66926	0.0160858	0.328585	-2.93819
Q9Y5P4	CERT1	INM:SMES:AR02	0.685476	12.4049	2.6692	0.0160876	0.328585	-2.93829
Q01844	EWSR1	INM:SMES:AR02	0.52184	13.1056	2.66648	0.0161791	0.328585	-2.94273
P59535	TAS2R40	INM:SMES:AR02	-0.850882	14.4027	-2.66198	0.016332	0.328585	-2.95008
P78537	BLOC1S1	INM:SMES:AR02	0.477551	12.9697	2.65781	0.0164746	0.328585	-2.95689
P23588	EIF4B	INM:SMES:AR02	0.672179	12.9715	2.65282	0.0166469	0.329003	-2.96503
Q13596	SNX1	INM:SMES:AR02	0.631549	12.9019	2.6409	0.0170654	0.329043	-2.98446
Q96KQ4	PPP1R13B	INM:SMES:AR02	0.723101	13.1157	2.63747	0.017188	0.329043	-2.99006
P31930	UQCRC1	INM:SMES:AR02	-0.700535	13.9617	-2.63738	0.017191	0.329043	-2.9902
Q16873	LTC4S	INM:SMES:AR02	-0.785031	13.9015	-2.63511	0.0172723	0.329043	-2.99389
P28676	GCA	INM:SMES:AR02	-0.95211	15.7472	-2.63142	0.0174057	0.329043	-2.9999
P03905	ND4	INM:SMES:AR02	-1.0905	10.2987	-2.62238	0.0177361	0.330883	-3.01461
P30050	RPL12	INM:SMES:AR02	-1.11256	15.5339	-2.61717	0.0179289	0.330883	-3.02306
Q96I99	SUCLG2	INM:SMES:AR02	-0.732437	12.3578	-2.60736	0.0182981	0.330883	-3.03899
Q16630	CPSF6	INM:SMES:AR02	0.713908	14.2692	2.60649	0.0183311	0.330883	-3.0404
P61086	UBE2K	INM:SMES:AR02	1.29089	12.4814	2.60433	0.0184135	0.330883	-3.04391
Q96G03	PGM2	INM:SMES:AR02	0.764314	14.418	2.60426	0.0184162	0.330883	-3.04402
Q13564	NAE1	INM:SMES:AR02	0.65311	14.411	2.59821	0.0186485	0.33231	-3.05382
P17676	CEBPB	INM:SMES:AR02	0.555277	12.8632	2.58486	0.0191718	0.336554	-3.07544
P05362	ICAM1	INM:SMES:AR02	-0.799385	12.422	-2.5684	0.0198361	0.336554	-3.10204
Q6ZUJ8	PIK3AP1	INM:SMES:AR02	0.799376	10.7245	2.56482	0.0199834	0.336554	-3.10782
Q96I25	RBM17	INM:SMES:AR02	0.488675	13.9091	2.55812	0.0202619	0.336554	-3.11862
Q9BV40	VAMP8	INM:SMES:AR02	-0.768035	14.7714	-2.55693	0.0203115	0.336554	-3.12052
P62195	PSMC5	INM:SMES:AR02	0.444418	13.6726	2.5555	0.0203718	0.336554	-3.12284
P47897	QARS1	INM:SMES:AR02	0.545482	14.0859	2.55425	0.0204243	0.336554	-3.12485
O43747	AP1G1	INM:SMES:AR02	-0.647399	14.0771	-2.55424	0.0204246	0.336554	-3.12486
Q14457	BECN1	INM:SMES:AR02	0.660126	11.728	2.54785	0.0206961	0.336554	-3.13516
Q8WUU5	GATAD1	INM:SMES:AR02	0.600687	11.3013	2.54583	0.0207824	0.336554	-3.13841
Q96IJ6	GMPPA	INM:SMES:AR02	0.576851	13.4994	2.5412	0.0209818	0.336554	-3.14586
P0DN76	U2AF1	INM:SMES:AR02	0.848359	11.7916	2.53492	0.0212547	0.336554	-3.15594
Q9BQA1	WDR77	INM:SMES:AR02	0.59903	14.1577	2.53274	0.0213505	0.336554	-3.15944
P19338	NCL	INM:SMES:AR02	-1.2037	13.0244	-2.5315	0.0214054	0.336554	-3.16145
Q7Z3B4	NUP54	INM:SMES:AR02	-1.3157	14.2702	-2.53106	0.0214245	0.336554	-3.16214
Q13153	PAK1	INM:SMES:AR02	-0.658692	19.141	-2.53041	0.0214532	0.336554	-3.16318
Q4AC94	C2CD3	INM:SMES:AR02	0.880215	14.6282	2.52474	0.0217051	0.336554	-3.17229
P16435	POR	INM:SMES:AR02	0.866984	11.5114	2.5172	0.0220442	0.336554	-3.18437
P13797	PLS3	INM:SMES:AR02	0.595797	19.9542	2.50732	0.0224965	0.336554	-3.2002
P80188	LCN2	INM:SMES:AR02	-0.901206	16.3079	-2.50558	0.0225771	0.336554	-3.20298
P12236	SLC25A6	INM:SMES:AR02	-1.00047	13.3897	-2.503	0.0226968	0.336554	-3.2071
Q9HCE1	MOV10	INM:SMES:AR02	-0.653175	12.2074	-2.50148	0.0227678	0.336554	-3.20954
A2AJT9	BCLAF3	INM:SMES:AR02	0.909871	10.4023	2.49985	0.0228443	0.336554	-3.21215
Q93100	PHKB	INM:SMES:AR02	0.417717	15.2834	2.49804	0.0229292	0.336554	-3.21504
Q9UKV3	ACIN1	INM:SMES:AR02	0.520452	13.92	2.49581	0.0230343	0.336554	-3.2186
P20810	CAST	INM:SMES:AR02	0.515312	13.9877	2.49545	0.0230515	0.336554	-3.21918
Q96M27	PRRC1	INM:SMES:AR02	-0.584239	11.5745	-2.49513	0.0230665	0.336554	-3.21969
Q5SSJ5	HP1BP3	INM:SMES:AR02	-0.721312	16.4787	-2.48514	0.0235438	0.339972	-3.23563
Q14019	COTL1	INM:SMES:AR02	0.670365	12.3796	2.48327	0.0236338	0.339972	-3.23861
Q96AE4	FUBP1	INM:SMES:AR02	0.42392	17.5777	2.4801	0.0237881	0.339972	-3.24367
P11233	RALA	INM:SMES:AR02	-0.60432	14.2651	-2.47727	0.0239263	0.339972	-3.24818
Q8IUR0	TRAPPC5	INM:SMES:AR02	-0.978867	11.5643	-2.46478	0.0245451	0.3465	-3.26805
O00308	WWP2	INM:SMES:AR02	0.898279	11.86	2.45681	0.024948	0.349916	-3.28071
Q99571	P2RX4	INM:SMES:AR02	0.604663	12.1228	2.4524	0.0251739	0.350821	-3.28772
P42566	EPS15	INM:SMES:AR02	0.557471	13.3578	2.43997	0.0258198	0.35753	-3.30741
Q96T60	PNKP	INM:SMES:AR02	0.539246	13.3947	2.42991	0.0263545	0.362625	-3.32334
P43405	SYK	INM:SMES:AR02	-1.25043	14.8201	-2.42171	0.0267977	0.366404	-3.33629
Q96DT5	DNAH11	INM:SMES:AR02	1.3952	16.7405	2.41704	0.0270537	0.367592	-3.34367
O60306	AQR	INM:SMES:AR02	-0.776366	12.1406	-2.39949	0.0280347	0.374551	-3.37131
Q16576	RBBP7	INM:SMES:AR02	0.595471	13.1077	2.39461	0.0283134	0.374551	-3.37899
P10153	RNASE2	INM:SMES:AR02	0.530307	12.3921	2.39339	0.0283836	0.374551	-3.38091
Q13501	SQSTM1	INM:SMES:AR02	0.874706	12.053	2.39323	0.0283926	0.374551	-3.38115
O94804	STK10	INM:SMES:AR02	0.451008	14.633	2.38903	0.028635	0.374551	-3.38774
Q7KYR7	BTN2A1	INM:SMES:AR02	-0.747169	14.3606	-2.38684	0.0287623	0.374551	-3.39118
Q9HCE0	EPG5	INM:SMES:AR02	0.713512	11.8205	2.3801	0.0291571	0.374551	-3.40175
Q6ZU69	SPATA31F1	INM:SMES:AR02	-0.915861	13.971	-2.3786	0.0292456	0.374551	-3.4041
P14543	NID1	INM:SMES:AR02	-0.521315	15.1695	-2.37832	0.0292623	0.374551	-3.40454
O14950	MYL12A	INM:SMES:AR02	0.683305	17.3874	2.37788	0.0292887	0.374551	-3.40524
O43760	SYNGR2	INM:SMES:AR02	-0.786446	12.9437	-2.37214	0.0296301	0.376701	-3.41422
O43615	TIMM44	INM:SMES:AR02	-0.778595	11.3094	-2.36777	0.0298929	0.377833	-3.42106
P51553	IDH3G	INM:SMES:AR02	1.13279	10.7921	2.36428	0.0301042	0.378303	-3.42652
P13861	PRKAR2A	INM:SMES:AR02	0.578608	11.5751	2.36069	0.0303234	0.378868	-3.43214
Q9HC35	EML4	INM:SMES:AR02	0.623548	12.6296	2.35115	0.0309122	0.382075	-3.44702
Q6UXV4	APOOL	INM:SMES:AR02	-0.589392	12.5411	-2.35084	0.0309316	0.382075	-3.44751
P63010	AP2B1	INM:SMES:AR02	0.440627	13.9251	2.34119	0.0315386	0.386949	-3.46255
Q14653	IRF3	INM:SMES:AR02	0.460366	14.8589	2.33893	0.0316821	0.386949	-3.46606
P15498	VAV1	INM:SMES:AR02	0.496601	13.7522	2.33612	0.0318614	0.386965	-3.47042
Q9Y2X3	NOP58	INM:SMES:AR02	0.389802	15.3835	2.32506	0.032578	0.391112	-3.48762
Q9H2H8	PPIL3	INM:SMES:AR02	0.559079	14.776	2.32459	0.0326083	0.391112	-3.48834
Q16877	PFKFB4	INM:SMES:AR02	0.430743	14.6539	2.32255	0.0327426	0.391112	-3.49152
O14802	POLR3A	INM:SMES:AR02	-1.01635	19.0879	-2.31583	0.0331866	0.393516	-3.50192
O43292	GPAA1	INM:SMES:AR02	0.608816	12.895	2.31404	0.0333059	0.393516	-3.5047
P17987	TCP1	INM:SMES:AR02	0.53277	12.8462	2.30822	0.0336965	0.39598	-3.5137
Q9Y5S8	NOX1	INM:SMES:AR02	-0.735882	12.351	-2.30098	0.034189	0.399607	-3.5249
Q9Y496	KIF3A	INM:SMES:AR02	-0.392817	15.5811	-2.29746	0.0344304	0.400277	-3.53034
Q7Z3U7	MON2	INM:SMES:AR02	0.517389	11.5017	2.29301	0.0347383	0.400564	-3.53721
P63104	YWHAZ	INM:SMES:AR02	0.638805	18.1912	2.29178	0.0348237	0.400564	-3.5391
Q9Y5X0	SNX10	INM:SMES:AR02	1.07673	11.5015	2.28577	0.035244	0.403027	-3.54836
Q9UHD2	TBK1	INM:SMES:AR02	-0.839222	12.6853	-2.28344	0.0354085	0.403027	-3.55195
Q9BW19	KIFC1	INM:SMES:AR02	-0.576568	16.0578	-2.28063	0.0356078	0.403184	-3.55628
O75390	CS	INM:SMES:AR02	-0.53461	16.2361	-2.27713	0.0358573	0.403906	-3.56166
Q8IWB7	WDFY1	INM:SMES:AR02	0.833611	11.0043	2.26899	0.0364436	0.407041	-3.57416
Q9BVC6	TMEM109	INM:SMES:AR02	0.506494	13.2265	2.26721	0.0365732	0.407041	-3.57689
P04114	APOB	INM:SMES:AR02	-0.606956	13.8397	-2.26551	0.0366974	0.407041	-3.57951
P18124	RPL7	INM:SMES:AR02	-0.443139	15.9636	-2.2596	0.0371312	0.409575	-3.58856
P61289	PSME3	INM:SMES:AR02	0.680479	12.406	2.25729	0.0373026	0.409575	-3.59211
Q9H082	RAB33B	INM:SMES:AR02	-0.647463	14.1535	-2.25075	0.0377903	0.410924	-3.60211
Q9H939	PSTPIP2	INM:SMES:AR02	0.994082	10.9132	2.24628	0.0381276	0.410924	-3.60894
P20701	ITGAL	INM:SMES:AR02	-0.333944	16.7096	-2.24577	0.0381666	0.410924	-3.60973
P25098	GRK2	INM:SMES:AR02	0.370348	17.0234	2.23975	0.0386253	0.410924	-3.61892
P22307	SCP2	INM:SMES:AR02	-0.761557	13.6432	-2.23916	0.0386699	0.410924	-3.61981
P30049	ATP5F1D	INM:SMES:AR02	-0.700675	14.9592	-2.23838	0.0387302	0.410924	-3.62101
P28331	NDUFS1	INM:SMES:AR02	-0.645323	13.3019	-2.23814	0.0387486	0.410924	-3.62137
Q15269	PWP2	INM:SMES:AR02	0.415408	14.417	2.23454	0.039026	0.411461	-3.62686
P62191	PSMC1	INM:SMES:AR02	0.507389	14.4444	2.23258	0.0391778	0.411461	-3.62984
P08758	ANXA5	INM:SMES:AR02	0.464639	14.9321	2.22131	0.0400619	0.418724	-3.647
O14523	C2CD2L	INM:SMES:AR02	-0.420763	13.0177	-2.21689	0.0404137	0.41951	-3.65371
O75340	PDCD6	INM:SMES:AR02	-0.69571	13.0579	-2.21552	0.040523	0.41951	-3.65579
P61978	HNRNPK	INM:SMES:AR02	0.565292	18.4033	2.21125	0.0408664	0.421059	-3.66227
Q03518	TAP1	INM:SMES:AR02	-0.719056	13.1045	-2.19923	0.0418473	0.42495	-3.68047
Q9UET6	FTSJ1	INM:SMES:AR02	-1.11368	18.33	-2.19761	0.0419808	0.42495	-3.68292
Q9BSL1	UBAC1	INM:SMES:AR02	-0.587457	14.1405	-2.19417	0.042267	0.42495	-3.68813
P0DOX7		INM:SMES:AR02	0.925212	10.1066	2.19335	0.0423349	0.42495	-3.68936
Q5T4S7	UBR4	INM:SMES:AR02	0.323587	15.4477	2.19276	0.0423844	0.42495	-3.69026
P40939	HADHA	INM:SMES:AR02	-0.537092	14.0841	-2.19237	0.0424168	0.42495	-3.69084
Q15257	PTPA	INM:SMES:AR02	0.69402	12.3441	2.18847	0.0427438	0.426262	-3.69673
Q9HBR0	SLC38A10	INM:SMES:AR02	0.467582	13.3843	2.18412	0.0431114	0.426983	-3.7033
P25325	MPST	INM:SMES:AR02	-0.819082	11.5464	-2.18297	0.043209	0.426983	-3.70503
P08240	SRPRA	INM:SMES:AR02	-0.455736	12.4063	-2.17738	0.0436858	0.428503	-3.71344
P32942	ICAM3	INM:SMES:AR02	-1.04563	12.4358	-2.17655	0.043757	0.428503	-3.71469
O95202	LETM1	INM:SMES:AR02	-0.7682	12.5574	-2.17161	0.0441835	0.430739	-3.72212
O94979	SEC31A	INM:SMES:AR02	0.369193	13.1992	2.16481	0.0447769	0.432904	-3.73233
P36543	ATP6V1E1	INM:SMES:AR02	0.549425	13.4385	2.16119	0.0450961	0.432904	-3.73777
P50395	GDI2	INM:SMES:AR02	0.437171	16.0351	2.16068	0.0451413	0.432904	-3.73853
Q8WVV9	HNRNPLL	INM:SMES:AR02	0.617274	11.3154	2.15907	0.0452834	0.432904	-3.74094
Q9Y2I7	PIKFYVE	INM:SMES:AR02	0.67506	12.9576	2.15775	0.0454011	0.432904	-3.74293
P27701	CD82	INM:SMES:AR02	-0.711456	11.8379	-2.1516	0.0459503	0.435494	-3.75212
P22670	RFX1	INM:SMES:AR02	0.421995	13.4303	2.14694	0.0463716	0.435494	-3.7591
O75367	MACROH2A1	INM:SMES:AR02	-0.750388	15.3997	-2.14565	0.0464881	0.435494	-3.76102
Q13505	MTX1	INM:SMES:AR02	-0.665371	11.0635	-2.13855	0.0471377	0.435494	-3.77162
P07900	HSP90AA1	INM:SMES:AR02	0.43924	16.6698	2.138	0.0471888	0.435494	-3.77245
P24539	ATP5PB	INM:SMES:AR02	-0.391932	13.5971	-2.1353	0.0474376	0.435494	-3.77647
Q99627	COPS8	INM:SMES:AR02	0.458436	12.5762	2.13339	0.0476145	0.435494	-3.77931
P67809	YBX1	INM:SMES:AR02	1.03825	11.1894	2.13215	0.0477303	0.435494	-3.78117
Q9NRF8	CTPS2	INM:SMES:AR02	-0.563669	11.9881	-2.12905	0.0480194	0.435494	-3.78578
Q32MZ4	LRRFIP1	INM:SMES:AR02	0.440951	12.8254	2.12891	0.0480324	0.435494	-3.78599
P61224	RAP1B	INM:SMES:AR02	-1.25209	16.2997	-2.12773	0.0481428	0.435494	-3.78774
P30613	PKLR	INM:SMES:AR02	0.639045	18.9983	2.12313	0.0485761	0.435494	-3.79458
P40121	CAPG	INM:SMES:AR02	0.471492	15.2784	2.12282	0.0486057	0.435494	-3.79504
Q9NZN3	EHD3	INM:SMES:AR02	0.632801	12.3149	2.12264	0.0486226	0.435494	-3.79531
Q8N511	TMEM199	INM:SMES:AR02	0.501636	12.4199	2.12206	0.0486775	0.435494	-3.79617
P62266	RPS23	INM:SMES:AR02	-0.54036	13.9963	-2.11673	0.0491857	0.438183	-3.80409
Q5JTZ9	AARS2	INM:SMES:AR02	-0.762436	11.7515	-2.11469	0.0493812	0.438183	-3.80712
O75436	VPS26A	INM:SMES:AR02	-0.621654	13.474	-2.1077	0.0500563	0.442367	-3.81747
P0DME0	SETSIP	INM:SMES:AR02	0.680573	12.6122	2.09491	0.0513135	0.446802	-3.83637
Q14194	CRMP1	INM:SMES:AR02	0.42085	14.6312	2.09372	0.0514321	0.446802	-3.83813
Q9Y4G6	TLN2	INM:SMES:AR02	-0.488535	14.7543	-2.09085	0.0517194	0.446802	-3.84237
A2RUS2	DENND3	INM:SMES:AR02	-0.813419	12.1655	-2.08879	0.0519256	0.446802	-3.8454
Q14166	TTLL12	INM:SMES:AR02	0.385314	14.5377	2.08766	0.0520389	0.446802	-3.84706
O00192	ARVCF	INM:SMES:AR02	-0.468712	12.8513	-2.0807	0.0527449	0.446802	-3.85731
O15211	RGL2	INM:SMES:AR02	0.809292	11.076	2.08021	0.0527942	0.446802	-3.85802
P07477	PRSS1	INM:SMES:AR02	-0.543224	19.4846	-2.07913	0.0529048	0.446802	-3.85961
P60228	EIF3E	INM:SMES:AR02	-0.557408	13.5683	-2.07676	0.0531478	0.446802	-3.8631
Q6RW13	AGTRAP	INM:SMES:AR02	-0.589201	13.258	-2.07613	0.0532128	0.446802	-3.86403
Q13045	FLII	INM:SMES:AR02	0.333985	14.5243	2.07313	0.0535221	0.446802	-3.86843
Q5JPF3		INM:SMES:AR02	-0.780912	16.6876	-2.07264	0.0535723	0.446802	-3.86914
Q96HY6	DDRGK1	INM:SMES:AR02	0.456219	14.007	2.0699	0.0538561	0.446802	-3.87316
Q8NEZ4	KMT2C	INM:SMES:AR02	-0.743049	11.6856	-2.0691	0.0539394	0.446802	-3.87434
P99999	CYCS	INM:SMES:AR02	0.601116	16.4393	2.069	0.05395	0.446802	-3.87448
Q9BV20	MRI1	INM:SMES:AR02	-0.862813	10.074	-2.06352	0.0545236	0.446802	-3.88252
O60271	SPAG9	INM:SMES:AR02	0.452167	11.9188	2.06258	0.0546223	0.446802	-3.88389
Q92667	AKAP1	INM:SMES:AR02	0.402462	13.7147	2.06168	0.0547169	0.446802	-3.88521
Q15154	PCM1	INM:SMES:AR02	-0.364776	16.1182	-2.0589	0.0550106	0.446802	-3.88927
P10155	RO60	INM:SMES:AR02	0.654984	13.3183	2.05768	0.0551404	0.446802	-3.89106
P30040	ERP29	INM:SMES:AR02	-0.422758	14.3925	-2.05567	0.0553532	0.446802	-3.89398
O00178	GTPBP1	INM:SMES:AR02	-0.687147	15.1475	-2.0551	0.0554139	0.446802	-3.89482
P31942	HNRNPH3	INM:SMES:AR02	0.542134	14.5575	2.05465	0.0554621	0.446802	-3.89548
Q92530	PSMF1	INM:SMES:AR02	-0.776748	15.0034	-2.05439	0.0554906	0.446802	-3.89587
P46019	PHKA2	INM:SMES:AR02	0.39926	14.3778	2.05129	0.0558216	0.447809	-3.90038
Q9H9A6	LRRC40	INM:SMES:AR02	0.422343	12.0411	2.04686	0.0562993	0.447935	-3.90685
P62917	RPL8	INM:SMES:AR02	-0.697285	13.4938	-2.04049	0.0569921	0.447935	-3.91612
Q08379	GOLGA2	INM:SMES:AR02	0.652633	10.939	2.0373	0.0573419	0.447935	-3.92076
P16949	STMN1	INM:SMES:AR02	0.366578	18.4648	2.03412	0.0576927	0.447935	-3.92538
Q10567	AP1B1	INM:SMES:AR02	0.383356	13.4078	2.03402	0.0577045	0.447935	-3.92553
Q8WVC6	DCAKD	INM:SMES:AR02	-0.729839	18.2167	-2.03199	0.0579297	0.447935	-3.92848
A5A3E0	POTEF	INM:SMES:AR02	-0.953333	20.5858	-2.03183	0.0579472	0.447935	-3.92871
Q9NW15	ANO10	INM:SMES:AR02	0.443532	13.3591	2.03008	0.0581416	0.447935	-3.93125
P67936	TPM4	INM:SMES:AR02	0.835511	13.4895	2.03001	0.058149	0.447935	-3.93135
Q9BSJ8	ESYT1	INM:SMES:AR02	-0.722973	12.3497	-2.02937	0.0582211	0.447935	-3.93229
O15173	PGRMC2	INM:SMES:AR02	0.420269	15.0497	2.02889	0.0582741	0.447935	-3.93297
P53367	ARFIP1	INM:SMES:AR02	0.452263	13.4835	2.02857	0.0583099	0.447935	-3.93344
Q5JTV8	TOR1AIP1	INM:SMES:AR02	0.488528	14.8055	2.02652	0.0585387	0.44811	-3.93641
Q9UPT5	EXOC7	INM:SMES:AR02	0.384153	12.9753	2.02231	0.0590131	0.4496	-3.94252
Q6XQN6	NAPRT	INM:SMES:AR02	0.774984	11.5611	2.02112	0.059147	0.4496	-3.94423
Q9H3H3	C11orf68	INM:SMES:AR02	0.428549	14.0305	2.01058	0.0603509	0.455649	-3.95947
Q9H8H3	TMT1A	INM:SMES:AR02	-0.354036	13.6221	-2.01048	0.0603619	0.455649	-3.95961
P08631	HCK	INM:SMES:AR02	0.576664	14.3648	2.00863	0.0605751	0.455676	-3.96228
P61081	UBE2M	INM:SMES:AR02	0.411361	13.1349	2.00346	0.0611761	0.457344	-3.96974
P06702	S100A9	INM:SMES:AR02	0.52706	16.2819	2.00271	0.0612631	0.457344	-3.97081
O95169	NDUFB8	INM:SMES:AR02	0.449057	13.8933	2.0013	0.061428	0.457344	-3.97284
Q96QE3	ATAD5	INM:SMES:AR02	0.815946	13.914	1.99543	0.0621182	0.459417	-3.98128
P36222	CHI3L1	INM:SMES:AR02	0.481925	13.5087	1.99358	0.0623381	0.459417	-3.98395
Q9Y6D5	ARFGEF2	INM:SMES:AR02	0.550597	14.0911	1.99203	0.0625219	0.459417	-3.98617
Q9P107	GMIP	INM:SMES:AR02	0.503931	13.1947	1.9894	0.0628351	0.459417	-3.98994
Q8TF01	PNISR	INM:SMES:AR02	-0.607921	14.2755	-1.98846	0.0629477	0.459417	-3.99129
Q9UMS4	PRPF19	INM:SMES:AR02	0.586371	13.9542	1.98824	0.0629743	0.459417	-3.99161
O96005	CLPTM1	INM:SMES:AR02	0.627461	11.7961	1.9863	0.0632071	0.459573	-3.9944
P19823	ITIH2	INM:SMES:AR02	-0.847859	13.8819	-1.97883	0.0641095	0.464366	-4.00509
Q96RU7	TRIB3	INM:SMES:AR02	-0.942769	16.7488	-1.97655	0.0643876	0.464366	-4.00835
P05388	RPLP0	INM:SMES:AR02	0.519652	14.4218	1.97557	0.0645071	0.464366	-4.00975
Q9BS26	ERP44	INM:SMES:AR02	-0.622014	12.1484	-1.97088	0.0650829	0.464679	-4.01644
O95793	STAU1	INM:SMES:AR02	-0.705221	12.1707	-1.96907	0.0653072	0.464679	-4.01904
Q6UW02	CYP20A1	INM:SMES:AR02	1.01954	11.9404	1.96857	0.065368	0.464679	-4.01974
Q96IC2	REXO5	INM:SMES:AR02	0.575387	12.2561	1.96719	0.0655389	0.464679	-4.0217
Q7L5N7	LPCAT2	INM:SMES:AR02	-0.448936	15.5382	-1.96498	0.0658138	0.464679	-4.02485
Q96DZ1	ERLEC1	INM:SMES:AR02	-0.519073	11.4085	-1.96483	0.0658331	0.464679	-4.02508
Q8TEQ6	GEMIN5	INM:SMES:AR02	0.67904	12.31	1.96079	0.0663373	0.466723	-4.03082
P13010	XRCC5	INM:SMES:AR02	-0.315381	15.5246	-1.95786	0.0667067	0.467674	-4.035
Q16851	UGP2	INM:SMES:AR02	0.40564	16.8358	1.95474	0.0671012	0.467674	-4.03943
Q6PI48	DARS2	INM:SMES:AR02	-0.511639	11.6441	-1.9546	0.0671179	0.467674	-4.03962
Q8TBY0	RBM46	INM:SMES:AR02	0.478809	15.8088	1.95254	0.0673802	0.468002	-4.04255
P48960	ADGRE5	INM:SMES:AR02	-0.871625	11.3251	-1.94924	0.0678004	0.469421	-4.04723
Q9NYU2	UGGT1	INM:SMES:AR02	0.305484	15.3301	1.94755	0.0680177	0.46943	-4.04963
Q13435	SF3B2	INM:SMES:AR02	0.353025	15.2551	1.94203	0.0687284	0.471439	-4.05744
P17612	PRKACA	INM:SMES:AR02	0.5586	12.7561	1.94192	0.0687424	0.471439	-4.0576
P31946	YWHAB	INM:SMES:AR02	0.484359	16.5971	1.93655	0.0694417	0.473661	-4.0652
Q9UHG3	PCYOX1	INM:SMES:AR02	-0.452427	14.2927	-1.93499	0.0696461	0.473661	-4.0674
Q8N684	CPSF7	INM:SMES:AR02	-0.469641	12.8691	-1.93285	0.0699267	0.473661	-4.07042
Q13393	PLD1	INM:SMES:AR02	-0.662298	9.63661	-1.93123	0.0701391	0.473661	-4.0727
Q08945	SSRP1	INM:SMES:AR02	-0.35581	14.7805	-1.93068	0.0702119	0.473661	-4.07347
Q15542	TAF5	INM:SMES:AR02	-1.02944	11.7133	-1.92882	0.0704587	0.473661	-4.07611
Q9Y3F4	STRAP	INM:SMES:AR02	0.591317	11.1691	1.92595	0.0708383	0.473661	-4.08014
Q99735	MGST2	INM:SMES:AR02	-0.577774	15.9852	-1.92398	0.0711017	0.473661	-4.08292
P27635	RPL10	INM:SMES:AR02	-0.489835	14.1069	-1.92319	0.0712067	0.473661	-4.08403
P00747	PLG	INM:SMES:AR02	-0.569272	12.6859	-1.92142	0.0714439	0.473661	-4.08652
Q15942	ZYX	INM:SMES:AR02	0.363698	17.7386	1.92014	0.0716154	0.473661	-4.08832
P35606	COPB2	INM:SMES:AR02	0.32489	15.5613	1.91783	0.0719268	0.473661	-4.09157
Q53TN4	CYBRD1	INM:SMES:AR02	0.83819	15.7845	1.91773	0.0719394	0.473661	-4.0917
O95644	NFATC1	INM:SMES:AR02	-0.553628	12.2418	-1.91601	0.0721727	0.473661	-4.09412
Q9Y4E8	USP15	INM:SMES:AR02	-0.81111	12.0529	-1.91266	0.072627	0.473661	-4.09882
P08962	CD63	INM:SMES:AR02	-0.401017	16.0864	-1.91264	0.0726287	0.473661	-4.09884
O43175	PHGDH	INM:SMES:AR02	-0.490018	13.1354	-1.9116	0.0727703	0.473661	-4.1003
Q07960	ARHGAP1	INM:SMES:AR02	-1.25543	13.5256	-1.90775	0.0732965	0.475662	-4.1057
O75150	RNF40	INM:SMES:AR02	-0.594767	11.7527	-1.90495	0.073682	0.47674	-4.10962
P16401	H1-5	INM:SMES:AR02	-1.52315	15.0189	-1.90193	0.0740995	0.478019	-4.11385
Q99986	VRK1	INM:SMES:AR02	-1.05639	12.511	-1.89941	0.0744489	0.478261	-4.11737
Q13423	NNT	INM:SMES:AR02	-0.639465	15.418	-1.89699	0.0747862	0.478261	-4.12075
O75923	DYSF	INM:SMES:AR02	0.365484	16.1115	1.89185	0.0755061	0.478261	-4.12791
Q86VS8	HOOK3	INM:SMES:AR02	0.418471	13.7227	1.89132	0.0755807	0.478261	-4.12864
P69905	HBA1	INM:SMES:AR02	0.451801	16.5143	1.88861	0.0759633	0.478261	-4.13242
P17174	GOT1	INM:SMES:AR02	0.510477	14.0077	1.8884	0.075993	0.478261	-4.13271
P13637	ATP1A3	INM:SMES:AR02	-0.420507	13.8476	-1.88703	0.0761872	0.478261	-4.13462
Q9UJ70	NAGK	INM:SMES:AR02	0.659985	15.2318	1.88639	0.0762781	0.478261	-4.13551
Q8WWI5	SLC44A1	INM:SMES:AR02	-0.463499	10.7673	-1.8849	0.0764904	0.478261	-4.13758
P38606	ATP6V1A	INM:SMES:AR02	-0.558767	14.3574	-1.88388	0.076636	0.478261	-4.139
Q9NX76	CMTM6	INM:SMES:AR02	-0.79046	11.0997	-1.883	0.076761	0.478261	-4.14022
Q96QH2	PRAM1	INM:SMES:AR02	0.467536	14.8991	1.88194	0.0769129	0.478261	-4.14169
Q9Y2Z4	YARS2	INM:SMES:AR02	-1.03543	12.1392	-1.88003	0.0771869	0.478261	-4.14435
Q8NFU5	IPMK	INM:SMES:AR02	0.627272	15.5853	1.87982	0.077217	0.478261	-4.14464
Q9NP72	RAB18	INM:SMES:AR02	-0.304093	16.8458	-1.87478	0.0779436	0.47917	-4.15162
P43155	CRAT	INM:SMES:AR02	-0.524159	12.2866	-1.87375	0.0780929	0.47917	-4.15305
Q9H3U1	UNC45A	INM:SMES:AR02	-0.363117	13.7865	-1.8728	0.0782311	0.47917	-4.15437
Q5T2N8	ATAD3C	INM:SMES:AR02	-0.999901	14.7811	-1.8727	0.0782453	0.47917	-4.15451
Q9UBC2	EPS15L1	INM:SMES:AR02	0.43335	13.1543	1.86312	0.0796481	0.485102	-4.16775
Q92620	DHX38	INM:SMES:AR02	-0.55292	10.5439	-1.86304	0.0796603	0.485102	-4.16786
P62979	RPS27A	INM:SMES:AR02	-0.621667	12.6222	-1.86125	0.079925	0.485354	-4.17033
Q96FW1	OTUB1	INM:SMES:AR02	0.474237	13.4209	1.8593	0.0802149	0.485758	-4.17303
Q14289	PTK2B	INM:SMES:AR02	-0.753836	12.6457	-1.85537	0.0807995	0.486497	-4.17843
Q9BVA1	TUBB2B	INM:SMES:AR02	0.297107	14.6294	1.8549	0.0808704	0.486497	-4.17909
P61011	SRP54	INM:SMES:AR02	-0.918369	12.6039	-1.85398	0.0810082	0.486497	-4.18035
Q15907	RAB11B	INM:SMES:AR02	-0.418572	17.1443	-1.84942	0.0816936	0.489262	-4.18662
Q9H3Z4	DNAJC5	INM:SMES:AR02	0.618321	10.8559	1.84509	0.0823497	0.490488	-4.19257
O75019	LILRA1	INM:SMES:AR02	-0.402123	15.084	-1.84509	0.0823497	0.490488	-4.19257
Q86VR2	RETREG3	INM:SMES:AR02	0.739445	9.6925	1.84255	0.0827364	0.490918	-4.19605
Q8N1S5	SLC39A11	INM:SMES:AR02	-0.479759	13.9707	-1.84166	0.0828735	0.490918	-4.19728
Q92835	INPP5D	INM:SMES:AR02	0.313464	15.3949	1.83701	0.083586	0.493062	-4.20364
Q06330	RBPJ	INM:SMES:AR02	0.49968	13.1179	1.83463	0.0839538	0.493062	-4.2069
O75964	ATP5MG	INM:SMES:AR02	-0.635701	13.6723	-1.8339	0.0840671	0.493062	-4.2079
P57740	NUP107	INM:SMES:AR02	-0.340592	13.2188	-1.83341	0.0841427	0.493062	-4.20857
P55010	EIF5	INM:SMES:AR02	0.554591	11.1275	1.83143	0.0844506	0.493378	-4.21128
P43243	MATR3	INM:SMES:AR02	0.304239	14.5817	1.83014	0.0846505	0.493378	-4.21303
A1L390	PLEKHG3	INM:SMES:AR02	0.527533	11.9585	1.82106	0.0860754	0.50019	-4.22541
P40926	MDH2	INM:SMES:AR02	0.295464	17.4144	1.81977	0.0862794	0.50019	-4.22716
P03928	ATP8	INM:SMES:AR02	0.424882	12.9214	1.81544	0.0869683	0.502447	-4.23305
Q96SB8	SMC6	INM:SMES:AR02	0.502265	13.2566	1.81442	0.0871309	0.502447	-4.23444
Q9BZ95	NSD3	INM:SMES:AR02	-0.513813	13.888	-1.8083	0.088114	0.506772	-4.24274
O15347	HMGB3	INM:SMES:AR02	0.398684	16.806	1.80047	0.0893849	0.511	-4.25334
P11940	PABPC1	INM:SMES:AR02	-0.717084	14.0373	-1.80025	0.0894212	0.511	-4.25364
Q15286	RAB35	INM:SMES:AR02	-0.372822	18.1255	-1.79944	0.0895542	0.511	-4.25473
Q4V328	GRIPAP1	INM:SMES:AR02	0.575368	11.581	1.79681	0.0899846	0.511109	-4.25828
O00471	EXOC5	INM:SMES:AR02	0.658481	12.4751	1.79645	0.0900436	0.511109	-4.25876
P51003	PAPOLA	INM:SMES:AR02	-0.578597	11.9723	-1.78652	0.0916908	0.517366	-4.27215
P04066	FUCA1	INM:SMES:AR02	0.547658	12.1458	1.78352	0.0921934	0.517366	-4.27618
Q8IUE6	H2AC21	INM:SMES:AR02	-0.97212	14.0594	-1.78303	0.092275	0.517366	-4.27683
Q13136	PPFIA1	INM:SMES:AR02	0.336753	13.0956	1.78123	0.0925777	0.517366	-4.27925
Q9UKX3	MYH13	INM:SMES:AR02	0.421686	14.7397	1.7789	0.0929712	0.517366	-4.28238
Q7Z4V5	HDGFL2	INM:SMES:AR02	0.562362	14.8009	1.77768	0.0931777	0.517366	-4.28401
Q9UQ88	CDK11A	INM:SMES:AR02	0.506087	13.0306	1.77622	0.0934257	0.517366	-4.28597
P62873	GNB1	INM:SMES:AR02	-0.551045	15.6877	-1.77379	0.0938387	0.517366	-4.28922
Q02218	OGDH	INM:SMES:AR02	-0.610016	15.072	-1.77259	0.0940429	0.517366	-4.29082
P13073	COX4I1	INM:SMES:AR02	-0.601094	11.8043	-1.7681	0.0948143	0.517366	-4.29684
Q7Z392	TRAPPC11	INM:SMES:AR02	0.624258	11.3534	1.76801	0.0948286	0.517366	-4.29695
Q05655	PRKCD	INM:SMES:AR02	0.279479	15.8812	1.76769	0.0948835	0.517366	-4.29737
Q6ZUM4	ARHGAP27	INM:SMES:AR02	0.378672	13.6339	1.76633	0.0951177	0.517366	-4.29919
Q15428	SF3A2	INM:SMES:AR02	0.696005	13.8475	1.76355	0.0955997	0.517366	-4.30291
Q9P289	STK26	INM:SMES:AR02	0.371833	14.2199	1.76299	0.0956967	0.517366	-4.30365
Q5T1M5	FKBP15	INM:SMES:AR02	0.593012	12.413	1.76183	0.0958973	0.517366	-4.30519
P49916	LIG3	INM:SMES:AR02	0.547325	12.4657	1.75976	0.0962576	0.517366	-4.30795
O00170	AIP	INM:SMES:AR02	0.504804	12.5055	1.75952	0.0962994	0.517366	-4.30827
Q9NS15	LTBP3	INM:SMES:AR02	-0.788714	11.3994	-1.75849	0.0964803	0.517366	-4.30965
Q9NVR2	INTS10	INM:SMES:AR02	0.362665	12.9808	1.75798	0.0965689	0.517366	-4.31033
P52564	MAP2K6	INM:SMES:AR02	-0.690186	13.0528	-1.75782	0.0965966	0.517366	-4.31054
Q96Q11	TRNT1	INM:SMES:AR02	-0.514507	11.5916	-1.7574	0.0966708	0.517366	-4.3111
Q7LDG7	RASGRP2	INM:SMES:AR02	0.344515	13.5166	1.75421	0.097229	0.517366	-4.31533
Q9UEY8	ADD3	INM:SMES:AR02	0.398858	14.5457	1.75339	0.0973742	0.517366	-4.31643
Q15386	UBE3C	INM:SMES:AR02	0.425839	13.1851	1.75328	0.0973931	0.517366	-4.31657
Q9UHL4	DPP7	INM:SMES:AR02	0.292601	14.2477	1.75002	0.0979682	0.517366	-4.3209
Q9Y3I0	RTCB	INM:SMES:AR02	0.461703	14.5209	1.74999	0.0979747	0.517366	-4.32095
Q00610	CLTC	INM:SMES:AR02	0.355012	14.3962	1.74816	0.0982992	0.517366	-4.32337
A6QL63	ABTB3	INM:SMES:AR02	0.558447	13.0535	1.74723	0.0984633	0.517366	-4.3246
Q99460	PSMD1	INM:SMES:AR02	-0.428721	13.2652	-1.74656	0.0985839	0.517366	-4.3255
P17980	PSMC3	INM:SMES:AR02	0.42684	13.0059	1.74588	0.0987044	0.517366	-4.32639
P24158	PRTN3	INM:SMES:AR02	0.466844	22.3162	1.74556	0.0987611	0.517366	-4.32682
Q9BVN2	RUSC1	INM:SMES:AR02	0.839339	11.0596	1.74192	0.0994115	0.519337	-4.33163
Q9Y2X7	GIT1	INM:SMES:AR02	0.448612	12.6368	1.74062	0.0996448	0.519337	-4.33335
O75534	CSDE1	INM:SMES:AR02	-0.488122	11.9755	-1.73693	0.10031	0.519337	-4.33823
Q13952	NFYC	INM:SMES:AR02	-0.622151	12.276	-1.73657	0.100375	0.519337	-4.33871
P49593	PPM1F	INM:SMES:AR02	0.618472	12.0697	1.73617	0.100447	0.519337	-4.33923
P54619	PRKAG1	INM:SMES:AR02	0.290645	13.5468	1.73406	0.10083	0.519337	-4.34202
Q96ST2	IWS1	INM:SMES:AR02	0.380567	12.6464	1.7339	0.100859	0.519337	-4.34223
P14317	HCLS1	INM:SMES:AR02	0.443952	16.0241	1.73286	0.101049	0.519337	-4.34361
Q9C0E8	LNPK	INM:SMES:AR02	0.353829	15.2439	1.72429	0.102617	0.524994	-4.35488
P36507	MAP2K2	INM:SMES:AR02	-0.382539	15.2406	-1.72421	0.102632	0.524994	-4.35499
O15427	SLC16A3	INM:SMES:AR02	-0.299912	14.2518	-1.71884	0.103626	0.528595	-4.36204
Q12972	PPP1R8	INM:SMES:AR02	0.565243	12.125	1.71778	0.103823	0.528595	-4.36343
P14868	DARS1	INM:SMES:AR02	0.361458	15.3786	1.71643	0.104075	0.528641	-4.3652
P10124	SRGN	INM:SMES:AR02	0.692017	15.2102	1.71471	0.104395	0.528952	-4.36745
Q9NUP1	BLOC1S4	INM:SMES:AR02	-0.449023	13.2106	-1.71303	0.10471	0.528952	-4.36965
P61916	NPC2	INM:SMES:AR02	-0.445259	13.5089	-1.7122	0.104866	0.528952	-4.37073
P61803	DAD1	INM:SMES:AR02	-0.452163	15.9149	-1.70811	0.105636	0.529099	-4.37608
P29375	KDM5A	INM:SMES:AR02	0.364057	13.8653	1.70731	0.105788	0.529099	-4.37712
Q13535	ATR	INM:SMES:AR02	0.43436	17.2557	1.7058	0.106075	0.529099	-4.3791
Q13627	DYRK1A	INM:SMES:AR02	0.370612	13.7781	1.70567	0.106099	0.529099	-4.37927
Q9Y6E0	STK24	INM:SMES:AR02	0.419285	14.306	1.70544	0.106142	0.529099	-4.37957
P41236	PPP1R2	INM:SMES:AR02	-0.425458	13.124	-1.70361	0.10649	0.529099	-4.38195
Q6NUM6	TYW1B	INM:SMES:AR02	0.357028	13.647	1.70276	0.106652	0.529099	-4.38306
P08567	PLEK	INM:SMES:AR02	0.349869	14.0503	1.70176	0.106842	0.529099	-4.38436
P27797	CALR	INM:SMES:AR02	0.377744	13.1844	1.69926	0.10732	0.530259	-4.38762
P14314	PRKCSH	INM:SMES:AR02	0.270706	14.7603	1.69668	0.107816	0.531499	-4.39098
Q86X76	NIT1	INM:SMES:AR02	-0.398933	12.541	-1.6954	0.108061	0.531505	-4.39263
Q8NHU6	TDRD7	INM:SMES:AR02	0.557851	11.182	1.69205	0.10871	0.532695	-4.397
P49589	CARS1	INM:SMES:AR02	0.533157	12.8923	1.69162	0.108793	0.532695	-4.39755
Q96GE4	CEP95	INM:SMES:AR02	-0.735656	19.4758	-1.68939	0.109225	0.533609	-4.40044
A8MTJ3	GNAT3	INM:SMES:AR02	-0.327817	15.8477	-1.68679	0.109733	0.534599	-4.40381
P13727	PRG2	INM:SMES:AR02	-1.14617	15.2674	-1.68583	0.10992	0.534599	-4.40505
P15309	ACP3	INM:SMES:AR02	0.514854	12.4784	1.68143	0.110783	0.536969	-4.41074
Q96P70	IPO9	INM:SMES:AR02	-0.446327	12.0578	-1.68037	0.110992	0.536969	-4.41211
P16150	SPN	INM:SMES:AR02	0.325893	16.0599	1.67958	0.111148	0.536969	-4.41313
O15145	ARPC3	INM:SMES:AR02	0.292987	13.9395	1.67651	0.111755	0.538705	-4.41709
Q96CP2	FLYWCH2	INM:SMES:AR02	-0.531794	11.6173	-1.67338	0.112377	0.539232	-4.42113
Q9Y5L4	TIMM13	INM:SMES:AR02	0.752341	10.5431	1.67161	0.112732	0.539232	-4.42341
Q9UJY5	GGA1	INM:SMES:AR02	0.405396	14.7767	1.66956	0.113142	0.539232	-4.42605
O75131	CPNE3	INM:SMES:AR02	-0.533214	14.3759	-1.6695	0.113153	0.539232	-4.42612
P29597	TYK2	INM:SMES:AR02	-0.414321	13.6904	-1.66905	0.113244	0.539232	-4.4267
Q93009	USP7	INM:SMES:AR02	0.353714	13.8237	1.66817	0.113421	0.539232	-4.42784
Q9UBS4	DNAJB11	INM:SMES:AR02	0.302437	16.6774	1.66727	0.113601	0.539232	-4.42899
Q86UX7	FERMT3	INM:SMES:AR02	-0.497412	15.2193	-1.66093	0.114884	0.541262	-4.43713
Q99442	SEC62	INM:SMES:AR02	0.907006	9.73054	1.66083	0.114903	0.541262	-4.43725
Q96GX9	APIP	INM:SMES:AR02	0.309854	14.3392	1.65967	0.115139	0.541262	-4.43874
P23526	AHCY	INM:SMES:AR02	0.329502	15.5305	1.65941	0.115192	0.541262	-4.43907
P10253	GAA	INM:SMES:AR02	-0.627987	11.9799	-1.65901	0.115273	0.541262	-4.43959
O00483	NDUFA4	INM:SMES:AR02	-0.507709	12.579	-1.65406	0.116286	0.543824	-4.44592
P30046	DDT	INM:SMES:AR02	-0.5481	13.6935	-1.65313	0.116476	0.543824	-4.4471
Q07890	SOS2	INM:SMES:AR02	0.847878	9.34307	1.65125	0.116863	0.543824	-4.44951
P13498	CYBA	INM:SMES:AR02	-0.491609	17.1165	-1.65077	0.116963	0.543824	-4.45013
Q14624	ITIH4	INM:SMES:AR02	-0.360935	13.9439	-1.65025	0.11707	0.543824	-4.45078
P18669	PGAM1	INM:SMES:AR02	0.539594	14.0056	1.64831	0.117472	0.544206	-4.45326
Q9BYK8	HELZ2	INM:SMES:AR02	0.365607	17.748	1.64743	0.117653	0.544206	-4.45438
Q7KZI7	MARK2	INM:SMES:AR02	0.481542	12.8025	1.64367	0.118435	0.54666	-4.45917
P78406	RAE1	INM:SMES:AR02	0.929721	12.6829	1.64166	0.118854	0.547433	-4.46172
O60825	PFKFB2	INM:SMES:AR02	-0.48613	14.0281	-1.64036	0.119126	0.547527	-4.46338
Q9UKY7	CDV3	INM:SMES:AR02	0.591893	11.672	1.6369	0.119854	0.548601	-4.46778
Q86WV6	STING1	INM:SMES:AR02	-0.666117	15.0724	-1.6364	0.119959	0.548601	-4.46841
Q96HS1	PGAM5	INM:SMES:AR02	-0.677017	12.8389	-1.63565	0.120117	0.548601	-4.46936
P14625	HSP90B1	INM:SMES:AR02	-0.331891	16.0259	-1.63005	0.121303	0.552074	-4.47645
P19525	EIF2AK2	INM:SMES:AR02	0.356687	12.0285	1.62967	0.121385	0.552074	-4.47694
P25774	CTSS	INM:SMES:AR02	0.42445	11.812	1.62675	0.122007	0.553743	-4.48062
Q14790	CASP8	INM:SMES:AR02	0.340698	12.2641	1.62412	0.122571	0.554828	-4.48395
O76096	CST7	INM:SMES:AR02	-0.560166	11.803	-1.62326	0.122756	0.554828	-4.48503
Q9ULC5	ACSL5	INM:SMES:AR02	-0.475488	12.7253	-1.61904	0.123665	0.55632	-4.49035
Q8IU60	DCP2	INM:SMES:AR02	0.582307	11.3225	1.61827	0.123833	0.55632	-4.49132
Q92522	H1-10	INM:SMES:AR02	-0.566415	13.7896	-1.61637	0.124244	0.55632	-4.49371
Q5EBM0	CMPK2	INM:SMES:AR02	-0.688784	13.5511	-1.61575	0.12438	0.55632	-4.4945
Q9UBW5	BIN2	INM:SMES:AR02	-0.52346	13.7309	-1.61515	0.12451	0.55632	-4.49525
Q8N5M9	JAGN1	INM:SMES:AR02	0.388423	12.01	1.61463	0.124622	0.55632	-4.49589
Q14571	ITPR2	INM:SMES:AR02	0.669917	11.2053	1.61336	0.124899	0.556416	-4.49749
O94906	PRPF6	INM:SMES:AR02	0.518659	12.2007	1.60869	0.125921	0.558414	-4.50335
Q13242	SRSF9	INM:SMES:AR02	-0.591722	12.2386	-1.60764	0.126152	0.558414	-4.50467
P56192	MARS1	INM:SMES:AR02	-0.442439	12.1278	-1.60696	0.126302	0.558414	-4.50553
P17812	CTPS1	INM:SMES:AR02	0.471571	12.6068	1.60663	0.126375	0.558414	-4.50594
Q9NUU6	OTULINL	INM:SMES:AR02	0.378271	13.1492	1.60324	0.127123	0.558554	-4.51018
Q9HAB8	PPCS	INM:SMES:AR02	-0.647216	12.2471	-1.60136	0.12754	0.558554	-4.51253
Q9HBI0	PARVG	INM:SMES:AR02	0.329757	13.959	1.60134	0.127544	0.558554	-4.51255
Q9C0C9	UBE2O	INM:SMES:AR02	0.566864	13.0569	1.60067	0.127692	0.558554	-4.51339
Q6NUK1	SLC25A24	INM:SMES:AR02	0.266921	15.4295	1.60067	0.127693	0.558554	-4.51339
P50750	CDK9	INM:SMES:AR02	-0.624494	12.328	-1.59947	0.127959	0.558554	-4.51489
P49588	AARS1	INM:SMES:AR02	0.439125	12.1666	1.59815	0.128254	0.558554	-4.51654
Q8WWM7	ATXN2L	INM:SMES:AR02	0.466981	10.7767	1.59696	0.128519	0.558554	-4.51802
P49368	CCT3	INM:SMES:AR02	0.324743	13.4918	1.59583	0.128773	0.558554	-4.51943
P08697	SERPINF2	INM:SMES:AR02	-0.458494	14.0867	-1.59492	0.128976	0.558554	-4.52056
Q92900	UPF1	INM:SMES:AR02	0.271103	13.085	1.58798	0.13054	0.564201	-4.5292
Q99961	SH3GL1	INM:SMES:AR02	0.299389	14.4372	1.58417	0.131406	0.565884	-4.53394
O60869	EDF1	INM:SMES:AR02	-0.331207	12.2054	-1.58101	0.132126	0.565884	-4.53785
P46926	GNPDA1	INM:SMES:AR02	0.521299	12.3719	1.58007	0.132341	0.565884	-4.53901
P16104	H2AX	INM:SMES:AR02	-0.631783	21.3454	-1.57947	0.132479	0.565884	-4.53975
Q02818	NUCB1	INM:SMES:AR02	0.276732	15.0792	1.57944	0.132485	0.565884	-4.53979
P22314	UBA1	INM:SMES:AR02	0.43405	13.6788	1.57855	0.13269	0.565884	-4.54089
O14727	APAF1	INM:SMES:AR02	0.366229	13.6351	1.578	0.132817	0.565884	-4.54157
Q13263	TRIM28	INM:SMES:AR02	0.308919	12.2297	1.57629	0.13321	0.565884	-4.54369
P67870	CSNK2B	INM:SMES:AR02	0.351505	14.1301	1.57531	0.133436	0.565884	-4.5449
P62834	RAP1A	INM:SMES:AR02	-0.435087	14.4855	-1.57218	0.13416	0.565884	-4.54876
P30086	PEBP1	INM:SMES:AR02	0.669215	10.9708	1.57116	0.134396	0.565884	-4.55002
P38646	HSPA9	INM:SMES:AR02	-0.331738	14.0572	-1.56939	0.134806	0.565884	-4.5522
Q96F15	GIMAP5	INM:SMES:AR02	-0.501418	13.0065	-1.56936	0.134815	0.565884	-4.55224
O95479	H6PD	INM:SMES:AR02	-0.279317	14.8962	-1.56834	0.135053	0.565884	-4.5535
P56537	EIF6	INM:SMES:AR02	-0.439739	12.5731	-1.56824	0.135076	0.565884	-4.55362
Q7Z6P3		INM:SMES:AR02	0.38777	13.6039	1.56727	0.1353	0.565884	-4.55481
Q8N3F8	MICALL1	INM:SMES:AR02	0.352613	12.3512	1.56658	0.135462	0.565884	-4.55566
P80217	IFI35	INM:SMES:AR02	0.262558	13.9531	1.56593	0.135614	0.565884	-4.55646
P04844	RPN2	INM:SMES:AR02	0.399233	13.3567	1.56224	0.136479	0.566261	-4.561
Q9Y624	F11R	INM:SMES:AR02	-0.609869	10.4751	-1.56186	0.136568	0.566261	-4.56146
Q5VWQ0	RSBN1	INM:SMES:AR02	-0.701082	10.423	-1.55914	0.137209	0.566261	-4.5648
P21333	FLNA	INM:SMES:AR02	0.300219	17.6782	1.55868	0.13732	0.566261	-4.56537
Q5HYW2		INM:SMES:AR02	0.278657	14.0925	1.5586	0.137338	0.566261	-4.56546
O75334	PPFIA2	INM:SMES:AR02	-0.596874	14.4882	-1.55795	0.137492	0.566261	-4.56626
P46781	RPS9	INM:SMES:AR02	-0.632213	15.457	-1.55779	0.137528	0.566261	-4.56645
Q13164	MAPK7	INM:SMES:AR02	0.274685	13.8048	1.55315	0.138632	0.56807	-4.57214
Q6WKZ4	RAB11FIP1	INM:SMES:AR02	0.277302	14.5318	1.55256	0.138771	0.56807	-4.57286
Q9Y2Z0	SUGT1	INM:SMES:AR02	0.297061	13.5528	1.55226	0.138843	0.56807	-4.57323
Q9NRV9	HEBP1	INM:SMES:AR02	0.512026	12.9578	1.55155	0.139012	0.56807	-4.5741
Q567U6	CCDC93	INM:SMES:AR02	0.325693	13.1808	1.54995	0.139394	0.568561	-4.57605
Q9BRT3	MIEN1	INM:SMES:AR02	0.328237	13.2392	1.5479	0.139885	0.569495	-4.57855
O75475	PSIP1	INM:SMES:AR02	0.367058	13.4981	1.54567	0.140421	0.56993	-4.58127
Q5SR53		INM:SMES:AR02	-0.69151	13.297	-1.5452	0.140535	0.56993	-4.58184
Q99623	PHB2	INM:SMES:AR02	0.578238	12.0833	1.54345	0.140957	0.56993	-4.58397
P61586	RHOA	INM:SMES:AR02	-0.470152	14.6294	-1.54243	0.141204	0.56993	-4.58522
O43166	SIPA1L1	INM:SMES:AR02	0.627015	12.7625	1.54127	0.141486	0.56993	-4.58663
P22681	CBL	INM:SMES:AR02	0.255548	15.527	1.53993	0.141811	0.56993	-4.58826
Q96JJ3	ELMO2	INM:SMES:AR02	0.393215	14.8472	1.53978	0.141847	0.56993	-4.58844
Q9BXP5	SRRT	INM:SMES:AR02	0.283559	13.8526	1.53878	0.142089	0.56993	-4.58965
Q9UH99	SUN2	INM:SMES:AR02	0.306601	12.9482	1.53648	0.14265	0.570082	-4.59245
Q8IZP2		INM:SMES:AR02	0.466184	13.3256	1.53639	0.142672	0.570082	-4.59256
P22102	GART	INM:SMES:AR02	0.366425	12.8423	1.53392	0.143275	0.570082	-4.59555
Q9H2M9	RAB3GAP2	INM:SMES:AR02	0.272547	14.4182	1.53327	0.143434	0.570082	-4.59634
Q9H7L9	SUDS3	INM:SMES:AR02	0.348839	12.3647	1.53316	0.143461	0.570082	-4.59647
Q9NUJ1	ABHD10	INM:SMES:AR02	-0.395728	12.7686	-1.53208	0.143727	0.570082	-4.59778
O43353	RIPK2	INM:SMES:AR02	0.443652	12.865	1.52983	0.14428	0.570082	-4.60051
Q13637	RAB32	INM:SMES:AR02	-0.455557	13.9453	-1.52959	0.144338	0.570082	-4.60079
P51153	RAB13	INM:SMES:AR02	-0.317494	15.7585	-1.52844	0.144621	0.570082	-4.60218
Q9Y6K0	CEPT1	INM:SMES:AR02	-0.445384	12.8699	-1.52697	0.144984	0.570082	-4.60395
Q92616	GCN1	INM:SMES:AR02	0.303757	12.7972	1.52663	0.14507	0.570082	-4.60438
Q96HW7	INTS4	INM:SMES:AR02	0.407766	12.0861	1.5258	0.145274	0.570082	-4.60537
P48444	ARCN1	INM:SMES:AR02	0.487853	11.669	1.52283	0.146013	0.570387	-4.60896
Q9BX95	SGPP1	INM:SMES:AR02	0.668993	11.7215	1.5226	0.146069	0.570387	-4.60923
P78368	CSNK1G2	INM:SMES:AR02	-0.266249	12.9054	-1.52199	0.146222	0.570387	-4.60998
Q96DI7	SNRNP40	INM:SMES:AR02	0.401335	11.9541	1.52013	0.146686	0.570387	-4.61222
Q9UBQ7	GRHPR	INM:SMES:AR02	0.379775	12.4585	1.51969	0.146796	0.570387	-4.61274
P48047	ATP5PO	INM:SMES:AR02	-0.346966	14.1081	-1.51917	0.146926	0.570387	-4.61337
Q15369	ELOC	INM:SMES:AR02	-0.775367	12.3455	-1.51457	0.148078	0.573836	-4.61889
Q15365	PCBP1	INM:SMES:AR02	-0.817602	14.5707	-1.5104	0.149132	0.576671	-4.6239
P48595	SERPINB10	INM:SMES:AR02	0.29981	15.2338	1.50957	0.14934	0.576671	-4.62489
P20337	RAB3B	INM:SMES:AR02	-1.0629	15.2821	-1.50744	0.149882	0.576834	-4.62744
Q99459	CDC5L	INM:SMES:AR02	-0.426916	14.6874	-1.50732	0.149913	0.576834	-4.62759
Q9H0Q0	CYRIA	INM:SMES:AR02	-0.38681	13.6942	-1.5049	0.150528	0.577173	-4.63048
Q9BTD8	RBM42	INM:SMES:AR02	-0.609149	12.3258	-1.50489	0.150532	0.577173	-4.6305
Q9UJZ1	STOML2	INM:SMES:AR02	0.387881	14.5318	1.5017	0.151348	0.577405	-4.63431
Q9H074	PAIP1	INM:SMES:AR02	0.387468	13.1804	1.50145	0.151412	0.577405	-4.63461
Q8N1G4	LRRC47	INM:SMES:AR02	-0.422902	12.337	-1.50131	0.151446	0.577405	-4.63476
P67775	PPP2CA	INM:SMES:AR02	0.374044	13.8075	1.5005	0.151655	0.577405	-4.63574
P19878	NCF2	INM:SMES:AR02	0.357487	15.9083	1.49704	0.152545	0.578339	-4.63986
P11413	G6PD	INM:SMES:AR02	0.231251	17.147	1.497	0.152557	0.578339	-4.63991
P55735	SEC13	INM:SMES:AR02	-0.284815	12.5868	-1.49645	0.152698	0.578339	-4.64056
P36871	PGM1	INM:SMES:AR02	0.674492	12.1114	1.49437	0.153237	0.578494	-4.64304
Q9H0U4	RAB1B	INM:SMES:AR02	0.413025	14.7914	1.49423	0.153272	0.578494	-4.6432
P35232	PHB1	INM:SMES:AR02	-0.441131	15.9998	-1.49019	0.154322	0.581449	-4.64801
P53990	IST1	INM:SMES:AR02	-0.288642	14.0018	-1.48711	0.155126	0.583467	-4.65166
Q14554	PDIA5	INM:SMES:AR02	0.321854	12.7794	1.4832	0.156151	0.586074	-4.65628
P12814	ACTN1	INM:SMES:AR02	0.30383	18.1877	1.48174	0.156535	0.586074	-4.65801
P41240	CSK	INM:SMES:AR02	-0.793224	12.0291	-1.48107	0.156712	0.586074	-4.6588
P01889	HLA-B	INM:SMES:AR02	-0.601387	13.676	-1.48037	0.156897	0.586074	-4.65963
P61160	ACTR2	INM:SMES:AR02	0.328565	17.6088	1.47899	0.157262	0.586429	-4.66126
P48556	PSMD8	INM:SMES:AR02	0.278426	14.1185	1.47143	0.159271	0.592069	-4.67016
Q9H078	CLPB	INM:SMES:AR02	0.362586	12.0583	1.47125	0.159319	0.592069	-4.67037
P49959	MRE11	INM:SMES:AR02	0.328375	11.5474	1.46713	0.160425	0.594453	-4.67521
Q9HDC9	APMAP	INM:SMES:AR02	-0.627916	18.6958	-1.46682	0.160508	0.594453	-4.67558
O95352	ATG7	INM:SMES:AR02	0.328755	13.0903	1.46113	0.162044	0.59594	-4.68224
Q9UBR5	CKLF	INM:SMES:AR02	-0.38387	15.1186	-1.46083	0.162127	0.59594	-4.68259
Q8IUC8	GALNT13	INM:SMES:AR02	-0.426717	14.9818	-1.46058	0.162194	0.59594	-4.68288
Q6PGP7	SKIC3	INM:SMES:AR02	-0.988405	12.703	-1.46046	0.162227	0.59594	-4.68302
Q8WXI9	GATAD2B	INM:SMES:AR02	-0.429842	15.2666	-1.46026	0.16228	0.59594	-4.68325
O95336	PGLS	INM:SMES:AR02	-0.639125	13.0802	-1.45776	0.162959	0.597426	-4.68617
Q15417	CNN3	INM:SMES:AR02	-0.366631	14.8582	-1.45484	0.163758	0.599345	-4.68959
Q8N6D5	ANKRD29	INM:SMES:AR02	-0.510774	13.3028	-1.45325	0.164192	0.599923	-4.69143
Q9UJX5	ANAPC4	INM:SMES:AR02	0.459461	13.6541	1.44983	0.165134	0.601422	-4.69542
Q9P2J5	LARS1	INM:SMES:AR02	0.626097	11.3232	1.44947	0.165233	0.601422	-4.69584
Q9Y4Z0	LSM4	INM:SMES:AR02	0.309174	13.1818	1.44648	0.166056	0.601422	-4.6993
O60493	SNX3	INM:SMES:AR02	-1.04755	12.0618	-1.44586	0.16623	0.601422	-4.70003
Q9Y487	ATP6V0A2	INM:SMES:AR02	0.357311	12.3282	1.44413	0.166708	0.601422	-4.70203
Q9Y371	SH3GLB1	INM:SMES:AR02	-0.224936	13.9055	-1.44343	0.166903	0.601422	-4.70285
Q15691	MAPRE1	INM:SMES:AR02	0.608627	13.4838	1.43983	0.167906	0.601422	-4.70702
O95466	FMNL1	INM:SMES:AR02	-0.272478	14.4323	-1.43876	0.168204	0.601422	-4.70825
Q8IY21	DDX60	INM:SMES:AR02	0.309034	12.6435	1.4376	0.168529	0.601422	-4.70959
Q96F46	IL17RA	INM:SMES:AR02	0.320459	12.7962	1.43731	0.16861	0.601422	-4.70993
Q5TBA9	FRY	INM:SMES:AR02	-0.493517	12.7351	-1.43719	0.168643	0.601422	-4.71007
P07951	TPM2	INM:SMES:AR02	0.347829	14.6879	1.43637	0.168875	0.601422	-4.71102
O95260	ATE1	INM:SMES:AR02	0.345409	13.067	1.43627	0.168902	0.601422	-4.71113
Q9UKK9	NUDT5	INM:SMES:AR02	0.303383	13.3168	1.4362	0.168921	0.601422	-4.71121
P33176	KIF5B	INM:SMES:AR02	0.288568	13.1762	1.43502	0.169253	0.601422	-4.71257
Q8TEH3	DENND1A	INM:SMES:AR02	0.368146	11.8995	1.43488	0.169292	0.601422	-4.71273
P98175	RBM10	INM:SMES:AR02	-0.385358	11.6605	-1.43373	0.169616	0.601422	-4.71406
Q8NF91	SYNE1	INM:SMES:AR02	-0.286614	14.7775	-1.43327	0.169744	0.601422	-4.71459
Q15526	SURF1	INM:SMES:AR02	-0.457762	13.0977	-1.43221	0.170045	0.601422	-4.71582
P21283	ATP6V1C1	INM:SMES:AR02	-0.346176	13.4596	-1.4317	0.170187	0.601422	-4.7164
P68402	PAFAH1B2	INM:SMES:AR02	0.285596	12.6406	1.43091	0.170412	0.601422	-4.71731
Q9Y3R5	DOP1B	INM:SMES:AR02	-0.671625	10.4676	-1.42575	0.171873	0.604137	-4.72324
P21108	PRPS1L1	INM:SMES:AR02	-0.707248	11.9099	-1.4257	0.171889	0.604137	-4.7233
Q92804	TAF15	INM:SMES:AR02	-0.576846	13.005	-1.42522	0.172024	0.604137	-4.72385
Q15746	MYLK	INM:SMES:AR02	-0.650785	14.2495	-1.42412	0.172338	0.604137	-4.72511
P09668	CTSH	INM:SMES:AR02	0.315487	13.652	1.42329	0.172575	0.604137	-4.72606
P11234	RALB	INM:SMES:AR02	-0.611513	12.2828	-1.42233	0.172849	0.604137	-4.72716
Q8NCN5	PDPR	INM:SMES:AR02	-0.389627	13.4014	-1.41408	0.175221	0.608848	-4.7366
P63244	RACK1	INM:SMES:AR02	-0.737223	13.6544	-1.41018	0.176351	0.608848	-4.74105
Q7Z5G4	GOLGA7	INM:SMES:AR02	0.326065	15.6456	1.4081	0.176956	0.608848	-4.74341
P12429	ANXA3	INM:SMES:AR02	0.531609	13.8261	1.40763	0.177094	0.608848	-4.74395
Q9P2K8	EIF2AK4	INM:SMES:AR02	-0.614931	11.6253	-1.40756	0.177113	0.608848	-4.74402
Q7Z6I6	ARHGAP30	INM:SMES:AR02	0.412799	13.0683	1.40686	0.177319	0.608848	-4.74483
O95873	C6orf47	INM:SMES:AR02	0.500189	10.9959	1.40561	0.177682	0.608848	-4.74624
P23284	PPIB	INM:SMES:AR02	0.402352	15.3037	1.40537	0.177752	0.608848	-4.74651
Q8N2G8	GHDC	INM:SMES:AR02	-0.67094	11.2437	-1.40534	0.177763	0.608848	-4.74656
Q92621	NUP205	INM:SMES:AR02	-0.218361	14.9205	-1.40501	0.177859	0.608848	-4.74693
Q6JBY9	RCSD1	INM:SMES:AR02	0.389335	15.7542	1.40445	0.178023	0.608848	-4.74756
P29401	TKT	INM:SMES:AR02	0.272685	16.0034	1.4041	0.178125	0.608848	-4.74796
Q2KHT3	CLEC16A	INM:SMES:AR02	-0.347327	15.5907	-1.404	0.178154	0.608848	-4.74807
P0CG48	UBC	INM:SMES:AR02	-0.34263	19.5623	-1.40355	0.178287	0.608848	-4.74859
P04839	CYBB	INM:SMES:AR02	-0.480224	14.9218	-1.40317	0.178398	0.608848	-4.74901
O00233	PSMD9	INM:SMES:AR02	0.330453	13.3927	1.40042	0.179206	0.609368	-4.75213
Q70J99	UNC13D	INM:SMES:AR02	0.414832	14.7169	1.39953	0.179469	0.609368	-4.75314
O95721	SNAP29	INM:SMES:AR02	-0.276329	13.6247	-1.39934	0.179522	0.609368	-4.75335
Q9BVK6	TMED9	INM:SMES:AR02	-0.426757	14.498	-1.39763	0.180027	0.609368	-4.75528
Q9Y296	TRAPPC4	INM:SMES:AR02	-0.414461	13.0087	-1.39694	0.180232	0.609368	-4.75607
P11169	SLC2A3	INM:SMES:AR02	-0.290652	15.4082	-1.39694	0.180233	0.609368	-4.75607
P47756	CAPZB	INM:SMES:AR02	0.270105	16.8247	1.39365	0.181207	0.609368	-4.75978
Q96RT1	ERBIN	INM:SMES:AR02	-0.404232	12.8372	-1.39362	0.181216	0.609368	-4.75982
P11678	EPX	INM:SMES:AR02	-0.357915	17.114	-1.39345	0.181266	0.609368	-4.76001
P52209	PGD	INM:SMES:AR02	0.365685	17.9022	1.39316	0.181353	0.609368	-4.76034
Q6YN16	HSDL2	INM:SMES:AR02	-0.406645	14.0148	-1.38717	0.183139	0.610012	-4.76708
Q14254	FLOT2	INM:SMES:AR02	-0.552913	13.8907	-1.38711	0.183159	0.610012	-4.76715
Q02224	CENPE	INM:SMES:AR02	0.696551	11.2428	1.38551	0.183638	0.610012	-4.76895
Q9ULD4	BRPF3	INM:SMES:AR02	-0.470962	11.0626	-1.38475	0.183867	0.610012	-4.7698
P98160	HSPG2	INM:SMES:AR02	0.546631	13.009	1.38402	0.184086	0.610012	-4.77062
Q9NQC3	RTN4	INM:SMES:AR02	0.505824	18.4922	1.38365	0.184196	0.610012	-4.77103
Q9NPI7	KRCC1	INM:SMES:AR02	0.266391	17.3111	1.38119	0.184939	0.610012	-4.7738
Q6VN20	RANBP10	INM:SMES:AR02	0.415992	12.4164	1.38102	0.184991	0.610012	-4.77399
Q9H0E2	TOLLIP	INM:SMES:AR02	0.44486	13.5043	1.38066	0.1851	0.610012	-4.7744
Q92575	UBXN4	INM:SMES:AR02	-0.493968	12.1475	-1.38045	0.185161	0.610012	-4.77462
Q9BSA9	TMEM175	INM:SMES:AR02	0.426408	11.8311	1.38008	0.185274	0.610012	-4.77504
P04920	SLC4A2	INM:SMES:AR02	-0.424061	11.8738	-1.37955	0.185433	0.610012	-4.77563
Q6IS14	EIF5AL1	INM:SMES:AR02	0.818716	13.3969	1.37944	0.185469	0.610012	-4.77576
Q12907	LMAN2	INM:SMES:AR02	-0.575226	13.7685	-1.37942	0.185473	0.610012	-4.77578
P78324	SIRPA	INM:SMES:AR02	-0.41643	14.1874	-1.37655	0.186344	0.61195	-4.77899
Q8TD19	NEK9	INM:SMES:AR02	0.385598	11.6482	1.37362	0.187235	0.612818	-4.78226
Q99873	PRMT1	INM:SMES:AR02	-0.412322	11.9079	-1.37317	0.187372	0.612818	-4.78276
Q9NS23	RASSF1	INM:SMES:AR02	-0.307851	12.7834	-1.37291	0.187453	0.612818	-4.78306
P06899	H2BC11	INM:SMES:AR02	-0.307072	20.0331	-1.36966	0.188448	0.615144	-4.78668
P13473	LAMP2	INM:SMES:AR02	-0.29821	17.3451	-1.36764	0.189065	0.616234	-4.78892
Q9Y2I8	WDR37	INM:SMES:AR02	0.900481	10.8296	1.36573	0.189656	0.617234	-4.79105
Q7Z5K2	WAPL	INM:SMES:AR02	0.305656	12.4687	1.36441	0.190061	0.617628	-4.79251
Q8N9N7	LRRC57	INM:SMES:AR02	0.220297	14.7639	1.36001	0.191425	0.620641	-4.7974
O43488	AKR7A2	INM:SMES:AR02	-0.236876	12.8001	-1.35941	0.191608	0.620641	-4.79805
Q9HBF4	ZFYVE1	INM:SMES:AR02	0.416826	11.8007	1.35865	0.191845	0.620641	-4.79889
O75608	LYPLA1	INM:SMES:AR02	0.271429	15.0626	1.35673	0.192445	0.621655	-4.80102
Q5JRA6	MIA3	INM:SMES:AR02	-0.426449	18.7535	-1.35489	0.193018	0.621655	-4.80305
Q96F24	NRBF2	INM:SMES:AR02	-0.649304	13.0375	-1.35411	0.193261	0.621655	-4.80391
Q7Z739	YTHDF3	INM:SMES:AR02	0.323617	12.3569	1.35323	0.193537	0.621655	-4.80488
Q9Y2B0	CNPY2	INM:SMES:AR02	-0.425128	13.2965	-1.35307	0.193588	0.621655	-4.80506
Q02878	RPL6	INM:SMES:AR02	-0.290819	16.7158	-1.34886	0.194911	0.62498	-4.8097
P51608	MECP2	INM:SMES:AR02	-0.640597	11.4873	-1.34581	0.195873	0.626355	-4.81306
Q03001	DST	INM:SMES:AR02	-0.48523	15.1043	-1.34567	0.195916	0.626355	-4.8132
P51531	SMARCA2	INM:SMES:AR02	0.419392	11.5032	1.34183	0.197133	0.627144	-4.81742
Q9BUH6	PAXX	INM:SMES:AR02	0.249785	15.278	1.34091	0.197427	0.627144	-4.81843
Q29RF7	PDS5A	INM:SMES:AR02	0.208983	14.7558	1.34082	0.197455	0.627144	-4.81852
Q96C19	EFHD2	INM:SMES:AR02	0.303844	16.8921	1.34075	0.197477	0.627144	-4.8186
Q96AA3	RFT1	INM:SMES:AR02	-0.385009	14.5625	-1.34035	0.197605	0.627144	-4.81904
A8MXV4	NUDT19	INM:SMES:AR02	0.379568	11.7636	1.33853	0.198184	0.627225	-4.82103
Q13094	LCP2	INM:SMES:AR02	0.284922	12.3833	1.33846	0.198208	0.627225	-4.82111
Q9BYM8	RBCK1	INM:SMES:AR02	0.512009	12.2896	1.33615	0.198946	0.628645	-4.82363
O75694	NUP155	INM:SMES:AR02	0.369247	15.1284	1.3319	0.200311	0.630722	-4.82827
Q14697	GANAB	INM:SMES:AR02	0.311666	17.7037	1.33063	0.200719	0.630722	-4.82965
Q8NF37	LPCAT1	INM:SMES:AR02	-0.244665	14.9563	-1.32831	0.201469	0.630722	-4.83218
Q13492	PICALM	INM:SMES:AR02	-0.335722	12.7927	-1.32642	0.202079	0.630722	-4.83422
Q05086	UBE3A	INM:SMES:AR02	0.439089	11.7358	1.32633	0.202109	0.630722	-4.83433
Q08378	GOLGA3	INM:SMES:AR02	-0.340249	12.2466	-1.32597	0.202225	0.630722	-4.83472
P81605	DCD	INM:SMES:AR02	-0.74916	14.5693	-1.32571	0.202311	0.630722	-4.835
Q92608	DOCK2	INM:SMES:AR02	0.253294	15.148	1.3233	0.203094	0.630722	-4.83762
Q9Y262	EIF3L	INM:SMES:AR02	-0.279315	13.1754	-1.32241	0.203384	0.630722	-4.83858
Q96N11	INTS15	INM:SMES:AR02	-0.702164	11.5673	-1.32228	0.203425	0.630722	-4.83872
Q9P0P0	RNF181	INM:SMES:AR02	-0.395335	11.905	-1.3215	0.20368	0.630722	-4.83956
P06239	LCK	INM:SMES:AR02	-0.353241	12.2356	-1.32091	0.203871	0.630722	-4.8402
Q00653	NFKB2	INM:SMES:AR02	0.358837	12.1385	1.31847	0.20467	0.630722	-4.84284
Q99536	VAT1	INM:SMES:AR02	0.324645	19.0935	1.31841	0.204691	0.630722	-4.84291
A0A075B759	PPIAL4F	INM:SMES:AR02	0.708731	15.2292	1.31834	0.204712	0.630722	-4.84298
Q92614	MYO18A	INM:SMES:AR02	0.230112	14.6255	1.31768	0.204929	0.630722	-4.8437
Q8N0U8	VKORC1L1	INM:SMES:AR02	-0.675777	10.8035	-1.31691	0.205182	0.630722	-4.84453
Q96J02	ITCH	INM:SMES:AR02	0.285331	12.3801	1.31623	0.205405	0.630722	-4.84526
P09497	CLTB	INM:SMES:AR02	-0.399766	13.8232	-1.31503	0.205799	0.630722	-4.84656
Q9UM00	TMCO1	INM:SMES:AR02	-0.435549	13.6168	-1.31478	0.205881	0.630722	-4.84683
P50548	ERF	INM:SMES:AR02	0.786642	9.15529	1.31447	0.205981	0.630722	-4.84716
Q8NH03	OR2T3	INM:SMES:AR02	0.594048	12.6924	1.31392	0.206165	0.630722	-4.84776
Q8TCT9	HM13	INM:SMES:AR02	0.278594	14.9226	1.31358	0.206276	0.630722	-4.84812
P22626	HNRNPA2B1	INM:SMES:AR02	0.266921	18.981	1.31178	0.206871	0.631653	-4.85006
O60437	PPL	INM:SMES:AR02	0.282635	14.8177	1.3102	0.207393	0.632165	-4.85176
Q7Z460	CLASP1	INM:SMES:AR02	-0.363019	11.7559	-1.30905	0.207772	0.632165	-4.85299
Q6DD87	ZNF787	INM:SMES:AR02	0.225249	13.1623	1.30808	0.208095	0.632165	-4.85404
P23634	ATP2B4	INM:SMES:AR02	-0.432577	13.0118	-1.30737	0.208331	0.632165	-4.8548
Q9UBV2	SEL1L	INM:SMES:AR02	0.459812	15.2901	1.30688	0.208492	0.632165	-4.85532
Q9Y4I1	MYO5A	INM:SMES:AR02	-0.486237	17.1611	-1.30488	0.209159	0.632523	-4.85748
P11766	ADH5	INM:SMES:AR02	-0.566324	15.1181	-1.30478	0.209192	0.632523	-4.85758
P05023	ATP1A1	INM:SMES:AR02	0.233264	13.8976	1.30352	0.20961	0.632907	-4.85893
P29966	MARCKS	INM:SMES:AR02	0.420839	11.5478	1.30096	0.210467	0.633323	-4.86167
Q14165	MLEC	INM:SMES:AR02	-0.242654	13.7636	-1.30018	0.210727	0.633323	-4.8625
P10114	RAP2A	INM:SMES:AR02	0.419111	12.5578	1.29974	0.210876	0.633323	-4.86297
P08621	SNRNP70	INM:SMES:AR02	0.433564	14.7044	1.29719	0.211731	0.633323	-4.86569
Q9C0E2	XPO4	INM:SMES:AR02	0.356249	12.9047	1.2955	0.2123	0.633323	-4.8675
Q9UBR2	CTSZ	INM:SMES:AR02	0.225901	15.4978	1.29456	0.212617	0.633323	-4.8685
P26885	FKBP2	INM:SMES:AR02	0.506563	13.9607	1.29417	0.212749	0.633323	-4.86891
Q6PCE3	PGM2L1	INM:SMES:AR02	0.476814	11.7796	1.29375	0.212891	0.633323	-4.86936
Q96KP1	EXOC2	INM:SMES:AR02	0.262812	13.4976	1.29349	0.21298	0.633323	-4.86964
Q6NYC8	PPP1R18	INM:SMES:AR02	0.298805	13.0777	1.29281	0.213207	0.633323	-4.87036
Q9P258	RCC2	INM:SMES:AR02	0.263038	13.9489	1.29263	0.213269	0.633323	-4.87055
Q9UHV9	PFDN2	INM:SMES:AR02	-0.276699	13.7656	-1.29253	0.213303	0.633323	-4.87066
Q00577	PURA	INM:SMES:AR02	0.362701	11.7884	1.29165	0.2136	0.633323	-4.87159
P13796	LCP1	INM:SMES:AR02	0.294814	18.7459	1.29098	0.213827	0.633323	-4.8723
Q86VM9	ZC3H18	INM:SMES:AR02	0.497977	14.7823	1.28802	0.214834	0.634389	-4.87545
Q13177	PAK2	INM:SMES:AR02	-0.264586	13.5108	-1.28669	0.215284	0.634389	-4.87686
Q16401	PSMD5	INM:SMES:AR02	-0.289322	12.5537	-1.28659	0.215321	0.634389	-4.87697
P25815	S100P	INM:SMES:AR02	0.236322	18.7926	1.28593	0.215545	0.634389	-4.87767
Q92619	ARHGAP45	INM:SMES:AR02	0.228684	15.2825	1.28564	0.215645	0.634389	-4.87798
Q15631	TSN	INM:SMES:AR02	0.249369	13.6173	1.28462	0.215991	0.634547	-4.87905
P55145	MANF	INM:SMES:AR02	0.272923	13.0086	1.28336	0.216424	0.634889	-4.88039
Q9HA77	CARS2	INM:SMES:AR02	-0.529534	11.1996	-1.28258	0.216692	0.634889	-4.88122
Q52LJ0	FAM98B	INM:SMES:AR02	0.345736	14.6375	1.28106	0.21721	0.635552	-4.88282
P10644	PRKAR1A	INM:SMES:AR02	0.508875	10.7745	1.27979	0.217648	0.635978	-4.88416
P01023	A2M	INM:SMES:AR02	-0.398203	15.5865	-1.2781	0.21823	0.636102	-4.88595
Q9UNF0	PACSIN2	INM:SMES:AR02	0.237009	17.0818	1.27629	0.218853	0.636102	-4.88785
P49327	FASN	INM:SMES:AR02	0.309931	13.5526	1.27595	0.218969	0.636102	-4.88821
Q00722	PLCB2	INM:SMES:AR02	0.326088	15.3794	1.27465	0.21942	0.636102	-4.88958
O95487	SEC24B	INM:SMES:AR02	0.398848	13.2162	1.27398	0.219651	0.636102	-4.89028
Q02040	AKAP17A	INM:SMES:AR02	0.436414	12.0646	1.2739	0.219681	0.636102	-4.89037
O75396	SEC22B	INM:SMES:AR02	-0.382636	12.4611	-1.27373	0.219739	0.636102	-4.89055
P55795	HNRNPH2	INM:SMES:AR02	0.462509	12.1146	1.27168	0.22045	0.636564	-4.8927
Q9H1C4	UNC93B1	INM:SMES:AR02	0.259761	12.8272	1.27158	0.220484	0.636564	-4.89281
Q96BM9	ARL8A	INM:SMES:AR02	0.255107	13.3739	1.26943	0.22123	0.636626	-4.89506
P42785	PRCP	INM:SMES:AR02	0.306884	14.2489	1.26898	0.221386	0.636626	-4.89553
Q9H330	TMEM245	INM:SMES:AR02	0.389323	12.5581	1.26836	0.221603	0.636626	-4.89618
O00116	AGPS	INM:SMES:AR02	0.276154	14.1889	1.26815	0.221677	0.636626	-4.8964
O94886	TMEM63A	INM:SMES:AR02	-0.212811	13.4146	-1.2669	0.222113	0.637037	-4.89771
P46977	STT3A	INM:SMES:AR02	-0.21006	14.7138	-1.26588	0.222469	0.637217	-4.89878
Q15438	CYTH1	INM:SMES:AR02	-0.316773	14.5594	-1.26277	0.223559	0.639415	-4.90203
Q12800	TFCP2	INM:SMES:AR02	0.20826	13.6411	1.26097	0.224192	0.639415	-4.90391
P27105	STOM	INM:SMES:AR02	-0.281827	16.0481	-1.26079	0.224253	0.639415	-4.90409
Q14203	DCTN1	INM:SMES:AR02	0.299112	12.8947	1.26034	0.224413	0.639415	-4.90457
P57721	PCBP3	INM:SMES:AR02	0.384859	14.9903	1.25844	0.225083	0.639681	-4.90655
P62701	RPS4X	INM:SMES:AR02	-0.379677	15.9898	-1.25773	0.225331	0.639681	-4.90728
Q9NY33	DPP3	INM:SMES:AR02	0.313483	12.242	1.25733	0.225473	0.639681	-4.9077
Q86UE4	MTDH	INM:SMES:AR02	0.307529	13.3586	1.25674	0.225683	0.639681	-4.90832
Q92890	UFD1	INM:SMES:AR02	-0.248235	15.9174	-1.2551	0.226262	0.640485	-4.91002
Q96HN2	AHCYL2	INM:SMES:AR02	0.355107	13.1855	1.25253	0.227174	0.642232	-4.91269
A0AV96	RBM47	INM:SMES:AR02	0.350268	13.3482	1.25065	0.227844	0.643291	-4.91464
P46063	RECQL	INM:SMES:AR02	0.290426	13.3363	1.24945	0.22827	0.643401	-4.91588
Q9UKE5	TNIK	INM:SMES:AR02	-0.501995	14.1219	-1.24888	0.228475	0.643401	-4.91647
P38159	RBMX	INM:SMES:AR02	0.255587	14.1194	1.24717	0.229084	0.643522	-4.91824
Q9UBV8	PEF1	INM:SMES:AR02	-0.267172	14.3331	-1.2471	0.22911	0.643522	-4.91831
Q6P3S1	DENND1B	INM:SMES:AR02	0.272428	13.8713	1.24569	0.229615	0.644106	-4.91977
Q96P48	ARAP1	INM:SMES:AR02	0.248846	16.4444	1.23753	0.232551	0.648928	-4.92817
Q8IV50	LYSMD2	INM:SMES:AR02	-0.322126	12.0816	-1.23733	0.232626	0.648928	-4.92838
P98171	ARHGAP4	INM:SMES:AR02	0.225585	16.4515	1.2365	0.232925	0.648928	-4.92923
Q659C4	LARP1B	INM:SMES:AR02	0.567187	12.2152	1.23577	0.233189	0.648928	-4.92998
Q8N5G0	SMIM20	INM:SMES:AR02	0.255382	13.5372	1.23539	0.233328	0.648928	-4.93037
P08473	MME	INM:SMES:AR02	0.226241	16.44	1.23495	0.233489	0.648928	-4.93083
P35611	ADD1	INM:SMES:AR02	0.234381	15.4451	1.23473	0.233566	0.648928	-4.93104
Q14242	SELPLG	INM:SMES:AR02	-0.412198	14.2607	-1.23425	0.233741	0.648928	-4.93154
P55060	CSE1L	INM:SMES:AR02	-0.318968	12.9037	-1.23349	0.23402	0.648928	-4.93232
Q14258	TRIM25	INM:SMES:AR02	-0.372292	13.6487	-1.23193	0.234585	0.648977	-4.93391
Q8TBP5	FAM174A	INM:SMES:AR02	0.636905	9.44317	1.2318	0.234635	0.648977	-4.93405
P51809	VAMP7	INM:SMES:AR02	-0.257873	14.4195	-1.23063	0.235058	0.649323	-4.93524
P09326	CD48	INM:SMES:AR02	-0.46005	12.7308	-1.22876	0.235744	0.650018	-4.93716
P18754	RCC1	INM:SMES:AR02	0.572195	13.2337	1.22831	0.235908	0.650018	-4.93762
P30038	ALDH4A1	INM:SMES:AR02	0.384537	13.0862	1.22617	0.23669	0.651254	-4.9398
Q9NZC3	GDE1	INM:SMES:AR02	-0.43713	11.1894	-1.22545	0.236956	0.651254	-4.94054
O00442	RTCA	INM:SMES:AR02	0.461176	11.0307	1.22308	0.237827	0.652824	-4.94295
Q13613	MTMR1	INM:SMES:AR02	0.281715	12.6881	1.22167	0.238347	0.653427	-4.94439
Q9Y3E1	HDGFL3	INM:SMES:AR02	0.343882	11.7046	1.22004	0.238949	0.65425	-4.94604
P61088	UBE2N	INM:SMES:AR02	0.28271	13.4952	1.21659	0.240227	0.656441	-4.94954
Q96MW1	CCDC43	INM:SMES:AR02	0.405639	13.7801	1.21592	0.240476	0.656441	-4.95022
Q9NZU5	LMCD1	INM:SMES:AR02	-0.302842	16.2797	-1.21543	0.240655	0.656441	-4.95071
Q16181	SEPTIN7	INM:SMES:AR02	0.21339	15.0518	1.21136	0.242173	0.659754	-4.95483
P07602	PSAP	INM:SMES:AR02	0.188243	17.1632	1.20749	0.243621	0.662868	-4.95873
P08574	CYC1	INM:SMES:AR02	0.354602	14.1456	1.20517	0.244492	0.663826	-4.96107
P15531	NME1	INM:SMES:AR02	0.402194	12.3007	1.20424	0.244841	0.663826	-4.962
Q9H2D6	TRIOBP	INM:SMES:AR02	0.203944	13.5403	1.20355	0.245102	0.663826	-4.96269
P26599	PTBP1	INM:SMES:AR02	0.408655	15.5539	1.2033	0.245194	0.663826	-4.96294
Q16563	SYPL1	INM:SMES:AR02	-0.486349	12.5876	-1.19934	0.246693	0.665187	-4.96692
Q9H3K2	GHITM	INM:SMES:AR02	-0.261062	13.3894	-1.19923	0.246731	0.665187	-4.96702
Q08211	DHX9	INM:SMES:AR02	-0.257694	13.7368	-1.1992	0.246742	0.665187	-4.96705
O14976	GAK	INM:SMES:AR02	-0.479887	12.7557	-1.19873	0.246921	0.665187	-4.96752
P13807	GYS1	INM:SMES:AR02	0.69395	11.5988	1.19586	0.248011	0.667296	-4.97039
O14497	ARID1A	INM:SMES:AR02	0.291628	12.4248	1.19438	0.248574	0.667985	-4.97187
P05091	ALDH2	INM:SMES:AR02	0.253682	15.3964	1.19224	0.249391	0.668313	-4.97401
Q14114	LRP8	INM:SMES:AR02	-0.561955	17.7248	-1.19104	0.249847	0.668313	-4.9752
P42166	TMPO	INM:SMES:AR02	-0.331402	12.6407	-1.18852	0.250812	0.668313	-4.9777
P21796	VDAC1	INM:SMES:AR02	-0.297249	12.4466	-1.18817	0.250946	0.668313	-4.97805
P12956	XRCC6	INM:SMES:AR02	0.288796	17.7829	1.18798	0.251022	0.668313	-4.97825
P30566	ADSL	INM:SMES:AR02	-0.378886	12.126	-1.18753	0.251195	0.668313	-4.9787
Q96RQ3	MCCC1	INM:SMES:AR02	-0.34493	13.1714	-1.18654	0.251573	0.668313	-4.97967
Q15366	PCBP2	INM:SMES:AR02	-0.384221	13.1521	-1.18573	0.251884	0.668313	-4.98047
Q01082	SPTBN1	INM:SMES:AR02	0.207157	15.4737	1.18455	0.252339	0.668313	-4.98165
P84077	ARF1	INM:SMES:AR02	-0.367117	14.1814	-1.18452	0.252352	0.668313	-4.98168
P62306	SNRPF	INM:SMES:AR02	0.655389	14.586	1.18446	0.252376	0.668313	-4.98174
O14818	PSMA7	INM:SMES:AR02	0.499566	13.1267	1.18422	0.252467	0.668313	-4.98198
P53597	SUCLG1	INM:SMES:AR02	-0.377769	11.836	-1.18363	0.252692	0.668313	-4.98256
Q9NSD9	FARSB	INM:SMES:AR02	-0.388928	13.5024	-1.18154	0.253499	0.669092	-4.98462
Q5VYY1	ANKRD22	INM:SMES:AR02	0.262586	14.2871	1.18128	0.253603	0.669092	-4.98489
Q15036	SNX17	INM:SMES:AR02	0.24794	12.3396	1.17971	0.254207	0.669797	-4.98643
Q15042	RAB3GAP1	INM:SMES:AR02	0.358771	12.9156	1.17847	0.254689	0.669797	-4.98766
P51991	HNRNPA3	INM:SMES:AR02	-0.195104	14.1784	-1.1775	0.255066	0.669797	-4.98862
Q7Z3J2	VPS35L	INM:SMES:AR02	0.205887	13.9209	1.17741	0.255102	0.669797	-4.98871
P62487	POLR2G	INM:SMES:AR02	-0.281498	11.9591	-1.17496	0.256055	0.671246	-4.99112
P62244	RPS15A	INM:SMES:AR02	-0.45501	14.3148	-1.1744	0.256271	0.671246	-4.99167
Q14689	DIP2A	INM:SMES:AR02	0.334184	11.6855	1.17305	0.256796	0.671812	-4.993
Q9H4E7	DEF6	INM:SMES:AR02	0.265782	15.9796	1.17127	0.257496	0.672831	-4.99475
Q00403	GTF2B	INM:SMES:AR02	0.262259	13.1014	1.1681	0.258736	0.674758	-4.99786
Q9H9F9	ACTR5	INM:SMES:AR02	0.381021	11.1618	1.1678	0.258854	0.674758	-4.99815
O95674	CDS2	INM:SMES:AR02	0.405301	12.2302	1.167	0.259168	0.674767	-4.99893
O75934	BCAS2	INM:SMES:AR02	0.265128	13.032	1.16605	0.25954	0.674929	-4.99986
Q9UHD8	SEPTIN9	INM:SMES:AR02	0.176779	14.3854	1.16402	0.260343	0.675555	-5.00185
O60762	DPM1	INM:SMES:AR02	0.279432	12.9137	1.16387	0.260402	0.675555	-5.002
P60660	MYL6	INM:SMES:AR02	-0.512245	16.7966	-1.16068	0.261662	0.678014	-5.00511
O75369	FLNB	INM:SMES:AR02	-0.286218	12.0403	-1.15778	0.262812	0.679501	-5.00794
P40227	CCT6A	INM:SMES:AR02	-0.227456	15.8546	-1.15756	0.262897	0.679501	-5.00814
Q0VD83	APOBR	INM:SMES:AR02	-0.372356	14.4412	-1.15687	0.263174	0.679501	-5.00882
Q709C8	VPS13C	INM:SMES:AR02	0.312762	12.7701	1.1556	0.263678	0.679503	-5.01005
P33316	DUT	INM:SMES:AR02	-0.647532	11.6036	-1.15475	0.264019	0.679503	-5.01088
Q15084	PDIA6	INM:SMES:AR02	-0.310132	13.301	-1.15304	0.2647	0.679503	-5.01254
Q15018	ABRAXAS2	INM:SMES:AR02	0.243169	12.3243	1.1523	0.264995	0.679503	-5.01325
Q9Y6C9	MTCH2	INM:SMES:AR02	-0.453557	13.1086	-1.15118	0.265442	0.679503	-5.01433
O95347	SMC2	INM:SMES:AR02	-0.540829	13.5909	-1.15083	0.265582	0.679503	-5.01467
Q96GG9	DCUN1D1	INM:SMES:AR02	0.291039	13.294	1.15068	0.265645	0.679503	-5.01482
P05164	MPO	INM:SMES:AR02	-0.231502	21.5299	-1.1506	0.265675	0.679503	-5.0149
P51648	ALDH3A2	INM:SMES:AR02	-0.282907	13.2455	-1.1496	0.266076	0.67973	-5.01587
Q8IXQ4	GPALPP1	INM:SMES:AR02	-0.281349	11.6862	-1.14593	0.26755	0.682693	-5.01941
P35659	DEK	INM:SMES:AR02	-0.314059	14.9864	-1.14459	0.268088	0.68276	-5.02069
O75915	ARL6IP5	INM:SMES:AR02	0.284167	16.2766	1.14431	0.268205	0.68276	-5.02097
Q08380	LGALS3BP	INM:SMES:AR02	0.307436	11.5278	1.14163	0.269284	0.683587	-5.02354
O43493	TGOLN2	INM:SMES:AR02	0.545292	10.2723	1.14125	0.269438	0.683587	-5.02391
Q9NZJ9	NUDT4	INM:SMES:AR02	0.264126	13.1819	1.14089	0.269585	0.683587	-5.02426
O00750	PIK3C2B	INM:SMES:AR02	0.342846	15.8558	1.14039	0.269787	0.683587	-5.02474
P09382	LGALS1	INM:SMES:AR02	-0.391743	14.2608	-1.13948	0.270156	0.683596	-5.02561
P11215	ITGAM	INM:SMES:AR02	-0.255618	17.3839	-1.13875	0.270452	0.683596	-5.02631
Q9NX00	TMEM160	INM:SMES:AR02	0.189142	15.1198	1.13806	0.270734	0.683596	-5.02698
O75477	ERLIN1	INM:SMES:AR02	-0.243742	14.8478	-1.13613	0.271515	0.683712	-5.02882
Q8TC56	GARIN3	INM:SMES:AR02	0.318943	11.4692	1.13565	0.271713	0.683712	-5.02928
Q13315	ATM	INM:SMES:AR02	-0.276436	12.2376	-1.13562	0.271724	0.683712	-5.02931
P39019	RPS19	INM:SMES:AR02	-0.25026	13.6426	-1.13362	0.272541	0.684975	-5.03122
Q99698	LYST	INM:SMES:AR02	-0.248005	12.0905	-1.13136	0.273465	0.685661	-5.03338
Q49A26	GLYR1	INM:SMES:AR02	-0.388253	12.2373	-1.1296	0.274184	0.685661	-5.03506
P09651	HNRNPA1	INM:SMES:AR02	0.246616	15.3187	1.1296	0.274186	0.685661	-5.03506
P83111	LACTB	INM:SMES:AR02	-0.517988	12.166	-1.12935	0.274287	0.685661	-5.0353
Q9UKM9	RALY	INM:SMES:AR02	-0.368407	14.9712	-1.1291	0.274391	0.685661	-5.03554
P63165	SUMO1	INM:SMES:AR02	-0.629663	12.2859	-1.12677	0.275348	0.686813	-5.03775
P33240	CSTF2	INM:SMES:AR02	-0.254397	13.224	-1.12593	0.275693	0.686813	-5.03855
Q96Q15	SMG1	INM:SMES:AR02	0.390886	12.1178	1.12509	0.276039	0.686813	-5.03935
P04632	CAPNS1	INM:SMES:AR02	-0.329707	14.4792	-1.1249	0.276115	0.686813	-5.03952
A8CG34		INM:SMES:AR02	0.22573	12.6827	1.12364	0.276635	0.687321	-5.04072
O75038	PLCH2	INM:SMES:AR02	0.213358	15.7154	1.12156	0.277497	0.688675	-5.0427
Q9UMX0	UBQLN1	INM:SMES:AR02	0.367001	12.4526	1.11978	0.278233	0.689232	-5.04438
P31483	TIA1	INM:SMES:AR02	-0.312698	13.6711	-1.11793	0.279002	0.689232	-5.04613
Q96FS4	SIPA1	INM:SMES:AR02	0.205385	14.5671	1.11787	0.279027	0.689232	-5.04619
Q9H9S4	CAB39L	INM:SMES:AR02	0.248034	12.2666	1.11782	0.279044	0.689232	-5.04623
Q6ZS81	WDFY4	INM:SMES:AR02	0.257243	12.1074	1.11708	0.279355	0.689232	-5.04693
Q8TCU6	PREX1	INM:SMES:AR02	-0.394055	13.2788	-1.1164	0.279638	0.689232	-5.04757
Q9H3S1	SEMA4A	INM:SMES:AR02	-0.483302	10.513	-1.11438	0.280479	0.689232	-5.04948
Q9UNM6	PSMD13	INM:SMES:AR02	0.247767	14.4254	1.11434	0.280493	0.689232	-5.04951
P62841	RPS15	INM:SMES:AR02	-0.299141	11.5147	-1.11415	0.280575	0.689232	-5.04969
O95486	SEC24A	INM:SMES:AR02	-0.319579	11.9938	-1.11299	0.281057	0.689301	-5.05078
B0I1T2	MYO1G	INM:SMES:AR02	0.283492	14.7949	1.11256	0.281237	0.689301	-5.05119
Q01085	TIAL1	INM:SMES:AR02	-0.650961	10.5962	-1.10803	0.283136	0.693125	-5.05544
Q86TP1	PRUNE1	INM:SMES:AR02	0.180012	14.0153	1.10731	0.283435	0.693125	-5.05611
Q86YP4	GATAD2A	INM:SMES:AR02	-0.311369	12.4304	-1.1055	0.284198	0.694209	-5.05781
Q07866	KLC1	INM:SMES:AR02	0.206685	13.5174	1.1022	0.28559	0.696828	-5.06089
P78318	IGBP1	INM:SMES:AR02	0.210781	13.902	1.10137	0.285943	0.696905	-5.06167
Q2PPJ7	RALGAPA2	INM:SMES:AR02	0.237144	14.0049	1.10043	0.28634	0.697091	-5.06254
Q9UJS0	SLC25A13	INM:SMES:AR02	-0.496042	13.8419	-1.09835	0.287222	0.697809	-5.06448
Q15008	PSMD6	INM:SMES:AR02	0.329948	13.5725	1.09822	0.287277	0.697809	-5.0646
P48449	LSS	INM:SMES:AR02	0.388527	12.1442	1.09613	0.288164	0.699183	-5.06654
P61163	ACTR1A	INM:SMES:AR02	0.246194	15.6856	1.09428	0.288953	0.70014	-5.06826
Q9C0J8	WDR33	INM:SMES:AR02	0.276652	13.8786	1.09251	0.289706	0.70014	-5.0699
Q9NXH8	TOR4A	INM:SMES:AR02	0.241529	12.9937	1.09213	0.28987	0.70014	-5.07025
P42167	TMPO	INM:SMES:AR02	0.229209	15.8042	1.09173	0.290039	0.70014	-5.07062
Q5T200	ZC3H13	INM:SMES:AR02	-0.307112	13.8455	-1.09118	0.290275	0.70014	-5.07113
Q9Y6D9	MAD1L1	INM:SMES:AR02	-0.318234	13.3515	-1.09061	0.290518	0.70014	-5.07166
Q8TCD5	NT5C	INM:SMES:AR02	-0.348118	11.2407	-1.08961	0.290949	0.70014	-5.07259
P24752	ACAT1	INM:SMES:AR02	0.527689	13.1799	1.08917	0.291135	0.70014	-5.07299
Q9NV96	TMEM30A	INM:SMES:AR02	0.228579	15.9505	1.08772	0.291759	0.700866	-5.07433
P05204	HMGN2	INM:SMES:AR02	-0.490277	16.5177	-1.08634	0.292349	0.701128	-5.0756
Q14677	CLINT1	INM:SMES:AR02	0.337574	11.4384	1.08402	0.293348	0.701128	-5.07774
P39023	RPL3	INM:SMES:AR02	-0.275813	16.8194	-1.08377	0.293457	0.701128	-5.07797
P82979	SARNP	INM:SMES:AR02	-0.292726	15.0559	-1.08362	0.293521	0.701128	-5.0781
Q07864	POLE	INM:SMES:AR02	-0.180754	15.1907	-1.08325	0.293682	0.701128	-5.07845
Q9UL36	ZNF236	INM:SMES:AR02	-0.400881	13.2202	-1.08174	0.294332	0.701128	-5.07983
P61313	RPL15	INM:SMES:AR02	-0.457581	13.619	-1.07947	0.295316	0.701128	-5.08192
A0FGR8	ESYT2	INM:SMES:AR02	0.208545	12.3389	1.07933	0.295374	0.701128	-5.08204
P46734	MAP2K3	INM:SMES:AR02	0.18671	14.4943	1.07929	0.295391	0.701128	-5.08208
P62913	RPL11	INM:SMES:AR02	-0.426524	13.5308	-1.07929	0.295394	0.701128	-5.08208
P09429	HMGB1	INM:SMES:AR02	0.199212	18.2135	1.07901	0.295514	0.701128	-5.08234
P0CG12		INM:SMES:AR02	0.172357	14.0946	1.07849	0.295738	0.701128	-5.08281
Q8TF05	PPP4R1	INM:SMES:AR02	-0.257422	15.4715	-1.07726	0.296273	0.701631	-5.08394
Q96RK4	BBS4	INM:SMES:AR02	-0.631541	12.7532	-1.07642	0.296635	0.701725	-5.0847
Q6NS38	ALKBH2	INM:SMES:AR02	0.412121	11.6713	1.07559	0.296996	0.701814	-5.08546
Q12888	TP53BP1	INM:SMES:AR02	-0.441072	10.7398	-1.07257	0.298312	0.704069	-5.08822
Q9NS86	LANCL2	INM:SMES:AR02	0.301332	11.857	1.07192	0.298598	0.704069	-5.08882
Q13905	RAPGEF1	INM:SMES:AR02	-0.342863	14.8001	-1.07067	0.299144	0.704594	-5.08996
O15357	INPPL1	INM:SMES:AR02	-0.241212	12.9289	-1.06573	0.301307	0.707833	-5.09444
P15848	ARSB	INM:SMES:AR02	0.234356	14.6137	1.06538	0.301462	0.707833	-5.09476
Q96TC7	RMDN3	INM:SMES:AR02	-0.274876	13.485	-1.0653	0.301497	0.707833	-5.09483
P51812	RPS6KA3	INM:SMES:AR02	-0.570431	12.1157	-1.06314	0.302449	0.708349	-5.09679
Q8WXI2	CNKSR2	INM:SMES:AR02	0.275616	14.6756	1.06115	0.303326	0.708349	-5.09859
Q92572	AP3S1	INM:SMES:AR02	-0.231674	14.1289	-1.05985	0.303899	0.708349	-5.09976
Q9NY12	GAR1	INM:SMES:AR02	-0.187829	15.9603	-1.05957	0.304026	0.708349	-5.10002
Q96AX2	RAB37	INM:SMES:AR02	0.357048	12.3755	1.05949	0.304057	0.708349	-5.10008
Q13148	TARDBP	INM:SMES:AR02	0.269072	13.8794	1.0594	0.304097	0.708349	-5.10016
Q6IQ23	PLEKHA7	INM:SMES:AR02	0.207718	15.0718	1.05932	0.304135	0.708349	-5.10024
Q6F5E8	CARMIL2	INM:SMES:AR02	0.256398	11.8703	1.05829	0.304591	0.708349	-5.10117
Q13464	ROCK1	INM:SMES:AR02	0.231532	15.9613	1.05816	0.304649	0.708349	-5.10128
O94888	UBXN7	INM:SMES:AR02	0.305366	12.2834	1.05656	0.305355	0.709233	-5.10272
P46940	IQGAP1	INM:SMES:AR02	0.196247	15.9298	1.055	0.306051	0.71009	-5.10413
Q8WXG6	MADD	INM:SMES:AR02	-0.302991	13.0332	-1.05408	0.306457	0.710275	-5.10495
Q12769	NUP160	INM:SMES:AR02	0.471357	11.9476	1.05025	0.308165	0.713472	-5.10839
P16070	CD44	INM:SMES:AR02	-0.217838	16.1855	-1.04759	0.309356	0.715468	-5.11077
P30740	SERPINB1	INM:SMES:AR02	0.207245	14.6038	1.04306	0.311391	0.71941	-5.11481
Q9BXS9	SLC26A6	INM:SMES:AR02	-0.290172	17.2798	-1.04228	0.311739	0.719449	-5.1155
E9PAV3		INM:SMES:AR02	0.470435	10.9803	1.03946	0.313012	0.721061	-5.118
Q96N66	MBOAT7	INM:SMES:AR02	0.294323	17.0842	1.03888	0.313273	0.721061	-5.11852
Q04637	EIF4G1	INM:SMES:AR02	-0.339101	11.9005	-1.03853	0.313433	0.721061	-5.11883
O00203	AP3B1	INM:SMES:AR02	-0.254595	12.5476	-1.03748	0.313909	0.721187	-5.11976
Q9NVP1	DDX18	INM:SMES:AR02	-0.340169	12.1335	-1.03673	0.314247	0.721187	-5.12042
P50213	IDH3A	INM:SMES:AR02	-0.496631	11.8967	-1.03559	0.314766	0.721187	-5.12144
Q96QR8	PURB	INM:SMES:AR02	0.249051	12.0768	1.03487	0.315092	0.721187	-5.12207
Q96Q42	ALS2	INM:SMES:AR02	-0.239839	13.8903	-1.03435	0.315327	0.721187	-5.12253
P21675	TAF1	INM:SMES:AR02	0.347506	12.1703	1.03402	0.315478	0.721187	-5.12282
P11117	ACP2	INM:SMES:AR02	-0.165622	13.5776	-1.03193	0.316426	0.722594	-5.12466
P68104	EEF1A1	INM:SMES:AR02	0.216432	14.4066	1.03077	0.316953	0.723002	-5.12568
P48643	CCT5	INM:SMES:AR02	0.183471	14.7906	1.02986	0.317371	0.723002	-5.12649
P34059	GALNS	INM:SMES:AR02	-0.171678	13.7257	-1.02935	0.317602	0.723002	-5.12694
Q15418	RPS6KA1	INM:SMES:AR02	0.206977	14.0564	1.02846	0.318011	0.723175	-5.12772
Q86WB0	ZC3HC1	INM:SMES:AR02	0.246316	13.4445	1.02703	0.318664	0.723486	-5.12898
Q9UGI8	TES	INM:SMES:AR02	0.236688	13.7518	1.0267	0.318813	0.723486	-5.12927
Q13555	CAMK2G	INM:SMES:AR02	0.269773	12.6464	1.02562	0.31931	0.723859	-5.13022
Q92903	CDS1	INM:SMES:AR02	0.238876	11.8762	1.02446	0.319842	0.72431	-5.13124
Q14738	PPP2R5D	INM:SMES:AR02	0.359895	11.0882	1.02143	0.321232	0.725281	-5.13388
Q53GS9	USP39	INM:SMES:AR02	0.344672	12.1644	1.02107	0.3214	0.725281	-5.1342
Q9BT09	CNPY3	INM:SMES:AR02	0.308588	13.36	1.02075	0.321547	0.725281	-5.13448
Q96A33	CCDC47	INM:SMES:AR02	0.545402	14.1591	1.02007	0.321857	0.725281	-5.13507
P01040	CSTA	INM:SMES:AR02	0.285131	14.4199	1.01989	0.321939	0.725281	-5.13522
P07305	H1-0	INM:SMES:AR02	-0.322171	15.1697	-1.01857	0.32255	0.725663	-5.13638
Q7Z4F1	LRP10	INM:SMES:AR02	-0.236765	12.6852	-1.01774	0.322935	0.725663	-5.13711
Q9Y2K7	KDM2A	INM:SMES:AR02	0.321646	11.3925	1.01705	0.323254	0.725663	-5.13771
Q9Y4L1	HYOU1	INM:SMES:AR02	0.181983	13.4292	1.01662	0.323452	0.725663	-5.13808
P55957	BID	INM:SMES:AR02	0.258688	12.8218	1.01591	0.323778	0.725663	-5.13869
P48506	GCLC	INM:SMES:AR02	0.266597	12.6514	1.01449	0.324437	0.726175	-5.13993
P35998	PSMC2	INM:SMES:AR02	0.211223	12.5527	1.01307	0.325095	0.726175	-5.14116
P30048	PRDX3	INM:SMES:AR02	-0.319396	14.669	-1.01293	0.32516	0.726175	-5.14128
Q99439	CNN2	INM:SMES:AR02	-0.450075	12.9897	-1.01254	0.325342	0.726175	-5.14163
P16885	PLCG2	INM:SMES:AR02	0.195197	14.8926	1.01103	0.326041	0.726358	-5.14293
Q13724	MOGS	INM:SMES:AR02	0.187138	13.9287	1.01092	0.326093	0.726358	-5.14303
Q9BZJ0	CRNKL1	INM:SMES:AR02	0.281802	14.4843	1.00854	0.327201	0.726539	-5.14509
P62750	RPL23A	INM:SMES:AR02	-0.178463	12.9985	-1.00646	0.328172	0.726539	-5.14688
P36969	GPX4	INM:SMES:AR02	0.329489	14.5113	1.00598	0.328398	0.726539	-5.1473
O43617	TRAPPC3	INM:SMES:AR02	0.322139	14.1972	1.0054	0.32867	0.726539	-5.1478
Q641Q2	WASHC2A	INM:SMES:AR02	0.242549	14.1019	1.00533	0.328703	0.726539	-5.14786
O15530	PDPK1	INM:SMES:AR02	0.282987	13.3212	1.00501	0.32885	0.726539	-5.14813
P49756	RBM25	INM:SMES:AR02	0.291977	12.2571	1.00497	0.32887	0.726539	-5.14817
Q16543	CDC37	INM:SMES:AR02	-0.195089	13.9828	-1.00405	0.329301	0.726539	-5.14896
Q5JSP0	FGD3	INM:SMES:AR02	0.176299	13.454	1.00299	0.329798	0.726539	-5.14988
Q5T447	HECTD3	INM:SMES:AR02	0.181565	12.6178	1.00267	0.329948	0.726539	-5.15015
O43395	PRPF3	INM:SMES:AR02	-0.340025	13.4358	-1.00231	0.330115	0.726539	-5.15046
P46777	RPL5	INM:SMES:AR02	0.196449	15.181	1.00197	0.330275	0.726539	-5.15075
Q4G176	ACSF3	INM:SMES:AR02	-0.379235	10.4199	-1.00129	0.330595	0.726539	-5.15134
Q27J81	INF2	INM:SMES:AR02	-0.172065	13.7853	-1.00074	0.330853	0.726539	-5.15181
Q9H061	TMEM126A	INM:SMES:AR02	0.206016	13.6888	0.998812	0.331759	0.727795	-5.15346
Q9NZ32	ACTR10	INM:SMES:AR02	-0.198354	12.973	-0.997626	0.332318	0.728286	-5.15448
Q9Y678	COPG1	INM:SMES:AR02	0.283817	13.1137	0.996059	0.333057	0.729171	-5.15582
Q7RTR2	NLRC3	INM:SMES:AR02	-0.499472	14.2599	-0.995194	0.333466	0.729331	-5.15656
P04083	ANXA1	INM:SMES:AR02	-0.299948	15.929	-0.993063	0.334474	0.730158	-5.15838
Q92945	KHSRP	INM:SMES:AR02	0.180021	16.5199	0.992973	0.334516	0.730158	-5.15845
Q8WW43	APH1B	INM:SMES:AR02	-0.411981	11.3056	-0.991591	0.335171	0.730302	-5.15963
P55786	NPEPPS	INM:SMES:AR02	0.195061	13.4933	0.991289	0.335314	0.730302	-5.15989
O00410	IPO5	INM:SMES:AR02	-0.259339	13.0369	-0.990395	0.335739	0.730302	-5.16065
Q9UK76	JPT1	INM:SMES:AR02	-0.326212	13.103	-0.99	0.335926	0.730302	-5.16098
Q9Y5B0	CTDP1	INM:SMES:AR02	-0.257818	13.3694	-0.987382	0.337171	0.731222	-5.16321
Q9Y314	NOSIP	INM:SMES:AR02	0.303635	11.1314	0.986778	0.337458	0.731222	-5.16372
Q9BUR5	APOO	INM:SMES:AR02	-0.355052	10.5503	-0.985264	0.33818	0.731222	-5.165
Q01105	SET	INM:SMES:AR02	0.237046	13.3036	0.984694	0.338452	0.731222	-5.16549
P27824	CANX	INM:SMES:AR02	0.17997	17.6462	0.98426	0.33866	0.731222	-5.16585
O75439	PMPCB	INM:SMES:AR02	-0.241937	13.4851	-0.984137	0.338718	0.731222	-5.16596
P61626	LYZ	INM:SMES:AR02	0.34386	16.8346	0.98299	0.339266	0.731222	-5.16693
P36578	RPL4	INM:SMES:AR02	-0.223181	13.4769	-0.982612	0.339447	0.731222	-5.16725
Q9BYP7	WNK3	INM:SMES:AR02	0.406567	13.6054	0.981039	0.3402	0.731222	-5.16858
Q14696	MESD	INM:SMES:AR02	-0.22677	12.705	-0.979639	0.340871	0.731222	-5.16976
Q9UM54	MYO6	INM:SMES:AR02	0.549286	15.2315	0.978849	0.341251	0.731222	-5.17042
O75223	GGCT	INM:SMES:AR02	-0.39183	12.2097	-0.978483	0.341426	0.731222	-5.17073
C4AMC7		INM:SMES:AR02	0.2375	12.3736	0.978313	0.341508	0.731222	-5.17087
P08575	PTPRC	INM:SMES:AR02	0.218566	16.9541	0.977326	0.341982	0.731222	-5.1717
Q9NTJ3	SMC4	INM:SMES:AR02	-0.359428	14.7088	-0.977057	0.342112	0.731222	-5.17193
O95490	ADGRL2	INM:SMES:AR02	-0.18774	16.352	-0.977009	0.342135	0.731222	-5.17197
Q13404	UBE2V1	INM:SMES:AR02	0.243233	15.3436	0.976826	0.342223	0.731222	-5.17212
Q9UPN7	PPP6R1	INM:SMES:AR02	0.450755	11.3288	0.976452	0.342403	0.731222	-5.17244
Q9UFN0	NIPSNAP3A	INM:SMES:AR02	-0.234483	13.1793	-0.973772	0.343694	0.733219	-5.17469
P42025	ACTR1B	INM:SMES:AR02	0.2843	12.8064	0.973113	0.344012	0.733219	-5.17524
P63092	GNAS	INM:SMES:AR02	0.356085	14.8777	0.9723	0.344405	0.733336	-5.17592
Q99417	MYCBP	INM:SMES:AR02	-0.432102	12.0929	-0.969474	0.345773	0.734255	-5.17828
A0A1B0GUS4		INM:SMES:AR02	0.306465	13.5899	0.969297	0.345858	0.734255	-5.17843
P35237	SERPINB6	INM:SMES:AR02	0.257904	12.045	0.968282	0.346351	0.734255	-5.17928
P21399	ACO1	INM:SMES:AR02	0.234489	13.9829	0.968137	0.346421	0.734255	-5.1794
P04040	CAT	INM:SMES:AR02	0.158836	16.842	0.967901	0.346535	0.734255	-5.1796
Q9BVG4	PBDC1	INM:SMES:AR02	0.32706	11.461	0.966722	0.347108	0.734255	-5.18058
Q14344	GNA13	INM:SMES:AR02	0.26287	13.8763	0.965195	0.34785	0.734255	-5.18185
P30626	SRI	INM:SMES:AR02	0.213011	16.3412	0.961424	0.349689	0.734255	-5.18498
P62081	RPS7	INM:SMES:AR02	-0.368735	11.5541	-0.960566	0.350108	0.734255	-5.18569
Q03252	LMNB2	INM:SMES:AR02	-0.17887	15.1715	-0.960131	0.35032	0.734255	-5.18605
Q5SYE7	NHSL1	INM:SMES:AR02	0.24204	16.0545	0.960046	0.350362	0.734255	-5.18612
P16615	ATP2A2	INM:SMES:AR02	0.218557	15.0737	0.959392	0.350682	0.734255	-5.18666
Q13459	MYO9B	INM:SMES:AR02	0.193301	13.1193	0.959142	0.350804	0.734255	-5.18687
P23786	CPT2	INM:SMES:AR02	0.259891	13.016	0.958909	0.350918	0.734255	-5.18706
Q16637	SMN1	INM:SMES:AR02	-0.529774	10.2182	-0.958888	0.350929	0.734255	-5.18708
O96000	NDUFB10	INM:SMES:AR02	0.33609	10.8584	0.958761	0.35099	0.734255	-5.18718
Q9Y259	CHKB	INM:SMES:AR02	0.536203	10.1357	0.957709	0.351506	0.734255	-5.18805
P48739	PITPNB	INM:SMES:AR02	0.182974	13.2903	0.957644	0.351538	0.734255	-5.18811
Q03188	CENPC	INM:SMES:AR02	-0.401933	12.7723	-0.957555	0.351582	0.734255	-5.18818
P06753	TPM3	INM:SMES:AR02	0.276127	18.5327	0.956948	0.351879	0.734255	-5.18868
P22392	NME2	INM:SMES:AR02	0.200192	13.6722	0.956846	0.351929	0.734255	-5.18877
Q14789	GOLGB1	INM:SMES:AR02	-0.6017	12.2373	-0.955742	0.352471	0.73468	-5.18968
O15027	SEC16A	INM:SMES:AR02	0.178783	15.2386	0.954565	0.353049	0.734915	-5.19065
Q9Y512	SAMM50	INM:SMES:AR02	-0.293633	12.2267	-0.954137	0.35326	0.734915	-5.191
Q13561	DCTN2	INM:SMES:AR02	-0.391842	14.338	-0.952586	0.354023	0.735008	-5.19228
P57772	EEFSEC	INM:SMES:AR02	0.216986	12.6053	0.951988	0.354318	0.735008	-5.19277
P35637	FUS	INM:SMES:AR02	-0.359867	11.2222	-0.950114	0.355242	0.735008	-5.1943
Q9UHX1	PUF60	INM:SMES:AR02	-0.305327	13.7362	-0.949913	0.355341	0.735008	-5.19447
P36897	TGFBR1	INM:SMES:AR02	0.330878	12.2944	0.948073	0.35625	0.735008	-5.19598
Q9Y6N5	SQOR	INM:SMES:AR02	-0.186162	17.1839	-0.947918	0.356327	0.735008	-5.1961
Q8N5H7	SH2D3C	INM:SMES:AR02	-0.341187	11.3753	-0.946531	0.357014	0.735008	-5.19724
P49757	NUMB	INM:SMES:AR02	0.178713	13.8782	0.94523	0.357659	0.735008	-5.1983
Q9UJF2	RASAL2	INM:SMES:AR02	-0.419487	14.4738	-0.94425	0.358145	0.735008	-5.1991
Q9NRY4	ARHGAP35	INM:SMES:AR02	-0.415384	15.6612	-0.943595	0.35847	0.735008	-5.19964
P52907	CAPZA1	INM:SMES:AR02	-0.58877	9.98809	-0.94276	0.358885	0.735008	-5.20032
Q969H8	MYDGF	INM:SMES:AR02	-0.296504	11.4974	-0.942582	0.358974	0.735008	-5.20046
P10606	COX5B	INM:SMES:AR02	-0.187368	18.4294	-0.941991	0.359268	0.735008	-5.20094
P35573	AGL	INM:SMES:AR02	0.236248	11.7402	0.941858	0.359334	0.735008	-5.20105
P08708	RPS17	INM:SMES:AR02	0.291556	12.5857	0.941209	0.359657	0.735008	-5.20158
Q9H4A4	RNPEP	INM:SMES:AR02	0.261018	14.9253	0.940654	0.359933	0.735008	-5.20203
P55072	VCP	INM:SMES:AR02	0.181041	15.829	0.940549	0.359985	0.735008	-5.20211
O75064	DENND4B	INM:SMES:AR02	-0.30975	12.2974	-0.939136	0.36069	0.735008	-5.20326
Q8IXM2	C17orf49	INM:SMES:AR02	-0.30161	11.4029	-0.93884	0.360838	0.735008	-5.2035
P01034	CST3	INM:SMES:AR02	0.332093	12.0357	0.938316	0.361099	0.735008	-5.20393
Q9BRZ2	TRIM56	INM:SMES:AR02	-0.34678	13.6695	-0.938243	0.361135	0.735008	-5.20399
O94915	FRYL	INM:SMES:AR02	-0.203449	13.7644	-0.937968	0.361273	0.735008	-5.20421
P60903	S100A10	INM:SMES:AR02	-0.269353	13.6029	-0.937719	0.361397	0.735008	-5.20441
O43865	AHCYL1	INM:SMES:AR02	0.292487	12.6297	0.937053	0.36173	0.735008	-5.20495
P04075	ALDOA	INM:SMES:AR02	-0.376441	17.2633	-0.935759	0.362377	0.735008	-5.206
Q05639	EEF1A2	INM:SMES:AR02	-0.361203	17.1062	-0.935694	0.36241	0.735008	-5.20605
O60313	OPA1	INM:SMES:AR02	-0.296045	12.9809	-0.935526	0.362494	0.735008	-5.20619
O75907	DGAT1	INM:SMES:AR02	0.291211	12.9989	0.934973	0.362771	0.735008	-5.20664
Q9BUL8	PDCD10	INM:SMES:AR02	0.28891	13.1228	0.931627	0.364449	0.737721	-5.20934
Q13451	FKBP5	INM:SMES:AR02	0.321464	13.2632	0.929538	0.3655	0.739159	-5.21102
P45954	ACADSB	INM:SMES:AR02	0.361436	10.2136	0.928052	0.366248	0.739534	-5.21221
P19367	HK1	INM:SMES:AR02	0.400792	12.7461	0.92669	0.366935	0.739534	-5.21331
Q8WZA9	IRGQ	INM:SMES:AR02	-0.502296	11.1545	-0.926567	0.366997	0.739534	-5.21341
Q9Y2R9	MRPS7	INM:SMES:AR02	-0.444831	11.4648	-0.92639	0.367087	0.739534	-5.21355
P62753	RPS6	INM:SMES:AR02	-0.22912	17.1955	-0.925798	0.367386	0.739534	-5.21402
Q96MG7	NSMCE3	INM:SMES:AR02	0.366985	10.6226	0.924172	0.368208	0.739943	-5.21532
P07996	THBS1	INM:SMES:AR02	-0.290928	13.4831	-0.924049	0.36827	0.739943	-5.21542
P14406	COX7A2	INM:SMES:AR02	-0.433865	13.1336	-0.923016	0.368793	0.740168	-5.21625
O96019	ACTL6A	INM:SMES:AR02	-0.257829	14.0986	-0.920849	0.369891	0.740168	-5.21798
Q9NVA2	SEPTIN11	INM:SMES:AR02	0.151989	14.4801	0.919384	0.370635	0.740168	-5.21915
Q9Y2Q3	GSTK1	INM:SMES:AR02	0.296911	15.7435	0.918907	0.370877	0.740168	-5.21953
Q9HD33	MRPL47	INM:SMES:AR02	-0.387704	12.6108	-0.918385	0.371143	0.740168	-5.21994
P34932	HSPA4	INM:SMES:AR02	0.291766	12.9203	0.918326	0.371173	0.740168	-5.21999
Q9HBH0	RHOF	INM:SMES:AR02	-0.341207	13.0001	-0.918202	0.371236	0.740168	-5.22009
Q8WXF1	PSPC1	INM:SMES:AR02	-0.173635	13.4683	-0.918009	0.371334	0.740168	-5.22024
P62269	RPS18	INM:SMES:AR02	-0.173028	17.3505	-0.917649	0.371518	0.740168	-5.22053
P02788	LTF	INM:SMES:AR02	-0.201307	20.9997	-0.917121	0.371786	0.740168	-5.22095
Q01130	SRSF2	INM:SMES:AR02	-0.540608	13.9272	-0.915707	0.372507	0.740178	-5.22207
Q5TID7	CCDC181	INM:SMES:AR02	0.255939	14.952	0.91531	0.37271	0.740178	-5.22239
O43815	STRN	INM:SMES:AR02	0.200163	12.9814	0.914195	0.373278	0.740178	-5.22327
Q96CW5	TUBGCP3	INM:SMES:AR02	-0.266436	11.9716	-0.913779	0.373491	0.740178	-5.2236
Q12873	CHD3	INM:SMES:AR02	0.256282	14.7179	0.91322	0.373777	0.740178	-5.22404
Q96RR4	CAMKK2	INM:SMES:AR02	0.221889	12.9281	0.912686	0.37405	0.740178	-5.22447
Q13363	CTBP1	INM:SMES:AR02	-0.217736	13.1793	-0.912441	0.374175	0.740178	-5.22466
Q8NE71	ABCF1	INM:SMES:AR02	-0.238576	17.6715	-0.910583	0.375126	0.740848	-5.22613
Q99570	PIK3R4	INM:SMES:AR02	0.232079	12.033	0.909982	0.375434	0.740848	-5.2266
Q92609	TBC1D5	INM:SMES:AR02	0.183923	13.0954	0.909405	0.37573	0.740848	-5.22706
P15586	GNS	INM:SMES:AR02	-0.163982	14.8913	-0.908829	0.376025	0.740848	-5.22751
Q9UIJ7	AK3	INM:SMES:AR02	-0.355749	13.421	-0.908455	0.376217	0.740848	-5.22781
Q5GLZ8	HERC4	INM:SMES:AR02	-0.243817	12.1139	-0.906864	0.377034	0.741083	-5.22906
P06396	GSN	INM:SMES:AR02	0.277442	19.3311	0.905772	0.377596	0.741083	-5.22992
P17252	PRKCA	INM:SMES:AR02	0.228917	12.6366	0.904367	0.378319	0.741083	-5.23102
Q969Q5	RAB24	INM:SMES:AR02	0.348602	12.5153	0.903674	0.378677	0.741083	-5.23157
Q7Z7H5	TMED4	INM:SMES:AR02	-0.312495	13.4786	-0.90365	0.378689	0.741083	-5.23158
O43776	NARS1	INM:SMES:AR02	0.378787	11.7616	0.903601	0.378715	0.741083	-5.23162
Q9UPQ9	TNRC6B	INM:SMES:AR02	0.279822	10.4248	0.903585	0.378723	0.741083	-5.23164
Q9NR50	EIF2B3	INM:SMES:AR02	-0.326951	11.0978	-0.902038	0.379521	0.741977	-5.23285
P22061	PCMT1	INM:SMES:AR02	-0.3009	13.4761	-0.900509	0.380311	0.742853	-5.23404
P78536	ADAM17	INM:SMES:AR02	0.213587	11.8079	0.898518	0.381342	0.744198	-5.2356
Q7L2H7	EIF3M	INM:SMES:AR02	0.399657	11.4605	0.897154	0.382048	0.744909	-5.23666
Q8TBP0	TBC1D16	INM:SMES:AR02	-0.252781	13.3689	-0.895548	0.382882	0.745406	-5.23791
Q9UL46	PSME2	INM:SMES:AR02	0.181111	15.162	0.894988	0.383173	0.745406	-5.23835
P46779	RPL28	INM:SMES:AR02	-0.210493	13.8	-0.894681	0.383332	0.745406	-5.23859
Q9Y383	LUC7L2	INM:SMES:AR02	0.493906	10.1842	0.892264	0.38459	0.746563	-5.24047
Q96SY0	INTS14	INM:SMES:AR02	-0.271982	11.9864	-0.892218	0.384614	0.746563	-5.2405
Q15075	EEA1	INM:SMES:AR02	0.261593	13.0616	0.891113	0.38519	0.747014	-5.24136
Q99704	DOK1	INM:SMES:AR02	-0.209115	12.9909	-0.889268	0.386153	0.747402	-5.24278
O00231	PSMD11	INM:SMES:AR02	-0.286116	13.7825	-0.888458	0.386576	0.747402	-5.24341
Q9UPN9	TRIM33	INM:SMES:AR02	-0.224214	14.8138	-0.888309	0.386654	0.747402	-5.24353
Q53EU6	GPAT3	INM:SMES:AR02	-0.292347	12.6406	-0.888041	0.386794	0.747402	-5.24373
O43143	DHX15	INM:SMES:AR02	-0.531927	14.0649	-0.886418	0.387644	0.747402	-5.24499
Q8N4C6	NIN	INM:SMES:AR02	-0.467309	17.4956	-0.886251	0.387731	0.747402	-5.24511
P50851	LRBA	INM:SMES:AR02	0.317577	11.848	0.88407	0.388875	0.747402	-5.24679
P54289	CACNA2D1	INM:SMES:AR02	0.310046	11.1176	0.88394	0.388943	0.747402	-5.24689
Q63HN8	RNF213	INM:SMES:AR02	-0.135423	13.448	-0.883427	0.389212	0.747402	-5.24729
O60216	RAD21	INM:SMES:AR02	0.178894	14.7816	0.882862	0.389509	0.747402	-5.24772
Q7Z5L2	R3HCC1L	INM:SMES:AR02	0.337197	12.3209	0.882527	0.389685	0.747402	-5.24798
P08238	HSP90AB1	INM:SMES:AR02	0.177593	18.3799	0.882196	0.389859	0.747402	-5.24823
P23458	JAK1	INM:SMES:AR02	0.167786	14.7032	0.882195	0.389859	0.747402	-5.24823
P40937	RFC5	INM:SMES:AR02	-0.301624	11.4897	-0.881341	0.390308	0.747604	-5.24889
Q96Q05	TRAPPC9	INM:SMES:AR02	0.177862	12.4786	0.879683	0.391181	0.748192	-5.25016
P46776	RPL27A	INM:SMES:AR02	-0.468282	12.2855	-0.878774	0.39166	0.748192	-5.25085
Q01433	AMPD2	INM:SMES:AR02	0.236054	12.184	0.878331	0.391894	0.748192	-5.25119
Q6NXT6	TAPT1	INM:SMES:AR02	-0.262088	11.5986	-0.878144	0.391992	0.748192	-5.25134
O60636	TSPAN2	INM:SMES:AR02	-0.40087	15.2639	-0.874827	0.393745	0.749687	-5.25387
P48637	GSS	INM:SMES:AR02	-0.171092	12.5759	-0.874217	0.394068	0.749687	-5.25433
O00453	LST1	INM:SMES:AR02	0.165099	16.2136	0.872833	0.394801	0.749687	-5.25539
Q8NBS9	TXNDC5	INM:SMES:AR02	0.155484	13.793	0.872211	0.395131	0.749687	-5.25586
Q96IX5	ATP5MK	INM:SMES:AR02	-0.283546	12.9358	-0.871199	0.395668	0.749687	-5.25663
Q96DM3	RMC1	INM:SMES:AR02	0.195033	13.2289	0.871087	0.395727	0.749687	-5.25671
Q15436	SEC23A	INM:SMES:AR02	0.137967	15.7527	0.870192	0.396202	0.749687	-5.25739
O75533	SF3B1	INM:SMES:AR02	0.124455	15.5315	0.869424	0.396611	0.749687	-5.25797
Q9UBF8	PI4KB	INM:SMES:AR02	0.449978	9.80105	0.867847	0.39745	0.749687	-5.25917
P62280	RPS11	INM:SMES:AR02	-0.291543	13.6048	-0.867696	0.39753	0.749687	-5.25928
Q8IZX4	TAF1L	INM:SMES:AR02	-0.48159	18.8831	-0.86713	0.397832	0.749687	-5.25971
Q66K74	MAP1S	INM:SMES:AR02	0.153449	14.0993	0.866379	0.398232	0.749687	-5.26028
P49023	PXN	INM:SMES:AR02	0.220817	14.5429	0.866135	0.398362	0.749687	-5.26046
Q8NI08	NCOA7	INM:SMES:AR02	-0.236044	11.4509	-0.865327	0.398793	0.749687	-5.26107
P00491	PNP	INM:SMES:AR02	-0.214549	13.8817	-0.865173	0.398875	0.749687	-5.26119
P17844	DDX5	INM:SMES:AR02	0.212408	14.1579	0.86484	0.399053	0.749687	-5.26144
P37235	HPCAL1	INM:SMES:AR02	0.191144	12.2973	0.864531	0.399218	0.749687	-5.26167
Q6P1J9	CDC73	INM:SMES:AR02	0.404352	11.1421	0.864472	0.399249	0.749687	-5.26171
O15117	FYB1	INM:SMES:AR02	0.208187	13.2816	0.864325	0.399327	0.749687	-5.26182
Q7Z4H7	HAUS6	INM:SMES:AR02	-0.349851	12.6278	-0.862143	0.400494	0.750004	-5.26347
P62310	LSM3	INM:SMES:AR02	-0.247038	13.5456	-0.862099	0.400518	0.750004	-5.2635
P30876	POLR2B	INM:SMES:AR02	0.358558	11.621	0.861767	0.400695	0.750004	-5.26375
P33241	LSP1	INM:SMES:AR02	0.191499	15.1931	0.86143	0.400876	0.750004	-5.264
Q13137	CALCOCO2	INM:SMES:AR02	-0.210133	13.13	-0.860086	0.401596	0.750011	-5.26501
P13667	PDIA4	INM:SMES:AR02	-0.183807	13.9201	-0.860056	0.401612	0.750011	-5.26503
Q6P5R6	RPL22L1	INM:SMES:AR02	-0.218963	15.6158	-0.859491	0.401915	0.750011	-5.26546
Q8IYD1	GSPT2	INM:SMES:AR02	0.144617	12.3975	0.85878	0.402296	0.750079	-5.26599
O75146	HIP1R	INM:SMES:AR02	0.238797	14.3375	0.85774	0.402854	0.750226	-5.26677
Q00765	REEP5	INM:SMES:AR02	-0.183408	14.6369	-0.857348	0.403065	0.750226	-5.26706
P00492	HPRT1	INM:SMES:AR02	0.221567	15.8145	0.85496	0.404349	0.751972	-5.26885
Q8TEW0	PARD3	INM:SMES:AR02	0.441417	10.8981	0.853089	0.405358	0.753203	-5.27024
P83881	RPL36A	INM:SMES:AR02	0.280464	12.1676	0.849942	0.407057	0.755715	-5.27258
Q9Y5Z4	HEBP2	INM:SMES:AR02	0.183318	14.0306	0.848109	0.408049	0.756468	-5.27394
P42356	PI4KA	INM:SMES:AR02	-0.256018	11.7943	-0.847907	0.408159	0.756468	-5.27409
A0AVT1	UBA6	INM:SMES:AR02	0.280964	11.616	0.845955	0.409217	0.757783	-5.27553
Q9BPW8	NIPSNAP1	INM:SMES:AR02	-0.290107	12.924	-0.845204	0.409624	0.757892	-5.27609
P20700	LMNB1	INM:SMES:AR02	0.204552	16.5713	0.844274	0.41013	0.758182	-5.27678
[truncated: 998 more rows]
