# Supplementary material for: Schistosoma immune evasion of NETosis is reversed by aryl hydantoin Ro 13-3978
Source: Research Square preprint supplement (doi:10.21203/rs.3.rs-7453538/v1), 2025-08-26
Supplement: Supplementary file 3 [file b483f5a98eed3e15449d0ad6.xlsx]

## Sheet: AR02
accession	gene_symbol	coef	logFC	AveExpr	t	P.Value	adj.P.Val	B
Q9H7P6	MVB12B	AR02	-0.741802	10.6043	-5.05062	0.000124555	0.573017	-1.79112
Q3SXM5	HSDL1	AR02	0.920777	10.4929	4.69877	0.000252578	0.573017	-2.00313
A1L020	MEX3A	AR02	1.14276	13.4794	4.55939	0.000335421	0.573017	-2.0916
Q9Y6A4	CFAP20	AR02	0.555933	12.9537	4.44925	0.000420255	0.573017	-2.1633
P68871	HBB	AR02	0.992794	15.5281	4.03389	0.00099218	0.668722	-2.44774
Q71DI3	H3C14	AR02	-0.598557	20.5951	-3.9462	0.00119115	0.668722	-2.51054
Q96II8	LRCH3	AR02	-0.677054	10.1838	-3.82393	0.00153781	0.668722	-2.59962
Q03001	DST	AR02	0.308581	15.0117	3.80214	0.00160952	0.668722	-2.61567
P35251	RFC1	AR02	0.504865	11.3283	3.79351	0.00163884	0.668722	-2.62204
O43752	STX6	AR02	0.44886	11.8026	3.72133	0.00190618	0.668722	-2.67568
P06702	S100A9	AR02	-0.458855	19.9507	-3.69185	0.00202757	0.668722	-2.69775
Q96Q89	KIF20B	AR02	0.770487	12.1114	3.6322	0.00229752	0.668722	-2.74269
Q7L5Y1	ENOSF1	AR02	0.746987	11.0531	3.60803	0.00241685	0.668722	-2.761
O00487	PSMD14	AR02	0.302804	13.8835	3.56355	0.00265304	0.668722	-2.79486
Q9C0I4		AR02	0.987625	11.6145	3.55801	0.00268401	0.668722	-2.79909
Q9UQC2	GAB2	AR02	0.782996	11.2581	3.55245	0.00271549	0.668722	-2.80334
Q9NVI1	FANCI	AR02	0.646289	14.2954	3.52578	0.00287158	0.668722	-2.82376
Q9NWH9	SLTM	AR02	-0.518381	12.2491	-3.51343	0.00294693	0.668722	-2.83325
Q6IQ23	PLEKHA7	AR02	0.488946	12.6885	3.47543	0.00319119	0.668722	-2.8625
Q8NEY8	PPHLN1	AR02	-0.920178	12.2139	-3.46878	0.00323599	0.668722	-2.86764
Q86WG5	SBF2	AR02	0.997117	12.6239	3.43848	0.00344809	0.668722	-2.89109
Q6ZMK1	ZFTRAF1	AR02	0.308683	15.178	3.43662	0.00346156	0.668722	-2.89253
P39880	CUX1	AR02	0.289611	15.0266	3.41384	0.00363076	0.668722	-2.91022
P36406	TRIM23	AR02	0.357217	14.3881	3.40878	0.00366945	0.668722	-2.91415
I3L3R5	CCER2	AR02	-1.10519	12.039	-3.38823	0.00383083	0.668722	-2.93016
P49790	NUP153	AR02	-0.270259	14.0131	-3.34996	0.0041504	0.668722	-2.96005
Q15904	ATP6AP1	AR02	0.268615	14.9617	3.31082	0.00450469	0.668722	-2.99076
Q6UWV6	ENPP7	AR02	0.434859	13.4054	3.27472	0.00485784	0.668722	-3.01918
P68371	TUBB4B	AR02	-1.14711	15.6359	-3.25517	0.00506046	0.668722	-3.03462
O43294	TGFB1I1	AR02	0.464218	11.6654	3.25303	0.00508313	0.668722	-3.03631
Q9NVZ3	NECAP2	AR02	0.314282	14.0727	3.25241	0.0050898	0.668722	-3.0368
P84022	SMAD3	AR02	0.403043	13.8118	3.24845	0.00513204	0.668722	-3.03993
Q9BTE7	DCUN1D5	AR02	0.531203	10.5042	3.2399	0.00522458	0.668722	-3.0467
Q9NRP0	OSTC	AR02	0.262132	13.9555	3.23939	0.00523006	0.668722	-3.04709
Q9NWV8	BABAM1	AR02	0.350424	12.4943	3.22851	0.00535031	0.668722	-3.05571
Q8N6R0	METTL13	AR02	0.393126	10.6062	3.22805	0.0053555	0.668722	-3.05608
Q9Y3X0	CCDC9	AR02	-0.602751	12.5997	-3.22171	0.00542685	0.668722	-3.0611
Q9NQC3	RTN4	AR02	-0.437213	18.2761	-3.20662	0.00560049	0.668722	-3.07307
Q9Y5S8	NOX1	AR02	0.380032	16.013	3.18903	0.00580991	0.668722	-3.08704
Q9C0I1	MTMR12	AR02	-0.588276	10.0996	-3.18717	0.00583255	0.668722	-3.08852
Q9C0K0	BCL11B	AR02	-0.552002	11.7907	-3.17742	0.00595234	0.668722	-3.09627
Q5JSZ5	PRRC2B	AR02	-0.517995	12.6745	-3.17358	0.00600022	0.668722	-3.09933
Q96JP5	ZFP91	AR02	-1.32186	10.4397	-3.17126	0.00602932	0.668722	-3.10118
O94921	CDK14	AR02	0.814757	10.5365	3.16726	0.00607979	0.668722	-3.10436
Q9Y5R8	TRAPPC1	AR02	-0.306773	13.6421	-3.16628	0.00609225	0.668722	-3.10514
Q5VYY1	ANKRD22	AR02	0.263202	14.6082	3.16411	0.00611986	0.668722	-3.10687
Q86VP3	PACS2	AR02	0.962784	9.71818	3.1324	0.00653788	0.668722	-3.13216
Q07820	MCL1	AR02	-0.466418	12.1616	-3.12186	0.00668306	0.668722	-3.14058
Q96GE4	CEP95	AR02	0.488964	19.1903	3.12137	0.00668985	0.668722	-3.14097
Q9H061	TMEM126A	AR02	0.513982	12.5095	3.12102	0.0066947	0.668722	-3.14125
Q9HBH5	RDH14	AR02	0.557152	12.0389	3.1209	0.00669647	0.668722	-3.14135
P56282	POLE2	AR02	1.32799	10.9759	3.12076	0.00669837	0.668722	-3.14146
A2RUC4	TYW5	AR02	-0.440151	11.3948	-3.11364	0.00679834	0.668722	-3.14715
Q69YN4	VIRMA	AR02	0.425248	11.0868	3.09658	0.00704404	0.668722	-3.1608
Q9UK76	JPT1	AR02	-0.637619	13.1195	-3.08866	0.00716109	0.668722	-3.16714
Q5HYK3	COQ5	AR02	-0.950604	9.9639	-3.07442	0.00737628	0.668722	-3.17855
Q8N4P3	HDDC3	AR02	-0.413216	11.0474	-3.06972	0.00744867	0.668722	-3.18232
Q5VW32	BROX	AR02	-0.29655	14.8585	-3.04533	0.00783583	0.668722	-3.2019
Q9BY77	POLDIP3	AR02	-0.389212	11.929	-3.03789	0.00795785	0.668722	-3.20788
P54840	GYS2	AR02	0.307742	15.7114	3.03327	0.00803448	0.668722	-3.21159
Q9H0V9	LMAN2L	AR02	-0.242066	14.5048	-3.01919	0.00827267	0.668722	-3.22292
Q96RU2	USP28	AR02	0.942054	12.2796	3.01705	0.00830953	0.668722	-3.22464
Q99729	HNRNPAB	AR02	0.29545	14.804	3.01592	0.00832901	0.668722	-3.22555
A6NMX2	EIF4E1B	AR02	0.543676	11.3955	3.01463	0.00835128	0.668722	-3.22659
P49641	MAN2A2	AR02	0.33134	13.6113	3.01241	0.00838979	0.668722	-3.22837
Q969F9	HPS3	AR02	0.432002	13.0302	2.99314	0.00873181	0.668722	-3.2439
Q5JRA6	MIA3	AR02	-0.300728	14.5564	-2.9924	0.00874513	0.668722	-3.24449
Q15413	RYR3	AR02	0.545601	12.1367	2.97982	0.00897606	0.668722	-3.25463
O00194	RAB27B	AR02	0.377151	14.5104	2.96476	0.00926035	0.668722	-3.26678
Q8N488	RYBP	AR02	-0.747676	10.1457	-2.95558	0.00943794	0.668722	-3.27419
Q6YHU6	THADA	AR02	0.664643	13.3504	2.94512	0.00964427	0.668722	-3.28264
Q9Y6W5	WASF2	AR02	-0.695385	14.5186	-2.93664	0.00981476	0.668722	-3.28949
Q9Y5Y2	NUBP2	AR02	0.788894	12.2989	2.93443	0.00985974	0.668722	-3.29128
P62888	RPL30	AR02	-0.266717	15.6569	-2.93076	0.0099348	0.668722	-3.29424
Q9GZR7	DDX24	AR02	-0.563093	11.7868	-2.93014	0.00994753	0.668722	-3.29474
Q5TFQ8	SIRPB1	AR02	-0.741793	10.0686	-2.9241	0.0100723	0.668722	-3.29962
Q9H871	RMND5A	AR02	0.454566	10.9635	2.92093	0.0101385	0.668722	-3.30219
Q5T1J5		AR02	-0.666116	12.2977	-2.91498	0.0102639	0.668722	-3.307
P28676	GCA	AR02	0.309744	20.4403	2.90963	0.0103778	0.668722	-3.31133
Q9UKF7	PITPNC1	AR02	0.583131	11.9114	2.8984	0.010621	0.668722	-3.32041
P02786	TFRC	AR02	1.04103	10.6544	2.89361	0.0107264	0.668722	-3.32429
Q6JBY9	RCSD1	AR02	-0.471188	14.776	-2.89349	0.0107291	0.668722	-3.32439
Q4G0J3	LARP7	AR02	-0.321362	13.2684	-2.87412	0.0111661	0.668722	-3.34008
Q9NXC5	MIOS	AR02	0.324154	11.4999	2.86941	0.011275	0.668722	-3.3439
Q92630	DYRK2	AR02	0.781188	15.3697	2.86478	0.0113829	0.668722	-3.34764
P55036	PSMD4	AR02	-0.35674	13.8221	-2.85647	0.0115793	0.668722	-3.35438
Q92478	CLEC2B	AR02	-0.597192	12.4125	-2.84747	0.0117956	0.668722	-3.36167
P42167	TMPO	AR02	-0.368037	16.9706	-2.84194	0.0119305	0.668722	-3.36616
O94889	KLHL18	AR02	0.346493	11.3591	2.83641	0.012067	0.668722	-3.37064
Q8NFH8	REPS2	AR02	-0.592528	11.7846	-2.83635	0.0120685	0.668722	-3.37069
P11908	PRPS2	AR02	0.266441	13.8098	2.8344	0.0121168	0.668722	-3.37227
Q99459	CDC5L	AR02	-0.271254	14.1471	-2.82656	0.0123138	0.668722	-3.37864
Q8IY17	PNPLA6	AR02	0.265092	12.7278	2.82237	0.0124201	0.668722	-3.38203
Q9HBL8	NMRAL1	AR02	-0.590262	11.3247	-2.82208	0.0124275	0.668722	-3.38227
O75131	CPNE3	AR02	0.191275	17.795	2.8177	0.0125397	0.668722	-3.38582
Q86W56	BPHL	AR02	0.332889	11.5532	2.80724	0.0128119	0.668722	-3.39431
P51553	IDH3G	AR02	0.453564	12.8167	2.80293	0.0129255	0.668722	-3.39781
P02686	MBP	AR02	-0.483653	12.7035	-2.79882	0.0130351	0.668722	-3.40115
Q9NZM1	MYOF	AR02	0.526982	11.9464	2.79728	0.0130763	0.668722	-3.4024
Q92918	MAP4K1	AR02	0.65631	10.4556	2.79508	0.0131354	0.668722	-3.40418
Q6PJT7	ZC3H14	AR02	-0.279615	12.3738	-2.79144	0.0132338	0.668722	-3.40714
Q13425	SNTB2	AR02	0.363466	13.4898	2.79029	0.0132651	0.668722	-3.40807
Q92729	PTPRU	AR02	0.555044	15.2942	2.78572	0.0133897	0.668722	-3.41178
Q9Y6A5	TACC3	AR02	-0.340425	12.3705	-2.78138	0.0135094	0.668722	-3.41531
P63279	UBE2I	AR02	-0.192753	17.4097	-2.77844	0.0135909	0.668722	-3.41769
Q96G97	BSCL2	AR02	0.64755	11.5696	2.77524	0.0136804	0.668722	-3.4203
Q96ME7	ZNF512	AR02	-0.439025	12.3697	-2.7691	0.0138534	0.668722	-3.42528
Q9Y4H4	GPSM3	AR02	-0.363825	16.0044	-2.76783	0.0138894	0.668722	-3.42631
Q9UJW0	DCTN4	AR02	-0.271308	13.4975	-2.7613	0.0140762	0.668722	-3.43162
Q5T013	HYI	AR02	-0.428914	11.8168	-2.76084	0.0140895	0.668722	-3.43199
Q86WN1	FCHSD1	AR02	-0.608589	11.1097	-2.76013	0.0141099	0.668722	-3.43257
Q9UHR5	SAP30BP	AR02	-0.606786	11.7598	-2.75746	0.0141873	0.668722	-3.43474
O60784	TOM1	AR02	-0.295966	15.0318	-2.75534	0.0142489	0.668722	-3.43646
Q99627	COPS8	AR02	-0.409287	13.8243	-2.74718	0.0144883	0.668722	-3.44308
O15533	TAPBP	AR02	0.258035	14.3436	2.74582	0.0145288	0.668722	-3.44419
Q96PV6	LENG8	AR02	-0.523693	10.5531	-2.74348	0.0145985	0.668722	-3.4461
Q14696	MESD	AR02	-0.369395	12.6572	-2.74299	0.0146131	0.668722	-3.44649
O15127	SCAMP2	AR02	-0.766387	13.4205	-2.74161	0.0146542	0.668722	-3.44761
Q687X5	STEAP4	AR02	-0.427989	13.6974	-2.74118	0.0146671	0.668722	-3.44796
P02100	HBE1	AR02	0.597568	12.2428	2.73964	0.0147134	0.668722	-3.44921
Q13163	MAP2K5	AR02	-0.787831	9.50911	-2.70889	0.015666	0.706136	-3.4742
P55061	TMBIM6	AR02	0.349938	13.7986	2.70322	0.015848	0.706704	-3.47881
P63218	GNG5	AR02	-0.615806	11.6289	-2.69923	0.0159772	0.706704	-3.48205
Q5FWF7	FBXO48	AR02	0.717672	12.0277	2.69347	0.0161659	0.706704	-3.48674
O00629	KPNA4	AR02	0.438007	12.7891	2.69253	0.0161969	0.706704	-3.4875
Q8N5W9	RFLNB	AR02	-0.601971	14.3585	-2.68103	0.0165802	0.711517	-3.49684
Q96GX5	MASTL	AR02	0.553219	14.5991	2.67729	0.0167069	0.711517	-3.49989
Q6ZUJ8	PIK3AP1	AR02	-0.31076	12.8919	-2.67396	0.0168202	0.711517	-3.50259
Q9BY43	CHMP4A	AR02	-0.340076	12.2357	-2.6688	0.0169976	0.711517	-3.50678
P19174	PLCG1	AR02	-0.788043	13.1804	-2.66848	0.0170086	0.711517	-3.50704
Q14114	LRP8	AR02	0.607352	15.593	2.66613	0.01709	0.711517	-3.50895
Q8TEW8	PARD3B	AR02	0.482771	12.0208	2.65966	0.0173159	0.713175	-3.51421
P62195	PSMC5	AR02	0.182435	14.1443	2.65752	0.0173913	0.713175	-3.51595
O00453	LST1	AR02	-0.402118	15.7964	-2.64732	0.0177552	0.722662	-3.52424
Q92611	EDEM1	AR02	0.582909	10.853	2.63707	0.0181279	0.732369	-3.53257
P82979	SARNP	AR02	-0.481099	15.2988	-2.63217	0.0183088	0.734237	-3.53655
Q96MX0	CMTM3	AR02	0.498833	11.9025	2.62304	0.0186505	0.741156	-3.54397
Q9BXJ8	TMEM120A	AR02	0.411658	13.2864	2.61799	0.0188423	0.741156	-3.54807
Q8NHM5	KDM2B	AR02	-0.398364	13.6161	-2.61676	0.018889	0.741156	-3.54907
Q15056	EIF4H	AR02	-0.905936	12.975	-2.6098	0.0191567	0.746292	-3.55472
Q15022	SUZ12	AR02	0.334809	11.8151	2.59877	0.0195888	0.748837	-3.56368
P62745	RHOB	AR02	0.533333	13.0384	2.59235	0.0198445	0.748837	-3.56889
Q15126	PMVK	AR02	0.317151	12.7331	2.5921	0.0198545	0.748837	-3.5691
P00480	OTC	AR02	1.04857	12.3565	2.59027	0.0199279	0.748837	-3.57058
P05091	ALDH2	AR02	0.191245	15.3614	2.58349	0.0202025	0.748837	-3.57608
Q9Y3L5	RAP2C	AR02	0.303926	15.6595	2.58179	0.0202718	0.748837	-3.57746
P0C2W1	FBXO45	AR02	0.242699	12.6302	2.57686	0.0204741	0.748837	-3.58146
Q5HYW2		AR02	-0.379476	13.4543	-2.57613	0.0205046	0.748837	-3.58206
Q9H0U4	RAB1B	AR02	0.339666	15.6288	2.57044	0.020741	0.748837	-3.58667
Q9BQE5	APOL2	AR02	-0.662356	9.5651	-2.56993	0.0207622	0.748837	-3.58709
Q9P270	SLAIN2	AR02	-0.344364	12.3118	-2.56914	0.0207955	0.748837	-3.58773
Q9UQ35	SRRM2	AR02	-0.252757	13.3509	-2.56607	0.0209245	0.748837	-3.59022
P48382	RFX5	AR02	-0.769167	10.8806	-2.56198	0.0210975	0.748837	-3.59354
Q13439	GOLGA4	AR02	0.349639	12.8433	2.56038	0.0211654	0.748837	-3.59484
Q9NP77	SSU72	AR02	-0.495709	11.2093	-2.55418	0.021431	0.748837	-3.59986
P22059	OSBP	AR02	-0.28403	13.771	-2.55135	0.0215535	0.748837	-3.60216
Q15118	PDK1	AR02	0.266366	12.7627	2.55129	0.0215562	0.748837	-3.60221
Q86YT6	MIB1	AR02	0.445055	11.3662	2.54793	0.0217025	0.749147	-3.60494
P19838	NFKB1	AR02	0.20019	14.3874	2.53806	0.022137	0.759342	-3.61293
Q3KQU3	MAP7D1	AR02	-0.372503	14.3069	-2.53258	0.0223823	0.762957	-3.61738
Q02241	KIF23	AR02	0.463128	15.6709	2.52868	0.0225581	0.764173	-3.62054
Q9UBU8	MORF4L1	AR02	0.443533	12.184	2.52425	0.0227597	0.766058	-3.62413
Q9GZY6	LAT2	AR02	-0.465725	12.8121	-2.51657	0.0231128	0.766058	-3.63035
Q8N4C6	NIN	AR02	-0.182635	15.3338	-2.51494	0.0231887	0.766058	-3.63168
Q8N4C8	MINK1	AR02	0.348666	13.011	2.51069	0.0233868	0.766058	-3.63511
Q9Y276	BCS1L	AR02	-0.216769	15.8245	-2.5021	0.0237929	0.766058	-3.64207
Q7RTR2	NLRC3	AR02	0.506871	14.1558	2.49645	0.0240634	0.766058	-3.64665
Q9Y5K6	CD2AP	AR02	-0.283028	13.8902	-2.49397	0.0241828	0.766058	-3.64865
Q9Y5L4	TIMM13	AR02	0.190101	14.1561	2.49251	0.0242537	0.766058	-3.64983
Q9Y383	LUC7L2	AR02	-0.202043	14.7152	-2.49064	0.0243444	0.766058	-3.65134
Q14511	NEDD9	AR02	-0.24263	13.4885	-2.48841	0.0244533	0.766058	-3.65315
Q08257	CRYZ	AR02	0.234176	12.8001	2.4837	0.0246846	0.766058	-3.65696
Q6RW13	AGTRAP	AR02	-0.383946	15.1881	-2.48304	0.0247173	0.766058	-3.6575
P49770	EIF2B2	AR02	0.558214	11.6886	2.47745	0.0249949	0.766058	-3.66202
Q9NY65	TUBA8	AR02	0.39571	17.2809	2.47606	0.0250642	0.766058	-3.66314
Q9GZS3	SKIC8	AR02	0.36654	13.7122	2.47416	0.0251596	0.766058	-3.66468
Q5BKZ1	ZNF326	AR02	-0.412737	10.5016	-2.46776	0.0254832	0.766058	-3.66986
Q96L93	KIF16B	AR02	-0.352579	12.4511	-2.46683	0.0255306	0.766058	-3.67061
P29084	GTF2E2	AR02	-0.610533	9.89741	-2.46623	0.0255612	0.766058	-3.67109
O00268	TAF4	AR02	-0.334667	12.1654	-2.46074	0.0258424	0.766058	-3.67553
Q15031	LARS2	AR02	0.442785	11.0034	2.46	0.0258805	0.766058	-3.67613
P51608	MECP2	AR02	-0.406211	12.7093	-2.45928	0.0259175	0.766058	-3.67671
Q53HV7	SMUG1	AR02	-0.743532	9.72212	-2.45828	0.0259696	0.766058	-3.67752
Q7Z739	YTHDF3	AR02	-0.359945	12.9093	-2.45785	0.0259918	0.766058	-3.67786
Q7Z2E3	APTX	AR02	0.423348	11.1579	2.45665	0.0260541	0.766058	-3.67884
O60488	ACSL4	AR02	-0.208295	13.9457	-2.45352	0.0262167	0.766058	-3.68136
Q6UW68	TMEM205	AR02	-0.283623	14.1198	-2.45259	0.0262656	0.766058	-3.68211
Q96CM8	ACSF2	AR02	0.268289	11.5041	2.4413	0.0268626	0.772188	-3.69123
P56378	ATP5MJ	AR02	0.532773	12.7706	2.44009	0.0269271	0.772188	-3.6922
O75396	SEC22B	AR02	-0.347682	14.203	-2.43639	0.0271263	0.772188	-3.69519
O95295	SNAPIN	AR02	-0.336209	14.076	-2.42984	0.0274818	0.772188	-3.70048
P52565	ARHGDIA	AR02	-0.256456	18.857	-2.42748	0.0276109	0.772188	-3.70238
Q9BSL1	UBAC1	AR02	0.420928	14.0769	2.42331	0.0278407	0.772188	-3.70575
Q96BS2	TESC	AR02	-0.429565	12.1066	-2.42287	0.027865	0.772188	-3.7061
Q86VM9	ZC3H18	AR02	-0.438444	12.2027	-2.41653	0.0282179	0.772188	-3.71121
O60831	PRAF2	AR02	-0.258499	13.324	-2.41464	0.0283236	0.772188	-3.71273
Q99490	AGAP2	AR02	-0.247845	13.6763	-2.41251	0.0284436	0.772188	-3.71445
Q9NP73	ALG13	AR02	0.47246	14.5165	2.41157	0.0284969	0.772188	-3.71521
P13798	APEH	AR02	0.17768	15.7176	2.41122	0.0285164	0.772188	-3.71549
Q13557	CAMK2D	AR02	-0.293136	15.1717	-2.40886	0.0286501	0.772188	-3.71739
O60828	PQBP1	AR02	-0.237258	15.6076	-2.39963	0.0291794	0.772188	-3.72483
Q86Y37	CACUL1	AR02	0.40196	10.8654	2.3965	0.0293605	0.772188	-3.72735
Q969S3	ZNF622	AR02	-0.589355	10.235	-2.3912	0.02967	0.772188	-3.73161
Q06546	GABPA	AR02	0.370005	12.5729	2.3899	0.0297465	0.772188	-3.73266
P14317	HCLS1	AR02	-0.363928	16.8281	-2.38673	0.0299334	0.772188	-3.73521
Q5SW79	CEP170	AR02	-0.310652	13.1262	-2.38548	0.0300078	0.772188	-3.73621
P32519	ELF1	AR02	-0.355312	11.9921	-2.38378	0.0301088	0.772188	-3.73758
Q8N128	FAM177A1	AR02	-0.344119	11.2296	-2.3824	0.030191	0.772188	-3.73869
Q6P4R8	NFRKB	AR02	0.403935	10.5403	2.37968	0.0303538	0.772188	-3.74088
Q7Z2Z1	TICRR	AR02	0.525856	13.7471	2.37949	0.0303649	0.772188	-3.74103
Q9NZN8	CNOT2	AR02	-0.481991	11.1774	-2.37696	0.0305172	0.772188	-3.74307
P43034	PAFAH1B1	AR02	-0.212037	15.1744	-2.37645	0.0305479	0.772188	-3.74347
P19484	TFEB	AR02	-0.801932	10.4728	-2.36292	0.031375	0.772188	-3.75435
Q92506	HSD17B8	AR02	-0.273862	12.6493	-2.36277	0.0313839	0.772188	-3.75447
Q9NRL2	BAZ1A	AR02	-0.296214	13.772	-2.36271	0.0313875	0.772188	-3.75451
Q6Y288	B3GLCT	AR02	0.551054	10.2146	2.36161	0.0314561	0.772188	-3.7554
P55327	TPD52	AR02	-0.263277	13.2437	-2.36092	0.0314991	0.772188	-3.75596
Q96S97	MYADM	AR02	-0.474078	18.826	-2.35139	0.032096	0.772188	-3.7636
P52739	ZNF131	AR02	0.678037	14.1758	2.35058	0.0321473	0.772188	-3.76425
Q9H0A8	COMMD4	AR02	0.441502	13.7059	2.349	0.0322475	0.772188	-3.76552
Q92925	SMARCD2	AR02	-0.273842	12.8275	-2.34494	0.0325058	0.772188	-3.76877
Q96A49	SYAP1	AR02	-0.471393	10.6815	-2.34421	0.0325527	0.772188	-3.76936
Q5SWH9	TMEM69	AR02	0.827367	10.5907	2.33671	0.0330366	0.772188	-3.77538
Q6Y7W6	GIGYF2	AR02	-0.280081	12.265	-2.33488	0.0331558	0.772188	-3.77684
P49757	NUMB	AR02	-0.254254	14.4806	-2.33371	0.0332321	0.772188	-3.77778
Q9NZG7	NINJ2	AR02	-0.60481	10.5906	-2.33365	0.033236	0.772188	-3.77783
Q8NCA5	FAM98A	AR02	-1.04779	13.0238	-2.32969	0.0334958	0.772188	-3.781
P62253	UBE2G1	AR02	0.513225	12.3163	2.32838	0.0335816	0.772188	-3.78205
O14561	NDUFAB1	AR02	-0.531171	12.3744	-2.32368	0.033893	0.772188	-3.78581
Q5VZM2	RRAGB	AR02	0.175289	14.1808	2.32324	0.0339226	0.772188	-3.78617
Q5TEU4	NDUFAF5	AR02	-0.68474	12.0144	-2.32267	0.0339604	0.772188	-3.78662
P22033	MMUT	AR02	0.35726	12.6346	2.32259	0.0339656	0.772188	-3.78668
O43914	TYROBP	AR02	-0.876444	10.3065	-2.3224	0.0339786	0.772188	-3.78684
Q6UN15	FIP1L1	AR02	-0.34434	13.1445	-2.3219	0.0340119	0.772188	-3.78724
Q86XX4	FRAS1	AR02	0.785679	12.4495	2.32138	0.0340468	0.772188	-3.78766
Q13362	PPP2R5C	AR02	0.229253	12.9666	2.32123	0.0340565	0.772188	-3.78777
Q13107	USP4	AR02	-0.22471	14.6071	-2.31982	0.0341511	0.772188	-3.78891
Q14004	CDK13	AR02	-0.486146	12.1791	-2.31966	0.0341613	0.772188	-3.78903
Q8IYQ7	THNSL1	AR02	0.7056	11.2855	2.31833	0.034251	0.772188	-3.7901
P49459	UBE2A	AR02	0.331092	12.5099	2.31592	0.0344135	0.772188	-3.79203
Q9Y5U9	IER3IP1	AR02	0.416812	15.803	2.3147	0.0344955	0.772188	-3.793
P04920	SLC4A2	AR02	-0.252627	12.7331	-2.31436	0.0345185	0.772188	-3.79327
Q92562	FIG4	AR02	0.550985	10.9605	2.31435	0.0345195	0.772188	-3.79328
Q8TEU7	RAPGEF6	AR02	-0.317936	11.993	-2.31368	0.0345646	0.772188	-3.79381
O43290	SART1	AR02	-0.307873	12.6518	-2.31089	0.0347542	0.772188	-3.79605
Q9UKZ1	CNOT11	AR02	0.350988	11.7622	2.30804	0.034949	0.772188	-3.79833
Q06330	RBPJ	AR02	0.226328	12.9635	2.30772	0.0349707	0.772188	-3.79858
O43768	ENSA	AR02	-0.43038	14.8513	-2.29547	0.0358195	0.779741	-3.80837
Q92625	ANKS1A	AR02	-0.37449	11.2079	-2.29499	0.0358534	0.779741	-3.80876
O43815	STRN	AR02	-0.190871	16.2078	-2.29428	0.0359031	0.779741	-3.80932
Q8N6G5	CSGALNACT2	AR02	0.240541	13.9974	2.29297	0.0359952	0.779741	-3.81037
Q9NRH3	TUBG2	AR02	0.771011	13.5001	2.28988	0.0362133	0.779741	-3.81283
Q9NP58	ABCB6	AR02	0.412776	14.6352	2.28964	0.0362301	0.779741	-3.81302
Q9BQA9	CYBC1	AR02	-0.385444	13.0837	-2.2884	0.0363177	0.779741	-3.81401
O14974	PPP1R12A	AR02	-0.270328	15.6638	-2.28447	0.036598	0.779741	-3.81715
C9JRZ8	AKR1B15	AR02	0.738546	11.8104	2.28279	0.0367182	0.779741	-3.81849
O75152	ZC3H11A	AR02	-0.28449	12.5094	-2.27969	0.0369409	0.779741	-3.82096
Q92851	CASP10	AR02	0.199526	14.3479	2.27706	0.037131	0.779741	-3.82305
Q05209	PTPN12	AR02	-0.266121	14.1975	-2.27646	0.037175	0.779741	-3.82354
Q96KA5	CLPTM1L	AR02	-0.378175	11.1668	-2.27279	0.0374418	0.779741	-3.82646
P17676	CEBPB	AR02	-0.413279	12.3838	-2.26934	0.0376942	0.779741	-3.82921
Q9BWD1	ACAT2	AR02	0.203116	15.4254	2.26556	0.0379736	0.779741	-3.83222
Q9BW83	IFT27	AR02	0.223983	12.8547	2.2652	0.0380002	0.779741	-3.83251
P55209	NAP1L1	AR02	-0.370731	14.3087	-2.26494	0.0380188	0.779741	-3.83271
Q9Y4F1	FARP1	AR02	0.293224	13.1053	2.26222	0.038221	0.779741	-3.83488
Q9BVK2	ALG8	AR02	-0.594809	12.3076	-2.25925	0.0384427	0.779741	-3.83724
Q5CZC0	FSIP2	AR02	-0.634688	11.5953	-2.25921	0.0384456	0.779741	-3.83727
Q13200	PSMD2	AR02	0.158415	15.0312	2.25339	0.0388838	0.779741	-3.8419
O95741	CPNE6	AR02	0.174768	17.9213	2.25198	0.0389907	0.779741	-3.84303
Q15907	RAB11B	AR02	0.329309	18.0232	2.25127	0.0390442	0.779741	-3.84359
P56537	EIF6	AR02	-0.268946	15.8788	-2.24991	0.0391475	0.779741	-3.84467
Q9NVV5	AIG1	AR02	-0.616539	10.2253	-2.2473	0.0393467	0.779741	-3.84674
Q14765	STAT4	AR02	0.394035	9.91227	2.24664	0.0393977	0.779741	-3.84727
Q8TEP8	CEP192	AR02	0.293893	18.4416	2.24603	0.0394445	0.779741	-3.84776
Q9H410	DSN1	AR02	-0.318964	11.6078	-2.2441	0.0395924	0.779741	-3.84929
P07205	PGK2	AR02	0.654417	12.9451	2.24221	0.0397379	0.779741	-3.85079
Q9Y508	RNF114	AR02	-0.409829	11.3755	-2.23941	0.0399546	0.779741	-3.85301
Q9UPQ0	LIMCH1	AR02	0.370006	12.5982	2.23406	0.0403715	0.779741	-3.85726
Q9BQE3	TUBA1C	AR02	-0.569241	12.3205	-2.23406	0.0403715	0.779741	-3.85726
Q13496	MTM1	AR02	0.228678	12.4188	2.23276	0.0404735	0.779741	-3.85829
Q9NUU7	DDX19A	AR02	0.208766	14.0617	2.23218	0.0405191	0.779741	-3.85875
Q8NBM8	PCYOX1L	AR02	0.350849	12.6517	2.23094	0.0406165	0.779741	-3.85973
Q8WVM7	STAG1	AR02	0.252555	13.4053	2.23013	0.0406803	0.779741	-3.86037
P19878	NCF2	AR02	-0.305328	18.5844	-2.22718	0.0409136	0.779741	-3.86271
Q9Y3C8	UFC1	AR02	-0.204038	15.3514	-2.22679	0.0409445	0.779741	-3.86302
Q7L1W4	LRRC8D	AR02	-0.444551	10.3172	-2.22474	0.0411079	0.779741	-3.86465
O14523	C2CD2L	AR02	0.355966	11.7681	2.22445	0.0411311	0.779741	-3.86488
Q96JY6	PDLIM2	AR02	-0.336609	13.3832	-2.21927	0.0415459	0.779741	-3.86899
P09496	CLTA	AR02	0.21837	14.4046	2.21776	0.0416677	0.779741	-3.87018
Q4FZB7	KMT5B	AR02	0.722944	13.1374	2.21549	0.0418508	0.779741	-3.87198
Q6PCB5	RSBN1L	AR02	-0.46676	14.4876	-2.21364	0.0420006	0.779741	-3.87344
Q96AG4	LRRC59	AR02	0.401986	14.6896	2.21322	0.0420347	0.779741	-3.87377
Q68D10	SPTY2D1	AR02	-0.309818	11.3942	-2.21283	0.042067	0.779741	-3.87409
Q9H7N4	SCAF1	AR02	-0.466502	9.25051	-2.21169	0.0421593	0.779741	-3.87498
Q8TF68	ZNF384	AR02	-0.400465	11.973	-2.21	0.0422974	0.779741	-3.87632
Q9BQA1	WDR77	AR02	0.199092	13.5541	2.20698	0.0425454	0.779741	-3.87871
Q8TE02	ELP5	AR02	0.294262	11.7664	2.19789	0.0432994	0.779741	-3.8859
Q9H845	ACAD9	AR02	0.20852	12.7883	2.19687	0.0433843	0.779741	-3.88671
P57764	GSDMD	AR02	-0.347974	14.933	-2.19663	0.0434044	0.779741	-3.8869
Q10713	PMPCA	AR02	-0.241111	12.4105	-2.19565	0.0434868	0.779741	-3.88767
Q14573	ITPR3	AR02	0.182237	15.8699	2.19502	0.0435396	0.779741	-3.88817
P40926	MDH2	AR02	0.13135	16.7263	2.19247	0.0437546	0.779741	-3.89018
P61960	UFM1	AR02	-0.410359	15.5494	-2.19181	0.0438098	0.779741	-3.8907
Q7Z4W1	DCXR	AR02	0.175737	14.9452	2.19143	0.0438421	0.779741	-3.891
Q4VC44	FLYWCH1	AR02	0.500163	13.8329	2.19118	0.0438629	0.779741	-3.8912
Q9H853		AR02	-0.274932	17.6776	-2.18981	0.0439791	0.779741	-3.89228
Q8IVV7	GID4	AR02	-0.530969	10.6855	-2.18927	0.0440252	0.779741	-3.89271
P63165	SUMO1	AR02	0.397565	14.8455	2.18917	0.0440338	0.779741	-3.89279
Q6YBV0	SLC36A4	AR02	0.555065	9.74215	2.18158	0.0446827	0.785599	-3.89878
Q9UH62	ARMCX3	AR02	0.320119	11.0675	2.18147	0.0446915	0.785599	-3.89886
Q15349	RPS6KA2	AR02	-0.29055	14.402	-2.1802	0.0448012	0.785599	-3.89986
Q9Y394	DHRS7	AR02	0.173442	16.395	2.17859	0.0449408	0.785599	-3.90114
Q06323	PSME1	AR02	0.14082	18.0298	2.1702	0.0456718	0.795251	-3.90774
Q12981	BNIP1	AR02	-0.388536	13.0516	-2.16834	0.045835	0.795251	-3.90921
Q9UBI9	HECA	AR02	0.344	10.709	2.16611	0.0460319	0.795251	-3.91096
P46976	GYG1	AR02	0.191225	18.2783	2.1644	0.0461837	0.795251	-3.91231
Q9NWW5	CLN6	AR02	-0.340984	13.093	-2.16397	0.046222	0.795251	-3.91265
P20810	CAST	AR02	-0.380284	14.7466	-2.1619	0.0464057	0.795765	-3.91427
Q14126	DSG2	AR02	0.253497	14.1283	2.16036	0.0465436	0.795765	-3.91549
Q9P2S5	WRAP73	AR02	0.531694	9.91891	2.15753	0.0467972	0.79652	-3.91771
Q8NBF6	AVL9	AR02	0.223301	12.7977	2.1554	0.0469882	0.79652	-3.91938
Q9HBI1	PARVB	AR02	0.368171	14.0253	2.15486	0.047037	0.79652	-3.91981
Q8IUR0	TRAPPC5	AR02	0.297057	12.9482	2.1523	0.0472691	0.79652	-3.92182
Q9NQT5	EXOSC3	AR02	-0.265703	11.6156	-2.15176	0.047318	0.79652	-3.92225
Q13573	SNW1	AR02	-0.221747	13.2986	-2.14752	0.0477038	0.797578	-3.92558
O15144	ARPC2	AR02	0.163122	18.3032	2.14701	0.0477504	0.797578	-3.92598
Q8N573	OXR1	AR02	-0.249613	12.8245	-2.14626	0.0478196	0.797578	-3.92657
Q7Z5L2	R3HCC1L	AR02	0.433408	12.3001	2.1436	0.0480635	0.799203	-3.92865
Q6AI08	HEATR6	AR02	0.484443	14.606	2.13408	0.0489471	0.799341	-3.93612
Q9UL54	TAOK2	AR02	-0.275307	12.3799	-2.13318	0.0490313	0.799341	-3.93682
Q9ULZ3	PYCARD	AR02	-0.285033	18.602	-2.13188	0.0491533	0.799341	-3.93784
O60341	KDM1A	AR02	-0.160346	14.5288	-2.13101	0.0492349	0.799341	-3.93852
P10523	SAG	AR02	0.400937	11.6537	2.13054	0.0492797	0.799341	-3.93889
O95168	NDUFB4	AR02	-0.235821	13.7653	-2.12843	0.0494786	0.799341	-3.94054
P53814	SMTN	AR02	-0.480004	10.3008	-2.12843	0.0494786	0.799341	-3.94054
Q9NSY1	BMP2K	AR02	-0.24328	11.695	-2.12791	0.0495282	0.799341	-3.94095
Q9NVR2	INTS10	AR02	0.206673	11.9166	2.12445	0.049856	0.799341	-3.94366
P55212	CASP6	AR02	0.160931	13.1791	2.12227	0.0500644	0.799341	-3.94537
Q9BRX8	PRXL2A	AR02	0.315356	11.0918	2.12218	0.0500724	0.799341	-3.94543
Q9BUV8	RAB5IF	AR02	-0.604627	13.0322	-2.11945	0.0503344	0.799341	-3.94757
P60484	PTEN	AR02	0.346875	12.9324	2.11906	0.050372	0.799341	-3.94788
Q9Y4E6	WDR7	AR02	-0.226057	12.223	-2.11624	0.0506432	0.799341	-3.95008
P17612	PRKACA	AR02	0.233969	15.345	2.11511	0.0507527	0.799341	-3.95096
Q8IYB7	DIS3L2	AR02	0.257809	11.3409	2.11459	0.050803	0.799341	-3.95137
P63172	DYNLT1	AR02	-0.843905	11.4665	-2.11423	0.0508378	0.799341	-3.95165
P27707	DCK	AR02	0.182427	13.2592	2.11315	0.0509428	0.799341	-3.95249
Q12972	PPP1R8	AR02	-0.27632	11.6458	-2.11246	0.0510101	0.799341	-3.95303
Q3T8J9	GON4L	AR02	-0.697913	10.0069	-2.1118	0.0510745	0.799341	-3.95355
Q13946	PDE7A	AR02	0.428186	11.5868	2.10746	0.0514977	0.799341	-3.95693
Q99576	TSC22D3	AR02	-0.330716	12.3595	-2.10678	0.0515653	0.799341	-3.95747
P11049	CD37	AR02	-0.652142	13.3738	-2.1057	0.0516707	0.799341	-3.95831
Q9H2G2	SLK	AR02	-0.182017	16.1202	-2.10556	0.0516849	0.799341	-3.95842
Q6ZQN7	SLCO4C1	AR02	-0.562289	12.2801	-2.10372	0.0518662	0.799341	-3.95986
Q9NTN3	SLC35D1	AR02	0.30261	11.6817	2.10054	0.0521813	0.799341	-3.96234
Q6NXE6	ARMC6	AR02	0.259561	11.6781	2.10014	0.0522204	0.799341	-3.96265
Q9P2E5	CHPF2	AR02	-0.566688	15.2379	-2.09962	0.0522722	0.799341	-3.96305
Q8TBP5	FAM174A	AR02	-0.794474	9.02339	-2.09912	0.0523221	0.799341	-3.96344
Q8N4V1	MMGT1	AR02	0.272514	11.6043	2.09499	0.0527347	0.801757	-3.96666
Q9NWA0	MED9	AR02	-0.661522	10.062	-2.09404	0.0528298	0.801757	-3.9674
Q13148	TARDBP	AR02	-0.271174	14.6429	-2.09313	0.0529213	0.801757	-3.96811
O94760	DDAH1	AR02	0.246272	12.4794	2.08918	0.0533203	0.805565	-3.97119
Q96C19	EFHD2	AR02	-0.214223	18.1668	-2.08652	0.0535903	0.807107	-3.97326
Q96PU5	NEDD4L	AR02	0.246482	13.5055	2.08526	0.0537184	0.807107	-3.97424
P00352	ALDH1A1	AR02	0.24653	14.3088	2.0825	0.0540002	0.808389	-3.97638
Q9P260	RELCH	AR02	0.264475	11.4661	2.08153	0.0541001	0.808389	-3.97714
O14524	NEMP1	AR02	0.446175	9.88589	2.07959	0.0542996	0.808398	-3.97865
Q8NB49	ATP11C	AR02	0.357819	13.7286	2.07864	0.0543972	0.808398	-3.97938
Q9H444	CHMP4B	AR02	-0.567188	14.1134	-2.07546	0.0547262	0.811078	-3.98186
Q9BY27	DGCR6L	AR02	0.34668	12.1397	2.07307	0.0549745	0.811137	-3.98371
Q96JB5	CDK5RAP3	AR02	0.286723	12.4193	2.07026	0.0552671	0.811137	-3.98589
Q9NP81	SARS2	AR02	0.272124	11.2081	2.06969	0.0553272	0.811137	-3.98633
P49662	CASP4	AR02	0.30132	13.5857	2.06906	0.0553932	0.811137	-3.98682
Q9P021	CRIPT	AR02	-0.497246	12.509	-2.06525	0.0557935	0.811137	-3.98977
Q9UG63	ABCF2	AR02	0.273431	11.8461	2.06486	0.0558355	0.811137	-3.99008
O60262	GNG7	AR02	-0.387748	12.1267	-2.06438	0.0558862	0.811137	-3.99045
P35658	NUP214	AR02	-0.209661	13.3279	-2.06406	0.05592	0.811137	-3.9907
Q9H3M7	TXNIP	AR02	-0.202465	14.1747	-2.06174	0.0561654	0.811167	-3.9925
Q04726	TLE3	AR02	0.256139	13.6375	2.05996	0.0563548	0.811167	-3.99388
Q01831	XPC	AR02	-0.296927	11.6191	-2.05846	0.0565153	0.811167	-3.99504
Q6PFW1	PPIP5K1	AR02	0.266617	14.7051	2.05696	0.0566755	0.811167	-3.9962
Q8N5Y2	MSL3	AR02	0.359723	11.4582	2.05433	0.0569572	0.811167	-3.99824
Q13795	ARFRP1	AR02	-0.31591	10.7805	-2.05188	0.0572216	0.811167	-4.00013
Q9BTY7	HGH1	AR02	0.223301	12.3033	2.05185	0.057225	0.811167	-4.00016
Q6P2E9	EDC4	AR02	-0.160531	15.7195	-2.05127	0.0572873	0.811167	-4.0006
Q5J8M3	EMC4	AR02	-0.384157	10.956	-2.05025	0.0573973	0.811167	-4.00139
Q13610	PWP1	AR02	0.545329	9.73988	2.05014	0.0574093	0.811167	-4.00148
Q0PNE2	ELP6	AR02	0.370976	11.2757	2.04619	0.0578387	0.815122	-4.00453
Q92542	NCSTN	AR02	0.181993	13.991	2.03939	0.0585853	0.822515	-4.00979
P28072	PSMB6	AR02	0.177624	14.7599	2.03828	0.0587074	0.822515	-4.01064
Q14116	IL18	AR02	0.242552	14.7846	2.03702	0.0588471	0.822515	-4.01162
Q96EK4	THAP11	AR02	-0.637373	11.411	-2.03594	0.0589665	0.822515	-4.01245
O00418	EEF2K	AR02	0.436558	12.1779	2.03148	0.0594644	0.824842	-4.01589
P61011	SRP54	AR02	0.221487	14.1982	2.02285	0.0604367	0.824842	-4.02254
Q9NZB2	FAM120A	AR02	-0.175762	14.4509	-2.02206	0.0605265	0.824842	-4.02315
P29992	GNA11	AR02	0.320476	14.9845	2.02176	0.0605608	0.824842	-4.02338
Q92945	KHSRP	AR02	-0.184495	15.6533	-2.01894	0.0608823	0.824842	-4.02555
Q9NRD1	FBXO6	AR02	0.642912	11.371	2.01797	0.0609927	0.824842	-4.02629
Q9Y6X3	MAU2	AR02	0.311732	12.3202	2.01528	0.0613012	0.824842	-4.02836
Q04759	PRKCQ	AR02	0.489029	16.0947	2.01492	0.0613423	0.824842	-4.02864
Q86TI2	DPP9	AR02	0.142104	13.5337	2.0114	0.061749	0.824842	-4.03134
Q6Y1H2	HACD2	AR02	-0.427728	11.8373	-2.00997	0.0619149	0.824842	-4.03244
Q9BUQ8	DDX23	AR02	-0.135119	14.8725	-2.00959	0.0619589	0.824842	-4.03273
P11766	ADH5	AR02	0.240608	16.1015	2.00653	0.0623157	0.824842	-4.03509
Q08499	PDE4D	AR02	-0.282328	11.2438	-2.00529	0.0624604	0.824842	-4.03604
O43143	DHX15	AR02	0.137872	16.476	2.00442	0.0625613	0.824842	-4.0367
P46013	MKI67	AR02	-0.285798	12.2868	-2.00333	0.0626893	0.824842	-4.03754
Q9UPN4	CEP131	AR02	0.396439	12.3459	2.0011	0.0629524	0.824842	-4.03925
P20338	RAB4A	AR02	0.20396	13.8196	1.99866	0.0632402	0.824842	-4.04112
P28065	PSMB9	AR02	0.152806	15.7966	1.99574	0.0635861	0.824842	-4.04336
O60437	PPL	AR02	0.237434	13.5546	1.99499	0.0636752	0.824842	-4.04393
O43586	PSTPIP1	AR02	-0.411922	11.6559	-1.99376	0.0638223	0.824842	-4.04488
Q9Y2W2	WBP11	AR02	0.511042	12.2683	1.99359	0.0638426	0.824842	-4.04501
Q9NRY4	ARHGAP35	AR02	0.18674	13.0348	1.98775	0.0645426	0.824842	-4.04948
Q9UK59	DBR1	AR02	-0.193868	12.8691	-1.98609	0.0647424	0.824842	-4.05074
O95139	NDUFB6	AR02	-0.609744	10.0483	-1.98564	0.0647972	0.824842	-4.05109
Q9GZN7	ROGDI	AR02	0.58452	11.6195	1.98146	0.0653041	0.824842	-4.05428
Q8IV50	LYSMD2	AR02	0.299666	12.5742	1.98047	0.0654252	0.824842	-4.05504
Q9NWZ3	IRAK4	AR02	-0.242213	12.3703	-1.98038	0.065436	0.824842	-4.05511
Q7Z4G1	COMMD6	AR02	-0.323873	11.4996	-1.97717	0.0658291	0.824842	-4.05756
P0C025	NUDT17	AR02	0.348646	11.1942	1.97663	0.0658945	0.824842	-4.05797
Q9Y6K0	CEPT1	AR02	-0.198239	14.4734	-1.97472	0.0661297	0.824842	-4.05943
P13612	ITGA4	AR02	0.374594	12.8159	1.97213	0.06645	0.824842	-4.06141
Q07890	SOS2	AR02	-0.20311	12.5718	-1.97082	0.0666113	0.824842	-4.0624
Q9UK45	LSM7	AR02	0.514759	14.5414	1.9708	0.0666146	0.824842	-4.06242
P50402	EMD	AR02	-0.26126	13.1937	-1.97054	0.0666469	0.824842	-4.06262
Q9Y3A3	MOB4	AR02	0.429135	11.5084	1.96977	0.0667425	0.824842	-4.06321
P26599	PTBP1	AR02	-0.22338	16.9468	-1.9686	0.066887	0.824842	-4.06409
Q9BW85	YJU2	AR02	-0.391588	12.8191	-1.96826	0.0669296	0.824842	-4.06435
P56211	ARPP19	AR02	-0.26347	14.5893	-1.96682	0.0671097	0.824842	-4.06545
O95749	GGPS1	AR02	0.276032	12.9201	1.96672	0.0671222	0.824842	-4.06553
P53367	ARFIP1	AR02	-0.252567	13.3713	-1.96657	0.0671403	0.824842	-4.06564
Q5MNZ6	WDR45B	AR02	-0.291384	11.906	-1.96358	0.067515	0.824842	-4.06792
P02749	APOH	AR02	0.294966	13.1949	1.96348	0.0675276	0.824842	-4.068
Q96PK6	RBM14	AR02	-0.207903	14.672	-1.9623	0.0676759	0.824842	-4.06889
Q15397	PUM3	AR02	0.294664	11.367	1.9602	0.0679402	0.824842	-4.07049
Q9H488	POFUT1	AR02	-0.257814	12.9241	-1.95954	0.0680238	0.824842	-4.07099
Q96FH0	BORCS8	AR02	0.233075	12.4976	1.95921	0.0680658	0.824842	-4.07125
P51617	IRAK1	AR02	-0.49305	10.7475	-1.95831	0.0681786	0.824842	-4.07192
Q8IV04	TBC1D10C	AR02	-0.260367	14.8425	-1.95537	0.0685522	0.824842	-4.07416
P14678	SNRPB	AR02	0.194176	17.3393	1.95493	0.0686077	0.824842	-4.07449
O76096	CST7	AR02	0.3998	12.8995	1.95481	0.0686237	0.824842	-4.07459
Q13952	NFYC	AR02	0.239886	13.3988	1.95433	0.0686844	0.824842	-4.07495
O43583	DENR	AR02	0.464097	13.6354	1.95315	0.0688353	0.824842	-4.07585
Q7Z401	DENND4A	AR02	-0.217859	12.1934	-1.9474	0.069573	0.824842	-4.08022
Q8NFH5	NUP35	AR02	-0.265127	12.0714	-1.947	0.0696249	0.824842	-4.08052
Q9Y2K2	SIK3	AR02	-0.307298	12.6629	-1.94627	0.0697185	0.824842	-4.08107
P98171	ARHGAP4	AR02	-0.159633	16.1711	-1.9451	0.0698704	0.824842	-4.08196
Q8WVJ2	NUDCD2	AR02	0.241517	13.1326	1.94308	0.0701322	0.824842	-4.08349
Q10570	CPSF1	AR02	0.167465	13.5738	1.94282	0.0701654	0.824842	-4.08369
P28066	PSMA5	AR02	-0.233944	14.4102	-1.94282	0.0701654	0.824842	-4.08369
Q13907	IDI1	AR02	0.360952	10.7168	1.94278	0.0701714	0.824842	-4.08372
Q00325	SLC25A3	AR02	-0.207672	16.875	-1.94206	0.0702646	0.824842	-4.08426
Q9Y3Q8	TSC22D4	AR02	0.167208	13.4984	1.93902	0.0706611	0.824842	-4.08657
P62314	SNRPD1	AR02	0.293871	15.5491	1.93869	0.0707047	0.824842	-4.08682
Q9P2N5	RBM27	AR02	-0.221019	12.318	-1.93762	0.0708449	0.824842	-4.08763
P25105	PTAFR	AR02	-0.686836	10.1063	-1.93608	0.0710465	0.824842	-4.08879
Q9C0B7	TANGO6	AR02	-0.57095	10.1427	-1.93585	0.0710766	0.824842	-4.08897
Q8N423		AR02	-0.474322	14.1904	-1.9321	0.0715713	0.824842	-4.09181
Q8IUE6	H2AC21	AR02	0.8588	15.612	1.93208	0.0715742	0.824842	-4.09182
P17275	JUNB	AR02	-0.958111	10.189	-1.93204	0.0715795	0.824842	-4.09185
Q9NPA0	EMC7	AR02	-0.227145	11.7113	-1.93	0.0718498	0.824842	-4.0934
P13747	HLA-E	AR02	-0.546339	11.7954	-1.92567	0.0724259	0.824842	-4.09666
Q9C0D5	TANC1	AR02	-0.538853	15.0197	-1.9228	0.0728105	0.824842	-4.09883
Q7Z478	DHX29	AR02	0.27228	12.1567	1.92161	0.0729709	0.824842	-4.09973
O00507	USP9Y	AR02	0.131467	14.7933	1.9216	0.0729724	0.824842	-4.09974
O76031	CLPX	AR02	0.458697	14.342	1.92157	0.0729769	0.824842	-4.09977
Q01804	OTUD4	AR02	0.366818	10.2028	1.92124	0.0730209	0.824842	-4.10001
P32019	INPP5B	AR02	-0.257069	11.8761	-1.92118	0.0730291	0.824842	-4.10006
P28340	POLD1	AR02	0.462131	10.2381	1.91843	0.0733998	0.824842	-4.10213
Q8IYB5	SMAP1	AR02	0.576968	11.0902	1.91766	0.0735045	0.824842	-4.10271
Q9UHV9	PFDN2	AR02	0.235465	14.6913	1.91687	0.0736115	0.824842	-4.10331
Q9BWU0	SLC4A1AP	AR02	-0.20871	12.7679	-1.91427	0.0739641	0.824842	-4.10526
Q9UJZ1	STOML2	AR02	-0.249827	13.1539	-1.91402	0.073999	0.824842	-4.10546
Q9H1U4	MEGF9	AR02	0.234461	13.5996	1.90954	0.0746113	0.824842	-4.10883
P22694	PRKACB	AR02	0.515938	12.1047	1.90781	0.0748492	0.824842	-4.11013
Q9UK39	NOCT	AR02	0.35175	11.4356	1.90646	0.075035	0.824842	-4.11114
A8MVJ9		AR02	0.299414	12.1776	1.90634	0.0750515	0.824842	-4.11123
Q9H7D7	WDR26	AR02	0.286472	12.4657	1.90572	0.0751382	0.824842	-4.11171
Q9P0J0	NDUFA13	AR02	-0.289409	15.0058	-1.90313	0.0754963	0.824842	-4.11365
Q9Y2X0	MED16	AR02	-0.360572	11.0199	-1.90291	0.0755262	0.824842	-4.11381
Q75N03	CBLL1	AR02	-0.417003	10.7725	-1.90096	0.0757977	0.824842	-4.11528
Q6ZT21	TMPPE	AR02	0.304098	12.0954	1.90049	0.0758635	0.824842	-4.11564
P60981	DSTN	AR02	0.280323	14.2645	1.89896	0.0760763	0.824842	-4.11678
Q5VT06	CEP350	AR02	-0.171345	14.7235	-1.89705	0.0763447	0.824842	-4.11822
Q68CZ6	HAUS3	AR02	-0.318639	10.2968	-1.89457	0.076692	0.824842	-4.12008
Q86U86	PBRM1	AR02	-0.186126	13.8129	-1.89277	0.0769461	0.824842	-4.12143
Q96QH2	PRAM1	AR02	-0.233469	15.9259	-1.89243	0.0769948	0.824842	-4.12169
Q96S19	METTL26	AR02	-0.386083	9.80867	-1.89152	0.0771227	0.824842	-4.12237
Q9Y2G2	CARD8	AR02	0.157185	12.5925	1.88985	0.0773589	0.824842	-4.12362
Q9UJY4	GGA2	AR02	0.399428	12.5745	1.88968	0.0773833	0.824842	-4.12375
Q13428	TCOF1	AR02	-0.274728	12.8164	-1.88809	0.0776095	0.824842	-4.12494
P60900	PSMA6	AR02	0.126627	16.7127	1.88763	0.077675	0.824842	-4.12528
O95400	CD2BP2	AR02	-0.269697	12.4315	-1.88756	0.0776843	0.824842	-4.12533
Q49AM3	TTC31	AR02	0.257877	16.7345	1.88755	0.0776863	0.824842	-4.12534
Q96MU7	YTHDC1	AR02	0.364316	12.6481	1.88747	0.0776968	0.824842	-4.1254
Q5BKY9	FAM133B	AR02	-0.553558	9.45793	-1.88682	0.0777897	0.824842	-4.12589
Q9Y6B7	AP4B1	AR02	0.265613	11.2315	1.88452	0.0781188	0.824842	-4.12761
Q96CP6	GRAMD1A	AR02	-0.194567	14.533	-1.88435	0.0781427	0.824842	-4.12774
Q5VWZ2	LYPLAL1	AR02	-0.253726	13.0492	-1.8815	0.0785514	0.824842	-4.12987
Q12996	CSTF3	AR02	-0.200968	13.7122	-1.88061	0.0786797	0.824842	-4.13054
Q9Y277	VDAC3	AR02	0.189006	15.0887	1.87787	0.0790742	0.824842	-4.13258
P22234	PAICS	AR02	0.112757	15.2149	1.87727	0.0791615	0.824842	-4.13303
P53602	MVD	AR02	0.235997	12.1972	1.87568	0.0793924	0.824842	-4.13422
Q8IXM6	NRM	AR02	0.182507	14.304	1.87466	0.0795404	0.824842	-4.13498
Q9H1E5	TMX4	AR02	0.194087	13.9568	1.87435	0.0795849	0.824842	-4.13521
Q00169	PITPNA	AR02	-0.174822	15.5131	-1.87309	0.0797688	0.824842	-4.13615
P08237	PFKM	AR02	-0.196161	14.227	-1.87183	0.0799524	0.824842	-4.13709
P01011	SERPINA3	AR02	0.24446	13.7911	1.87011	0.0802038	0.824842	-4.13838
P24158	PRTN3	AR02	0.230924	21.6786	1.87	0.0802207	0.824842	-4.13846
Q13084	MRPL28	AR02	0.654774	12.1751	1.86966	0.0802704	0.824842	-4.13872
Q8N668	COMMD1	AR02	-0.2598	12.4488	-1.86829	0.0804709	0.824842	-4.13973
O75791	GRAP2	AR02	-0.32723	12.4392	-1.86651	0.0807331	0.824842	-4.14106
Q9NRD5	PICK1	AR02	-0.372142	12.1509	-1.86446	0.0810354	0.824842	-4.14259
O75427	LRCH4	AR02	-0.206538	13.9732	-1.86394	0.081113	0.824842	-4.14298
Q14203	DCTN1	AR02	-0.183807	14.7258	-1.8635	0.081178	0.824842	-4.14331
Q9Y2Z4	YARS2	AR02	-0.677638	9.49022	-1.86332	0.0812048	0.824842	-4.14344
Q5SZL2	CEP85L	AR02	-0.520442	13.2753	-1.86282	0.0812776	0.824842	-4.14381
O75150	RNF40	AR02	-0.317919	12.2651	-1.86245	0.0813328	0.824842	-4.14409
Q68EM7	ARHGAP17	AR02	-0.174407	13.5971	-1.86205	0.0813923	0.824842	-4.14438
Q96BP3	PPWD1	AR02	-0.185358	16.7865	-1.86197	0.0814038	0.824842	-4.14444
Q9NZN3	EHD3	AR02	0.267468	14.0252	1.86176	0.0814349	0.824842	-4.1446
O60547	GMDS	AR02	-0.189854	13.8362	-1.86172	0.0814416	0.824842	-4.14463
O00443	PIK3C2A	AR02	-0.445589	13.6029	-1.86132	0.0815002	0.824842	-4.14493
Q9NPF5	DMAP1	AR02	-0.301564	12.8439	-1.85991	0.0817106	0.824842	-4.14598
Q9BXW7	HDHD5	AR02	-0.286125	11.7681	-1.85934	0.0817956	0.824842	-4.1464
P02750	LRG1	AR02	0.338853	14.3449	1.8593	0.0818017	0.824842	-4.14643
O95372	LYPLA2	AR02	-0.203139	13.2489	-1.85764	0.0820484	0.824842	-4.14766
A0A1B0GUS4		AR02	-0.338997	15.378	-1.85699	0.0821466	0.824842	-4.14815
P10768	ESD	AR02	-0.139756	16.5899	-1.85645	0.0822278	0.824842	-4.14856
Q9BSR8	YIPF4	AR02	-0.37237	12.3104	-1.85602	0.0822909	0.824842	-4.14887
Q96AY4	TTC28	AR02	-0.398058	16.2354	-1.85578	0.0823271	0.824842	-4.14905
O95831	AIFM1	AR02	0.146821	13.3506	1.85526	0.0824059	0.824842	-4.14944
Q3KQV9	UAP1L1	AR02	0.609359	11.9569	1.85282	0.082773	0.824842	-4.15125
Q8TCG1	CIP2A	AR02	-0.480623	10.2639	-1.84931	0.0833023	0.824842	-4.15386
Q9BT40	INPP5K	AR02	0.371433	10.1945	1.84905	0.0833412	0.824842	-4.15405
Q8ND76	CCNY	AR02	-0.284443	12.8524	-1.84809	0.0834872	0.824842	-4.15476
P11388	TOP2A	AR02	-0.209028	12.0838	-1.84698	0.0836559	0.824842	-4.15559
Q969P6	TOP1MT	AR02	0.777522	14.6707	1.84694	0.0836618	0.824842	-4.15561
Q9Y251	HPSE	AR02	0.442141	10.8393	1.8468	0.0836833	0.824842	-4.15572
O75828	CBR3	AR02	0.626049	12.9468	1.84521	0.0839249	0.824842	-4.1569
Q9UBQ0	VPS29	AR02	0.204146	14.2454	1.84442	0.0840467	0.824842	-4.15749
Q15223	NECTIN1	AR02	-0.414973	10.7083	-1.84156	0.0844845	0.824842	-4.15961
P31483	TIA1	AR02	0.149399	14.6561	1.84019	0.0846945	0.824842	-4.16062
Q9Y478	PRKAB1	AR02	0.325078	14.2056	1.83808	0.085019	0.824842	-4.16218
Q15286	RAB35	AR02	0.219908	16.396	1.83802	0.0850276	0.824842	-4.16222
O15541	RNF113A	AR02	0.296695	10.5793	1.83789	0.0850487	0.824842	-4.16232
Q6PD74	AAGAB	AR02	-0.293512	11.3042	-1.83719	0.0851569	0.824842	-4.16284
Q8TCA0	LRRC20	AR02	0.385229	11.7459	1.83705	0.0851787	0.824842	-4.16295
A8MW92	PHF20L1	AR02	-0.342184	11.6776	-1.83658	0.0852504	0.824842	-4.16329
Q5XPI4	RNF123	AR02	0.196894	12.5239	1.8357	0.0853863	0.824842	-4.16394
Q9Y3R5	DOP1B	AR02	-0.148902	14.6281	-1.83519	0.0854661	0.824842	-4.16432
Q9NXC2	GFOD1	AR02	0.251526	12.3293	1.83499	0.0854969	0.824842	-4.16447
P62191	PSMC1	AR02	0.140971	14.8154	1.83427	0.0856083	0.824842	-4.165
Q16186	ADRM1	AR02	0.301445	13.3486	1.83419	0.0856215	0.824842	-4.16506
Q9NPA8	ENY2	AR02	0.386365	12.324	1.83344	0.0857382	0.824842	-4.16562
P98088	MUC5AC	AR02	-0.566159	17.1921	-1.83315	0.0857819	0.824842	-4.16583
Q32M88	PGGHG	AR02	0.259237	11.5197	1.83192	0.0859746	0.824842	-4.16674
Q8WUF8	FAM172A	AR02	0.279228	11.3441	1.82952	0.0863479	0.824842	-4.16851
Q96BZ4	PLD4	AR02	0.246112	11.9988	1.82777	0.0866225	0.824842	-4.1698
Q96QC0	PPP1R10	AR02	0.196282	11.9793	1.82706	0.0867339	0.824842	-4.17033
Q9Y2H1	STK38L	AR02	-0.247846	13.6338	-1.82582	0.0869286	0.824842	-4.17124
Q9NWS0	PIH1D1	AR02	-0.623435	9.80414	-1.8256	0.0869634	0.824842	-4.1714
Q8TB24	RIN3	AR02	-0.364134	13.6943	-1.82484	0.0870838	0.824842	-4.17197
Q9NR50	EIF2B3	AR02	-0.203617	12.395	-1.82358	0.0872815	0.824842	-4.17289
Q8NHG7	SVIP	AR02	-0.462562	14.6693	-1.82264	0.0874308	0.824842	-4.17359
Q8N0X7	SPART	AR02	-0.273762	11.3802	-1.82197	0.087537	0.824842	-4.17409
Q15843	NEDD8	AR02	0.295549	14.6215	1.82107	0.0876794	0.824842	-4.17475
P08134	RHOC	AR02	0.236862	18.8007	1.82068	0.0877413	0.824842	-4.17504
P02794	FTH1	AR02	0.172916	12.4762	1.82038	0.0877884	0.824842	-4.17526
P61966	AP1S1	AR02	0.302794	12.0272	1.81966	0.0879032	0.824842	-4.17579
Q8N5J2	MINDY1	AR02	-0.218487	13.668	-1.81917	0.0879801	0.824842	-4.17614
Q6MZP7	LIN54	AR02	-0.596789	8.93335	-1.81868	0.0880585	0.824842	-4.17651
Q9H6Q4	CIAO3	AR02	0.374494	11.3925	1.81777	0.088204	0.824842	-4.17718
O60234	GMFG	AR02	0.423569	17.0591	1.81765	0.0882228	0.824842	-4.17727
Q6DD87	ZNF787	AR02	-0.261414	11.9009	-1.81548	0.088569	0.824842	-4.17886
Q9BZE4	GTPBP4	AR02	-0.191727	12.7363	-1.81536	0.0885888	0.824842	-4.17896
Q9BUP3	HTATIP2	AR02	0.211141	14.6688	1.81472	0.0886914	0.824842	-4.17943
Q9BPZ7	MAPKAP1	AR02	0.587425	10.1632	1.81361	0.0888688	0.824842	-4.18024
O95210	STBD1	AR02	-0.262097	15.9159	-1.81291	0.0889817	0.824842	-4.18076
Q02978	SLC25A11	AR02	0.184233	15.1471	1.81254	0.0890408	0.824842	-4.18103
O43299	AP5Z1	AR02	0.347326	11.5586	1.81242	0.0890594	0.824842	-4.18111
Q8NB16	MLKL	AR02	-0.162288	14.9662	-1.81231	0.0890767	0.824842	-4.18119
Q9H8H0	NOL11	AR02	0.525431	10.7171	1.81039	0.0893861	0.824842	-4.18261
Q7Z406	MYH14	AR02	0.503185	17.8987	1.80983	0.0894775	0.824842	-4.18302
Q14789	GOLGB1	AR02	-0.2489	12.6889	-1.80681	0.0899646	0.824842	-4.18524
P35237	SERPINB6	AR02	-0.158351	14.8168	-1.80601	0.090096	0.824842	-4.18583
Q13422	IKZF1	AR02	0.284572	11.4947	1.80369	0.090473	0.824842	-4.18753
Q15057	ACAP2	AR02	-0.159008	15.6561	-1.80299	0.090586	0.824842	-4.18804
Q9NZL4	HSPBP1	AR02	0.181539	12.3711	1.80271	0.0906319	0.824842	-4.18825
Q9Y4P1	ATG4B	AR02	-0.209698	13.7013	-1.80271	0.0906332	0.824842	-4.18825
Q99878	H2AC14	AR02	-0.365713	17.8604	-1.80269	0.0906354	0.824842	-4.18826
P56159	GFRA1	AR02	0.328062	12.4961	1.80228	0.0907024	0.824842	-4.18856
Q9UBI1	COMMD3	AR02	0.188448	13.615	1.80198	0.0907513	0.824842	-4.18878
Q9UBE0	SAE1	AR02	0.199769	13.7198	1.80165	0.0908053	0.824842	-4.18902
L0R6Q1		AR02	0.293735	13.3253	1.80043	0.0910046	0.824842	-4.18992
Q8WU76	SCFD2	AR02	0.232541	11.3727	1.7984	0.0913381	0.824842	-4.19141
Q6YN16	HSDL2	AR02	0.190063	12.9831	1.79662	0.0916307	0.824842	-4.19271
Q9NXE8	CWC25	AR02	-0.47237	10.596	-1.79659	0.0916368	0.824842	-4.19274
Q9NQX3	GPHN	AR02	-0.217124	12.686	-1.79508	0.0918859	0.824842	-4.19384
Q9UKN8	GTF3C4	AR02	-0.333898	11.1369	-1.79389	0.0920816	0.824842	-4.19471
Q9BRT8	ZNG1A	AR02	0.292328	12.2702	1.79284	0.0922558	0.824842	-4.19548
P49257	LMAN1	AR02	-0.249279	14.5202	-1.7908	0.0925956	0.824842	-4.19698
Q9H9A5	CNOT10	AR02	0.229222	11.5802	1.79	0.0927278	0.824842	-4.19756
Q8N2F6	ARMC10	AR02	0.170223	16.2059	1.78875	0.0929368	0.824842	-4.19847
Q9BRG1	VPS25	AR02	0.236022	14.104	1.78762	0.0931247	0.824842	-4.19929
Q9UBW5	BIN2	AR02	-0.350479	14.9833	-1.78719	0.0931964	0.824842	-4.19961
Q9H9P8	L2HGDH	AR02	0.303935	11.6212	1.78678	0.0932665	0.824842	-4.19991
Q96E11	MRRF	AR02	0.273955	11.6222	1.78422	0.0936959	0.824842	-4.20178
P20073	ANXA7	AR02	0.155863	16.5616	1.7827	0.0939516	0.824842	-4.20289
Q8TD84	DSCAML1	AR02	0.342502	13.1334	1.78256	0.093974	0.824842	-4.20299
O95197	RTN3	AR02	-0.44435	17.2082	-1.78253	0.0939793	0.824842	-4.20301
O60641	SNAP91	AR02	0.322927	14.9069	1.7823	0.0940175	0.824842	-4.20318
Q9Y266	NUDC	AR02	-0.305864	13.3075	-1.78171	0.0941183	0.824842	-4.20361
Q6PID8	KLHDC10	AR02	0.634341	10.9824	1.77932	0.0945223	0.824842	-4.20536
Q9BYX2	TBC1D2	AR02	-0.374222	11.8129	-1.77896	0.094582	0.824842	-4.20561
P61353	RPL27	AR02	-0.461048	13.1023	-1.77855	0.0946523	0.824842	-4.20592
Q00526	CDK3	AR02	0.734305	12.1313	1.77573	0.0951317	0.824842	-4.20797
P19634	SLC9A1	AR02	-0.185757	12.4277	-1.77535	0.0951961	0.824842	-4.20825
P05141	SLC25A5	AR02	0.185619	17.2941	1.7742	0.0953927	0.824842	-4.20909
P07996	THBS1	AR02	0.279462	16.0538	1.7735	0.0955129	0.824842	-4.2096
Q6UWD8	C16orf54	AR02	-0.335576	11.6932	-1.77307	0.0955848	0.824842	-4.2099
P20292	ALOX5AP	AR02	0.339233	18.9099	1.77241	0.0956991	0.824842	-4.21039
P62330	ARF6	AR02	-0.14604	17.2877	-1.77077	0.0959806	0.824842	-4.21158
O15265	ATXN7	AR02	0.42211	11.1841	1.77004	0.0961051	0.824842	-4.21211
Q99102	MUC4	AR02	0.776971	13.8587	1.77001	0.0961101	0.824842	-4.21213
Q5TCZ1	SH3PXD2A	AR02	0.19808	14.8438	1.76598	0.0968047	0.824842	-4.21506
Q9Y6V7	DDX49	AR02	-0.458172	8.86762	-1.76554	0.0968819	0.824842	-4.21538
O60870	KIN	AR02	-0.659136	9.77562	-1.76516	0.0969465	0.824842	-4.21566
P49721	PSMB2	AR02	0.193119	15.915	1.76364	0.0972114	0.824842	-4.21676
Q9NQE9	HINT3	AR02	-0.337749	12.5082	-1.76205	0.0974878	0.824842	-4.21792
Q9Y520	PRRC2C	AR02	-0.180711	14.7702	-1.76196	0.0975022	0.824842	-4.21798
O15027	SEC16A	AR02	-0.166828	14.1946	-1.76185	0.0975221	0.824842	-4.21806
Q8IWU2	LMTK2	AR02	-0.188996	13.213	-1.75995	0.0978534	0.824842	-4.21944
Q9BZL6	PRKD2	AR02	-0.176669	12.4066	-1.75802	0.0981898	0.824842	-4.22083
P23229	ITGA6	AR02	0.335123	12.1769	1.75802	0.0981904	0.824842	-4.22084
Q8IYD1	GSPT2	AR02	0.181105	13.325	1.75688	0.0983904	0.824842	-4.22166
Q7Z7H5	TMED4	AR02	0.183336	14.0478	1.75643	0.0984692	0.824842	-4.22199
Q9P0S3	ORMDL1	AR02	0.345153	13.291	1.7552	0.0986851	0.824842	-4.22288
P14735	IDE	AR02	0.147574	13.7381	1.75459	0.0987923	0.824842	-4.22332
Q15173	PPP2R5B	AR02	-0.30265	10.9565	-1.75435	0.0988349	0.824842	-4.2235
Q9BR61	ACBD6	AR02	0.440541	10.7022	1.75422	0.0988573	0.824842	-4.22359
Q8NFA0	USP32	AR02	0.253978	10.8173	1.75396	0.0989039	0.824842	-4.22378
P17706	PTPN2	AR02	-0.216696	12.9882	-1.75387	0.0989192	0.824842	-4.22384
P13284	IFI30	AR02	0.44596	12.7712	1.75258	0.0991467	0.824842	-4.22478
Q9H8Y8	GORASP2	AR02	-0.295443	13.0951	-1.75229	0.099198	0.824842	-4.22499
Q9UL26	RAB22A	AR02	0.470188	13.4022	1.75221	0.0992132	0.824842	-4.22505
Q9BYM8	RBCK1	AR02	0.183878	12.815	1.75181	0.0992827	0.824842	-4.22533
Q99590	SCAF11	AR02	-0.270161	11.0796	-1.75084	0.0994556	0.824842	-4.22604
Q9NQ94	A1CF	AR02	-0.529516	11.3593	-1.75024	0.0995617	0.824842	-4.22647
P25786	PSMA1	AR02	0.135275	15.7199	1.75024	0.0995622	0.824842	-4.22647
O94886	TMEM63A	AR02	-0.139789	15.477	-1.74919	0.0997478	0.824842	-4.22723
P01893		AR02	-0.473991	12.7579	-1.74892	0.0997953	0.824842	-4.22742
Q9GZT8	NIF3L1	AR02	0.199522	13.523	1.74854	0.0998626	0.824842	-4.2277
Q13404	UBE2V1	AR02	-0.134807	16.3637	-1.74799	0.0999602	0.824842	-4.22809
Q92917	GPKOW	AR02	-0.283314	11.6746	-1.74778	0.0999976	0.824842	-4.22825
Q15102	PAFAH1B3	AR02	0.150063	14.7349	1.74624	0.100273	0.824842	-4.22936
O00571	DDX3X	AR02	0.117564	15.0888	1.74606	0.100305	0.824842	-4.22949
Q14686	NCOA6	AR02	-0.258697	11.6378	-1.74537	0.100428	0.824842	-4.22999
Q99856	ARID3A	AR02	-0.316047	12.4324	-1.7417	0.101086	0.824842	-4.23264
Q9H019	MTFR1L	AR02	-0.430428	11.0555	-1.74146	0.101128	0.824842	-4.23281
Q6ZRI6	C15orf39	AR02	0.263675	11.4635	1.73989	0.101412	0.824842	-4.23395
P35813	PPM1A	AR02	-0.142022	14.5005	-1.73949	0.101483	0.824842	-4.23423
Q96FS4	SIPA1	AR02	-0.136738	16.0624	-1.7394	0.101499	0.824842	-4.2343
O14828	SCAMP3	AR02	-0.46822	12.6566	-1.73935	0.101508	0.824842	-4.23433
Q9NY27	PPP4R2	AR02	0.203287	12.1212	1.73915	0.101544	0.824842	-4.23447
O43676	NDUFB3	AR02	0.174574	13.7449	1.7386	0.101643	0.824842	-4.23487
P62304	SNRPE	AR02	0.262506	16.7709	1.73854	0.101655	0.824842	-4.23492
P08069	IGF1R	AR02	-0.364224	10.7242	-1.7383	0.101697	0.824842	-4.23509
Q58A45	PAN3	AR02	0.21555	11.5559	1.73813	0.101728	0.824842	-4.23521
Q9BUR5	APOO	AR02	-0.309152	11.1843	-1.73777	0.101793	0.824842	-4.23547
Q6FI81	CIAPIN1	AR02	-0.290459	12.5159	-1.73665	0.101997	0.824842	-4.23628
Q9BT23	LIMD2	AR02	0.239126	13.9829	1.73661	0.102003	0.824842	-4.23631
P61803	DAD1	AR02	0.231256	15.0252	1.73599	0.102116	0.824842	-4.23675
P49720	PSMB3	AR02	0.266818	14.0952	1.73493	0.102308	0.824842	-4.23752
P52907	CAPZA1	AR02	-0.250485	18.3899	-1.73476	0.102339	0.824842	-4.23764
O43318	MAP3K7	AR02	0.331939	12.51	1.7345	0.102386	0.824842	-4.23783
Q96C11	FGGY	AR02	-0.308252	11.8101	-1.7345	0.102387	0.824842	-4.23783
O96018	APBA3	AR02	0.457929	11.3207	1.73292	0.102673	0.82593	-4.23896
Q16864	ATP6V1F	AR02	-0.24755	12.8485	-1.72983	0.103237	0.829243	-4.24119
Q7Z6J0	SH3RF1	AR02	0.310535	11.5133	1.72819	0.103538	0.829641	-4.24237
P36578	RPL4	AR02	-0.21506	15.691	-1.7279	0.103591	0.829641	-4.24257
Q9P2E3	ZNFX1	AR02	0.29068	13.3882	1.72629	0.103888	0.830798	-4.24373
Q5T6V5	QNG1	AR02	0.232503	12.7523	1.72541	0.10405	0.830874	-4.24437
O15397	IPO8	AR02	0.220398	12.1987	1.72434	0.104245	0.83122	-4.24513
P49336	CDK8	AR02	0.353852	12.361	1.72123	0.104822	0.834266	-4.24736
Q9NS93	TM7SF3	AR02	-0.340658	12.7434	-1.7206	0.104939	0.834266	-4.24782
Q4KMQ2	ANO6	AR02	0.202955	13.9774	1.71902	0.105231	0.834266	-4.24894
P04150	NR3C1	AR02	-0.185417	12.2403	-1.71887	0.105259	0.834266	-4.24905
Q9BQ61	TRIR	AR02	-0.443156	13.7616	-1.716	0.105795	0.834266	-4.25111
Q9Y2E4	DIP2C	AR02	-0.31172	13.1614	-1.71384	0.1062	0.834266	-4.25265
O43913	ORC5	AR02	0.299275	11.0251	1.71321	0.106317	0.834266	-4.2531
Q9UP95	SLC12A4	AR02	0.188072	13.0426	1.71182	0.106579	0.834266	-4.2541
Q9NUM4	TMEM106B	AR02	-0.316223	11.2815	-1.71052	0.106824	0.834266	-4.25503
O75582	RPS6KA5	AR02	-0.183264	13.0144	-1.70796	0.107308	0.834266	-4.25686
Q99698	LYST	AR02	-0.149603	13.3178	-1.70544	0.107785	0.834266	-4.25866
Q9ULM6		AR02	0.310943	11.2124	1.70496	0.107876	0.834266	-4.259
Q9UHN6	CEMIP2	AR02	0.132974	13.3995	1.70454	0.107956	0.834266	-4.2593
P62861		AR02	-0.546905	15.1931	-1.70276	0.108294	0.834266	-4.26057
Q8N5C6	SRBD1	AR02	-0.195727	11.9092	-1.70262	0.108322	0.834266	-4.26067
O14657	TOR1B	AR02	0.177202	11.8125	1.70213	0.108415	0.834266	-4.26101
Q9NUE0	ZDHHC18	AR02	-0.620686	11.4476	-1.70164	0.108509	0.834266	-4.26137
Q9Y6M4	CSNK1G3	AR02	-0.193746	12.6317	-1.70128	0.108578	0.834266	-4.26162
P63027	VAMP2	AR02	-0.614819	14.8564	-1.7009	0.10865	0.834266	-4.26189
O15145	ARPC3	AR02	0.136351	17.95	1.70076	0.108678	0.834266	-4.262
Q9BVK6	TMED9	AR02	0.185413	16.6273	1.70042	0.108743	0.834266	-4.26224
P49915	GMPS	AR02	0.148065	13.4999	1.69953	0.108913	0.834266	-4.26287
P50993	ATP1A2	AR02	-0.278545	12.595	-1.69937	0.108943	0.834266	-4.26298
Q86UV5	USP48	AR02	0.448229	11.0806	1.69923	0.108971	0.834266	-4.26309
P38919	EIF4A3	AR02	0.12863	15.3237	1.69912	0.108991	0.834266	-4.26316
Q9BXB7	SPATA16	AR02	0.585924	15.8671	1.69707	0.109386	0.834266	-4.26462
Q9BT22	ALG1	AR02	-0.237013	11.8445	-1.69688	0.109421	0.834266	-4.26476
Q7Z7E8	UBE2Q1	AR02	0.208435	11.3918	1.69671	0.109455	0.834266	-4.26488
Q8NI27	THOC2	AR02	0.153563	12.8829	1.6958	0.10963	0.834266	-4.26552
P10242	MYB	AR02	-0.344263	12.3642	-1.69415	0.109948	0.834266	-4.2667
Q16595	FXN	AR02	0.333725	11.9698	1.69389	0.109999	0.834266	-4.26689
P23284	PPIB	AR02	0.152182	17.7589	1.69294	0.110183	0.834266	-4.26756
O95466	FMNL1	AR02	-0.181856	16.6444	-1.6927	0.11023	0.834266	-4.26773
P57721	PCBP3	AR02	-0.177171	16.7534	-1.69242	0.110283	0.834266	-4.26793
O75298	RTN2	AR02	-0.412973	11.2557	-1.69214	0.110337	0.834266	-4.26813
Q9BTE6	AARSD1	AR02	0.242266	11.6321	1.69109	0.110542	0.834266	-4.26888
Q13177	PAK2	AR02	-0.184012	16.2735	-1.69019	0.110717	0.834266	-4.26952
P48735	IDH2	AR02	0.137166	15.8182	1.68899	0.11095	0.834266	-4.27037
Q9C0D3	ZYG11B	AR02	0.229596	10.9385	1.6888	0.110988	0.834266	-4.2705
Q9UJU6	DBNL	AR02	-0.184666	16.6534	-1.68871	0.111005	0.834266	-4.27057
Q9UK53	ING1	AR02	-0.646612	9.82412	-1.68802	0.111139	0.834266	-4.27106
P09622	DLD	AR02	0.19298	13.8626	1.68712	0.111315	0.834266	-4.2717
Q9H0Z9	RBM38	AR02	0.687417	15.6689	1.68664	0.111409	0.834266	-4.27204
O60220	TIMM8A	AR02	0.183938	12.7556	1.68643	0.111449	0.834266	-4.27218
Q13868	EXOSC2	AR02	0.173747	13.1486	1.68565	0.111602	0.834266	-4.27274
Q96NJ6	ZFP3	AR02	0.571827	12.372	1.68444	0.11184	0.834266	-4.2736
Q9P1F3	ABRACL	AR02	-0.363582	15.0798	-1.68342	0.11204	0.834266	-4.27432
Q9Y3C0	WASHC3	AR02	-0.288884	12.4004	-1.68258	0.112204	0.834266	-4.27491
Q96DI7	SNRNP40	AR02	-0.165786	12.8083	-1.68223	0.112274	0.834266	-4.27516
P35609	ACTN2	AR02	-0.504126	13.2672	-1.68163	0.112392	0.834266	-4.27559
Q9UJX3	ANAPC7	AR02	-0.192288	12.321	-1.68099	0.112518	0.834266	-4.27604
Q01970	PLCB3	AR02	0.179214	11.7962	1.68067	0.112581	0.834266	-4.27627
Q9H8M2	BRD9	AR02	0.312092	10.9109	1.67903	0.112905	0.834641	-4.27743
P08631	HCK	AR02	-0.309931	15.8979	-1.67886	0.112938	0.834641	-4.27755
Q6F5E8	CARMIL2	AR02	0.562733	14.1705	1.67592	0.113521	0.836146	-4.27963
P42336	PIK3CA	AR02	-0.337321	9.98599	-1.67531	0.113642	0.836146	-4.28006
O95696	BRD1	AR02	0.239434	13.9984	1.67473	0.113758	0.836146	-4.28047
P29083	GTF2E1	AR02	-0.876485	8.77604	-1.67443	0.113818	0.836146	-4.28068
Q9Y6Y0	IVNS1ABP	AR02	0.214542	12.9326	1.67366	0.11397	0.836146	-4.28122
Q13137	CALCOCO2	AR02	-0.221799	11.9176	-1.67285	0.114132	0.836146	-4.2818
Q9BVC4	MLST8	AR02	-0.539867	10.4459	-1.67063	0.114576	0.836146	-4.28336
Q92928		AR02	0.391408	11.685	1.67016	0.114671	0.836146	-4.2837
Q9NZ52	GGA3	AR02	-0.202527	14.4154	-1.66872	0.114961	0.836146	-4.28472
O75380	NDUFS6	AR02	0.314387	11.5693	1.66633	0.11544	0.836146	-4.2864
Q12912	IRAG2	AR02	-0.177263	14.229	-1.66509	0.11569	0.836146	-4.28727
Q8N4P2	IFT70B	AR02	0.565383	10.7812	1.66472	0.115766	0.836146	-4.28753
P55008	AIF1	AR02	0.295006	14.7222	1.66346	0.116021	0.836146	-4.28842
Q96BR1	SGK3	AR02	0.317663	12.1294	1.66327	0.116059	0.836146	-4.28855
Q16698	DECR1	AR02	0.229545	14.2984	1.6631	0.116093	0.836146	-4.28867
O14521	SDHD	AR02	0.336241	11.8971	1.66212	0.116292	0.836146	-4.28936
Q8N0Z3	SPICE1	AR02	0.549841	13.3219	1.66156	0.116405	0.836146	-4.28976
P19404	NDUFV2	AR02	0.150252	14.3564	1.6608	0.11656	0.836146	-4.29029
P60983	GMFB	AR02	0.448209	13.2824	1.66045	0.11663	0.836146	-4.29054
Q86YS6	RAB43	AR02	0.247057	14.0292	1.65997	0.11673	0.836146	-4.29088
Q8NFV4	ABHD11	AR02	-0.253924	10.8984	-1.65968	0.116789	0.836146	-4.29109
Q9C0J8	WDR33	AR02	-0.148613	13.2522	-1.65853	0.117022	0.836146	-4.29189
Q9Y4G8	RAPGEF2	AR02	0.198289	12.6464	1.65789	0.117153	0.836146	-4.29234
Q6N069	NAA16	AR02	0.251251	12.097	1.65733	0.117268	0.836146	-4.29274
Q14160	SCRIB	AR02	0.261231	12.418	1.65545	0.117651	0.836146	-4.29405
Q99759	MAP3K3	AR02	-0.165194	13.9169	-1.65509	0.117726	0.836146	-4.29431
O00267	SUPT5H	AR02	-0.141043	12.8945	-1.655	0.117743	0.836146	-4.29437
Q9NQW7	XPNPEP1	AR02	0.126918	14.6996	1.65465	0.117816	0.836146	-4.29462
Q9Y608	LRRFIP2	AR02	-0.335987	13.3816	-1.65362	0.118027	0.836146	-4.29534
P50552	VASP	AR02	-0.191347	17.3608	-1.65304	0.118147	0.836146	-4.29575
P31949	S100A11	AR02	0.154987	18.3728	1.65281	0.118195	0.836146	-4.29591
Q13889	GTF2H3	AR02	0.533964	8.72837	1.65274	0.118209	0.836146	-4.29596
Q92552	MRPS27	AR02	0.166794	11.4532	1.65153	0.118458	0.836146	-4.29681
Q08752	PPID	AR02	0.188583	13.6919	1.65132	0.118501	0.836146	-4.29695
Q07960	ARHGAP1	AR02	-0.17225	17.0701	-1.65056	0.118657	0.836146	-4.29748
P09651	HNRNPA1	AR02	-0.178286	17.3737	-1.64988	0.118798	0.836146	-4.29796
Q9NS28	RGS18	AR02	-0.532192	11.0787	-1.6498	0.118814	0.836146	-4.29802
Q7Z6I6	ARHGAP30	AR02	-0.202083	14.9458	-1.64864	0.119054	0.836279	-4.29883
O00567	NOP56	AR02	0.163584	13.7162	1.64823	0.11914	0.836279	-4.29912
Q9NZL9	MAT2B	AR02	-0.138305	16.3807	-1.64604	0.119593	0.838383	-4.30065
P98175	RBM10	AR02	-0.305426	13.2582	-1.64471	0.11987	0.839243	-4.30158
O15126	SCAMP1	AR02	-0.227028	13.3135	-1.64324	0.120177	0.840315	-4.30261
Q9H6Z4	RANBP3	AR02	-0.187582	12.6621	-1.64234	0.120365	0.840548	-4.30324
P30419	NMT1	AR02	-0.173322	13.9473	-1.63992	0.120872	0.841447	-4.30494
Q8N8E3	CEP112	AR02	-0.4631	13.1796	-1.63948	0.120964	0.841447	-4.30524
Q14980	NUMA1	AR02	-0.161387	15.7657	-1.63849	0.121171	0.841447	-4.30593
P29558	RBMS1	AR02	-0.250528	11.8363	-1.63588	0.121722	0.841447	-4.30776
Q8IWB9	TEX2	AR02	0.294812	12.0902	1.63538	0.121827	0.841447	-4.3081
O75390	CS	AR02	0.177937	16.8172	1.63475	0.121961	0.841447	-4.30855
Q8NDH3	NPEPL1	AR02	0.15673	13.9652	1.63459	0.121993	0.841447	-4.30865
P00747	PLG	AR02	-0.266587	12.2954	-1.63445	0.122024	0.841447	-4.30876
Q00796	SORD	AR02	0.154301	13.0187	1.63407	0.122103	0.841447	-4.30902
Q9H1K0	RBSN	AR02	0.354899	10.7115	1.63368	0.122187	0.841447	-4.30929
Q9BUP0	EFHD1	AR02	0.208125	14.7345	1.63337	0.122252	0.841447	-4.30951
Q9NUQ2	AGPAT5	AR02	0.29282	11.7731	1.63293	0.122345	0.841447	-4.30981
O75475	PSIP1	AR02	-0.197613	13.8968	-1.63221	0.122499	0.841447	-4.31032
P53007	SLC25A1	AR02	0.206779	13.4097	1.6299	0.122988	0.842527	-4.31192
Q8N137	CNTROB	AR02	0.564525	10.0076	1.62986	0.122998	0.842527	-4.31196
O15120	AGPAT2	AR02	0.203424	14.4488	1.62929	0.12312	0.842527	-4.31235
Q9NR46	SH3GLB2	AR02	-0.132505	14.0346	-1.62734	0.123534	0.843327	-4.3137
P26196	DDX6	AR02	-0.137105	16.0702	-1.62605	0.123812	0.843327	-4.31461
O75381	PEX14	AR02	0.238179	13.7723	1.62496	0.124044	0.843327	-4.31536
Q7L5Y9	MAEA	AR02	0.275147	12.2551	1.62419	0.12421	0.843327	-4.3159
Q9UJV3	MID2	AR02	0.260393	13.3954	1.62327	0.124407	0.843327	-4.31654
Q16531	DDB1	AR02	0.107776	14.6853	1.62309	0.124446	0.843327	-4.31666
O43759	SYNGR1	AR02	-0.170861	14.3448	-1.62307	0.124451	0.843327	-4.31668
Q9BUJ2	HNRNPUL1	AR02	-0.200823	15.5337	-1.61971	0.125174	0.843327	-4.31901
P34059	GALNS	AR02	0.14637	15.5686	1.61949	0.125222	0.843327	-4.31916
P18754	RCC1	AR02	0.170215	14.5773	1.61941	0.12524	0.843327	-4.31922
Q9UN86	G3BP2	AR02	-0.22631	13.2825	-1.61837	0.125464	0.843327	-4.31994
Q9NUX5	POT1	AR02	0.367701	10.5602	1.61797	0.125551	0.843327	-4.32022
Q9NRR3	CDC42SE2	AR02	-0.551076	10.0836	-1.61735	0.125685	0.843327	-4.32064
P25963	NFKBIA	AR02	-0.491685	10.1927	-1.61679	0.125807	0.843327	-4.32104
Q8NC42	RNF149	AR02	0.225244	12.9104	1.61426	0.126358	0.843327	-4.32279
Q96S59	RANBP9	AR02	0.196654	11.8592	1.61323	0.126581	0.843327	-4.3235
Q562R1	ACTBL2	AR02	-0.445769	16.5625	-1.61261	0.126718	0.843327	-4.32393
Q9UJ83	HACL1	AR02	-0.232353	11.4516	-1.6107	0.127135	0.843327	-4.32525
G9CGD6		AR02	-0.346464	12.5639	-1.60978	0.127335	0.843327	-4.32589
P52594	AGFG1	AR02	-0.278494	13.8583	-1.6087	0.127573	0.843327	-4.32664
Q14005	IL16	AR02	-0.149272	17.002	-1.60799	0.12773	0.843327	-4.32713
P09110	ACAA1	AR02	-0.141094	16.2101	-1.60751	0.127834	0.843327	-4.32746
Q9UFC0	LRWD1	AR02	0.232428	14.6368	1.60751	0.127836	0.843327	-4.32746
Q8NHP1	AKR7L	AR02	0.378875	12.5042	1.60709	0.127928	0.843327	-4.32775
Q9HAS0	C17orf75	AR02	0.415933	10.9094	1.6063	0.128102	0.843327	-4.3283
P55769	SNU13	AR02	0.292178	14.7675	1.60622	0.12812	0.843327	-4.32835
P43250	GRK6	AR02	-0.189682	14.7708	-1.60534	0.128313	0.843327	-4.32896
Q15233	NONO	AR02	-0.179228	15.2323	-1.60497	0.128396	0.843327	-4.32922
O75376	NCOR1	AR02	-0.163928	12.3412	-1.60435	0.128531	0.843327	-4.32964
P40763	STAT3	AR02	-0.145609	15.0471	-1.60047	0.129392	0.843327	-4.33232
P41250	GARS1	AR02	0.146625	15.0523	1.6	0.129497	0.843327	-4.33264
P02788	LTF	AR02	0.137564	21.8599	1.59887	0.129749	0.843327	-4.33342
Q8NEZ5	FBXO22	AR02	0.188398	12.4705	1.59807	0.129927	0.843327	-4.33397
Q0JRZ9	FCHO2	AR02	-0.216161	12.0598	-1.59629	0.130325	0.843327	-4.3352
Q3LXA3	TKFC	AR02	0.15153	15.5088	1.59609	0.130368	0.843327	-4.33533
O43172	PRPF4	AR02	-0.163168	13.8191	-1.59538	0.130527	0.843327	-4.33582
P48634	PRRC2A	AR02	-0.191029	11.8619	-1.59521	0.130566	0.843327	-4.33594
P22626	HNRNPA2B1	AR02	-0.147286	18.6632	-1.59512	0.130586	0.843327	-4.336
P50548	ERF	AR02	-0.568012	9.14039	-1.59512	0.130587	0.843327	-4.336
Q02539	H1-1	AR02	-0.464464	16.0319	-1.59444	0.130739	0.843327	-4.33647
Q8NF91	SYNE1	AR02	-0.1368	15.2173	-1.59422	0.130788	0.843327	-4.33662
Q8WVK2	SNRNP27	AR02	-0.30749	11.2655	-1.59399	0.130839	0.843327	-4.33678
P07902	GALT	AR02	-0.201408	13.471	-1.59394	0.130852	0.843327	-4.33682
Q9NRV9	HEBP1	AR02	-0.209466	13.7245	-1.59388	0.130864	0.843327	-4.33685
Q9Y2D2	SLC35A3	AR02	0.516503	10.8012	1.59349	0.130953	0.843327	-4.33713
P62312	LSM6	AR02	0.294782	14.3656	1.59295	0.131073	0.843327	-4.33749
P31930	UQCRC1	AR02	0.170085	14.5013	1.59273	0.131122	0.843327	-4.33764
Q9Y3U8	RPL36	AR02	-0.266545	15.737	-1.59194	0.1313	0.843327	-4.33819
Q9H8X2	IPPK	AR02	0.611518	18.3368	1.59148	0.131405	0.843327	-4.33851
Q9H5N1	RABEP2	AR02	0.238457	12.7798	1.59137	0.131428	0.843327	-4.33858
Q86V48	LUZP1	AR02	0.363439	11.7304	1.59001	0.131736	0.843327	-4.33952
Q5JPF3		AR02	0.624431	14.092	1.5895	0.131851	0.843327	-4.33986
Q14444	CAPRIN1	AR02	0.202529	12.967	1.58942	0.131869	0.843327	-4.33992
A8MTJ3	GNAT3	AR02	0.41344	19.0591	1.58934	0.131887	0.843327	-4.33998
Q8TAE8	GADD45GIP1	AR02	-0.273982	12.2176	-1.58818	0.132148	0.843327	-4.34077
Q92831	KAT2B	AR02	-0.303161	10.3712	-1.58574	0.132702	0.843327	-4.34244
O95251	KAT7	AR02	-0.200185	10.7377	-1.58517	0.132831	0.843327	-4.34283
P11177	PDHB	AR02	0.156619	13.5893	1.58378	0.133147	0.843327	-4.34378
P62633	CNBP	AR02	-0.266075	12.8447	-1.58375	0.133154	0.843327	-4.34381
Q9UL42	PNMA2	AR02	0.843294	12.5897	1.58334	0.133248	0.843327	-4.34409
O60573	EIF4E2	AR02	0.301473	11.365	1.58282	0.133366	0.843327	-4.34444
Q13367	AP3B2	AR02	-0.155194	13.5436	-1.58206	0.133539	0.843327	-4.34496
Q96GW9	MARS2	AR02	0.311407	16.299	1.58022	0.133962	0.843327	-4.34623
O15357	INPPL1	AR02	-0.146535	13.3908	-1.57974	0.134071	0.843327	-4.34655
Q8N1G2	CMTR1	AR02	-0.220494	12.2753	-1.57907	0.134225	0.843327	-4.34701
Q9UPT8	ZC3H4	AR02	-0.173909	11.6838	-1.57888	0.134269	0.843327	-4.34714
O14867	BACH1	AR02	-0.307571	12.2315	-1.57824	0.134416	0.843327	-4.34758
Q5TCX8	MAP3K21	AR02	0.319403	13.3146	1.57764	0.134553	0.843327	-4.34799
Q96GE9	DMAC1	AR02	0.553173	9.28682	1.57623	0.134877	0.843327	-4.34895
Q9ULR3	PPM1H	AR02	0.354202	11.0275	1.57603	0.134923	0.843327	-4.34909
Q9UDY2	TJP2	AR02	0.319835	10.0757	1.57415	0.135358	0.843327	-4.35038
Q99439	CNN2	AR02	-0.298047	18.5966	-1.57406	0.135377	0.843327	-4.35043
Q9H814	PHAX	AR02	0.479163	10.8988	1.57372	0.135457	0.843327	-4.35067
Q15120	PDK3	AR02	-0.144867	14.4622	-1.57315	0.135588	0.843327	-4.35106
P0CG22		AR02	0.325895	13.1804	1.57281	0.135667	0.843327	-4.35129
P45984	MAPK9	AR02	0.183171	12.9239	1.57272	0.135687	0.843327	-4.35135
Q13432	UNC119	AR02	-0.224487	11.8684	-1.57263	0.135708	0.843327	-4.35141
O00159	MYO1C	AR02	0.398339	13.1377	1.5715	0.135971	0.843327	-4.35218
Q5VU43	PDE4DIP	AR02	-0.264278	11.8566	-1.56986	0.136351	0.843327	-4.3533
Q5BJH7	YIF1B	AR02	-0.386644	13.2306	-1.5689	0.136574	0.843327	-4.35395
Q32NB8	PGS1	AR02	-0.262143	10.8847	-1.56843	0.136685	0.843327	-4.35428
O15372	EIF3H	AR02	-0.176895	14.144	-1.56802	0.136778	0.843327	-4.35455
O00299	CLIC1	AR02	0.133849	17.8348	1.56779	0.136833	0.843327	-4.35471
Q14232	EIF2B1	AR02	-0.249245	12.9357	-1.5668	0.137064	0.843327	-4.35538
P20742		AR02	0.398116	11.7489	1.56526	0.137424	0.843327	-4.35643
P82909	MRPS36	AR02	-0.249637	12.0351	-1.56202	0.138183	0.843327	-4.35863
Q96ST2	IWS1	AR02	0.124972	13.5976	1.56184	0.138227	0.843327	-4.35876
Q01518	CAP1	AR02	0.118527	20.1854	1.56061	0.138515	0.843327	-4.35959
A8MXV4	NUDT19	AR02	0.267788	13.3861	1.56036	0.138574	0.843327	-4.35976
Q96PU4	UHRF2	AR02	0.198224	11.6512	1.56024	0.138602	0.843327	-4.35984
Q7Z6M1	RABEPK	AR02	0.260976	11.3425	1.55905	0.138884	0.843327	-4.36066
Q14667	BLTP2	AR02	0.220927	13.0196	1.55896	0.138905	0.843327	-4.36072
Q9NRW7	VPS45	AR02	0.131495	12.2534	1.55855	0.139002	0.843327	-4.36099
Q12802	AKAP13	AR02	-0.145561	13.4699	-1.55813	0.139101	0.843327	-4.36128
Q9NZ45	CISD1	AR02	0.225534	12.4212	1.55788	0.139161	0.843327	-4.36145
Q9HB71	CACYBP	AR02	0.161281	14.7884	1.55674	0.13943	0.843327	-4.36222
Q9UPZ9	CILK1	AR02	-0.224137	12.3623	-1.5565	0.139485	0.843327	-4.36238
Q9H3H3	C11orf68	AR02	-0.148806	14.2124	-1.55569	0.139678	0.843327	-4.36293
Q5VUA4	ZNF318	AR02	-0.4772	9.62288	-1.55465	0.139925	0.843327	-4.36364
P41229	KDM5C	AR02	0.264644	12.8272	1.55443	0.139977	0.843327	-4.36379
O00519	FAAH	AR02	0.374222	11.2083	1.55393	0.140096	0.843327	-4.36412
Q9H2D6	TRIOBP	AR02	-0.191814	12.5127	-1.55325	0.140258	0.843327	-4.36459
O15270	SPTLC2	AR02	0.16881	11.916	1.55165	0.140639	0.843327	-4.36567
Q96LD8	SENP8	AR02	0.368115	10.4764	1.55129	0.140726	0.843327	-4.36592
P0DOX7		AR02	-0.291168	13.5384	-1.55053	0.140908	0.843327	-4.36643
P43403	ZAP70	AR02	-0.313438	12.3803	-1.55041	0.140935	0.843327	-4.36651
P49754	VPS41	AR02	0.169891	13.4332	1.55034	0.140952	0.843327	-4.36656
Q969V3	NCLN	AR02	-0.161929	13.7298	-1.54951	0.141151	0.843327	-4.36712
Q9BYJ9	YTHDF1	AR02	-0.239027	11.5863	-1.54834	0.14143	0.843327	-4.36791
Q15811	ITSN1	AR02	-0.234591	12.2355	-1.54826	0.14145	0.843327	-4.36796
O43292	GPAA1	AR02	-0.226946	13.3276	-1.54737	0.141663	0.843327	-4.36856
Q9H583	HEATR1	AR02	0.253718	11.55	1.54712	0.141724	0.843327	-4.36873
O95747	OXSR1	AR02	0.126453	16.489	1.54616	0.141955	0.843327	-4.36938
O75608	LYPLA1	AR02	0.193743	16.309	1.54604	0.141982	0.843327	-4.36946
Q15833	STXBP2	AR02	-0.121313	16.4823	-1.54472	0.1423	0.843327	-4.37035
O43426	SYNJ1	AR02	-0.126928	13.4631	-1.54392	0.142495	0.843327	-4.3709
P60903	S100A10	AR02	-0.329884	12.3239	-1.54347	0.142604	0.843327	-4.3712
Q5TFE4	NT5DC1	AR02	-0.238009	12.2092	-1.54253	0.14283	0.843327	-4.37183
O60869	EDF1	AR02	-0.370887	15.0943	-1.54185	0.142993	0.843327	-4.37229
Q96JA1	LRIG1	AR02	0.301939	12.8057	1.54049	0.143323	0.843327	-4.37321
O95159	ZFPL1	AR02	0.18918	12.7703	1.53767	0.144008	0.843327	-4.37511
P39748	FEN1	AR02	-0.145847	16.0148	-1.5373	0.144099	0.843327	-4.37536
P43897	TSFM	AR02	0.14188	13.0601	1.53694	0.144186	0.843327	-4.3756
Q9BX10	GTPBP2	AR02	0.152179	12.0657	1.53542	0.144557	0.843327	-4.37662
Q96AZ6	ISG20	AR02	-0.20019	13.844	-1.53495	0.144672	0.843327	-4.37694
Q8N960	CEP120	AR02	0.298926	10.9304	1.53347	0.145034	0.843327	-4.37793
Q96CN9	GCC1	AR02	0.334026	12.5809	1.5326	0.145246	0.843327	-4.37852
Q04760	GLO1	AR02	0.18516	15.4329	1.53123	0.145584	0.843327	-4.37944
Q8IXH7	NELFCD	AR02	0.165964	12.0549	1.53122	0.145585	0.843327	-4.37944
Q9NW68	BSDC1	AR02	0.198609	11.6198	1.53097	0.145648	0.843327	-4.37962
Q9UKD2	MRTO4	AR02	-0.265219	14.7438	-1.5308	0.145688	0.843327	-4.37973
A3KMH1	VWA8	AR02	0.241581	10.7853	1.52975	0.145947	0.843327	-4.38043
P35030	PRSS3	AR02	-0.234041	12.7971	-1.52925	0.14607	0.843327	-4.38077
Q08211	DHX9	AR02	-0.122046	17.8641	-1.52771	0.146449	0.843327	-4.3818
Q8IXS8	HYCC2	AR02	-0.415823	9.28369	-1.52693	0.146642	0.843327	-4.38232
Q8IWZ8	SUGP1	AR02	-0.25644	11.9997	-1.52657	0.146733	0.843327	-4.38257
Q9UHD1	CHORDC1	AR02	-0.14867	13.1056	-1.52561	0.146969	0.843327	-4.38321
O95777	LSM8	AR02	-0.439679	11.5065	-1.52553	0.146988	0.843327	-4.38326
P49419	ALDH7A1	AR02	0.313398	11.7705	1.52524	0.14706	0.843327	-4.38346
P69905	HBA1	AR02	0.284882	20.9344	1.52516	0.147081	0.843327	-4.38351
O43566	RGS14	AR02	-0.136072	15.091	-1.52466	0.147203	0.843327	-4.38384
Q8NDX5	PHC3	AR02	-0.395731	9.3485	-1.52418	0.147324	0.843327	-4.38417
Q9H7B2	RPF2	AR02	0.318703	9.86452	1.52332	0.147537	0.843327	-4.38474
Q9NZ09	UBAP1	AR02	-0.247031	12.8548	-1.52307	0.147598	0.843327	-4.38491
Q6P2P2	PRMT9	AR02	-0.301813	10.1706	-1.52295	0.14763	0.843327	-4.38499
Q9Y2L5	TRAPPC8	AR02	-0.107784	14.8109	-1.52274	0.14768	0.843327	-4.38513
Q96RE7	NACC1	AR02	0.275692	13.3855	1.52137	0.148021	0.843327	-4.38605
Q99549	MPHOSPH8	AR02	0.228087	12.6013	1.52018	0.148319	0.843327	-4.38685
Q9P2D3	HEATR5B	AR02	-0.143393	14.8197	-1.51985	0.148401	0.843327	-4.38707
Q92804	TAF15	AR02	-0.191818	15.0842	-1.51965	0.148452	0.843327	-4.3872
Q9BQD3	KXD1	AR02	0.169184	12.91	1.51948	0.148495	0.843327	-4.38732
Q96EK6	GNPNAT1	AR02	0.195082	11.6955	1.51894	0.148628	0.843327	-4.38767
O60907	TBL1X	AR02	0.467226	10.1936	1.51849	0.148742	0.843327	-4.38798
Q9H939	PSTPIP2	AR02	-0.18289	14.3508	-1.51752	0.148984	0.843327	-4.38862
P78417	GSTO1	AR02	0.134344	18.9762	1.51748	0.148994	0.843327	-4.38865
Q69YN2	CWF19L1	AR02	-0.118599	13.5883	-1.51663	0.149206	0.843327	-4.38921
Q5T447	HECTD3	AR02	-0.162392	12.4201	-1.51575	0.149428	0.843327	-4.38981
Q9H2C0	GAN	AR02	-0.329135	13.2455	-1.51536	0.149526	0.843327	-4.39007
Q9H3U1	UNC45A	AR02	0.134559	14.0983	1.5153	0.149541	0.843327	-4.39011
Q9BRT6	LLPH	AR02	-0.607074	10.6028	-1.51517	0.149572	0.843327	-4.39019
Q14155	ARHGEF7	AR02	0.130861	12.9234	1.51512	0.149584	0.843327	-4.39022
Q9NVN8	GNL3L	AR02	-0.334176	10.2537	-1.51472	0.149685	0.843327	-4.39049
Q8WVV9	HNRNPLL	AR02	-0.167065	13.0867	-1.51356	0.149979	0.843327	-4.39127
P61604	HSPE1	AR02	0.130142	17.3137	1.51172	0.150443	0.843327	-4.39249
C4AMC7		AR02	-0.214565	13.5051	-1.51054	0.150741	0.843327	-4.39328
Q8N1F8	STK11IP	AR02	0.168807	12.519	1.51028	0.150805	0.843327	-4.39345
Q9UBL3	ASH2L	AR02	0.156399	13.6102	1.51023	0.150819	0.843327	-4.39348
P48443	RXRG	AR02	-0.328207	11.2896	-1.51013	0.150843	0.843327	-4.39355
Q9UHJ6	SHPK	AR02	-0.143942	12.6385	-1.50994	0.150892	0.843327	-4.39368
P04181	OAT	AR02	-0.146068	16.623	-1.50829	0.151311	0.843327	-4.39478
Q9H910	JPT2	AR02	-0.222969	11.4594	-1.50632	0.15181	0.843327	-4.39608
Q8IZP0	ABI1	AR02	-0.199159	13.9008	-1.50611	0.151865	0.843327	-4.39623
P13804	ETFA	AR02	0.105683	15.0457	1.50601	0.151891	0.843327	-4.3963
Q7L590	MCM10	AR02	-0.204457	15.5514	-1.50598	0.151896	0.843327	-4.39631
Q6GMV3	PTRHD1	AR02	-0.261424	13.0783	-1.50589	0.151919	0.843327	-4.39637
P05387	RPLP2	AR02	0.119992	16.503	1.50552	0.152014	0.843327	-4.39662
Q9H992	MARCHF7	AR02	0.422722	12.5841	1.50529	0.152072	0.843327	-4.39677
O00161	SNAP23	AR02	-0.253599	14.4503	-1.50479	0.1522	0.843327	-4.3971
Q9Y3E7	CHMP3	AR02	-0.249539	14.6692	-1.50411	0.152374	0.843327	-4.39756
Q02086	SP2	AR02	-0.27009	11.9388	-1.50298	0.152663	0.843327	-4.39831
O94925	GLS	AR02	0.187826	12.6558	1.50287	0.15269	0.843327	-4.39838
Q96LC7	SIGLEC10	AR02	-0.223417	11.2191	-1.50264	0.15275	0.843327	-4.39853
Q9Y3A5	SBDS	AR02	0.292745	12.4512	1.50236	0.15282	0.843327	-4.39872
Q9H0R1	AP5M1	AR02	0.2115	11.4352	1.50195	0.152926	0.843327	-4.39899
Q86WQ0	NR2C2AP	AR02	0.476219	10.0373	1.50122	0.153112	0.843327	-4.39947
P52790	HK3	AR02	0.481567	12.1177	1.50057	0.15328	0.843327	-4.39991
Q9NWT1	PAK1IP1	AR02	-0.2175	11.8253	-1.50039	0.153327	0.843327	-4.40003
P23497	SP100	AR02	0.278065	15.9686	1.49974	0.153492	0.843327	-4.40045
Q9Y371	SH3GLB1	AR02	-0.185217	14.1359	-1.49973	0.153495	0.843327	-4.40046
O75348	ATP6V1G1	AR02	0.133532	16.6021	1.4986	0.153786	0.843327	-4.40121
Q86X52	CHSY1	AR02	0.19357	11.6615	1.49826	0.153872	0.843327	-4.40143
Q9NPI6	DCP1A	AR02	0.36505	10.2279	1.49793	0.153957	0.843327	-4.40165
P61020	RAB5B	AR02	0.118131	15.2119	1.49776	0.154002	0.843327	-4.40177
P36507	MAP2K2	AR02	0.164698	14.8668	1.49656	0.15431	0.843327	-4.40256
Q5JU69	TOR2A	AR02	0.21421	12.9054	1.49634	0.154368	0.843327	-4.40271
Q9NRW4	DUSP22	AR02	0.490234	10.2115	1.49543	0.154601	0.843327	-4.40331
Q86X55	CARM1	AR02	0.326133	12.9744	1.49517	0.154668	0.843327	-4.40348
O43805	SSNA1	AR02	0.319172	10.3502	1.49516	0.154672	0.843327	-4.40349
Q70CQ2	USP34	AR02	1.18657	11.42	1.49414	0.154936	0.843327	-4.40417
Q9UBB9	TFIP11	AR02	-0.142922	11.594	-1.49368	0.155054	0.843327	-4.40447
Q13363	CTBP1	AR02	0.121681	15.2939	1.49358	0.155081	0.843327	-4.40454
Q86XE0	SNX32	AR02	-0.497928	9.62094	-1.49282	0.155276	0.843327	-4.40503
P26378	ELAVL4	AR02	0.514327	13.7307	1.49275	0.155296	0.843327	-4.40508
O95819	MAP4K4	AR02	-0.216388	13.122	-1.49041	0.155904	0.843327	-4.40663
P50213	IDH3A	AR02	-0.111751	13.0113	-1.49015	0.155972	0.843327	-4.4068
O75369	FLNB	AR02	0.105796	13.367	1.49003	0.156002	0.843327	-4.40688
P60510	PPP4C	AR02	-0.151668	12.8661	-1.48991	0.156033	0.843327	-4.40696
P0DN79	CBS	AR02	0.479175	13.4624	1.48981	0.156061	0.843327	-4.40703
Q08043	ACTN3	AR02	0.128922	17.8678	1.48924	0.156208	0.843327	-4.4074
Q5T280	SPOUT1	AR02	-0.298072	11.8958	-1.48834	0.156441	0.843327	-4.40799
P61923	COPZ1	AR02	-0.355858	13.4136	-1.48727	0.156721	0.843327	-4.4087
Q16836	HADH	AR02	0.166955	13.9633	1.48642	0.156943	0.843327	-4.40926
O15550	KDM6A	AR02	0.413867	11.9141	1.48511	0.157287	0.843327	-4.41013
Q15700	DLG2	AR02	-0.463236	10.9044	-1.48491	0.15734	0.843327	-4.41026
O14579	COPE	AR02	-0.227248	13.5199	-1.48489	0.157344	0.843327	-4.41027
Q9NX14	NDUFB11	AR02	-0.380867	10.9139	-1.48487	0.15735	0.843327	-4.41028
P78314	SH3BP2	AR02	-0.232627	12.3233	-1.48453	0.157439	0.843327	-4.41051
Q9HCG8	CWC22	AR02	-0.217038	12.3968	-1.48442	0.157468	0.843327	-4.41058
Q5T1R4	HIVEP3	AR02	1.06496	14.7839	1.48409	0.157554	0.843327	-4.4108
Q6ZVM7	TOM1L2	AR02	-0.193884	12.5977	-1.48349	0.157712	0.843327	-4.41119
Q96J42	TXNDC15	AR02	-0.503657	9.70953	-1.4834	0.157737	0.843327	-4.41126
Q13393	PLD1	AR02	-0.165244	13.9226	-1.48177	0.158164	0.843327	-4.41233
O95674	CDS2	AR02	-0.278166	13.2515	-1.48156	0.15822	0.843327	-4.41247
Q8N999	C12orf29	AR02	0.25401	12.6555	1.48009	0.158607	0.843327	-4.41343
P04424	ASL	AR02	0.121245	14.2716	1.47956	0.158747	0.843327	-4.41378
Q9ULL0	KIAA1210	AR02	-0.400857	11.9978	-1.47931	0.158813	0.843327	-4.41394
Q9UPA5	BSN	AR02	0.18459	13.7689	1.478	0.159158	0.843327	-4.4148
Q9UI10	EIF2B4	AR02	-0.165915	12.1036	-1.47799	0.159162	0.843327	-4.41481
Q9HBI0	PARVG	AR02	0.181707	15.1642	1.47781	0.15921	0.843327	-4.41493
Q9H944	MED20	AR02	0.278065	11.2084	1.47754	0.159281	0.843327	-4.41511
A3KN83	SBNO1	AR02	-0.153034	12.039	-1.47667	0.159511	0.843327	-4.41568
Q96J02	ITCH	AR02	-0.156412	12.0118	-1.47646	0.159568	0.843327	-4.41582
Q9UGI8	TES	AR02	-0.150867	14.9911	-1.47626	0.15962	0.843327	-4.41595
Q8IY18	SMC5	AR02	0.185274	11.2082	1.47618	0.15964	0.843327	-4.416
Q14318	FKBP8	AR02	-0.186018	14.2011	-1.47577	0.15975	0.843327	-4.41627
Q8NBQ5	HSD17B11	AR02	0.129359	17.0319	1.47442	0.160108	0.843327	-4.41715
Q9NPI1	BRD7	AR02	-0.232777	11.1129	-1.47393	0.160238	0.843327	-4.41748
P42126	ECI1	AR02	0.141133	14.1951	1.47366	0.160312	0.843327	-4.41766
O43396	TXNL1	AR02	0.187965	14.6898	1.47332	0.160401	0.843327	-4.41788
Q9NUB1	ACSS1	AR02	-0.107248	14.6861	-1.47294	0.160503	0.843327	-4.41813
P02042	HBD	AR02	0.26208	20.7467	1.47229	0.160676	0.843327	-4.41855
Q96PE7	MCEE	AR02	0.236866	12.4737	1.4722	0.160701	0.843327	-4.41861
P14859	POU2F1	AR02	-0.212168	11.8399	-1.47125	0.160954	0.843327	-4.41924
Q8TDM6	DLG5	AR02	-0.393648	12.8486	-1.47121	0.160965	0.843327	-4.41926
Q9P0R6	GSKIP	AR02	0.195719	12.6698	1.4686	0.161662	0.845558	-4.42097
P62805	H4C9	AR02	-0.19008	21.1477	-1.46846	0.161701	0.845558	-4.42106
Q12846	STX4	AR02	-0.229818	13.7998	-1.46264	0.163266	0.852795	-4.42487
P42166	TMPO	AR02	-0.142088	14.413	-1.46167	0.163529	0.852795	-4.4255
Q00341	HDLBP	AR02	-0.202615	12.4633	-1.46158	0.163554	0.852795	-4.42556
O95861	BPNT1	AR02	-0.125952	13.8776	-1.46056	0.163831	0.85289	-4.42623
P02751	FN1	AR02	0.430111	11.5021	1.45879	0.16431	0.85289	-4.42738
Q9Y256	RCE1	AR02	-0.241142	10.9064	-1.45865	0.164349	0.85289	-4.42747
Q9BTU6	PI4K2A	AR02	0.217463	12.2016	1.45855	0.164376	0.85289	-4.42754
Q9Y3T6	R3HCC1	AR02	0.201124	12.4394	1.45812	0.164493	0.85289	-4.42782
Q05193	DNM1	AR02	0.124338	16.7122	1.45805	0.16451	0.85289	-4.42786
Q15058	KIF14	AR02	-0.464435	12.1969	-1.45713	0.164761	0.853378	-4.42846
Q9NR80	ARHGEF4	AR02	0.299787	10.6295	1.45532	0.165254	0.854358	-4.42964
P43243	MATR3	AR02	-0.120578	16.0432	-1.45446	0.165492	0.854358	-4.4302
O00422	SAP18	AR02	0.294812	14.449	1.45389	0.165646	0.854358	-4.43057
Q92620	DHX38	AR02	0.174405	12.1911	1.45279	0.165948	0.854358	-4.43128
P21283	ATP6V1C1	AR02	0.137838	14.8172	1.45267	0.16598	0.854358	-4.43136
Q9UMY4	SNX12	AR02	0.138995	14.2832	1.45245	0.166039	0.854358	-4.4315
Q9HC38	GLOD4	AR02	0.124916	14.748	1.45191	0.166188	0.854358	-4.43185
P24557	TBXAS1	AR02	0.145349	14.3819	1.45186	0.166203	0.854358	-4.43189
Q16181	SEPTIN7	AR02	-0.237353	14.7046	-1.45009	0.166689	0.85489	-4.43304
P30049	ATP5F1D	AR02	0.172826	14.2076	1.44927	0.166914	0.85489	-4.43357
P62937	PPIA	AR02	0.169286	18.5002	1.44927	0.166915	0.85489	-4.43357
Q8NHG8	ZNRF2	AR02	-0.354624	11.7053	-1.44832	0.167175	0.85489	-4.43418
Q4G0N4	NADK2	AR02	-0.151178	13.8482	-1.44602	0.16781	0.85489	-4.43568
Q9BV20	MRI1	AR02	0.14166	13.0776	1.44546	0.167965	0.85489	-4.43604
P61313	RPL15	AR02	-0.27413	14.2519	-1.44502	0.168087	0.85489	-4.43633
P35754	GLRX	AR02	-0.17391	19.2639	-1.44484	0.168137	0.85489	-4.43644
Q9NTG7	SIRT3	AR02	0.229401	11.498	1.44417	0.168323	0.85489	-4.43688
Q9UNI6	DUSP12	AR02	0.426362	10.6177	1.44384	0.168414	0.85489	-4.43709
Q9Y223	GNE	AR02	-0.231746	11.6596	-1.44338	0.168542	0.85489	-4.43739
O43818	RRP9	AR02	-0.246915	11.7174	-1.44294	0.168663	0.85489	-4.43767
Q9UHA4	LAMTOR3	AR02	0.265164	14.1225	1.44243	0.168805	0.85489	-4.438
P54108	CRISP3	AR02	-0.642953	11.6728	-1.44113	0.169166	0.85489	-4.43884
Q9UJY5	GGA1	AR02	-0.121811	13.4342	-1.44107	0.169183	0.85489	-4.43888
P49815	TSC2	AR02	-0.189315	11.4135	-1.44045	0.169355	0.85489	-4.43928
Q9NXR1	NDE1	AR02	-0.288017	13.4559	-1.44017	0.169434	0.85489	-4.43946
Q08426	EHHADH	AR02	-0.201499	13.4451	-1.44013	0.169446	0.85489	-4.43949
Q9HCP0	CSNK1G1	AR02	0.177601	13.0206	1.43999	0.169485	0.85489	-4.43958
Q9UKY7	CDV3	AR02	-0.248391	15.5463	-1.43955	0.169606	0.85489	-4.43986
Q5W0V3	FHIP2A	AR02	0.116993	16.5242	1.43854	0.169888	0.85489	-4.44051
Q96AE4	FUBP1	AR02	-0.106479	15.6994	-1.43849	0.169902	0.85489	-4.44055
Q12950	FOXD4	AR02	-0.40199	10.824	-1.43846	0.169912	0.85489	-4.44057
Q9NVI7	ATAD3A	AR02	-0.207699	12.2738	-1.43695	0.170332	0.855975	-4.44154
Q8WUW1	BRK1	AR02	0.217617	14.5103	1.43614	0.170561	0.855975	-4.44207
P33897	ABCD1	AR02	-0.309173	11.2898	-1.43577	0.170664	0.855975	-4.4423
Q00537	CDK17	AR02	0.202793	11.4855	1.43544	0.170755	0.855975	-4.44252
O94817	ATG12	AR02	0.245274	11.8252	1.43403	0.171153	0.857181	-4.44343
O14979	HNRNPDL	AR02	-0.150403	16.6944	-1.43285	0.171484	0.857624	-4.44419
Q7L1T6	CYB5R4	AR02	0.163707	13.1604	1.4325	0.171583	0.857624	-4.44441
Q9P0M6	MACROH2A2	AR02	-0.23879	14.0975	-1.43051	0.172142	0.857624	-4.44569
Q9UNQ2	DIMT1	AR02	0.407208	10.8545	1.43025	0.172217	0.857624	-4.44586
Q9BRA2	TXNDC17	AR02	0.209876	15.8577	1.42962	0.172396	0.857624	-4.44627
Q9Y2H0	DLGAP4	AR02	-0.38601	11.3754	-1.4291	0.172542	0.857624	-4.4466
Q16204	CCDC6	AR02	0.280386	12.6761	1.42794	0.172869	0.857624	-4.44734
P61019	RAB2A	AR02	-0.21238	15.2198	-1.42784	0.1729	0.857624	-4.44741
Q12913	PTPRJ	AR02	0.121764	15.5047	1.42685	0.173178	0.857624	-4.44805
Q9HBH0	RHOF	AR02	0.149372	13.5491	1.42675	0.173208	0.857624	-4.44811
Q99795	GPA33	AR02	-0.284279	14.3417	-1.42645	0.173293	0.857624	-4.4483
O14639	ABLIM1	AR02	0.283481	11.5142	1.42643	0.173298	0.857624	-4.44832
Q96A26	FAM162A	AR02	-0.351877	12.3151	-1.42563	0.173526	0.857624	-4.44883
Q92503	SEC14L1	AR02	0.307125	10.3522	1.42524	0.173636	0.857624	-4.44908
A2RUS2	DENND3	AR02	-0.122352	13.4203	-1.42414	0.17395	0.857624	-4.44979
O43432	EIF4G3	AR02	0.139313	12.3855	1.42408	0.173967	0.857624	-4.44983
Q92995	USP13	AR02	-0.311832	10.5866	-1.42338	0.174166	0.857624	-4.45027
O14683	TP53I11	AR02	-0.176187	17.0416	-1.4232	0.174218	0.857624	-4.45039
P25788	PSMA3	AR02	0.203565	15.4567	1.4222	0.174504	0.857624	-4.45103
Q9UBS8	RNF14	AR02	0.272289	11.4497	1.42199	0.174563	0.857624	-4.45117
P54727	RAD23B	AR02	0.101322	15.4816	1.42156	0.174686	0.857624	-4.45144
Q8TBQ9	TMEM167A	AR02	0.197738	13.6062	1.42151	0.174701	0.857624	-4.45148
P16104	H2AX	AR02	0.163149	22.3467	1.42088	0.17488	0.857732	-4.45188
Q9H8S9	MOB1A	AR02	-0.29672	15.7115	-1.41951	0.175273	0.858018	-4.45276
P43251	BTD	AR02	0.268655	11.8168	1.4188	0.175476	0.858018	-4.45321
Q9UKX7	NUP50	AR02	-0.133194	14.8378	-1.41858	0.17554	0.858018	-4.45335
Q06830	PRDX1	AR02	0.106485	15.9833	1.41848	0.175568	0.858018	-4.45342
O95989	NUDT3	AR02	-0.163179	13.8438	-1.41779	0.175765	0.858213	-4.45386
Q16611	BAK1	AR02	0.286898	12.9082	1.41695	0.176006	0.858433	-4.45439
O76021	RSL1D1	AR02	-0.283933	11.4893	-1.41632	0.176189	0.858433	-4.4548
O00203	AP3B1	AR02	-0.143624	14.5244	-1.41599	0.176283	0.858433	-4.45501
O15525	MAFG	AR02	-0.185098	12.8216	-1.41514	0.176527	0.858856	-4.45555
Q6UWP2	DHRS11	AR02	-0.326817	10.882	-1.41413	0.176819	0.859512	-4.4562
Q96RS6	NUDCD1	AR02	0.161908	12.0047	1.41163	0.177543	0.86226	-4.45779
Q9H2H8	PPIL3	AR02	0.16518	12.9677	1.41056	0.177851	0.862643	-4.45847
Q86YV0	RASAL3	AR02	-0.130652	15.304	-1.41019	0.17796	0.862643	-4.45871
Q9NVS9	PNPO	AR02	0.168448	13.3703	1.40898	0.178312	0.862643	-4.45948
O75648	TRMU	AR02	-0.59885	11.1467	-1.40866	0.178403	0.862643	-4.45968
Q9BVA0	KATNB1	AR02	0.300879	10.6394	1.40863	0.178412	0.862643	-4.4597
O60884	DNAJA2	AR02	-0.118431	13.6733	-1.40552	0.179318	0.865233	-4.46168
P30533	LRPAP1	AR02	-0.332806	11.6027	-1.40477	0.179538	0.865233	-4.46216
Q9UKR5	ERG28	AR02	0.238569	12.7434	1.40444	0.179634	0.865233	-4.46237
P49207	RPL34	AR02	0.445503	14.2648	1.40269	0.180145	0.865233	-4.46348
O14880	MGST3	AR02	-0.217922	13.5329	-1.40244	0.18022	0.865233	-4.46364
Q9NTK5	OLA1	AR02	-0.0974994	15.523	-1.40235	0.180245	0.865233	-4.4637
Q8IYM9	TRIM22	AR02	-0.304943	11.7962	-1.40153	0.180487	0.865233	-4.46422
P31689	DNAJA1	AR02	-0.221851	14.0993	-1.40045	0.180803	0.865233	-4.4649
O43747	AP1G1	AR02	0.0979044	16.0872	1.40035	0.180832	0.865233	-4.46497
Q8IZE3	SCYL3	AR02	0.373821	10.4449	1.39983	0.180984	0.865233	-4.4653
Q96KR1	ZFR	AR02	-0.141825	12.6293	-1.39925	0.181155	0.865233	-4.46566
P52272	HNRNPM	AR02	-0.121801	17.4921	-1.39883	0.181279	0.865233	-4.46593
P08195	SLC3A2	AR02	0.114198	12.8146	1.39804	0.181513	0.865233	-4.46643
Q6ZNJ1	NBEAL2	AR02	-0.136044	14.708	-1.39741	0.181698	0.865233	-4.46683
P20674	COX5A	AR02	0.171604	15.6085	1.39702	0.181814	0.865233	-4.46708
O15504	NUP42	AR02	-0.305538	10.835	-1.39624	0.182043	0.865233	-4.46757
P12955	PEPD	AR02	-0.238775	12.2131	-1.39622	0.182051	0.865233	-4.46759
P07099	EPHX1	AR02	0.247513	14.1975	1.39597	0.182124	0.865233	-4.46775
Q9P258	RCC2	AR02	-0.115307	15.3109	-1.39522	0.182347	0.865233	-4.46822
P04792	HSPB1	AR02	0.250772	12.8455	1.39442	0.182583	0.865233	-4.46873
O43684	BUB3	AR02	-0.121575	15.1262	-1.39326	0.182927	0.865233	-4.46946
O00189	AP4M1	AR02	-0.252593	11.8731	-1.39321	0.18294	0.865233	-4.46949
P12236	SLC25A6	AR02	0.186624	14.0735	1.39286	0.183046	0.865233	-4.46972
Q92844	TANK	AR02	-0.203707	12.9303	-1.39276	0.183075	0.865233	-4.46978
P14923	JUP	AR02	-0.362073	13.6586	-1.39229	0.183214	0.865233	-4.47007
Q6NXT6	TAPT1	AR02	-0.171704	12.8678	-1.39105	0.183584	0.865233	-4.47086
Q15404	RSU1	AR02	0.123358	16.2488	1.39026	0.183818	0.865233	-4.47136
O43286	B4GALT5	AR02	0.195446	13.6327	1.39024	0.183826	0.865233	-4.47137
Q9H6Q3	SLA2	AR02	-0.278567	9.79856	-1.39004	0.183882	0.865233	-4.47149
P30044	PRDX5	AR02	0.13885	20.0691	1.38984	0.183943	0.865233	-4.47162
Q9UNM6	PSMD13	AR02	0.11671	15.3278	1.38779	0.184556	0.865233	-4.47292
P08514	ITGA2B	AR02	0.266437	14.3325	1.38748	0.184649	0.865233	-4.47311
P35268	RPL22	AR02	-0.345159	14.9973	-1.38728	0.184708	0.865233	-4.47324
P19784	CSNK2A2	AR02	0.194538	13.2198	1.38724	0.184721	0.865233	-4.47327
Q16637	SMN1	AR02	-0.442457	11.4873	-1.38655	0.184927	0.865233	-4.4737
Q07955	SRSF1	AR02	-0.173786	16.5294	-1.38607	0.185068	0.865233	-4.474
Q53H82	LACTB2	AR02	-0.153482	13.645	-1.38515	0.185346	0.865233	-4.47458
P22681	CBL	AR02	-0.164635	15.5727	-1.3851	0.185361	0.865233	-4.47461
E9PRG8		AR02	-0.462813	12.8286	-1.3847	0.185481	0.865233	-4.47487
Q9H8T0	AKTIP	AR02	0.150134	12.1386	1.38468	0.185485	0.865233	-4.47487
P26640	VARS1	AR02	-0.117142	14.9858	-1.38287	0.18603	0.865233	-4.47602
Q2TB90	HKDC1	AR02	0.550772	15.1143	1.38275	0.186067	0.865233	-4.47609
P47974	ZFP36L2	AR02	-0.23049	11.8422	-1.38195	0.186306	0.865233	-4.47659
Q96AX2	RAB37	AR02	-0.189136	13.1942	-1.38169	0.186387	0.865233	-4.47676
Q96JM3	CHAMP1	AR02	0.171396	11.843	1.38128	0.186508	0.865233	-4.47701
P52564	MAP2K6	AR02	0.146506	13.3064	1.38086	0.186637	0.865233	-4.47728
Q15542	TAF5	AR02	0.446475	11.4252	1.38056	0.186726	0.865233	-4.47747
Q9BXJ9	NAA15	AR02	0.13345	13.9969	1.38024	0.186821	0.865233	-4.47767
P61981	YWHAG	AR02	0.21892	15.3363	1.37886	0.187241	0.865233	-4.47854
Q9BZL1	UBL5	AR02	-0.345882	12.712	-1.37864	0.187305	0.865233	-4.47867
Q13045	FLII	AR02	-0.117292	15.8883	-1.37749	0.187654	0.865233	-4.4794
Q9UHY7	ENOPH1	AR02	-0.173935	14.9921	-1.37733	0.187702	0.865233	-4.4795
Q8WZ42	TTN	AR02	-0.275436	13.9705	-1.37699	0.187806	0.865233	-4.47971
O60942	RNGTT	AR02	-0.326421	10.2013	-1.37618	0.18805	0.865233	-4.48022
P09429	HMGB1	AR02	-0.504777	17.6844	-1.37544	0.188275	0.865233	-4.48068
Q5T1M5	FKBP15	AR02	-0.153319	14.0223	-1.37526	0.188329	0.865233	-4.48079
Q96N67	DOCK7	AR02	0.337282	13.3914	1.37485	0.188456	0.865233	-4.48106
Q13164	MAPK7	AR02	0.142108	14.5471	1.37437	0.1886	0.865233	-4.48135
Q9Y3D6	FIS1	AR02	0.188647	13.7011	1.3743	0.188623	0.865233	-4.4814
Q92597	NDRG1	AR02	-0.20827	11.6916	-1.3741	0.188682	0.865233	-4.48152
Q9NTI2	ATP8A2	AR02	-0.173673	13.2809	-1.37402	0.188706	0.865233	-4.48157
Q96AQ6	PBXIP1	AR02	-0.22121	13.3334	-1.37377	0.188784	0.865233	-4.48173
Q9NXN4	GDAP2	AR02	-0.10965	13.8287	-1.37252	0.189166	0.866255	-4.48252
P60660	MYL6	AR02	0.116534	19.2201	1.37145	0.189491	0.866694	-4.48318
P78364	PHC1	AR02	-0.434258	11.2948	-1.37092	0.189652	0.866694	-4.48351
Q9C005	DPY30	AR02	-0.138056	14.2652	-1.36976	0.190009	0.866694	-4.48424
Q68DY1	ZNF626	AR02	-0.268327	13.3813	-1.36903	0.19023	0.866694	-4.48469
Q13571	LAPTM5	AR02	-0.391493	12.2896	-1.36815	0.190499	0.866694	-4.48524
Q6JQN1	ACAD10	AR02	0.227437	11.6273	1.36809	0.19052	0.866694	-4.48529
Q92604	LPGAT1	AR02	0.167421	14.2381	1.36758	0.190676	0.866694	-4.4856
Q9GZQ3	COMMD5	AR02	-0.198021	14.008	-1.36755	0.190685	0.866694	-4.48562
Q8NHS4	CLHC1	AR02	-0.273028	14.6816	-1.36753	0.190692	0.866694	-4.48564
Q13733	ATP1A4	AR02	-0.185571	14.7117	-1.36652	0.191002	0.867382	-4.48627
P84095	RHOG	AR02	-0.163249	17.329	-1.36478	0.191535	0.867852	-4.48735
Q8IZP2		AR02	-0.189373	15.3959	-1.36428	0.191689	0.867852	-4.48766
Q9GZY8	MFF	AR02	-0.30018	11.9316	-1.36409	0.191749	0.867852	-4.48778
P62857	RPS28	AR02	-0.248473	12.3126	-1.36379	0.19184	0.867852	-4.48797
Q9UBB5	MBD2	AR02	-0.381807	12.4933	-1.36359	0.191901	0.867852	-4.48809
Q86VN1	VPS36	AR02	0.112913	13.8468	1.36259	0.192212	0.868536	-4.48872
Q96EP5	DAZAP1	AR02	-0.27665	14.0837	-1.36121	0.192637	0.86918	-4.48957
Q7Z7L7	ZER1	AR02	0.123715	14.6584	1.3611	0.192673	0.86918	-4.48965
Q9Y6D9	MAD1L1	AR02	-0.151124	12.8757	-1.35983	0.193065	0.869225	-4.49043
Q9Y2X9	ZNF281	AR02	-0.408978	10.5802	-1.35905	0.193308	0.869225	-4.49092
Q5M7Z0	RNFT1	AR02	0.359154	10.8879	1.35867	0.193425	0.869225	-4.49116
Q9H0W8	SMG9	AR02	0.219042	11.9597	1.35867	0.193425	0.869225	-4.49116
Q8IVW4	CDKL3	AR02	0.483774	13.0506	1.35838	0.193516	0.869225	-4.49134
Q6WKZ4	RAB11FIP1	AR02	-0.133002	15.9536	-1.35798	0.193639	0.869225	-4.49159
P10515	DLAT	AR02	0.108735	13.8452	1.35599	0.194258	0.871287	-4.49282
Q15436	SEC23A	AR02	-0.138372	14.6071	-1.35546	0.194422	0.871307	-4.49315
P16278	GLB1	AR02	0.10494	14.3155	1.35454	0.194711	0.871517	-4.49372
Q96SK2	TMEM209	AR02	0.337073	11.939	1.35429	0.194789	0.871517	-4.49388
Q86Y39	NDUFA11	AR02	0.137279	14.2843	1.35277	0.195263	0.87269	-4.49482
P42704	LRPPRC	AR02	0.122904	13.1154	1.35013	0.19609	0.87269	-4.49645
Q9UHQ4	BCAP29	AR02	0.453303	11.0453	1.34952	0.196281	0.87269	-4.49683
Q14166	TTLL12	AR02	-0.146501	15.3201	-1.34946	0.1963	0.87269	-4.49687
Q96CT7	CCDC124	AR02	-0.385847	11.7756	-1.34895	0.196461	0.87269	-4.49719
Q8N108	MIER1	AR02	0.541938	12.6442	1.34867	0.196548	0.87269	-4.49736
Q7L5N7	LPCAT2	AR02	0.137439	16.4232	1.34761	0.196884	0.87269	-4.49802
P05546	SERPIND1	AR02	-0.358036	11.6559	-1.34745	0.196933	0.87269	-4.49811
Q99996	AKAP9	AR02	0.269556	12.8674	1.34679	0.19714	0.87269	-4.49852
Q5I7T1	ALG10B	AR02	0.251657	10.5333	1.34606	0.197372	0.87269	-4.49898
Q9P0I2	EMC3	AR02	-0.151588	13.4321	-1.34576	0.197466	0.87269	-4.49916
P84077	ARF1	AR02	0.324938	15.2752	1.34532	0.197603	0.87269	-4.49943
O14672	ADAM10	AR02	0.130774	14.9574	1.34439	0.197898	0.87269	-4.5
P00568	AK1	AR02	0.275045	12.5883	1.34422	0.197954	0.87269	-4.50011
Q03518	TAP1	AR02	-0.155901	14.5341	-1.34419	0.19796	0.87269	-4.50013
P49189	ALDH9A1	AR02	0.127324	13.9434	1.34392	0.198047	0.87269	-4.50029
Q92882	OSTF1	AR02	-0.175591	16.9416	-1.34376	0.198098	0.87269	-4.50039
Q9Y2Z0	SUGT1	AR02	-0.118334	14.1192	-1.34371	0.198115	0.87269	-4.50043
Q6PJG6	BRAT1	AR02	0.382704	9.51008	1.34366	0.198131	0.87269	-4.50046
Q9BWJ5	SF3B5	AR02	-0.244722	12.0518	-1.34327	0.198251	0.87269	-4.50069
Q8NEQ5	C1orf162	AR02	-0.45969	12.392	-1.34089	0.199006	0.875308	-4.50216
Q96HN2	AHCYL2	AR02	-0.135818	14.2754	-1.34021	0.199224	0.87556	-4.50258
O43567	RNF13	AR02	0.254668	12.2895	1.33635	0.200454	0.880253	-4.50496
Q5SY16	NOL9	AR02	0.268121	10.2851	1.33517	0.20083	0.880867	-4.50568
Q9Y6I4	USP3	AR02	-0.167295	13.7021	-1.3341	0.201173	0.880867	-4.50634
O94888	UBXN7	AR02	-0.158061	13.692	-1.33369	0.201306	0.880867	-4.5066
Q86YP4	GATAD2A	AR02	-0.149084	13.364	-1.33261	0.201651	0.880867	-4.50725
P21281	ATP6V1B2	AR02	-0.122391	17.0905	-1.33135	0.202055	0.880867	-4.50803
Q8WVQ1	CANT1	AR02	0.189578	11.9985	1.33062	0.202289	0.880867	-4.50847
O15228	GNPAT	AR02	-0.169639	12.6837	-1.3304	0.202362	0.880867	-4.50861
Q15424	SAFB	AR02	-0.189132	14.0036	-1.33032	0.202389	0.880867	-4.50866
Q06187	BTK	AR02	-0.12949	13.8933	-1.32898	0.20282	0.880867	-4.50948
Q15477	SKIC2	AR02	-0.111165	13.8154	-1.32881	0.202874	0.880867	-4.50959
Q8IYJ3	SYTL1	AR02	-0.179011	15.2709	-1.32843	0.202997	0.880867	-4.50982
Q9NR19	ACSS2	AR02	-0.149798	13.4068	-1.328	0.203135	0.880867	-4.51008
P43487	RANBP1	AR02	0.119467	14.4636	1.32714	0.203414	0.880867	-4.51061
O75367	MACROH2A1	AR02	-0.138127	18.8494	-1.32667	0.203565	0.880867	-4.51089
Q53ET0	CRTC2	AR02	-0.30924	11.2182	-1.3261	0.203748	0.880867	-4.51124
Q8N9V3	WDSUB1	AR02	-0.253443	11.1627	-1.32585	0.203829	0.880867	-4.51139
Q5T0D9	TPRG1L	AR02	0.195427	11.4554	1.32446	0.20428	0.880867	-4.51225
Q99683	MAP3K5	AR02	0.222877	11.6227	1.32442	0.204292	0.880867	-4.51227
O75534	CSDE1	AR02	0.146877	13.3345	1.32425	0.20435	0.880867	-4.51238
A5A3E0	POTEF	AR02	-0.159238	21.5879	-1.32411	0.204393	0.880867	-4.51246
Q9UNZ2	NSFL1C	AR02	-0.117968	15.0295	-1.32375	0.20451	0.880867	-4.51268
P40306	PSMB10	AR02	0.176808	13.5131	1.32359	0.204564	0.880867	-4.51278
P45954	ACADSB	AR02	-0.171331	12.6049	-1.32344	0.204613	0.880867	-4.51287
Q13555	CAMK2G	AR02	0.14103	14.0758	1.3234	0.204623	0.880867	-4.51289
P51692	STAT5B	AR02	-0.11014	15.7885	-1.32319	0.204692	0.880867	-4.51302
Q99728	BARD1	AR02	0.421981	17.3338	1.32194	0.205098	0.880867	-4.51378
Q5JTZ9	AARS2	AR02	0.328149	9.40464	1.32173	0.205168	0.880867	-4.51391
Q7Z4H8	POGLUT3	AR02	-0.179784	12.6846	-1.32069	0.205507	0.880867	-4.51455
Q9H6T3	RPAP3	AR02	0.194583	11.3406	1.32068	0.20551	0.880867	-4.51455
Q16891	IMMT	AR02	-0.11603	14.1133	-1.31982	0.20579	0.880867	-4.51508
P61106	RAB14	AR02	-0.161155	16.1817	-1.31908	0.206033	0.880867	-4.51553
P17655	CAPN2	AR02	-0.154125	13.401	-1.31888	0.206096	0.880867	-4.51565
Q96KQ4	PPP1R13B	AR02	-0.314056	14.6563	-1.31837	0.206264	0.880867	-4.51596
Q9HCK5	AGO4	AR02	-0.0964601	14.2984	-1.31823	0.206307	0.880867	-4.51604
Q9NYR9	NKIRAS2	AR02	-0.183217	12.1631	-1.31801	0.206382	0.880867	-4.51618
Q08945	SSRP1	AR02	-0.0903662	14.3652	-1.31793	0.206408	0.880867	-4.51623
P49773	HINT1	AR02	-0.158266	16.0979	-1.31689	0.206746	0.88162	-4.51686
P46778	RPL21	AR02	-0.591845	13.9305	-1.3151	0.207333	0.88273	-4.51795
Q9UK41	VPS28	AR02	-0.150217	14.4333	-1.31496	0.207381	0.88273	-4.51804
P62424	RPL7A	AR02	-0.195697	15.7616	-1.31462	0.207492	0.88273	-4.51824
Q6PKG0	LARP1	AR02	-0.238955	12.7652	-1.31334	0.207912	0.883066	-4.51902
Q9BTE1	DCTN5	AR02	-0.344232	12.0566	-1.31307	0.208002	0.883066	-4.51919
Q04206	RELA	AR02	-0.127356	13.2671	-1.3121	0.208321	0.883066	-4.51978
Q7Z6K3	PTAR1	AR02	0.215206	11.4008	1.31185	0.208402	0.883066	-4.51992
Q12980	NPRL3	AR02	0.28028	10.1986	1.31144	0.208539	0.883066	-4.52018
P27816	MAP4	AR02	-0.139609	13.8257	-1.31143	0.208542	0.883066	-4.52018
O95249	GOSR1	AR02	-0.296961	12.4108	-1.31034	0.2089	0.883547	-4.52084
Q9Y3B9	RRP15	AR02	-0.248883	13.5095	-1.30968	0.20912	0.883547	-4.52124
Q9UMZ2	SYNRG	AR02	-0.167179	12.1768	-1.30961	0.209142	0.883547	-4.52128
Q9UBT7	CTNNAL1	AR02	0.248744	13.6917	1.30841	0.209538	0.884536	-4.52201
P15121	AKR1B1	AR02	-0.218849	13.0194	-1.30776	0.209755	0.884768	-4.52241
P32119	PRDX2	AR02	0.228573	16.7367	1.30684	0.21006	0.885367	-4.52296
Q96JH7	VCPIP1	AR02	-0.13756	13.8182	-1.3061	0.210305	0.885715	-4.52341
Q99733	NAP1L4	AR02	-0.258735	14.8181	-1.3047	0.21077	0.886185	-4.52426
Q9NUK0	MBNL3	AR02	-0.32288	12.1686	-1.30406	0.210982	0.886185	-4.52464
Q9UEU0	VTI1B	AR02	-0.368134	12.5914	-1.30399	0.211006	0.886185	-4.52469
Q9Y6M5	SLC30A1	AR02	0.386967	10.6646	1.30346	0.211181	0.886185	-4.525
Q9HAV7	GRPEL1	AR02	0.275498	11.3647	1.30252	0.211494	0.886185	-4.52557
Q9P2X0	DPM3	AR02	0.221719	12.1887	1.30228	0.211576	0.886185	-4.52572
P48556	PSMD8	AR02	0.133409	14.9731	1.30165	0.211785	0.886185	-4.5261
Q96FJ0	STAMBPL1	AR02	0.290717	11.9978	1.30033	0.212226	0.886185	-4.5269
Q5HYK7	SH3D19	AR02	-0.154586	15.711	-1.30022	0.212264	0.886185	-4.52696
O00231	PSMD11	AR02	0.0834365	15.1267	1.30016	0.212282	0.886185	-4.527
Q5JTV8	TOR1AIP1	AR02	-0.140385	16.6057	-1.2997	0.212438	0.886185	-4.52728
Q8N3F8	MICALL1	AR02	-0.150898	12.1476	-1.29958	0.212478	0.886185	-4.52735
Q9UQR1	ZNF148	AR02	0.13632	13.9116	1.2984	0.212874	0.886185	-4.52806
P48637	GSS	AR02	0.123666	14.7314	1.29835	0.212888	0.886185	-4.52809
Q15599	NHERF2	AR02	0.452102	9.82766	1.29819	0.212943	0.886185	-4.52819
Q96F63	CCDC97	AR02	-0.383056	11.4561	-1.29741	0.213206	0.886185	-4.52866
P16157	ANK1	AR02	0.302985	14.5944	1.29691	0.213372	0.886185	-4.52896
Q9Y376	CAB39	AR02	0.0925009	15.9819	1.29683	0.213397	0.886185	-4.529
Q9H3P2	NELFA	AR02	-0.133687	17.4969	-1.29616	0.213625	0.886185	-4.52941
Q9Y336	SIGLEC9	AR02	-0.507158	11.5553	-1.29574	0.213765	0.886185	-4.52966
P32969	RPL9	AR02	-0.358681	11.9821	-1.29505	0.213995	0.886185	-4.53007
P40855	PEX19	AR02	0.275361	11.5366	1.29496	0.214026	0.886185	-4.53013
Q92896	GLG1	AR02	-0.206685	12.4449	-1.29459	0.214153	0.886185	-4.53036
O43166	SIPA1L1	AR02	-0.187864	11.7479	-1.2936	0.214486	0.886712	-4.53095
O60925	PFDN1	AR02	0.0966404	14.1077	1.29275	0.214772	0.886712	-4.53146
Q8TDX7	NEK7	AR02	-0.159672	13.1361	-1.29247	0.214867	0.886712	-4.53163
P15056	BRAF	AR02	0.151183	13.4588	1.29182	0.215088	0.886712	-4.53202
P53004	BLVRA	AR02	0.107424	16.4094	1.29135	0.215247	0.886712	-4.5323
P06239	LCK	AR02	-0.263291	11.6131	-1.28995	0.215719	0.886712	-4.53314
P49821	NDUFV1	AR02	0.10786	13.714	1.28974	0.215789	0.886712	-4.53327
Q08AM6	VAC14	AR02	-0.0966145	13.0852	-1.28939	0.21591	0.886712	-4.53348
Q9NRG0	CHRAC1	AR02	0.215246	12.282	1.28921	0.215968	0.886712	-4.53358
P78406	RAE1	AR02	-0.097365	13.458	-1.28904	0.216026	0.886712	-4.53368
Q9Y6R4	MAP3K4	AR02	-0.343043	11.2811	-1.28892	0.216069	0.886712	-4.53376
Q15382	RHEB	AR02	0.126644	14.6414	1.28755	0.216534	0.887091	-4.53458
Q96RN5	MED15	AR02	0.249805	11.7305	1.28745	0.216566	0.887091	-4.53464
O14618	CCS	AR02	0.387283	13.6205	1.28668	0.216828	0.887091	-4.5351
O96005	CLPTM1	AR02	-0.181763	11.9683	-1.28585	0.21711	0.887091	-4.5356
P31751	AKT2	AR02	0.184069	11.9748	1.28506	0.217379	0.887091	-4.53607
Q6PJI9	WDR59	AR02	-0.309628	11.2067	-1.28432	0.217632	0.887091	-4.53651
Q08380	LGALS3BP	AR02	0.127547	12.4566	1.28401	0.217739	0.887091	-4.5367
P82663	MRPS25	AR02	0.277032	10.529	1.28396	0.217755	0.887091	-4.53673
Q712K3	UBE2R2	AR02	-0.299648	12.1674	-1.28325	0.217997	0.887091	-4.53715
Q14692	BMS1	AR02	0.405105	9.62262	1.28237	0.218298	0.887091	-4.53768
Q9Y2H6	FNDC3A	AR02	-0.196394	10.3697	-1.28236	0.2183	0.887091	-4.53768
O00712	NFIB	AR02	-0.340204	16.8633	-1.2817	0.218528	0.887091	-4.53808
Q13574	DGKZ	AR02	-0.118087	13.6918	-1.28168	0.218533	0.887091	-4.53809
P27105	STOM	AR02	0.12086	18.8299	1.28155	0.218579	0.887091	-4.53817
P22314	UBA1	AR02	-0.126986	17.1558	-1.28114	0.218717	0.887091	-4.53841
O75019	LILRA1	AR02	0.168146	16.1178	1.28101	0.218764	0.887091	-4.53849
P41218	MNDA	AR02	-0.301068	19.3958	-1.2802	0.219041	0.88733	-4.53897
Q16854	DGUOK	AR02	0.328436	12.3097	1.27982	0.219172	0.88733	-4.5392
Q9UI30	TRMT112	AR02	-0.209423	12.5382	-1.27903	0.219441	0.88733	-4.53967
Q9UL33	TRAPPC2L	AR02	0.246514	10.9754	1.27894	0.219473	0.88733	-4.53973
P31323	PRKAR2B	AR02	-0.150474	13.5328	-1.27773	0.219889	0.887338	-4.54045
Q9BUB7	TMEM70	AR02	0.247064	11.0683	1.27771	0.219897	0.887338	-4.54046
P62891	RPL39	AR02	-0.281075	13.1113	-1.27751	0.219963	0.887338	-4.54058
Q8IYB3	SRRM1	AR02	-0.130584	13.7826	-1.2769	0.220174	0.88753	-4.54094
Q9NWU5	MRPL22	AR02	-0.411844	10.6286	-1.27611	0.220444	0.887964	-4.54141
P12110	COL6A2	AR02	0.363659	15.3174	1.27441	0.221031	0.889108	-4.54242
Q14739	LBR	AR02	-0.205776	17.3634	-1.27424	0.221091	0.889108	-4.54252
Q7Z2H8	SLC36A1	AR02	0.160748	13.0146	1.27387	0.221217	0.889108	-4.54274
O95758	PTBP3	AR02	-0.186822	14.2133	-1.27334	0.221401	0.889193	-4.54306
Q8WWY3	PRPF31	AR02	-0.142109	13.9808	-1.27199	0.22187	0.889885	-4.54386
Q96TA2	YME1L1	AR02	-0.493105	13.926	-1.2719	0.2219	0.889885	-4.54391
O95104	SCAF4	AR02	-0.284833	11.1693	-1.27131	0.222104	0.890048	-4.54426
O75832	PSMD10	AR02	-0.237358	12.5305	-1.27001	0.222557	0.890489	-4.54504
Q9UHG3	PCYOX1	AR02	0.101162	14.3778	1.26998	0.222567	0.890489	-4.54506
Q9GZM8	NDEL1	AR02	-0.180609	11.9176	-1.26918	0.222844	0.890489	-4.54553
P53396	ACLY	AR02	0.0805662	15.9649	1.26854	0.223064	0.890489	-4.5459
Q0VG06	FAAP100	AR02	0.374453	11.4048	1.26833	0.223139	0.890489	-4.54603
Q9H553	ALG2	AR02	0.143829	13.1911	1.26783	0.223312	0.890489	-4.54633
Q68CQ7	GLT8D1	AR02	0.271002	9.71097	1.2673	0.223498	0.890489	-4.54664
Q969N2	PIGT	AR02	-0.125978	12.2898	-1.26707	0.223578	0.890489	-4.54678
P23743	DGKA	AR02	-0.0938006	15.2372	-1.2667	0.223706	0.890489	-4.547
P33947	KDELR2	AR02	0.34923	10.215	1.26629	0.223848	0.890489	-4.54724
Q7LG56	RRM2B	AR02	0.478875	11.3957	1.26508	0.22427	0.890489	-4.54795
Q9UL18	AGO1	AR02	-0.116447	12.8273	-1.26436	0.224522	0.890489	-4.54838
Q68E01	INTS3	AR02	-0.117214	13.1671	-1.26382	0.224711	0.890489	-4.5487
Q9Y5A7	NUB1	AR02	0.20893	12.7436	1.26356	0.224803	0.890489	-4.54886
Q9BSD7	NTPCR	AR02	-0.24977	12.4134	-1.26285	0.225052	0.890489	-4.54928
Q5JTW2	CEP78	AR02	-0.564359	12.5527	-1.26184	0.225405	0.890489	-4.54987
Q9UJA5	TRMT6	AR02	-0.258409	10.9482	-1.2613	0.225595	0.890489	-4.55019
Q9BYU1	PBX4	AR02	0.441133	8.62591	1.26118	0.225635	0.890489	-4.55026
P23588	EIF4B	AR02	0.338466	12.3865	1.26108	0.22567	0.890489	-4.55032
Q9UBT2	UBA2	AR02	0.140297	13.8672	1.26101	0.225696	0.890489	-4.55036
P09417	QDPR	AR02	-0.106652	14.8555	-1.26087	0.225744	0.890489	-4.55044
P06899	H2BC11	AR02	-0.378663	21.7296	-1.2607	0.225806	0.890489	-4.55055
P51178	PLCD1	AR02	-0.11594	13.0849	-1.26008	0.226021	0.890692	-4.55091
Q86TV6	TTC7B	AR02	-0.234029	11.663	-1.2592	0.226333	0.891276	-4.55143
Q8IUC8	GALNT13	AR02	0.30949	13.1537	1.25859	0.226546	0.891472	-4.55179
P61964	WDR5	AR02	-0.135948	13.397	-1.25749	0.226935	0.892066	-4.55244
Q14738	PPP2R5D	AR02	0.123236	13.5071	1.25641	0.227314	0.892066	-4.55307
P21127	CDK11B	AR02	0.111495	14.7194	1.25552	0.22763	0.892066	-4.5536
Q9HCN8	SDF2L1	AR02	0.136298	14.625	1.25448	0.227996	0.892066	-4.55421
Q13442	PDAP1	AR02	-0.285427	13.8799	-1.25437	0.228037	0.892066	-4.55427
Q969H8	MYDGF	AR02	-0.137461	15.8086	-1.25423	0.228086	0.892066	-4.55436
P18621	RPL17	AR02	-0.40587	13.9131	-1.25406	0.228145	0.892066	-4.55445
P50613	CDK7	AR02	-0.234189	11.1697	-1.25348	0.22835	0.892066	-4.55479
Q9UGN4	CD300A	AR02	-0.291518	12.733	-1.25323	0.22844	0.892066	-4.55494
Q9P1Z2	CALCOCO1	AR02	0.203201	11.7237	1.25282	0.228586	0.892066	-4.55518
P02656	APOC3	AR02	-0.345029	12.6604	-1.25258	0.228668	0.892066	-4.55532
Q13523	PRPF4B	AR02	0.141931	12.5431	1.25192	0.228904	0.892066	-4.55571
Q14050	COL9A3	AR02	-0.61428	12.4057	-1.25164	0.229003	0.892066	-4.55588
Q3MHD2	LSM12	AR02	0.198485	13.0435	1.25139	0.229091	0.892066	-4.55602
Q9H9F9	ACTR5	AR02	0.262621	10.5198	1.25122	0.22915	0.892066	-4.55612
Q9BWM7	SFXN3	AR02	-0.137584	13.6039	-1.24947	0.229773	0.892152	-4.55715
Q99836	MYD88	AR02	0.183034	13.7769	1.2494	0.229799	0.892152	-4.55719
P29144	TPP2	AR02	0.0889443	15.5791	1.24841	0.230152	0.892152	-4.55777
Q14258	TRIM25	AR02	-0.116253	14.3228	-1.24827	0.230202	0.892152	-4.55785
Q86XP1	DGKH	AR02	-0.24006	12.1124	-1.24771	0.230399	0.892152	-4.55818
Q9NRR5	UBQLN4	AR02	0.212726	11.1198	1.24748	0.230482	0.892152	-4.55831
Q9BQ52	ELAC2	AR02	-0.343657	14.7807	-1.24719	0.230586	0.892152	-4.55848
P55201	BRPF1	AR02	-0.164361	14.2623	-1.24703	0.230642	0.892152	-4.55857
Q15291	RBBP5	AR02	0.192604	11.4794	1.24652	0.230827	0.892152	-4.55888
P23246	SFPQ	AR02	0.138557	15.305	1.24622	0.230931	0.892152	-4.55905
P61457	PCBD1	AR02	0.14516	13.5827	1.24611	0.230972	0.892152	-4.55912
Q9NW64	RBM22	AR02	-0.148202	12.1059	-1.24536	0.231239	0.892555	-4.55955
P49588	AARS1	AR02	0.125749	12.7166	1.24444	0.231569	0.892586	-4.56009
P49750	YLPM1	AR02	-0.140513	12.6764	-1.24442	0.231575	0.892586	-4.5601
Q86T03	PIP4P1	AR02	-0.134884	13.6479	-1.24371	0.231829	0.892607	-4.56052
Q9H706	GAREM1	AR02	0.446162	10.7433	1.24312	0.232044	0.892607	-4.56087
Q6ZSZ5	ARHGEF18	AR02	-0.0898162	14.2256	-1.24214	0.232392	0.892607	-4.56143
P57772	EEFSEC	AR02	-0.135019	13.5905	-1.24211	0.232403	0.892607	-4.56145
O75663	TIPRL	AR02	0.189442	13.1839	1.2412	0.232731	0.892607	-4.56198
Q96RT1	ERBIN	AR02	0.134817	13.6083	1.2401	0.233125	0.892607	-4.56262
Q9BRR6	ADPGK	AR02	-0.10594	15.1414	-1.23953	0.233332	0.892607	-4.56296
P31943	HNRNPH1	AR02	-0.149811	16.1086	-1.23925	0.233433	0.892607	-4.56312
P24941	CDK2	AR02	-0.156177	12.6584	-1.23888	0.233565	0.892607	-4.56333
Q9Y5B6	PAXBP1	AR02	0.192239	12.1385	1.23827	0.233787	0.892607	-4.56369
P62487	POLR2G	AR02	0.12226	12.5652	1.23823	0.233802	0.892607	-4.56372
Q96I25	RBM17	AR02	0.128725	12.7599	1.23749	0.234069	0.892607	-4.56415
P16220	CREB1	AR02	-0.167705	13.7017	-1.23717	0.234183	0.892607	-4.56433
Q9H0U6	MRPL18	AR02	-0.214869	10.9448	-1.23645	0.234442	0.892607	-4.56475
Q13153	PAK1	AR02	-0.130861	14.0745	-1.23645	0.234445	0.892607	-4.56475
Q14164	IKBKE	AR02	0.353776	11.6191	1.23586	0.234658	0.892607	-4.5651
Q9Y217	MTMR6	AR02	-0.108332	12.9975	-1.2355	0.234788	0.892607	-4.56531
Q7L8L6	FASTKD5	AR02	-0.303678	11.893	-1.23543	0.234814	0.892607	-4.56535
Q9H8W4	PLEKHF2	AR02	-0.259793	13.9915	-1.23523	0.234886	0.892607	-4.56546
Q9Y2Y9	KLF13	AR02	-0.373351	10.8792	-1.23514	0.234917	0.892607	-4.56551
P78346	RPP30	AR02	-0.420304	10.0498	-1.23459	0.235117	0.892607	-4.56583
O95347	SMC2	AR02	-0.125122	13.627	-1.23441	0.235181	0.892607	-4.56594
P13861	PRKAR2A	AR02	0.110929	14.7214	1.23283	0.235756	0.894169	-4.56686
Q9C0H2	TTYH3	AR02	0.29133	11.0967	1.23229	0.235952	0.894289	-4.56717
Q86W50	METTL16	AR02	-0.240025	11.3933	-1.23165	0.236185	0.894297	-4.56754
Q8N6H7	ARFGAP2	AR02	-0.210508	13.9597	-1.23092	0.236449	0.894297	-4.56796
Q9H496	TOR1AIP2	AR02	0.306513	10.02	1.23052	0.236596	0.894297	-4.5682
P59768	GNG2	AR02	-0.213473	15.1428	-1.23048	0.23661	0.894297	-4.56822
P84090	ERH	AR02	0.216311	11.9798	1.22975	0.236875	0.894391	-4.56864
P11586	MTHFD1	AR02	0.109847	16.3273	1.22834	0.237389	0.894391	-4.56946
Q15393	SF3B3	AR02	0.0833037	14.6324	1.22813	0.237468	0.894391	-4.56958
Q15751	HERC1	AR02	0.312505	10.7641	1.22769	0.237628	0.894391	-4.56984
Q9H7Z6	KAT8	AR02	-0.201537	11.4202	-1.22681	0.237947	0.894391	-4.57034
P34949	MPI	AR02	-0.112708	14.5659	-1.2266	0.238027	0.894391	-4.57047
Q10471	GALNT2	AR02	0.179088	12.1081	1.22589	0.238284	0.894391	-4.57088
P08174	CD55	AR02	0.136263	14.0524	1.22588	0.238287	0.894391	-4.57088
Q9H074	PAIP1	AR02	0.164173	13.6567	1.225	0.238611	0.894391	-4.57139
Q4G148	GXYLT1	AR02	0.349036	9.88255	1.22286	0.239395	0.894391	-4.57263
P42685	FRK	AR02	0.212633	14.9584	1.22286	0.239397	0.894391	-4.57263
Q12765	SCRN1	AR02	-0.13119	12.7119	-1.22257	0.239502	0.894391	-4.57279
P07954	FH	AR02	0.119097	14.3893	1.22141	0.239929	0.894391	-4.57346
Q05084	ICA1	AR02	-0.34078	10.2811	-1.22102	0.240074	0.894391	-4.57369
Q96AT9	RPE	AR02	-0.321612	12.8501	-1.21966	0.240574	0.894391	-4.57447
Q9Y3D9	MRPS23	AR02	0.176121	12.4112	1.21937	0.240679	0.894391	-4.57464
Q05519	SRSF11	AR02	-0.199666	12.9547	-1.21881	0.240887	0.894391	-4.57496
P37275	ZEB1	AR02	-0.348779	12.0855	-1.21858	0.240972	0.894391	-4.57509
Q6UXV4	APOOL	AR02	-0.135179	12.3949	-1.21776	0.241276	0.894391	-4.57557
P35637	FUS	AR02	-0.208854	15.0853	-1.21708	0.241528	0.894391	-4.57596
P15153	RAC2	AR02	0.203027	19.0293	1.21535	0.242166	0.894391	-4.57695
Q86WX3	RPS19BP1	AR02	-0.280643	12.7611	-1.21526	0.242201	0.894391	-4.577
Q8TAP6	CEP76	AR02	0.359673	15.1278	1.21521	0.24222	0.894391	-4.57703
Q92841	DDX17	AR02	-0.128109	15.4691	-1.21515	0.242242	0.894391	-4.57707
Q6NSW5		AR02	0.147102	14.12	1.21455	0.242463	0.894391	-4.57741
Q9Y3Y2	CHTOP	AR02	-0.395499	11.9193	-1.21382	0.242737	0.894391	-4.57783
O75521	ECI2	AR02	-0.180185	11.0097	-1.21377	0.242752	0.894391	-4.57786
Q9UGJ1	TUBGCP4	AR02	-0.237093	11.5534	-1.21327	0.24294	0.894391	-4.57815
P61326	MAGOH	AR02	0.105475	15.2106	1.2131	0.243002	0.894391	-4.57824
Q9Y6G9	DYNC1LI1	AR02	-0.145848	13.6481	-1.21308	0.243008	0.894391	-4.57825
P35249	RFC4	AR02	0.167106	12.885	1.21276	0.243128	0.894391	-4.57843
Q96K17	BTF3L4	AR02	0.222488	14.3291	1.21263	0.243177	0.894391	-4.57851
P22352	GPX3	AR02	0.160968	11.4374	1.21194	0.243434	0.894391	-4.57891
P49441	INPP1	AR02	0.192422	11.8907	1.21175	0.243503	0.894391	-4.57901
A0AV96	RBM47	AR02	-0.136169	13.021	-1.21168	0.243529	0.894391	-4.57905
P83881	RPL36A	AR02	-0.19402	11.589	-1.21115	0.243727	0.894391	-4.57936
P09669	COX6C	AR02	0.513448	14.4003	1.21062	0.243926	0.894391	-4.57966
Q9BPX7	C7orf25	AR02	-0.239625	12.5298	-1.21038	0.244016	0.894391	-4.5798
Q7KZ85	SUPT6H	AR02	0.104209	14.2622	1.20991	0.244192	0.894391	-4.58007
Q86WJ1	CHD1L	AR02	0.227993	11.5237	1.20961	0.244301	0.894391	-4.58024
O60762	DPM1	AR02	-0.137506	13.3825	-1.20956	0.244321	0.894391	-4.58027
Q9NSE4	IARS2	AR02	-0.115476	13.3093	-1.20947	0.244356	0.894391	-4.58032
Q9HCD6	TANC2	AR02	-0.329443	11.4001	-1.20885	0.244586	0.894391	-4.58068
Q13586	STIM1	AR02	-0.131778	14.4748	-1.20876	0.24462	0.894391	-4.58073
Q96EC8	YIPF6	AR02	0.360278	11.7926	1.20811	0.244861	0.894391	-4.5811
P00488	F13A1	AR02	0.148514	15.525	1.20787	0.244953	0.894391	-4.58124
O75132	ZBED4	AR02	0.198709	15.0293	1.20638	0.245511	0.894391	-4.58209
O75964	ATP5MG	AR02	0.226818	14.2003	1.20626	0.245556	0.894391	-4.58216
Q9Y5P4	CERT1	AR02	0.17659	13.1719	1.20497	0.246038	0.894391	-4.58289
P53597	SUCLG1	AR02	0.119212	13.5197	1.20472	0.246133	0.894391	-4.58304
Q6EEV6	SUMO4	AR02	-0.22093	12.4269	-1.20467	0.246152	0.894391	-4.58307
Q96GC9	VMP1	AR02	-0.241215	12.2376	-1.20405	0.246384	0.894391	-4.58342
O75882	ATRN	AR02	0.293128	10.6415	1.20321	0.246699	0.894391	-4.5839
Q9BT78	COPS4	AR02	0.0852045	14.0097	1.20306	0.246755	0.894391	-4.58398
Q9BSH4	TACO1	AR02	-0.218892	10.7212	-1.20281	0.246849	0.894391	-4.58412
O60716	CTNND1	AR02	-0.175949	12.8774	-1.20274	0.246876	0.894391	-4.58417
O14896	IRF6	AR02	0.602513	15.1473	1.20209	0.247121	0.894391	-4.58454
Q08722	CD47	AR02	0.283828	16.2654	1.20148	0.247351	0.894391	-4.58489
P15954	COX7C	AR02	0.255617	14.6009	1.20132	0.247412	0.894391	-4.58498
P00395	COX1	AR02	0.393549	11.0689	1.2013	0.247419	0.894391	-4.58499
O94874	UFL1	AR02	-0.115065	13.9982	-1.20079	0.247612	0.894391	-4.58528
Q9BV73	CEP250	AR02	-0.159699	15.1667	-1.20054	0.247705	0.894391	-4.58542
P24723	PRKCH	AR02	0.291938	16.2057	1.19977	0.247997	0.894391	-4.58586
Q4KMP7	TBC1D10B	AR02	0.119477	13.1016	1.19955	0.248078	0.894391	-4.58598
Q96ER9	CCDC51	AR02	-0.450059	9.46623	-1.1995	0.248096	0.894391	-4.58601
P68363	TUBA1B	AR02	-0.160117	18.9615	-1.19939	0.248138	0.894391	-4.58607
Q9NRZ7	AGPAT3	AR02	0.220836	10.951	1.19812	0.248619	0.894391	-4.5868
P62826	RAN	AR02	0.107853	17.6419	1.19777	0.248752	0.894391	-4.587
P49841	GSK3B	AR02	-0.133466	12.6722	-1.19765	0.248796	0.894391	-4.58706
Q9BTC0	DIDO1	AR02	-0.136965	12.0942	-1.19762	0.248807	0.894391	-4.58708
Q9UBV8	PEF1	AR02	0.143012	14.0955	1.19694	0.249066	0.894391	-4.58747
P34932	HSPA4	AR02	-0.138487	15.0547	-1.19693	0.249071	0.894391	-4.58747
Q8TD17	ZNF398	AR02	0.167621	14.9031	1.19601	0.24942	0.894391	-4.588
Q14694	USP10	AR02	0.156071	12.227	1.19549	0.249616	0.894391	-4.58829
P36897	TGFBR1	AR02	0.23409	13.2707	1.19544	0.249633	0.894391	-4.58832
O43639	NCK2	AR02	-0.121756	13.1322	-1.19496	0.249817	0.894391	-4.58859
P09488	GSTM1	AR02	1.21003	13.8053	1.1944	0.25003	0.894391	-4.58891
Q96DE0	NUDT16	AR02	0.114906	13.555	1.1943	0.250069	0.894391	-4.58897
O15254	ACOX3	AR02	0.129086	15.1281	1.19426	0.250081	0.894391	-4.58899
Q96I99	SUCLG2	AR02	0.123875	13.8267	1.19402	0.250173	0.894391	-4.58912
P35475	IDUA	AR02	0.243433	11.0599	1.19377	0.250268	0.894391	-4.58926
P84085	ARF5	AR02	0.126798	18.0808	1.19371	0.250291	0.894391	-4.5893
Q96T88	UHRF1	AR02	0.179545	17.1463	1.19353	0.250358	0.894391	-4.5894
P12694	BCKDHA	AR02	-0.243648	11.218	-1.1934	0.25041	0.894391	-4.58948
Q9UJX2	CDC23	AR02	0.218373	12.0374	1.19259	0.250719	0.894838	-4.58994
P05165	PCCA	AR02	0.245072	10.8353	1.19112	0.251277	0.894838	-4.59076
P49585	PCYT1A	AR02	0.145151	13.4369	1.19051	0.251512	0.894838	-4.59111
O43707	ACTN4	AR02	-0.114667	17.7611	-1.18932	0.251967	0.894838	-4.59179
Q6UX71	PLXDC2	AR02	0.502447	9.08975	1.18909	0.252054	0.894838	-4.59192
O94903	PLPBP	AR02	-0.088828	15.0051	-1.18834	0.25234	0.894838	-4.59234
Q01484	ANK2	AR02	0.218585	12.8507	1.18826	0.252371	0.894838	-4.59238
P09661	SNRPA1	AR02	-0.0969156	15.4783	-1.18814	0.252416	0.894838	-4.59245
P05386	RPLP1	AR02	-0.345345	15.0205	-1.18809	0.252435	0.894838	-4.59248
Q14847	LASP1	AR02	-0.127875	16.5023	-1.18809	0.252437	0.894838	-4.59248
P30154	PPP2R1B	AR02	-0.139192	12.199	-1.18805	0.252449	0.894838	-4.5925
Q15631	TSN	AR02	-0.225148	15.7446	-1.18791	0.252504	0.894838	-4.59258
O95248	SBF1	AR02	-0.117538	12.8177	-1.1869	0.252892	0.895348	-4.59315
Q12824	SMARCB1	AR02	-0.154075	12.572	-1.18638	0.253091	0.895348	-4.59345
Q6ULP2	AFTPH	AR02	0.178716	11.2004	1.18594	0.25326	0.895348	-4.59369
Q9UHD8	SEPTIN9	AR02	-0.129081	16.0277	-1.18582	0.253304	0.895348	-4.59376
O60313	OPA1	AR02	-0.14367	13.2208	-1.18477	0.253709	0.895381	-4.59435
P50990	CCT8	AR02	0.0861353	16.0485	1.18447	0.253825	0.895381	-4.59452
P31939	ATIC	AR02	0.107641	15.3731	1.18427	0.2539	0.895381	-4.59463
P18074	ERCC2	AR02	0.30339	10.162	1.18409	0.25397	0.895381	-4.59474
Q9UIA9	XPO7	AR02	0.0824388	14.3025	1.18286	0.254443	0.895553	-4.59543
Q9Y613	FHOD1	AR02	0.114319	12.7998	1.18254	0.254565	0.895553	-4.59561
O00115	DNASE2	AR02	0.185599	12.2643	1.18237	0.254631	0.895553	-4.5957
Q6NYC8	PPP1R18	AR02	-0.17532	13.8518	-1.1821	0.254736	0.895553	-4.59586
Q8TDZ2	MICAL1	AR02	-0.153923	15.2937	-1.18135	0.255023	0.895553	-4.59628
O75038	PLCH2	AR02	0.291994	13.5478	1.17994	0.25557	0.895553	-4.59707
P53999	SUB1	AR02	-0.150982	16.6579	-1.17909	0.255899	0.895553	-4.59755
Q8TB72	PUM2	AR02	-0.174503	12.525	-1.17861	0.256083	0.895553	-4.59782
Q02094	RHAG	AR02	0.297181	14.1213	1.17814	0.256266	0.895553	-4.59808
Q2M2I8	AAK1	AR02	-0.0973287	13.7051	-1.17798	0.256325	0.895553	-4.59817
Q96HR3	MED30	AR02	-0.138331	11.2912	-1.17769	0.25644	0.895553	-4.59834
O14656	TOR1A	AR02	0.114776	13.4272	1.1774	0.25655	0.895553	-4.59849
Q3KQZ1	SLC25A35	AR02	0.178178	11.6579	1.17736	0.256567	0.895553	-4.59852
Q9NUP1	BLOC1S4	AR02	0.223176	12.8207	1.17664	0.256845	0.895553	-4.59892
P17931	LGALS3	AR02	0.145528	17.4049	1.17644	0.256924	0.895553	-4.59904
Q7RTS9	DYM	AR02	0.18569	11.781	1.17571	0.257209	0.895553	-4.59945
Q9NXD2	MTMR10	AR02	-0.154965	14.5908	-1.17516	0.257419	0.895553	-4.59975
Q5QJ74	TBCEL	AR02	-0.224883	11.393	-1.17505	0.257465	0.895553	-4.59982
Q6ZU80	CEP128	AR02	-0.341578	10.9416	-1.17486	0.257536	0.895553	-4.59992
Q53H12	AGK	AR02	0.0949553	13.0264	1.17468	0.257609	0.895553	-4.60002
O43488	AKR7A2	AR02	0.116931	15.6367	1.17467	0.257611	0.895553	-4.60003
P0CJ78	ZNF865	AR02	-0.330144	9.88332	-1.17425	0.257776	0.895553	-4.60026
Q8TEQ0	SNX29	AR02	0.316264	12.2674	1.17366	0.258005	0.895553	-4.60059
Q96LJ7	DHRS1	AR02	0.147597	12.3131	1.17317	0.258195	0.895553	-4.60087
P0CG39	POTEJ	AR02	-0.492256	10.7294	-1.173	0.258261	0.895553	-4.60096
Q52LR7	EPC2	AR02	-0.304279	12.6018	-1.17285	0.258317	0.895553	-4.60104
P16455		AR02	0.196961	11.2481	1.17194	0.258673	0.895553	-4.60155
Q07666	KHDRBS1	AR02	0.175789	13.9438	1.17169	0.258771	0.895553	-4.60169
Q9NQA3		AR02	-0.208448	12.509	-1.17166	0.258781	0.895553	-4.60171
P13598	ICAM2	AR02	0.363708	10.4123	1.16885	0.259882	0.89686	-4.60328
Q9HD33	MRPL47	AR02	0.156305	11.352	1.16879	0.259902	0.89686	-4.60331
Q9HCD5	NCOA5	AR02	0.133582	12.3934	1.16869	0.259944	0.89686	-4.60337
Q86SQ7	SDCCAG8	AR02	0.590489	9.65421	1.16846	0.260033	0.89686	-4.6035
Q9H078	CLPB	AR02	-0.151542	11.7158	-1.16811	0.26017	0.89686	-4.60369
Q16740	CLPP	AR02	0.174582	11.6484	1.16758	0.260376	0.89686	-4.60399
Q6NUK4	REEP3	AR02	0.560058	10.5187	1.16741	0.260444	0.89686	-4.60408
Q16774	GUK1	AR02	0.297398	12.5303	1.16618	0.260925	0.89686	-4.60477
P62266	RPS23	AR02	-0.253943	13.7423	-1.16572	0.261108	0.89686	-4.60503
O60664	PLIN3	AR02	-0.153218	16.4358	-1.16531	0.26127	0.89686	-4.60525
Q13616	CUL1	AR02	0.133979	12.9646	1.16507	0.261361	0.89686	-4.60538
P40616	ARL1	AR02	0.11019	15.2129	1.16437	0.261638	0.89686	-4.60578
Q5GLZ8	HERC4	AR02	0.0987016	13.5484	1.16427	0.261677	0.89686	-4.60583
A0FGR8	ESYT2	AR02	-0.108286	15.8455	-1.16415	0.261723	0.89686	-4.6059
Q9Y2K7	KDM2A	AR02	0.110666	12.5217	1.1639	0.261825	0.89686	-4.60604
O15371	EIF3D	AR02	-0.177628	12.9014	-1.16339	0.262023	0.89686	-4.60632
Q68DK7	MSL1	AR02	-0.349077	10.2576	-1.16322	0.26209	0.89686	-4.60641
Q5BJF6	ODF2	AR02	0.127895	11.3948	1.16291	0.262212	0.89686	-4.60659
Q9NQ11	ATP13A2	AR02	0.230456	11.1622	1.1624	0.262412	0.89686	-4.60687
P30038	ALDH4A1	AR02	0.0961344	14.1883	1.16126	0.262861	0.89686	-4.6075
Q96RU3	FNBP1	AR02	0.103193	14.0154	1.16094	0.262989	0.89686	-4.60768
Q13617	CUL2	AR02	0.0808019	13.8303	1.16076	0.263061	0.89686	-4.60778
O15084	ANKRD28	AR02	-0.180703	12.8856	-1.16064	0.263109	0.89686	-4.60785
O94829	IPO13	AR02	-0.161771	11.0018	-1.16016	0.263297	0.89686	-4.60811
P63151	PPP2R2A	AR02	-0.16579	13.096	-1.15999	0.263363	0.89686	-4.60821
Q9Y6B6	SAR1B	AR02	0.167579	13.5921	1.15834	0.264018	0.89686	-4.60912
Q8WUD1	RAB2B	AR02	-0.176884	15.5958	-1.15814	0.264098	0.89686	-4.60924
Q15785	TOMM34	AR02	-0.185761	11.5704	-1.15761	0.264307	0.89686	-4.60953
Q6PGP7	SKIC3	AR02	0.0927531	13.404	1.15738	0.264396	0.89686	-4.60965
A6NDU8	RIMOC1	AR02	-0.143426	12.5222	-1.15651	0.264745	0.89686	-4.61014
Q9UDW1	UQCR10	AR02	0.160359	15.1856	1.15622	0.264856	0.89686	-4.6103
Q9UNF0	PACSIN2	AR02	-0.0884824	15.8026	-1.15618	0.264873	0.89686	-4.61032
Q6UW02	CYP20A1	AR02	-0.131963	11.7582	-1.15592	0.264977	0.89686	-4.61046
Q5VZ89	DENND4C	AR02	0.196083	11.8177	1.15558	0.265112	0.89686	-4.61065
O43189	PHF1	AR02	-0.272331	10.9034	-1.15539	0.265185	0.89686	-4.61075
O14730	RIOK3	AR02	-0.276	11.8814	-1.15504	0.265328	0.89686	-4.61095
Q6PJG2	MIDEAS	AR02	-0.157584	13.8454	-1.15477	0.265434	0.89686	-4.6111
Q9Y282	ERGIC3	AR02	-0.197222	11.836	-1.15397	0.26575	0.89686	-4.61154
Q7KZI7	MARK2	AR02	-0.155057	14.7199	-1.15391	0.265775	0.89686	-4.61157
O00716	E2F3	AR02	-0.331713	10.7704	-1.15378	0.265829	0.89686	-4.61165
Q9Y2R2	PTPN22	AR02	-0.311466	10.9534	-1.15345	0.26596	0.89686	-4.61183
Q9Y2A7	NCKAP1	AR02	0.350892	14.8151	1.15248	0.266345	0.89686	-4.61236
Q7L1Q6	BZW1	AR02	0.136351	14.6478	1.15233	0.266407	0.89686	-4.61245
Q9UGP4	LIMD1	AR02	-0.386012	8.6119	-1.1522	0.266455	0.89686	-4.61252
P61769	B2M	AR02	0.193257	13.4424	1.15171	0.266653	0.89686	-4.61279
Q9UPN3	MACF1	AR02	-0.0747926	14.1266	-1.15117	0.266867	0.89686	-4.61309
P43686	PSMC4	AR02	0.0894563	14.9177	1.15112	0.266887	0.89686	-4.61311
P18859	ATP5PF	AR02	0.12343	13.9234	1.15013	0.267283	0.897259	-4.61366
Q13158	FADD	AR02	-0.239578	13.3741	-1.14897	0.267746	0.897259	-4.6143
Q8WXI9	GATAD2B	AR02	-0.188968	11.2801	-1.14818	0.268065	0.897259	-4.61474
P20020	ATP2B1	AR02	-0.148965	13.1146	-1.14715	0.268477	0.897259	-4.6153
P08648	ITGA5	AR02	-0.135559	12.8446	-1.14691	0.268573	0.897259	-4.61543
Q96J01	THOC3	AR02	0.143746	11.7502	1.1466	0.268699	0.897259	-4.61561
P07332	FES	AR02	-0.119873	15.0711	-1.14657	0.268708	0.897259	-4.61562
Q13077	TRAF1	AR02	-0.272073	12.2242	-1.14649	0.268743	0.897259	-4.61567
P46087	NOP2	AR02	-0.197936	11.7622	-1.14625	0.268837	0.897259	-4.6158
Q86Y82	STX12	AR02	-0.14537	13.7525	-1.14608	0.268904	0.897259	-4.61589
Q9UKI2	CDC42EP3	AR02	-0.482222	11.1646	-1.14593	0.268966	0.897259	-4.61597
Q16539	MAPK14	AR02	0.102809	16.4851	1.14578	0.269028	0.897259	-4.61606
Q9NX24	NHP2	AR02	-0.36053	14.0222	-1.14522	0.269251	0.897259	-4.61636
O94804	STK10	AR02	-0.147003	15.5626	-1.1448	0.26942	0.897259	-4.61659
Q13043	STK4	AR02	-0.151573	16.3312	-1.14467	0.269474	0.897259	-4.61667
O00214	LGALS8	AR02	0.211124	13.3833	1.14397	0.269755	0.897646	-4.61705
P60709	ACTB	AR02	-0.135996	21.6613	-1.14349	0.269946	0.897735	-4.61731
Q9H4E7	DEF6	AR02	-0.170808	15.373	-1.14071	0.271068	0.900671	-4.61884
O43504	LAMTOR5	AR02	-0.118785	15.8998	-1.14049	0.271159	0.900671	-4.61896
Q92551	IP6K1	AR02	-0.156566	11.7054	-1.1399	0.271396	0.900909	-4.61928
Q16630	CPSF6	AR02	-0.12564	14.4497	-1.13948	0.271567	0.90093	-4.61951
Q8TDJ6	DMXL2	AR02	-0.14508	11.5157	-1.13868	0.271889	0.901339	-4.61995
Q6UWE0	LRSAM1	AR02	-0.133553	11.9478	-1.13775	0.272265	0.901339	-4.62045
P46459	NSF	AR02	0.0859434	16.5049	1.13751	0.272364	0.901339	-4.62059
P21796	VDAC1	AR02	-0.137444	15.2626	-1.13742	0.272399	0.901339	-4.62063
Q9H9H4	VPS37B	AR02	-0.130104	13.9834	-1.1363	0.272853	0.901339	-4.62125
Q9UKA4	AKAP11	AR02	0.29834	14.2176	1.13609	0.272941	0.901339	-4.62136
Q8WVT3	TRAPPC12	AR02	0.122001	12.9911	1.13591	0.273013	0.901339	-4.62146
Q9Y450	HBS1L	AR02	-0.102171	12.708	-1.13588	0.273024	0.901339	-4.62148
P56556	NDUFA6	AR02	0.202914	12.2929	1.1355	0.273178	0.901339	-4.62168
Q99447	PCYT2	AR02	-0.11565	13.1826	-1.13445	0.273605	0.902201	-4.62226
Q8IV08	PLD3	AR02	0.128001	13.378	1.13401	0.273785	0.902251	-4.6225
O43719	HTATSF1	AR02	-0.288343	11.2413	-1.13273	0.274305	0.903419	-4.62319
Q8WZ19	KCTD13	AR02	0.227031	11.9159	1.13212	0.274555	0.903696	-4.62353
Q99808	SLC29A1	AR02	0.465698	13.2674	1.13145	0.274828	0.903988	-4.62389
Q86X76	NIT1	AR02	-0.113968	13.9579	-1.13108	0.27498	0.903988	-4.62409
O95573	ACSL3	AR02	-0.13022	13.1349	-1.13068	0.275141	0.903988	-4.62431
Q6P5R6	RPL22L1	AR02	0.481805	17.8712	1.13005	0.275399	0.904215	-4.62465
O43491	EPB41L2	AR02	0.305987	10.4863	1.12965	0.275564	0.904215	-4.62487
Q13596	SNX1	AR02	-0.15703	14.6276	-1.12923	0.275734	0.904215	-4.6251
Q09028	RBBP4	AR02	0.107749	14.6809	1.12889	0.275873	0.904215	-4.62528
Q13303	KCNAB2	AR02	0.0948441	14.8255	1.12825	0.276135	0.904343	-4.62563
Q96BI1	SLC22A18	AR02	-0.21357	12.1248	-1.12799	0.276244	0.904343	-4.62577
Q8NDA8	MROH1	AR02	0.102973	13.2077	1.12668	0.276779	0.905218	-4.62648
Q7Z4F1	LRP10	AR02	-0.176222	12.3228	-1.12583	0.277127	0.905218	-4.62694
P20138	CD33	AR02	-0.313814	12.8635	-1.12576	0.277158	0.905218	-4.62698
P17301	ITGA2	AR02	0.285882	12.818	1.12562	0.277214	0.905218	-4.62706
Q9NXG0	CNTLN	AR02	0.302641	11.3614	1.12518	0.277396	0.905218	-4.6273
Q8NBU5	ATAD1	AR02	-0.2313	11.3776	-1.12459	0.277639	0.905218	-4.62762
Q6P4E1	GOLM2	AR02	-0.31641	11.6337	-1.12398	0.277889	0.905218	-4.62794
Q9Y296	TRAPPC4	AR02	0.0811481	14.0374	1.12362	0.278036	0.905218	-4.62814
Q8N0W3	FCSK	AR02	-0.243796	11.2453	-1.12362	0.278037	0.905218	-4.62814
Q9UBM7	DHCR7	AR02	-0.156329	13.2547	-1.1233	0.278171	0.905218	-4.62832
Q9P000	COMMD9	AR02	-0.152943	12.5716	-1.12218	0.278632	0.906177	-4.62892
Q53F19	NCBP3	AR02	-0.359486	11.9069	-1.12112	0.279068	0.906388	-4.62949
P82094	TMF1	AR02	0.169837	10.9737	1.12092	0.279151	0.906388	-4.6296
O75792	RNASEH2A	AR02	0.166339	13.6208	1.12081	0.279195	0.906388	-4.62966
Q15750	TAB1	AR02	0.139363	11.2954	1.12002	0.279522	0.906565	-4.63009
Q05639	EEF1A2	AR02	0.0740692	17.7556	1.11988	0.279582	0.906565	-4.63016
Q8TD55	PLEKHO2	AR02	-0.112938	15.3392	-1.11888	0.279994	0.907291	-4.6307
Q9NRG9	AAAS	AR02	0.12104	12.7517	1.11747	0.28058	0.907291	-4.63146
Q96CQ1	SLC25A36	AR02	0.20533	13.7228	1.1162	0.281104	0.907291	-4.63215
P32321	DCTD	AR02	0.222583	10.8339	1.11585	0.28125	0.907291	-4.63233
Q8WWW0	RASSF5	AR02	0.100244	14.3292	1.11564	0.281336	0.907291	-4.63245
Q9BQ70	TCF25	AR02	-0.307132	9.71247	-1.11554	0.281381	0.907291	-4.6325
Q13469	NFATC2	AR02	-0.21028	11.0438	-1.11541	0.281432	0.907291	-4.63257
Q6P9B9	INTS5	AR02	0.107791	12.0235	1.11517	0.281534	0.907291	-4.6327
Q86TU7	SETD3	AR02	0.178056	12.0673	1.1142	0.281935	0.907291	-4.63322
Q8WTR2	DUSP19	AR02	-0.292375	16.1094	-1.114	0.28202	0.907291	-4.63333
Q12904	AIMP1	AR02	-0.120904	13.7881	-1.114	0.28202	0.907291	-4.63333
Q16877	PFKFB4	AR02	0.149288	13.4521	1.11318	0.282361	0.907291	-4.63377
Q8N7R7	CCNYL1	AR02	0.154112	12.8059	1.11256	0.282618	0.907291	-4.6341
Q7Z422	SZRD1	AR02	-0.204755	11.5335	-1.11254	0.282629	0.907291	-4.63412
P51532	SMARCA4	AR02	-0.131798	15.476	-1.11213	0.2828	0.907291	-4.63434
Q6V1X1	DPP8	AR02	0.254239	11.4694	1.11209	0.282814	0.907291	-4.63436
P46108	CRK	AR02	0.151208	13.0564	1.11149	0.283067	0.907291	-4.63468
Q04721	NOTCH2	AR02	-0.148755	11.7512	-1.11106	0.283244	0.907291	-4.63491
P18124	RPL7	AR02	-0.189237	16.1021	-1.11039	0.283526	0.907291	-4.63527
P22695	UQCRC2	AR02	-0.0934712	14.2823	-1.11034	0.283545	0.907291	-4.63529
Q8WVC0	LEO1	AR02	-0.165232	11.4603	-1.10951	0.283893	0.907291	-4.63574
Q13155	AIMP2	AR02	0.121089	13.9894	1.10916	0.284037	0.907291	-4.63593
Q8WU79	SMAP2	AR02	-0.0951964	15.6271	-1.10884	0.28417	0.907291	-4.6361
P52756	RBM5	AR02	-0.14194	11.735	-1.10848	0.284323	0.907291	-4.63629
Q96Q15	SMG1	AR02	-0.101846	13.1682	-1.10823	0.284429	0.907291	-4.63643
P00918	CA2	AR02	0.15693	14.3419	1.10815	0.28446	0.907291	-4.63647
Q9BZG1	RAB34	AR02	0.120685	12.47	1.10773	0.284636	0.907291	-4.63669
O15321	TM9SF1	AR02	0.272226	10.6788	1.10764	0.284674	0.907291	-4.63674
Q9NQ89	C12orf4	AR02	-0.381132	10.8126	-1.10755	0.284713	0.907291	-4.63679
Q5VZF2	MBNL2	AR02	-0.115982	14.6497	-1.10702	0.284933	0.907291	-4.63707
O75586	MED6	AR02	0.406664	10.4352	1.10588	0.285411	0.907291	-4.63768
Q5VTR2	RNF20	AR02	-0.12018	11.6284	-1.10576	0.285463	0.907291	-4.63775
Q969G3	SMARCE1	AR02	-0.213904	12.6993	-1.10504	0.285768	0.907291	-4.63814
P00846	ATP6	AR02	-0.168473	14.7243	-1.1045	0.285992	0.907291	-4.63842
Q7Z3K3	POGZ	AR02	-0.159191	11.8287	-1.10443	0.28602	0.907291	-4.63846
Q9H300	PARL	AR02	-0.281647	11.8505	-1.10426	0.286092	0.907291	-4.63855
P39656	DDOST	AR02	0.13153	16.4962	1.10377	0.286301	0.907291	-4.63881
P62879	GNB2	AR02	-0.201035	16.0276	-1.10291	0.286661	0.907291	-4.63927
Q9NVH6	TMLHE	AR02	-0.184102	11.0185	-1.10282	0.286701	0.907291	-4.63932
P19086	GNAZ	AR02	0.242634	14.9106	1.10274	0.286734	0.907291	-4.63936
Q13233	MAP3K1	AR02	-0.360916	9.73654	-1.10261	0.286787	0.907291	-4.63943
Q6PIJ6	FBXO38	AR02	0.402363	10.5004	1.1026	0.286793	0.907291	-4.63944
Q9NRL3	STRN4	AR02	0.112164	13.0144	1.1015	0.287256	0.907853	-4.64002
O94967	WDR47	AR02	0.165875	12.0546	1.10139	0.287304	0.907853	-4.64008
Q13526	PIN1	AR02	-0.142479	12.4875	-1.09996	0.287906	0.908417	-4.64084
Q8NBJ5	COLGALT1	AR02	0.0992273	13.1999	1.09928	0.288192	0.908417	-4.6412
O15037	KHNYN	AR02	0.140054	13.6751	1.09791	0.288773	0.908417	-4.64193
Q05469	LIPE	AR02	-0.176866	12.3902	-1.09763	0.288891	0.908417	-4.64208
Q9BZ67	FRMD8	AR02	-0.203811	11.647	-1.09684	0.289227	0.908417	-4.6425
P10809	HSPD1	AR02	0.0990613	16.3144	1.09673	0.289273	0.908417	-4.64256
P17480	UBTF	AR02	-0.282171	11.7407	-1.09663	0.289316	0.908417	-4.64261
P0C0L5	C4B	AR02	0.311373	11.8735	1.0964	0.289414	0.908417	-4.64274
O00241	SIRPB1	AR02	0.182028	12.614	1.09588	0.289632	0.908417	-4.64301
P55265	ADAR	AR02	-0.117641	14.0882	-1.09489	0.290053	0.908417	-4.64354
P35125	USP6	AR02	-0.246974	14.0109	-1.0948	0.290091	0.908417	-4.64358
Q8IU60	DCP2	AR02	-0.15701	11.2168	-1.09461	0.290175	0.908417	-4.64369
Q9UPN7	PPP6R1	AR02	-0.127291	14.9366	-1.09428	0.290315	0.908417	-4.64386
Q96TC7	RMDN3	AR02	0.188634	12.8482	1.09426	0.290321	0.908417	-4.64387
P11171	EPB41	AR02	-0.213908	13.856	-1.09383	0.290504	0.908417	-4.6441
Q13510	ASAH1	AR02	0.0898727	15.9972	1.09333	0.290718	0.908417	-4.64436
Q92734	TFG	AR02	-0.11039	13.9147	-1.0926	0.291026	0.908417	-4.64475
Q15813	TBCE	AR02	0.145742	11.6389	1.0924	0.291112	0.908417	-4.64485
Q9H4A4	RNPEP	AR02	0.0912264	16.8569	1.09123	0.291611	0.908417	-4.64547
O95361	TRIM16	AR02	-0.34908	10.1103	-1.0908	0.291795	0.908417	-4.6457
Q9H3K2	GHITM	AR02	0.140793	14.418	1.09002	0.292128	0.908417	-4.64611
Q9P2R7	SUCLA2	AR02	0.0910527	12.8689	1.08982	0.292212	0.908417	-4.64622
Q9UBD5	ORC3	AR02	0.274592	10.3441	1.0895	0.29235	0.908417	-4.64639
Q07866	KLC1	AR02	-0.0825007	14.0323	-1.08815	0.292926	0.908417	-4.6471
Q641Q2	WASHC2A	AR02	-0.138177	12.0528	-1.08813	0.292938	0.908417	-4.64712
O60888	CUTA	AR02	0.133621	16.2209	1.08736	0.293267	0.908417	-4.64752
P51572	BCAP31	AR02	-0.270971	16.5757	-1.08731	0.293286	0.908417	-4.64754
P61006	RAB8A	AR02	0.0958121	15.9744	1.08714	0.29336	0.908417	-4.64764
Q9Y6A9	SPCS1	AR02	-0.343274	11.1893	-1.08692	0.293454	0.908417	-4.64775
Q86X83	COMMD2	AR02	0.266589	13.5788	1.08689	0.293468	0.908417	-4.64777
Q8WZ82	OVCA2	AR02	0.184744	11.6021	1.08647	0.293649	0.908417	-4.64799
O00264	PGRMC1	AR02	0.13384	13.8117	1.08546	0.294081	0.908417	-4.64852
Q9H7C9	AAMDC	AR02	0.148499	13.8663	1.08543	0.294092	0.908417	-4.64854
Q00059	TFAM	AR02	-0.248339	13.7138	-1.08535	0.294126	0.908417	-4.64858
P36969	GPX4	AR02	-0.195033	15.1167	-1.08534	0.294132	0.908417	-4.64859
Q9UNT1	RABL2B	AR02	-0.17608	12.5839	-1.08526	0.294167	0.908417	-4.64863
P49593	PPM1F	AR02	-0.101596	13.8813	-1.08523	0.294181	0.908417	-4.64864
P51858	HDGF	AR02	0.212365	14.9356	1.08502	0.294268	0.908417	-4.64875
Q8WW12	PCNP	AR02	-0.177089	13.6604	-1.08378	0.294803	0.908417	-4.64941
Q15853	USF2	AR02	-0.264591	13.0358	-1.08372	0.294827	0.908417	-4.64944
O75140	DEPDC5	AR02	0.132524	12.351	1.08327	0.295021	0.908417	-4.64967
P51610	HCFC1	AR02	-0.107101	14.666	-1.08261	0.295306	0.908417	-4.65002
Q9NX40	OCIAD1	AR02	0.131193	12.2431	1.08241	0.295392	0.908417	-4.65013
Q92889	ERCC4	AR02	-0.386525	10.1863	-1.08187	0.295623	0.908417	-4.65041
P17987	TCP1	AR02	0.0737688	15.9958	1.08086	0.29606	0.908417	-4.65094
Q04637	EIF4G1	AR02	-0.138888	13.5786	-1.08079	0.296091	0.908417	-4.65098
P50452	SERPINB8	AR02	0.0960849	18.0464	1.08076	0.296103	0.908417	-4.65099
P10398	ARAF	AR02	-0.128166	13.5981	-1.08005	0.296407	0.908417	-4.65136
Q9H0F7	ARL6	AR02	0.321623	9.87771	1.07948	0.296654	0.908417	-4.65166
P17812	CTPS1	AR02	0.100897	13.9868	1.07804	0.297277	0.908417	-4.65242
P45880	VDAC2	AR02	0.150854	15.353	1.07791	0.297333	0.908417	-4.65249
Q14761	PTPRCAP	AR02	0.294377	13.1631	1.07766	0.297442	0.908417	-4.65262
O60218	AKR1B10	AR02	0.181957	11.5528	1.07732	0.297588	0.908417	-4.6528
Q96SW2	CRBN	AR02	0.229267	12.0126	1.07726	0.297614	0.908417	-4.65283
P00156	CYTB	AR02	0.379956	11.8897	1.07723	0.29763	0.908417	-4.65285
Q96S44	TP53RK	AR02	0.150914	13.1997	1.07668	0.297866	0.908417	-4.65313
Q9P2E9	RRBP1	AR02	-0.139743	13.1777	-1.07635	0.298011	0.908417	-4.65331
P45973	CBX5	AR02	0.23282	11.9383	1.07605	0.29814	0.908417	-4.65346
P26583	HMGB2	AR02	-0.342707	19.3765	-1.076	0.298161	0.908417	-4.65349
Q9Y4G6	TLN2	AR02	0.0796132	16.6476	1.07586	0.298221	0.908417	-4.65356
P06865	HEXA	AR02	0.0948316	15.4736	1.0754	0.298421	0.908417	-4.6538
O15231	ZNF185	AR02	-0.122318	12.3459	-1.07478	0.29869	0.908417	-4.65413
Q9UK61	TASOR	AR02	0.254749	10.2084	1.07461	0.298766	0.908417	-4.65422
Q9UKK9	NUDT5	AR02	-0.119159	15.9019	-1.07259	0.299643	0.908417	-4.65527
Q8WUK0	PTPMT1	AR02	-0.250594	11.2781	-1.07195	0.299919	0.908417	-4.6556
A6NCE7	MAP1LC3B2	AR02	0.268631	10.5392	1.071	0.300337	0.908417	-4.6561
Q9UHB7	AFF4	AR02	0.163608	11.7322	1.07071	0.300462	0.908417	-4.65625
O43395	PRPF3	AR02	-0.213993	12.8974	-1.07058	0.30052	0.908417	-4.65632
Q9NZM3	ITSN2	AR02	-0.100177	13.3346	-1.0705	0.300552	0.908417	-4.65636
Q9NWV4	CZIB	AR02	0.139868	14.2181	1.07047	0.300567	0.908417	-4.65638
O60749	SNX2	AR02	-0.0989349	14.1839	-1.07047	0.300568	0.908417	-4.65638
P48426	PIP4K2A	AR02	0.119494	13.6581	1.06991	0.300811	0.908417	-4.65667
Q71F56	MED13L	AR02	-0.333439	11.0469	-1.06988	0.300824	0.908417	-4.65668
P46779	RPL28	AR02	-0.209011	13.7359	-1.06966	0.300921	0.908417	-4.6568
P85037	FOXK1	AR02	-0.25269	12.3134	-1.0692	0.30112	0.908417	-4.65704
P32121	ARRB2	AR02	0.114238	15.8842	1.06892	0.301241	0.908417	-4.65718
Q9NZT2	OGFR	AR02	-0.150982	13.5706	-1.0689	0.301252	0.908417	-4.65719
Q13813	SPTAN1	AR02	-0.109418	16.7989	-1.06818	0.301564	0.908417	-4.65757
Q14699	RFTN1	AR02	-0.325763	9.46832	-1.06814	0.301584	0.908417	-4.65759
P26641	EEF1G	AR02	-0.0941125	16.2752	-1.06811	0.301597	0.908417	-4.65761
Q8IU68	TMC8	AR02	-0.249772	12.9112	-1.06789	0.301692	0.908417	-4.65772
P29590	PML	AR02	-0.110687	14.4805	-1.06785	0.30171	0.908417	-4.65774
Q8N584	TTC39C	AR02	0.131053	11.8298	1.06762	0.301813	0.908417	-4.65786
Q71RG4	TMUB2	AR02	0.214642	10.3335	1.0671	0.302037	0.908417	-4.65813
Q9BXS5	AP1M1	AR02	-0.110574	16.1997	-1.06636	0.302361	0.908417	-4.65851
P78536	ADAM17	AR02	-0.121154	11.7669	-1.06636	0.302363	0.908417	-4.65852
Q86VQ1	GLCCI1	AR02	-0.29054	10.1461	-1.06617	0.302444	0.908417	-4.65861
Q76L83	ASXL2	AR02	0.132924	14.0664	1.06602	0.302509	0.908417	-4.65869
O15431	SLC31A1	AR02	-0.25357	13.3189	-1.06555	0.302716	0.908417	-4.65893
Q00688	FKBP3	AR02	-0.183675	15.1881	-1.0651	0.302912	0.908417	-4.65917
O14745	NHERF1	AR02	-0.11834	14.8011	-1.06445	0.3032	0.908417	-4.65951
Q92685	ALG3	AR02	0.23609	13.261	1.0637	0.303529	0.908417	-4.65989
Q9P1Q0	VPS54	AR02	-0.208573	11.2388	-1.06342	0.303652	0.908417	-4.66004
P46782	RPS5	AR02	-0.207053	14.6471	-1.06338	0.303671	0.908417	-4.66006
Q8NEU8	APPL2	AR02	0.112555	12.9775	1.06324	0.30373	0.908417	-4.66013
Q9NNW7	TXNRD2	AR02	-0.158307	11.7485	-1.06316	0.303764	0.908417	-4.66017
P08579	SNRPB2	AR02	0.204405	14.3316	1.06254	0.304037	0.908417	-4.66049
Q96L91	EP400	AR02	-0.0994469	15.8202	-1.06244	0.304083	0.908417	-4.66055
P33241	LSP1	AR02	-0.234475	17.2719	-1.06179	0.304367	0.908417	-4.66088
Q9H7L9	SUDS3	AR02	-0.198399	13.1274	-1.06174	0.304389	0.908417	-4.66091
P24844	MYL9	AR02	0.186739	13.7934	1.06169	0.304413	0.908417	-4.66094
Q9Y2I8	WDR37	AR02	-0.134461	13.1374	-1.06156	0.304471	0.908417	-4.661
Q6ZSR9		AR02	-0.123645	13.1894	-1.06073	0.304836	0.909008	-4.66143
P23634	ATP2B4	AR02	-0.101791	14.9746	-1.0593	0.305466	0.91039	-4.66217
P55196	AFDN	AR02	0.3202	10.0804	1.0578	0.306127	0.911862	-4.66295
Q15027	ACAP1	AR02	-0.120148	15.1578	-1.05677	0.306585	0.912301	-4.66348
Q70E73	RAPH1	AR02	0.174932	13.0763	1.05647	0.306717	0.912301	-4.66363
Q8TCF1	ZFAND1	AR02	0.25793	9.77703	1.05633	0.306777	0.912301	-4.6637
Q9Y305	ACOT9	AR02	0.1153	13.6953	1.0557	0.307057	0.912638	-4.66403
B0I1T2	MYO1G	AR02	-0.0918212	15.6915	-1.05475	0.30748	0.913396	-4.66452
Q06481	APLP2	AR02	0.179614	11.1999	1.05398	0.307818	0.913457	-4.66491
Q01780	EXOSC10	AR02	0.160236	11.5297	1.05395	0.307835	0.913457	-4.66493
P18887	XRCC1	AR02	0.098882	12.8241	1.0534	0.30808	0.913685	-4.66522
O00757	FBP2	AR02	0.209675	14.5301	1.05251	0.308474	0.914357	-4.66567
Q96JZ2	HSH2D	AR02	0.210941	12.9162	1.05177	0.308802	0.914833	-4.66605
Q13131	PRKAA1	AR02	-0.11994	13.7185	-1.05097	0.309158	0.915049	-4.66646
Q6P1L8	MRPL14	AR02	0.276739	10.1338	1.05085	0.309211	0.915049	-4.66652
Q8NB66	UNC13C	AR02	-0.3705	15.2763	-1.05006	0.309561	0.915589	-4.66693
Q9BR76	CORO1B	AR02	-0.0787405	14.7774	-1.04894	0.310061	0.916569	-4.6675
Q9NRW3	APOBEC3C	AR02	0.15841	10.6915	1.04766	0.310635	0.917707	-4.66816
Q14644	RASA3	AR02	-0.179092	12.3832	-1.04708	0.310894	0.917707	-4.66846
O75113	N4BP1	AR02	-0.090312	12.9601	-1.04695	0.31095	0.917707	-4.66852
O75030	MITF	AR02	0.295668	14.4951	1.04604	0.31136	0.917776	-4.66899
A0AVT1	UBA6	AR02	-0.0804905	14.6623	-1.04558	0.311564	0.917776	-4.66922
Q9UBS0	RPS6KB2	AR02	-0.165166	11.8274	-1.04542	0.311634	0.917776	-4.6693
Q5W0Z9	ZDHHC20	AR02	-0.449238	10.7441	-1.0454	0.311647	0.917776	-4.66932
P50226	SULT1A2	AR02	0.130643	14.5573	1.04412	0.312217	0.918959	-4.66997
P29401	TKT	AR02	-0.114695	19.8761	-1.04323	0.312619	0.919645	-4.67043
Q8NEN9	PDZD8	AR02	0.158148	12.4146	1.04281	0.312804	0.919695	-4.67064
Q9NV70	EXOC1	AR02	0.105228	13.535	1.04221	0.313074	0.919942	-4.67094
Q8NFQ8	TOR1AIP2	AR02	0.163759	11.8263	1.04188	0.313226	0.919942	-4.67112
Q13435	SF3B2	AR02	-0.080069	15.3708	-1.04082	0.313702	0.92028	-4.67166
P21912	SDHB	AR02	-0.113542	14.7335	-1.04072	0.313746	0.92028	-4.67171
P31146	CORO1A	AR02	-0.0877182	19.7857	-1.03999	0.314073	0.92028	-4.67208
P54819	AK2	AR02	0.109449	16.6964	1.03966	0.314221	0.92028	-4.67224
P61626	LYZ	AR02	-0.161655	21.1415	-1.03945	0.314316	0.92028	-4.67235
P11277	SPTB	AR02	0.266159	13.4637	1.03937	0.314353	0.92028	-4.67239
Q5RKV6	EXOSC6	AR02	0.131881	13.256	1.03857	0.314712	0.920837	-4.6728
P05771	PRKCB	AR02	0.101199	15.1111	1.03715	0.315353	0.922218	-4.67352
P13164	IFITM1	AR02	-0.571289	14.5185	-1.03647	0.31566	0.922222	-4.67387
O95716	RAB3D	AR02	0.160543	15.5067	1.0364	0.315693	0.922222	-4.6739
Q9HBG6	IFT122	AR02	-0.351944	13.7036	-1.03498	0.316337	0.923021	-4.67462
P62280	RPS11	AR02	-0.258007	15.3967	-1.03486	0.31639	0.923021	-4.67468
Q02543	RPL18A	AR02	-0.122076	15.318	-1.0335	0.317007	0.923021	-4.67537
P40123	CAP2	AR02	0.31895	18.6053	1.03336	0.317068	0.923021	-4.67544
P00450	CP	AR02	-0.155066	11.2165	-1.03334	0.317078	0.923021	-4.67545
Q8NEY1	NAV1	AR02	0.212645	11.6809	1.03328	0.317104	0.923021	-4.67548
P49748	ACADVL	AR02	0.0897392	14.8713	1.03315	0.317165	0.923021	-4.67555
Q8N2K0	ABHD12	AR02	0.276574	11.6588	1.03281	0.31732	0.923021	-4.67572
Q9HC07	TMEM165	AR02	-0.319924	11.1452	-1.03227	0.317565	0.923239	-4.676
Q9Y295	DRG1	AR02	-0.0992677	13.884	-1.0311	0.318096	0.924293	-4.67659
Q9H270	VPS11	AR02	-0.108637	13.7195	-1.03049	0.31837	0.924523	-4.67689
P23610	F8A1	AR02	-0.197962	12.0017	-1.03018	0.318515	0.924523	-4.67705
Q58FG1		AR02	-0.178117	15.8409	-1.02976	0.318703	0.924578	-4.67726
Q9H2W6	MRPL46	AR02	-0.186411	11.2399	-1.02938	0.318875	0.924586	-4.67745
Q99848	EBNA1BP2	AR02	0.49798	10.2657	1.02874	0.319171	0.924826	-4.67778
Q96FZ2	HMCES	AR02	0.183226	10.1217	1.02843	0.319308	0.924826	-4.67793
P48960	ADGRE5	AR02	-0.114483	14.6392	-1.02783	0.319582	0.924826	-4.67824
Q8NF50	DOCK8	AR02	-0.0876887	15.3024	-1.02771	0.319636	0.924826	-4.6783
Q96TA1	NIBAN2	AR02	-0.24813	10.0695	-1.02697	0.319974	0.925312	-4.67867
Q9H3P7	ACBD3	AR02	-0.100481	12.6541	-1.0263	0.32028	0.925705	-4.67901
P35611	ADD1	AR02	-0.102826	15.3312	-1.02587	0.320476	0.925781	-4.67922
Q9H6D7	HAUS4	AR02	0.177204	11.4103	1.02387	0.32139	0.927931	-4.68023
Q9NSV4	DIAPH3	AR02	-0.318619	13.0734	-1.02261	0.321967	0.928622	-4.68086
P05107	ITGB2	AR02	-0.103486	19.2623	-1.02261	0.32197	0.928622	-4.68087
O43324	EEF1E1	AR02	0.0939725	13.5944	1.02198	0.322258	0.928961	-4.68118
Q92733	PRCC	AR02	-0.204318	10.8279	-1.02102	0.322699	0.929052	-4.68166
P08519		AR02	0.278792	10.3235	1.02057	0.322904	0.929052	-4.68189
Q96I24	FUBP3	AR02	-0.128992	12.9397	-1.01992	0.323203	0.929052	-4.68221
P42356	PI4KA	AR02	0.0875637	18.5524	1.01964	0.323331	0.929052	-4.68235
Q9H6V9	LDAH	AR02	0.122191	12.9274	1.01947	0.323413	0.929052	-4.68244
Q9H3N1	TMX1	AR02	-0.142788	14.5557	-1.0191	0.323579	0.929052	-4.68262
Q96AY2	EME1	AR02	-0.325309	13.7155	-1.01882	0.323711	0.929052	-4.68277
Q96Q05	TRAPPC9	AR02	-0.0916345	14.5499	-1.01836	0.323923	0.929052	-4.683
P02748	C9	AR02	0.332169	11.6056	1.01623	0.324905	0.929052	-4.68406
Q9BV44	THUMPD3	AR02	0.181478	11.1576	1.01605	0.324988	0.929052	-4.68415
Q9Y5K8	ATP6V1D	AR02	-0.221413	12.7824	-1.01599	0.325014	0.929052	-4.68418
Q8N6S5	ARL6IP6	AR02	-0.280642	12.2267	-1.0156	0.325192	0.929052	-4.68437
Q9BZV1	UBXN6	AR02	-0.186035	12.7031	-1.01511	0.325421	0.929052	-4.68462
Q02446	SP4	AR02	-0.236211	9.87525	-1.01429	0.325799	0.929052	-4.68503
P50897	PPT1	AR02	-0.225511	10.1898	-1.01415	0.325862	0.929052	-4.6851
O95219	SNX4	AR02	-0.202428	11.9652	-1.01406	0.325904	0.929052	-4.68514
P06132	UROD	AR02	-0.171983	12.5364	-1.01373	0.326057	0.929052	-4.68531
P23458	JAK1	AR02	-0.0801741	16.3411	-1.01325	0.326282	0.929052	-4.68555
O15066	KIF3B	AR02	-0.288338	13.4367	-1.01297	0.326411	0.929052	-4.68569
Q6IA86	ELP2	AR02	-0.196859	11.065	-1.01289	0.326449	0.929052	-4.68573
Q9GZT3	SLIRP	AR02	-0.131289	12.4646	-1.01284	0.326469	0.929052	-4.68575
Q92538	GBF1	AR02	0.104818	12.9449	1.01246	0.326647	0.929052	-4.68595
Q8IWE5	PLEKHM2	AR02	-0.141156	11.5439	-1.01245	0.326649	0.929052	-4.68595
O75533	SF3B1	AR02	-0.0993672	15.3377	-1.01233	0.326705	0.929052	-4.68601
Q9H0S4	DDX47	AR02	0.435794	10.6272	1.01195	0.326881	0.929052	-4.6862
Q15021	NCAPD2	AR02	0.0913149	13.6658	1.0113	0.327182	0.929052	-4.68652
Q7Z2Z2	EFL1	AR02	-0.10617	12.8672	-1.01079	0.327422	0.929052	-4.68678
Q04864	REL	AR02	-0.0858494	13.9094	-1.01062	0.327497	0.929052	-4.68686
Q9NRF8	CTPS2	AR02	0.0871441	13.9148	1.01048	0.327564	0.929052	-4.68693
Q9NRA8	EIF4ENIF1	AR02	-0.250846	11.1703	-1.01023	0.327681	0.929052	-4.68706
Q99832	CCT7	AR02	-0.0838628	15.5296	-1.00934	0.328095	0.929052	-4.6875
P01008	SERPINC1	AR02	0.190621	15.4313	1.00916	0.328178	0.929052	-4.68759
Q7LBR1	CHMP1B	AR02	-0.247278	15.8031	-1.00908	0.328212	0.929052	-4.68762
P31948	STIP1	AR02	0.0810274	16.7871	1.00832	0.328565	0.929052	-4.688
Q9BTT4	MED10	AR02	-0.367393	9.61481	-1.00826	0.328596	0.929052	-4.68803
O95164	UBL3	AR02	-0.258155	11.5337	-1.00804	0.328699	0.929052	-4.68814
Q14849	STARD3	AR02	-0.129529	12.2902	-1.00762	0.328895	0.929052	-4.68835
P62753	RPS6	AR02	-0.208088	17.0753	-1.00736	0.329015	0.929052	-4.68848
P63220	RPS21	AR02	0.1378	15.9183	1.00726	0.329059	0.929052	-4.68853
Q9H4A6	GOLPH3	AR02	-0.35009	11.685	-1.00717	0.329103	0.929052	-4.68857
Q6ZWT7	MBOAT2	AR02	-0.110018	14.0906	-1.00647	0.329426	0.929484	-4.68892
Q9H5X1	CIAO2A	AR02	0.105658	12.9561	1.00591	0.329689	0.929526	-4.6892
P55884	EIF3B	AR02	-0.117575	15.053	-1.00563	0.32982	0.929526	-4.68934
Q13505	MTX1	AR02	-0.189308	10.9903	-1.00473	0.330239	0.929526	-4.68978
Q9BV86	NTMT1	AR02	-0.277607	10.422	-1.00471	0.330249	0.929526	-4.68979
Q9HA64	FN3KRP	AR02	-0.172738	14.2388	-1.0043	0.330441	0.929526	-4.69
Q6IQ22	RAB12	AR02	-0.252985	9.90706	-1.00425	0.330464	0.929526	-4.69002
P04066	FUCA1	AR02	0.12446	14.6237	1.00309	0.331005	0.92987	-4.69059
P35610	SOAT1	AR02	-0.262604	10.9034	-1.00292	0.331087	0.92987	-4.69068
A6NC98	CCDC88B	AR02	-0.114258	14.8858	-1.0025	0.331281	0.92987	-4.69088
Q8TEM1	NUP210	AR02	0.0823518	14.1339	1.0021	0.331468	0.92987	-4.69108
Q8IUX4	APOBEC3F	AR02	0.198805	10.0164	1.00183	0.331593	0.92987	-4.69121
Q9Y314	NOSIP	AR02	-0.176006	11.887	-1.0018	0.331609	0.92987	-4.69123
Q9NXV6	CDKN2AIP	AR02	-0.0882145	12.8874	-1.001	0.331984	0.930016	-4.69163
Q96QT4	TRPM7	AR02	0.212252	14.2112	1.00072	0.332114	0.930016	-4.69176
Q9H008	LHPP	AR02	0.163545	14.1816	1.0006	0.332173	0.930016	-4.69183
Q13356	PPIL2	AR02	-0.208857	11.7815	-0.999594	0.332643	0.930855	-4.69232
Q9NR12	PDLIM7	AR02	-0.150982	16.2038	-0.998691	0.333067	0.931088	-4.69277
O43252	PAPSS1	AR02	0.127619	13.5547	0.998689	0.333068	0.931088	-4.69277
P0DME0	SETSIP	AR02	-0.31889	10.9451	-0.997647	0.333557	0.931109	-4.69328
P33527	ABCC1	AR02	0.089298	16.8772	0.997176	0.333779	0.931109	-4.69351
Q9UMS0	NFU1	AR02	-0.108184	12.2516	-0.996904	0.333907	0.931109	-4.69364
Q9Y6Y8	SEC23IP	AR02	-0.128197	12.7581	-0.99662	0.334041	0.931109	-4.69378
P12268	IMPDH2	AR02	-0.0921311	15.796	-0.996528	0.334084	0.931109	-4.69383
Q9H2P0	ADNP	AR02	-0.231648	10.2086	-0.996494	0.3341	0.931109	-4.69385
P27797	CALR	AR02	0.141588	16.9912	0.995598	0.334522	0.931808	-4.69429
Q8WXF0	SRSF12	AR02	0.159925	12.5922	0.994171	0.335194	0.933205	-4.69499
Q9NR28	DIABLO	AR02	-0.0848494	13.0323	-0.993553	0.335486	0.933541	-4.69529
P34913	EPHX2	AR02	-0.281082	11.8547	-0.992204	0.336123	0.934574	-4.69595
O95218	ZRANB2	AR02	-0.107241	12.8012	-0.992041	0.3362	0.934574	-4.69603
Q9P2A4	ABI3	AR02	-0.227668	10.4652	-0.990881	0.336749	0.935623	-4.6966
Q9UBF8	PI4KB	AR02	0.173064	10.7603	0.989547	0.33738	0.936242	-4.69725
A1L390	PLEKHG3	AR02	-0.115044	12.5332	-0.989242	0.337525	0.936242	-4.6974
Q9HD15	SRA1	AR02	-0.105892	13.9991	-0.98911	0.337587	0.936242	-4.69747
P19971	TYMP	AR02	0.102056	16.1669	0.988961	0.337658	0.936242	-4.69754
Q9BXP2	SLC12A9	AR02	0.0959686	12.711	0.988431	0.33791	0.936463	-4.6978
Q9H6U8	ALG9	AR02	0.26119	11.7323	0.987609	0.338299	0.936673	-4.6982
Q7Z4Q2	HEATR3	AR02	-0.312737	10.1307	-0.987399	0.338399	0.936673	-4.6983
Q96IU4	ABHD14B	AR02	-0.184962	15.4654	-0.987186	0.338501	0.936673	-4.69841
P50995	ANXA11	AR02	0.108258	18.1048	0.986687	0.338737	0.936853	-4.69865
Q15459	SF3A1	AR02	-0.0849463	14.3357	-0.985805	0.339157	0.937537	-4.69908
Q5UCC4	EMC10	AR02	0.291999	11.5592	0.984973	0.339552	0.938155	-4.69948
O95985	TOP3B	AR02	0.139335	11.632	0.984189	0.339926	0.938712	-4.69987
P11387	TOP1	AR02	0.135979	14.2275	0.982615	0.340676	0.939278	-4.70063
P60763	RAC3	AR02	0.18705	11.6694	0.982036	0.340953	0.939278	-4.70091
Q86VI3	IQGAP3	AR02	-0.336	11.7859	-0.981942	0.340997	0.939278	-4.70096
P62834	RAP1A	AR02	-0.224178	15.3723	-0.981541	0.341189	0.939278	-4.70115
O43760	SYNGR2	AR02	0.133102	16.62	0.981472	0.341222	0.939278	-4.70119
Q96IV0	NGLY1	AR02	0.104569	13.1026	0.981253	0.341326	0.939278	-4.70129
Q9BVL2	NUP58	AR02	-0.116635	13.2268	-0.981232	0.341337	0.939278	-4.7013
O60333	KIF1B	AR02	0.155986	13.6849	0.980401	0.341734	0.939513	-4.70171
P51688	SGSH	AR02	0.234772	10.6221	0.980333	0.341766	0.939513	-4.70174
P19388	POLR2E	AR02	0.115395	11.8539	0.97943	0.342198	0.940118	-4.70218
P37840	SNCA	AR02	0.200123	12.523	0.979153	0.342331	0.940118	-4.70231
Q15643	TRIP11	AR02	-0.160255	11.3767	-0.978086	0.342842	0.940579	-4.70283
Q8WWM7	ATXN2L	AR02	-0.110207	11.859	-0.977943	0.342911	0.940579	-4.7029
Q92785	DPF2	AR02	-0.115803	12.6556	-0.977509	0.343119	0.940579	-4.70311
Q86U90	YRDC	AR02	0.192483	10.3093	0.977362	0.343189	0.940579	-4.70318
P61247	RPS3A	AR02	0.102965	15.4031	0.976817	0.343451	0.940823	-4.70344
Q6PJ69	TRIM65	AR02	-0.197549	11.138	-0.976303	0.343697	0.940916	-4.70369
Q9NP61	ARFGAP3	AR02	0.119166	12.4454	0.976028	0.343829	0.940916	-4.70383
Q8WXA9	SREK1	AR02	-0.180498	11.6595	-0.974791	0.344424	0.941062	-4.70442
O15527	OGG1	AR02	-0.227295	11.3507	-0.973522	0.345034	0.941062	-4.70504
P14868	DARS1	AR02	-0.100057	16.4393	-0.972875	0.345346	0.941062	-4.70535
P0C0L4	C4A	AR02	-0.304418	12.2825	-0.971573	0.345973	0.941062	-4.70598
Q9Y2T2	AP3M1	AR02	-0.112058	13.4968	-0.97111	0.346197	0.941062	-4.7062
Q5TC84	OGFRL1	AR02	-0.151027	13.2512	-0.971014	0.346243	0.941062	-4.70624
[truncated: 3,455 more rows]

## Sheet: PMA
accession	gene_symbol	coef	logFC	AveExpr	t	P.Value	adj.P.Val	B
P02787	TF	PMA	-1.15343	13.8059	-7.37482	1.7416e-06	0.00949869	5.11722
P01033	TIMP1	PMA	-1.13674	13.4536	-6.87614	4.09316e-06	0.0111621	4.37765
P02647	APOA1	PMA	-1.32253	12.8799	-6.57581	6.96025e-06	0.0126537	3.9124
Q9P1F3	ABRACL	PMA	-1.26696	15.0798	-5.86614	2.56317e-05	0.0232438	2.75357
Q9H7P6	MVB12B	PMA	-0.852023	10.6043	-5.80106	2.89858e-05	0.0232438	2.64318
P10124	SRGN	PMA	-2.12602	16.1167	-5.7065	3.46921e-05	0.0232438	2.48156
P09486	SPARC	PMA	-1.09761	12.6979	-5.65726	3.8113e-05	0.0232438	2.39684
Q96TA2	YME1L1	PMA	-2.17818	13.926	-5.61833	4.10637e-05	0.0232438	2.32961
P05155	SERPING1	PMA	-0.798503	11.4588	-5.58012	4.41911e-05	0.0232438	2.26337
P01857		PMA	-1.1408	16.0012	-5.54482	4.7299e-05	0.0232438	2.20198
P68871	HBB	PMA	1.36349	15.5281	5.5401	4.7732e-05	0.0232438	2.19375
P36406	TRIM23	PMA	0.575398	14.3881	5.4908	5.25011e-05	0.0232438	2.10766
Q6JBY9	RCSD1	PMA	-0.889619	14.776	-5.46302	5.54034e-05	0.0232438	2.05898
Q86T03	PIP4P1	PMA	-0.57905	13.6479	-5.33922	7.04987e-05	0.0272183	1.84064
P01034	CST3	PMA	-0.977737	11.7696	-5.26603	8.13662e-05	0.0272183	1.71048
P01876		PMA	-1.31428	12.6536	-5.2479	8.43176e-05	0.0272183	1.67811
P02679	FGG	PMA	-1.04353	14.5423	-5.22337	8.84859e-05	0.0272183	1.63425
Q03001	DST	PMA	0.423306	15.0117	5.21572	8.98295e-05	0.0272183	1.62055
Q9Y6A4	CFAP20	PMA	0.63789	12.9537	5.10517	0.000111765	0.0303805	1.42169
P49641	MAN2A2	PMA	0.560739	13.6113	5.09802	0.00011336	0.0303805	1.40877
Q9BTE7	DCUN1D5	PMA	0.833261	10.5042	5.0822	0.000116977	0.0303805	1.38016
P16035	TIMP2	PMA	-1.31215	12.0163	-4.90506	0.000166593	0.0402539	1.05747
Q9Y4F9	RIPOR2	PMA	-0.826617	13.6424	-4.89569	0.000169754	0.0402539	1.04029
Q6IQ23	PLEKHA7	PMA	0.684858	12.6885	4.86798	0.000179472	0.0407851	0.989394
Q6Y7W6	GIGYF2	PMA	-0.579835	12.265	-4.83376	0.000192263	0.0419442	0.926432
Q9Y2K2	SIK3	PMA	-0.748522	12.6629	-4.74077	0.000231975	0.0477835	0.754569
Q9NQC3	RTN4	PMA	-0.645072	18.2761	-4.73111	0.000236552	0.0477835	0.736673
P02749	APOH	PMA	0.707153	13.1949	4.70725	0.000248274	0.0478876	0.692367
P0DOX7		PMA	-0.881618	13.5384	-4.69478	0.000254628	0.0478876	0.669211
O00391	QSOX1	PMA	-0.475359	16.8503	-4.47284	0.000400401	0.0727928	0.253921
Q02094	RHAG	PMA	1.11855	14.1213	4.43436	0.000433297	0.0762324	0.181393
Q86X52	CHSY1	PMA	-0.568836	11.6615	-4.4029	0.000462233	0.0787819	0.121996
Q9BXB7	SPATA16	PMA	1.49307	15.8671	4.32452	0.000543199	0.0890101	-0.0263638
Q96FF9	CDCA5	PMA	0.47086	17.7588	4.3142	0.000554885	0.0890101	-0.0459345
Q6ZMK1	ZFTRAF1	PMA	0.386121	15.178	4.29875	0.000572858	0.0892677	-0.0752452
O75019	LILRA1	PMA	-0.557405	16.1178	-4.24654	0.000638126	0.0966761	-0.174476
Q9Y3C8	UFC1	PMA	-0.384116	15.3514	-4.1921	0.000714267	0.105287	-0.27817
Q13946	PDE7A	PMA	0.836512	11.5868	4.11718	0.000834372	0.119754	-0.42118
Q14573	ITPR3	PMA	0.334744	15.8699	4.03195	0.000996204	0.132675	-0.584326
Q08257	CRYZ	PMA	0.380087	12.8001	4.03125	0.000997645	0.132675	-0.585656
Q76FK4	NOL8	PMA	0.634088	12.6461	4.00146	0.00106152	0.132675	-0.642773
P51553	IDH3G	PMA	0.646087	12.8167	3.99268	0.00108111	0.132675	-0.65961
P28676	GCA	PMA	0.424974	20.4403	3.99206	0.00108252	0.132675	-0.660803
Q15223	NECTIN1	PMA	-0.899068	10.7083	-3.98986	0.0010875	0.132675	-0.665031
P62942	FKBP1A	PMA	0.383783	15.8274	3.97567	0.00112016	0.132675	-0.692261
Q02539	H1-1	PMA	-1.15586	16.0319	-3.96789	0.00113846	0.132675	-0.707182
P54108	CRISP3	PMA	-1.76757	11.6728	-3.96189	0.00115281	0.132675	-0.718707
Q14696	MESD	PMA	-0.532717	12.6572	-3.95575	0.00116765	0.132675	-0.730483
Q9HAV7	GRPEL1	PMA	0.826876	11.3647	3.90938	0.00128633	0.143177	-0.819572
Q8TAQ5	ZNF420	PMA	-0.429458	16.7845	-3.8791	0.0013703	0.148442	-0.877766
O75582	RPS6KA5	PMA	-0.414393	13.0144	-3.86199	0.00142018	0.148442	-0.910671
P35251	RFC1	PMA	0.513655	11.3283	3.85956	0.00142742	0.148442	-0.915347
Q9Y5L4	TIMM13	PMA	0.293981	14.1561	3.85453	0.0014425	0.148442	-0.925022
Q7Z6J0	SH3RF1	PMA	0.687142	11.5133	3.82408	0.00153733	0.150733	-0.983605
Q8WVC6	DCAKD	PMA	-0.361435	15.4806	-3.80346	0.0016051	0.150733	-1.0233
P50897	PPT1	PMA	-0.84544	10.1898	-3.80207	0.00160978	0.150733	-1.02598
P54840	GYS2	PMA	0.385636	15.7114	3.80103	0.00161326	0.150733	-1.02796
Q8IV50	LYSMD2	PMA	0.573926	12.5742	3.79303	0.00164051	0.150733	-1.04337
P16150	SPN	PMA	-0.39449	14.6759	-3.78414	0.00167132	0.150733	-1.06049
Q5VYY1	ANKRD22	PMA	0.314647	14.6082	3.78257	0.00167681	0.150733	-1.06351
Q00526	CDK3	PMA	1.56306	12.1313	3.77986	0.00168635	0.150733	-1.06873
Q8IVV7	GID4	PMA	-0.914887	10.6855	-3.77222	0.0017135	0.150733	-1.08342
Q96GE4	CEP95	PMA	0.588946	19.1903	3.75962	0.0017593	0.152305	-1.10769
Q86XX4	FRAS1	PMA	1.26987	12.4495	3.75197	0.00178771	0.152346	-1.12242
P00568	AK1	PMA	0.761852	12.5883	3.72338	0.00189802	0.159258	-1.17749
P07996	THBS1	PMA	-0.584229	16.0538	-3.70758	0.00196184	0.162119	-1.2079
P0DME0	SETSIP	PMA	-1.17754	10.9451	-3.68394	0.00206147	0.16781	-1.25346
O00487	PSMD14	PMA	0.311363	13.8835	3.66428	0.00214816	0.172295	-1.29133
Q9NP73	ALG13	PMA	0.7143	14.5165	3.64598	0.00223209	0.17558	-1.32656
P61221	ABCE1	PMA	0.350674	12.9788	3.63597	0.00227944	0.17558	-1.34585
Q9H3M7	TXNIP	PMA	-0.356784	14.1747	-3.6332	0.00229269	0.17558	-1.35118
P05067	APP	PMA	-0.624603	12.8431	-3.62798	0.00231789	0.17558	-1.36123
Q8TEP8	CEP192	PMA	0.470959	18.4416	3.59922	0.00246191	0.18185	-1.41663
P48730	CSNK1D	PMA	-0.340461	12.2927	-3.59817	0.00246735	0.18185	-1.41865
Q9UPZ9	CILK1	PMA	-0.51404	12.3623	-3.56972	0.00261894	0.185829	-1.47343
C9JRZ8	AKR1B15	PMA	1.15343	11.8104	3.56515	0.00264414	0.185829	-1.48223
P32119	PRDX2	PMA	0.623336	16.7367	3.56384	0.0026514	0.185829	-1.48475
Q14686	NCOA6	PMA	-0.528064	11.6378	-3.56273	0.00265762	0.185829	-1.4869
Q8N8R5	C2orf69	PMA	0.670123	11.4045	3.54628	0.00275086	0.188845	-1.51857
P0CG04		PMA	-1.18047	12.693	-3.5364	0.00280838	0.188845	-1.53757
Q9Y2H6	FNDC3A	PMA	-0.540654	10.3697	-3.53022	0.00284501	0.188845	-1.54947
P04062	GBA1	PMA	-0.460602	13.0709	-3.5234	0.002886	0.188845	-1.5626
P45880	VDAC2	PMA	0.492226	15.353	3.51716	0.00292397	0.188845	-1.5746
O00629	KPNA4	PMA	0.572119	12.7891	3.51694	0.00292532	0.188845	-1.57503
Q8N6R0	METTL13	PMA	0.427955	10.6062	3.51404	0.00294314	0.188845	-1.5806
P17152	TMEM11	PMA	0.67987	11.7995	3.47922	0.00316599	0.197905	-1.6476
Q8N1I0	DOCK4	PMA	0.481688	15.6999	3.47149	0.0032177	0.197905	-1.66246
Q99729	HNRNPAB	PMA	0.3399	14.804	3.46966	0.00323001	0.197905	-1.66597
P01009	SERPINA1	PMA	-0.480026	18.2443	-3.46699	0.00324818	0.197905	-1.67111
P02042	HBD	PMA	0.616694	20.7467	3.46441	0.00326576	0.197905	-1.67606
P35609	ACTN2	PMA	-1.03417	13.2672	-3.44971	0.00336794	0.199139	-1.70433
Q92478	CLEC2B	PMA	-0.721873	12.4125	-3.44197	0.003423	0.199139	-1.7192
P49321	NASP	PMA	0.477364	13.125	3.44144	0.00342681	0.199139	-1.72022
P01834		PMA	-0.453447	14.0993	-3.43395	0.00348101	0.199139	-1.73462
O15541	RNF113A	PMA	0.55012	10.5793	3.40774	0.00367748	0.199139	-1.78496
Q9H3H3	C11orf68	PMA	-0.325817	14.2124	-3.40624	0.00368902	0.199139	-1.78783
P02100	HBE1	PMA	0.742139	12.2428	3.40245	0.00371844	0.199139	-1.79512
Q96BS2	TESC	PMA	-0.600798	12.1066	-3.38867	0.00382731	0.199139	-1.82157
Q9BQE5	APOL2	PMA	-0.873015	9.5651	-3.38729	0.00383842	0.199139	-1.82422
P50613	CDK7	PMA	-0.632266	11.1697	-3.38417	0.00386358	0.199139	-1.83021
Q86W56	BPHL	PMA	0.401242	11.5532	3.38366	0.00386767	0.199139	-1.83118
Q9NQL2	RRAGD	PMA	-0.297498	13.8905	-3.37849	0.00390977	0.199139	-1.8411
Q10570	CPSF1	PMA	0.290865	13.5738	3.37445	0.00394303	0.199139	-1.84886
Q9UK45	LSM7	PMA	0.879583	14.5414	3.36756	0.00400032	0.199139	-1.86208
Q9NUP1	BLOC1S4	PMA	0.638395	12.8207	3.36578	0.00401518	0.199139	-1.86548
P10768	ESD	PMA	-0.253212	16.5899	-3.36355	0.004034	0.199139	-1.86976
Q9NSC2	SALL1	PMA	0.71546	16.9137	3.36299	0.00403873	0.199139	-1.87083
P38919	EIF4A3	PMA	0.254294	15.3237	3.35908	0.0040719	0.199139	-1.87833
P22694	PRKACB	PMA	0.906497	12.1047	3.35201	0.00413268	0.199139	-1.8919
Q5TFQ8	SIRPB1	PMA	-0.850121	10.0686	-3.35112	0.00414031	0.199139	-1.89359
Q5TCQ9	MAGI3	PMA	-0.446234	13.3765	-3.35061	0.00414476	0.199139	-1.89457
Q9H7B2	RPF2	PMA	0.700403	9.86452	3.34775	0.00416963	0.199139	-1.90005
Q3SXM5	HSDL1	PMA	0.655896	10.4929	3.34707	0.00417563	0.199139	-1.90137
Q8N668	COMMD1	PMA	-0.465421	12.4488	-3.34696	0.00417653	0.199139	-1.90157
Q13627	DYRK1A	PMA	-0.443324	12.267	-3.34441	0.00419893	0.199139	-1.90647
O43805	SSNA1	PMA	0.712633	10.3502	3.33832	0.00425275	0.199952	-1.91813
O75787	ATP6AP2	PMA	-0.302485	14.5545	-3.32952	0.00433179	0.200192	-1.93499
Q13362	PPP2R5C	PMA	0.328565	12.9666	3.32679	0.00435665	0.200192	-1.94023
P16157	ANK1	PMA	0.776675	14.5944	3.32451	0.00437747	0.200192	-1.9446
Q9NW82	WDR70	PMA	0.440409	13.0095	3.31897	0.00442851	0.200192	-1.95521
P69905	HBA1	PMA	0.619686	20.9344	3.31758	0.00444137	0.200192	-1.95787
P62714	PPP2CB	PMA	-0.489738	16.747	-3.30436	0.00456591	0.202926	-1.98318
Q4FZB7	KMT5B	PMA	1.0779	13.1374	3.30326	0.00457643	0.202926	-1.98529
Q9NVI1	FANCI	PMA	0.604643	14.2954	3.29859	0.0046214	0.203267	-1.99423
Q13137	CALCOCO2	PMA	-0.436241	11.9176	-3.29021	0.00470309	0.205141	-2.01027
P36955	SERPINF1	PMA	0.591887	13.7812	3.28621	0.00474254	0.205141	-2.01791
B2RTY4	MYO9A	PMA	0.763161	12.6516	3.27931	0.00481148	0.205141	-2.03112
P62195	PSMC5	PMA	0.225099	14.1443	3.27901	0.00481446	0.205141	-2.03168
P50914	RPL14	PMA	0.380591	15.3871	3.2677	0.00492974	0.208425	-2.05332
P01861		PMA	-1.39874	12.3323	-3.25631	0.00504845	0.209352	-2.07509
P11586	MTHFD1	PMA	0.291042	16.3273	3.2545	0.0050676	0.209352	-2.07855
Q76G19	PDZD4	PMA	1.0712	14.0849	3.25267	0.00508695	0.209352	-2.08203
P16949	STMN1	PMA	-0.358463	16.3947	-3.25096	0.0051052	0.209352	-2.08531
P24752	ACAT1	PMA	0.270367	14.9563	3.23567	0.00527089	0.214533	-2.1145
P01023	A2M	PMA	0.570232	16.1882	3.22866	0.00534865	0.215244	-2.12789
Q5VZK9	CARMIL1	PMA	1.20489	11.2946	3.22699	0.00536728	0.215244	-2.13107
P62753	RPS6	PMA	0.665547	17.0753	3.22193	0.00542434	0.215944	-2.14073
P62304	SNRPE	PMA	0.48378	16.7709	3.204	0.00563123	0.219782	-2.17493
P61604	HSPE1	PMA	0.275713	17.3137	3.20267	0.00564694	0.219782	-2.17747
Q13098	GPS1	PMA	-0.228004	14.5474	-3.19977	0.00568119	0.219782	-2.18299
Q9BUR5	APOO	PMA	0.568786	11.1843	3.1972	0.00571175	0.219782	-2.18789
Q7Z4H8	POGLUT3	PMA	-0.434761	12.6846	-3.19374	0.00575311	0.219782	-2.19448
P30049	ATP5F1D	PMA	0.380761	14.2076	3.19296	0.00576252	0.219782	-2.19598
P10523	SAG	PMA	0.600099	11.6537	3.18887	0.0058119	0.220126	-2.20377
Q5T1M5	FKBP15	PMA	-0.354895	14.0223	-3.18338	0.00587877	0.221123	-2.21421
Q8WTT2	NOC3L	PMA	0.845355	10.3955	3.17185	0.00602188	0.221763	-2.23617
Q9H4Z3	PCIF1	PMA	0.371258	12.2029	3.17135	0.00602815	0.221763	-2.23712
Q14114	LRP8	PMA	-0.722287	15.593	-3.17067	0.00603676	0.221763	-2.23842
P02675	FGB	PMA	-1.2544	14.767	-3.16895	0.00605842	0.221763	-2.24169
Q2TAZ0	ATG2A	PMA	0.630787	12.3128	3.16428	0.00611767	0.222439	-2.25057
P20742		PMA	0.802894	11.7489	3.15671	0.00621499	0.224481	-2.26498
Q5TEU4	NDUFAF5	PMA	-0.927315	12.0144	-3.1455	0.00636198	0.227885	-2.2863
Q06546	GABPA	PMA	0.486627	12.5729	3.14317	0.00639282	0.227885	-2.29071
O00571	DDX3X	PMA	0.211284	15.0888	3.13798	0.00646234	0.228868	-2.30058
Q8NEY8	PPHLN1	PMA	-0.830336	12.2139	-3.13011	0.00656925	0.231128	-2.31554
Q9NXC5	MIOS	PMA	0.353073	11.4999	3.12539	0.00663406	0.231128	-2.32449
Q9H7N4	SCAF1	PMA	-0.657682	9.25051	-3.11808	0.00673581	0.231128	-2.33837
Q9BW83	IFT27	PMA	0.308209	12.8547	3.117	0.00675101	0.231128	-2.34043
Q9NWH9	SLTM	PMA	-0.459311	12.2491	-3.11307	0.00680645	0.231128	-2.34788
Q96PV6	LENG8	PMA	-0.594233	10.5531	-3.11302	0.0068072	0.231128	-2.34798
Q9P0R6	GSKIP	PMA	0.414723	12.6698	3.11192	0.00682281	0.231128	-2.35007
Q8NEY1	NAV1	PMA	0.638572	11.6809	3.10295	0.00695139	0.231699	-2.36708
P35237	SERPINB6	PMA	-0.272017	14.8168	-3.10237	0.00695975	0.231699	-2.36818
Q96Q89	KIF20B	PMA	0.657831	12.1114	3.10112	0.00697788	0.231699	-2.37055
P10515	DLAT	PMA	0.2485	13.8452	3.09894	0.00700959	0.231699	-2.37468
P35754	GLRX	PMA	-0.372587	19.2639	-3.09543	0.00706089	0.231988	-2.38132
Q6PFW1	PPIP5K1	PMA	0.399369	14.7051	3.08115	0.00727389	0.237556	-2.4084
Q92562	FIG4	PMA	0.732763	10.9605	3.07788	0.00732341	0.237749	-2.41458
Q5JRA6	MIA3	PMA	-0.30891	14.5564	-3.07382	0.00738544	0.238344	-2.42226
P00746	CFD	PMA	-0.474478	12.0169	-3.06805	0.00747462	0.238818	-2.43319
Q8N4N8	KIF2B	PMA	0.425577	14.2911	3.0657	0.00751121	0.238818	-2.43763
P19338	NCL	PMA	0.301011	15.3905	3.06419	0.00753481	0.238818	-2.44049
P52565	ARHGDIA	PMA	-0.32345	18.857	-3.06161	0.00757528	0.238818	-2.44536
P19823	ITIH2	PMA	0.623958	16.115	3.05854	0.00762381	0.238967	-2.45118
Q8NBQ5	HSD17B11	PMA	0.268033	17.0319	3.05503	0.0076796	0.239085	-2.45781
Q13425	SNTB2	PMA	0.397662	13.4898	3.0528	0.00771524	0.239085	-2.46203
Q9NZM1	MYOF	PMA	0.574406	11.9464	3.04901	0.0077762	0.239612	-2.46919
O94925	GLS	PMA	0.379542	12.6558	3.03686	0.00797487	0.242241	-2.49214
Q9UBW5	BIN2	PMA	-0.595272	14.9833	-3.03546	0.00799811	0.242241	-2.49479
Q9H0A8	COMMD4	PMA	0.570233	13.7059	3.03391	0.00802386	0.242241	-2.49771
O60568	PLOD3	PMA	0.302971	15.9235	3.03299	0.00803918	0.242241	-2.49945
Q9NY65	TUBA8	PMA	0.484086	17.2809	3.02906	0.00810512	0.242887	-2.50688
Q6UWV6	ENPP7	PMA	0.399298	13.4054	3.00693	0.00848578	0.252382	-2.5486
Q4VC44	FLYWCH1	PMA	0.685496	13.8329	3.00312	0.00855303	0.252382	-2.55578
O95197	RTN3	PMA	-0.748509	17.2082	-3.00268	0.00856082	0.252382	-2.5566
Q969Q4	ARL11	PMA	0.373246	12.2702	2.97368	0.00909082	0.265547	-2.61117
P05141	SLC25A5	PMA	0.311033	17.2941	2.97295	0.00910474	0.265547	-2.61256
P56378	ATP5MJ	PMA	0.6476	12.7706	2.966	0.00923663	0.267961	-2.62561
Q05193	DNM1	PMA	0.251141	16.7122	2.94502	0.00964619	0.269189	-2.66498
Q06323	PSME1	PMA	0.190844	18.0298	2.94113	0.00972412	0.269189	-2.67228
Q8TCA0	LRRC20	PMA	0.61656	11.7459	2.9402	0.00974285	0.269189	-2.67402
Q9NTN3	SLC35D1	PMA	0.42331	11.6817	2.93837	0.0097798	0.269189	-2.67746
O95168	NDUFB4	PMA	-0.325545	13.7653	-2.93824	0.00978229	0.269189	-2.67769
Q9NUU7	DDX19A	PMA	0.274652	14.0617	2.93664	0.0098147	0.269189	-2.68069
O75608	LYPLA1	PMA	0.367739	16.309	2.93451	0.00985803	0.269189	-2.68468
P53675	CLTCL1	PMA	-0.675522	12.6429	-2.93442	0.00985994	0.269189	-2.68486
Q15118	PDK1	PMA	0.305905	12.7627	2.93	0.00995027	0.269189	-2.69313
O15265	ATXN7	PMA	0.698379	11.1841	2.92852	0.00998072	0.269189	-2.6959
O96011	PEX11B	PMA	0.435427	13.36	2.9278	0.00999568	0.269189	-2.69726
Q9NVP1	DDX18	PMA	0.247515	13.6154	2.92751	0.0100017	0.269189	-2.6978
O15054	KDM6B	PMA	0.310616	11.2279	2.92748	0.0100023	0.269189	-2.69785
Q9HC38	GLOD4	PMA	0.251704	14.748	2.92557	0.0100417	0.269189	-2.70142
Q9NPI6	DCP1A	PMA	0.712563	10.2279	2.9239	0.0100765	0.269189	-2.70455
Q15154	PCM1	PMA	-0.559152	14.1103	-2.92259	0.0101038	0.269189	-2.70701
Q13952	NFYC	PMA	0.358652	13.3988	2.92191	0.010118	0.269189	-2.70828
Q14185	DOCK1	PMA	-0.307135	13.2059	-2.90922	0.0103866	0.273597	-2.73203
P22059	OSBP	PMA	-0.323678	13.771	-2.9075	0.0104235	0.273597	-2.73523
Q6GMV3	PTRHD1	PMA	-0.504561	13.0783	-2.90645	0.0104461	0.273597	-2.7372
Q9Y5S8	NOX1	PMA	0.346006	16.013	2.9035	0.0105098	0.273597	-2.74271
Q8IWI9	MGA	PMA	-0.715842	14.2825	-2.90236	0.0105345	0.273597	-2.74484
Q9Y4G6	TLN2	PMA	0.214286	16.6476	2.89578	0.0106785	0.276022	-2.75713
Q9NVA1	UQCC1	PMA	-0.508187	11.4513	-2.88994	0.010808	0.27805	-2.76804
Q9NQR4	NIT2	PMA	0.274648	15.4785	2.88371	0.0109477	0.278347	-2.77967
Q9Y259	CHKB	PMA	-0.337998	13.2315	-2.88146	0.0109984	0.278347	-2.78386
Q01459	CTBS	PMA	-0.623505	14.2081	-2.87732	0.0110927	0.278347	-2.79159
Q8IYB8	SUPV3L1	PMA	0.424811	11.7597	2.87441	0.0111595	0.278347	-2.79702
Q16836	HADH	PMA	0.322798	13.9633	2.87392	0.0111707	0.278347	-2.79793
Q7L590	MCM10	PMA	-0.390121	15.5514	-2.87355	0.0111793	0.278347	-2.79862
Q96MU7	YTHDC1	PMA	0.554262	12.6481	2.87157	0.011225	0.278347	-2.80231
P11049	CD37	PMA	-0.889294	13.3738	-2.87144	0.0112278	0.278347	-2.80254
Q96GX5	MASTL	PMA	0.591717	14.5991	2.8636	0.0114106	0.2816	-2.81715
Q96HN2	AHCYL2	PMA	-0.289565	14.2754	-2.85734	0.0115587	0.282362	-2.82881
P08697	SERPINF2	PMA	0.463387	15.0971	2.8561	0.011588	0.282362	-2.83111
Q9UBE0	SAE1	PMA	0.316647	13.7198	2.85573	0.0115968	0.282362	-2.83179
P19838	NFKB1	PMA	0.224582	14.3874	2.84731	0.0117994	0.286019	-2.84745
P06702	S100A9	PMA	-0.352369	19.9507	-2.83508	0.0121	0.292006	-2.87019
P05543	SERPINA7	PMA	0.639251	12.0664	2.82647	0.012316	0.29591	-2.88617
Q86SF2	GALNT7	PMA	-0.298655	11.6887	-2.82217	0.0124252	0.297224	-2.89415
Q8NBF6	AVL9	PMA	0.292118	12.7977	2.81966	0.0124895	0.297458	-2.89881
Q9NP58	ABCB6	PMA	0.507333	14.6352	2.81414	0.0126317	0.298738	-2.90903
P21912	SDHB	PMA	-0.306934	14.7335	-2.81333	0.0126528	0.298738	-2.91054
O14561	NDUFAB1	PMA	-0.642549	12.3744	-2.81092	0.0127155	0.298923	-2.915
Q8TD84	DSCAML1	PMA	-0.539287	13.1334	-2.80674	0.0128251	0.29998	-2.92275
Q15382	RHEB	PMA	0.275702	14.6414	2.80297	0.0129246	0.29998	-2.92973
Q96AT9	RPE	PMA	-0.739106	12.8501	-2.80294	0.0129254	0.29998	-2.92978
P20674	COX5A	PMA	0.343564	15.6085	2.79693	0.0130856	0.30241	-2.9409
Q9H0V9	LMAN2L	PMA	-0.223614	14.5048	-2.78905	0.0132987	0.306038	-2.95547
Q9H992	MARCHF7	PMA	-0.779698	12.5841	-2.77647	0.0136459	0.31209	-2.97871
Q02978	SLC25A11	PMA	0.282102	15.1471	2.77539	0.0136761	0.31209	-2.98071
P08069	IGF1R	PMA	-0.580987	10.7242	-2.77283	0.0137479	0.312421	-2.98543
Q8IYJ3	SYTL1	PMA	-0.37229	15.2709	-2.76273	0.0140349	0.31762	-3.00405
O43583	DENR	PMA	0.655824	13.6354	2.76003	0.0141127	0.31806	-3.00902
P62191	PSMC1	PMA	0.211959	14.8154	2.75795	0.0141728	0.318101	-3.01286
Q9NRV9	HEBP1	PMA	-0.362158	13.7245	-2.75576	0.0142366	0.318224	-3.0169
Q6N069	NAA16	PMA	0.417426	12.097	2.75347	0.0143034	0.318412	-3.02112
P49459	UBE2A	PMA	0.392765	12.5099	2.7473	0.0144848	0.321138	-3.03246
Q92729	PTPRU	PMA	0.545927	15.2942	2.73996	0.0147037	0.324671	-3.04597
Q9BW60	ELOVL1	PMA	0.490895	11.1315	2.73133	0.0149653	0.327569	-3.06184
P11177	PDHB	PMA	0.269794	13.5893	2.72825	0.0150594	0.327569	-3.06748
Q15058	KIF14	PMA	0.869156	12.1969	2.72692	0.0151006	0.327569	-3.06994
P14543	NID1	PMA	-1.21122	13.167	-2.72552	0.0151436	0.327569	-3.0725
Q9BQE3	TUBA1C	PMA	-0.69425	12.3205	-2.72468	0.0151697	0.327569	-3.07405
Q13228	SELENBP1	PMA	1.02883	11.4539	2.72385	0.0151952	0.327569	-3.07556
Q969Z0	TBRG4	PMA	0.387373	12.4537	2.7165	0.015425	0.32897	-3.08906
P36959	GMPR	PMA	0.563396	11.8619	2.71637	0.0154289	0.32897	-3.08928
O43143	DHX15	PMA	0.186815	16.476	2.71598	0.0154412	0.32897	-3.09
O60547	GMDS	PMA	-0.276616	13.8362	-2.71251	0.0155509	0.329949	-3.09637
P04632	CAPNS1	PMA	0.302402	16.2412	2.71071	0.0156081	0.329949	-3.09967
O95696	BRD1	PMA	0.385699	13.9984	2.69778	0.0160245	0.335331	-3.12333
P29401	TKT	PMA	-0.296504	19.8761	-2.69691	0.0160531	0.335331	-3.12493
Q14146	URB2	PMA	-0.697798	11.3788	-2.69663	0.016062	0.335331	-3.12543
Q92625	ANKS1A	PMA	-0.439652	11.2079	-2.69431	0.0161381	0.335331	-3.12968
O94889	KLHL18	PMA	0.328699	11.3591	2.69075	0.0162556	0.335331	-3.1362
Q96PU5	NEDD4L	PMA	0.31783	13.5055	2.68887	0.016318	0.335331	-3.13964
Q9HB71	CACYBP	PMA	0.278466	14.7884	2.68785	0.0163517	0.335331	-3.14149
Q86V48	LUZP1	PMA	-0.614362	11.7304	-2.68776	0.0163546	0.335331	-3.14165
P41229	KDM5C	PMA	0.456533	12.8272	2.68153	0.0165634	0.335652	-3.15304
P35268	RPL22	PMA	0.66668	14.9973	2.67955	0.0166302	0.335652	-3.15665
Q8NEZ5	FBXO22	PMA	0.315673	12.4705	2.67766	0.0166943	0.335652	-3.1601
P28799	GRN	PMA	-0.593284	11.5068	-2.67713	0.0167121	0.335652	-3.16106
O14910	LIN7A	PMA	-0.724321	11.6455	-2.67678	0.0167242	0.335652	-3.16171
P62834	RAP1A	PMA	-0.611257	15.3723	-2.67633	0.0167395	0.335652	-3.16253
Q16513	PKN2	PMA	-0.254469	12.6502	-2.67219	0.0168808	0.336981	-3.17008
P56537	EIF6	PMA	-0.319255	15.8788	-2.67078	0.0169294	0.336981	-3.17266
Q8NFV4	ABHD11	PMA	-0.407826	10.8984	-2.6656	0.0171085	0.338866	-3.1821
P05387	RPLP2	PMA	0.21236	16.503	2.66445	0.0171483	0.338866	-3.18419
O00194	RAB27B	PMA	0.338455	14.5104	2.66057	0.0172842	0.340317	-3.19126
Q96GE9	DMAC1	PMA	0.931997	9.28682	2.65566	0.0174571	0.342486	-3.20019
Q96CN7	ISOC1	PMA	0.264795	13.7232	2.64803	0.0177296	0.345646	-3.21408
Q9HAV0	GNB4	PMA	0.348643	13.9575	2.6476	0.0177449	0.345646	-3.21485
P35612	ADD2	PMA	0.68805	12.6506	2.64118	0.0179774	0.346416	-3.22652
P98088	MUC5AC	PMA	-0.81562	17.1921	-2.64088	0.0179887	0.346416	-3.22708
Q9H939	PSTPIP2	PMA	-0.318189	14.3508	-2.64015	0.0180153	0.346416	-3.22841
P11169	SLC2A3	PMA	-0.401923	18.8851	-2.63838	0.0180798	0.346416	-3.23161
P11234	RALB	PMA	-0.191076	15.0514	-2.63778	0.0181021	0.346416	-3.23271
Q96F46	IL17RA	PMA	-0.472366	12.0304	-2.63431	0.0182295	0.347636	-3.239
Q7Z4W1	DCXR	PMA	0.211011	14.9452	2.63129	0.0183415	0.348552	-3.24448
P62899	RPL31	PMA	0.656823	15.2524	2.62553	0.0185569	0.35142	-3.25494
Q8NFD5	ARID1B	PMA	-0.582981	10.6454	-2.62368	0.0186263	0.351516	-3.25828
P11766	ADH5	PMA	0.314355	16.1015	2.62153	0.0187076	0.351565	-3.26218
O60262	GNG7	PMA	-0.492148	12.1267	-2.6202	0.0187579	0.351565	-3.26458
Q8TCG1	CIP2A	PMA	-0.679488	10.2639	-2.61449	0.0189759	0.353656	-3.27492
O75792	RNASEH2A	PMA	0.387925	13.6208	2.61389	0.0189991	0.353656	-3.27602
Q01484	ANK2	PMA	0.480117	12.8507	2.60999	0.0191496	0.354077	-3.28308
Q14050	COL9A3	PMA	-1.2809	12.4057	-2.60994	0.0191516	0.354077	-3.28317
Q96BJ3	AIDA	PMA	0.429827	11.568	2.59888	0.0195845	0.355611	-3.30316
Q96BW5	PTER	PMA	0.367025	12.9011	2.59865	0.0195933	0.355611	-3.30357
O60716	CTNND1	PMA	-0.380112	12.8774	-2.59834	0.0196058	0.355611	-3.30414
O75131	CPNE3	PMA	0.176096	17.795	2.5941	0.0197744	0.355611	-3.31179
Q15173	PPP2R5B	PMA	-0.446781	10.9565	-2.58982	0.0199459	0.355611	-3.31951
P05107	ITGB2	PMA	-0.261863	19.2623	-2.58763	0.0200342	0.355611	-3.32346
Q9H8H0	NOL11	PMA	0.750195	10.7171	2.58483	0.0201479	0.355611	-3.32852
Q16595	FXN	PMA	0.509243	11.9698	2.58477	0.0201504	0.355611	-3.32863
Q13136	PPFIA1	PMA	-0.230468	13.1305	-2.58461	0.0201569	0.355611	-3.32891
P13798	APEH	PMA	0.190444	15.7176	2.58443	0.0201641	0.355611	-3.32923
P48539	PCP4	PMA	0.502189	13.9788	2.58356	0.0201994	0.355611	-3.33079
Q00796	SORD	PMA	0.243907	13.0187	2.58302	0.0202216	0.355611	-3.33178
P27707	DCK	PMA	0.222895	13.2592	2.58192	0.0202664	0.355611	-3.33376
Q9Y4P1	ATG4B	PMA	-0.300289	13.7013	-2.58148	0.0202843	0.355611	-3.33454
P14598	NCF1	PMA	0.398496	15.739	2.57962	0.0203608	0.355611	-3.33791
P0C025	NUDT17	PMA	0.454924	11.1942	2.57917	0.0203792	0.355611	-3.33871
Q96FZ2	HMCES	PMA	0.459145	10.1217	2.57715	0.0204625	0.355611	-3.34236
O60831	PRAF2	PMA	-0.275895	13.324	-2.57713	0.0204629	0.355611	-3.34238
P22061	PCMT1	PMA	0.313087	16.219	2.57577	0.0205193	0.355611	-3.34483
P40926	MDH2	PMA	0.154104	16.7263	2.57227	0.0206645	0.355611	-3.35113
Q8N8E3	CEP112	PMA	-0.726572	13.1796	-2.57223	0.0206662	0.355611	-3.3512
Q66GS9	CEP135	PMA	-0.371907	13.5761	-2.57207	0.0206728	0.355611	-3.35149
Q15785	TOMM34	PMA	-0.412504	11.5704	-2.5706	0.0207342	0.355611	-3.35414
Q99102	MUC4	PMA	1.12462	13.8587	2.56199	0.0210971	0.359549	-3.36962
Q9UKZ1	CNOT11	PMA	0.389307	11.7622	2.56001	0.021181	0.359549	-3.37317
P23284	PPIB	PMA	0.230082	17.7589	2.55952	0.0212021	0.359549	-3.37405
P61247	RPS3A	PMA	0.269733	15.4031	2.55893	0.0212275	0.359549	-3.37512
P63220	RPS21	PMA	0.349609	15.9183	2.5555	0.0213744	0.360227	-3.38128
Q9Y3T6	R3HCC1	PMA	0.351813	12.4394	2.55059	0.0215865	0.360227	-3.39008
O15144	ARPC2	PMA	0.193713	18.3032	2.54966	0.0216269	0.360227	-3.39175
Q8WWI1	LMO7	PMA	-0.622216	12.9375	-2.54852	0.0216767	0.360227	-3.3938
O00453	LST1	PMA	-0.386881	15.7964	-2.54701	0.0217425	0.360227	-3.39651
P12724	RNASE3	PMA	1.22635	16.5712	2.54658	0.0217614	0.360227	-3.39728
Q9NUJ3	TCP11L1	PMA	0.371285	11.5013	2.54607	0.0217838	0.360227	-3.3982
Q6NUM6	TYW1B	PMA	-0.622341	13.7056	-2.54549	0.0218093	0.360227	-3.39924
Q7Z401	DENND4A	PMA	-0.28456	12.1934	-2.54363	0.0218908	0.360227	-3.40257
O60784	TOM1	PMA	-0.273135	15.0318	-2.54279	0.021928	0.360227	-3.40408
Q8WUF8	FAM172A	PMA	0.387438	11.3441	2.53852	0.0221165	0.362233	-3.41171
P09132	SRP19	PMA	0.36267	13.3027	2.53534	0.0222586	0.363033	-3.41742
A8MTJ3	GNAT3	PMA	0.659293	19.0591	2.53445	0.0222985	0.363033	-3.41901
Q7Z422	SZRD1	PMA	0.466009	11.5335	2.53206	0.0224056	0.363691	-3.42328
Q96AG4	LRRC59	PMA	0.459507	14.6896	2.52992	0.0225021	0.364173	-3.42711
Q12792	TWF1	PMA	-0.278369	14.4016	-2.5263	0.0226662	0.365744	-3.43358
Q9Y2H1	STK38L	PMA	-0.34261	13.6338	-2.52392	0.0227747	0.36641	-3.43784
O75419	CDC45	PMA	-0.724269	13.8103	-2.51856	0.0230209	0.369283	-3.44741
Q13526	PIN1	PMA	-0.32574	12.4875	-2.51476	0.0231968	0.370862	-3.45419
Q9NVF7	FBXO28	PMA	-0.603737	12.0934	-2.51225	0.0233138	0.370862	-3.45867
P02786	TFRC	PMA	0.903393	10.6544	2.51103	0.023371	0.370862	-3.46085
P08519		PMA	0.685743	10.3235	2.5103	0.023405	0.370862	-3.46214
A3KMH1	VWA8	PMA	0.396249	10.7853	2.50915	0.0234594	0.370862	-3.4642
Q14761	PTPRCAP	PMA	0.684477	13.1631	2.50574	0.0236199	0.37232	-3.47027
P20138	CD33	PMA	-0.698048	12.8635	-2.50414	0.0236959	0.372442	-3.47313
Q9NRG9	AAAS	PMA	0.270925	12.7517	2.50123	0.023834	0.372635	-3.4783
Q6FI81	CIAPIN1	PMA	-0.417862	12.5159	-2.49839	0.0239701	0.372635	-3.48336
Q8NFZ5	TNIP2	PMA	-0.530466	11.1283	-2.49751	0.0240122	0.372635	-3.48492
Q9P2S5	WRAP73	PMA	0.615088	9.91891	2.49592	0.0240887	0.372635	-3.48775
P17987	TCP1	PMA	0.170325	15.9958	2.4956	0.0241043	0.372635	-3.48833
P39748	FEN1	PMA	-0.236577	16.0148	-2.49364	0.0241992	0.372635	-3.49182
Q5JWF2	GNAS	PMA	-0.261347	15.2024	-2.49217	0.0242703	0.372635	-3.49443
Q9UBQ0	VPS29	PMA	0.275803	14.2454	2.49182	0.0242874	0.372635	-3.49505
Q8IYB7	DIS3L2	PMA	0.303708	11.3409	2.49106	0.024324	0.372635	-3.49639
A8MVS5	C19orf38	PMA	-0.508735	15.1914	-2.48968	0.0243914	0.372635	-3.49885
P28074	PSMB5	PMA	0.316976	12.5199	2.48512	0.0246148	0.374072	-3.50695
Q9NVH6	TMLHE	PMA	-0.414757	11.0185	-2.4845	0.0246454	0.374072	-3.50806
Q16576	RBBP7	PMA	0.397235	13.9744	2.48357	0.0246912	0.374072	-3.50971
Q96C01	FAM136A	PMA	-0.404753	10.9376	-2.47966	0.0248847	0.375884	-3.51664
Q92630	DYRK2	PMA	0.67521	15.3697	2.47613	0.0250606	0.375884	-3.5229
Q5T1R4	HIVEP3	PMA	1.77628	14.7839	2.47536	0.0250995	0.375884	-3.52427
O43299	AP5Z1	PMA	0.474342	11.5586	2.47522	0.0251065	0.375884	-3.52452
P15153	RAC2	PMA	0.413246	19.0293	2.47375	0.0251802	0.375884	-3.52713
P52848	NDST1	PMA	0.363712	12.4727	2.47241	0.0252478	0.375884	-3.52951
Q8TE02	ELP5	PMA	-0.330778	11.7664	-2.47063	0.0253377	0.375884	-3.53266
Q13155	AIMP2	PMA	0.269668	13.9894	2.47014	0.0253622	0.375884	-3.53352
Q9H9H4	VPS37B	PMA	-0.282486	13.9834	-2.46717	0.0255129	0.377092	-3.53878
O94804	STK10	PMA	-0.316406	15.5626	-2.46404	0.0256728	0.377556	-3.54432
P07902	GALT	PMA	-0.311217	13.471	-2.46296	0.0257282	0.377556	-3.54623
P51991	HNRNPA3	PMA	0.18328	15.8702	2.4601	0.0258751	0.377556	-3.55129
Q6PI48	DARS2	PMA	0.198755	13.0585	2.45867	0.025949	0.377556	-3.55382
O60234	GMFG	PMA	0.572945	17.0591	2.45866	0.0259499	0.377556	-3.55385
P53007	SLC25A1	PMA	0.311739	13.4097	2.45723	0.0260236	0.377556	-3.55636
P42892	ECE1	PMA	-0.582387	10.9086	-2.45523	0.0261278	0.377556	-3.55991
Q9Y3L5	RAP2C	PMA	0.289015	15.6595	2.45512	0.0261333	0.377556	-3.5601
Q9UBT2	UBA2	PMA	0.272967	13.8672	2.45347	0.0262197	0.377556	-3.56302
Q9NTJ3	SMC4	PMA	-0.405715	12.4102	-2.45073	0.0263632	0.377556	-3.56786
Q53S08	RAB6D	PMA	-0.33279	13.8386	-2.44955	0.0264249	0.377556	-3.56993
Q13555	CAMK2G	PMA	0.260883	14.0758	2.44808	0.0265022	0.377556	-3.57252
O43633	CHMP2A	PMA	0.539479	15.0026	2.44742	0.0265372	0.377556	-3.57369
Q9BSR8	YIPF4	PMA	-0.490784	12.3104	-2.44624	0.0265995	0.377556	-3.57577
Q9NZ52	GGA3	PMA	-0.296877	14.4154	-2.44611	0.0266067	0.377556	-3.57601
P40616	ARL1	PMA	0.231406	15.2129	2.44526	0.0266518	0.377556	-3.57751
P61019	RAB2A	PMA	-0.363352	15.2198	-2.44283	0.0267811	0.378184	-3.5818
Q8WUK0	PTPMT1	PMA	-0.570686	11.2781	-2.4412	0.0268679	0.378184	-3.58467
O60437	PPL	PMA	0.290459	13.5546	2.44052	0.0269042	0.378184	-3.58587
Q96KQ4	PPP1R13B	PMA	-0.580037	14.6563	-2.43492	0.0272056	0.381109	-3.59574
Q76L83	ASXL2	PMA	0.303506	14.0664	2.43406	0.027252	0.381109	-3.59725
Q9H8X2	IPPK	PMA	0.93385	18.3368	2.43035	0.027454	0.381707	-3.60379
P23634	ATP2B4	PMA	-0.233469	14.9746	-2.42962	0.0274939	0.381707	-3.60507
Q8N0W3	FCSK	PMA	-0.527039	11.2453	-2.42905	0.027525	0.381707	-3.60607
P11277	SPTB	PMA	0.621791	13.4637	2.42814	0.0275747	0.381707	-3.60767
Q86X27	RALGPS2	PMA	0.594467	10.8335	2.42509	0.0277423	0.382738	-3.61303
Q9Y277	VDAC3	PMA	0.243755	15.0887	2.42183	0.0279221	0.382738	-3.61875
P55327	TPD52	PMA	-0.269388	13.2437	-2.41572	0.0282631	0.382738	-3.62949
Q05639	EEF1A2	PMA	0.159741	17.7556	2.41518	0.0282935	0.382738	-3.63044
P02774	GC	PMA	0.46501	13.7734	2.4151	0.0282979	0.382738	-3.63058
P40763	STAT3	PMA	-0.219547	15.0471	-2.41316	0.0284069	0.382738	-3.63398
P80303	NUCB2	PMA	-0.329139	13.0368	-2.41294	0.0284197	0.382738	-3.63438
Q8WVM7	STAG1	PMA	0.273103	13.4053	2.41158	0.0284961	0.382738	-3.63676
Q8N1K5	THEMIS	PMA	0.409912	15.4485	2.4114	0.0285061	0.382738	-3.63707
Q9P0S3	ORMDL1	PMA	0.474004	13.291	2.41044	0.0285605	0.382738	-3.63875
P55769	SNU13	PMA	0.438255	14.7675	2.40926	0.0286275	0.382738	-3.64082
Q9BZE1	MRPL37	PMA	0.581193	10.7779	2.40841	0.0286757	0.382738	-3.64231
O94901	SUN1	PMA	0.586648	11.4483	2.40813	0.0286919	0.382738	-3.64281
Q8IWA5	SLC44A2	PMA	-0.768127	15.8969	-2.40624	0.0287992	0.382738	-3.64611
Q9Y6I4	USP3	PMA	-0.301605	13.7021	-2.40515	0.0288615	0.382738	-3.64802
Q5T160	RARS2	PMA	0.809972	9.67468	2.40428	0.0289115	0.382738	-3.64955
Q6F5E8	CARMIL2	PMA	0.807266	14.1705	2.40419	0.0289167	0.382738	-3.64971
Q9NWV8	BABAM1	PMA	0.260611	12.4943	2.40105	0.0290973	0.382738	-3.65522
Q9H8M2	BRD9	PMA	0.44622	10.9109	2.40063	0.0291213	0.382738	-3.65594
Q96I25	RBM17	PMA	0.249633	12.7599	2.39983	0.0291676	0.382738	-3.65735
Q9UNF0	PACSIN2	PMA	-0.183643	15.8026	-2.39962	0.0291794	0.382738	-3.6577
Q8IWK6	ADGRA3	PMA	-0.530119	12.1377	-2.39939	0.0291931	0.382738	-3.65812
Q9Y478	PRKAB1	PMA	0.423725	14.2056	2.39586	0.029398	0.38393	-3.6643
Q00537	CDK17	PMA	0.338291	11.4855	2.39455	0.029474	0.38393	-3.66658
P00395	COX1	PMA	0.783482	11.0689	2.39156	0.0296491	0.38393	-3.67181
P63261	ACTG1	PMA	-1.05173	11.9048	-2.38905	0.0297966	0.38393	-3.6762
Q96CD2	PPCDC	PMA	0.187325	13.166	2.38868	0.0298184	0.38393	-3.67684
Q6R327	RICTOR	PMA	0.380131	11.0112	2.38865	0.0298199	0.38393	-3.67689
Q10713	PMPCA	PMA	-0.262232	12.4105	-2.38799	0.0298593	0.38393	-3.67805
P19404	NDUFV2	PMA	0.215798	14.3564	2.38531	0.0300179	0.38393	-3.68273
Q8WUH6	TMEM263	PMA	0.545304	11.6005	2.38173	0.0302307	0.38393	-3.68897
O95870	ABHD16A	PMA	0.262791	13.8302	2.37954	0.030362	0.38393	-3.69279
Q13112	CHAF1B	PMA	-0.214625	15.4878	-2.37874	0.0304103	0.38393	-3.69419
P05204	HMGN2	PMA	-1.40252	16.9776	-2.37867	0.0304146	0.38393	-3.69432
Q9NWW6	NMRK1	PMA	0.382569	11.389	2.37834	0.0304342	0.38393	-3.69489
P30084	ECHS1	PMA	0.190917	14.1577	2.37761	0.0304779	0.38393	-3.69615
Q86WB0	ZC3HC1	PMA	-0.255664	12.6913	-2.37641	0.0305503	0.38393	-3.69825
P00505	GOT2	PMA	0.290328	15.0959	2.37605	0.0305723	0.38393	-3.69888
Q9Y266	NUDC	PMA	-0.407693	13.3075	-2.37488	0.030643	0.38393	-3.70092
P04080	CSTB	PMA	-0.210498	15.6099	-2.37426	0.0306806	0.38393	-3.702
P02649	APOE	PMA	-0.642793	11.1275	-2.37348	0.0307276	0.38393	-3.70335
P48443	RXRG	PMA	-0.515808	11.2896	-2.37332	0.0307377	0.38393	-3.70364
Q10588	BST1	PMA	-0.632751	16.7047	-2.37216	0.0308082	0.38393	-3.70566
Q9BTY7	HGH1	PMA	0.258116	12.3033	2.37175	0.0308327	0.38393	-3.70636
Q16629	SRSF7	PMA	0.226414	15.8327	2.37032	0.0309202	0.384143	-3.70886
P14854	COX6B1	PMA	-0.336017	13.805	-2.36549	0.0312159	0.386648	-3.71726
Q7L591	DOK3	PMA	0.235094	16.2412	2.36429	0.0312899	0.386648	-3.71934
Q9H1K4	SLC25A18	PMA	0.420903	12.6872	2.362	0.0314321	0.386648	-3.72334
Q9Y3C4	TPRKB	PMA	0.333587	13.1497	2.36145	0.0314661	0.386648	-3.72429
Q9UNI6	DUSP12	PMA	0.696667	10.6177	2.3592	0.0316055	0.386648	-3.72819
P62273	RPS29	PMA	0.699542	13.3216	2.3586	0.0316433	0.386648	-3.72925
Q8NCA5	FAM98A	PMA	-1.06026	13.0238	-2.3574	0.0317179	0.386648	-3.73132
P35813	PPM1A	PMA	-0.192345	14.5005	-2.35586	0.0318147	0.386648	-3.734
P06731	CEACAM5	PMA	-0.275322	19.7353	-2.34864	0.03227	0.386648	-3.74652
Q5SWX8	ODR4	PMA	-0.49042	10.7099	-2.34648	0.0324077	0.386648	-3.75027
Q9NW68	BSDC1	PMA	0.304392	11.6198	2.34639	0.0324133	0.386648	-3.75042
Q9BRV8	SIKE1	PMA	-0.197639	13.0728	-2.34503	0.0325002	0.386648	-3.75278
P13688	CEACAM1	PMA	-1.10246	10.2929	-2.34491	0.0325082	0.386648	-3.753
P49915	GMPS	PMA	0.204257	13.4999	2.34451	0.0325335	0.386648	-3.75368
Q53H12	AGK	PMA	0.189489	13.0264	2.34414	0.0325576	0.386648	-3.75433
Q96FJ0	STAMBPL1	PMA	0.523922	11.9978	2.34342	0.0326037	0.386648	-3.75558
Q9NP61	ARFGAP3	PMA	0.286016	12.4454	2.3426	0.0326558	0.386648	-3.75699
Q9H944	MED20	PMA	0.440746	11.2084	2.34197	0.0326969	0.386648	-3.75809
Q9UJX2	CDC23	PMA	0.428777	12.0374	2.34165	0.032717	0.386648	-3.75863
P21964	COMT	PMA	-0.729554	14.0499	-2.34081	0.0327712	0.386648	-3.76009
O94905	ERLIN2	PMA	-0.216397	14.801	-2.34	0.0328239	0.386648	-3.7615
O95249	GOSR1	PMA	-0.529869	12.4108	-2.33805	0.0329498	0.386648	-3.76487
P51797	CLCN6	PMA	0.544977	14.6989	2.33805	0.03295	0.386648	-3.76488
Q99996	AKAP9	PMA	-0.467932	12.8674	-2.33795	0.0329565	0.386648	-3.76505
P07477	PRSS1	PMA	0.580344	16.9765	2.33783	0.0329642	0.386648	-3.76526
Q5TCZ1	SH3PXD2A	PMA	0.262219	14.8438	2.33781	0.0329651	0.386648	-3.76528
O75223	GGCT	PMA	-0.261844	14.3881	-2.33422	0.0331989	0.387612	-3.7715
Q16134	ETFDH	PMA	-0.224247	12.6361	-2.33285	0.0332885	0.387612	-3.77387
Q06330	RBPJ	PMA	0.228766	12.9635	2.33258	0.0333061	0.387612	-3.77433
Q16774	GUK1	PMA	0.594752	12.5303	2.33219	0.0333315	0.387612	-3.775
Q9H0C8	ILKAP	PMA	0.290283	12.6104	2.32767	0.0336289	0.389944	-3.78282
Q06830	PRDX1	PMA	0.174657	15.9833	2.3266	0.0336997	0.389944	-3.78467
Q9Y6A5	TACC3	PMA	-0.284676	12.3705	-2.32589	0.0337465	0.389944	-3.78589
Q92551	IP6K1	PMA	-0.318845	11.7054	-2.32139	0.0340457	0.39257	-3.79365
P84022	SMAD3	PMA	0.287706	13.8118	2.31885	0.0342158	0.393655	-3.79803
P46199	MTIF2	PMA	0.419043	10.8168	2.31711	0.0343332	0.393655	-3.80103
Q562R1	ACTBL2	PMA	-0.640417	16.5625	-2.31676	0.0343564	0.393655	-3.80163
Q96QG7	MTMR9	PMA	-0.262927	12.7493	-2.31556	0.0344375	0.393757	-3.8037
Q9NUW8	TDP1	PMA	-0.349009	11.3686	-2.31358	0.0345716	0.394464	-3.80712
Q9P2M7	CGN	PMA	-1.89565	14.2764	-2.30897	0.0348853	0.397211	-3.81505
P42694	HELZ	PMA	-0.637542	12.9462	-2.30722	0.035005	0.397744	-3.81805
Q02818	NUCB1	PMA	-0.198164	13.4655	-2.30469	0.0351787	0.398887	-3.8224
O43707	ACTN4	PMA	-0.221886	17.7611	-2.30137	0.0354082	0.400168	-3.82811
P53992	SEC24C	PMA	0.261615	14.5285	2.30094	0.0354384	0.400168	-3.82886
Q9H706	GAREM1	PMA	0.823128	10.7433	2.29344	0.0359623	0.40141	-3.84173
Q12996	CSTF3	PMA	-0.245079	13.7122	-2.29338	0.0359659	0.40141	-3.84182
P29374	ARID4A	PMA	-0.489879	11.8639	-2.2927	0.0360139	0.40141	-3.84299
P51532	SMARCA4	PMA	-0.271613	15.476	-2.2919	0.0360705	0.40141	-3.84436
Q16698	DECR1	PMA	0.316232	14.2984	2.29117	0.0361222	0.40141	-3.84562
Q9Y5A7	NUB1	PMA	0.378808	12.7436	2.29094	0.0361382	0.40141	-3.84601
O95159	ZFPL1	PMA	0.281683	12.7703	2.28954	0.036237	0.40141	-3.8484
Q9UJV3	MID2	PMA	0.366744	13.3954	2.28625	0.0364707	0.40141	-3.85404
P18859	ATP5PF	PMA	0.245341	13.9234	2.2861	0.0364815	0.40141	-3.8543
Q96DT6	ATG4C	PMA	0.703903	10.6236	2.28474	0.0365788	0.40141	-3.85663
Q96JB5	CDK5RAP3	PMA	0.316426	12.4193	2.28473	0.0365793	0.40141	-3.85665
Q7Z434	MAVS	PMA	0.343967	13.0828	2.28418	0.0366187	0.40141	-3.85759
P49448	GLUD2	PMA	0.430599	14.0067	2.2837	0.0366532	0.40141	-3.85842
Q86VS8	HOOK3	PMA	-0.328579	17.026	-2.28159	0.0368043	0.40141	-3.86202
P20338	RAB4A	PMA	0.232789	13.8196	2.28116	0.036835	0.40141	-3.86275
Q8TF68	ZNF384	PMA	-0.412994	11.973	-2.27915	0.0369802	0.40141	-3.8662
P46934	NEDD4	PMA	-0.266338	12.3231	-2.27818	0.0370501	0.40141	-3.86785
O43504	LAMTOR5	PMA	-0.237252	15.8998	-2.27793	0.0370682	0.40141	-3.86828
Q04837	SSBP1	PMA	-0.539792	14.64	-2.27714	0.0371257	0.40141	-3.86964
Q99549	MPHOSPH8	PMA	0.341647	12.6013	2.27705	0.0371323	0.40141	-3.86979
O00268	TAF4	PMA	-0.309677	12.1654	-2.277	0.0371356	0.40141	-3.86987
Q9NW64	RBM22	PMA	-0.270918	12.1059	-2.27656	0.0371676	0.40141	-3.87063
Q9UKC9	FBXL2	PMA	0.248035	13.7516	2.27069	0.0375952	0.405226	-3.88064
Q68CZ6	HAUS3	PMA	-0.381434	10.2968	-2.26794	0.0377973	0.406601	-3.88534
Q8TAT5	NEIL3	PMA	0.793114	15.4145	2.26675	0.0378856	0.406709	-3.88738
O15397	IPO8	PMA	0.289574	12.1987	2.26557	0.0379729	0.406709	-3.88939
Q01085	TIAL1	PMA	0.302051	13.8204	2.26472	0.0380356	0.406709	-3.89084
A4D1P6	WDR91	PMA	0.234153	13.8433	2.26231	0.0382143	0.406709	-3.89494
P31939	ATIC	PMA	0.205597	15.3731	2.26198	0.0382386	0.406709	-3.89549
Q9Y5Q9	GTF3C3	PMA	0.266206	14.5894	2.25827	0.038516	0.406709	-3.90182
P53597	SUCLG1	PMA	0.223405	13.5197	2.25766	0.0385623	0.406709	-3.90287
Q6PJT7	ZC3H14	PMA	-0.225941	12.3738	-2.25561	0.0387163	0.406709	-3.90635
P16455		PMA	-0.378846	11.2481	-2.25418	0.0388241	0.406709	-3.90879
Q96ER3	SAAL1	PMA	-0.58498	11.1566	-2.25327	0.038893	0.406709	-3.91033
P62891	RPL39	PMA	-0.495646	13.1113	-2.25276	0.0389314	0.406709	-3.9112
P55145	MANF	PMA	-0.555566	14.487	-2.25189	0.0389974	0.406709	-3.91268
Q00688	FKBP3	PMA	-0.388234	15.1881	-2.2513	0.0390418	0.406709	-3.91367
Q13435	SF3B2	PMA	-0.173146	15.3708	-2.25073	0.0390855	0.406709	-3.91465
Q9UJW0	DCTN4	PMA	-0.221048	13.4975	-2.24976	0.0391588	0.406709	-3.91629
Q86X76	NIT1	PMA	-0.226684	13.9579	-2.24974	0.039161	0.406709	-3.91634
Q9C0D5	TANC1	PMA	-0.630384	15.0197	-2.24942	0.0391854	0.406709	-3.91688
Q53H82	LACTB2	PMA	-0.249049	13.645	-2.24763	0.0393215	0.406709	-3.91991
Q9NR19	ACSS2	PMA	-0.253168	13.4068	-2.2444	0.0395692	0.406709	-3.9254
Q70EL1	USP54	PMA	-0.706993	11.5187	-2.24383	0.0396134	0.406709	-3.92637
P00918	CA2	PMA	0.317647	14.3419	2.24305	0.0396734	0.406709	-3.9277
Q15365	PCBP1	PMA	0.303989	17.2128	2.24128	0.0398098	0.406709	-3.9307
O60508	CDC40	PMA	0.225896	12.073	2.24128	0.0398101	0.406709	-3.9307
P15309	ACP3	PMA	-0.45625	13.1443	-2.24086	0.0398422	0.406709	-3.93141
Q9NPY3	CD93	PMA	-0.502563	15.0846	-2.24081	0.0398459	0.406709	-3.93149
P31751	AKT2	PMA	0.32096	11.9748	2.24075	0.0398507	0.406709	-3.93159
P00352	ALDH1A1	PMA	0.265205	14.3088	2.24025	0.0398892	0.406709	-3.93244
Q68CQ7	GLT8D1	PMA	0.478925	9.71097	2.23962	0.0399387	0.406709	-3.93352
Q9Y5Y2	NUBP2	PMA	0.601838	12.2989	2.23864	0.0400145	0.406709	-3.93517
O95140	MFN2	PMA	-0.310021	11.206	-2.23825	0.0400445	0.406709	-3.93583
Q03405	PLAUR	PMA	-0.618225	13.6138	-2.23669	0.0401663	0.407188	-3.93848
Q86WA8	LONP2	PMA	-0.661644	11.9697	-2.2317	0.0405569	0.409978	-3.94693
P32321	DCTD	PMA	0.445078	10.8339	2.23126	0.0405919	0.409978	-3.94768
Q9NPF5	DMAP1	PMA	-0.36101	12.8439	-2.22654	0.0409646	0.412977	-3.95566
Q9UIA9	XPO7	PMA	0.154944	14.3025	2.22319	0.0412311	0.414898	-3.96131
O95861	BPNT1	PMA	-0.191393	13.8776	-2.21942	0.0415334	0.416414	-3.96768
Q8IXM2	C17orf49	PMA	-0.392597	14.9188	-2.21941	0.0415345	0.416414	-3.96771
P35241	RDX	PMA	-0.463531	14.1339	-2.21782	0.0416623	0.416418	-3.97039
Q969G3	SMARCE1	PMA	-0.429083	12.6993	-2.21665	0.0417568	0.416418	-3.97236
Q6GTX8	LAIR1	PMA	0.272209	14.2999	2.21362	0.0420023	0.416418	-3.97747
Q9Y3L3	SH3BP1	PMA	0.341152	13.0812	2.21286	0.0420646	0.416418	-3.97876
Q6ZRI6	C15orf39	PMA	0.335312	11.4635	2.21259	0.0420865	0.416418	-3.97922
A0AV96	RBM47	PMA	-0.248634	13.021	-2.21243	0.0420991	0.416418	-3.97948
Q07666	KHDRBS1	PMA	-0.331899	13.9438	-2.21222	0.0421166	0.416418	-3.97984
Q96AY4	TTC28	PMA	-0.474436	16.2354	-2.21186	0.0421457	0.416418	-3.98044
Q92611	EDEM1	PMA	0.488419	10.853	2.2096	0.0423303	0.416742	-3.98425
O15264	MAPK13	PMA	0.270488	12.4026	2.20959	0.0423313	0.416742	-3.98427
P00734	F2	PMA	0.435839	12.1	2.20522	0.0426904	0.418662	-3.99162
Q9NUU6	OTULINL	PMA	-0.344948	14.7431	-2.20522	0.0426906	0.418662	-3.99163
Q9NRC8	SIRT7	PMA	-0.653738	10.0723	-2.2037	0.042816	0.418662	-3.99418
Q7Z2Z1	TICRR	PMA	0.486959	13.7471	2.20349	0.0428334	0.418662	-3.99454
P0DOY2		PMA	-0.488513	11.5666	-2.20206	0.0429515	0.419014	-3.99694
Q10472	GALNT1	PMA	-0.192116	13.0531	-2.2011	0.0430315	0.419014	-3.99855
Q02543	RPL18A	PMA	0.259894	15.318	2.20028	0.0430999	0.419014	-3.99994
Q96HR3	MED30	PMA	-0.25795	11.2912	-2.19608	0.0434505	0.419786	-4.00699
P35249	RFC4	PMA	0.302554	12.885	2.19577	0.0434764	0.419786	-4.00751
Q9BTV4	TMEM43	PMA	-0.30048	15.2462	-2.19521	0.0435233	0.419786	-4.00844
P42166	TMPO	PMA	0.213341	14.413	2.19466	0.0435698	0.419786	-4.00937
Q6NVV1		PMA	1.08635	12.7021	2.19421	0.0436079	0.419786	-4.01013
Q96E39	RBMXL1	PMA	0.311909	11.2878	2.19315	0.0436973	0.419786	-4.01192
P49662	CASP4	PMA	0.319355	13.5857	2.1929	0.0437181	0.419786	-4.01233
Q9BRA2	TXNDC17	PMA	0.321317	15.8577	2.18873	0.0440712	0.420563	-4.01933
P67870	CSNK2B	PMA	-0.183744	13.8675	-2.18862	0.0440799	0.420563	-4.0195
Q8IWU2	LMTK2	PMA	-0.235015	13.213	-2.18848	0.0440919	0.420563	-4.01973
Q8NB16	MLKL	PMA	-0.195956	14.9662	-2.1883	0.0441075	0.420563	-4.02004
P09467	FBP1	PMA	-0.325462	18.0498	-2.18524	0.0443682	0.421582	-4.02517
P56377	AP1S2	PMA	-0.283994	15.4707	-2.18523	0.0443689	0.421582	-4.02518
P30043	BLVRB	PMA	0.260599	14.7005	2.18147	0.0446915	0.423908	-4.03148
Q15907	RAB11B	PMA	0.318962	18.0232	2.18053	0.0447726	0.42394	-4.03305
P49189	ALDH9A1	PMA	0.206007	13.9434	2.17443	0.0453019	0.425325	-4.04326
P10809	HSPD1	PMA	0.196322	16.3144	2.17353	0.04538	0.425325	-4.04476
O75368	SH3BGRL	PMA	-0.27175	17.2021	-2.17216	0.0455002	0.425325	-4.04705
P13861	PRKAR2A	PMA	0.19544	14.7214	2.17206	0.0455089	0.425325	-4.04722
Q9BUL8	PDCD10	PMA	0.20661	15.9686	2.17182	0.0455294	0.425325	-4.04761
O14618	CCS	PMA	0.653677	13.6205	2.17173	0.0455377	0.425325	-4.04777
Q9NPJ3	ACOT13	PMA	0.29215	13.3664	2.17061	0.0456353	0.425325	-4.04963
Q9UBS4	DNAJB11	PMA	-0.330164	14.6292	-2.17044	0.0456506	0.425325	-4.04992
Q15126	PMVK	PMA	0.265529	12.7331	2.17019	0.0456725	0.425325	-4.05034
Q96AQ6	PBXIP1	PMA	-0.349382	13.3334	-2.16975	0.045711	0.425325	-4.05107
O15231	ZNF185	PMA	-0.246804	12.3459	-2.16861	0.0458117	0.425325	-4.05298
Q96PE7	MCEE	PMA	0.348835	12.4737	2.16812	0.0458547	0.425325	-4.05379
Q9H9P8	L2HGDH	PMA	0.368379	11.6212	2.16563	0.0460744	0.426345	-4.05794
Q9UHA4	LAMTOR3	PMA	0.397904	14.1225	2.16451	0.046174	0.426345	-4.05982
Q8IWE5	PLEKHM2	PMA	-0.301736	11.5439	-2.16423	0.0461991	0.426345	-4.06029
Q9BTE6	AARSD1	PMA	0.309906	11.6321	2.16324	0.046287	0.426434	-4.06194
P14678	SNRPB	PMA	0.214631	17.3393	2.16088	0.0464972	0.427071	-4.06587
Q969V6	MRTFA	PMA	-0.384069	10.8007	-2.15983	0.0465908	0.427071	-4.06761
Q9BZZ5	API5	PMA	0.189533	15.1548	2.15983	0.0465909	0.427071	-4.06761
O75629	CREG1	PMA	-0.404609	13.835	-2.15753	0.0467971	0.42824	-4.07144
Q9BQ04	RBM4B	PMA	0.247838	13.9078	2.15404	0.0471114	0.430051	-4.07725
Q9BYX7		PMA	-0.388655	11.121	-2.15358	0.0471526	0.430051	-4.07801
Q9BRR9	ARHGAP9	PMA	-0.322891	16.1707	-2.15076	0.0474085	0.431663	-4.0827
Q8NEQ5	C1orf162	PMA	-0.736724	12.392	-2.14899	0.0475698	0.432227	-4.08564
Q9HCG8	CWC22	PMA	-0.313997	12.3968	-2.14756	0.0476998	0.432227	-4.08801
P33993	MCM7	PMA	0.475922	10.7978	2.14747	0.0477082	0.432227	-4.08816
P18669	PGAM1	PMA	-0.206627	17.9558	-2.14417	0.0480108	0.432936	-4.09363
Q05086	UBE3A	PMA	-0.269143	12.021	-2.14329	0.0480924	0.432936	-4.0951
Q9UHV9	PFDN2	PMA	0.263212	14.6913	2.14275	0.0481416	0.432936	-4.09599
Q99447	PCYT2	PMA	-0.218422	13.1826	-2.14258	0.0481574	0.432936	-4.09628
P62081	RPS7	PMA	0.438819	16.196	2.1423	0.0481834	0.432936	-4.09674
Q00013	MPP1	PMA	0.306663	13.8864	2.14001	0.0483948	0.433912	-4.10053
Q3KQU3	MAP7D1	PMA	-0.31446	14.3069	-2.13796	0.0485856	0.433912	-4.10394
O00716	E2F3	PMA	-0.61465	10.7704	-2.1379	0.0485909	0.433912	-4.10403
Q9H0P0	NT5C3A	PMA	0.210022	13.4388	2.13366	0.0489865	0.433912	-4.11105
P43897	TSFM	PMA	0.196937	13.0601	2.13337	0.0490139	0.433912	-4.11154
P08473	MME	PMA	-0.36591	15.1402	-2.13219	0.0491244	0.433912	-4.11348
Q15653	NFKBIB	PMA	-0.769053	11.7673	-2.13052	0.0492814	0.433912	-4.11624
Q9H8T0	AKTIP	PMA	-0.230877	12.1386	-2.12937	0.0493896	0.433912	-4.11814
Q9NX58	LYAR	PMA	-0.509108	12.9481	-2.12861	0.0494619	0.433912	-4.11941
Q86VW2	ARHGEF25	PMA	0.454382	15.0733	2.12805	0.0495147	0.433912	-4.12033
O43303	CCP110	PMA	0.421754	13.3214	2.12788	0.0495303	0.433912	-4.1206
Q96RU2	USP28	PMA	0.663887	12.2796	2.12618	0.0496914	0.433912	-4.12341
Q15910	EZH2	PMA	-0.249815	16.3207	-2.12583	0.0497252	0.433912	-4.124
Q5VWZ2	LYPLAL1	PMA	-0.286616	13.0492	-2.12539	0.0497664	0.433912	-4.12471
Q5JPE7	NOMO2	PMA	0.415578	11.4943	2.12537	0.0497685	0.433912	-4.12475
Q04656	ATP7A	PMA	0.516555	11.4469	2.12525	0.0497802	0.433912	-4.12495
P50452	SERPINB8	PMA	0.188775	18.0464	2.12333	0.049963	0.433912	-4.12812
P48960	ADGRE5	PMA	-0.23648	14.6392	-2.12313	0.0499825	0.433912	-4.12846
O14548	COX7A2L	PMA	0.594179	11.9188	2.12284	0.0500102	0.433912	-4.12894
Q9NXN4	GDAP2	PMA	-0.169469	13.8287	-2.12128	0.0501588	0.433912	-4.1315
Q9NTK5	OLA1	PMA	-0.147474	15.523	-2.12115	0.050171	0.433912	-4.13171
Q14232	EIF2B1	PMA	-0.337392	12.9357	-2.12091	0.0501947	0.433912	-4.13212
Q8TBP5	FAM174A	PMA	-0.802572	9.02339	-2.12052	0.0502321	0.433912	-4.13277
Q9GZY6	LAT2	PMA	-0.392404	12.8121	-2.12038	0.0502455	0.433912	-4.133
Q9BQA1	WDR77	PMA	0.191097	13.5541	2.11835	0.05044	0.433912	-4.13633
P12110	COL6A2	PMA	0.604454	15.3174	2.11825	0.0504493	0.433912	-4.13649
P09234	SNRPC	PMA	-0.481958	11.7747	-2.11561	0.0507048	0.433912	-4.14086
Q8IZ21	PHACTR4	PMA	0.48775	10.9205	2.11528	0.0507368	0.433912	-4.1414
Q9NNW7	TXNRD2	PMA	-0.31491	11.7485	-2.11489	0.0507739	0.433912	-4.14204
P11166	SLC2A1	PMA	0.581769	14.6117	2.11473	0.0507898	0.433912	-4.14231
P09622	DLD	PMA	0.241748	13.8626	2.11347	0.0509115	0.433912	-4.14437
Q6QEF8	CORO6	PMA	-0.330478	15.7103	-2.11321	0.0509373	0.433912	-4.14481
Q96Q05	TRAPPC9	PMA	-0.190118	14.5499	-2.11283	0.0509739	0.433912	-4.14543
P61586	RHOA	PMA	-0.159379	17.7739	-2.1125	0.0510057	0.433912	-4.14597
Q9BXW7	HDHD5	PMA	-0.324849	11.7681	-2.11099	0.0511534	0.433912	-4.14847
Q9NXG2	THUMPD1	PMA	0.320529	12.7718	2.11096	0.0511562	0.433912	-4.14851
P61619	SEC61A1	PMA	0.380747	12.3766	2.10888	0.0513591	0.434314	-4.15193
Q8IZP2		PMA	-0.292723	15.3959	-2.10884	0.0513628	0.434314	-4.15199
Q7L211	ABHD13	PMA	-0.44925	10.3904	-2.10721	0.0515228	0.434318	-4.15468
Q9BXR0	QTRT1	PMA	0.26451	12.3036	2.10668	0.0515748	0.434318	-4.15555
P78318	IGBP1	PMA	-0.268059	13.5154	-2.10499	0.0517409	0.434318	-4.15832
Q15788	NCOA1	PMA	0.44197	10.7415	2.10478	0.0517614	0.434318	-4.15867
Q03426	MVK	PMA	0.221947	12.5059	2.10478	0.0517619	0.434318	-4.15867
Q8IY17	PNPLA6	PMA	0.19756	12.7278	2.10337	0.0519006	0.434318	-4.16098
Q9BXJ8	TMEM120A	PMA	0.330707	13.2864	2.10317	0.0519207	0.434318	-4.16132
P19878	NCF2	PMA	-0.288024	18.5844	-2.10096	0.0521392	0.434325	-4.16494
P26572	MGAT1	PMA	-0.241149	13.667	-2.10064	0.0521707	0.434325	-4.16546
O75400	PRPF40A	PMA	-0.315169	14.2897	-2.10012	0.0522229	0.434325	-4.16632
P43250	GRK6	PMA	-0.248122	14.7708	-2.09994	0.0522404	0.434325	-4.16661
Q5JPF3		PMA	0.824269	14.092	2.09819	0.0524147	0.434325	-4.16949
Q07890	SOS2	PMA	-0.216205	12.5718	-2.09789	0.052445	0.434325	-4.16998
Q8WVJ2	NUDCD2	PMA	0.260692	13.1326	2.09735	0.0524986	0.434325	-4.17086
Q86Y39	NDUFA11	PMA	0.212749	14.2843	2.09647	0.0525868	0.434325	-4.17231
O43252	PAPSS1	PMA	0.267834	13.5547	2.09595	0.0526382	0.434325	-4.17315
Q7Z406	MYH14	PMA	0.582097	17.8987	2.09365	0.0528688	0.434513	-4.17692
Q9UPP1	PHF8	PMA	0.464393	11.2928	2.09342	0.0528921	0.434513	-4.1773
P17844	DDX5	PMA	0.12566	16.5881	2.09267	0.0529679	0.434513	-4.17854
A6NDU8	RIMOC1	PMA	-0.259477	12.5222	-2.09228	0.0530064	0.434513	-4.17916
Q6I9Y2	THOC7	PMA	-0.275751	12.3081	-2.09112	0.0531239	0.434513	-4.18107
Q96JP5	ZFP91	PMA	-0.871568	10.4397	-2.09097	0.053139	0.434513	-4.18132
Q969H8	MYDGF	PMA	-0.228966	15.8086	-2.08913	0.0533254	0.435384	-4.18433
P49336	CDK8	PMA	0.429	12.361	2.08677	0.0535649	0.436167	-4.18819
Q2NL82	TSR1	PMA	0.1578	14.7054	2.0866	0.0535813	0.436167	-4.18846
O75439	PMPCB	PMA	0.263045	11.8659	2.08404	0.0538427	0.436465	-4.19265
Q07954	LRP1	PMA	-0.610141	12.6464	-2.0822	0.0540313	0.436465	-4.19566
O75907	DGAT1	PMA	-0.554743	10.5247	-2.08211	0.0540399	0.436465	-4.1958
P24158	PRTN3	PMA	0.25703	21.6786	2.08141	0.0541124	0.436465	-4.19695
P0CG22		PMA	0.431186	13.1804	2.08096	0.0541587	0.436465	-4.19769
O15228	GNPAT	PMA	-0.265328	12.6837	-2.08084	0.054171	0.436465	-4.19788
Q9P1Y5	CAMSAP3	PMA	-0.458628	15.9188	-2.08034	0.0542224	0.436465	-4.1987
P12955	PEPD	PMA	-0.35565	12.2131	-2.07963	0.0542951	0.436465	-4.19985
Q9C0D3	ZYG11B	PMA	0.282674	10.9385	2.07921	0.054338	0.436465	-4.20053
P52790	HK3	PMA	0.666322	12.1177	2.07627	0.0546421	0.438262	-4.20534
P61106	RAB14	PMA	-0.253457	16.1817	-2.07458	0.0548177	0.439024	-4.2081
P60059	SEC61G	PMA	0.445043	12.6384	2.07344	0.0549353	0.439321	-4.20994
Q9UBV8	PEF1	PMA	0.247057	14.0955	2.06774	0.0555318	0.441914	-4.21923
Q9UBD5	ORC3	PMA	0.520968	10.3441	2.06705	0.0556041	0.441914	-4.22035
P50151	GNG10	PMA	0.547586	12.9325	2.06674	0.0556367	0.441914	-4.22085
Q9Y256	RCE1	PMA	0.341544	10.9064	2.06598	0.055717	0.441914	-4.22209
Q7Z6M1	RABEPK	PMA	-0.345711	11.3425	-2.06525	0.0557944	0.441914	-4.22328
Q9Y5U9	IER3IP1	PMA	0.371809	15.803	2.06479	0.055843	0.441914	-4.22403
Q13200	PSMD2	PMA	0.145129	15.0312	2.0644	0.0558836	0.441914	-4.22466
P46783	RPS10	PMA	0.317651	15.22	2.06417	0.0559077	0.441914	-4.22503
Q9H3U1	UNC45A	PMA	0.183168	14.0983	2.06269	0.0560647	0.442311	-4.22744
P29966	MARCKS	PMA	-0.45623	13.1368	-2.06217	0.0561201	0.442311	-4.22829
P83881	RPL36A	PMA	-0.329724	11.589	-2.05827	0.056535	0.444938	-4.23462
Q9H773	DCTPP1	PMA	0.246984	12.4577	2.05623	0.0567532	0.445252	-4.23792
Q09328	MGAT5	PMA	-0.482299	11.1831	-2.055	0.0568858	0.445252	-4.23993
Q96CP6	GRAMD1A	PMA	-0.212157	14.533	-2.05471	0.0569169	0.445252	-4.2404
Q9NZL4	HSPBP1	PMA	0.206836	12.3711	2.05392	0.0570013	0.445252	-4.24167
Q9ULG6	CCPG1	PMA	-0.371532	10.3557	-2.05384	0.0570103	0.445252	-4.2418
P61224	RAP1B	PMA	-0.250644	19.2666	-2.05266	0.0571379	0.445252	-4.24372
Q9UIF9	BAZ2A	PMA	-0.557681	9.83641	-2.05258	0.0571463	0.445252	-4.24385
Q9Y613	FHOD1	PMA	0.198273	12.7998	2.05098	0.0573188	0.445748	-4.24644
O95793	STAU1	PMA	-0.461613	12.0853	-2.05048	0.0573735	0.445748	-4.24726
Q9UPN6	SCAF8	PMA	-0.336452	12.9621	-2.04874	0.0575621	0.446002	-4.25007
Q14699	RFTN1	PMA	-0.624737	9.46832	-2.04844	0.0575943	0.446002	-4.25055
Q9H4E7	DEF6	PMA	-0.306515	15.373	-2.04701	0.0577495	0.446002	-4.25286
Q9Y3B2	EXOSC1	PMA	-0.321122	11.6547	-2.04632	0.0578255	0.446002	-4.25399
P35914	HMGCL	PMA	-0.339202	11.7387	-2.04591	0.0578694	0.446002	-4.25464
P37287	PIGA	PMA	-0.633436	10.5203	-2.04514	0.0579535	0.446002	-4.25589
Q7LFX5	CHST15	PMA	-0.443133	10.4579	-2.04491	0.0579787	0.446002	-4.25626
Q8N7H5	PAF1	PMA	0.267334	14.828	2.04194	0.0583044	0.447448	-4.26106
Q7Z7A4	PXK	PMA	-0.294209	12.9826	-2.03988	0.0585316	0.447448	-4.2644
Q9BWD1	ACAT2	PMA	0.182811	15.4254	2.03907	0.0586206	0.447448	-4.2657
Q14667	BLTP2	PMA	0.288747	13.0196	2.03753	0.0587911	0.447448	-4.26819
Q9NRH3	TUBG2	PMA	0.685998	13.5001	2.03739	0.0588062	0.447448	-4.26841
Q96CQ1	SLC25A36	PMA	0.37471	13.7228	2.03697	0.0588525	0.447448	-4.26908
P24390	KDELR1	PMA	-0.817585	10.9679	-2.03686	0.0588655	0.447448	-4.26927
Q9H1B7	IRF2BPL	PMA	0.291188	11.0512	2.03679	0.0588728	0.447448	-4.26938
Q5TFE4	NT5DC1	PMA	-0.314228	12.2092	-2.0365	0.058905	0.447448	-4.26985
Q92520	FAM3C	PMA	0.310511	17.4793	2.03142	0.0594708	0.447929	-4.27804
Q8IUC8	GALNT13	PMA	0.499477	13.1537	2.03121	0.0594947	0.447929	-4.27838
Q9NVE7	PANK4	PMA	0.206034	12.5002	2.03114	0.0595015	0.447929	-4.27848
P17612	PRKACA	PMA	0.224631	15.345	2.0307	0.0595513	0.447929	-4.2792
P23610	F8A1	PMA	0.390222	12.0017	2.03068	0.0595536	0.447929	-4.27923
Q9BS26	ERP44	PMA	-0.196984	15.3719	-2.03026	0.0596008	0.447929	-4.27991
Q8WXI2	CNKSR2	PMA	-0.379583	10.7447	-2.02932	0.0597061	0.447929	-4.28142
Q86Y37	CACUL1	PMA	0.340343	10.8654	2.02914	0.0597267	0.447929	-4.28172
O43294	TGFB1I1	PMA	0.289556	11.6654	2.02908	0.0597329	0.447929	-4.28181
P49427	CDC34	PMA	-0.289504	11.3716	-2.02798	0.0598565	0.447929	-4.28358
Q96IU4	ABHD14B	PMA	-0.379866	15.4654	-2.02743	0.0599182	0.447929	-4.28446
Q6Y1H2	HACD2	PMA	-0.431377	11.8373	-2.02712	0.0599539	0.447929	-4.28497
Q6NXE6	ARMC6	PMA	0.25032	11.6781	2.02537	0.0601513	0.448376	-4.28778
Q7L5Y1	ENOSF1	PMA	0.419267	11.0531	2.02511	0.0601806	0.448376	-4.2882
Q5T280	SPOUT1	PMA	-0.405429	11.8958	-2.0244	0.0602604	0.448376	-4.28933
Q92542	NCSTN	PMA	0.180524	13.991	2.02293	0.0604269	0.448541	-4.29169
Q96CM8	ACSF2	PMA	0.222293	11.5041	2.02276	0.060447	0.448541	-4.29198
Q9Y3D2	MSRB2	PMA	0.327868	12.4215	2.02052	0.0607011	0.449785	-4.29557
Q01518	CAP1	PMA	0.153379	20.1854	2.01949	0.060819	0.449785	-4.29723
Q3T8J9	GON4L	PMA	-0.667124	10.0069	-2.01863	0.0609171	0.449785	-4.29861
Q9UBB5	MBD2	PMA	-0.565151	12.4933	-2.01839	0.0609445	0.449785	-4.29899
Q9Y6M9	NDUFB9	PMA	-0.356163	11.576	-2.017	0.0611041	0.449868	-4.30123
I3L3R5	CCER2	PMA	-0.65775	12.039	-2.0165	0.0611612	0.449868	-4.30203
Q8NCE2	MTMR14	PMA	-0.239375	12.0218	-2.01613	0.0612032	0.449868	-4.30261
Q8NG11	TSPAN14	PMA	-0.538987	13.9594	-2.01508	0.0613239	0.450149	-4.3043
Q9H0Z9	RBM38	PMA	0.820574	15.6689	2.01335	0.0615238	0.451009	-4.30708
Q92878	RAD50	PMA	-0.286261	15.1688	-2.01135	0.0617551	0.451099	-4.31029
Q9Y3E1	HDGFL3	PMA	-0.555043	10.74	-2.01016	0.0618924	0.451099	-4.31219
Q14BN4	SLMAP	PMA	-0.258265	12.2881	-2.00993	0.0619195	0.451099	-4.31256
O75298	RTN2	PMA	-0.490193	11.2557	-2.00855	0.0620798	0.451099	-4.31477
Q8IZP0	ABI1	PMA	0.265584	13.9008	2.00843	0.0620934	0.451099	-4.31496
Q8N884	CGAS	PMA	-0.314661	12.3364	-2.00829	0.0621097	0.451099	-4.31518
O14964	HGS	PMA	-0.203609	15.1076	-2.00795	0.0621497	0.451099	-4.31573
O43765	SGTA	PMA	0.188478	14.0631	2.00754	0.0621977	0.451099	-4.31639
Q9NQG7	HPS4	PMA	-0.593319	12.8843	-2.00657	0.0623108	0.451319	-4.31794
P20248	CCNA2	PMA	-1.04646	13.5215	-2.00354	0.0626651	0.451582	-4.32279
O95376	ARIH2	PMA	-0.29094	11.3871	-2.003	0.0627279	0.451582	-4.32364
P16220	CREB1	PMA	0.271418	13.7017	2.00227	0.0628145	0.451582	-4.32482
P12236	SLC25A6	PMA	0.268099	14.0735	2.00094	0.0629705	0.451582	-4.32694
Q8IWB9	TEX2	PMA	-0.360527	12.0902	-1.99992	0.0630915	0.451582	-4.32858
Q9UL18	AGO1	PMA	-0.184153	12.8273	-1.99949	0.0631414	0.451582	-4.32925
Q13148	TARDBP	PMA	-0.258925	14.6429	-1.99858	0.0632492	0.451582	-4.33071
P50238	CRIP1	PMA	-0.486208	14.0353	-1.99766	0.0633584	0.451582	-4.33218
Q08AF3	SLFN5	PMA	0.278317	12.4994	1.9974	0.0633887	0.451582	-4.33259
P61457	PCBD1	PMA	0.232626	13.5827	1.99696	0.0634412	0.451582	-4.33329
P27348	YWHAQ	PMA	-0.315528	16.0373	-1.99465	0.0637161	0.451582	-4.33698
P37840	SNCA	PMA	0.407511	12.523	1.99385	0.0638116	0.451582	-4.33826
Q7L7X3	TAOK1	PMA	-0.285186	11.5635	-1.99323	0.063885	0.451582	-4.33924
P04233	CD74	PMA	0.331064	12.774	1.99158	0.0640818	0.451582	-4.34186
Q9H1C4	UNC93B1	PMA	-0.460863	11.8903	-1.99054	0.0642074	0.451582	-4.34353
Q9UBP0	SPAST	PMA	0.27545	12.9031	1.99037	0.0642275	0.451582	-4.3438
Q8WXD9	CASKIN1	PMA	-0.214732	15.8755	-1.99029	0.0642369	0.451582	-4.34393
P02748	C9	PMA	0.650414	11.6056	1.98985	0.0642898	0.451582	-4.34463
Q9UP95	SLC12A4	PMA	0.218608	13.0426	1.98977	0.0642999	0.451582	-4.34476
O95674	CDS2	PMA	-0.373572	13.2515	-1.98971	0.0643065	0.451582	-4.34485
Q6ZN16	MAP3K15	PMA	-0.513407	12.0524	-1.98952	0.0643297	0.451582	-4.34516
Q9BTU6	PI4K2A	PMA	0.296237	12.2016	1.98689	0.0646457	0.451582	-4.34933
Q9BSL1	UBAC1	PMA	0.345094	14.0769	1.98673	0.0646657	0.451582	-4.3496
O15431	SLC31A1	PMA	-0.472265	13.3189	-1.98456	0.0649283	0.451582	-4.35305
P31483	TIA1	PMA	0.161089	14.6561	1.98417	0.064975	0.451582	-4.35367
Q14624	ITIH4	PMA	0.344698	13.6626	1.98381	0.0650184	0.451582	-4.35423
P35611	ADD1	PMA	0.19872	15.3312	1.98258	0.0651682	0.451582	-4.3562
Q9NX55	HYPK	PMA	-0.587017	9.74971	-1.98096	0.065365	0.451582	-4.35876
O95295	SNAPIN	PMA	-0.274073	14.076	-1.98077	0.0653883	0.451582	-4.35907
O00303	EIF3F	PMA	0.191698	14.8804	1.98044	0.065429	0.451582	-4.3596
Q9H3S1	SEMA4A	PMA	-0.62232	11.3534	-1.97912	0.0655893	0.451582	-4.36168
Q96M96	FGD4	PMA	-0.201943	17.4049	-1.97907	0.065596	0.451582	-4.36177
P63172	DYNLT1	PMA	-0.7898	11.4665	-1.97868	0.0656433	0.451582	-4.36238
Q5VU43	PDE4DIP	PMA	-0.332976	11.8566	-1.97794	0.0657348	0.451582	-4.36357
Q9BWT3	PAPOLG	PMA	0.293963	12.582	1.97738	0.0658031	0.451582	-4.36445
Q13043	STK4	PMA	-0.261832	16.3312	-1.97733	0.0658087	0.451582	-4.36453
Q9Y5X0	SNX10	PMA	-0.797045	8.89871	-1.97692	0.0658598	0.451582	-4.36519
Q9HC35	EML4	PMA	0.192598	14.1868	1.97685	0.0658679	0.451582	-4.36529
Q5RI15	COX20	PMA	0.284215	11.0738	1.97631	0.0659344	0.451582	-4.36615
P14316	IRF2	PMA	-0.499602	11.0409	-1.97619	0.065949	0.451582	-4.36634
Q6UUV7	CRTC3	PMA	0.510219	10.415	1.97548	0.0660365	0.451582	-4.36747
Q15700	DLG2	PMA	-0.616087	10.9044	-1.97487	0.0661109	0.451582	-4.36842
Q9NUK0	MBNL3	PMA	-0.488674	12.1686	-1.97368	0.0662583	0.451582	-4.37032
Q96CD0	FBXL8	PMA	0.286337	11.3313	1.97344	0.0662879	0.451582	-4.3707
Q6UXV4	APOOL	PMA	-0.21903	12.3949	-1.97312	0.0663266	0.451582	-4.3712
Q8TCT8	SPPL2A	PMA	-0.680295	11.9209	-1.97109	0.0665783	0.451582	-4.37442
Q96E11	MRRF	PMA	0.302602	11.6222	1.97078	0.0666163	0.451582	-4.37491
O75334	PPFIA2	PMA	-0.375744	14.9969	-1.97027	0.0666798	0.451582	-4.37572
Q9NXE4	SMPD4	PMA	0.189787	13.7877	1.9702	0.0666891	0.451582	-4.37584
P07332	FES	PMA	-0.205961	15.0711	-1.97	0.0667138	0.451582	-4.37615
Q9UBS0	RPS6KB2	PMA	-0.311235	11.8274	-1.96997	0.0667167	0.451582	-4.37619
Q96I99	SUCLG2	PMA	0.204375	13.8267	1.96995	0.0667195	0.451582	-4.37622
P36543	ATP6V1E1	PMA	0.290555	14.6419	1.96982	0.0667355	0.451582	-4.37643
P07099	EPHX1	PMA	0.349111	14.1975	1.96899	0.0668395	0.451726	-4.37775
O95602	POLR1A	PMA	-0.321418	14.921	-1.96692	0.067097	0.452674	-4.38102
P78383	SLC35B1	PMA	0.347172	11.376	1.96653	0.0671459	0.452674	-4.38164
P62244	RPS15A	PMA	0.363876	16.108	1.96487	0.0673531	0.453511	-4.38426
Q9NRW7	VPS45	PMA	0.165672	12.2534	1.96362	0.0675095	0.453831	-4.38623
P28340	POLD1	PMA	0.472907	10.2381	1.96316	0.0675671	0.453831	-4.38696
Q9UM00	TMCO1	PMA	0.313285	13.9369	1.96171	0.0677501	0.4545	-4.38926
P62979	RPS27A	PMA	-0.452713	12.0866	-1.96081	0.0678634	0.454701	-4.39068
Q14247	CTTN	PMA	-0.241849	12.3213	-1.95974	0.0679979	0.454851	-4.39236
Q9BY44	EIF2A	PMA	-0.164868	12.409	-1.95884	0.0681123	0.454851	-4.39379
Q9ULC5	ACSL5	PMA	-0.369134	13.6453	-1.95865	0.0681359	0.454851	-4.39408
Q8WVT3	TRAPPC12	PMA	0.210208	12.9911	1.95717	0.0683231	0.455543	-4.39642
Q6NYC8	PPP1R18	PMA	0.290069	13.8518	1.9558	0.0684976	0.455815	-4.39858
Q16658	FSCN1	PMA	-0.229868	11.4351	-1.95533	0.0685579	0.455815	-4.39933
P07948	LYN	PMA	-0.206671	16.3573	-1.95447	0.0686673	0.455815	-4.40068
Q9H061	TMEM126A	PMA	0.321829	12.5095	1.95422	0.0686982	0.455815	-4.40106
P63165	SUMO1	PMA	0.354368	14.8455	1.95131	0.0690705	0.457112	-4.40565
P21291	CSRP1	PMA	0.23915	13.9876	1.95099	0.0691113	0.457112	-4.40616
Q92817	EVPL	PMA	-0.302976	16.1343	-1.95018	0.0692148	0.457112	-4.40743
Q96EP5	DAZAP1	PMA	-0.396329	14.0837	-1.95007	0.069229	0.457112	-4.4076
Q13825	AUH	PMA	0.228651	12.1328	1.94771	0.0695329	0.457469	-4.41132
P07737	PFN1	PMA	0.242726	20.8105	1.94666	0.0696682	0.457469	-4.41297
Q96DI7	SNRNP40	PMA	-0.191845	12.8083	-1.94665	0.0696698	0.457469	-4.41299
Q15269	PWP2	PMA	0.626983	11.1988	1.94652	0.0696865	0.457469	-4.41319
Q96T88	UHRF1	PMA	0.292799	17.1463	1.9464	0.0697024	0.457469	-4.41338
P48448		PMA	-0.697525	15.5804	-1.94446	0.0699532	0.457689	-4.41643
Q00653	NFKB2	PMA	0.198714	13.4328	1.94441	0.06996	0.457689	-4.41651
Q9H6Q3	SLA2	PMA	-0.389457	9.79856	-1.94338	0.0700929	0.457689	-4.41812
G9CGD6		PMA	0.418213	12.5639	1.94315	0.0701225	0.457689	-4.41848
P60510	PPP4C	PMA	-0.19776	12.8661	-1.9427	0.0701811	0.457689	-4.41919
Q96AD5	PNPLA2	PMA	-0.3443	10.4369	-1.94225	0.0702394	0.457689	-4.41989
Q12980	NPRL3	PMA	0.414878	10.1986	1.94122	0.070374	0.458019	-4.42152
P68371	TUBB4B	PMA	-0.683775	15.6359	-1.94036	0.070486	0.458201	-4.42286
O43752	STX6	PMA	0.233825	11.8026	1.93856	0.0707219	0.458832	-4.4257
O60925	PFDN1	PMA	-0.144901	14.1077	-1.93833	0.0707514	0.458832	-4.42605
Q13813	SPTAN1	PMA	-0.198436	16.7989	-1.93721	0.070898	0.459237	-4.4278
Q00325	SLC25A3	PMA	-0.206728	16.875	-1.93324	0.0714208	0.461186	-4.43403
P62312	LSM6	PMA	0.357719	14.3656	1.93305	0.0714455	0.461186	-4.43432
Q9NVZ3	NECAP2	PMA	0.186755	14.0727	1.93267	0.0714961	0.461186	-4.43492
Q6N043	ZNF280D	PMA	0.456978	15	1.93196	0.0715899	0.461186	-4.43603
P31689	DNAJA1	PMA	-0.306011	14.0993	-1.93172	0.0716216	0.461186	-4.43641
Q9H6Q4	CIAO3	PMA	0.397474	11.3925	1.92931	0.0719409	0.462641	-4.44018
P25787	PSMA2	PMA	-0.462482	15.214	-1.92874	0.0720173	0.462641	-4.44107
P08237	PFKM	PMA	-0.202025	14.227	-1.92779	0.0721428	0.462902	-4.44255
Q96JJ7	TMX3	PMA	-0.312134	13.6689	-1.92635	0.0723355	0.463466	-4.44481
P0CJ78	ZNF865	PMA	-0.541464	9.88332	-1.92586	0.0724006	0.463466	-4.44557
Q8IYQ7	THNSL1	PMA	0.585624	11.2855	1.92414	0.0726316	0.464278	-4.44826
P07738	BPGM	PMA	0.346438	13.861	1.92364	0.0726978	0.464278	-4.44903
Q49AM3	TTC31	PMA	0.2624	16.7345	1.92066	0.0730993	0.466296	-4.45369
Q13163	MAP2K5	PMA	-0.558217	9.50911	-1.91938	0.0732715	0.466849	-4.45568
Q66LE6	PPP2R2D	PMA	0.529699	12.3566	1.91822	0.073428	0.467255	-4.45749
P14174	MIF	PMA	0.250542	20.0717	1.91764	0.0735066	0.467255	-4.45839
Q13164	MAPK7	PMA	-0.197953	14.5471	-1.91447	0.0739373	0.469116	-4.46333
Q14166	TTLL12	PMA	-0.207812	15.3201	-1.91422	0.0739713	0.469116	-4.46372
P02771	AFP	PMA	0.643069	12.9222	1.9118	0.0743017	0.469234	-4.46749
Q9NX14	NDUFB11	PMA	0.490346	10.9139	1.91169	0.0743169	0.469234	-4.46766
Q9NYL9	TMOD3	PMA	-0.180166	15.4811	-1.91167	0.0743197	0.469234	-4.46769
Q99805	TM9SF2	PMA	-0.188175	13.4033	-1.91156	0.0743341	0.469234	-4.46785
O14526	FCHO1	PMA	0.209146	12.7529	1.90967	0.0745942	0.470332	-4.4708
Q7RTS9	DYM	PMA	0.301348	11.781	1.90799	0.0748241	0.471236	-4.4734
O43865	AHCYL1	PMA	0.254356	12.3848	1.90671	0.0750004	0.471802	-4.47539
Q15631	TSN	PMA	-0.360641	15.7446	-1.90279	0.0755434	0.473892	-4.48148
Q9UI30	TRMT112	PMA	0.311274	12.5382	1.90108	0.0757819	0.473892	-4.48414
Q9Y6K9	IKBKG	PMA	-0.298468	13.7328	-1.90075	0.0758267	0.473892	-4.48464
P26885	FKBP2	PMA	-0.405384	15.8043	-1.90067	0.0758381	0.473892	-4.48477
Q01780	EXOSC10	PMA	0.288813	11.5297	1.89966	0.0759798	0.473892	-4.48634
Q8IUR0	TRAPPC5	PMA	0.262166	12.9482	1.8995	0.0760017	0.473892	-4.48658
P11215	ITGAM	PMA	-0.144485	18.8139	-1.89933	0.0760258	0.473892	-4.48685
Q7Z2E3	APTX	PMA	0.327304	11.1579	1.89931	0.0760278	0.473892	-4.48687
Q02241	KIF23	PMA	0.34729	15.6709	1.8962	0.0764629	0.47606	-4.49169
P45983	MAPK8	PMA	-0.180602	13.5249	-1.89522	0.0766004	0.476372	-4.4932
Q6ZWT7	MBOAT2	PMA	-0.207078	14.0906	-1.89441	0.0767144	0.476538	-4.49446
Q96GC9	VMP1	PMA	-0.379237	12.2376	-1.893	0.0769133	0.47723	-4.49664
O94921	CDK14	PMA	0.486739	10.5365	1.89213	0.077036	0.477245	-4.49798
P49755	TMED10	PMA	0.275456	15.7036	1.89175	0.0770908	0.477245	-4.49858
Q92854	SEMA4D	PMA	-0.221668	12.6223	-1.88976	0.0773718	0.477521	-4.50165
Q9BQ67	GRWD1	PMA	0.398142	10.9056	1.88888	0.0774974	0.477521	-4.50301
Q9Y616	IRAK3	PMA	-0.304028	12.9158	-1.88864	0.0775304	0.477521	-4.50337
Q2VPB7	AP5B1	PMA	0.359624	11.8145	1.88821	0.0775922	0.477521	-4.50404
P49721	PSMB2	PMA	0.206744	15.915	1.88807	0.0776123	0.477521	-4.50426
Q86VQ1	GLCCI1	PMA	0.51442	10.1461	1.88773	0.0776607	0.477521	-4.50479
O14867	BACH1	PMA	-0.367481	12.2315	-1.88565	0.0779565	0.478801	-4.50799
Q5JSP0	FGD3	PMA	-0.171368	16.0107	-1.88434	0.0781448	0.479417	-4.51002
Q96A33	CCDC47	PMA	-0.288894	14.2168	-1.8837	0.0782356	0.479435	-4.511
A0A075B759	PPIAL4F	PMA	0.548287	18.6002	1.88247	0.0784126	0.47998	-4.5129
Q9UGV2	NDRG3	PMA	0.252532	11.9377	1.88008	0.0787557	0.480913	-4.51658
Q5TBB1	RNASEH2B	PMA	-0.28254	11.3358	-1.87972	0.0788079	0.480913	-4.51713
Q9BXK5	BCL2L13	PMA	0.158163	14.9612	1.87886	0.0789314	0.480913	-4.51845
Q8NBM8	PCYOX1L	PMA	0.295423	12.6517	1.87851	0.0789826	0.480913	-4.519
P13693	TPT1	PMA	-0.333375	14.1211	-1.87835	0.0790058	0.480913	-4.51924
Q9UKA9	PTBP2	PMA	0.618573	15.0014	1.87487	0.0795099	0.48242	-4.52459
O14607	UTY	PMA	0.550858	10.9722	1.87486	0.0795106	0.48242	-4.5246
Q96TA1	NIBAN2	PMA	-0.452821	10.0695	-1.87416	0.0796128	0.48242	-4.52568
O95777	LSM8	PMA	-0.539338	11.5065	-1.87131	0.080028	0.48242	-4.53005
Q10469	MGAT2	PMA	-0.302544	11.8882	-1.87112	0.0800569	0.48242	-4.53036
P49419	ALDH7A1	PMA	0.384184	11.7705	1.86975	0.0802575	0.48242	-4.53246
P27701	CD82	PMA	-0.837941	14.0903	-1.86947	0.0802982	0.48242	-4.53289
Q15075	EEA1	PMA	-0.164995	14.1871	-1.86909	0.0803539	0.48242	-4.53347
Q96RS6	NUDCD1	PMA	0.214357	12.0047	1.86891	0.0803796	0.48242	-4.53374
Q9Y3F4	STRAP	PMA	-0.268161	13.443	-1.8687	0.0804111	0.48242	-4.53407
Q14789	GOLGB1	PMA	-0.257356	12.6889	-1.8682	0.0804841	0.48242	-4.53483
P56134	ATP5MF	PMA	-0.218714	17.9828	-1.86759	0.0805745	0.48242	-4.53577
Q15717	ELAVL1	PMA	0.178127	14.6027	1.86676	0.0806954	0.48242	-4.53703
P47755	CAPZA2	PMA	-0.407005	16.3141	-1.86668	0.0807084	0.48242	-4.53717
P09104	ENO2	PMA	0.417807	17.3336	1.86616	0.0807845	0.48242	-4.53796
Q13530	SERINC3	PMA	-0.407393	12.7655	-1.86616	0.0807853	0.48242	-4.53797
Q9H814	PHAX	PMA	0.568103	10.8988	1.86583	0.0808337	0.48242	-4.53847
Q9UJX3	ANAPC7	PMA	-0.213313	12.321	-1.86479	0.0809865	0.48242	-4.54006
Q15853	USF2	PMA	-0.455159	13.0358	-1.86426	0.0810654	0.48242	-4.54088
Q5SR53		PMA	0.461405	15.4149	1.86415	0.0810815	0.48242	-4.54104
P52564	MAP2K6	PMA	0.197761	13.3064	1.86395	0.081111	0.48242	-4.54135
A3KN83	SBNO1	PMA	-0.192992	12.039	-1.86224	0.0813638	0.483397	-4.54396
Q04759	PRKCQ	PMA	0.451263	16.0947	1.85932	0.0817984	0.484389	-4.54843
Q9H7M9	VSIR	PMA	-0.31826	13.8322	-1.85885	0.0818686	0.484389	-4.54915
Q6DN03		PMA	-0.616921	16.9598	-1.85844	0.0819304	0.484389	-4.54979
P55201	BRPF1	PMA	-0.244876	14.2623	-1.85791	0.0820084	0.484389	-4.55058
P32189	GK	PMA	0.259985	12.7251	1.85705	0.0821368	0.484389	-4.5519
Q9Y5K8	ATP6V1D	PMA	-0.404699	12.7824	-1.85703	0.0821408	0.484389	-4.55194
Q5J8M3	EMC4	PMA	-0.347937	10.956	-1.85695	0.0821525	0.484389	-4.55206
Q9Y385	UBE2J1	PMA	0.408697	10.8015	1.8554	0.0823844	0.48445	-4.55442
Q8IYB3	SRRM1	PMA	-0.189715	13.7826	-1.85511	0.0824284	0.48445	-4.55487
P22304	IDS	PMA	-0.41056	10.5737	-1.8551	0.0824293	0.48445	-4.55488
P06241	FYN	PMA	-0.497364	11.754	-1.85417	0.0825686	0.484492	-4.55629
Q15648	MED1	PMA	0.235246	11.5868	1.85387	0.0826142	0.484492	-4.55676
Q9Y4W6	AFG3L2	PMA	0.169214	12.8454	1.85108	0.0830353	0.486049	-4.56102
Q9NS15	LTBP3	PMA	0.545475	11.9193	1.85093	0.0830579	0.486049	-4.56125
Q96EE4	CCDC126	PMA	-0.57025	10.4646	-1.84897	0.0833546	0.487187	-4.56424
Q14141	SEPTIN6	PMA	-0.396393	15.8122	-1.84793	0.0835123	0.487187	-4.56582
Q15904	ATP6AP1	PMA	0.149923	14.9617	1.84787	0.0835203	0.487187	-4.5659
P18065	IGFBP2	PMA	0.464704	10.5434	1.84705	0.0836448	0.487392	-4.56715
Q00169	PITPNA	PMA	-0.172233	15.5131	-1.84535	0.0839037	0.488379	-4.56974
A6NHL2	TUBAL3	PMA	0.537829	12.9387	1.84444	0.0840438	0.488595	-4.57114
P60891	PRPS1	PMA	0.205169	14.4895	1.84394	0.0841201	0.488595	-4.5719
Q7L622	G2E3	PMA	-0.522297	12.9012	-1.84248	0.0843422	0.489251	-4.57411
Q9BQD3	KXD1	PMA	0.205098	12.91	1.84203	0.0844123	0.489251	-4.5748
P29218	IMPA1	PMA	0.178483	15.6147	1.84059	0.0846331	0.49001	-4.57699
O60832	DKC1	PMA	0.127987	14.8548	1.83996	0.0847303	0.490052	-4.57795
P06899	H2BC11	PMA	-0.552065	21.7296	-1.83801	0.0850298	0.490446	-4.5809
O14639	ABLIM1	PMA	0.365193	11.5142	1.8376	0.0850936	0.490446	-4.58153
P20042	EIF2S2	PMA	0.241064	13.59	1.83753	0.0851037	0.490446	-4.58163
P52895	AKR1C2	PMA	-0.469332	10.8041	-1.83602	0.0853372	0.490446	-4.58392
Q9Y2X8	UBE2D4	PMA	-1.03821	13.0559	-1.83489	0.0855118	0.490446	-4.58563
Q9Y336	SIGLEC9	PMA	-0.717994	11.5553	-1.83441	0.0855873	0.490446	-4.58637
O60888	CUTA	PMA	0.225253	16.2209	1.83303	0.0858015	0.490446	-4.58846
Q9NRD5	PICK1	PMA	-0.365829	12.1509	-1.83283	0.0858321	0.490446	-4.58876
Q9Y4F3	MARF1	PMA	0.328829	10.9101	1.83283	0.085833	0.490446	-4.58877
Q8N5J2	MINDY1	PMA	-0.220125	13.668	-1.83282	0.0858343	0.490446	-4.58878
O75449	KATNA1	PMA	0.356444	11.8122	1.83206	0.0859522	0.490446	-4.58993
Q9NZL9	MAT2B	PMA	-0.153877	16.3807	-1.83137	0.0860591	0.490446	-4.59097
O00764	PDXK	PMA	-0.189758	14.5781	-1.83121	0.0860849	0.490446	-4.59122
Q15084	PDIA6	PMA	-0.143945	16.4127	-1.83087	0.0861372	0.490446	-4.59173
P50990	CCT8	PMA	0.133138	16.0485	1.83081	0.0861473	0.490446	-4.59182
Q8TF42	UBASH3B	PMA	-0.206888	13.7041	-1.82879	0.0864621	0.490696	-4.59487
Q96FH0	BORCS8	PMA	0.217503	12.4976	1.82831	0.0865373	0.490696	-4.5956
Q9H0F7	ARL6	PMA	0.544509	9.87771	1.82757	0.0866544	0.490696	-4.59673
Q8TCD5	NT5C	PMA	-0.435161	10.4127	-1.82733	0.0866909	0.490696	-4.59708
Q6EEV6	SUMO4	PMA	-0.334991	12.4269	-1.82661	0.0868043	0.490696	-4.59817
Q96F07	CYFIP2	PMA	0.137408	16.4589	1.8265	0.0868214	0.490696	-4.59834
Q96JN0	LCOR	PMA	-0.47078	12.5344	-1.82627	0.0868589	0.490696	-4.5987
P21108	PRPS1L1	PMA	0.247899	15.7532	1.82593	0.086911	0.490696	-4.5992
Q9Y286	SIGLEC7	PMA	-0.527596	9.8713	-1.82411	0.087199	0.491813	-4.60196
Q9Y3C0	WASHC3	PMA	0.312996	12.4004	1.82302	0.0873701	0.492037	-4.6036
Q8WW59	SPRYD4	PMA	0.185099	12.7499	1.8225	0.0874531	0.492037	-4.60439
A6NC98	CCDC88B	PMA	-0.207675	14.8858	-1.82214	0.0875093	0.492037	-4.60493
Q13523	PRPF4B	PMA	0.206469	12.5431	1.82119	0.0876597	0.492375	-4.60637
Q05209	PTPN12	PMA	-0.212637	14.1975	-1.81894	0.0880171	0.493874	-4.60976
Q9NRP0	OSTC	PMA	0.147109	13.9555	1.81796	0.0881739	0.494151	-4.61125
Q9HA64	FN3KRP	PMA	-0.312428	14.2388	-1.81646	0.0884132	0.494151	-4.61351
P17275	JUNB	PMA	0.900756	10.189	1.81638	0.0884254	0.494151	-4.61362
Q9BV73	CEP250	PMA	-0.241566	15.1667	-1.81597	0.08849	0.494151	-4.61423
Q15034	HERC3	PMA	0.225172	12.0685	1.81579	0.0885195	0.494151	-4.61451
Q14186	TFDP1	PMA	-0.605456	9.5224	-1.81456	0.0887167	0.494271	-4.61637
Q96GQ7	DDX27	PMA	0.341149	10.5616	1.81451	0.0887248	0.494271	-4.61644
Q02338	BDH1	PMA	0.236092	14.5057	1.81395	0.0888133	0.494271	-4.61728
Q9UKF6	CPSF3	PMA	-0.176824	16.5956	-1.81339	0.0889036	0.494271	-4.61812
Q9NXC2	GFOD1	PMA	0.248448	12.3293	1.81253	0.0890417	0.494535	-4.61942
Q9HCD5	NCOA5	PMA	-0.207082	12.3934	-1.81173	0.0891712	0.49475	-4.62063
Q06136	KDSR	PMA	0.331108	11.5836	1.81078	0.0893231	0.494871	-4.62205
P40227	CCT6A	PMA	0.139466	15.4919	1.81009	0.0894346	0.494871	-4.62309
O94973	AP2A2	PMA	-0.151553	14.5504	-1.80947	0.0895353	0.494871	-4.62403
O15355	PPM1G	PMA	-0.339701	12.842	-1.80934	0.0895559	0.494871	-4.62422
Q9H2P0	ADNP	PMA	0.420442	10.2086	1.80864	0.0896693	0.494997	-4.62527
P61966	AP1S1	PMA	0.300631	12.0272	1.80666	0.0899902	0.496061	-4.62825
Q92851	CASP10	PMA	0.158211	14.3479	1.80555	0.0901692	0.496061	-4.62991
O15533	TAPBP	PMA	0.169672	14.3436	1.80552	0.090174	0.496061	-4.62995
O00189	AP4M1	PMA	-0.327158	11.8731	-1.80449	0.0903421	0.496061	-4.6315
P13987	CD59	PMA	-0.607341	14.7813	-1.80401	0.0904211	0.496061	-4.63223
P49441	INPP1	PMA	0.28618	11.8907	1.80219	0.0907178	0.496061	-4.63496
Q5W0V3	FHIP2A	PMA	0.146475	16.5242	1.80106	0.0909018	0.496061	-4.63665
Q8WU39	MZB1	PMA	-0.306856	12.1399	-1.80048	0.0909971	0.496061	-4.63752
P00558	PGK1	PMA	0.14357	19.1922	1.79894	0.091249	0.496061	-4.63982
P51159	RAB27A	PMA	0.377879	16.9214	1.79837	0.0913438	0.496061	-4.64068
P80723	BASP1	PMA	-0.521412	15.8677	-1.79805	0.0913962	0.496061	-4.64116
Q3KQV9	UAP1L1	PMA	0.591041	11.9569	1.79712	0.0915492	0.496061	-4.64255
Q9Y316	MEMO1	PMA	-0.221916	13.7838	-1.7954	0.0918331	0.496061	-4.64513
Q8WWI5	SLC44A1	PMA	-0.470531	14.6838	-1.79505	0.0918906	0.496061	-4.64565
Q86VN1	VPS36	PMA	0.148741	13.8468	1.79494	0.0919093	0.496061	-4.64582
Q5QJ74	TBCEL	PMA	-0.343394	11.393	-1.79428	0.0920172	0.496061	-4.64679
P00747	PLG	PMA	0.29259	12.2954	1.79388	0.0920844	0.496061	-4.6474
P62873	GNB1	PMA	0.25295	17.223	1.79366	0.0921201	0.496061	-4.64772
P82663	MRPS25	PMA	0.386887	10.529	1.79311	0.0922121	0.496061	-4.64855
Q9UGI8	TES	PMA	0.183243	14.9911	1.79307	0.0922177	0.496061	-4.64861
Q13126	MTAP	PMA	0.116257	14.3182	1.79287	0.0922511	0.496061	-4.64891
P55212	CASP6	PMA	0.135936	13.1791	1.79265	0.0922882	0.496061	-4.64924
Q9NVH2	INTS7	PMA	-0.215342	12.062	-1.79227	0.0923511	0.496061	-4.64981
Q8IU68	TMC8	PMA	-0.419179	12.9112	-1.79219	0.0923645	0.496061	-4.64993
P68363	TUBA1B	PMA	-0.239182	18.9615	-1.79164	0.0924545	0.496061	-4.65074
Q9H0R4	HDHD2	PMA	0.204363	15.0164	1.7916	0.0924619	0.496061	-4.6508
Q96EK6	GNPNAT1	PMA	0.23007	11.6955	1.79136	0.0925018	0.496061	-4.65116
P54252	ATXN3	PMA	0.35221	13.0163	1.7911	0.0925445	0.496061	-4.65155
Q9UL42	PNMA2	PMA	0.95384	12.5897	1.7909	0.0925785	0.496061	-4.65185
P02750	LRG1	PMA	-0.326374	14.3449	-1.79082	0.0925907	0.496061	-4.65196
P09429	HMGB1	PMA	-0.656638	17.6844	-1.78924	0.0928544	0.496597	-4.65433
P02794	FTH1	PMA	0.169948	12.4762	1.78913	0.092873	0.496597	-4.65449
P61353	RPL27	PMA	-0.463573	13.1023	-1.78829	0.0930126	0.49682	-4.65574
P13598	ICAM2	PMA	0.556304	10.4123	1.78779	0.0930968	0.49682	-4.65649
P50993	ATP1A2	PMA	-0.292641	12.595	-1.78537	0.0935015	0.498337	-4.6601
Q9UK76	JPT1	PMA	-0.368494	13.1195	-1.785	0.0935639	0.498337	-4.66065
Q9H583	HEATR1	PMA	0.292483	11.55	1.7835	0.0938159	0.498557	-4.66288
O15400	STX7	PMA	-0.221271	16.0453	-1.78324	0.0938592	0.498557	-4.66327
P31948	STIP1	PMA	0.143266	16.7871	1.78283	0.0939289	0.498557	-4.66388
P57772	EEFSEC	PMA	-0.193717	13.5905	-1.78212	0.0940492	0.498557	-4.66495
Q9BY43	CHMP4A	PMA	-0.227079	12.2357	-1.78204	0.0940623	0.498557	-4.66506
Q96NY7	CLIC6	PMA	-1.03992	12.4825	-1.77935	0.0945168	0.499942	-4.66906
P57721	PCBP3	PMA	-0.186215	16.7534	-1.77881	0.0946078	0.499942	-4.66986
Q8NBL1	POGLUT1	PMA	-0.510772	10.5673	-1.77806	0.0947355	0.499942	-4.67098
Q5R372	RABGAP1L	PMA	-0.228454	11.9915	-1.778	0.0947448	0.499942	-4.67106
P09601	HMOX1	PMA	-0.340708	11.6812	-1.77721	0.0948797	0.499942	-4.67224
P22307	SCP2	PMA	0.191006	15.8722	1.77678	0.094953	0.499942	-4.67288
Q96RN5	MED15	PMA	0.344735	11.7305	1.77671	0.0949652	0.499942	-4.67299
Q9HAU8	RNPEPL1	PMA	0.646489	12.2867	1.7759	0.0951025	0.500055	-4.67419
P04920	SLC4A2	PMA	-0.193808	12.7331	-1.7755	0.09517	0.500055	-4.67478
P48681	NES	PMA	-0.512554	14.5223	-1.77463	0.0953195	0.500144	-4.67608
P30679	GNA15	PMA	0.425557	14.038	1.77433	0.0953703	0.500144	-4.67652
Q6STE5	SMARCD3	PMA	-0.487824	11.0504	-1.77332	0.0955422	0.500564	-4.67802
Q96D46	NMD3	PMA	-0.479542	11.0858	-1.77117	0.0959118	0.501321	-4.68122
P51153	RAB13	PMA	-0.218141	14.6175	-1.77078	0.0959784	0.501321	-4.68179
Q8WVR3	TRAPPC14	PMA	-0.286702	11.4833	-1.77036	0.0960508	0.501321	-4.68242
Q9BWS9	CHID1	PMA	0.430429	11.9705	1.77024	0.0960713	0.501321	-4.68259
P00813	ADA	PMA	-0.166025	13.9659	-1.7698	0.0961463	0.501321	-4.68324
Q96S44	TP53RK	PMA	-0.247927	13.1997	-1.76881	0.0963174	0.501734	-4.68472
P0DMV8	HSPA1A	PMA	-0.16094	19.6442	-1.76801	0.0964542	0.501864	-4.68589
Q659A1	ICE2	PMA	-1.01708	14.3416	-1.76742	0.0965558	0.501864	-4.68676
Q14980	NUMA1	PMA	-0.17405	15.7657	-1.76706	0.0966184	0.501864	-4.6873
P42704	LRPPRC	PMA	0.160807	13.1154	1.76651	0.0967132	0.501878	-4.68811
P23921	RRM1	PMA	0.22137	13.8915	1.76358	0.0972207	0.50321	-4.69245
O60488	ACSL4	PMA	-0.149642	13.9457	-1.76265	0.0973835	0.50321	-4.69383
O60603	TLR2	PMA	-0.173495	14.4041	-1.76218	0.0974639	0.50321	-4.69452
O75380	NDUFS6	PMA	0.332295	11.5693	1.76125	0.097626	0.50321	-4.69589
O75385	ULK1	PMA	0.516047	15.9893	1.76123	0.0976291	0.50321	-4.69592
Q9NZ01	TECR	PMA	-0.139097	14.2958	-1.76103	0.0976644	0.50321	-4.69622
O75323	NIPSNAP2	PMA	-0.212737	12.2813	-1.76092	0.0976846	0.50321	-4.69639
Q5JTJ3	COA6	PMA	-0.386846	10.7365	-1.76078	0.097708	0.50321	-4.69659
Q9UBL6	CPNE7	PMA	-0.461978	10.7914	-1.75965	0.0979053	0.503654	-4.69826
P07384	CAPN1	PMA	0.12799	17.1627	1.75904	0.0980119	0.503654	-4.69916
P32314	FOXN2	PMA	-0.804654	14.5922	-1.75776	0.0982364	0.503654	-4.70105
P17480	UBTF	PMA	-0.452227	11.7407	-1.75753	0.0982767	0.503654	-4.70139
Q6PJ69	TRIM65	PMA	0.355551	11.138	1.75716	0.0983413	0.503654	-4.70193
Q8IYB5	SMAP1	PMA	0.528667	11.0902	1.75712	0.0983482	0.503654	-4.70199
P0C0L5	C4B	PMA	0.498842	11.8735	1.75651	0.098455	0.503709	-4.70289
P55061	TMBIM6	PMA	0.227283	13.7986	1.75573	0.0985922	0.503709	-4.70404
P07108	DBI	PMA	-0.193319	16.0786	-1.75548	0.0986361	0.503709	-4.70441
Q15833	STXBP2	PMA	-0.137708	16.4823	-1.75349	0.0989875	0.504352	-4.70735
Q9UBS8	RNF14	PMA	-0.335643	11.4497	-1.75284	0.0991012	0.504352	-4.7083
P12259	F5	PMA	-0.259181	14.7382	-1.75171	0.0993007	0.504352	-4.70996
O60256	PRPSAP2	PMA	0.167672	13.1061	1.75148	0.099341	0.504352	-4.7103
P08236	GUSB	PMA	-0.162983	15.7754	-1.75146	0.0993462	0.504352	-4.71034
P36969	GPX4	PMA	-0.314363	15.1167	-1.7494	0.0997109	0.504352	-4.71337
P30533	LRPAP1	PMA	-0.414422	11.6027	-1.74927	0.0997337	0.504352	-4.71356
P31323	PRKAR2B	PMA	-0.205996	13.5328	-1.74919	0.0997473	0.504352	-4.71367
O43913	ORC5	PMA	0.305498	11.0251	1.74884	0.0998099	0.504352	-4.71419
Q6Y288	B3GLCT	PMA	-0.408063	10.2146	-1.7488	0.0998163	0.504352	-4.71424
Q9BT22	ALG1	PMA	-0.244234	11.8445	-1.74859	0.0998551	0.504352	-4.71456
Q15366	PCBP2	PMA	0.203689	16.3532	1.7483	0.0999052	0.504352	-4.71498
O60711	LPXN	PMA	0.281397	11.1863	1.74797	0.0999641	0.504352	-4.71546
P13639	EEF2	PMA	0.115658	16.9961	1.74695	0.100146	0.504678	-4.71696
Q9HD89	RETN	PMA	-0.47735	14.6377	-1.74625	0.100271	0.504678	-4.718
Q9UL15	BAG5	PMA	-0.305276	11.2119	-1.74582	0.100348	0.504678	-4.71863
Q15029	EFTUD2	PMA	0.142338	15.7195	1.74553	0.100399	0.504678	-4.71905
O94766	B3GAT3	PMA	0.302564	11.1329	1.74412	0.100651	0.50548	-4.72112
P23443	RPS6KB1	PMA	0.44656	10.8182	1.74173	0.10108	0.50629	-4.72463
Q9NUL5	SHFL	PMA	-1.22049	10.8334	-1.741	0.101211	0.50629	-4.7257
Q5HYK3	COQ5	PMA	-0.538105	9.9639	-1.74033	0.101333	0.50629	-4.72669
P16104	H2AX	PMA	0.19982	22.3467	1.74025	0.101346	0.50629	-4.7268
P47974	ZFP36L2	PMA	0.290223	11.8422	1.74009	0.101374	0.50629	-4.72703
Q9UGN4	CD300A	PMA	-0.404693	12.733	-1.73976	0.101434	0.50629	-4.72751
Q96KP1	EXOC2	PMA	-0.189971	15.8914	-1.73886	0.101597	0.50629	-4.72884
Q9Y5S1	TRPV2	PMA	-0.247533	13.0239	-1.73852	0.101658	0.50629	-4.72934
P18887	XRCC1	PMA	0.163075	12.8241	1.73725	0.101888	0.50629	-4.7312
O75976	CPD	PMA	-0.264108	11.9265	-1.73703	0.101928	0.50629	-4.73152
O15530	PDPK1	PMA	-0.234907	12.7084	-1.73656	0.102012	0.50629	-4.7322
P41236	PPP1R2	PMA	0.287372	13.1974	1.73641	0.102039	0.50629	-4.73242
O43189	PHF1	PMA	-0.409142	10.9034	-1.73583	0.102145	0.50629	-4.73327
Q9H7C9	AAMDC	PMA	0.237399	13.8663	1.73524	0.102252	0.50629	-4.73414
Q9NR48	ASH1L	PMA	0.170675	14.7525	1.73505	0.102286	0.50629	-4.73442
P78417	GSTO1	PMA	0.153547	18.9762	1.73438	0.102408	0.50629	-4.73539
Q969S3	ZNF622	PMA	-0.427376	10.235	-1.734	0.102477	0.50629	-4.73595
Q9HAS0	C17orf75	PMA	0.448991	10.9094	1.73397	0.102483	0.50629	-4.736
Q92769	HDAC2	PMA	0.188467	13.4907	1.73318	0.102626	0.506535	-4.73715
Q9BYX2	TBC1D2	PMA	-0.364112	11.8129	-1.73091	0.103041	0.508124	-4.74047
Q86T82	USP37	PMA	-0.541266	10.2342	-1.72925	0.103344	0.508723	-4.7429
Q92945	KHSRP	PMA	-0.157927	15.6533	-1.7282	0.103536	0.508723	-4.74442
P58004	SESN2	PMA	0.384171	11.6324	1.72798	0.103576	0.508723	-4.74474
Q9BVA1	TUBB2B	PMA	0.171217	18.0236	1.72678	0.103798	0.508723	-4.7465
P48735	IDH2	PMA	0.140221	15.8182	1.72661	0.103828	0.508723	-4.74674
Q14847	LASP1	PMA	0.185818	16.5023	1.72642	0.103862	0.508723	-4.74701
Q5T6V5	QNG1	PMA	0.232578	12.7523	1.72596	0.103948	0.508723	-4.74769
O76031	CLPX	PMA	0.411906	14.342	1.72555	0.104023	0.508723	-4.74829
Q9H3U5	MFSD1	PMA	-0.364075	11.6265	-1.72551	0.10403	0.508723	-4.74834
Q15637	SF1	PMA	0.163218	14.4326	1.72516	0.104095	0.508723	-4.74886
Q5TC84	OGFRL1	PMA	-0.268182	13.2512	-1.72425	0.104262	0.509084	-4.75018
Q15678	PTPN14	PMA	0.345565	12.9815	1.72345	0.104411	0.509166	-4.75135
Q99615	DNAJC7	PMA	0.213028	13.2694	1.72315	0.104466	0.509166	-4.75178
Q9H3Z4	DNAJC5	PMA	-0.579228	12.5147	-1.71951	0.105141	0.512	-4.75708
P42680	TEC	PMA	-0.288943	11.7755	-1.71892	0.105251	0.512077	-4.75794
P84095	RHOG	PMA	-0.2055	17.329	-1.71802	0.105419	0.512319	-4.75925
Q9NS69	TOMM22	PMA	0.384692	10.9399	1.71764	0.105489	0.512319	-4.7598
Q9BTT0	ANP32E	PMA	-0.297557	17.1782	-1.71665	0.105674	0.512319	-4.76124
O15111	CHUK	PMA	-0.147209	13.1803	-1.71645	0.105711	0.512319	-4.76153
O75676	RPS6KA4	PMA	-0.324062	12.2068	-1.71613	0.10577	0.512319	-4.76199
O75915	ARL6IP5	PMA	-0.512525	12.1934	-1.71557	0.105875	0.51237	-4.7628
Q13409	DYNC1I2	PMA	0.458281	12.0706	1.71447	0.106081	0.512915	-4.7644
O75844	ZMPSTE24	PMA	-0.199046	14.501	-1.71367	0.106232	0.513189	-4.76557
P16591	FER	PMA	0.238894	13.8191	1.71273	0.106408	0.513585	-4.76693
Q09028	RBBP4	PMA	0.163302	14.6809	1.71092	0.106749	0.514669	-4.76956
Q99653	CHP1	PMA	-0.160228	15.5237	-1.71053	0.106822	0.514669	-4.77012
P61244	MAX	PMA	-0.268119	13.5309	-1.70926	0.107061	0.515369	-4.77196
Q6P4A8	PLBD1	PMA	-0.389359	17.0532	-1.70645	0.107593	0.51744	-4.77602
Q8TDB6	DTX3L	PMA	0.235114	12.6909	1.70599	0.107681	0.51744	-4.7767
Q9HCM1	RESF1	PMA	0.284835	10.5108	1.70503	0.107864	0.517628	-4.77808
Q9H3G5	CPVL	PMA	-0.28167	12.5429	-1.70478	0.10791	0.517628	-4.77844
Q13619	CUL4A	PMA	-0.236715	11.9699	-1.70329	0.108194	0.518035	-4.7806
P25445	FAS	PMA	-0.62921	10.7327	-1.70324	0.108205	0.518035	-4.78067
Q9UPN3	MACF1	PMA	-0.110622	14.1266	-1.70264	0.108318	0.518035	-4.78153
Q2TB90	HKDC1	PMA	0.67774	15.1143	1.70151	0.108534	0.518035	-4.78317
O95486	SEC24A	PMA	0.197782	12.0363	1.70085	0.10866	0.518035	-4.78412
Q8TBX8	PIP4K2C	PMA	-0.166125	13.3616	-1.70066	0.108697	0.518035	-4.7844
Q6PD74	AAGAB	PMA	-0.271661	11.3042	-1.70042	0.108743	0.518035	-4.78475
Q14116	IL18	PMA	0.202465	14.7846	1.70035	0.108755	0.518035	-4.78483
P40937	RFC5	PMA	-0.139856	13.1082	-1.69951	0.108916	0.51819	-4.78605
Q9UL26	RAB22A	PMA	0.455568	13.4022	1.69772	0.10926	0.51819	-4.78863
Q53EP0	FNDC3B	PMA	-0.45387	10.9362	-1.69735	0.109331	0.51819	-4.78916
Q53GQ0	HSD17B12	PMA	0.20315	14.87	1.69714	0.109373	0.51819	-4.78948
Q68CP4	HGSNAT	PMA	-0.304543	13.1137	-1.69658	0.10948	0.51819	-4.79028
Q13423	NNT	PMA	0.124255	15.057	1.69651	0.109492	0.51819	-4.79037
P17676	CEBPB	PMA	-0.308939	12.3838	-1.69641	0.109513	0.51819	-4.79053
Q9C035	TRIM5	PMA	-0.889635	9.57892	-1.69623	0.109548	0.51819	-4.79079
Q9H1E5	TMX4	PMA	0.175482	13.9568	1.69468	0.109846	0.518785	-4.79302
Q8IYD1	GSPT2	PMA	0.174684	13.325	1.69459	0.109864	0.518785	-4.79315
Q99759	MAP3K3	PMA	-0.169052	13.9169	-1.69373	0.110029	0.519056	-4.79438
Q9Y3D9	MRPS23	PMA	0.244574	12.4112	1.69331	0.110112	0.519056	-4.79499
Q9BUJ2	HNRNPUL1	PMA	-0.209801	15.5337	-1.69213	0.11034	0.51926	-4.79669
Q8N108	MIER1	PMA	0.679938	12.6442	1.6921	0.110345	0.51926	-4.79673
P61626	LYZ	PMA	-0.262818	21.1415	-1.68994	0.110765	0.520058	-4.79983
Q9BYN0	SRXN1	PMA	0.263205	12.0004	1.6899	0.110773	0.520058	-4.7999
P28065	PSMB9	PMA	0.129364	15.7966	1.68957	0.110836	0.520058	-4.80036
P23142	FBLN1	PMA	0.274018	12.3391	1.68886	0.110974	0.520058	-4.80138
Q9BXP2	SLC12A9	PMA	0.163966	12.711	1.68878	0.110991	0.520058	-4.80151
Q9Y3A3	MOB4	PMA	0.367707	11.5084	1.68781	0.11118	0.520391	-4.8029
O15127	SCAMP2	PMA	-0.471703	13.4205	-1.68743	0.111253	0.520391	-4.80344
Q9Y2S7	POLDIP2	PMA	0.3084	11.429	1.68656	0.111424	0.520533	-4.80469
P15144	ANPEP	PMA	-0.240709	16.7757	-1.68613	0.111508	0.520533	-4.80531
Q9HAN9	NMNAT1	PMA	-0.225734	15.894	-1.68547	0.111637	0.520533	-4.80625
O95544	NADK	PMA	0.275193	15.2498	1.68533	0.111666	0.520533	-4.80646
Q9UMS4	PRPF19	PMA	-0.173685	14.207	-1.68465	0.111798	0.520707	-4.80743
O75923	DYSF	PMA	-0.161662	15.7512	-1.68309	0.112104	0.521183	-4.80967
Q8NHP8	PLBD2	PMA	-0.336409	12.1613	-1.68226	0.112267	0.521183	-4.81086
P51617	IRAK1	PMA	-0.423534	10.7475	-1.68221	0.112278	0.521183	-4.81093
Q99877	H2BC15	PMA	-0.580379	16.8905	-1.68218	0.112283	0.521183	-4.81097
P59768	GNG2	PMA	-0.291754	15.1428	-1.6817	0.112378	0.521183	-4.81166
Q14766	LTBP1	PMA	-0.377381	11.0854	-1.67877	0.112956	0.523364	-4.81586
Q9C005	DPY30	PMA	-0.169159	14.2652	-1.67834	0.11304	0.523364	-4.81647
Q8WUD1	RAB2B	PMA	-0.256098	15.5958	-1.67678	0.113351	0.524356	-4.81871
Q9Y237	PIN4	PMA	0.202985	13.8422	1.67515	0.113675	0.524976	-4.82104
Q9NUQ7	UFSP2	PMA	-0.239745	14.8736	-1.67514	0.113677	0.524976	-4.82105
P17812	CTPS1	PMA	0.156621	13.9868	1.67343	0.114018	0.525864	-4.82349
Q96C11	FGGY	PMA	-0.297106	11.8101	-1.67178	0.114346	0.525864	-4.82584
Q9H019	MTFR1L	PMA	-0.413183	11.0555	-1.67169	0.114364	0.525864	-4.82597
O94782	USP1	PMA	-0.266208	15.6159	-1.67122	0.114459	0.525864	-4.82665
O43914	TYROBP	PMA	-0.630645	10.3065	-1.67108	0.114486	0.525864	-4.82684
Q5BKZ1	ZNF326	PMA	-0.279439	10.5016	-1.67077	0.11455	0.525864	-4.82729
Q96SW2	CRBN	PMA	0.355382	12.0126	1.66985	0.114733	0.525864	-4.8286
P08559	PDHA1	PMA	0.115933	14.9997	1.6695	0.114803	0.525864	-4.8291
Q96QC0	PPP1R10	PMA	0.179342	11.9793	1.66937	0.114828	0.525864	-4.82927
O14523	C2CD2L	PMA	0.267136	11.7681	1.66935	0.114834	0.525864	-4.82932
Q9NR28	DIABLO	PMA	-0.142195	13.0323	-1.66505	0.115699	0.529266	-4.83543
O14773	TPP1	PMA	-0.194885	16.6315	-1.66465	0.115779	0.529266	-4.836
Q5XPI4	RNF123	PMA	0.17836	12.5239	1.66291	0.116133	0.529266	-4.83848
Q12846	STX4	PMA	-0.261174	13.7998	-1.6622	0.116275	0.529266	-4.83948
Q9BQ39	DDX50	PMA	0.21087	12.1154	1.66201	0.116314	0.529266	-4.83976
P20849	COL9A1	PMA	-0.48734	16.8015	-1.662	0.116316	0.529266	-4.83977
P07203	GPX1	PMA	0.14125	15.906	1.66199	0.116319	0.529266	-4.83979
Q7Z5G4	GOLGA7	PMA	-0.295999	14.3646	-1.66182	0.116353	0.529266	-4.84003
Q4G148	GXYLT1	PMA	0.473924	9.88255	1.66041	0.116638	0.5296	-4.84202
P09668	CTSH	PMA	-0.214575	12.7259	-1.66027	0.116667	0.5296	-4.84223
Q8WTR2	DUSP19	PMA	-0.435523	16.1094	-1.65942	0.116841	0.5296	-4.84344
Q9NZC3	GDE1	PMA	-0.206874	12.6335	-1.65903	0.116921	0.5296	-4.84399
Q70E73	RAPH1	PMA	0.274664	13.0763	1.65879	0.11697	0.5296	-4.84434
Q8WUA7	TBC1D22A	PMA	-0.157638	13.1362	-1.65818	0.117093	0.5296	-4.84519
P36222	CHI3L1	PMA	-0.146931	16.6482	-1.65812	0.117106	0.5296	-4.84528
Q9UFC0	LRWD1	PMA	0.239641	14.6368	1.6574	0.117254	0.529827	-4.84631
Q13432	UNC119	PMA	-0.236515	11.8684	-1.65689	0.117356	0.529852	-4.84702
P33121	ACSL1	PMA	-0.179964	16.0378	-1.65579	0.117583	0.530174	-4.84859
O15037	KHNYN	PMA	0.211168	13.6751	1.65539	0.117665	0.530174	-4.84916
P49590	HARS2	PMA	0.202265	12.2575	1.65478	0.117789	0.530174	-4.85002
P37235	HPCAL1	PMA	-0.264843	14.4634	-1.65437	0.117874	0.530174	-4.8506
P68402	PAFAH1B2	PMA	-0.145746	16.6924	-1.65408	0.117934	0.530174	-4.85101
O15021	MAST4	PMA	-0.237746	15.6961	-1.65344	0.118065	0.530174	-4.85192
P50336	PPOX	PMA	0.214655	13.3619	1.65323	0.118108	0.530174	-4.85222
P00749	PLAU	PMA	-0.394045	11.5375	-1.65224	0.118312	0.530652	-4.85362
P33241	LSP1	PMA	-0.364483	17.2719	-1.65052	0.118667	0.531807	-4.85605
Q16875	PFKFB3	PMA	0.265535	13.4882	1.64827	0.119132	0.532351	-4.85923
O60237	PPP1R12B	PMA	-0.313304	13.5879	-1.64784	0.119221	0.532351	-4.85984
P50552	VASP	PMA	-0.19066	17.3608	-1.6471	0.119373	0.532351	-4.86088
Q07960	ARHGAP1	PMA	-0.171881	17.0701	-1.64702	0.11939	0.532351	-4.86099
Q14697	GANAB	PMA	-0.153979	17.3339	-1.64684	0.119428	0.532351	-4.86125
Q86VR8	FJX1	PMA	0.271886	11.794	1.64684	0.119428	0.532351	-4.86125
Q9NV96	TMEM30A	PMA	-0.324591	15.3387	-1.64634	0.119531	0.532351	-4.86195
Q96GM8	TOE1	PMA	0.232259	10.6524	1.64576	0.119653	0.532351	-4.86278
Q9H299	SH3BGRL3	PMA	-0.249457	17.3434	-1.64569	0.119667	0.532351	-4.86287
Q9UJY5	GGA1	PMA	-0.139039	13.4342	-1.64488	0.119835	0.532663	-4.86401
Q9NWS0	PIH1D1	PMA	-0.561286	9.80414	-1.64361	0.1201	0.533084	-4.86581
P04839	CYBB	PMA	0.165577	19.4296	1.64349	0.120125	0.533084	-4.86598
O00507	USP9Y	PMA	0.112361	14.7933	1.64233	0.120367	0.533726	-4.86761
Q6UWD8	C16orf54	PMA	-0.310455	11.6932	-1.64035	0.120782	0.535132	-4.87041
Q9P2X3	IMPACT	PMA	-0.331245	11.6154	-1.63842	0.121187	0.536174	-4.87312
L0R6Q1		PMA	0.267206	13.3253	1.63783	0.121311	0.536174	-4.87396
Q8NEZ2	VPS37A	PMA	-0.207255	12.3705	-1.63782	0.121313	0.536174	-4.87396
Q96SI9	STRBP	PMA	0.192736	14.651	1.63642	0.121608	0.537043	-4.87593
Q969P6	TOP1MT	PMA	0.688508	14.6707	1.6355	0.121803	0.537216	-4.87723
Q8IVG5	SAMD9L	PMA	0.227756	12.3556	1.6353	0.121844	0.537216	-4.87751
P19784	CSNK2A2	PMA	0.229053	13.2198	1.63336	0.122255	0.538591	-4.88024
P50226	SULT1A2	PMA	0.204075	14.5573	1.631	0.122755	0.53967	-4.88355
Q969G6	RFK	PMA	-0.597224	10.975	-1.63029	0.122906	0.53967	-4.88454
Q9NUX5	POT1	PMA	0.370398	10.5602	1.62984	0.123003	0.53967	-4.88518
Q5VWQ0	RSBN1	PMA	-0.254798	11.6252	-1.62895	0.123192	0.53967	-4.88642
Q13907	IDI1	PMA	0.302547	10.7168	1.62842	0.123305	0.53967	-4.88717
Q9BQ87	TBL1Y	PMA	-0.550552	11.7177	-1.62841	0.123308	0.53967	-4.88719
Q7L8J4	SH3BP5L	PMA	-0.336926	11.4943	-1.62804	0.123386	0.53967	-4.8877
Q96JH8	RADIL	PMA	-0.996739	15.7832	-1.62779	0.123438	0.53967	-4.88804
Q01082	SPTBN1	PMA	-0.196789	15.7484	-1.62729	0.123546	0.53967	-4.88875
Q9H7E2	TDRD3	PMA	0.439466	9.83633	1.6268	0.12365	0.53967	-4.88943
Q9Y5W9	SNX11	PMA	0.211322	12.4692	1.62677	0.123656	0.53967	-4.88947
Q96A26	FAM162A	PMA	-0.401306	12.3151	-1.62589	0.123844	0.53967	-4.8907
Q9Y6M4	CSNK1G3	PMA	-0.185147	12.6317	-1.62578	0.123869	0.53967	-4.89086
Q13610	PWP1	PMA	0.432125	9.73988	1.62456	0.124131	0.53967	-4.89257
Q9NSC5	HOMER3	PMA	-0.290618	14.1285	-1.62427	0.124193	0.53967	-4.89298
Q9Y2L1	DIS3	PMA	0.121252	12.7201	1.62425	0.124196	0.53967	-4.893
Q96B97	SH3KBP1	PMA	0.194012	16.3764	1.62413	0.124222	0.53967	-4.89317
P46976	GYG1	PMA	0.143469	18.2783	1.62386	0.12428	0.53967	-4.89355
Q8NC96	NECAP1	PMA	0.15781	13.8531	1.62266	0.124538	0.540359	-4.89522
Q9Y618	NCOR2	PMA	0.574912	12.8347	1.62215	0.124648	0.540385	-4.89594
O60884	DNAJA2	PMA	-0.136648	13.6733	-1.62171	0.124742	0.540385	-4.89655
Q9H9G7	AGO3	PMA	-0.164932	12.7547	-1.62027	0.125053	0.541077	-4.89856
Q7Z2H8	SLC36A1	PMA	0.204361	13.0146	1.61949	0.125222	0.541077	-4.89965
P12109	COL6A1	PMA	0.270982	11.6113	1.61913	0.125301	0.541077	-4.90016
Q15041	ARL6IP1	PMA	-0.525011	11.7886	-1.61899	0.12533	0.541077	-4.90035
Q9Y6D9	MAD1L1	PMA	-0.179811	12.8757	-1.61796	0.125553	0.541077	-4.90179
P57737	CORO7	PMA	0.152988	15.9622	1.61776	0.125596	0.541077	-4.90206
Q13636	RAB31	PMA	-0.218055	17.358	-1.61769	0.125613	0.541077	-4.90217
A4D1S5	RAB19	PMA	-0.326368	13.4668	-1.6173	0.125696	0.541077	-4.90271
Q53HV7	SMUG1	PMA	-0.489032	9.72212	-1.61685	0.125795	0.541077	-4.90334
Q8N4Q0	PTGR3	PMA	-0.213481	12.02	-1.61533	0.126125	0.542067	-4.90546
O95747	OXSR1	PMA	0.132068	16.489	1.61481	0.126237	0.542121	-4.90618
Q9UPA5	BSN	PMA	0.201615	13.7689	1.61432	0.126343	0.542153	-4.90686
O14662	STX16	PMA	0.42439	9.98145	1.61271	0.126695	0.54267	-4.9091
Q8IY67	RAVER1	PMA	0.1965	13.1534	1.61256	0.126729	0.54267	-4.90932
Q9BXS5	AP1M1	PMA	-0.167163	16.1997	-1.61209	0.126831	0.54267	-4.90997
Q6BCY4	CYB5R2	PMA	-0.511719	12.1731	-1.61085	0.127101	0.54267	-4.91169
P45954	ACADSB	PMA	-0.208452	12.6049	-1.61018	0.127249	0.54267	-4.91263
Q9HBG6	IFT122	PMA	-0.547486	13.7036	-1.61001	0.127285	0.54267	-4.91286
Q9H853		PMA	-0.202135	17.6776	-1.60999	0.12729	0.54267	-4.91289
Q8NF91	SYNE1	PMA	-0.13815	15.2173	-1.60996	0.127297	0.54267	-4.91293
Q96DE0	NUDT16	PMA	0.154812	13.555	1.60907	0.127493	0.54267	-4.91417
Q4KMP7	TBC1D10B	PMA	0.160248	13.1016	1.6089	0.12753	0.54267	-4.91441
Q9ULZ3	PYCARD	PMA	-0.215092	18.602	-1.60877	0.127558	0.54267	-4.91459
O95139	NDUFB6	PMA	-0.493259	10.0483	-1.6063	0.128101	0.54325	-4.91801
O75882	ATRN	PMA	-0.39111	10.6415	-1.6054	0.1283	0.54325	-4.91926
Q9H0A0	NAT10	PMA	0.264945	11.2465	1.60481	0.128431	0.54325	-4.92009
Q8WUH2	TGFBRAP1	PMA	0.169509	13.3668	1.60463	0.128471	0.54325	-4.92034
O95400	CD2BP2	PMA	-0.229266	12.4315	-1.60459	0.12848	0.54325	-4.92039
Q12789	GTF3C1	PMA	-0.147961	17.0267	-1.60306	0.128818	0.54325	-4.92251
P20702	ITGAX	PMA	-0.212474	14.1463	-1.60305	0.12882	0.54325	-4.92253
Q6ZUJ8	PIK3AP1	PMA	-0.186269	12.8919	-1.60277	0.128882	0.54325	-4.92291
Q96B45	BORCS7	PMA	0.267224	11.5104	1.60273	0.12889	0.54325	-4.92296
Q99728	BARD1	PMA	0.511551	17.3338	1.60254	0.128933	0.54325	-4.92323
Q96P16	RPRD1A	PMA	-0.498115	11.399	-1.60246	0.128949	0.54325	-4.92333
Q9Y2Q0	ATP8A1	PMA	-0.140425	15.0752	-1.60243	0.128957	0.54325	-4.92338
P35232	PHB1	PMA	0.16908	16.4156	1.60203	0.129045	0.54325	-4.92393
Q9Y2X3	NOP58	PMA	0.144521	13.8955	1.60035	0.129419	0.54325	-4.92627
Q96QT4	TRPM7	PMA	-0.339388	14.2112	-1.60014	0.129465	0.54325	-4.92655
Q96KR6	FAM210B	PMA	0.425922	10.4332	1.59976	0.129549	0.54325	-4.92707
Q9Y2R2	PTPN22	PMA	0.431984	10.9534	1.59976	0.12955	0.54325	-4.92708
Q14444	CAPRIN1	PMA	0.203839	12.967	1.5997	0.129564	0.54325	-4.92716
Q6PIU2	NCEH1	PMA	0.196605	12.3129	1.59959	0.129587	0.54325	-4.92731
Q96SK2	TMEM209	PMA	-0.397764	11.939	-1.59813	0.129913	0.543307	-4.92933
Q6ZRQ5	MMS22L	PMA	-0.486918	14.8374	-1.59787	0.129972	0.543307	-4.9297
Q9UHY7	ENOPH1	PMA	-0.201706	14.9921	-1.59724	0.130111	0.543307	-4.93056
Q70IA6	MOB2	PMA	-0.26359	11.8111	-1.597	0.130166	0.543307	-4.9309
P42126	ECI1	PMA	0.152921	14.1951	1.59675	0.130222	0.543307	-4.93125
Q86WX3	RPS19BP1	PMA	-0.368649	12.7611	-1.59635	0.130311	0.543307	-4.93179
Q9NRK6	ABCB10	PMA	0.258364	14.4349	1.59598	0.130393	0.543307	-4.93231
Q9Y2G9	SBNO2	PMA	-0.509876	11.6797	-1.59596	0.130398	0.543307	-4.93233
Q9Y6G9	DYNC1LI1	PMA	-0.191776	13.6481	-1.59509	0.130593	0.543448	-4.93354
Q9H008	LHPP	PMA	0.260685	14.1816	1.59492	0.130631	0.543448	-4.93377
Q96RE7	NACC1	PMA	0.288934	13.3855	1.59445	0.130737	0.543475	-4.93442
Q3ZAQ7	VMA21	PMA	-0.322282	14.734	-1.5936	0.130927	0.543769	-4.93559
Q08499	PDE4D	PMA	-0.224316	11.2438	-1.59324	0.131007	0.543769	-4.93609
Q96FK6	WDR89	PMA	0.366803	10.3915	1.59136	0.131432	0.544571	-4.93869
Q6GMV2	SMYD5	PMA	0.386373	11.2919	1.59133	0.131438	0.544571	-4.93873
Q9Y3A6	TMED5	PMA	0.219115	12.2552	1.59105	0.1315	0.544571	-4.93911
Q9GZT8	NIF3L1	PMA	0.181435	13.523	1.59003	0.131731	0.545114	-4.94052
O43516	WIPF1	PMA	-0.109854	17.0195	-1.58951	0.131848	0.545187	-4.94124
P68400	CSNK2A1	PMA	-0.240509	13.8173	-1.58829	0.132124	0.545914	-4.94292
O15498	YKT6	PMA	0.197146	13.0581	1.58731	0.132345	0.546333	-4.94426
Q68E01	INTS3	PMA	-0.147182	13.1671	-1.58694	0.132431	0.546333	-4.94478
O60841	EIF5B	PMA	-0.158017	12.8035	-1.58623	0.132591	0.546333	-4.94575
Q969F9	HPS3	PMA	0.228919	13.0302	1.58607	0.132626	0.546333	-4.94596
P53611	RABGGTB	PMA	-0.311952	10.8902	-1.58521	0.132822	0.546725	-4.94715
P04156	PRNP	PMA	-0.521197	10.9722	-1.5843	0.13303	0.54717	-4.94841
Q13347	EIF3I	PMA	0.154778	14.3677	1.58341	0.133232	0.547279	-4.94962
O95644	NFATC1	PMA	0.252489	11.1963	1.5833	0.133258	0.547279	-4.94978
O75955	FLOT1	PMA	0.127867	16.2652	1.58243	0.133455	0.547679	-4.95097
Q9BVC4	MLST8	PMA	-0.511146	10.4459	-1.58175	0.13361	0.547687	-4.9519
Q15291	RBBP5	PMA	0.244355	11.4794	1.58144	0.133681	0.547687	-4.95233
P51452	DUSP3	PMA	0.204347	13.6637	1.58111	0.133758	0.547687	-4.95279
Q9H7D0	DOCK5	PMA	-0.124168	15.4559	-1.58063	0.133867	0.547721	-4.95345
Q9P0J1	PDP1	PMA	0.211929	12.136	1.57984	0.134048	0.548048	-4.95453
P46108	CRK	PMA	0.21476	13.0564	1.57863	0.134325	0.54876	-4.95618
P78406	RAE1	PMA	-0.119148	13.458	-1.57743	0.134602	0.54876	-4.95784
P32019	INPP5B	PMA	-0.210935	11.8761	-1.57641	0.134837	0.54876	-4.95924
Q02224	CENPE	PMA	0.241067	14.832	1.57618	0.134889	0.54876	-4.95955
Q9BQG0	MYBBP1A	PMA	0.236495	11.0705	1.57595	0.134943	0.54876	-4.95987
Q9UHX1	PUF60	PMA	-0.120948	14.1374	-1.57578	0.134982	0.54876	-4.9601
O60524	NEMF	PMA	0.216174	12.8031	1.57558	0.135027	0.54876	-4.96037
Q9NUY8	TBC1D23	PMA	-0.179198	12.7029	-1.57512	0.135133	0.54876	-4.961
Q03938	ZNF90	PMA	0.255102	16.2349	1.57493	0.135177	0.54876	-4.96126
P54709	ATP1B3	PMA	-0.18257	13.6561	-1.57471	0.135228	0.54876	-4.96156
P49750	YLPM1	PMA	-0.177455	12.6764	-1.57159	0.135949	0.55106	-4.96582
Q7Z5K2	WAPL	PMA	-0.172765	11.9984	-1.57139	0.135997	0.55106	-4.9661
P61077	UBE2D3	PMA	-0.558551	17.4	-1.57054	0.136193	0.55106	-4.96726
P35579	MYH9	PMA	-0.175506	19.7648	-1.57051	0.136199	0.55106	-4.96729
P51648	ALDH3A2	PMA	-0.313688	14.5943	-1.56945	0.136447	0.551308	-4.96875
O94979	SEC31A	PMA	-0.155644	14.1143	-1.5692	0.136504	0.551308	-4.96909
P27824	CANX	PMA	-0.247281	18.6124	-1.56895	0.136563	0.551308	-4.96943
Q6VY07	PACS1	PMA	0.172471	13.8649	1.56796	0.136794	0.551831	-4.97079
Q9H6U8	ALG9	PMA	0.414499	11.7323	1.5673	0.136948	0.552003	-4.97168
Q8N4V1	MMGT1	PMA	0.203822	11.6043	1.56691	0.137039	0.552003	-4.97222
Q08752	PPID	PMA	0.178883	13.6919	1.56638	0.137162	0.55202	-4.97293
O95487	SEC24B	PMA	0.141511	12.6649	1.56602	0.137246	0.55202	-4.97343
P49137	MAPKAPK2	PMA	-0.178525	13.8543	-1.56353	0.13783	0.553959	-4.97682
Q9NRA8	EIF4ENIF1	PMA	0.387999	11.1703	1.56258	0.138052	0.55426	-4.97811
Q9H2G2	SLK	PMA	-0.135022	16.1202	-1.56192	0.138207	0.55426	-4.97901
O15156	ZBTB7B	PMA	-0.412407	10.9466	-1.56074	0.138486	0.55426	-4.98062
Q9NX40	OCIAD1	PMA	0.189133	12.2431	1.56045	0.138554	0.55426	-4.98102
Q99459	CDC5L	PMA	-0.149631	14.1471	-1.5592	0.138847	0.55426	-4.98271
O00560	SDCBP	PMA	0.187415	15.5474	1.55905	0.138884	0.55426	-4.98292
P43034	PAFAH1B1	PMA	-0.139099	15.1744	-1.55898	0.1389	0.55426	-4.98301
Q9BTC0	DIDO1	PMA	-0.178276	12.0942	-1.55885	0.13893	0.55426	-4.98318
Q9Y383	LUC7L2	PMA	-0.126428	14.7152	-1.55851	0.139011	0.55426	-4.98365
Q9UK59	DBR1	PMA	-0.152127	12.8691	-1.55848	0.139018	0.55426	-4.98369
O43808	SLC25A17	PMA	-0.496371	11.2071	-1.55777	0.139186	0.55426	-4.98465
Q9NS28	RGS18	PMA	-0.502478	11.0787	-1.55769	0.139205	0.55426	-4.98476
Q13761	RUNX3	PMA	0.245794	12.1433	1.5576	0.139226	0.55426	-4.98488
Q9NQ11	ATP13A2	PMA	0.30852	11.1622	1.55616	0.139567	0.554603	-4.98684
Q9BVL2	NUP58	PMA	-0.184892	13.2268	-1.55546	0.139733	0.554603	-4.98779
P22033	MMUT	PMA	0.239235	12.6346	1.5553	0.139772	0.554603	-4.98801
Q9BT23	LIMD2	PMA	0.214106	13.9829	1.55491	0.139864	0.554603	-4.98854
Q7L7V1	DHX32	PMA	0.53052	12.8321	1.55469	0.139915	0.554603	-4.98883
Q96S97	MYADM	PMA	-0.313445	18.826	-1.55466	0.139922	0.554603	-4.98887
P30273	FCER1G	PMA	0.418858	16.7256	1.55379	0.140131	0.555027	-4.99006
Q15036	SNX17	PMA	-0.195816	13.2238	-1.55299	0.140319	0.555371	-4.99113
Q9Y224	RTRAF	PMA	-0.184356	13.9343	-1.55095	0.140807	0.556526	-4.9939
A8MVW0	FAM171A2	PMA	0.271532	14.5119	1.55066	0.140877	0.556526	-4.9943
P13612	ITGA4	PMA	0.294506	12.8159	1.55049	0.140917	0.556526	-4.99453
Q8N5M9	JAGN1	PMA	-0.503436	12.1413	-1.54889	0.141299	0.556622	-4.99668
Q8TDJ6	DMXL2	PMA	0.19734	11.5157	1.54886	0.141307	0.556622	-4.99673
P63027	VAMP2	PMA	-0.559845	14.8564	-1.54882	0.141317	0.556622	-4.99679
Q14677	CLINT1	PMA	0.238352	13.2224	1.54868	0.14135	0.556622	-4.99697
O43426	SYNJ1	PMA	-0.127266	13.4631	-1.54803	0.141506	0.556835	-4.99785
Q8TF09	DYNLRB2	PMA	-0.258877	12.9705	-1.54699	0.141755	0.557203	-4.99925
Q86TM6	SYVN1	PMA	0.266217	11.783	1.54657	0.141857	0.557203	-4.99983
Q9HBH5	RDH14	PMA	0.276061	12.0389	1.54636	0.141906	0.557203	-5.00011
P33316	DUT	PMA	0.153993	13.1547	1.54458	0.142336	0.55816	-5.00251
Q8ND76	CCNY	PMA	-0.237717	12.8524	-1.5445	0.142354	0.55816	-5.00262
O43187	IRAK2	PMA	-0.416477	12.0347	-1.54339	0.142623	0.55881	-5.00412
P17050	NAGA	PMA	-0.179655	13.8522	-1.53931	0.143609	0.562271	-5.00961
Q9Y5P6	GMPPB	PMA	0.16155	15.107	1.53787	0.143959	0.562365	-5.01155
Q52LJ0	FAM98B	PMA	-0.233352	13.6297	-1.53765	0.144014	0.562365	-5.01185
Q96FW1	OTUB1	PMA	-0.171215	16.2547	-1.53701	0.144169	0.562365	-5.01271
P52907	CAPZA1	PMA	-0.221888	18.3899	-1.5367	0.144245	0.562365	-5.01313
Q9NQC7	CYLD	PMA	0.160478	12.5451	1.53653	0.144287	0.562365	-5.01336
Q9GZQ3	COMMD5	PMA	-0.222452	14.008	-1.53627	0.14435	0.562365	-5.01371
Q9Y3X0	CCDC9	PMA	-0.287368	12.5997	-1.53598	0.144419	0.562365	-5.01409
P0C7P4		PMA	0.167448	15.7217	1.53583	0.144458	0.562365	-5.0143
Q9NVI7	ATAD3A	PMA	0.22187	12.2738	1.53499	0.144662	0.562468	-5.01543
O94910	ADGRL1	PMA	-0.535558	11.7212	-1.53487	0.144691	0.562468	-5.01558
Q9C0H2	TTYH3	PMA	0.362713	11.0967	1.53423	0.144849	0.562575	-5.01645
Q9Y6W3	CAPN7	PMA	0.158556	13.4704	1.53392	0.144924	0.562575	-5.01687
P02753	RBP4	PMA	0.284593	13.8295	1.53224	0.145336	0.56377	-5.01912
Q8IZE3	SCYL3	PMA	0.408805	10.4449	1.53084	0.14568	0.56465	-5.021
P32942	ICAM3	PMA	-0.247747	17.8017	-1.52977	0.145941	0.56465	-5.02243
P06576	ATP5F1B	PMA	0.118382	17.9039	1.52972	0.145954	0.56465	-5.02249
P39656	DDOST	PMA	0.182278	16.4962	1.52963	0.145977	0.56465	-5.02262
O00399	DCTN6	PMA	-0.259645	11.2405	-1.52767	0.14646	0.56612	-5.02525
Q9NPA8	ENY2	PMA	0.321402	12.324	1.52516	0.14708	0.567833	-5.0286
Q9BZ67	FRMD8	PMA	0.28336	11.647	1.52494	0.147134	0.567833	-5.02889
Q9H8S9	MOB1A	PMA	-0.31869	15.7115	-1.52461	0.147216	0.567833	-5.02934
Q9P035	HACD3	PMA	-0.476429	12.9799	-1.52338	0.147522	0.568581	-5.03098
Q9BXP5	SRRT	PMA	0.144318	14.096	1.52299	0.147618	0.568581	-5.0315
A2A3N6		PMA	0.498469	13.2911	1.52225	0.147803	0.568891	-5.03249
P12270	TPR	PMA	-0.171671	13.8766	-1.51989	0.148392	0.570754	-5.03565
A8K855	EFCAB7	PMA	-0.451793	10.6154	-1.51791	0.148886	0.571105	-5.03829
Q9H2W6	MRPL46	PMA	-0.274814	11.2399	-1.51755	0.148976	0.571105	-5.03876
P13164	IFITM1	PMA	-0.836006	14.5185	-1.51674	0.149179	0.571105	-5.03984
P38117	ETFB	PMA	0.110486	14.9677	1.51658	0.149218	0.571105	-5.04005
Q8NHP6	MOSPD2	PMA	-0.153883	15.7502	-1.51577	0.149421	0.571105	-5.04113
Q8N6S5	ARL6IP6	PMA	-0.41874	12.2267	-1.51536	0.149525	0.571105	-5.04168
O00115	DNASE2	PMA	0.237826	12.2643	1.51509	0.149594	0.571105	-5.04204
O00584	RNASET2	PMA	-0.139595	15.8016	-1.51507	0.149598	0.571105	-5.04207
Q96AX2	RAB37	PMA	-0.207281	13.1942	-1.51423	0.149808	0.571105	-5.04318
Q9UKT9	IKZF3	PMA	-0.355785	12.5386	-1.51395	0.149879	0.571105	-5.04355
Q6UW68	TMEM205	PMA	-0.175011	14.1198	-1.51338	0.150022	0.571105	-5.04431
P61601	NCALD	PMA	-0.199907	13.9905	-1.51258	0.150226	0.571105	-5.04538
P63098	PPP3R1	PMA	-0.443601	12.1344	-1.51241	0.150269	0.571105	-5.04561
Q9NRL2	BAZ1A	PMA	-0.18956	13.772	-1.512	0.150371	0.571105	-5.04615
Q8WUM0	NUP133	PMA	-0.162963	13.2844	-1.51182	0.150417	0.571105	-5.04639
P09874	PARP1	PMA	0.247449	14.083	1.51174	0.150436	0.571105	-5.04649
Q13772	NCOA4	PMA	-0.238377	11.0307	-1.51088	0.150654	0.571105	-5.04764
Q9Y6Y8	SEC23IP	PMA	-0.19431	12.7581	-1.51059	0.150729	0.571105	-5.04803
Q8IUX4	APOBEC3F	PMA	0.299668	10.0164	1.51011	0.15085	0.571105	-5.04866
Q6P587	FAHD1	PMA	0.374201	11.798	1.5096	0.150978	0.571105	-5.04934
Q6ZTN6	ANKRD13D	PMA	0.171268	13.5231	1.50938	0.151035	0.571105	-5.04964
Q7Z3B4	NUP54	PMA	-0.149763	12.9531	-1.50902	0.151126	0.571105	-5.05011
Q15067	ACOX1	PMA	0.183961	14.3069	1.50868	0.151212	0.571105	-5.05056
Q15572	TAF1C	PMA	-0.464202	13.4635	-1.50835	0.151295	0.571105	-5.051
P62701	RPS4X	PMA	0.151923	16.6026	1.50792	0.151404	0.571105	-5.05157
O95613	PCNT	PMA	-0.279896	11.8878	-1.50737	0.151543	0.571105	-5.05229
O95989	NUDT3	PMA	-0.173412	13.8438	-1.5067	0.151714	0.571105	-5.05318
P06748	NPM1	PMA	0.317052	14.2597	1.50663	0.151732	0.571105	-5.05328
P34932	HSPA4	PMA	-0.174295	15.0547	-1.50641	0.151787	0.571105	-5.05357
Q9UPZ3	HPS5	PMA	0.303475	11.8733	1.50611	0.151864	0.571105	-5.05396
Q9UPT8	ZC3H4	PMA	-0.165885	11.6838	-1.50603	0.151885	0.571105	-5.05407
Q7L523	RRAGA	PMA	-0.247682	14.6042	-1.50582	0.151937	0.571105	-5.05435
Q6PDB4	ZNF880	PMA	0.232724	13.2566	1.50582	0.151939	0.571105	-5.05435
P30101	PDIA3	PMA	0.174097	18.1022	1.50482	0.152192	0.571394	-5.05567
P11274	BCR	PMA	0.129893	14.4038	1.50469	0.152225	0.571394	-5.05584
Q86XE0	SNX32	PMA	-0.501457	9.62094	-1.5034	0.152554	0.572236	-5.05755
P48059	LIMS1	PMA	-0.15484	14.9678	-1.50252	0.15278	0.572689	-5.05872
P07237	P4HB	PMA	-0.206884	18.5168	-1.5016	0.153017	0.573182	-5.05994
P26378	ELAVL4	PMA	0.517092	13.7307	1.50078	0.153227	0.57343	-5.06103
Q15070	OXA1L	PMA	0.19604	12.5705	1.50001	0.153423	0.57343	-5.06204
Q9NRW4	DUSP22	PMA	0.491723	10.2115	1.49998	0.153431	0.57343	-5.06208
Q9NYF8	BCLAF1	PMA	0.199614	13.3912	1.49964	0.153519	0.57343	-5.06253
Q9BYI3	HYCC1	PMA	-0.360943	11.0603	-1.4992	0.15363	0.57343	-5.06311
Q06481	APLP2	PMA	-0.255368	11.1999	-1.49851	0.153807	0.57343	-5.06401
O75691	UTP20	PMA	-0.380961	12.2211	-1.49812	0.153908	0.57343	-5.06453
Q8IZQ5	SELENOH	PMA	0.328385	13.3463	1.49794	0.153955	0.57343	-5.06477
Q9NXH8	TOR4A	PMA	-0.213842	13.3904	-1.49765	0.154029	0.57343	-5.06515
Q9NRF8	CTPS2	PMA	0.129078	13.9148	1.49673	0.154267	0.573924	-5.06637
P61026	RAB10	PMA	-0.147413	16.7341	-1.49586	0.154492	0.574008	-5.06752
Q6ZQN7	SLCO4C1	PMA	-0.399783	12.2801	-1.49573	0.154526	0.574008	-5.06769
Q2KHT3	CLEC16A	PMA	0.123243	15.6326	1.49504	0.154703	0.574008	-5.0686
P04350	TUBB4A	PMA	0.162676	16.2547	1.49488	0.154743	0.574008	-5.0688
Q9UPY8	MAPRE3	PMA	0.168653	11.4426	1.4944	0.15487	0.574008	-5.06945
P50749	RASSF2	PMA	-0.176287	16.282	-1.49409	0.15495	0.574008	-5.06985
Q5JTH9	RRP12	PMA	0.397407	11.0246	1.49225	0.155426	0.574008	-5.07227
P42331	ARHGAP25	PMA	-0.163282	15.4893	-1.49215	0.155453	0.574008	-5.07241
P35475	IDUA	PMA	0.304265	11.0599	1.49209	0.155467	0.574008	-5.07248
Q8N5I2	ARRDC1	PMA	-0.169134	12.9699	-1.49166	0.155579	0.574008	-5.07305
P00492	HPRT1	PMA	-0.126873	16.3156	-1.49117	0.155706	0.574008	-5.07369
Q9Y4H4	GPSM3	PMA	-0.195932	16.0044	-1.49057	0.155862	0.574008	-5.07448
Q9Y3I1	FBXO7	PMA	0.230983	12.3221	1.48962	0.156109	0.574008	-5.07573
Q5T5Y3	CAMSAP1	PMA	0.359809	10.4519	1.48889	0.1563	0.574008	-5.07669
Q9UJZ1	STOML2	PMA	-0.19429	13.1539	-1.48853	0.156393	0.574008	-5.07716
Q8WZ82	OVCA2	PMA	0.253104	11.6021	1.48849	0.156404	0.574008	-5.07722
Q96G03	PGM2	PMA	-0.15832	16.1842	-1.48831	0.156452	0.574008	-5.07746
P11908	PRPS2	PMA	0.139867	13.8098	1.48791	0.156555	0.574008	-5.07798
Q92620	DHX38	PMA	0.178554	12.1911	1.48735	0.156702	0.574008	-5.07872
P36404	ARL2	PMA	0.139176	13.047	1.48689	0.156822	0.574008	-5.07932
Q7KZI7	MARK2	PMA	-0.199777	14.7199	-1.48671	0.156868	0.574008	-5.07955
Q16644	MAPKAPK3	PMA	-0.178313	14.5545	-1.48638	0.156956	0.574008	-5.07999
P49773	HINT1	PMA	-0.1786	16.0979	-1.48609	0.157031	0.574008	-5.08037
Q13510	ASAH1	PMA	0.122154	15.9972	1.48604	0.157044	0.574008	-5.08044
Q9NZG7	NINJ2	PMA	-0.384989	10.5906	-1.48547	0.157193	0.574008	-5.08118
Q15814	TBCC	PMA	-0.146434	14.1199	-1.48546	0.157195	0.574008	-5.08119
O60942	RNGTT	PMA	-0.352309	10.2013	-1.48533	0.15723	0.574008	-5.08137
P62888	RPL30	PMA	-0.135172	15.6569	-1.4853	0.157236	0.574008	-5.0814
Q8NFH8	REPS2	PMA	-0.310041	11.7846	-1.48412	0.157546	0.574753	-5.08295
Q6P4E1	GOLM2	PMA	-0.41765	11.6337	-1.48361	0.15768	0.574857	-5.08362
P27105	STOM	PMA	0.139859	18.8299	1.48301	0.157839	0.575054	-5.08441
Q9HB58	SP110	PMA	-0.231213	13.4113	-1.48213	0.158069	0.575505	-5.08555
O60749	SNX2	PMA	-0.136814	14.1839	-1.48032	0.158547	0.576572	-5.08793
Q99417	MYCBP	PMA	-0.222839	13.5781	-1.47952	0.158758	0.576572	-5.08898
P56385	ATP5ME	PMA	-0.155305	13.283	-1.47948	0.158768	0.576572	-5.08903
Q99766	DMAC2L	PMA	0.21928	11.5149	1.47942	0.158784	0.576572	-5.08911
Q9BRX8	PRXL2A	PMA	0.219638	11.0918	1.47805	0.159147	0.577151	-5.0909
Q14160	SCRIB	PMA	0.233136	12.418	1.47741	0.159315	0.577151	-5.09173
Q9H0U6	MRPL18	PMA	-0.256481	10.9448	-1.47591	0.159713	0.577151	-5.09369
Q9Y2T2	AP3M1	PMA	-0.170306	13.4968	-1.47589	0.159718	0.577151	-5.09371
P16083	NQO2	PMA	0.363089	14.1318	1.47588	0.159722	0.577151	-5.09374
Q8N960	CEP120	PMA	0.28751	10.9304	1.4749	0.159981	0.577151	-5.09501
Q8NHH9	ATL2	PMA	-0.264687	11.3651	-1.4744	0.160114	0.577151	-5.09566
Q96PK6	RBM14	PMA	0.156191	14.672	1.47421	0.160165	0.577151	-5.09591
Q16881	TXNRD1	PMA	-0.152963	15.0582	-1.47365	0.160314	0.577151	-5.09664
Q8NFH4	NUP37	PMA	0.339515	12.401	1.47312	0.160456	0.577151	-5.09734
Q9NSI8	SAMSN1	PMA	0.164582	13.8042	1.47304	0.160476	0.577151	-5.09744
Q9H4G4	GLIPR2	PMA	-0.195134	16.3836	-1.47295	0.160502	0.577151	-5.09756
Q8WWN9	IPCEF1	PMA	-0.308592	13.0393	-1.4728	0.160541	0.577151	-5.09775
Q8IY95	TMEM192	PMA	0.299553	12.0022	1.47276	0.160551	0.577151	-5.0978
P30566	ADSL	PMA	0.146808	13.6958	1.47273	0.160558	0.577151	-5.09784
Q86YS7	C2CD5	PMA	-0.164577	13.411	-1.47184	0.160795	0.577151	-5.099
Q99848	EBNA1BP2	PMA	0.712456	10.2657	1.4718	0.160806	0.577151	-5.09905
Q9UG63	ABCF2	PMA	0.194775	11.8461	1.47087	0.161054	0.577151	-5.10026
Q9H6U6	BCAS3	PMA	0.190769	11.8527	1.47086	0.161058	0.577151	-5.10027
Q9Y333	LSM2	PMA	0.274298	12.761	1.47046	0.161165	0.577151	-5.1008
P98196	ATP11A	PMA	-0.220223	12.0932	-1.47046	0.161166	0.577151	-5.1008
P26196	DDX6	PMA	-0.123893	16.0702	-1.46935	0.161463	0.577245	-5.10225
P01111	NRAS	PMA	-0.194212	14.8985	-1.46925	0.16149	0.577245	-5.10238
Q96GS4	BORCS6	PMA	0.164804	13.3358	1.46889	0.161585	0.577245	-5.10284
Q14004	CDK13	PMA	-0.307789	12.1791	-1.46863	0.161656	0.577245	-5.10318
P40925	MDH1	PMA	-0.12267	17.9416	-1.46838	0.161722	0.577245	-5.1035
Q14164	IKBKE	PMA	0.420072	11.6191	1.46745	0.161971	0.577756	-5.10471
Q15054	POLD3	PMA	-0.217534	16.4391	-1.46495	0.162645	0.57978	-5.10796
P78332	RBM6	PMA	-0.335838	12.7378	-1.4643	0.162818	0.58002	-5.1088
Q9NR30	DDX21	PMA	0.237337	13.0809	1.46378	0.16296	0.580146	-5.10948
P46531	NOTCH1	PMA	-0.435605	11.2545	-1.46089	0.163742	0.58255	-5.11323
Q8TEM1	NUP210	PMA	0.119994	14.1339	1.46015	0.163941	0.582879	-5.11419
Q96KA5	CLPTM1L	PMA	0.242603	11.1668	1.45802	0.164521	0.584423	-5.11695
P35659	DEK	PMA	-0.254039	15.6192	-1.45776	0.16459	0.584423	-5.11728
Q6UWE0	LRSAM1	PMA	-0.171047	11.9478	-1.45717	0.164751	0.584491	-5.11804
Q9HBL7	PLGRKT	PMA	0.341583	13.1636	1.4569	0.164823	0.584491	-5.11838
P49821	NDUFV1	PMA	0.121733	13.714	1.45563	0.16517	0.585077	-5.12003
Q01844	EWSR1	PMA	-0.281668	14.7429	-1.45491	0.165367	0.585077	-5.12096
Q9UJC5	SH3BGRL2	PMA	0.222283	11.2014	1.45483	0.165389	0.585077	-5.12106
P49588	AARS1	PMA	0.146975	12.7166	1.45449	0.165483	0.585077	-5.12151
Q9BPX7	C7orf25	PMA	-0.287922	12.5298	-1.45433	0.165525	0.585077	-5.12171
O94776	MTA2	PMA	0.127409	14.022	1.45253	0.166018	0.586438	-5.12403
Q15031	LARS2	PMA	0.261288	11.0034	1.45165	0.16626	0.586617	-5.12517
P41250	GARS1	PMA	0.133023	15.0523	1.45156	0.166283	0.586617	-5.12528
Q13586	STIM1	PMA	-0.15818	14.4748	-1.45094	0.166455	0.586844	-5.12609
Q9UJX4	ANAPC5	PMA	0.184005	11.4625	1.44948	0.166855	0.586871	-5.12796
Q9UKF7	PITPNC1	PMA	0.29158	11.9114	1.44927	0.166913	0.586871	-5.12823
Q99714	HSD17B10	PMA	0.137319	16.028	1.44901	0.166986	0.586871	-5.12858
O94855	SEC24D	PMA	0.191192	12.5901	1.44896	0.166999	0.586871	-5.12864
Q5VTL8	PRPF38B	PMA	-0.37669	13.7284	-1.44895	0.167001	0.586871	-5.12864
P78410	BTN3A2	PMA	-0.455347	9.57523	-1.44851	0.167124	0.586926	-5.12922
O95819	MAP4K4	PMA	-0.21017	13.122	-1.44758	0.167378	0.58744	-5.13041
Q6PD62	CTR9	PMA	0.136557	11.9011	1.44692	0.167561	0.58754	-5.13126
Q8NDH3	NPEPL1	PMA	0.138684	13.9652	1.44639	0.167709	0.58754	-5.13195
P51970	NDUFA8	PMA	-0.191639	12.9109	-1.44631	0.16773	0.58754	-5.13204
P53618	COPB1	PMA	-0.112387	15.7325	-1.44566	0.16791	0.587769	-5.13288
P01008	SERPINC1	PMA	0.273004	15.4313	1.44529	0.168011	0.587769	-5.13335
P56545	CTBP2	PMA	0.133512	15.2192	1.44396	0.168382	0.588542	-5.13507
P82673	MRPS35	PMA	0.449064	9.74043	1.44371	0.16845	0.588542	-5.13538
O95379	TNFAIP8	PMA	-0.161195	16.1026	-1.44333	0.168556	0.588542	-5.13587
Q68EM7	ARHGAP17	PMA	-0.13514	13.5971	-1.44282	0.168698	0.588661	-5.13653
P16284	PECAM1	PMA	-0.25045	13.8244	-1.44209	0.168899	0.588987	-5.13746
Q96M27	PRRC1	PMA	-0.221189	12.401	-1.44154	0.169052	0.589142	-5.13817
Q12959	DLG1	PMA	-0.251916	11.7455	-1.44048	0.169347	0.589182	-5.13953
Q96SB3	PPP1R9B	PMA	-0.205044	13.0679	-1.44048	0.169349	0.589182	-5.13954
O43150	ASAP2	PMA	-0.173439	14.7039	-1.44034	0.169387	0.589182	-5.13971
Q86V88	MDP1	PMA	-0.195887	14.4427	-1.43915	0.169718	0.589288	-5.14123
Q14765	STAT4	PMA	0.252309	9.91227	1.43857	0.169881	0.589288	-5.14198
Q6ZU80	CEP128	PMA	-0.418213	10.9416	-1.43845	0.169913	0.589288	-5.14213
P27694	RPA1	PMA	0.105857	14.4949	1.43778	0.170101	0.589288	-5.14299
Q8NFQ8	TOR1AIP2	PMA	0.225919	11.8263	1.43735	0.170221	0.589288	-5.14354
Q8IZ07	ANKRD13A	PMA	-0.201025	13.5009	-1.43717	0.170272	0.589288	-5.14377
O43929	ORC4	PMA	-0.195394	11.3696	-1.43689	0.17035	0.589288	-5.14413
O15067	PFAS	PMA	0.150984	14.306	1.43684	0.170364	0.589288	-5.14419
Q6ZT21	TMPPE	PMA	0.229894	12.0954	1.43675	0.17039	0.589288	-5.14431
O95822	MLYCD	PMA	-0.21847	11.2501	-1.43503	0.170872	0.59058	-5.14651
P20020	ATP2B1	PMA	-0.186225	13.1146	-1.43407	0.17114	0.591134	-5.14773
P09661	SNRPA1	PMA	-0.116846	15.4783	-1.43247	0.17159	0.591784	-5.14977
Q9H267	VPS33B	PMA	-0.203024	13.5414	-1.43143	0.171885	0.591784	-5.15111
P29083	GTF2E1	PMA	-0.749273	8.77604	-1.4314	0.171892	0.591784	-5.15114
P19474	TRIM21	PMA	-0.203148	14.5136	-1.43129	0.171923	0.591784	-5.15128
P52630	STAT2	PMA	0.152299	12.8168	1.43086	0.172044	0.591784	-5.15183
O75964	ATP5MG	PMA	0.269032	14.2003	1.43076	0.172073	0.591784	-5.15196
Q13191	CBLB	PMA	-0.429455	12.6252	-1.4305	0.172147	0.591784	-5.15229
Q9BR76	CORO1B	PMA	-0.107312	14.7774	-1.42956	0.172411	0.591784	-5.15348
P42679	MATK	PMA	-0.225301	15.4523	-1.42941	0.172454	0.591784	-5.15368
Q7Z4G1	COMMD6	PMA	-0.234138	11.4996	-1.42935	0.17247	0.591784	-5.15375
P10412	H1-4	PMA	-0.624098	21.0269	-1.42873	0.172647	0.591784	-5.15455
Q01813	PFKP	PMA	0.11666	13.9644	1.42819	0.1728	0.591784	-5.15524
Q96RR4	CAMKK2	PMA	-0.122911	13.6591	-1.42819	0.172801	0.591784	-5.15524
P46782	RPS5	PMA	-0.278053	14.6471	-1.42802	0.172848	0.591784	-5.15545
Q8TEV9	SMCR8	PMA	0.256613	10.9656	1.42763	0.172958	0.591789	-5.15595
Q9Y5L0	TNPO3	PMA	-0.173508	15.0379	-1.42716	0.173091	0.591873	-5.15654
Q13740	ALCAM	PMA	-0.371159	10.5619	-1.42641	0.173305	0.592142	-5.15751
Q96C23	GALM	PMA	0.180492	14.2895	1.42612	0.173387	0.592142	-5.15787
P08174	CD55	PMA	-0.15842	14.0524	-1.42522	0.173643	0.592647	-5.15902
Q9H845	ACAD9	PMA	0.135188	12.7883	1.42428	0.17391	0.593186	-5.16021
Q9BY27	DGCR6L	PMA	0.237967	12.1397	1.42299	0.174278	0.593779	-5.16185
P56556	NDUFA6	PMA	0.254167	12.2929	1.42231	0.174472	0.593779	-5.16272
Q8NI27	THOC2	PMA	0.128734	12.8829	1.42161	0.174671	0.593779	-5.1636
P33992	MCM5	PMA	0.304272	14.6398	1.42158	0.17468	0.593779	-5.16364
Q53QZ3	ARHGAP15	PMA	-0.212564	14.7325	-1.42139	0.174734	0.593779	-5.16388
Q92995	USP13	PMA	-0.311394	10.5866	-1.42138	0.174737	0.593779	-5.16389
Q5JSZ5	PRRC2B	PMA	-0.23183	12.6745	-1.42034	0.175033	0.594164	-5.16521
Q15413	RYR3	PMA	0.259966	12.1367	1.41981	0.175186	0.594164	-5.16588
Q9Y5Z4	HEBP2	PMA	0.167809	16.2753	1.41922	0.175357	0.594164	-5.16664
Q9Y6A9	SPCS1	PMA	-0.448047	11.1893	-1.41867	0.175514	0.594164	-5.16733
Q96BX8	MOB3A	PMA	0.124225	15.2238	1.41844	0.175579	0.594164	-5.16762
O60244	MED14	PMA	-0.193446	11.7023	-1.41827	0.175627	0.594164	-5.16783
A6NDG6	PGP	PMA	0.157614	15.0508	1.41819	0.17565	0.594164	-5.16794
Q7Z2W4	ZC3HAV1	PMA	0.151	13.4901	1.41794	0.175722	0.594164	-5.16825
P49257	LMAN1	PMA	-0.197226	14.5202	-1.41685	0.176035	0.594854	-5.16963
P13498	CYBA	PMA	-0.236399	17.9918	-1.41589	0.176311	0.595256	-5.17085
P53804	TTC3	PMA	0.27606	15.0693	1.41568	0.176372	0.595256	-5.17112
P51151	RAB9A	PMA	-0.138887	13.339	-1.41436	0.176752	0.59585	-5.17278
P08195	SLC3A2	PMA	0.115521	12.8146	1.41424	0.176788	0.59585	-5.17294
Q9P0L0	VAPA	PMA	-0.266153	14.4839	-1.41385	0.176901	0.59585	-5.17343
P17980	PSMC3	PMA	-0.151777	15.2821	-1.41324	0.177076	0.59585	-5.1742
Q71F56	MED13L	PMA	-0.440433	11.0469	-1.41318	0.177094	0.59585	-5.17428
P30044	PRDX5	PMA	0.141125	20.0691	1.41261	0.17726	0.59596	-5.175
Q9UER7	DAXX	PMA	-0.460194	10.0484	-1.41231	0.177346	0.59596	-5.17538
Q8N755	SLC66A3	PMA	0.154182	13.1034	1.41075	0.177796	0.596714	-5.17734
Q15006	EMC2	PMA	-0.314018	12.2679	-1.41056	0.177853	0.596714	-5.17759
Q92538	GBF1	PMA	-0.146016	12.9449	-1.4104	0.177898	0.596714	-5.17779
Q9UDY2	TJP2	PMA	0.286436	10.0757	1.40977	0.178082	0.596778	-5.17858
P62750	RPL23A	PMA	0.164727	16.1539	1.40947	0.178169	0.596778	-5.17896
O94913	PCF11	PMA	-0.257145	17.827	-1.40902	0.1783	0.596778	-5.17953
Q14554	PDIA5	PMA	-0.154606	13.3372	-1.40883	0.178355	0.596778	-5.17977
O43665	RGS10	PMA	-0.28251	12.2205	-1.40786	0.178636	0.597351	-5.18099
O43708	GSTZ1	PMA	0.251798	12.9081	1.40726	0.178811	0.59757	-5.18174
Q9NZD2	GLTP	PMA	-0.211114	13.8979	-1.40665	0.17899	0.597803	-5.18252
Q684P5	RAP1GAP2	PMA	0.142487	13.7548	1.40572	0.179259	0.598029	-5.18368
O14979	HNRNPDL	PMA	0.147549	16.6944	1.40566	0.179277	0.598029	-5.18376
Q9H871	RMND5A	PMA	0.218476	10.9635	1.40387	0.179799	0.598159	-5.18601
Q6P1X6	C8orf82	PMA	0.447588	9.71839	1.4035	0.17991	0.598159	-5.18648
Q16656	NRF1	PMA	0.159819	14.3978	1.40327	0.179977	0.598159	-5.18677
Q9UBI9	HECA	PMA	0.222832	10.709	1.40314	0.180015	0.598159	-5.18693
Q9HC21	SLC25A19	PMA	0.276506	10.6758	1.4031	0.180026	0.598159	-5.18698
Q9HD45	TM9SF3	PMA	-0.411157	13.8192	-1.40275	0.180128	0.598159	-5.18742
O43447	PPIH	PMA	0.13657	14.9263	1.40266	0.180155	0.598159	-5.18753
P37802	TAGLN2	PMA	0.166247	19.109	1.40103	0.180634	0.598159	-5.18958
P50750	CDK9	PMA	0.22112	18.0067	1.40078	0.180706	0.598159	-5.18989
Q9UJS0	SLC25A13	PMA	0.132645	12.5827	1.40066	0.180741	0.598159	-5.19004
Q92896	GLG1	PMA	-0.223594	12.4449	-1.40049	0.180791	0.598159	-5.19025
Q6NZY4	ZCCHC8	PMA	-0.183425	12.1514	-1.40008	0.180911	0.598159	-5.19077
O95470	SGPL1	PMA	-0.227364	12.9047	-1.39977	0.181003	0.598159	-5.19116
Q8NEZ3	WDR19	PMA	0.250502	11.1044	1.39935	0.181126	0.598159	-5.19168
P51149	RAB7A	PMA	0.112344	18.8653	1.39858	0.181355	0.598159	-5.19266
Q5JTV8	TOR1AIP1	PMA	-0.151041	16.6057	-1.39835	0.181421	0.598159	-5.19294
Q9H0S4	DDX47	PMA	0.602089	10.6272	1.3981	0.181494	0.598159	-5.19325
Q14157	UBAP2L	PMA	0.217989	13.1345	1.39736	0.181713	0.598159	-5.19418
Q6PCB8	EMB	PMA	-0.277558	12.8284	-1.39698	0.181825	0.598159	-5.19466
Q9BQ61	TRIR	PMA	-0.360757	13.7616	-1.39693	0.181839	0.598159	-5.19472
P25774	CTSS	PMA	0.132623	15.4229	1.39667	0.181917	0.598159	-5.19504
Q14344	GNA13	PMA	-0.112966	19.2006	-1.39644	0.181985	0.598159	-5.19533
P09417	QDPR	PMA	-0.118105	14.8555	-1.39628	0.182031	0.598159	-5.19553
P78527	PRKDC	PMA	0.0946154	16.2387	1.39584	0.182162	0.598159	-5.19608
P37275	ZEB1	PMA	-0.399424	12.0855	-1.39553	0.182254	0.598159	-5.19647
P56524	HDAC4	PMA	0.15543	12.7095	1.39536	0.182306	0.598159	-5.19669
Q96AX1	VPS33A	PMA	-0.141916	14.3061	-1.39495	0.182425	0.598159	-5.1972
P00367	GLUD1	PMA	0.129153	14.6411	1.3949	0.182439	0.598159	-5.19725
Q92688	ANP32B	PMA	-0.160543	16.6879	-1.3943	0.182618	0.598159	-5.19801
Q5VTR2	RNF20	PMA	-0.151519	11.6284	-1.39411	0.182673	0.598159	-5.19824
O00443	PIK3C2A	PMA	-0.333707	13.6029	-1.39397	0.182716	0.598159	-5.19842
Q9H7D7	WDR26	PMA	0.209407	12.4657	1.39305	0.182988	0.598525	-5.19957
P62826	RAN	PMA	0.125396	17.6419	1.39259	0.183124	0.598525	-5.20014
Q13535	ATR	PMA	-0.554411	12.8282	-1.39248	0.183157	0.598525	-5.20028
O00170	AIP	PMA	0.104133	14.9408	1.39144	0.183467	0.59918	-5.20158
Q96CW1	AP2M1	PMA	0.118436	14.9984	1.38981	0.183952	0.599802	-5.20362
Q15532	SS18	PMA	0.450793	10.9472	1.38953	0.184036	0.599802	-5.20397
Q13546	RIPK1	PMA	-0.125509	13.8195	-1.38948	0.184051	0.599802	-5.20403
Q32P28	P3H1	PMA	-0.405477	9.54721	-1.38858	0.18432	0.599802	-5.20516
Q8N3P4	VPS8	PMA	-0.119541	12.8496	-1.38841	0.184369	0.599802	-5.20536
Q96K19	RNF170	PMA	-0.487718	12.0872	-1.38784	0.184541	0.599802	-5.20608
P49674	CSNK1E	PMA	-0.238707	12.5209	-1.38745	0.184658	0.599802	-5.20657
Q96F63	CCDC97	PMA	-0.409598	11.4561	-1.3873	0.1847	0.599802	-5.20674
Q9H9T3	ELP3	PMA	0.123685	14.1692	1.38683	0.184844	0.599802	-5.20734
P09211	GSTP1	PMA	0.147598	18.8562	1.38625	0.185016	0.599802	-5.20805
Q8N3D4	EHBP1L1	PMA	-0.160245	12.7812	-1.38587	0.18513	0.599802	-5.20853
Q9P2X0	DPM3	PMA	0.235692	12.1887	1.38435	0.185585	0.599802	-5.21042
Q86U06	RBM23	PMA	0.323937	10.3348	1.38373	0.185772	0.599802	-5.21119
Q9H6V9	LDAH	PMA	0.165846	12.9274	1.38369	0.185782	0.599802	-5.21123
Q96HY6	DDRGK1	PMA	-0.420749	11.9955	-1.38369	0.185783	0.599802	-5.21124
Q16637	SMN1	PMA	-0.441461	11.4873	-1.38342	0.185863	0.599802	-5.21157
Q9ULM6		PMA	0.252294	11.2124	1.38338	0.185876	0.599802	-5.21162
Q9Y572	RIPK3	PMA	-0.207658	12.1628	-1.38243	0.186161	0.599802	-5.2128
P23219	PTGS1	PMA	0.212464	13.3242	1.38179	0.186355	0.599802	-5.2136
Q8N999	C12orf29	PMA	0.237123	12.6555	1.3817	0.186384	0.599802	-5.21372
Q9UKK9	NUDT5	PMA	-0.153413	15.9019	-1.38092	0.186619	0.599802	-5.21469
Q7L1T6	CYB5R4	PMA	0.157786	13.1604	1.38068	0.186689	0.599802	-5.21498
P49207	RPL34	PMA	0.43848	14.2648	1.38058	0.186719	0.599802	-5.2151
P49006	MARCKSL1	PMA	-0.315909	12.4655	-1.3803	0.186804	0.599802	-5.21545
Q16831	UPP1	PMA	0.192806	13.0258	1.3802	0.186835	0.599802	-5.21558
Q96SB4	SRPK1	PMA	-0.165788	13.812	-1.37986	0.186938	0.599802	-5.216
Q4G0J3	LARP7	PMA	-0.154268	13.2684	-1.37971	0.186983	0.599802	-5.21618
P83876	TXNL4A	PMA	-0.27021	10.975	-1.37969	0.186987	0.599802	-5.2162
O00308	WWP2	PMA	-0.135044	13.3902	-1.37942	0.187069	0.599802	-5.21654
Q6NUK4	REEP3	PMA	0.661538	10.5187	1.37894	0.187215	0.599802	-5.21714
O95373	IPO7	PMA	-0.156162	13.5743	-1.37888	0.187233	0.599802	-5.21721
O00264	PGRMC1	PMA	0.169999	13.8117	1.37871	0.187284	0.599802	-5.21742
P61225	RAP2B	PMA	-0.295644	14.7713	-1.37831	0.187404	0.599802	-5.21791
Q8IY18	SMC5	PMA	0.17297	11.2082	1.37815	0.187455	0.599802	-5.21812
A1L0T0	ILVBL	PMA	0.147187	12.2777	1.37798	0.187507	0.599802	-5.21833
O60343	TBC1D4	PMA	-0.258867	12.5027	-1.37753	0.187642	0.599883	-5.21889
Q14738	PPP2R5D	PMA	0.13496	13.5071	1.37595	0.188122	0.600387	-5.22085
Q6AI08	HEATR6	PMA	0.312313	14.606	1.37581	0.188163	0.600387	-5.22101
Q8N9V3	WDSUB1	PMA	-0.262966	11.1627	-1.37567	0.188205	0.600387	-5.22119
Q8NEW0	SLC30A7	PMA	-0.126742	13.9802	-1.37555	0.188242	0.600387	-5.22133
P07437	TUBB	PMA	0.182628	18.613	1.37518	0.188355	0.600387	-5.2218
Q9HCK5	AGO4	PMA	-0.100579	14.2984	-1.37452	0.188555	0.600387	-5.22261
Q8IWB7	WDFY1	PMA	-0.135346	14.0467	-1.37426	0.188635	0.600387	-5.22293
Q58FF8		PMA	0.510094	13.3675	1.37381	0.188772	0.600387	-5.22349
P08246	ELANE	PMA	-0.315299	18.9004	-1.37335	0.188911	0.600387	-5.22406
Q6ICL3	TANGO2	PMA	-0.359516	13.481	-1.37308	0.188994	0.600387	-5.22439
P49770	EIF2B2	PMA	0.309367	11.6886	1.37302	0.189011	0.600387	-5.22446
Q13315	ATM	PMA	0.110602	13.7982	1.37112	0.189592	0.601884	-5.22682
Q7L2E3	DHX30	PMA	0.252042	10.9505	1.37048	0.189788	0.602056	-5.22761
O00267	SUPT5H	PMA	-0.116744	12.8945	-1.36989	0.189969	0.602056	-5.22834
P86791	CCZ1	PMA	-0.1213	12.8173	-1.36986	0.189978	0.602056	-5.22837
Q9BSJ8	ESYT1	PMA	-0.12815	15.3578	-1.36903	0.190232	0.602121	-5.2294
P83111	LACTB	PMA	-0.206968	13.0278	-1.36901	0.190235	0.602121	-5.22941
Q9BTD8	RBM42	PMA	0.229307	11.6727	1.36871	0.190329	0.602121	-5.22979
Q99795	GPA33	PMA	-0.272626	14.3417	-1.36798	0.190553	0.602479	-5.23069
Q9Y2U5	MAP3K2	PMA	-0.15368	13.4278	-1.367	0.190854	0.602635	-5.23189
Q6P9G4	TMEM154	PMA	-0.319002	12.2125	-1.36609	0.191134	0.602635	-5.23302
P26583	HMGB2	PMA	-0.435078	19.3765	-1.36602	0.191154	0.602635	-5.2331
P22314	UBA1	PMA	-0.135379	17.1558	-1.36583	0.191214	0.602635	-5.23334
Q9ULK4	MED23	PMA	0.0977177	13.7671	1.36556	0.191295	0.602635	-5.23366
P46940	IQGAP1	PMA	-0.184053	17.7091	-1.36552	0.191307	0.602635	-5.23371
Q8NBX0	SCCPDH	PMA	0.168643	15.1273	1.36507	0.191446	0.602635	-5.23426
P02768	ALB	PMA	0.192637	20.0617	1.36494	0.191487	0.602635	-5.23443
Q8WV22	NSMCE1	PMA	-0.492704	10.3039	-1.36454	0.191609	0.602635	-5.23492
Q9NR45	NANS	PMA	-0.146787	15.5917	-1.36422	0.191707	0.602635	-5.23531
P13473	LAMP2	PMA	-0.310482	17.1747	-1.36303	0.192076	0.603447	-5.23678
Q9Y2A7	NCKAP1	PMA	0.414846	14.8151	1.36253	0.192229	0.603579	-5.23739
Q8WVC0	LEO1	PMA	-0.202814	11.4603	-1.36187	0.192434	0.603874	-5.2382
Q9H832	UBE2Z	PMA	0.154941	13.1917	1.36147	0.192557	0.603914	-5.23869
P62253	UBE2G1	PMA	0.299953	12.3163	1.36082	0.192759	0.603941	-5.23949
Q9Y547	IFT25	PMA	0.425942	11.2962	1.36073	0.192787	0.603941	-5.2396
Q9Y5X3	SNX5	PMA	0.119928	14.7342	1.36031	0.192915	0.603995	-5.24011
Q9UFG5	C19orf25	PMA	-0.639752	14.4582	-1.35948	0.193172	0.604453	-5.24113
Q93084	ATP2A3	PMA	-0.0937052	15.7249	-1.35912	0.193287	0.604464	-5.24158
Q9NRW1	RAB6B	PMA	0.429631	14.0863	1.35789	0.193666	0.604504	-5.24308
P21127	CDK11B	PMA	0.120579	14.7194	1.3578	0.193696	0.604504	-5.2432
P04792	HSPB1	PMA	0.244182	12.8455	1.35778	0.193703	0.604504	-5.24322
Q9UKW4	VAV3	PMA	-0.174103	12.9101	-1.35746	0.1938	0.604504	-5.24361
O00418	EEF2K	PMA	0.291677	12.1779	1.35729	0.193854	0.604504	-5.24382
O00273	DFFA	PMA	-0.169625	11.6852	-1.35565	0.194364	0.605749	-5.24583
P29558	RBMS1	PMA	-0.207528	11.8363	-1.3551	0.194535	0.605799	-5.2465
P17947	SPI1	PMA	-0.620553	14.3497	-1.35489	0.194602	0.605799	-5.24676
Q92575	UBXN4	PMA	0.325748	10.8491	1.35306	0.195172	0.607228	-5.24899
P25105	PTAFR	PMA	-0.479401	10.1063	-1.35135	0.195707	0.608262	-5.25108
Q15349	RPS6KA2	PMA	-0.180083	14.402	-1.35129	0.195728	0.608262	-5.25116
Q96AA3	RFT1	PMA	-0.192022	14.0722	-1.35045	0.19599	0.60873	-5.25218
Q86X83	COMMD2	PMA	0.330827	13.5788	1.34879	0.196512	0.609137	-5.25421
O00422	SAP18	PMA	0.27343	14.449	1.34844	0.19662	0.609137	-5.25462
Q53H96	PYCR3	PMA	0.16737	11.4542	1.34827	0.196674	0.609137	-5.25483
P20073	ANXA7	PMA	0.117862	16.5616	1.34806	0.196742	0.609137	-5.2551
O95721	SNAP29	PMA	-0.136734	13.3105	-1.34742	0.196943	0.609137	-5.25587
O14745	NHERF1	PMA	-0.149676	14.8011	-1.34631	0.197292	0.609137	-5.25722
Q9H0E2	TOLLIP	PMA	-0.143196	14.8096	-1.34627	0.197305	0.609137	-5.25727
Q9BWJ5	SF3B5	PMA	-0.245265	12.0518	-1.34626	0.19731	0.609137	-5.25729
P62306	SNRPF	PMA	0.161493	15.4863	1.34584	0.197441	0.609137	-5.2578
P20936	RASA1	PMA	0.151842	12.9127	1.34581	0.197451	0.609137	-5.25783
Q9HCG7	GBA2	PMA	0.483001	8.63037	1.3457	0.197484	0.609137	-5.25797
P05091	ALDH2	PMA	0.0995334	15.3614	1.34457	0.197841	0.609137	-5.25934
P08311	CTSG	PMA	0.183273	20.8994	1.34414	0.197979	0.609137	-5.25987
P46063	RECQL	PMA	0.119325	14.6331	1.34412	0.197983	0.609137	-5.25988
P02788	LTF	PMA	0.115634	21.8599	1.34398	0.198027	0.609137	-5.26005
Q99986	VRK1	PMA	-0.244862	14.9905	-1.3439	0.198055	0.609137	-5.26016
Q8TB52	FBXO30	PMA	-0.455587	10.1244	-1.34364	0.198135	0.609137	-5.26047
Q13416	ORC2	PMA	0.366045	10.3551	1.34312	0.198301	0.609137	-5.26111
P18583	SON	PMA	0.210985	13.9704	1.34291	0.198368	0.609137	-5.26136
Q6IPX3		PMA	0.293578	12.2665	1.34202	0.19865	0.609137	-5.26244
P67812	SEC11A	PMA	0.15661	16.6443	1.34176	0.19873	0.609137	-5.26275
Q96T76	MMS19	PMA	0.121619	12.3341	1.34154	0.198802	0.609137	-5.26302
Q9H8M5	CNNM2	PMA	-0.151704	15.6882	-1.34122	0.198904	0.609137	-5.26341
P84103	SRSF3	PMA	0.164896	17.2424	1.34107	0.19895	0.609137	-5.26359
Q9BYD6	MRPL1	PMA	-0.288945	13.0058	-1.341	0.198972	0.609137	-5.26368
P54819	AK2	PMA	0.141022	16.6964	1.33958	0.199423	0.609137	-5.26539
P24557	TBXAS1	PMA	0.13406	14.3819	1.33909	0.199579	0.609137	-5.26599
P48444	ARCN1	PMA	0.0993116	15.311	1.33883	0.199664	0.609137	-5.26631
P04181	OAT	PMA	0.129632	16.623	1.33857	0.199745	0.609137	-5.26662
Q969U7	PSMG2	PMA	0.279489	12.7955	1.33839	0.199803	0.609137	-5.26684
Q92925	SMARCD2	PMA	-0.15627	12.8275	-1.33816	0.199876	0.609137	-5.26712
Q8TDN6	BRIX1	PMA	-0.257407	11.175	-1.338	0.199927	0.609137	-5.26731
Q14137	BOP1	PMA	0.577596	12.7507	1.33781	0.199987	0.609137	-5.26754
Q99719	SEPTIN5	PMA	0.144023	15.6583	1.33771	0.20002	0.609137	-5.26767
Q8TD55	PLEKHO2	PMA	-0.134942	15.3392	-1.33688	0.200285	0.609137	-5.26867
Q9UK53	ING1	PMA	-0.511884	9.82412	-1.3363	0.200469	0.609137	-5.26937
Q8N1G2	CMTR1	PMA	-0.186442	12.2753	-1.3352	0.20082	0.609137	-5.2707
Q9NVR2	INTS10	PMA	0.12988	11.9166	1.33507	0.200862	0.609137	-5.27086
Q9Y2Q5	LAMTOR2	PMA	-0.197345	15.6442	-1.33454	0.201031	0.609137	-5.27149
P31146	CORO1A	PMA	0.112561	19.7857	1.33453	0.201037	0.609137	-5.27152
Q96G23	CERS2	PMA	-0.285412	11.8726	-1.33427	0.20112	0.609137	-5.27183
Q96ER9	CCDC51	PMA	-0.500568	9.46623	-1.33412	0.201167	0.609137	-5.27201
Q9NPD3	EXOSC4	PMA	0.227836	12.9108	1.33409	0.201176	0.609137	-5.27204
P0CG39	POTEJ	PMA	-0.559714	10.7294	-1.33374	0.201288	0.609137	-5.27246
P48729	CSNK1A1	PMA	0.101243	13.3199	1.33321	0.201458	0.609137	-5.2731
P62241	RPS8	PMA	-0.318339	15.0859	-1.3332	0.201462	0.609137	-5.27312
P54578	USP14	PMA	-0.183209	14.7352	-1.33205	0.201831	0.609137	-5.27451
O75330	HMMR	PMA	-0.307371	11.7902	-1.33203	0.201837	0.609137	-5.27453
Q8N4C8	MINK1	PMA	0.184924	13.011	1.33161	0.201972	0.609137	-5.27504
Q96BR1	SGK3	PMA	-0.254302	12.1294	-1.33151	0.202003	0.609137	-5.27515
Q9Y2X9	ZNF281	PMA	-0.400573	10.5802	-1.33111	0.202131	0.609137	-5.27564
Q9Y4E8	USP15	PMA	-0.123722	13.9576	-1.33086	0.202213	0.609137	-5.27594
Q96C19	EFHD2	PMA	-0.13663	18.1668	-1.33077	0.202242	0.609137	-5.27605
Q13501	SQSTM1	PMA	-0.162228	12.0781	-1.33074	0.202254	0.609137	-5.27609
Q9NQY0	BIN3	PMA	-0.40203	10.3239	-1.3307	0.202264	0.609137	-5.27613
Q5THJ4	VPS13D	PMA	0.36924	10.5671	1.3303	0.202393	0.609189	-5.27662
Q6UWP2	DHRS11	PMA	-0.307036	10.882	-1.32854	0.202961	0.610256	-5.27874
Q9Y3D7	PAM16	PMA	-0.416926	11.8712	-1.32851	0.202971	0.610256	-5.27878
O15118	NPC1	PMA	-0.252205	12.2975	-1.32735	0.203344	0.611019	-5.28017
Q9UPN9	TRIM33	PMA	-0.150716	12.0004	-1.32703	0.203449	0.611019	-5.28056
Q6NUQ4	TMEM214	PMA	0.160946	12.4836	1.32593	0.203804	0.611749	-5.28188
Q9NPA0	EMC7	PMA	-0.155923	11.7113	-1.32484	0.204157	0.61247	-5.28319
Q9NRD1	FBXO6	PMA	0.421913	11.371	1.3243	0.204333	0.612662	-5.28384
P63000	RAC1	PMA	0.119495	17.3722	1.32214	0.205034	0.614426	-5.28643
Q9HBF4	ZFYVE1	PMA	-0.150585	12.2323	-1.32022	0.205659	0.615543	-5.28873
Q13418	ILK	PMA	0.126931	15.5814	1.31981	0.205792	0.615543	-5.28922
Q8TD17	ZNF398	PMA	0.184972	14.9031	1.31981	0.205793	0.615543	-5.28922
P08631	HCK	PMA	-0.243611	15.8979	-1.31961	0.205858	0.615543	-5.28947
Q5VT52	RPRD2	PMA	0.169167	14.5584	1.31838	0.206258	0.615969	-5.29093
A8MWD9		PMA	0.296562	15.1001	1.31837	0.206262	0.615969	-5.29095
Q7L9L4	MOB1B	PMA	-0.151013	14.0313	-1.31814	0.206339	0.615969	-5.29123
P16298	PPP3CB	PMA	0.134155	14.5897	1.31768	0.20649	0.616081	-5.29178
Q9P107	GMIP	PMA	-0.125372	15.1515	-1.31702	0.206705	0.616105	-5.29257
Q9UPN7	PPP6R1	PMA	-0.15319	14.9366	-1.31692	0.206739	0.616105	-5.29269
O15162	PLSCR1	PMA	-0.752472	13.1648	-1.31624	0.206959	0.616105	-5.2935
P08243	ASNS	PMA	-0.225855	11.9552	-1.31566	0.207151	0.616105	-5.29419
Q9P2E9	RRBP1	PMA	-0.170797	13.1777	-1.31553	0.207192	0.616105	-5.29434
P43307	SSR1	PMA	0.143332	14.9068	1.3154	0.207237	0.616105	-5.29451
Q9H6Z4	RANBP3	PMA	-0.150201	12.6621	-1.31506	0.207347	0.616105	-5.29491
Q0VD83	APOBR	PMA	-0.172116	16.172	-1.31489	0.207402	0.616105	-5.29511
Q12768	WASHC5	PMA	-0.128814	14.6782	-1.31351	0.207857	0.616402	-5.29676
O43293	DAPK3	PMA	-0.397613	10.3396	-1.31329	0.207929	0.616402	-5.29703
P62829	RPL23	PMA	0.190544	14.4348	1.31322	0.207952	0.616402	-5.29711
Q8TB40	ABHD4	PMA	-0.195338	11.569	-1.31321	0.207954	0.616402	-5.29711
Q9NR81	ARHGEF3	PMA	0.363482	13.6758	1.31262	0.208149	0.616644	-5.29782
Q6P996	PDXDC1	PMA	0.133047	12.3412	1.31158	0.208491	0.617324	-5.29906
P47756	CAPZB	PMA	-0.19096	18.8443	-1.31063	0.208805	0.617657	-5.3002
Q99836	MYD88	PMA	0.191993	13.7769	1.31055	0.20883	0.617657	-5.30029
Q8NFH3	NUP43	PMA	0.13669	13.4373	1.3102	0.208947	0.617668	-5.30071
Q5H9R7	PPP6R3	PMA	-0.128627	13.1936	-1.30869	0.209446	0.618807	-5.3025
P60983	GMFB	PMA	0.352634	13.2824	1.30638	0.21021	0.619767	-5.30525
P42285	MTREX	PMA	0.127374	13.971	1.30609	0.210307	0.619767	-5.3056
P41240	CSK	PMA	0.113628	16.9714	1.30579	0.210406	0.619767	-5.30595
Q9H410	DSN1	PMA	-0.18559	11.6078	-1.30573	0.210426	0.619767	-5.30602
Q9UBX3	SLC25A10	PMA	0.147405	12.9733	1.30481	0.210733	0.619767	-5.30712
Q6ZMI0	PPP1R21	PMA	-0.128354	12.7555	-1.30439	0.210871	0.619767	-5.30761
P53677	AP3M2	PMA	0.272516	13.8914	1.30423	0.210924	0.619767	-5.3078
P17706	PTPN2	PMA	-0.161106	12.9882	-1.30395	0.21102	0.619767	-5.30814
Q7Z6I8	C5orf24	PMA	-0.342866	12.5915	-1.30385	0.211053	0.619767	-5.30826
P35236	PTPN7	PMA	-0.1445	14.9143	-1.30364	0.211122	0.619767	-5.30851
Q9UPS6		PMA	0.273735	9.82406	1.30356	0.21115	0.619767	-5.30861
Q99497	PARK7	PMA	-0.165738	17.0624	-1.30355	0.211152	0.619767	-5.30861
Q9Y2H0	DLGAP4	PMA	-0.352021	11.3754	-1.30326	0.211248	0.619767	-5.30896
Q9NVS9	PNPO	PMA	0.155727	13.3703	1.30258	0.211476	0.620103	-5.30977
P63162	SNRPN	PMA	0.165686	14.3416	1.30213	0.211626	0.62021	-5.3103
Q9HBH0	RHOF	PMA	0.136183	13.5491	1.30077	0.212078	0.621029	-5.3119
Q9H0E9	BRD8	PMA	0.129	12.1347	1.30061	0.212134	0.621029	-5.3121
Q5HYI8	RABL3	PMA	-0.142372	12.8088	-1.29988	0.212378	0.621411	-5.31297
Q9H1A3	METTL9	PMA	0.297423	11.5232	1.29939	0.212541	0.621554	-5.31354
Q9NZ45	CISD1	PMA	0.187648	12.4212	1.29618	0.213616	0.624217	-5.31734
Q8TCT9	HM13	PMA	-0.355829	15.6569	-1.29599	0.21368	0.624217	-5.31756
P27361	MAPK3	PMA	0.133454	17.0223	1.29514	0.213966	0.624357	-5.31856
Q6IBS0	TWF2	PMA	-0.143521	15.975	-1.29488	0.214055	0.624357	-5.31888
Q9Y2G2	CARD8	PMA	0.107695	12.5925	1.29483	0.214072	0.624357	-5.31893
Q13232	NME3	PMA	-0.325522	12.2355	-1.29292	0.214716	0.625902	-5.32119
Q9H479	FN3K	PMA	-0.263208	11.1995	-1.29169	0.215131	0.626353	-5.32264
Q6NXR4	TTI2	PMA	0.184232	11.8511	1.29152	0.215188	0.626353	-5.32283
Q5JU69	TOR2A	PMA	0.184877	12.9054	1.29144	0.215216	0.626353	-5.32293
Q567U6	CCDC93	PMA	-0.174313	13.9859	-1.29086	0.215409	0.626582	-5.32361
Q17RY0	CPEB4	PMA	-0.228767	11.1333	-1.29005	0.215685	0.626932	-5.32457
Q9UH03	SEPTIN3	PMA	0.366886	12.0657	1.28975	0.215787	0.626932	-5.32492
P07947	YES1	PMA	0.207858	14.2954	1.28935	0.215921	0.626932	-5.32539
Q9HBM6	TAF9B	PMA	0.260106	10.4633	1.28915	0.215989	0.626932	-5.32562
Q8NB78	KDM1B	PMA	0.179607	11.8742	1.28806	0.216358	0.627495	-5.3269
P00390	GSR	PMA	-0.122107	18.2029	-1.2878	0.216448	0.627495	-5.32721
Q86UY8	NT5DC3	PMA	0.125336	12.0525	1.28727	0.216629	0.627495	-5.32784
P13073	COX4I1	PMA	-0.130286	15.6126	-1.28722	0.216643	0.627495	-5.32789
Q5VVQ6	YOD1	PMA	0.142594	12.4983	1.28613	0.217015	0.628093	-5.32917
Q7Z6P3		PMA	-0.199228	14.7864	-1.28594	0.21708	0.628093	-5.3294
P18510	IL1RN	PMA	-0.416795	11.4189	-1.28444	0.217592	0.628562	-5.33116
O95563	MPC2	PMA	0.167869	12.8505	1.28401	0.217737	0.628562	-5.33166
Q9H2D6	TRIOBP	PMA	-0.158515	12.5127	-1.28361	0.217875	0.628562	-5.33213
Q9HBL8	NMRAL1	PMA	-0.268363	11.3247	-1.28306	0.218062	0.628562	-5.33277
Q14689	DIP2A	PMA	0.126098	12.5507	1.28253	0.218242	0.628562	-5.33339
O60870	KIN	PMA	-0.478872	9.77562	-1.28242	0.218282	0.628562	-5.33352
Q9NY12	GAR1	PMA	0.113555	13.9946	1.28227	0.218331	0.628562	-5.33369
Q8TEW8	PARD3B	PMA	0.232738	12.0208	1.28219	0.218358	0.628562	-5.33379
Q9UNM6	PSMD13	PMA	0.107798	15.3278	1.28181	0.218489	0.628562	-5.33423
P30740	SERPINB1	PMA	-0.0972044	20.1357	-1.28131	0.21866	0.628562	-5.33482
Q9UMN6	KMT2B	PMA	-0.29715	11.7199	-1.28106	0.218745	0.628562	-5.33511
Q9H6Y7	RNF167	PMA	-0.238996	12.3567	-1.28083	0.218823	0.628562	-5.33538
Q9GZN8	ADISSP	PMA	-0.135443	14.9924	-1.28039	0.218974	0.628562	-5.33589
O43813	LANCL1	PMA	-0.184584	14.07	-1.28	0.219108	0.628562	-5.33635
O75746	SLC25A12	PMA	0.117735	13.1527	1.27986	0.219156	0.628562	-5.33651
Q92696	RABGGTA	PMA	0.0999063	13.0628	1.2796	0.219247	0.628562	-5.33682
Q9NSV4	DIAPH3	PMA	-0.398673	13.0734	-1.27955	0.219263	0.628562	-5.33688
Q8IYD8	FANCM	PMA	-0.87909	13.8438	-1.27918	0.21939	0.628562	-5.33731
O75113	N4BP1	PMA	-0.110307	12.9601	-1.27874	0.21954	0.628562	-5.33782
P16615	ATP2A2	PMA	0.119393	14.7454	1.27872	0.219547	0.628562	-5.33785
P16520	GNB3	PMA	0.514028	13.9825	1.27768	0.219907	0.629036	-5.33907
O15085	ARHGEF11	PMA	0.158492	11.6384	1.27741	0.22	0.629036	-5.33938
Q8IVW6	ARID3B	PMA	0.184791	12.9407	1.27723	0.220059	0.629036	-5.33958
O76021	RSL1D1	PMA	0.255944	11.4893	1.27671	0.220241	0.629226	-5.3402
P18754	RCC1	PMA	0.134084	14.5773	1.27567	0.220598	0.629523	-5.34141
Q15643	TRIP11	PMA	-0.208986	11.3767	-1.27551	0.220653	0.629523	-5.3416
O95071	UBR5	PMA	0.162767	12.0409	1.2754	0.220691	0.629523	-5.34173
P22392	NME2	PMA	0.140271	17.2432	1.27415	0.221122	0.630423	-5.34318
Q9Y314	NOSIP	PMA	0.223762	11.887	1.27362	0.221304	0.630613	-5.3438
Q9Y295	DRG1	PMA	-0.122293	13.884	-1.27026	0.222468	0.633598	-5.34771
O15033	AREL1	PMA	0.241911	11.7932	1.2689	0.222939	0.633752	-5.34928
Q7L014	DDX46	PMA	0.117426	14.085	1.2687	0.223008	0.633752	-5.34951
P60900	PSMA6	PMA	0.0850865	16.7127	1.26839	0.223119	0.633752	-5.34988
Q16864	ATP6V1F	PMA	-0.181435	12.8485	-1.26783	0.223313	0.633752	-5.35053
O43172	PRPF4	PMA	-0.129661	13.8191	-1.26777	0.223333	0.633752	-5.3506
Q96KN1	LRATD2	PMA	-0.375748	15.0698	-1.26738	0.22347	0.633752	-5.35105
Q5CZC0	FSIP2	PMA	0.356027	11.5953	1.2673	0.223497	0.633752	-5.35115
O60674	JAK2	PMA	-0.199175	11.7099	-1.26706	0.223581	0.633752	-5.35142
Q14558	PRPSAP1	PMA	-0.181641	14.6658	-1.26683	0.22366	0.633752	-5.35169
O95571	ETHE1	PMA	0.109577	15.7424	1.26627	0.223856	0.633752	-5.35234
Q9Y5B8	NME7	PMA	-0.332737	10.2609	-1.26584	0.224005	0.633752	-5.35283
Q6DKJ4	NXN	PMA	0.35803	10.6925	1.26556	0.224102	0.633752	-5.35316
Q9ULP9	TBC1D24	PMA	0.178264	12.0327	1.26541	0.224155	0.633752	-5.35333
Q9NRY4	ARHGAP35	PMA	-0.118852	13.0348	-1.26511	0.224261	0.633752	-5.35368
Q9UBQ5	EIF3K	PMA	-0.118642	14.1827	-1.26446	0.224486	0.633752	-5.35443
Q8NFP9	NBEA	PMA	0.181309	12.1798	1.26443	0.224497	0.633752	-5.35447
P08621	SNRNP70	PMA	-0.2415	15.7593	-1.26443	0.224497	0.633752	-5.35447
P56159	GFRA1	PMA	0.229955	12.4961	1.26331	0.22489	0.633862	-5.35577
Q71DI3	H3C14	PMA	-0.191597	20.5951	-1.26318	0.224937	0.633862	-5.35592
Q96JM3	CHAMP1	PMA	0.156703	11.843	1.26287	0.225043	0.633862	-5.35627
Q96PE3	INPP4A	PMA	-0.0859645	13.0688	-1.26274	0.225089	0.633862	-5.35642
Q16515	ASIC2	PMA	-0.29227	12.0842	-1.26241	0.225205	0.633862	-5.35681
P16435	POR	PMA	-0.152627	15.0419	-1.26178	0.225425	0.633862	-5.35753
P07814	EPRS1	PMA	-0.131279	14.6204	-1.26146	0.225539	0.633862	-5.35791
P00450	CP	PMA	-0.189276	11.2165	-1.26131	0.225591	0.633862	-5.35808
Q96AB3	ISOC2	PMA	-0.21393	12.1178	-1.26118	0.225637	0.633862	-5.35823
Q8TB72	PUM2	PMA	-0.186702	12.525	-1.261	0.225698	0.633862	-5.35843
Q6JQN1	ACAD10	PMA	-0.209414	11.6273	-1.25968	0.226164	0.634215	-5.35997
Q2PZI1	DPY19L1	PMA	-0.18147	12.6782	-1.2596	0.22619	0.634215	-5.36005
P53990	IST1	PMA	0.17571	14.5834	1.25935	0.226279	0.634215	-5.36034
O75369	FLNB	PMA	0.0894148	13.367	1.25932	0.226289	0.634215	-5.36038
Q92541	RTF1	PMA	-0.123365	12.8408	-1.25886	0.226452	0.634344	-5.36091
Q9BQ52	ELAC2	PMA	-0.346528	14.7807	-1.25761	0.226891	0.634995	-5.36235
Q92882	OSTF1	PMA	-0.164324	16.9416	-1.25754	0.226917	0.634995	-5.36243
P62277	RPS13	PMA	0.170324	16.5041	1.25693	0.22713	0.635022	-5.36313
P08579	SNRPB2	PMA	0.241725	14.3316	1.25654	0.227268	0.635022	-5.36358
P50748	KNTC1	PMA	-0.140432	12.0818	-1.25652	0.227276	0.635022	-5.36361
O14735	CDIPT	PMA	0.212414	15.0282	1.25613	0.227414	0.635046	-5.36406
P0DN76	U2AF1	PMA	0.238295	15.0905	1.25584	0.227517	0.635046	-5.36439
Q15287	RNPS1	PMA	-0.202177	15.1688	-1.25493	0.227836	0.635552	-5.36543
O94903	PLPBP	PMA	-0.0937592	15.0051	-1.25431	0.228057	0.635552	-5.36615
Q9Y3B9	RRP15	PMA	0.238347	13.5095	1.25423	0.228084	0.635552	-5.36624
P52739	ZNF131	PMA	0.361633	14.1758	1.25369	0.228276	0.635552	-5.36686
P20292	ALOX5AP	PMA	0.239921	18.9099	1.25353	0.228334	0.635552	-5.36705
Q5JS37	NHLRC3	PMA	0.176935	12.8647	1.25335	0.228398	0.635552	-5.36726
Q7Z589	EMSY	PMA	-0.329731	11.3195	-1.2522	0.228805	0.63625	-5.36858
Q14653	IRF3	PMA	-0.121839	13.5524	-1.25172	0.228973	0.63625	-5.36912
O60341	KDM1A	PMA	-0.0941789	14.5288	-1.25165	0.228999	0.63625	-5.36921
Q9BU02	THTPA	PMA	-0.17168	11.8915	-1.25019	0.229517	0.637365	-5.37088
P78324	SIRPA	PMA	-0.221759	13.6465	-1.24974	0.229676	0.637482	-5.37139
Q8IYU8	MICU2	PMA	-0.13204	12.8687	-1.24849	0.230122	0.63817	-5.37283
Q9Y4P3	TBL2	PMA	0.269947	11.1855	1.24839	0.230158	0.63817	-5.37295
Q9HAQ2	KIF9	PMA	-0.181149	12.5379	-1.24733	0.230536	0.638895	-5.37416
O15212	PFDN6	PMA	-0.130774	13.8229	-1.24647	0.230843	0.63942	-5.37515
Q14203	DCTN1	PMA	-0.122888	14.7258	-1.24588	0.231055	0.639683	-5.37583
Q8NF64	ZMIZ2	PMA	0.368758	11.7497	1.24498	0.231377	0.640094	-5.37685
Q99933	BAG1	PMA	-0.176356	12.6017	-1.24472	0.231468	0.640094	-5.37715
Q9P2Y5	UVRAG	PMA	-0.253193	11.958	-1.24448	0.231556	0.640094	-5.37743
P53602	MVD	PMA	0.156504	12.1972	1.24388	0.231771	0.640365	-5.37811
Q14165	MLEC	PMA	0.159627	13.1743	1.24316	0.232027	0.640579	-5.37893
O43920	NDUFS5	PMA	-0.16107	13.3841	-1.24274	0.232177	0.640579	-5.37941
Q96KG9	SCYL1	PMA	0.13735	11.8141	1.24268	0.232201	0.640579	-5.37948
Q9P2E2	KIF17	PMA	-0.180145	12.5382	-1.2422	0.232373	0.64073	-5.38003
O43572	AKAP10	PMA	0.198073	12.6677	1.24128	0.232701	0.640976	-5.38107
O43396	TXNL1	PMA	0.1583	14.6898	1.2408	0.232876	0.640976	-5.38163
Q99807	COQ7	PMA	0.192475	11.2864	1.24008	0.233134	0.640976	-5.38244
Q5T5C0	STXBP5	PMA	0.147046	14.2697	1.23957	0.233316	0.640976	-5.38302
Q9HAJ7	SAP30L	PMA	-0.297157	12.2373	-1.23922	0.233442	0.640976	-5.38342
Q9UK61	TASOR	PMA	0.29377	10.2084	1.23921	0.233447	0.640976	-5.38344
P63241	EIF5A	PMA	0.150323	15.2804	1.23898	0.233531	0.640976	-5.3837
P29144	TPP2	PMA	0.0882609	15.5791	1.23881	0.23359	0.640976	-5.38389
Q14147	DHX34	PMA	0.528882	9.95579	1.23878	0.233603	0.640976	-5.38393
Q9Y3R5	DOP1B	PMA	-0.100503	14.6281	-1.23868	0.233638	0.640976	-5.38404
P57053	LOC102724334	PMA	-0.328822	20.8157	-1.23741	0.234098	0.641894	-5.38549
Q92759	GTF2H4	PMA	0.264624	10.4178	1.2371	0.234208	0.641894	-5.38584
Q9BSD7	NTPCR	PMA	-0.244574	12.4134	-1.23657	0.234399	0.642097	-5.38644
Q7Z460	CLASP1	PMA	0.126748	13.5499	1.2361	0.234571	0.642244	-5.38698
Q13077	TRAF1	PMA	-0.293184	12.2242	-1.23545	0.234806	0.642323	-5.38772
Q9BV20	MRI1	PMA	0.121057	13.0776	1.23524	0.23488	0.642323	-5.38795
Q96HE7	ERO1A	PMA	-0.226375	15.4342	-1.23501	0.234964	0.642323	-5.38821
P48739	PITPNB	PMA	-0.0893158	13.5552	-1.23463	0.235103	0.642323	-5.38865
Q12979	ABR	PMA	-0.142255	13.8772	-1.23439	0.235189	0.642323	-5.38892
Q04206	RELA	PMA	-0.119702	13.2671	-1.23324	0.235606	0.643036	-5.39022
P04899	GNAI2	PMA	-0.111265	18.2244	-1.23302	0.235686	0.643036	-5.39047
[truncated: 3,455 more rows]

## Sheet: PMA_AR02
accession	gene_symbol	coef	logFC	AveExpr	t	P.Value	adj.P.Val	B
Q96GX5	MASTL	PMA:AR02	-2.45633	14.5991	-8.40561	3.3007e-07	0.0018002	6.54275
P63279	UBE2I	PMA:AR02	0.752047	17.4097	7.66533	1.07494e-06	0.00293137	5.54753
Q969P6	TOP1MT	PMA:AR02	-4.02108	14.6707	-6.75412	5.07099e-06	0.00921906	4.20257
P35754	GLRX	PMA:AR02	1.02526	19.2639	6.02302	1.91009e-05	0.0225989	3.02448
Q9Y639	NPTN	PMA:AR02	-1.48153	12.4624	-5.95071	2.18648e-05	0.0225989	2.90318
Q7Z406	MYH14	PMA:AR02	-2.31289	17.8987	-5.88234	2.48613e-05	0.0225989	2.78771
P35030	PRSS3	PMA:AR02	1.20845	12.7971	5.58342	4.39118e-05	0.0269097	2.27413
Q9H0V9	LMAN2L	PMA:AR02	0.615969	14.5048	5.43252	5.87805e-05	0.0269097	2.0096
P49641	MAN2A2	PMA:AR02	-0.844245	13.6113	-5.42743	5.93653e-05	0.0269097	2.0006
Q00526	CDK3	PMA:AR02	-3.15969	12.1313	-5.40293	6.22621e-05	0.0269097	1.95731
Q9Y2K2	SIK3	PMA:AR02	1.20551	12.6629	5.39883	6.27604e-05	0.0269097	1.95006
Q70E73	RAPH1	PMA:AR02	-1.26418	13.0763	-5.39862	6.27862e-05	0.0269097	1.94969
Q9NVI1	FANCI	PMA:AR02	-1.39664	14.2954	-5.38766	6.41412e-05	0.0269097	1.93028
Q14050	COL9A3	PMA:AR02	3.68599	12.4057	5.3107	7.45442e-05	0.0280244	1.79352
O95168	NDUFB4	PMA:AR02	0.829456	13.7653	5.29365	7.70749e-05	0.0280244	1.76311
P19338	NCL	PMA:AR02	-0.728264	15.3905	-5.24212	8.52802e-05	0.0290699	1.67093
Q06546	GABPA	PMA:AR02	-1.13777	12.5729	-5.19649	9.32981e-05	0.0299322	1.58898
C9JRZ8	AKR1B15	PMA:AR02	-2.35684	11.8104	-5.15115	0.000102038	0.0309176	1.50725
P68871	HBB	PMA:AR02	-1.77421	15.5281	-5.09748	0.000113483	0.0325756	1.41014
P49662	CASP4	PMA:AR02	-1.03206	13.5857	-5.01112	0.00013475	0.033535	1.25306
O60234	GMFG	PMA:AR02	-1.65101	17.0591	-5.00981	0.000135103	0.033535	1.25067
P51159	RAB27A	PMA:AR02	-1.47172	16.9214	-4.95264	0.000151445	0.033535	1.14614
Q13404	UBE2V1	PMA:AR02	0.539001	16.3637	4.94198	0.000154712	0.033535	1.12659
Q7Z4H8	POGLUT3	PMA:AR02	0.949695	12.6846	4.93308	0.000157492	0.033535	1.11027
Q14696	MESD	PMA:AR02	0.939432	12.6572	4.93268	0.000157621	0.033535	1.10953
Q15907	RAB11B	PMA:AR02	-1.01895	18.0232	-4.92562	0.000159866	0.033535	1.09657
Q96AY2	EME1	PMA:AR02	2.2132	13.7155	4.90124	0.000167876	0.0339109	1.05177
Q9H7P6	MVB12B	PMA:AR02	1.0082	10.6043	4.85385	0.000184646	0.0357989	0.96448
P62888	RPL30	PMA:AR02	0.622755	15.6569	4.83873	0.00019035	0.0357989	0.936574
Q8IVW4	CDKL3	PMA:AR02	-2.40632	13.0506	-4.77766	0.000215298	0.0380506	0.823562
P49321	NASP	PMA:AR02	-0.936778	13.125	-4.77542	0.000216276	0.0380506	0.819401
P01011	SERPINA3	PMA:AR02	-0.875021	13.7911	-4.7333	0.000235508	0.0392742	0.741179
Q9H0Z9	RBM38	PMA:AR02	-2.72565	15.6689	-4.72886	0.000237633	0.0392742	0.732928
Q9Y6A4	CFAP20	PMA:AR02	-0.831318	12.9537	-4.70453	0.000249644	0.0400459	0.687631
P07305	H1-0	PMA:AR02	-1.82855	16.0927	-4.66358	0.000271282	0.041425	0.611246
Q92995	USP13	PMA:AR02	1.4383	10.5866	4.64233	0.000283259	0.041425	0.571534
P61966	AP1S1	PMA:AR02	-1.09137	12.0272	-4.63767	0.000285955	0.041425	0.562823
Q9H3H3	C11orf68	PMA:AR02	0.626737	14.2124	4.63311	0.000288623	0.041425	0.554285
Q9NQC3	RTN4	PMA:AR02	0.890662	18.2761	4.61905	0.000296998	0.041534	0.527983
O43583	DENR	PMA:AR02	-1.53683	13.6354	-4.5734	0.000325968	0.044379	0.442374
Q9ULZ3	PYCARD	PMA:AR02	0.856349	18.602	4.52903	0.000356894	0.044379	0.358971
P49207	RPL34	PMA:AR02	-2.03052	14.2648	-4.52068	0.000363036	0.044379	0.343266
Q9NR28	DIABLO	PMA:AR02	0.545014	13.0323	4.51268	0.000369026	0.044379	0.328204
Q9UJZ1	STOML2	PMA:AR02	0.832412	13.1539	4.50951	0.00037143	0.044379	0.322225
Q8IVV7	GID4	PMA:AR02	1.54535	10.6855	4.50548	0.00037451	0.044379	0.314625
Q8IUC8	GALNT13	PMA:AR02	-1.56377	13.1537	-4.49672	0.000381286	0.044379	0.298118
Q9NZG7	NINJ2	PMA:AR02	1.6451	10.5906	4.48842	0.000387824	0.044379	0.282465
O00268	TAF4	PMA:AR02	0.862623	12.1654	4.48497	0.000390574	0.044379	0.27596
O76003	GLRX3	PMA:AR02	0.537898	14.6928	4.46318	0.00040841	0.0446266	0.234844
Q9H853		PMA:AR02	0.792125	17.6776	4.46129	0.00041	0.0446266	0.231266
O14734	ACOT8	PMA:AR02	0.40923	14.7095	4.45269	0.000417301	0.0446266	0.215012
P68371	TUBB4B	PMA:AR02	2.20777	15.6359	4.43006	0.000437142	0.0447346	0.172231
Q6IS14	EIF5AL1	PMA:AR02	-2.05237	14.3865	-4.42864	0.000438419	0.0447346	0.169543
Q8WXF0	SRSF12	PMA:AR02	-1.0044	12.5922	-4.41504	0.00045084	0.0447346	0.143809
Q13439	GOLGA4	PMA:AR02	-0.851915	12.8433	-4.41129	0.000454325	0.0447346	0.136715
P0C0S5	H2AZ1	PMA:AR02	-1.27443	17.0761	-4.40597	0.000459321	0.0447346	0.126641
Q9C0K0	BCL11B	PMA:AR02	1.07814	11.7907	4.3883	0.000476325	0.0455768	0.0931512
Q5JSZ5	PRRC2B	PMA:AR02	1.00724	12.6745	4.36357	0.000501195	0.0471296	0.0462564
Q8ND24	RNF214	PMA:AR02	0.474412	17.6112	4.34015	0.000525968	0.0486208	0.00179542
Q6UWV6	ENPP7	PMA:AR02	-0.804392	13.4054	-4.28331	0.000591428	0.0521391	-0.106327
Q92630	DYRK2	PMA:AR02	-1.65159	15.3697	-4.28276	0.000592095	0.0521391	-0.107367
P68402	PAFAH1B2	PMA:AR02	0.533334	16.6924	4.27999	0.000595496	0.0521391	-0.112646
O15541	RNF113A	PMA:AR02	-0.975873	10.5793	-4.27452	0.000602267	0.0521391	-0.12307
Q9HD15	SRA1	PMA:AR02	0.642409	13.9991	4.24306	0.000642742	0.0547037	-0.183039
P29558	RBMS1	PMA:AR02	0.917476	11.8363	4.23618	0.000651951	0.0547037	-0.196157
P61457	PCBD1	PMA:AR02	-0.695074	13.5827	-4.21917	0.000675313	0.0558054	-0.228623
Q9NZM1	MYOF	PMA:AR02	-1.12064	11.9464	-4.20621	0.000693679	0.0561572	-0.253367
Q14116	IL18	PMA:AR02	-0.707541	14.7846	-4.20172	0.000700163	0.0561572	-0.261947
Q5T013	HYI	PMA:AR02	0.919269	11.8168	4.18406	0.000726258	0.0562931	-0.295694
P42685	FRK	PMA:AR02	-1.02863	14.9584	-4.18299	0.000727872	0.0562931	-0.297742
Q9HBH5	RDH14	PMA:AR02	-1.0545	12.0389	-4.17673	0.000737385	0.0562931	-0.309717
P49795	RGS19	PMA:AR02	-1.07406	16.0537	-4.17282	0.000743378	0.0562931	-0.317183
P62314	SNRPD1	PMA:AR02	-0.893135	15.5491	-4.16633	0.000753464	0.0562931	-0.329612
O60488	ACSL4	PMA:AR02	0.498497	13.9457	4.152	0.000776185	0.0568201	-0.357014
Q9Y3R5	DOP1B	PMA:AR02	0.476056	14.6281	4.14881	0.000781354	0.0568201	-0.363137
P53675	CLTCL1	PMA:AR02	1.34491	12.6429	4.13105	0.000810696	0.0574478	-0.39714
Q9Y6K0	CEPT1	PMA:AR02	0.586457	14.4734	4.13083	0.000811052	0.0574478	-0.397545
Q9H9H4	VPS37B	PMA:AR02	0.666271	13.9834	4.11471	0.00083868	0.0575682	-0.428443
Q13557	CAMK2D	PMA:AR02	0.707827	15.1717	4.11296	0.00084173	0.0575682	-0.431792
Q68CZ6	HAUS3	PMA:AR02	0.97613	10.2968	4.10398	0.00085758	0.0575682	-0.448999
P15531	NME1	PMA:AR02	0.769042	16.1722	4.09619	0.000871573	0.0575682	-0.46393
P10301	RRAS	PMA:AR02	-1.24583	12.3302	-4.09499	0.000873755	0.0575682	-0.466237
Q5JRA6	MIA3	PMA:AR02	0.581815	14.5564	4.09371	0.000876084	0.0575682	-0.468692
Q14166	TTLL12	PMA:AR02	0.626941	15.3201	4.0835	0.000894875	0.058103	-0.488269
Q15910	EZH2	PMA:AR02	0.677052	16.3207	4.07396	0.000912809	0.0585701	-0.506573
Q96BX8	MOB3A	PMA:AR02	0.503447	15.2238	4.06482	0.000930329	0.058918	-0.524112
Q9ULA0	DNPEP	PMA:AR02	0.523224	14.2767	4.05993	0.000939836	0.058918	-0.533491
Q6YHU6	THADA	PMA:AR02	-1.29353	13.3504	-4.05299	0.000953514	0.0590962	-0.546819
O00241	SIRPB1	PMA:AR02	-0.950052	12.614	-4.04444	0.00097063	0.0594811	-0.563232
P09417	QDPR	PMA:AR02	0.481617	14.8555	4.02616	0.00100829	0.0606263	-0.598344
Q07960	ARHGAP1	PMA:AR02	0.593972	17.0701	4.02461	0.00101155	0.0606263	-0.601326
Q15427	SF3B4	PMA:AR02	0.811684	12.0374	4.01103	0.00104057	0.0616879	-0.627423
P45983	MAPK8	PMA:AR02	0.538219	13.5249	3.99376	0.0010787	0.0632605	-0.660619
Q8TAF3	WDR48	PMA:AR02	0.629615	12.8828	3.97244	0.00112773	0.0640415	-0.701623
P32314	FOXN2	PMA:AR02	2.57036	14.5922	3.97036	0.00113263	0.0640415	-0.705624
Q8N1K5	THEMIS	PMA:AR02	-0.952715	15.4485	-3.96302	0.00115008	0.0640415	-0.719729
P78406	RAE1	PMA:AR02	0.423153	13.458	3.96138	0.00115403	0.0640415	-0.722888
Q8N4P3	HDDC3	PMA:AR02	0.753265	11.0474	3.9569	0.00116486	0.0640415	-0.731511
O00629	KPNA4	PMA:AR02	-0.909505	12.7891	-3.95338	0.00117345	0.0640415	-0.738287
P07902	GALT	PMA:AR02	0.705883	13.471	3.95014	0.00118141	0.0640415	-0.744525
Q6PJT7	ZC3H14	PMA:AR02	0.559316	12.3738	3.9483	0.00118595	0.0640415	-0.748064
Q68D91	MBLAC2	PMA:AR02	1.47783	10.121	3.94265	0.00120002	0.0641658	-0.758941
A8MTJ3	GNAT3	PMA:AR02	-1.44784	19.0591	-3.9356	0.0012178	0.0643364	-0.772511
Q9H008	LHPP	PMA:AR02	-0.908706	14.1816	-3.93125	0.0012289	0.0643364	-0.78088
Q08945	SSRP1	PMA:AR02	0.380842	14.3652	3.92749	0.0012386	0.0643364	-0.788129
Q86XE0	SNX32	PMA:AR02	1.84701	9.62094	3.91558	0.00126977	0.0647504	-0.811058
Q9UHX1	PUF60	PMA:AR02	0.42479	14.1374	3.91342	0.0012755	0.0647504	-0.815211
O14896	IRF6	PMA:AR02	-2.77219	15.1473	-3.91092	0.00128219	0.0647504	-0.820032
Q9Y3C8	UFC1	PMA:AR02	0.505519	15.3514	3.90113	0.00130866	0.0654811	-0.838884
Q9NZN8	CNOT2	PMA:AR02	1.11351	11.1774	3.88295	0.00135932	0.0665621	-0.873918
Q6F5E8	CARMIL2	PMA:AR02	-1.84336	14.1705	-3.88193	0.00136221	0.0665621	-0.875878
Q7Z6J0	SH3RF1	PMA:AR02	-0.985455	11.5133	-3.87795	0.0013736	0.0665621	-0.883554
O60262	GNG7	PMA:AR02	1.02959	12.1267	3.87604	0.00137908	0.0665621	-0.88723
Q5VU43	PDE4DIP	PMA:AR02	0.919477	11.8566	3.86211	0.00141983	0.0670226	-0.914087
Q8WVM7	STAG1	PMA:AR02	-0.616949	13.4053	-3.85221	0.00144952	0.0670226	-0.933176
Q86WN1	FCHSD1	PMA:AR02	1.19961	11.1097	3.84706	0.00146522	0.0670226	-0.943109
Q9Y2H6	FNDC3A	PMA:AR02	0.83316	10.3697	3.84676	0.00146611	0.0670226	-0.94367
Q96HN2	AHCYL2	PMA:AR02	0.550667	14.2754	3.84228	0.00147993	0.0670226	-0.95232
Q9NRH3	TUBG2	PMA:AR02	-1.82584	13.5001	-3.83442	0.00150445	0.0670226	-0.967479
Q96KP1	EXOC2	PMA:AR02	0.592039	15.8914	3.83187	0.0015125	0.0670226	-0.972395
Q96N67	DOCK7	PMA:AR02	-1.32896	13.3914	-3.83051	0.0015168	0.0670226	-0.975015
A0A1B0GUS4		PMA:AR02	0.988547	15.378	3.82909	0.00152132	0.0670226	-0.97776
Q9GZQ3	COMMD5	PMA:AR02	0.783195	14.008	3.8246	0.00153567	0.0670226	-0.986418
P42694	HELZ	PMA:AR02	1.49145	12.9462	3.81657	0.00156166	0.0670226	-1.00189
Q9Y4H4	GPSM3	PMA:AR02	0.709078	16.0044	3.81439	0.00156881	0.0670226	-1.0061
Q5TEU4	NDUFAF5	PMA:AR02	1.58996	12.0144	3.81358	0.00157145	0.0670226	-1.00766
Q8N668	COMMD1	PMA:AR02	0.749925	12.4488	3.81336	0.00157218	0.0670226	-1.00808
Q96DT5	DNAH11	PMA:AR02	2.2818	17.8191	3.81313	0.00157295	0.0670226	-1.00854
Q6NVV1		PMA:AR02	-2.66406	12.7021	-3.80484	0.00160048	0.0674514	-1.02453
P63165	SUMO1	PMA:AR02	-0.976634	14.8455	-3.80267	0.00160775	0.0674514	-1.02872
P50897	PPT1	PMA:AR02	1.19409	10.1898	3.79716	0.00162639	0.0675207	-1.03935
O60942	RNGTT	PMA:AR02	1.27296	10.2013	3.79488	0.00163416	0.0675207	-1.04374
Q9Y2U5	MAP3K2	PMA:AR02	0.60268	13.4278	3.79073	0.00164841	0.0675974	-1.05175
O75629	CREG1	PMA:AR02	1.00203	13.835	3.77823	0.00169209	0.0682666	-1.07586
Q9NWH9	SLTM	PMA:AR02	0.786968	12.2491	3.77158	0.0017158	0.0682666	-1.08869
A8MVS5	C19orf38	PMA:AR02	1.08791	15.1914	3.76469	0.00174072	0.0682666	-1.10198
Q9UJX3	ANAPC7	PMA:AR02	0.608487	12.321	3.7614	0.00175278	0.0682666	-1.10834
P62081	RPS7	PMA:AR02	-1.08806	16.196	-3.75607	0.00177244	0.0682666	-1.11863
Q96NY7	CLIC6	PMA:AR02	3.10424	12.4825	3.75581	0.00177342	0.0682666	-1.11913
Q9H8X2	IPPK	PMA:AR02	-2.04081	18.3368	-3.7556	0.00177417	0.0682666	-1.11953
Q16762	TST	PMA:AR02	0.472445	14.2009	3.75559	0.00177421	0.0682666	-1.11954
Q9Y6M4	CSNK1G3	PMA:AR02	0.604714	12.6317	3.75474	0.00177739	0.0682666	-1.1212
Q92599	SEPTIN8	PMA:AR02	0.632503	16.0566	3.75081	0.00179207	0.0683492	-1.12878
Q8WTR2	DUSP19	PMA:AR02	1.3855	16.1094	3.73282	0.00186086	0.0701573	-1.1635
Q13277	STX3	PMA:AR02	-0.721278	13.4	-3.7317	0.0018652	0.0701573	-1.16565
O94905	ERLIN2	PMA:AR02	0.486018	14.801	3.71621	0.0019267	0.0712672	-1.19555
P62312	LSM6	PMA:AR02	-0.971833	14.3656	-3.71346	0.00193786	0.0712672	-1.20087
O43684	BUB3	PMA:AR02	0.457731	15.1262	3.70921	0.00195517	0.0712672	-1.20907
Q9UHV9	PFDN2	PMA:AR02	-0.643777	14.6913	-3.70584	0.00196903	0.0712672	-1.21558
P57764	GSDMD	PMA:AR02	0.829845	14.933	3.70418	0.00197586	0.0712672	-1.21877
Q13573	SNW1	PMA:AR02	0.540641	13.2986	3.70231	0.00198362	0.0712672	-1.22238
P63218	GNG5	PMA:AR02	1.19432	11.6289	3.7017	0.00198618	0.0712672	-1.22357
P09110	ACAA1	PMA:AR02	0.458746	16.2101	3.69576	0.00201104	0.0715642	-1.23503
Q96Q05	TRAPPC9	PMA:AR02	0.470011	14.5499	3.69347	0.0020207	0.0715642	-1.23945
P22695	UQCRC2	PMA:AR02	0.438359	14.2823	3.68208	0.00206949	0.0728193	-1.26143
Q8NCA5	FAM98A	PMA:AR02	2.33925	13.0238	3.67776	0.00208832	0.0730107	-1.26978
Q9NRV9	HEBP1	PMA:AR02	0.682423	13.7245	3.67183	0.00211444	0.0733361	-1.28123
Q5T1J5		PMA:AR02	1.18589	12.2977	3.66956	0.00212452	0.0733361	-1.28561
Q96BP3	PPWD1	PMA:AR02	0.515989	16.7865	3.6651	0.00214443	0.0735579	-1.29421
Q8N8E3	CEP112	PMA:AR02	1.46055	13.1796	3.65621	0.00218477	0.0739249	-1.31137
Q9Y3L5	RAP2C	PMA:AR02	-0.608404	15.6595	-3.65452	0.00219251	0.0739249	-1.31464
Q9BS40	LXN	PMA:AR02	0.48429	14.8938	3.65142	0.00220679	0.0739249	-1.32061
O60832	DKC1	PMA:AR02	0.359003	14.8548	3.64941	0.00221611	0.0739249	-1.3245
Q13393	PLD1	PMA:AR02	0.57532	13.9226	3.64795	0.0022229	0.0739249	-1.32731
Q16204	CCDC6	PMA:AR02	-1.01008	12.6761	-3.63744	0.00227243	0.074613	-1.34761
Q9HBL8	NMRAL1	PMA:AR02	1.07532	11.3247	3.63534	0.00228242	0.074613	-1.35165
P00450	CP	PMA:AR02	0.769514	11.2165	3.626	0.00232755	0.074613	-1.36969
P02749	APOH	PMA:AR02	-0.770216	13.1949	-3.62536	0.00233068	0.074613	-1.37092
P20292	ALOX5AP	PMA:AR02	-0.980363	18.9099	-3.6219	0.00234761	0.074613	-1.37759
Q86XX4	FRAS1	PMA:AR02	-1.73107	12.4495	-3.6166	0.00237384	0.074613	-1.38782
Q92542	NCSTN	PMA:AR02	-0.455523	13.991	-3.60945	0.00240968	0.074613	-1.40163
Q8NFW8	CMAS	PMA:AR02	0.621585	14.4052	3.60812	0.00241642	0.074613	-1.4042
O75113	N4BP1	PMA:AR02	0.439363	12.9601	3.60155	0.00244993	0.074613	-1.41688
P02771	AFP	PMA:AR02	-1.71098	12.9222	-3.59679	0.00247447	0.074613	-1.42606
Q9NPF4	OSGEP	PMA:AR02	0.501999	13.7004	3.59678	0.00247452	0.074613	-1.42607
Q5T280	SPOUT1	PMA:AR02	1.01854	11.8958	3.5962	0.00247757	0.074613	-1.42721
P20339	RAB5A	PMA:AR02	0.438783	18.9267	3.59199	0.0024995	0.074613	-1.43532
Q13627	DYRK1A	PMA:AR02	0.67288	12.267	3.58939	0.00251317	0.074613	-1.44034
Q6GMV3	PTRHD1	PMA:AR02	0.880065	13.0783	3.58467	0.00253815	0.074613	-1.44945
P49821	NDUFV1	PMA:AR02	-0.423787	13.714	-3.58323	0.00254583	0.074613	-1.45223
Q15120	PDK3	PMA:AR02	0.466471	14.4622	3.58187	0.00255309	0.074613	-1.45485
Q9BR76	CORO1B	PMA:AR02	0.380245	14.7774	3.58181	0.00255342	0.074613	-1.45497
P14406	COX7A2	PMA:AR02	-2.19557	15.2258	-3.57922	0.0025673	0.074613	-1.45996
Q9H0U3	MAGT1	PMA:AR02	-0.588231	14.3669	-3.57862	0.00257052	0.074613	-1.46112
Q15833	STXBP2	PMA:AR02	0.397055	16.4823	3.57502	0.00259002	0.074613	-1.46808
Q9ULV0	MYO5B	PMA:AR02	1.15507	13.4692	3.57304	0.00260076	0.074613	-1.47188
I3L3R5	CCER2	PMA:AR02	1.64801	12.039	3.57257	0.00260333	0.074613	-1.47279
Q86TV6	TTC7B	PMA:AR02	0.938683	11.663	3.57131	0.00261025	0.074613	-1.47524
Q5HYK3	COQ5	PMA:AR02	1.55854	9.9639	3.56424	0.00264918	0.074613	-1.48886
P08237	PFKM	PMA:AR02	0.528067	14.227	3.56311	0.0026555	0.074613	-1.49106
Q8N3F8	MICALL1	PMA:AR02	0.585071	12.1476	3.56298	0.00265623	0.074613	-1.49131
Q96AY4	TTC28	PMA:AR02	1.07978	16.2354	3.55961	0.00267504	0.074613	-1.4978
P56377	AP1S2	PMA:AR02	-0.654038	15.4707	-3.55858	0.00268081	0.074613	-1.49979
P62273	RPS29	PMA:AR02	-1.49244	13.3216	-3.55812	0.0026834	0.074613	-1.50068
Q9NP97	DYNLRB1	PMA:AR02	1.57461	12.1916	3.55534	0.00269908	0.074613	-1.50604
P34949	MPI	PMA:AR02	0.461876	14.5659	3.55433	0.00270481	0.074613	-1.50799
Q15418	RPS6KA1	PMA:AR02	0.497663	14.9777	3.55233	0.00271615	0.074613	-1.51184
Q5T1R4	HIVEP3	PMA:AR02	-3.60383	14.7839	-3.55122	0.00272252	0.074613	-1.514
P17612	PRKACA	PMA:AR02	-0.555211	15.345	-3.5491	0.0027346	0.074613	-1.51807
P26196	DDX6	PMA:AR02	0.422939	16.0702	3.54684	0.0027476	0.074613	-1.52244
Q13435	SF3B2	PMA:AR02	0.385188	15.3708	3.54052	0.00278423	0.074613	-1.53462
Q9UL26	RAB22A	PMA:AR02	-1.34293	13.4022	-3.53877	0.00279449	0.074613	-1.53801
P31751	AKT2	PMA:AR02	-0.716794	11.9748	-3.53853	0.0027959	0.074613	-1.53847
Q9NZB2	FAM120A	PMA:AR02	0.434937	14.4509	3.53817	0.00279797	0.074613	-1.53915
Q92945	KHSRP	PMA:AR02	0.456912	15.6533	3.53554	0.00281345	0.074613	-1.54423
Q5VW32	BROX	PMA:AR02	0.486152	14.8585	3.53016	0.00284536	0.074613	-1.55461
P0CG22		PMA:AR02	-1.03419	13.1804	-3.52926	0.00285075	0.074613	-1.55635
Q9NVF7	FBXO28	PMA:AR02	1.19853	12.0934	3.52655	0.00286699	0.074613	-1.56158
Q96JB5	CDK5RAP3	PMA:AR02	-0.690599	12.4193	-3.52593	0.00287072	0.074613	-1.56277
P00390	GSR	PMA:AR02	0.472757	18.2029	3.52557	0.00287289	0.074613	-1.56347
Q9Y4P1	ATG4B	PMA:AR02	0.578428	13.7013	3.51612	0.00293032	0.075744	-1.58168
P30613	PKLR	PMA:AR02	-0.758977	18.3386	-3.51246	0.00295289	0.0759673	-1.58874
O75521	ECI2	PMA:AR02	0.735948	11.0097	3.5055	0.00299628	0.0767217	-1.60215
Q9Y584	TIMM22	PMA:AR02	0.593394	11.8317	3.50236	0.00301609	0.0767237	-1.60822
Q9NVZ3	NECAP2	PMA:AR02	-0.478438	14.0727	-3.50103	0.00302449	0.0767237	-1.61077
Q96PV6	LENG8	PMA:AR02	0.944191	10.5531	3.4976	0.00304635	0.0767603	-1.6174
Q6GTX8	LAIR1	PMA:AR02	-0.607818	14.2999	-3.49509	0.00306237	0.0767603	-1.62222
Q9Y5R8	TRAPPC1	PMA:AR02	0.478773	13.6421	3.49419	0.00306816	0.0767603	-1.62396
Q99447	PCYT2	PMA:AR02	0.503217	13.1826	3.49044	0.00309239	0.0769005	-1.63119
P04920	SLC4A2	PMA:AR02	0.53859	12.7331	3.48894	0.00310209	0.0769005	-1.63407
A0AV96	RBM47	PMA:AR02	0.554156	13.021	3.4868	0.00311606	0.0769005	-1.63821
Q9HBI0	PARVG	PMA:AR02	-0.603431	15.1642	-3.47025	0.00322603	0.0792535	-1.6701
P00491	PNP	PMA:AR02	0.384789	19.0129	3.46637	0.00325236	0.0792535	-1.67757
Q562R1	ACTBL2	PMA:AR02	1.35495	16.5625	3.46598	0.003255	0.0792535	-1.67832
P06493	CDK1	PMA:AR02	0.877061	11.5826	3.4602	0.00329468	0.0796952	-1.68946
Q9GZM8	NDEL1	PMA:AR02	0.695398	11.9176	3.45543	0.00332777	0.0796952	-1.69864
Q9Y5U9	IER3IP1	PMA:AR02	-0.879625	15.803	-3.45412	0.00333696	0.0796952	-1.70118
Q9HA64	FN3KRP	PMA:AR02	0.840088	14.2388	3.4537	0.00333989	0.0796952	-1.70198
Q9C0B7	TANGO6	PMA:AR02	1.4395	10.1427	3.4512	0.00335739	0.0796952	-1.70679
Q99627	COPS8	PMA:AR02	0.72657	13.8243	3.44844	0.0033769	0.0796952	-1.71211
Q9NPA8	ENY2	PMA:AR02	-1.0274	12.324	-3.44741	0.00338417	0.0796952	-1.71409
P25787	PSMA2	PMA:AR02	1.16876	15.214	3.44659	0.00339004	0.0796952	-1.71568
P49459	UBE2A	PMA:AR02	-0.694716	12.5099	-3.43611	0.0034653	0.0807953	-1.73587
Q9NXN4	GDAP2	PMA:AR02	0.388198	13.8287	3.43595	0.00346646	0.0807953	-1.73617
P01857		PMA:AR02	0.997657	16.0012	3.42883	0.00351856	0.0816606	-1.74988
Q13367	AP3B2	PMA:AR02	0.475089	13.5436	3.4246	0.00354988	0.0820384	-1.75802
P55327	TPD52	PMA:AR02	0.539642	13.2437	3.42183	0.00357047	0.0821661	-1.76334
Q14444	CAPRIN1	PMA:AR02	-0.615169	12.967	-3.41373	0.00363159	0.0831351	-1.77893
Q06481	APLP2	PMA:AR02	-0.822352	11.1999	-3.41223	0.00364307	0.0831351	-1.78183
Q9NZL9	MAT2B	PMA:AR02	0.404881	16.3807	3.40734	0.00368052	0.0836399	-1.79123
P05386	RPLP1	PMA:AR02	1.39938	15.0205	3.40422	0.00370466	0.0838391	-1.79723
Q8IWZ3	ANKHD1	PMA:AR02	0.456748	16.3641	3.39641	0.00376579	0.0845865	-1.81227
Q6UWP2	DHRS11	PMA:AR02	1.10853	10.882	3.39168	0.00380323	0.0845865	-1.82135
Q9Y2T2	AP3M1	PMA:AR02	0.553287	13.4968	3.39048	0.00381284	0.0845865	-1.82367
Q96FJ0	STAMBPL1	PMA:AR02	-1.07188	11.9978	-3.39012	0.00381567	0.0845865	-1.82435
O43236	SEPTIN4	PMA:AR02	0.677394	13.9308	3.38804	0.00383236	0.0845865	-1.82836
Q9H7N4	SCAF1	PMA:AR02	1.0104	9.25051	3.38726	0.0038386	0.0845865	-1.82985
P20138	CD33	PMA:AR02	1.33328	12.8635	3.38203	0.00388088	0.0845865	-1.83991
Q96QG7	MTMR9	PMA:AR02	0.54302	12.7493	3.38159	0.00388449	0.0845865	-1.84076
Q9UK45	LSM7	PMA:AR02	-1.24804	14.5414	-3.37871	0.00390795	0.0845865	-1.84629
O15265	ATXN7	PMA:AR02	-1.13888	11.1841	-3.37691	0.00392277	0.0845865	-1.84977
O95674	CDS2	PMA:AR02	0.896447	13.2515	3.37617	0.00392878	0.0845865	-1.85118
Q14005	IL16	PMA:AR02	0.443126	17.002	3.37532	0.0039358	0.0845865	-1.85281
Q96J02	ITCH	PMA:AR02	0.505493	12.0118	3.37405	0.00394631	0.0845865	-1.85526
P06703	S100A6	PMA:AR02	-0.483582	18.614	-3.37302	0.00395481	0.0845865	-1.85724
P09669	COX6C	PMA:AR02	-2.02004	14.4003	-3.36787	0.00399769	0.0848992	-1.86714
P51817	PRKX	PMA:AR02	-1.9606	13.7744	-3.36621	0.00401157	0.0848992	-1.87032
Q8TF68	ZNF384	PMA:AR02	0.862499	11.973	3.36567	0.00401613	0.0848992	-1.87136
C9JLW8	MCRIP1	PMA:AR02	0.81724	11.3607	3.35947	0.00406863	0.0852241	-1.88329
Q5VYK3		PMA:AR02	0.306675	14.7189	3.35895	0.00407305	0.0852241	-1.88428
Q96II8	LRCH3	PMA:AR02	0.840913	10.1838	3.35832	0.00407838	0.0852241	-1.88548
O60341	KDM1A	PMA:AR02	0.356883	14.5288	3.35382	0.00411701	0.085703	-1.89414
Q7Z6J8	UBE3D	PMA:AR02	-0.620502	13.7566	-3.3477	0.00417006	0.0860596	-1.90589
P60983	GMFB	PMA:AR02	-1.27772	13.2824	-3.3471	0.00417533	0.0860596	-1.90705
P04040	CAT	PMA:AR02	0.375125	19.8468	3.34598	0.00418515	0.0860596	-1.9092
Q96G01	BICD1	PMA:AR02	-1.07631	11.7029	-3.34408	0.00420183	0.0860596	-1.91285
Q92625	ANKS1A	PMA:AR02	0.771412	11.2079	3.3428	0.00421304	0.0860596	-1.9153
Q9UL42	PNMA2	PMA:AR02	-2.51443	12.5897	-3.33825	0.00425335	0.0865589	-1.92403
O43396	TXNL1	PMA:AR02	-0.601783	14.6898	-3.33539	0.00427897	0.0867564	-1.92954
Q7Z739	YTHDF3	PMA:AR02	0.689828	12.9093	3.33077	0.00432052	0.0872746	-1.93841
P50995	ANXA11	PMA:AR02	-0.515975	18.1048	-3.32533	0.00436992	0.0876141	-1.94884
P08246	ELANE	PMA:AR02	1.07929	18.9004	3.32417	0.00438057	0.0876141	-1.95107
P36542	ATP5F1C	PMA:AR02	0.529789	16.6122	3.32363	0.00438552	0.0876141	-1.95211
Q32NB8	PGS1	PMA:AR02	0.784869	10.8847	3.32054	0.00441401	0.0878484	-1.95805
Q6P2E9	EDC4	PMA:AR02	0.367316	15.7195	3.31887	0.00442947	0.0878484	-1.96126
Q6AWC2	WWC2	PMA:AR02	2.61975	14.0303	3.31508	0.00446472	0.0882268	-1.96853
Q9BWU0	SLC4A1AP	PMA:AR02	0.510679	12.7679	3.31203	0.00449326	0.0884701	-1.97437
O00189	AP4M1	PMA:AR02	0.848632	11.8731	3.3098	0.00451432	0.0885651	-1.97866
Q09028	RBBP4	PMA:AR02	-0.445917	14.6809	-3.30352	0.004574	0.0894143	-1.9907
Q9UL18	AGO1	PMA:AR02	0.429569	12.8273	3.29807	0.00462644	0.0901164	-2.00116
Q9UBV8	PEF1	PMA:AR02	-0.556733	14.0955	-3.29482	0.00465796	0.0904076	-2.00738
P53814	SMTN	PMA:AR02	1.0469	10.3008	3.28251	0.00477944	0.0923893	-2.03099
Q3SXM5	HSDL1	PMA:AR02	-0.909283	10.4929	-3.28106	0.00479394	0.0923893	-2.03376
Q5JTV8	TOR1AIP1	PMA:AR02	0.500246	16.6057	3.27483	0.00485672	0.0932696	-2.04569
Q96JH7	VCPIP1	PMA:AR02	0.486542	13.8182	3.26656	0.00494145	0.0934457	-2.06154
Q68EM7	ARHGAP17	PMA:AR02	0.432672	13.5971	3.26642	0.00494289	0.0934457	-2.06181
P0DOX7		PMA:AR02	0.86745	13.5384	3.26636	0.00494347	0.0934457	-2.06191
Q9Y2E4	DIP2C	PMA:AR02	0.84015	13.1614	3.26624	0.00494474	0.0934457	-2.06215
P00846	ATP6	PMA:AR02	0.704433	14.7243	3.26558	0.00495156	0.0934457	-2.06341
Q9BXS5	AP1M1	PMA:AR02	0.478231	16.1997	3.26117	0.00499746	0.0936852	-2.07187
P25786	PSMA1	PMA:AR02	-0.356447	15.7199	-3.26106	0.00499861	0.0936852	-2.07208
O60828	PQBP1	PMA:AR02	0.455707	15.6076	3.25907	0.0050194	0.0937528	-2.07588
Q9Y259	CHKB	PMA:AR02	0.539316	13.2315	3.25107	0.00510402	0.095008	-2.0912
B5ME19	EIF3CL	PMA:AR02	0.364099	15.999	3.23733	0.00525263	0.0974417	-2.11749
Q6UWD8	C16orf54	PMA:AR02	0.866038	11.6932	3.23562	0.00527141	0.0974585	-2.12075
Q9BSR8	YIPF4	PMA:AR02	0.917395	12.3104	3.23333	0.00529669	0.0975951	-2.12514
Q8NF91	SYNE1	PMA:AR02	0.39207	15.2173	3.23082	0.00532456	0.0977782	-2.12994
P00568	AK1	PMA:AR02	-0.93335	12.5883	-3.22549	0.00538418	0.0979787	-2.14014
Q96KQ4	PPP1R13B	PMA:AR02	1.08641	14.6563	3.22484	0.00539151	0.0979787	-2.14138
Q9H2G2	SLK	PMA:AR02	0.39411	16.1202	3.22373	0.00540402	0.0979787	-2.1435
Q12996	CSTF3	PMA:AR02	0.48715	13.7122	3.22343	0.00540733	0.0979787	-2.14407
P52815	MRPL12	PMA:AR02	0.585579	13.136	3.21488	0.00550483	0.0989182	-2.16043
Q9NRW1	RAB6B	PMA:AR02	-1.43812	14.0863	-3.21403	0.00551456	0.0989182	-2.16204
Q9NSV4	DIAPH3	PMA:AR02	1.41424	13.0734	3.20958	0.00556602	0.0989182	-2.17054
P20839	IMPDH1	PMA:AR02	0.401232	15.3246	3.20876	0.00557555	0.0989182	-2.17211
Q8NB37	GATD1	PMA:AR02	0.675045	13.861	3.20823	0.00558173	0.0989182	-2.17312
Q5QJ74	TBCEL	PMA:AR02	0.868063	11.393	3.20727	0.00559299	0.0989182	-2.17497
O94913	PCF11	PMA:AR02	0.827186	17.827	3.20498	0.00561968	0.0989182	-2.17932
P08311	CTSG	PMA:AR02	-0.617843	20.8994	-3.20412	0.00562987	0.0989182	-2.18098
Q92598	HSPH1	PMA:AR02	0.389523	17.6859	3.20353	0.00563679	0.0989182	-2.18211
Q02241	KIF23	PMA:AR02	-0.829674	15.6709	-3.20321	0.00564055	0.0989182	-2.18272
O60603	TLR2	PMA:AR02	0.445345	14.4041	3.19849	0.00569638	0.099577	-2.19173
O43865	AHCYL1	PMA:AR02	-0.602212	12.3848	-3.19212	0.00577263	0.100379	-2.2039
Q08752	PPID	PMA:AR02	-0.515243	13.6919	-3.19025	0.00579515	0.100379	-2.20746
O94886	TMEM63A	PMA:AR02	0.360369	15.477	3.18856	0.00581566	0.100379	-2.21069
Q8TBC3	SHKBP1	PMA:AR02	0.485595	13.0402	3.18854	0.0058159	0.100379	-2.21073
P35813	PPM1A	PMA:AR02	0.367789	14.5005	3.1853	0.0058553	0.100431	-2.21691
Q92747	ARPC1A	PMA:AR02	0.431983	14.0138	3.18527	0.0058557	0.100431	-2.21697
Q53GL7	PARP10	PMA:AR02	0.515103	13.1804	3.18195	0.00589636	0.100811	-2.2233
Q14511	NEDD9	PMA:AR02	0.438412	13.4885	3.1794	0.00592779	0.101032	-2.22816
P35658	NUP214	PMA:AR02	0.456155	13.3279	3.17542	0.0059772	0.101557	-2.23575
P04181	OAT	PMA:AR02	0.433693	16.623	3.16663	0.00608783	0.102425	-2.25253
Q9HB71	CACYBP	PMA:AR02	-0.463913	14.7884	-3.16632	0.00609178	0.102425	-2.25312
O14802	POLR3A	PMA:AR02	-2.4528	18.3384	-3.16421	0.00611865	0.102425	-2.25714
P98088	MUC5AC	PMA:AR02	1.38177	17.1921	3.1636	0.00612632	0.102425	-2.25829
Q8IYB5	SMAP1	PMA:AR02	-1.3452	11.0902	-3.16148	0.00615357	0.102425	-2.26235
O00264	PGRMC1	PMA:AR02	-0.551245	13.8117	-3.16123	0.00615674	0.102425	-2.26282
O14561	NDUFAB1	PMA:AR02	1.02187	12.3744	3.16099	0.00615975	0.102425	-2.26326
O00267	SUPT5H	PMA:AR02	0.379776	12.8945	3.15109	0.00628826	0.103693	-2.28214
Q9BRR6	ADPGK	PMA:AR02	0.380849	15.1414	3.15091	0.0062906	0.103693	-2.28248
P50993	ATP1A2	PMA:AR02	0.730031	12.595	3.14934	0.0063112	0.103693	-2.28547
Q15370	ELOB	PMA:AR02	0.353917	15.2347	3.14927	0.00631207	0.103693	-2.28559
P68363	TUBA1B	PMA:AR02	0.59346	18.9615	3.1434	0.0063898	0.104376	-2.29678
Q92574	TSC1	PMA:AR02	0.64204	11.9124	3.14282	0.00639757	0.104376	-2.29789
Q6UW68	TMEM205	PMA:AR02	0.513819	14.1198	3.1418	0.00641109	0.104376	-2.29982
O15228	GNPAT	PMA:AR02	0.564522	12.6837	3.13055	0.00656318	0.106534	-2.32124
P52790	HK3	PMA:AR02	-1.41929	12.1177	-3.12719	0.0066093	0.106923	-2.32764
P09496	CLTA	PMA:AR02	-0.435287	14.4046	-3.12595	0.00662635	0.106923	-2.32999
O95400	CD2BP2	PMA:AR02	0.631191	12.4315	3.12371	0.00665737	0.107107	-2.33426
Q9NY65	TUBA8	PMA:AR02	-0.705084	17.2809	-3.11969	0.00671337	0.107469	-2.34191
Q9NR50	EIF2B3	PMA:AR02	0.492556	12.395	3.11926	0.00671929	0.107469	-2.34272
Q13107	USP4	PMA:AR02	0.426616	14.6071	3.11425	0.00678972	0.108278	-2.35224
Q5J8M3	EMC4	PMA:AR02	0.824683	10.956	3.11223	0.0068184	0.108419	-2.35609
Q70EL1	USP54	PMA:AR02	1.38438	11.5187	3.1068	0.0068959	0.109264	-2.36641
Q9UNZ2	NSFL1C	PMA:AR02	0.391412	15.0295	3.1057	0.00691162	0.109264	-2.36849
P57721	PCBP3	PMA:AR02	0.458903	16.7534	3.09971	0.00699838	0.11014	-2.37988
Q14761	PTPRCAP	PMA:AR02	-1.19721	13.1631	-3.09909	0.00700744	0.11014	-2.38106
Q96FS4	SIPA1	PMA:AR02	0.34402	16.0624	3.09443	0.00707568	0.110398	-2.3899
Q04759	PRKCQ	PMA:AR02	-1.06197	16.0947	-3.09401	0.00708179	0.110398	-2.39069
Q7Z401	DENND4A	PMA:AR02	0.489404	12.1934	3.09337	0.00709125	0.110398	-2.39191
Q8TEA8	DTD1	PMA:AR02	-1.12074	11.4096	-3.09245	0.00710479	0.110398	-2.39365
Q9BSH4	TACO1	PMA:AR02	0.794465	10.7212	3.08694	0.0071867	0.111297	-2.40411
Q9NUW8	TDP1	PMA:AR02	0.658201	11.3686	3.08526	0.00721198	0.111297	-2.40732
Q9H0A8	COMMD4	PMA:AR02	-0.819868	13.7059	-3.08446	0.00722388	0.111297	-2.40882
Q5VWQ0	RSBN1	PMA:AR02	0.68135	11.6252	3.08011	0.00728959	0.11168	-2.41709
Q9C0I1	MTMR12	PMA:AR02	0.803999	10.0996	3.0801	0.00728973	0.11168	-2.4171
Q8NFZ5	TNIP2	PMA:AR02	0.924359	11.1283	3.07734	0.00733168	0.11178	-2.42234
Q96CP6	GRAMD1A	PMA:AR02	0.44931	14.533	3.07697	0.00733726	0.11178	-2.42303
P11766	ADH5	PMA:AR02	-0.521525	16.1015	-3.07534	0.00736215	0.111845	-2.42612
O00453	LST1	PMA:AR02	0.659538	15.7964	3.07028	0.00744002	0.111845	-2.43572
Q13952	NFYC	PMA:AR02	-0.532629	13.3988	-3.06834	0.00747009	0.111845	-2.4394
Q9UFG5	C19orf25	PMA:AR02	2.04118	14.4582	3.06712	0.00748915	0.111845	-2.44172
Q96QH2	PRAM1	PMA:AR02	0.534793	15.9259	3.0652	0.00751895	0.111845	-2.44535
Q9BZE4	GTPBP4	PMA:AR02	0.457638	12.7363	3.06398	0.00753809	0.111845	-2.44766
Q96IU4	ABHD14B	PMA:AR02	0.811284	15.4654	3.06178	0.00757265	0.111845	-2.45184
Q9UJW0	DCTN4	PMA:AR02	0.42529	13.4975	3.0607	0.00758959	0.111845	-2.45387
P08754	GNAI3	PMA:AR02	-0.736467	15.9875	-3.05923	0.0076128	0.111845	-2.45666
P08865	RPSA	PMA:AR02	0.521987	15.9651	3.05643	0.00765729	0.111845	-2.46197
Q14004	CDK13	PMA:AR02	0.905311	12.1791	3.05451	0.00768796	0.111845	-2.46562
Q6UXV4	APOOL	PMA:AR02	0.479509	12.3949	3.05445	0.00768885	0.111845	-2.46572
Q96HR3	MED30	PMA:AR02	0.507276	11.2912	3.05381	0.00769915	0.111845	-2.46694
P22059	OSBP	PMA:AR02	0.480703	13.771	3.05329	0.00770737	0.111845	-2.46792
Q9H061	TMEM126A	PMA:AR02	-0.711089	12.5095	-3.05322	0.00770854	0.111845	-2.46805
Q6NZY4	ZCCHC8	PMA:AR02	0.565309	12.1514	3.05116	0.00774158	0.111845	-2.47195
Q9GZN8	ADISSP	PMA:AR02	0.456394	14.9924	3.05079	0.00774748	0.111845	-2.47265
Q9NR12	PDLIM7	PMA:AR02	0.652156	16.2038	3.0503	0.00775546	0.111845	-2.47359
Q9Y383	LUC7L2	PMA:AR02	0.34978	14.7152	3.04893	0.00777744	0.111845	-2.47617
P25788	PSMA3	PMA:AR02	-0.616979	15.4567	-3.04798	0.00779289	0.111845	-2.47798
Q6Y7W6	GIGYF2	PMA:AR02	0.517061	12.265	3.04795	0.00779335	0.111845	-2.47803
P50750	CDK9	PMA:AR02	-0.680125	18.0067	-3.04661	0.00781507	0.111845	-2.48057
O94910	ADGRL1	PMA:AR02	1.50296	11.7212	3.04577	0.00782867	0.111845	-2.48215
P26368	U2AF2	PMA:AR02	0.375934	16.5621	3.04493	0.00784238	0.111845	-2.48375
Q9HB90	RRAGC	PMA:AR02	0.369695	15.0985	3.04421	0.00785414	0.111845	-2.48511
Q04206	RELA	PMA:AR02	0.417263	13.2671	3.03976	0.00792695	0.112329	-2.49352
P0C025	NUDT17	PMA:AR02	-0.758216	11.1942	-3.03962	0.00792932	0.112329	-2.4938
Q96BI1	SLC22A18	PMA:AR02	0.81336	12.1248	3.03761	0.00796244	0.112506	-2.4976
P0CG04		PMA:AR02	1.43152	12.693	3.0324	0.00804911	0.113	-2.50746
Q8N884	CGAS	PMA:AR02	0.671572	12.3364	3.03083	0.0080753	0.113	-2.51042
Q8IZQ5	SELENOH	PMA:AR02	-0.939536	13.3463	-3.03047	0.00808132	0.113	-2.5111
P20160	AZU1	PMA:AR02	-1.06379	21.1707	-3.02977	0.00809312	0.113	-2.51243
P31323	PRKAR2B	PMA:AR02	0.504521	13.5328	3.0293	0.00810102	0.113	-2.51332
Q53HV7	SMUG1	PMA:AR02	1.29296	9.72212	3.02274	0.00821207	0.114257	-2.52572
Q92882	OSTF1	PMA:AR02	0.557807	16.9416	3.01847	0.00828503	0.114979	-2.53378
P21283	ATP6V1C1	PMA:AR02	-0.404012	14.8172	-3.01077	0.00841847	0.116083	-2.54833
O95861	BPNT1	PMA:AR02	0.366975	13.8776	3.00909	0.00844789	0.116083	-2.55151
Q9H4G4	GLIPR2	PMA:AR02	0.563517	16.3836	3.00777	0.00847092	0.116083	-2.55399
Q9HCG8	CWC22	PMA:AR02	0.621779	12.3968	3.00705	0.0084836	0.116083	-2.55535
O94903	PLPBP	PMA:AR02	0.317773	15.0051	3.00603	0.00850164	0.116083	-2.55728
Q6ZWT7	MBOAT2	PMA:AR02	0.464659	14.0906	3.0058	0.00850561	0.116083	-2.55771
Q9UQC2	GAB2	PMA:AR02	-0.936701	11.2581	-3.00507	0.00851855	0.116083	-2.55909
Q7Z6Z7	HUWE1	PMA:AR02	0.306512	14.7476	3.00414	0.0085349	0.116083	-2.56084
P35613	BSG	PMA:AR02	-0.921719	14.8832	-3.00098	0.00859105	0.116468	-2.56681
Q9NR19	ACSS2	PMA:AR02	0.478593	13.4068	3.00015	0.00860591	0.116468	-2.56838
P30153	PPP2R1A	PMA:AR02	0.315462	16.6672	2.99812	0.00864219	0.116552	-2.57221
Q9NW64	RBM22	PMA:AR02	0.503933	12.1059	2.99432	0.00871039	0.116552	-2.57937
Q99436	PSMB7	PMA:AR02	-0.625906	11.9434	-2.99279	0.0087382	0.116552	-2.58227
P21912	SDHB	PMA:AR02	0.461631	14.7335	2.99196	0.00875323	0.116552	-2.58383
P48736	PIK3CG	PMA:AR02	0.45343	13.1066	2.9916	0.00875974	0.116552	-2.58451
Q8TAQ5	ZNF420	PMA:AR02	0.468087	16.7845	2.98966	0.00879492	0.116552	-2.58815
P27448	MARK3	PMA:AR02	0.371754	13.524	2.98946	0.00879858	0.116552	-2.58853
Q9UGI8	TES	PMA:AR02	0.432045	14.9911	2.98939	0.00879982	0.116552	-2.58866
Q9H792	PEAK1	PMA:AR02	1.48358	12.6399	2.98914	0.00880443	0.116552	-2.58914
P13984	GTF2F2	PMA:AR02	0.340919	13.5952	2.98693	0.00884487	0.11664	-2.59331
Q9NRL2	BAZ1A	PMA:AR02	0.529496	13.772	2.98644	0.00885384	0.11664	-2.59423
Q969H8	MYDGF	PMA:AR02	0.462214	15.8086	2.9821	0.00893378	0.116898	-2.60241
Q13148	TARDBP	PMA:AR02	0.546358	14.6429	2.98202	0.00893534	0.116898	-2.60257
Q9BQA9	CYBC1	PMA:AR02	0.710135	13.0837	2.98125	0.00894961	0.116898	-2.60402
O60244	MED14	PMA:AR02	0.574959	11.7023	2.98073	0.00895921	0.116898	-2.605
Q07820	MCL1	PMA:AR02	0.628673	12.1616	2.97541	0.00905833	0.117497	-2.61501
Q6PJG2	MIDEAS	PMA:AR02	0.574042	13.8454	2.97448	0.00907578	0.117497	-2.61676
Q96M96	FGD4	PMA:AR02	0.429214	17.4049	2.97435	0.00907829	0.117497	-2.61701
P36873	PPP1CC	PMA:AR02	0.383027	16.7601	2.97352	0.00909396	0.117497	-2.61858
P84077	ARF1	PMA:AR02	-1.01481	15.2752	-2.97095	0.00914247	0.117497	-2.62342
O95295	SNAPIN	PMA:AR02	0.581229	14.076	2.9703	0.00915474	0.117497	-2.62464
Q08043	ACTN3	PMA:AR02	-0.363638	17.8678	-2.97024	0.00915593	0.117497	-2.62475
Q2TB90	HKDC1	PMA:AR02	-1.67029	15.1143	-2.96516	0.00925262	0.118268	-2.63431
Q9NQA3		PMA:AR02	0.74562	12.509	2.96353	0.00928398	0.118268	-2.63738
P35475	IDUA	PMA:AR02	-0.85457	11.0599	-2.9633	0.00928835	0.118268	-2.63781
P49336	CDK8	PMA:AR02	-0.861135	12.361	-2.96192	0.00931491	0.118268	-2.64041
O15372	EIF3H	PMA:AR02	0.472434	14.144	2.96117	0.00932927	0.118268	-2.64181
P40763	STAT3	PMA:AR02	0.38079	15.0471	2.95958	0.00936014	0.118268	-2.64481
P28072	PSMB6	PMA:AR02	-0.364632	14.7599	-2.95871	0.00937702	0.118268	-2.64645
Q9Y3L3	SH3BP1	PMA:AR02	-0.644701	13.0812	-2.95699	0.00941044	0.118268	-2.64968
A6NIH7	UNC119B	PMA:AR02	0.544348	14.7491	2.95437	0.0094616	0.118268	-2.65461
Q9Y2L5	TRAPPC8	PMA:AR02	0.295683	14.8109	2.95383	0.00947205	0.118268	-2.65562
Q7L8L6	FASTKD5	PMA:AR02	1.02651	11.893	2.95291	0.00949019	0.118268	-2.65736
O43808	SLC25A17	PMA:AR02	1.33014	11.2071	2.95175	0.00951299	0.118268	-2.65954
O95210	STBD1	PMA:AR02	0.603091	15.9159	2.94972	0.00955294	0.118268	-2.66335
O00186	STXBP3	PMA:AR02	0.425076	14.5155	2.94926	0.00956204	0.118268	-2.66421
Q9H6Q3	SLA2	PMA:AR02	0.835594	9.79856	2.94835	0.00957999	0.118268	-2.66592
Q9UL25	RAB21	PMA:AR02	0.512461	17.0967	2.94806	0.00958579	0.118268	-2.66647
P13725	OSM	PMA:AR02	1.49035	12.915	2.94742	0.00959852	0.118268	-2.66767
Q9BQE3	TUBA1C	PMA:AR02	1.06154	12.3205	2.94591	0.00962853	0.118268	-2.67051
Q15904	ATP6AP1	PMA:AR02	-0.33789	14.9617	-2.94486	0.00964943	0.118268	-2.67248
Q01130	SRSF2	PMA:AR02	-1.66795	15.6831	-2.94305	0.00968553	0.118268	-2.67587
P23743	DGKA	PMA:AR02	0.308192	15.2372	2.94289	0.00968871	0.118268	-2.67617
Q6P2P2	PRMT9	PMA:AR02	0.824729	10.1706	2.94268	0.00969305	0.118268	-2.67658
Q4G0J3	LARP7	PMA:AR02	0.465101	13.2684	2.94133	0.00972011	0.118334	-2.67911
O75427	LRCH4	PMA:AR02	0.460571	13.9732	2.93908	0.0097653	0.118619	-2.68333
Q9NR46	SH3GLB2	PMA:AR02	0.337941	14.0346	2.93477	0.00985277	0.119074	-2.69143
Q86YT6	MIB1	PMA:AR02	-0.724806	11.3662	-2.93413	0.00986571	0.119074	-2.69262
Q9BQF6	SENP7	PMA:AR02	0.666386	11.734	2.93401	0.00986823	0.119074	-2.69285
A8MXV4	NUDT19	PMA:AR02	0.711765	13.3861	2.93262	0.00989668	0.119153	-2.69547
P11387	TOP1	PMA:AR02	-0.571882	14.2275	-2.92214	0.0101131	0.1212	-2.71512
P05107	ITGB2	PMA:AR02	0.418078	19.2623	2.92126	0.0101315	0.1212	-2.71677
Q9Y5S8	NOX1	PMA:AR02	-0.492144	16.013	-2.92022	0.0101534	0.1212	-2.71873
P47813	EIF1AX	PMA:AR02	-0.919827	12.6606	-2.92012	0.0101556	0.1212	-2.71892
P31150	GDI1	PMA:AR02	0.393671	18.0576	2.91777	0.0102048	0.121448	-2.72331
Q9NZ01	TECR	PMA:AR02	0.325834	14.2958	2.91697	0.0102218	0.121448	-2.72482
Q9HCK5	AGO4	PMA:AR02	0.301729	14.2984	2.91573	0.010248	0.121448	-2.72715
P60484	PTEN	PMA:AR02	-0.674791	12.9324	-2.91491	0.0102654	0.121448	-2.72868
Q9NP77	SSU72	PMA:AR02	0.799608	11.2093	2.91332	0.0102991	0.121583	-2.73167
P28066	PSMA5	PMA:AR02	0.495756	14.4102	2.91121	0.0103439	0.121678	-2.7356
P51178	PLCD1	PMA:AR02	0.378762	13.0849	2.91084	0.0103518	0.121678	-2.7363
Q6ICL3	TANGO2	PMA:AR02	1.0772	13.481	2.90909	0.0103893	0.121798	-2.73958
O43504	LAMTOR5	PMA:AR02	0.428373	15.8998	2.90829	0.0104066	0.121798	-2.74109
P11532	DMD	PMA:AR02	-0.935968	11.9405	-2.90643	0.0104466	0.122003	-2.74457
Q96Q15	SMG1	PMA:AR02	0.377537	13.1682	2.9049	0.0104797	0.122128	-2.74744
Q8NB49	ATP11C	PMA:AR02	-0.706333	13.7286	-2.90142	0.0105551	0.122443	-2.75395
Q9UBW5	BIN2	PMA:AR02	0.804636	14.9833	2.90131	0.0105575	0.122443	-2.75416
Q06787	FMR1	PMA:AR02	-0.714275	12.217	-2.90055	0.010574	0.122443	-2.75557
Q8NBE8	KLHL23	PMA:AR02	0.71297	11.6038	2.89813	0.0106269	0.122695	-2.7601
P08559	PDHA1	PMA:AR02	0.284549	14.9997	2.8975	0.0106408	0.122695	-2.76128
Q6PCB5	RSBN1L	PMA:AR02	0.863026	14.4876	2.89416	0.0107142	0.123129	-2.76752
Q9Y2I7	PIKFYVE	PMA:AR02	0.365128	12.3489	2.89374	0.0107236	0.123129	-2.76832
Q9Y4F1	FARP1	PMA:AR02	0.529954	13.1053	2.89107	0.0107828	0.123549	-2.77331
O15400	STX7	PMA:AR02	0.506782	16.0453	2.88797	0.0108519	0.124015	-2.7791
Q8N999	C12orf29	PMA:AR02	-0.700738	12.6555	-2.88721	0.010869	0.124015	-2.78053
Q6P474		PMA:AR02	-0.749102	12.0737	-2.88127	0.0110028	0.125144	-2.79162
Q8WUK0	PTPMT1	PMA:AR02	0.952402	11.2781	2.88079	0.0110138	0.125144	-2.79253
Q9Y2A7	NCKAP1	PMA:AR02	-1.23877	14.8151	-2.87697	0.0111007	0.125249	-2.79966
Q08211	DHX9	PMA:AR02	0.324988	17.8641	2.87654	0.0111107	0.125249	-2.80047
P51665	PSMD7	PMA:AR02	0.378928	15.3369	2.87592	0.0111248	0.125249	-2.80163
Q6ZRI6	C15orf39	PMA:AR02	-0.616174	11.4635	-2.87501	0.0111456	0.125249	-2.80332
Q9H1A3	METTL9	PMA:AR02	-0.930423	11.5232	-2.87429	0.0111622	0.125249	-2.80467
Q14558	PRPSAP1	PMA:AR02	0.582657	14.6658	2.87345	0.0111816	0.125249	-2.80624
P30048	PRDX3	PMA:AR02	0.364248	17.5762	2.87315	0.0111884	0.125249	-2.8068
Q9BTE1	DCTN5	PMA:AR02	1.06492	12.0566	2.87236	0.0112067	0.125249	-2.80828
Q9BRT3	MIEN1	PMA:AR02	-0.643819	12.4204	-2.86949	0.011273	0.125611	-2.81362
P55769	SNU13	PMA:AR02	-0.73783	14.7675	-2.86812	0.0113048	0.125611	-2.81618
Q969V3	NCLN	PMA:AR02	0.423697	13.7298	2.86688	0.0113338	0.125611	-2.8185
P13637	ATP1A3	PMA:AR02	0.38823	15.0152	2.86513	0.0113747	0.125611	-2.82176
P00492	HPRT1	PMA:AR02	0.344741	16.3156	2.86508	0.0113758	0.125611	-2.82185
P49790	NUP153	PMA:AR02	0.326875	14.0131	2.86502	0.0113773	0.125611	-2.82197
Q8NHP1	AKR7L	PMA:AR02	-0.954857	12.5042	-2.86396	0.0114022	0.125632	-2.82395
Q86VI3	IQGAP3	PMA:AR02	-1.38521	11.7859	-2.86251	0.0114362	0.125752	-2.82665
Q8TE77	SSH3	PMA:AR02	0.426974	16.9518	2.8615	0.01146	0.12576	-2.82853
Q86YS7	C2CD5	PMA:AR02	0.451995	13.411	2.85832	0.0115354	0.126066	-2.83447
P52758	RIDA	PMA:AR02	0.736412	10.8718	2.85778	0.011548	0.126066	-2.83547
O94804	STK10	PMA:AR02	0.518898	15.5626	2.8574	0.0115572	0.126066	-2.83619
Q8WVC6	DCAKD	PMA:AR02	0.383322	15.4806	2.85231	0.0116788	0.126705	-2.84567
Q9HAV7	GRPEL1	PMA:AR02	-0.853182	11.3647	-2.85229	0.0116793	0.126705	-2.84571
P02751	FN1	PMA:AR02	-1.18898	11.5021	-2.85149	0.0116985	0.126705	-2.84719
Q8IZP2		PMA:AR02	0.559619	15.3959	2.85079	0.0117154	0.126705	-2.8485
Q15058	KIF14	PMA:AR02	1.2847	12.1969	2.85011	0.0117319	0.126705	-2.84978
Q75QN2	INTS8	PMA:AR02	-1.14097	11.7523	-2.84721	0.011802	0.127101	-2.85517
Q9Y6D9	MAD1L1	PMA:AR02	0.447404	12.8757	2.84666	0.0118152	0.127101	-2.85619
Q8WWN8	ARAP3	PMA:AR02	0.391269	12.2939	2.84523	0.0118501	0.12711	-2.85885
O75695	RP2	PMA:AR02	0.349833	17.1817	2.84471	0.0118627	0.12711	-2.85982
Q8TB40	ABHD4	PMA:AR02	0.597942	11.569	2.84245	0.0119181	0.127159	-2.86404
P53367	ARFIP1	PMA:AR02	0.5162	13.3713	2.84208	0.0119272	0.127159	-2.86473
Q9H2W6	MRPL46	PMA:AR02	0.727753	11.2399	2.84167	0.0119372	0.127159	-2.86549
Q9NVA1	UQCC1	PMA:AR02	0.705196	11.4513	2.8357	0.0120846	0.128479	-2.8766
A3KN83	SBNO1	PMA:AR02	0.415239	12.039	2.83321	0.0121465	0.128885	-2.88122
Q8WUM0	NUP133	PMA:AR02	0.431494	13.2844	2.83055	0.0122132	0.129341	-2.88618
O14964	HGS	PMA:AR02	0.405413	15.1076	2.82708	0.0123005	0.129923	-2.89262
Q7Z4G1	COMMD6	PMA:AR02	0.654774	11.4996	2.82648	0.0123158	0.129923	-2.89375
Q8IWE5	PLEKHM2	PMA:AR02	0.555832	11.5439	2.81905	0.012505	0.131665	-2.90754
Q5T2N8	ATAD3C	PMA:AR02	0.953078	13.1901	2.81607	0.0125818	0.131772	-2.91308
Q6RW13	AGTRAP	PMA:AR02	0.615573	15.1881	2.815	0.0126094	0.131772	-2.91507
P04150	NR3C1	PMA:AR02	0.429334	12.2403	2.81432	0.012627	0.131772	-2.91633
Q9UK59	DBR1	PMA:AR02	0.388452	12.8691	2.81395	0.0126366	0.131772	-2.91702
P30273	FCER1G	PMA:AR02	-1.07231	16.7256	-2.81274	0.0126682	0.131772	-2.91927
Q9UJA5	TRMT6	PMA:AR02	0.814793	10.9482	2.81218	0.0126828	0.131772	-2.92031
P51692	STAT5B	PMA:AR02	0.330998	15.7885	2.81181	0.0126922	0.131772	-2.92099
Q96ER9	CCDC51	PMA:AR02	1.49141	9.46623	2.81069	0.0127215	0.131772	-2.92307
Q9NTK5	OLA1	PMA:AR02	0.276316	15.523	2.81026	0.0127327	0.131772	-2.92387
Q92890	UFD1	PMA:AR02	0.308375	15.4944	2.80726	0.0128114	0.132272	-2.92944
P51617	IRAK1	PMA:AR02	0.999055	10.7475	2.80586	0.0128482	0.132272	-2.93203
Q01970	PLCB3	PMA:AR02	-0.423097	11.7962	-2.80565	0.0128537	0.132272	-2.93242
Q9Y2X0	MED16	PMA:AR02	0.750885	11.0199	2.80211	0.0129473	0.132779	-2.93898
O43752	STX6	PMA:AR02	-0.477585	11.8026	-2.79977	0.0130096	0.132779	-2.94332
P22732	SLC2A5	PMA:AR02	-0.692742	13.0682	-2.79923	0.0130241	0.132779	-2.94433
Q9UBL6	CPNE7	PMA:AR02	1.03932	10.7914	2.79923	0.0130242	0.132779	-2.94433
Q5TFQ8	SIRPB1	PMA:AR02	1.00425	10.0686	2.79921	0.0130247	0.132779	-2.94437
Q6STE5	SMARCD3	PMA:AR02	1.08857	11.0504	2.79812	0.0130539	0.132828	-2.94639
Q9BSL1	UBAC1	PMA:AR02	-0.686897	14.0769	-2.79626	0.0131038	0.132997	-2.94984
Q8TAT6	NPLOC4	PMA:AR02	0.334164	13.1227	2.79568	0.0131192	0.132997	-2.95091
P26640	VARS1	PMA:AR02	0.33468	14.9858	2.79372	0.013172	0.133052	-2.95453
P50851	LRBA	PMA:AR02	0.315853	12.813	2.79367	0.0131735	0.133052	-2.95464
Q9Y2X9	ZNF281	PMA:AR02	1.18739	10.5802	2.79005	0.0132716	0.133796	-2.96134
Q9Y696	CLIC4	PMA:AR02	0.978548	11.8054	2.786	0.0133822	0.134265	-2.96884
Q9Y6V7	DDX49	PMA:AR02	1.02224	8.86762	2.7854	0.0133986	0.134265	-2.96995
Q9C0H2	TTYH3	PMA:AR02	-0.931251	11.0967	-2.78534	0.0134002	0.134265	-2.97005
P62195	PSMC5	PMA:AR02	-0.270353	14.1443	-2.78474	0.0134167	0.134265	-2.97116
Q14164	IKBKE	PMA:AR02	-1.12641	11.6191	-2.78242	0.0134807	0.134659	-2.97547
Q9BYJ9	YTHDF1	PMA:AR02	0.607019	11.5863	2.7804	0.0135364	0.134968	-2.97919
P25815	S100P	PMA:AR02	-2.25101	19.5767	-2.77928	0.0135675	0.135031	-2.98126
P43243	MATR3	PMA:AR02	0.325551	16.0432	2.77675	0.0136382	0.135487	-2.98595
Q9BRR9	ARHGAP9	PMA:AR02	0.589237	16.1707	2.77531	0.0136784	0.135613	-2.98861
P10242	MYB	PMA:AR02	0.797334	12.3642	2.77452	0.0137005	0.135613	-2.99008
Q6ZU80	CEP128	PMA:AR02	1.13937	10.9416	2.77106	0.0137978	0.135908	-2.99646
O43815	STRN	PMA:AR02	0.325724	16.2078	2.76848	0.0138708	0.135908	-3.00123
P49327	FASN	PMA:AR02	0.323105	17.5383	2.76823	0.013878	0.135908	-3.0017
Q6ZNJ1	NBEAL2	PMA:AR02	0.38108	14.708	2.76788	0.013888	0.135908	-3.00235
Q86VX2	COMMD7	PMA:AR02	0.410099	14.5587	2.76717	0.0139082	0.135908	-3.00366
Q16864	ATP6V1F	PMA:AR02	0.559959	12.8485	2.76682	0.013918	0.135908	-3.00429
Q96Q89	KIF20B	PMA:AR02	-0.829796	12.1114	-2.76605	0.01394	0.135908	-3.00572
Q14141	SEPTIN6	PMA:AR02	0.839032	15.8122	2.76581	0.0139468	0.135908	-3.00616
Q9Y336	SIGLEC9	PMA:AR02	1.53049	11.5553	2.76496	0.013971	0.135908	-3.00773
Q15404	RSU1	PMA:AR02	-0.34683	16.2488	-2.76395	0.014	0.135908	-3.00959
Q86WX3	RPS19BP1	PMA:AR02	0.902623	12.7611	2.7638	0.0140044	0.135908	-3.00988
O60831	PRAF2	PMA:AR02	0.418239	13.324	2.76251	0.0140415	0.136025	-3.01227
Q9UHD9	UBQLN2	PMA:AR02	0.49749	14.0395	2.76093	0.0140867	0.136037	-3.01517
Q00325	SLC25A3	PMA:AR02	0.417497	16.875	2.76073	0.0140926	0.136037	-3.01555
O15117	FYB1	PMA:AR02	0.524942	14.5918	2.75932	0.0141334	0.13619	-3.01815
P35251	RFC1	PMA:AR02	-0.519092	11.3283	-2.75801	0.0141712	0.136314	-3.02057
P63172	DYNLT1	PMA:AR02	1.55472	11.4665	2.75421	0.0142816	0.137134	-3.02757
Q2M2I8	AAK1	PMA:AR02	0.321607	13.7051	2.75238	0.0143353	0.137189	-3.03095
Q5SRE5	NUP188	PMA:AR02	0.309323	16.0849	2.7523	0.0143377	0.137189	-3.03111
P60709	ACTB	PMA:AR02	0.462545	21.6613	2.75009	0.0144025	0.137246	-3.03518
Q9BV86	NTMT1	PMA:AR02	1.07433	10.422	2.74937	0.0144236	0.137246	-3.0365
O00418	EEF2K	PMA:AR02	-0.835304	12.1779	-2.74852	0.0144487	0.137246	-3.03806
P17858	PFKL	PMA:AR02	0.258385	16.3926	2.74769	0.0144734	0.137246	-3.0396
Q96AT9	RPE	PMA:AR02	1.02453	12.8501	2.74736	0.0144831	0.137246	-3.04021
O94915	FRYL	PMA:AR02	0.308429	17.7547	2.74697	0.0144946	0.137246	-3.04093
Q05209	PTPN12	PMA:AR02	0.453874	14.1975	2.74536	0.0145423	0.137459	-3.04389
Q9BQE5	APOL2	PMA:AR02	0.999187	9.5651	2.74133	0.0146625	0.138356	-3.05131
Q16637	SMN1	PMA:AR02	1.23649	11.4873	2.73992	0.014705	0.138398	-3.05392
Q92478	CLEC2B	PMA:AR02	0.811892	12.4125	2.73734	0.0147825	0.138398	-3.05866
Q9UHB7	AFF4	PMA:AR02	0.5915	11.7322	2.7372	0.0147868	0.138398	-3.05892
Q5VYY1	ANKRD22	PMA:AR02	-0.321893	14.6082	-2.73627	0.0148149	0.138398	-3.06064
P21333	FLNA	PMA:AR02	0.290992	18.5924	2.73552	0.0148376	0.138398	-3.06202
Q99490	AGAP2	PMA:AR02	0.397431	13.6763	2.73549	0.0148386	0.138398	-3.06208
Q9H845	ACAD9	PMA:AR02	-0.367166	12.7883	-2.73529	0.0148447	0.138398	-3.06245
O15111	CHUK	PMA:AR02	0.331521	13.1803	2.73334	0.014904	0.138714	-3.06604
Q99759	MAP3K3	PMA:AR02	0.385648	13.9169	2.73213	0.0149406	0.138818	-3.06825
P56537	EIF6	PMA:AR02	0.461511	15.8788	2.73003	0.0150049	0.139054	-3.07212
Q9Y5K6	CD2AP	PMA:AR02	0.438083	13.8902	2.72963	0.015017	0.139054	-3.07285
Q9UBQ5	EIF3K	PMA:AR02	0.361442	14.1827	2.7239	0.0151938	0.140321	-3.0834
O95749	GGPS1	PMA:AR02	-0.540586	12.9201	-2.72353	0.0152053	0.140321	-3.08408
Q9Y2Q0	ATP8A1	PMA:AR02	0.337036	15.0752	2.71953	0.0153298	0.141231	-3.09142
Q13136	PPFIA1	PMA:AR02	0.342697	13.1305	2.71755	0.0153918	0.141344	-3.09506
P56192	MARS1	PMA:AR02	0.346602	16.9117	2.71749	0.0153939	0.141344	-3.09519
Q96C19	EFHD2	PMA:AR02	0.3944	18.1668	2.7163	0.0154312	0.141449	-3.09737
Q9H3K6	BOLA2	PMA:AR02	-0.519074	14.4032	-2.71502	0.0154715	0.141493	-3.09972
Q9NVH6	TMLHE	PMA:AR02	0.640855	11.0185	2.7145	0.0154879	0.141493	-3.10067
Q96NB2	SFXN2	PMA:AR02	0.52604	12.1257	2.71142	0.0155854	0.142145	-3.10632
Q9GZY6	LAT2	PMA:AR02	0.709138	12.8121	2.70954	0.0156454	0.142454	-3.10978
P47897	QARS1	PMA:AR02	0.411217	14.6632	2.70473	0.0157992	0.14345	-3.11859
O95573	ACSL3	PMA:AR02	0.44049	13.1349	2.70448	0.0158073	0.14345	-3.11905
A6NEC2		PMA:AR02	0.372097	15.4454	2.69736	0.0160383	0.144817	-3.13211
A2A3N6		PMA:AR02	-1.24889	13.2911	-2.69685	0.0160549	0.144817	-3.13304
Q96RU2	USP28	PMA:AR02	-1.19047	12.2796	-2.69593	0.016085	0.144817	-3.13473
Q9Y3A6	TMED5	PMA:AR02	-0.524903	12.2552	-2.69511	0.0161118	0.144817	-3.13623
Q13596	SNX1	PMA:AR02	0.529994	14.6276	2.69499	0.0161158	0.144817	-3.13645
P21281	ATP6V1B2	PMA:AR02	0.350366	17.0905	2.69495	0.0161173	0.144817	-3.13654
P50570	DNM2	PMA:AR02	0.323378	17.1625	2.69111	0.0162438	0.145713	-3.14357
Q5JSP0	FGD3	PMA:AR02	0.345876	16.0107	2.68926	0.016305	0.145732	-3.14695
Q92643	PIGK	PMA:AR02	0.446658	13.1546	2.68772	0.016356	0.145732	-3.14976
Q9BXW7	HDHD5	PMA:AR02	0.58455	11.7681	2.68602	0.0164127	0.145732	-3.15287
Q13423	NNT	PMA:AR02	0.278203	15.057	2.68591	0.0164163	0.145732	-3.15307
P62318	SNRPD3	PMA:AR02	-1.09542	16.4981	-2.68398	0.016481	0.145732	-3.15661
O14548	COX7A2L	PMA:AR02	-1.0624	11.9188	-2.68394	0.0164825	0.145732	-3.15669
Q8N0U8	VKORC1L1	PMA:AR02	-0.422414	13.799	-2.68383	0.0164859	0.145732	-3.15688
O14773	TPP1	PMA:AR02	0.444319	16.6315	2.68365	0.016492	0.145732	-3.15721
O95822	MLYCD	PMA:AR02	0.577669	11.2501	2.68307	0.0165116	0.145732	-3.15828
P39748	FEN1	PMA:AR02	0.35998	16.0148	2.68303	0.0165131	0.145732	-3.15836
Q9P2D3	HEATR5B	PMA:AR02	0.35765	14.8197	2.6805	0.0165982	0.145894	-3.16298
P43034	PAFAH1B1	PMA:AR02	0.338223	15.1744	2.68044	0.0166003	0.145894	-3.1631
P62834	RAP1A	PMA:AR02	0.865665	15.3723	2.6801	0.0166117	0.145894	-3.16371
O60547	GMDS	PMA:AR02	0.386208	13.8362	2.67793	0.016685	0.14617	-3.16767
Q9UPT8	ZC3H4	PMA:AR02	0.416995	11.6838	2.67696	0.016718	0.14617	-3.16945
Q8NFV4	ABHD11	PMA:AR02	0.579034	10.8984	2.67614	0.0167459	0.14617	-3.17095
P05155	SERPING1	PMA:AR02	0.541547	11.4588	2.67601	0.0167503	0.14617	-3.17119
Q14738	PPP2R5D	PMA:AR02	-0.371019	13.5071	-2.67471	0.0167947	0.146323	-3.17357
Q9UPN3	MACF1	PMA:AR02	0.245684	14.1266	2.67389	0.0168225	0.146332	-3.17505
P78536	ADAM17	PMA:AR02	0.429487	11.7669	2.67301	0.0168527	0.146361	-3.17667
Q68E01	INTS3	PMA:AR02	0.350273	13.1671	2.67053	0.0169379	0.146867	-3.1812
Q9BSJ8	ESYT1	PMA:AR02	0.352042	15.3578	2.65932	0.017328	0.150011	-3.20166
P26641	EEF1G	PMA:AR02	0.331219	16.2752	2.65808	0.0173716	0.150123	-3.20392
P80217	IFI35	PMA:AR02	0.483959	15.5775	2.65739	0.017396	0.150123	-3.20518
Q9NWA0	MED9	PMA:AR02	1.18617	10.062	2.65506	0.0174786	0.150541	-3.20944
Q8N573	OXR1	PMA:AR02	0.436553	12.8245	2.65422	0.0175084	0.150541	-3.21097
P23468	PTPRD	PMA:AR02	0.657518	12.8594	2.65369	0.0175272	0.150541	-3.21193
P57088	TMEM33	PMA:AR02	0.375921	15.0176	2.65184	0.0175933	0.150657	-3.21531
Q9P0S3	ORMDL1	PMA:AR02	-0.73725	13.291	-2.65103	0.0176219	0.150657	-3.21677
P26378	ELAVL4	PMA:AR02	-1.29163	13.7307	-2.65076	0.0176316	0.150657	-3.21726
P49448	GLUD2	PMA:AR02	-0.706682	14.0067	-2.65018	0.0176526	0.150657	-3.21833
Q8TAE8	GADD45GIP1	PMA:AR02	0.646385	12.2176	2.64944	0.0176789	0.150657	-3.21967
Q9Y5B8	NME7	PMA:AR02	0.983613	10.2609	2.64599	0.0178032	0.151253	-3.22596
P49757	NUMB	PMA:AR02	0.40768	14.4806	2.64596	0.0178043	0.151253	-3.22602
Q9NUP1	BLOC1S4	PMA:AR02	-0.709352	12.8207	-2.6445	0.017857	0.151264	-3.22867
P02656	APOC3	PMA:AR02	1.03012	12.6604	2.64439	0.017861	0.151264	-3.22887
P23458	JAK1	PMA:AR02	0.295763	16.3411	2.64308	0.0179086	0.151432	-3.23126
Q9HBG6	IFT122	PMA:AR02	1.26867	13.7036	2.6381	0.0180903	0.152473	-3.24032
Q86W50	METTL16	PMA:AR02	0.726959	11.3933	2.63769	0.0181052	0.152473	-3.24106
Q9HAU4	SMURF2	PMA:AR02	0.4433	17.2904	2.63741	0.0181156	0.152473	-3.24158
Q16543	CDC37	PMA:AR02	-0.587112	16.0038	-2.63482	0.0182109	0.152911	-3.24628
Q9NUJ1	ABHD10	PMA:AR02	0.413896	13.699	2.63447	0.0182237	0.152911	-3.24691
Q16563	SYPL1	PMA:AR02	-1.33186	14.455	-2.63305	0.0182764	0.153117	-3.2495
P23634	ATP2B4	PMA:AR02	0.357568	14.9746	2.63119	0.0183454	0.15345	-3.25289
O14880	MGST3	PMA:AR02	0.577992	13.5329	2.6302	0.0183822	0.15345	-3.25468
P49585	PCYT1A	PMA:AR02	-0.453377	13.4369	-2.62939	0.0184122	0.15345	-3.25614
A0FGR8	ESYT2	PMA:AR02	0.345785	15.8455	2.62863	0.0184407	0.15345	-3.25754
P48739	PITPNB	PMA:AR02	-0.268829	13.5552	-2.62766	0.018477	0.15345	-3.2593
O60313	OPA1	PMA:AR02	0.450592	13.2208	2.62745	0.0184849	0.15345	-3.25968
Q58A45	PAN3	PMA:AR02	-0.460289	11.5559	-2.62453	0.0185945	0.154125	-3.26498
Q9ULD2	MTUS1	PMA:AR02	0.690828	11.8175	2.6237	0.0186255	0.154148	-3.26648
Q9NYU2	UGGT1	PMA:AR02	0.281536	14.3573	2.62212	0.0186853	0.154363	-3.26935
P40123	CAP2	PMA:AR02	-1.14423	18.6053	-2.62137	0.0187137	0.154363	-3.27072
Q9UJ83	HACL1	PMA:AR02	0.534484	11.4516	2.6199	0.0187693	0.154363	-3.27338
P31040	SDHA	PMA:AR02	0.412064	13.9164	2.61959	0.0187812	0.154363	-3.27394
Q14344	GNA13	PMA:AR02	0.299655	19.2006	2.61928	0.018793	0.154363	-3.27451
Q96GE9	DMAC1	PMA:AR02	-1.29951	9.28682	-2.61832	0.0188293	0.154429	-3.27624
Q9NUQ9	CYRIB	PMA:AR02	0.303793	18.1757	2.61416	0.0189887	0.155299	-3.28379
O95292	VAPB	PMA:AR02	0.628672	16.252	2.61364	0.0190088	0.155299	-3.28474
P21796	VDAC1	PMA:AR02	0.446554	15.2626	2.6131	0.0190295	0.155299	-3.28572
P0DMV8	HSPA1A	PMA:AR02	0.336265	19.6442	2.61209	0.0190683	0.155299	-3.28754
Q5T0F9	CC2D1B	PMA:AR02	-0.305055	12.8049	-2.61184	0.0190779	0.155299	-3.28799
O95834	EML2	PMA:AR02	-0.51462	13.9978	-2.60953	0.0191674	0.155308	-3.29219
P50416	CPT1A	PMA:AR02	0.379131	14.1088	2.60931	0.0191757	0.155308	-3.29258
Q9NPA0	EMC7	PMA:AR02	0.434277	11.7113	2.60919	0.0191806	0.155308	-3.29281
O43464	HTRA2	PMA:AR02	0.672373	13.4246	2.60836	0.0192128	0.155308	-3.29431
Q9UPQ0	LIMCH1	PMA:AR02	-0.610884	12.5982	-2.60814	0.0192213	0.155308	-3.29471
P37287	PIGA	PMA:AR02	1.14161	10.5203	2.60629	0.0192934	0.15566	-3.29806
Q96LJ7	DHRS1	PMA:AR02	-0.463505	12.3131	-2.60508	0.0193405	0.15581	-3.30025
Q96S97	MYADM	PMA:AR02	0.742534	18.826	2.60421	0.0193744	0.155851	-3.30181
P09651	HNRNPA1	PMA:AR02	0.397828	17.3737	2.60325	0.019412	0.155851	-3.30355
P22314	UBA1	PMA:AR02	0.364742	17.1558	2.60204	0.0194596	0.155851	-3.30575
O43189	PHF1	PMA:AR02	0.867351	10.9034	2.60203	0.0194599	0.155851	-3.30576
P13489	RNH1	PMA:AR02	0.399817	18.1208	2.60077	0.0195097	0.156005	-3.30805
Q99805	TM9SF2	PMA:AR02	0.361973	13.4033	2.60009	0.0195364	0.156005	-3.30927
Q969S3	ZNF622	PMA:AR02	0.904922	10.235	2.59618	0.0196913	0.157013	-3.31635
Q7Z6I6	ARHGAP30	PMA:AR02	0.449841	14.9458	2.59502	0.0197375	0.157021	-3.31845
P35249	RFC4	PMA:AR02	-0.505493	12.885	-2.59408	0.0197751	0.157021	-3.32015
Q8NFD5	ARID1B	PMA:AR02	0.815128	10.6454	2.59399	0.0197788	0.157021	-3.32032
Q9C037	TRIM4	PMA:AR02	0.480219	12.8467	2.58958	0.0199556	0.15761	-3.32829
P09668	CTSH	PMA:AR02	0.473297	12.7259	2.58952	0.0199579	0.15761	-3.32839
O43426	SYNJ1	PMA:AR02	0.301048	13.4631	2.58932	0.0199661	0.15761	-3.32876
Q86SF2	GALNT7	PMA:AR02	0.387389	11.6887	2.58848	0.0199997	0.15761	-3.33026
Q7L590	MCM10	PMA:AR02	0.496961	15.5514	2.58837	0.0200045	0.15761	-3.33048
Q96SB4	SRPK1	PMA:AR02	0.439713	13.812	2.58783	0.0200263	0.15761	-3.33145
Q96JY6	PDLIM2	PMA:AR02	0.554258	13.3832	2.58393	0.0201845	0.158466	-3.33849
Q12979	ABR	PMA:AR02	0.421089	13.8772	2.58371	0.0201933	0.158466	-3.33888
Q5BKZ1	ZNF326	PMA:AR02	0.610426	10.5016	2.58075	0.0203141	0.159186	-3.34422
Q9C0E2	XPO4	PMA:AR02	0.405013	12.3941	2.57805	0.0204252	0.159827	-3.3491
P50749	RASSF2	PMA:AR02	0.429916	16.282	2.57646	0.0204907	0.160109	-3.35196
Q9UKX7	NUP50	PMA:AR02	0.341798	14.8378	2.57409	0.0205888	0.160645	-3.35624
O14920	IKBKB	PMA:AR02	0.338073	13.8474	2.57246	0.0206566	0.160944	-3.35918
P61106	RAB14	PMA:AR02	0.444017	16.1817	2.56986	0.0207652	0.161372	-3.36387
O75582	RPS6KA5	PMA:AR02	0.389945	13.0144	2.56973	0.0207707	0.161372	-3.36411
Q9NSC2	SALL1	PMA:AR02	-0.772528	16.9137	-2.56767	0.0208568	0.161427	-3.36781
Q14194	CRMP1	PMA:AR02	0.370912	15.3376	2.56649	0.0209065	0.161427	-3.36994
Q96A33	CCDC47	PMA:AR02	0.556567	14.2168	2.56611	0.0209225	0.161427	-3.37062
Q9H0H3	KLHL25	PMA:AR02	0.35463	13.1504	2.56568	0.0209408	0.161427	-3.3714
Q14643	ITPR1	PMA:AR02	0.333622	16.1971	2.56548	0.020949	0.161427	-3.37175
Q9BYU1	PBX4	PMA:AR02	-1.26896	8.62591	-2.56533	0.0209554	0.161427	-3.37202
Q9H1A4	ANAPC1	PMA:AR02	0.532593	11.0265	2.56451	0.02099	0.161466	-3.3735
O43759	SYNGR1	PMA:AR02	0.381678	14.3448	2.56375	0.0210223	0.161486	-3.37487
Q9H410	DSN1	PMA:AR02	0.514394	11.6078	2.55906	0.0212217	0.162164	-3.38331
O94973	AP2A2	PMA:AR02	0.30311	14.5504	2.55901	0.0212238	0.162164	-3.3834
Q8N108	MIER1	PMA:AR02	-1.45332	12.6442	-2.55743	0.0212915	0.162164	-3.38624
Q9H9Q2	COPS7B	PMA:AR02	0.403354	13.5622	2.55718	0.0213024	0.162164	-3.3867
Q92925	SMARCD2	PMA:AR02	0.422261	12.8275	2.5568	0.0213184	0.162164	-3.38737
Q5SWX8	ODR4	PMA:AR02	0.755715	10.7099	2.55677	0.0213199	0.162164	-3.38744
Q53H82	LACTB2	PMA:AR02	0.400627	13.645	2.55662	0.0213264	0.162164	-3.38771
A1L020	MEX3A	PMA:AR02	-0.905893	13.4794	-2.55571	0.0213652	0.162164	-3.38933
Q14242	SELPLG	PMA:AR02	-0.571922	13.6562	-2.55479	0.0214048	0.162164	-3.39099
P29992	GNA11	PMA:AR02	-0.572698	14.9845	-2.55473	0.0214077	0.162164	-3.39111
Q14980	NUMA1	PMA:AR02	0.355664	15.7657	2.5533	0.0214692	0.162404	-3.39367
Q5RKV6	EXOSC6	PMA:AR02	0.458268	13.256	2.55188	0.0215306	0.162545	-3.39622
Q9UK76	JPT1	PMA:AR02	0.744904	13.1195	2.55149	0.0215475	0.162545	-3.39693
Q13636	RAB31	PMA:AR02	0.486211	17.358	2.55058	0.0215872	0.162619	-3.39857
P36406	TRIM23	PMA:AR02	-0.377662	14.3881	-2.54833	0.021685	0.162701	-3.40261
Q9H4K7	MTG2	PMA:AR02	1.10607	10.6885	2.5483	0.0216861	0.162701	-3.40265
P42679	MATK	PMA:AR02	0.568024	15.4523	2.54827	0.0216875	0.162701	-3.40271
P14868	DARS1	PMA:AR02	0.370325	16.4393	2.5461	0.0217822	0.163118	-3.4066
O95347	SMC2	PMA:AR02	0.364749	13.627	2.54453	0.0218511	0.163118	-3.40942
Q13137	CALCOCO2	PMA:AR02	0.476903	11.9176	2.54338	0.0219016	0.163118	-3.41148
O15357	INPPL1	PMA:AR02	0.333605	13.3908	2.54308	0.0219148	0.163118	-3.41202
P84074	HPCA	PMA:AR02	-0.826713	12.1851	-2.54294	0.0219213	0.163118	-3.41229
P35914	HMGCL	PMA:AR02	0.596038	11.7387	2.54207	0.0219597	0.163118	-3.41385
Q14789	GOLGB1	PMA:AR02	0.495177	12.6889	2.54176	0.0219731	0.163118	-3.4144
Q9BTV4	TMEM43	PMA:AR02	0.491937	15.2462	2.5413	0.0219938	0.163118	-3.41524
Q99877	H2BC15	PMA:AR02	1.23976	16.8905	2.54088	0.0220123	0.163118	-3.41599
Q9HAJ7	SAP30L	PMA:AR02	0.860769	12.2373	2.53826	0.0221285	0.163757	-3.42069
Q16629	SRSF7	PMA:AR02	-0.34256	15.8327	-2.53586	0.0222352	0.164234	-3.42498
P50579	METAP2	PMA:AR02	0.404749	13.0885	2.53461	0.022291	0.164234	-3.42722
P62851	RPS25	PMA:AR02	-0.791925	15.8503	-2.5342	0.0223095	0.164234	-3.42796
Q13422	IKZF1	PMA:AR02	-0.565348	11.4947	-2.53378	0.0223283	0.164234	-3.42871
Q63HN8	RNF213	PMA:AR02	0.254487	14.3904	2.53331	0.0223495	0.164234	-3.42956
Q8TAP6	CEP76	PMA:AR02	-1.06015	15.1278	-2.53277	0.0223736	0.164234	-3.43052
A2RUC4	TYW5	PMA:AR02	0.505918	11.3948	2.53065	0.0224692	0.16459	-3.43433
Q9H3M7	TXNIP	PMA:AR02	0.351408	14.1747	2.53035	0.0224824	0.16459	-3.43485
Q96DE0	NUDT16	PMA:AR02	-0.343813	13.555	-2.52683	0.0226419	0.165535	-3.44116
Q13045	FLII	PMA:AR02	0.303674	15.8883	2.52181	0.0228712	0.166849	-3.45015
O95379	TNFAIP8	PMA:AR02	0.398262	16.1026	2.52156	0.0228828	0.166849	-3.4506
O60826	CCDC22	PMA:AR02	0.30261	15.7521	2.52049	0.0229318	0.166926	-3.45251
Q15173	PPP2R5B	PMA:AR02	0.61449	10.9565	2.51869	0.0230148	0.166926	-3.45573
Q12789	GTF3C1	PMA:AR02	0.328615	17.0267	2.51753	0.0230686	0.166926	-3.45781
Q9Y6G9	DYNC1LI1	PMA:AR02	0.428031	13.6481	2.5174	0.0230745	0.166926	-3.45804
Q96L93	KIF16B	PMA:AR02	0.508837	12.4511	2.51736	0.0230761	0.166926	-3.4581
O15040	TECPR2	PMA:AR02	0.372967	14.1975	2.51735	0.023077	0.166926	-3.45813
P25325	MPST	PMA:AR02	0.416926	14.4249	2.51597	0.0231409	0.167166	-3.4606
O75792	RNASEH2A	PMA:AR02	-0.527328	13.6208	-2.51249	0.0233026	0.168111	-3.46681
A6NMY6		PMA:AR02	-0.486914	14.2608	-2.51104	0.0233705	0.168379	-3.4694
P49750	YLPM1	PMA:AR02	0.400513	12.6764	2.50814	0.0235066	0.168939	-3.47458
Q9NVH2	INTS7	PMA:AR02	0.426167	12.062	2.50806	0.0235102	0.168939	-3.47471
Q99832	CCT7	PMA:AR02	0.294534	15.5296	2.50661	0.0235786	0.169208	-3.4773
Q8TCG1	CIP2A	PMA:AR02	0.919878	10.2639	2.50277	0.0237607	0.170235	-3.48416
Q92879	CELF1	PMA:AR02	-0.6197	12.9539	-2.50228	0.0237842	0.170235	-3.48504
P48443	RXRG	PMA:AR02	0.767993	11.2896	2.49868	0.0239564	0.171242	-3.49146
Q8NBU5	ATAD1	PMA:AR02	0.726268	11.3776	2.49689	0.0240419	0.171629	-3.49464
P21964	COMT	PMA:AR02	1.0987	14.0499	2.49272	0.0242434	0.172841	-3.50207
Q9NWW6	NMRK1	PMA:AR02	-0.566431	11.389	-2.48998	0.0243768	0.173566	-3.50696
P32519	ELF1	PMA:AR02	0.523983	11.9921	2.48576	0.0245835	0.174668	-3.51447
Q96RU3	FNBP1	PMA:AR02	-0.312424	14.0154	-2.48535	0.0246033	0.174668	-3.51519
P07099	EPHX1	PMA:AR02	-0.622817	14.1975	-2.48384	0.0246777	0.174668	-3.51788
Q9C0B1	FTO	PMA:AR02	0.487803	11.621	2.48377	0.0246812	0.174668	-3.518
Q8WVV9	HNRNPLL	PMA:AR02	0.387682	13.0867	2.48356	0.0246918	0.174668	-3.51838
Q9C0D5	TANC1	PMA:AR02	0.98377	15.0197	2.48224	0.0247571	0.174903	-3.52073
Q01459	CTBS	PMA:AR02	0.760135	14.2081	2.48041	0.0248473	0.175186	-3.52397
Q9Y616	IRAK3	PMA:AR02	0.564616	12.9158	2.48013	0.0248614	0.175186	-3.52447
P11215	ITGAM	PMA:AR02	0.266637	18.8139	2.47846	0.0249444	0.175431	-3.52744
Q15631	TSN	PMA:AR02	0.664239	15.7446	2.47814	0.0249604	0.175431	-3.52801
P32119	PRDX2	PMA:AR02	-0.612788	16.7367	-2.47738	0.0249985	0.175472	-3.52937
O75367	MACROH2A1	PMA:AR02	0.364005	18.8494	2.47216	0.0252603	0.17693	-3.53864
P42356	PI4KA	PMA:AR02	0.300159	18.5524	2.4715	0.0252938	0.17693	-3.53981
P28676	GCA	PMA:AR02	-0.372054	20.4403	-2.4713	0.0253036	0.17693	-3.54016
O94979	SEC31A	PMA:AR02	0.346552	14.1143	2.47059	0.0253397	0.176956	-3.54142
Q9UKZ1	CNOT11	PMA:AR02	-0.531059	11.7622	-2.46933	0.0254035	0.177175	-3.54366
Q00610	CLTC	PMA:AR02	0.29955	17.4111	2.46859	0.0254408	0.177209	-3.54497
P46019	PHKA2	PMA:AR02	0.282098	14.5673	2.46724	0.0255097	0.177461	-3.54737
Q9ULC5	ACSL5	PMA:AR02	0.657116	13.6453	2.46547	0.0255996	0.17786	-3.5505
Q9UGJ1	TUBGCP4	PMA:AR02	0.681184	11.5534	2.46483	0.0256326	0.177863	-3.55164
P62829	RPL23	PMA:AR02	-0.505394	14.4348	-2.46295	0.0257286	0.178302	-3.55496
Q9Y3X0	CCDC9	PMA:AR02	0.651244	12.5997	2.46137	0.0258098	0.178504	-3.55777
P41252	IARS1	PMA:AR02	0.251889	15.0994	2.46111	0.0258231	0.178504	-3.55822
P30085	CMPK1	PMA:AR02	0.320895	16.1264	2.45919	0.0259221	0.17887	-3.56162
O43566	RGS14	PMA:AR02	0.310339	15.091	2.45881	0.0259417	0.17887	-3.5623
Q9NP79	VTA1	PMA:AR02	0.381072	14.6465	2.45643	0.0260655	0.179275	-3.56652
Q9Y5K8	ATP6V1D	PMA:AR02	0.756954	12.7824	2.45607	0.0260838	0.179275	-3.56715
Q9GZR7	DDX24	PMA:AR02	0.667252	11.7868	2.45518	0.0261303	0.179275	-3.56873
P38646	HSPA9	PMA:AR02	0.225543	16.0142	2.45515	0.026132	0.179275	-3.56879
O00712	NFIB	PMA:AR02	-0.921217	16.8633	-2.4541	0.0261864	0.179284	-3.57063
Q969T4	UBE2E3	PMA:AR02	0.641648	13.0756	2.45333	0.0262269	0.179284	-3.57201
Q96AE4	FUBP1	PMA:AR02	0.256809	15.6994	2.45323	0.0262318	0.179284	-3.57217
P49441	INPP1	PMA:AR02	-0.55057	11.8907	-2.45165	0.026315	0.179399	-3.57499
Q8N5Y2	MSL3	PMA:AR02	-0.607061	11.4582	-2.45143	0.0263262	0.179399	-3.57537
Q15022	SUZ12	PMA:AR02	-0.446573	11.8151	-2.45103	0.0263473	0.179399	-3.57608
O14979	HNRNPDL	PMA:AR02	0.363523	16.6944	2.44884	0.0264623	0.179867	-3.57994
Q9H300	PARL	PMA:AR02	0.882943	11.8505	2.44785	0.0265143	0.179867	-3.58169
Q8IZ07	ANKRD13A	PMA:AR02	0.484217	13.5009	2.44784	0.026515	0.179867	-3.58171
Q99848	EBNA1BP2	PMA:AR02	-1.67488	10.2657	-2.44658	0.0265817	0.180095	-3.58394
Q9Y2V2	CARHSP1	PMA:AR02	-0.553753	14.8005	-2.44389	0.0267246	0.18063	-3.5887
Q05086	UBE3A	PMA:AR02	0.433927	12.021	2.44342	0.0267492	0.18063	-3.58952
P28070	PSMB4	PMA:AR02	0.324533	15.8271	2.44322	0.02676	0.18063	-3.58988
Q9UPU5	USP24	PMA:AR02	0.227453	13.5666	2.4411	0.0268734	0.180975	-3.59363
Q9UHY7	ENOPH1	PMA:AR02	0.435746	14.9921	2.4399	0.0269376	0.180975	-3.59575
Q9Y678	COPG1	PMA:AR02	0.279206	15.3206	2.4396	0.0269535	0.180975	-3.59627
Q15393	SF3B3	PMA:AR02	0.234019	14.6324	2.43958	0.0269546	0.180975	-3.59631
P16520	GNB3	PMA:AR02	-1.38755	13.9825	-2.43875	0.0269992	0.180975	-3.59778
Q16698	DECR1	PMA:AR02	-0.47582	14.2984	-2.43769	0.0270559	0.180975	-3.59964
Q8WYA6	CTNNBL1	PMA:AR02	0.447339	13.6027	2.43738	0.0270728	0.180975	-3.60019
Q9NVV5	AIG1	PMA:AR02	0.945639	10.2253	2.43731	0.0270765	0.180975	-3.60031
Q8TDM6	DLG5	PMA:AR02	0.921409	12.8486	2.43503	0.0271998	0.181518	-3.60434
O75347	TBCA	PMA:AR02	-0.416424	16.7041	-2.43457	0.0272244	0.181518	-3.60515
P49588	AARS1	PMA:AR02	-0.347743	12.7166	-2.43339	0.0272885	0.181577	-3.60723
P36222	CHI3L1	PMA:AR02	0.304861	16.6482	2.43271	0.0273255	0.181577	-3.60843
P78371	CCT2	PMA:AR02	0.265235	16.1253	2.43257	0.0273332	0.181577	-3.60868
Q86Y82	STX12	PMA:AR02	0.436071	13.7525	2.431	0.0274185	0.181923	-3.61145
P30838	ALDH3A1	PMA:AR02	0.515098	13.8841	2.42949	0.0275009	0.182248	-3.61411
P10153	RNASE2	PMA:AR02	0.391041	19.4397	2.42835	0.0275629	0.182339	-3.61611
Q9Y2X8	UBE2D4	PMA:AR02	1.94286	13.0559	2.42801	0.0275816	0.182339	-3.61671
Q9BYX2	TBC1D2	PMA:AR02	0.721693	11.8129	2.42592	0.0276967	0.182879	-3.6204
Q9NPY3	CD93	PMA:AR02	0.767805	15.0846	2.42075	0.0279821	0.184401	-3.62949
Q9P0I2	EMC3	PMA:AR02	0.385579	13.4321	2.42048	0.0279975	0.184401	-3.62998
P31930	UQCRC1	PMA:AR02	-0.365459	14.5013	-2.41992	0.0280287	0.184401	-3.63096
Q96QR8	PURB	PMA:AR02	0.978879	11.2472	2.41809	0.0281305	0.184831	-3.63418
P22087	FBL	PMA:AR02	0.268077	14.7594	2.41679	0.0282033	0.184831	-3.63647
Q9H0U6	MRPL18	PMA:AR02	0.59394	10.9448	2.41675	0.0282053	0.184831	-3.63653
P14324	FDPS	PMA:AR02	-0.38101	15.0004	-2.41632	0.0282296	0.184831	-3.63729
P07948	LYN	PMA:AR02	0.361232	16.3573	2.41557	0.0282712	0.184853	-3.6386
Q9H270	VPS11	PMA:AR02	0.360017	13.7195	2.41478	0.028316	0.184853	-3.64
O15116	LSM1	PMA:AR02	0.519495	14.0344	2.4137	0.0283764	0.184853	-3.64189
O96005	CLPTM1	PMA:AR02	0.482453	11.9683	2.41338	0.0283948	0.184853	-3.64246
Q14152	EIF3A	PMA:AR02	0.316225	15.5253	2.41324	0.0284025	0.184853	-3.6427
P50613	CDK7	PMA:AR02	0.637267	11.1697	2.4119	0.0284783	0.184858	-3.64507
Q16831	UPP1	PMA:AR02	-0.476397	13.0258	-2.41143	0.0285046	0.184858	-3.64588
Q7Z3B4	NUP54	PMA:AR02	0.338454	12.9531	2.41143	0.0285048	0.184858	-3.64589
Q14203	DCTN1	PMA:AR02	0.336167	14.7258	2.40994	0.0285888	0.185182	-3.6485
P61019	RAB2A	PMA:AR02	0.506563	15.2198	2.40815	0.0286906	0.185621	-3.65164
Q9H7D0	DOCK5	PMA:AR02	0.267441	15.4559	2.4073	0.0287388	0.185677	-3.65313
O43805	SSNA1	PMA:AR02	-0.726595	10.3502	-2.4068	0.0287674	0.185677	-3.65401
Q6P4A8	PLBD1	PMA:AR02	0.775801	17.0532	2.40425	0.0289134	0.186199	-3.65849
P49792	RANBP2	PMA:AR02	0.282465	13.4954	2.40419	0.0289165	0.186199	-3.65859
Q9NUQ8	ABCF3	PMA:AR02	0.329956	14.2512	2.40205	0.0290396	0.186531	-3.66235
P61964	WDR5	PMA:AR02	0.367233	13.397	2.40191	0.0290475	0.186531	-3.66259
P78314	SH3BP2	PMA:AR02	0.532193	12.3233	2.40151	0.0290707	0.186531	-3.6633
Q9BVC4	MLST8	PMA:AR02	1.09613	10.4459	2.39852	0.0292436	0.18742	-3.66855
Q13163	MAP2K5	PMA:AR02	0.985618	9.50911	2.39636	0.0293689	0.188002	-3.67233
Q96EP5	DAZAP1	PMA:AR02	0.687343	14.0837	2.39141	0.0296579	0.189515	-3.681
P46976	GYG1	PMA:AR02	-0.298762	18.2783	-2.39112	0.0296747	0.189515	-3.6815
P15170	GSPT1	PMA:AR02	0.460371	14.3568	2.39009	0.0297351	0.189679	-3.6833
Q13094	LCP2	PMA:AR02	0.282445	15.5336	2.38848	0.0298302	0.190063	-3.68612
Q5SW96	LDLRAP1	PMA:AR02	0.588959	10.2257	2.38392	0.0301002	0.19136	-3.69409
P20702	ITGAX	PMA:AR02	0.446839	14.1463	2.38384	0.0301055	0.19136	-3.69424
Q6PHR2	ULK3	PMA:AR02	0.872642	11.4159	2.38327	0.030139	0.19136	-3.69523
Q15057	ACAP2	PMA:AR02	0.296721	15.6561	2.37908	0.0303898	0.192728	-3.70255
P30405	PPIF	PMA:AR02	0.600237	13.3811	2.37798	0.030456	0.192781	-3.70448
P08631	HCK	PMA:AR02	0.620653	15.8979	2.3773	0.030497	0.192781	-3.70567
Q9H2D6	TRIOBP	PMA:AR02	0.415159	12.5127	2.37718	0.0305043	0.192781	-3.70588
Q9UI08	EVL	PMA:AR02	0.644202	12.8162	2.37646	0.0305476	0.192786	-3.70713
P60660	MYL6	PMA:AR02	0.285517	19.2201	2.37599	0.0305758	0.192786	-3.70795
O60762	DPM1	PMA:AR02	0.381855	13.3825	2.37514	0.0306269	0.192886	-3.70942
P54819	AK2	PMA:AR02	-0.353495	16.6964	-2.37438	0.0306729	0.192953	-3.71075
P29374	ARID4A	PMA:AR02	0.717085	11.8639	2.37309	0.0307514	0.193223	-3.71301
Q8TBC4	UBA3	PMA:AR02	0.326119	13.4067	2.37244	0.0307911	0.19325	-3.71415
Q6PD74	AAGAB	PMA:AR02	0.535828	11.3042	2.37158	0.0308434	0.193356	-3.71565
Q86YP4	GATAD2A	PMA:AR02	0.374901	13.364	2.3696	0.0309638	0.193831	-3.71909
O94826	TOMM70	PMA:AR02	0.364694	13.3708	2.36917	0.0309903	0.193831	-3.71984
Q13158	FADD	PMA:AR02	0.698319	13.3741	2.36811	0.0310553	0.194015	-3.72169
Q15596	NCOA2	PMA:AR02	0.770847	11.1115	2.36444	0.0312806	0.195176	-3.72808
P43353	ALDH3B1	PMA:AR02	0.333681	16.823	2.36361	0.0313323	0.195176	-3.72954
Q9UNS2	COPS3	PMA:AR02	0.39621	13.1329	2.36335	0.0313483	0.195176	-3.72999
O75419	CDC45	PMA:AR02	0.960832	13.8103	2.36257	0.0313965	0.195252	-3.73134
P16104	H2AX	PMA:AR02	-0.38318	22.3467	-2.35973	0.0315729	0.196126	-3.73629
P49841	GSK3B	PMA:AR02	0.371632	12.6722	2.35808	0.0316758	0.196542	-3.73916
P48730	CSNK1D	PMA:AR02	0.315294	12.2927	2.35621	0.0317927	0.197042	-3.74241
P12694	BCKDHA	PMA:AR02	0.679873	11.218	2.3547	0.0318871	0.197403	-3.74503
Q8TCU6	PREX1	PMA:AR02	0.345366	14.8823	2.35394	0.0319351	0.19744	-3.74636
Q9P2P1	NYNRIN	PMA:AR02	0.531975	13.1647	2.35331	0.0319751	0.19744	-3.74746
Q8N2G8	GHDC	PMA:AR02	0.439157	11.8925	2.35288	0.0320017	0.19744	-3.74819
Q6IQ23	PLEKHA7	PMA:AR02	-0.467931	12.6885	-2.35188	0.0320651	0.197608	-3.74994
P36405	ARL3	PMA:AR02	0.25411	14.3898	2.34974	0.0322003	0.198005	-3.75365
Q9UNN5	FAF1	PMA:AR02	0.394856	13.1062	2.34971	0.0322021	0.198005	-3.7537
O15021	MAST4	PMA:AR02	0.477693	15.6961	2.34913	0.0322389	0.198008	-3.75471
Q9NSE4	IARS2	PMA:AR02	0.317001	13.3093	2.34773	0.0323282	0.198116	-3.75715
P29401	TKT	PMA:AR02	0.364857	19.8761	2.34662	0.0323989	0.198116	-3.75908
P00395	COX1	PMA:AR02	-1.08696	11.0689	-2.34613	0.0324303	0.198116	-3.75993
Q8NHM5	KDM2B	PMA:AR02	0.505093	13.6161	2.34607	0.0324341	0.198116	-3.76003
Q92562	FIG4	PMA:AR02	-0.789663	10.9605	-2.34539	0.0324773	0.198116	-3.76121
O60437	PPL	PMA:AR02	-0.394728	13.5546	-2.34521	0.032489	0.198116	-3.76152
O94921	CDK14	PMA:AR02	-0.852777	10.5365	-2.3441	0.0325597	0.198116	-3.76344
O43633	CHMP2A	PMA:AR02	-0.73041	15.0026	-2.34307	0.0326257	0.198116	-3.76523
Q8IWU2	LMTK2	PMA:AR02	0.355809	13.213	2.34288	0.0326384	0.198116	-3.76557
Q8TBP5	FAM174A	PMA:AR02	1.2538	9.02339	2.34246	0.0326653	0.198116	-3.7663
Q9UL54	TAOK2	PMA:AR02	0.427537	12.3799	2.34244	0.0326663	0.198116	-3.76632
Q7Z3U7	MON2	PMA:AR02	0.309904	13.2662	2.34167	0.0327156	0.198116	-3.76765
O43741	PRKAB2	PMA:AR02	0.438319	12.0587	2.34147	0.0327288	0.198116	-3.76801
P14923	JUP	PMA:AR02	0.8607	13.6586	2.3403	0.0328043	0.198252	-3.77004
Q9NTJ3	SMC4	PMA:AR02	0.54773	12.4102	2.33951	0.0328554	0.198252	-3.77141
Q16181	SEPTIN7	PMA:AR02	0.541535	14.7046	2.33943	0.0328602	0.198252	-3.77154
P33121	ACSL1	PMA:AR02	0.35921	16.0378	2.33697	0.0330197	0.198994	-3.77581
O00391	QSOX1	PMA:AR02	0.350876	16.8503	2.33453	0.0331783	0.199565	-3.78003
Q86V88	MDP1	PMA:AR02	0.449353	14.4427	2.33439	0.0331876	0.199565	-3.78028
P62333	PSMC6	PMA:AR02	0.278509	15.2676	2.3337	0.0332325	0.199615	-3.78147
Q7RTV0	PHF5A	PMA:AR02	0.345871	13.0235	2.33017	0.0334643	0.200387	-3.78759
Q9NZM3	ITSN2	PMA:AR02	0.308309	13.3346	2.32965	0.033498	0.200387	-3.78848
O43172	PRPF4	PMA:AR02	0.336913	13.8191	2.32934	0.0335186	0.200387	-3.78902
Q9UJY4	GGA2	PMA:AR02	-0.69624	12.5745	-2.32913	0.0335325	0.200387	-3.78939
Q9NSD9	FARSB	PMA:AR02	0.2321	15.0687	2.32894	0.0335447	0.200387	-3.78971
O00584	RNASET2	PMA:AR02	0.303325	15.8016	2.32785	0.0336169	0.200598	-3.7916
Q5JS37	NHLRC3	PMA:AR02	-0.46463	12.8647	-2.32728	0.0336542	0.200601	-3.79258
O75400	PRPF40A	PMA:AR02	0.49333	14.2897	2.32446	0.0338412	0.201374	-3.79746
Q9UMY4	SNX12	PMA:AR02	-0.314547	14.2832	-2.32421	0.0338578	0.201374	-3.79789
Q9Y2H0	DLGAP4	PMA:AR02	0.886174	11.3754	2.31989	0.0341462	0.202616	-3.80536
Q9H583	HEATR1	PMA:AR02	-0.537856	11.55	-2.31913	0.0341975	0.202616	-3.80668
P15848	ARSB	PMA:AR02	0.2742	15.4694	2.31852	0.0342384	0.202616	-3.80773
Q9BVL4	SELENOO	PMA:AR02	0.374014	12.3361	2.31799	0.034274	0.202616	-3.80864
Q16775	HAGH	PMA:AR02	0.363507	14.2659	2.3176	0.0343	0.202616	-3.80931
Q9NZN3	EHD3	PMA:AR02	-0.470842	14.0252	-2.31746	0.0343093	0.202616	-3.80955
O75694	NUP155	PMA:AR02	0.337763	13.9704	2.31709	0.0343345	0.202616	-3.81019
P11049	CD37	PMA:AR02	1.01466	13.3738	2.31665	0.0343638	0.202616	-3.81095
P11172	UMPS	PMA:AR02	0.323905	13.1614	2.31418	0.0345307	0.203381	-3.81521
Q8IZQ1	WDFY3	PMA:AR02	0.266848	12.7293	2.31172	0.0346976	0.203719	-3.81945
Q9UL33	TRAPPC2L	PMA:AR02	-0.630037	10.9754	-2.31132	0.0347252	0.203719	-3.82015
Q8N9V3	WDSUB1	PMA:AR02	0.6248	11.1627	2.31122	0.0347318	0.203719	-3.82032
Q6NYC8	PPP1R18	PMA:AR02	-0.48475	13.8518	-2.31114	0.0347375	0.203719	-3.82046
P61960	UFM1	PMA:AR02	0.611596	15.5494	2.30987	0.0348234	0.203985	-3.82264
Q9H1K1	ISCU	PMA:AR02	0.667187	10.2907	2.30936	0.0348586	0.203985	-3.82352
Q8IXJ9	ASXL1	PMA:AR02	0.888914	12.5631	2.30869	0.0349042	0.203985	-3.82467
Q86T03	PIP4P1	PMA:AR02	0.354004	13.6479	2.3081	0.0349444	0.203985	-3.82569
Q03518	TAP1	PMA:AR02	0.378518	14.5341	2.30773	0.03497	0.203985	-3.82633
P01889	HLA-B	PMA:AR02	-0.697311	14.426	-2.30652	0.0350531	0.204252	-3.82842
Q9NTX5	ECHDC1	PMA:AR02	0.283746	14.5095	2.30326	0.0352778	0.205212	-3.83403
Q9H1C4	UNC93B1	PMA:AR02	0.754079	11.8903	2.30303	0.0352931	0.205212	-3.83441
P62277	RPS13	PMA:AR02	-0.440901	16.5041	-2.30071	0.0354539	0.205927	-3.83841
Q9NZC3	GDE1	PMA:AR02	0.405324	12.6335	2.29845	0.0356115	0.206344	-3.84231
P24539	ATP5PB	PMA:AR02	0.607254	15.4687	2.29776	0.0356595	0.206344	-3.84349
P61224	RAP1B	PMA:AR02	0.396762	19.2666	2.2976	0.0356708	0.206344	-3.84377
O95476	CTDNEP1	PMA:AR02	0.524878	12.3691	2.29732	0.0356898	0.206344	-3.84424
O00148	DDX39A	PMA:AR02	-0.338886	13.9611	-2.29696	0.0357149	0.206344	-3.84486
P49427	CDC34	PMA:AR02	0.463007	11.3716	2.29341	0.0359638	0.207437	-3.85096
P05141	SLC25A5	PMA:AR02	-0.339149	17.2941	-2.29221	0.0360482	0.207437	-3.85302
Q9UPN9	TRIM33	PMA:AR02	0.368112	12.0004	2.29185	0.0360739	0.207437	-3.85364
Q9NQ48	LZTFL1	PMA:AR02	0.397532	12.6363	2.29141	0.0361049	0.207437	-3.8544
Q96S19	METTL26	PMA:AR02	0.661213	9.80867	2.29064	0.0361595	0.207437	-3.85572
P61586	RHOA	PMA:AR02	0.244375	17.7739	2.29038	0.0361774	0.207437	-3.85616
P49023	PXN	PMA:AR02	0.481981	14.9099	2.28965	0.0362297	0.207437	-3.85743
Q8NEY8	PPHLN1	PMA:AR02	0.858852	12.2139	2.28933	0.036252	0.207437	-3.85797
O60449	LY75	PMA:AR02	0.620717	12.4591	2.28924	0.0362585	0.207437	-3.85813
Q86VM9	ZC3H18	PMA:AR02	0.587299	12.2027	2.28887	0.0362844	0.207437	-3.85875
P16435	POR	PMA:AR02	0.391423	15.0419	2.28815	0.0363361	0.207515	-3.86
P84095	RHOG	PMA:AR02	0.386706	17.329	2.28602	0.0364871	0.208159	-3.86364
P02750	LRG1	PMA:AR02	-0.588551	14.3449	-2.28353	0.0366653	0.20877	-3.86792
Q86VR2	RETREG3	PMA:AR02	0.476662	11.9883	2.28345	0.0366707	0.20877	-3.86805
O00487	PSMD14	PMA:AR02	-0.274206	13.8835	-2.28183	0.036787	0.209004	-3.87083
Q9P2E9	RRBP1	PMA:AR02	0.418961	13.1777	2.28181	0.0367884	0.209004	-3.87086
Q9NZ52	GGA3	PMA:AR02	0.39132	14.4154	2.2799	0.0369259	0.209567	-3.87414
Q8N1G2	CMTR1	PMA:AR02	0.449974	12.2753	2.27864	0.0370169	0.209721	-3.8763
O00519	FAAH	PMA:AR02	-0.775986	11.2083	-2.27846	0.0370299	0.209721	-3.8766
Q96JH8	RADIL	PMA:AR02	1.97213	15.7832	2.2774	0.0371069	0.209856	-3.87843
Q8WWY3	PRPF31	PMA:AR02	0.359774	13.9808	2.27707	0.0371307	0.209856	-3.87899
Q9Y3B2	EXOSC1	PMA:AR02	0.505122	11.6547	2.27606	0.0372039	0.210052	-3.88072
P25963	NFKBIA	PMA:AR02	0.978497	10.1927	2.27516	0.0372694	0.210204	-3.88226
Q9Y2Y9	KLF13	PMA:AR02	0.97227	10.8792	2.27443	0.0373226	0.210287	-3.88351
Q9P0S9	TMEM14C	PMA:AR02	0.53656	11.996	2.27349	0.037391	0.210292	-3.88512
O00507	USP9Y	PMA:AR02	-0.219945	14.7933	-2.27324	0.0374091	0.210292	-3.88554
Q6Y1H2	HACD2	PMA:AR02	0.683901	11.8373	2.27248	0.0374644	0.210292	-3.88684
P63220	RPS21	PMA:AR02	-0.43963	15.9183	-2.2723	0.0374778	0.210292	-3.88715
Q5SW79	CEP170	PMA:AR02	0.41828	13.1262	2.27119	0.0375588	0.210429	-3.88905
Q9BWM7	SFXN3	PMA:AR02	0.353637	13.6039	2.27091	0.0375793	0.210429	-3.88952
Q9BW83	IFT27	PMA:AR02	-0.31739	12.8547	-2.26971	0.0376677	0.210582	-3.89158
P49184	DNASE1L1	PMA:AR02	0.502671	12.4796	2.26918	0.0377063	0.210582	-3.89248
P11413	G6PD	PMA:AR02	0.324186	19.5042	2.26849	0.0377573	0.210582	-3.89367
P08697	SERPINF2	PMA:AR02	0.520489	15.0971	2.26843	0.0377611	0.210582	-3.89376
P15309	ACP3	PMA:AR02	0.652849	13.1443	2.26731	0.0378443	0.21083	-3.89569
Q7RTR2	NLRC3	PMA:AR02	-0.650796	14.1558	-2.2665	0.0379041	0.210948	-3.89707
Q9NR81	ARHGEF3	PMA:AR02	-0.886422	13.6758	-2.26351	0.0381254	0.211408	-3.90217
Q6UW63	POGLUT2	PMA:AR02	0.433609	13.7154	2.26336	0.0381365	0.211408	-3.90243
Q9BY43	CHMP4A	PMA:AR02	0.407873	12.2357	2.26334	0.0381379	0.211408	-3.90246
Q14790	CASP8	PMA:AR02	0.350932	14.7879	2.26265	0.038189	0.211408	-3.90363
Q9GZT3	SLIRP	PMA:AR02	0.414722	12.4646	2.26232	0.0382134	0.211408	-3.90419
Q9UKF6	CPSF3	PMA:AR02	0.311964	16.5956	2.26224	0.0382194	0.211408	-3.90433
P11233	RALA	PMA:AR02	-0.439808	16.783	-2.2613	0.0382898	0.211583	-3.90594
Q92551	IP6K1	PMA:AR02	0.438872	11.7054	2.25939	0.0384322	0.212155	-3.9092
Q92688	ANP32B	PMA:AR02	0.367822	16.6879	2.25885	0.038473	0.212166	-3.91012
Q9BV73	CEP250	PMA:AR02	0.424818	15.1667	2.2582	0.0385215	0.212218	-3.91123
O94888	UBXN7	PMA:AR02	0.378389	13.692	2.25763	0.0385642	0.212239	-3.9122
Q68CQ7	GLT8D1	PMA:AR02	-0.682371	9.71097	-2.25637	0.0386585	0.212544	-3.91434
O60641	SNAP91	PMA:AR02	-0.57782	14.9069	-2.25505	0.0387585	0.212759	-3.9166
Q8IXI1	RHOT2	PMA:AR02	0.269911	15.1239	2.25433	0.0388129	0.212759	-3.91783
Q9UGN4	CD300A	PMA:AR02	0.74159	12.733	2.2543	0.0388146	0.212759	-3.91787
O95249	GOSR1	PMA:AR02	0.72169	12.4108	2.25175	0.0390077	0.213368	-3.92221
Q9HB58	SP110	PMA:AR02	0.496657	13.4113	2.25122	0.0390485	0.213368	-3.92313
Q8WWQ0	PHIP	PMA:AR02	0.350757	12.5082	2.25097	0.0390673	0.213368	-3.92355
Q9NRN7	AASDHPPT	PMA:AR02	0.43382	12.5223	2.25077	0.0390823	0.213368	-3.92389
Q4G0N4	NADK2	PMA:AR02	0.332368	13.8482	2.24796	0.0392962	0.214185	-3.92866
O75330	HMMR	PMA:AR02	0.733529	11.7902	2.24778	0.0393104	0.214185	-3.92898
O14983	ATP2A1	PMA:AR02	-0.443053	14.7757	-2.24651	0.0394077	0.214501	-3.93114
Q9GZT9	EGLN1	PMA:AR02	0.433071	12.3483	2.24413	0.0395898	0.215076	-3.93518
Q8N0W3	FCSK	PMA:AR02	0.688266	11.2453	2.24303	0.039675	0.215076	-3.93706
Q9UBV2	SEL1L	PMA:AR02	0.535755	11.5194	2.24292	0.039683	0.215076	-3.93723
P52564	MAP2K6	PMA:AR02	-0.336514	13.3064	-2.24275	0.0396961	0.215076	-3.93752
Q9H8S9	MOB1A	PMA:AR02	0.662817	15.7115	2.24218	0.0397404	0.215076	-3.9385
P19174	PLCG1	PMA:AR02	0.936078	13.1804	2.24136	0.0398036	0.215076	-3.93989
Q8WVR3	TRAPPC14	PMA:AR02	0.513271	11.4833	2.2411	0.0398235	0.215076	-3.94033
P00505	GOT2	PMA:AR02	-0.387255	15.0959	-2.24103	0.039829	0.215076	-3.94045
Q9BY49	PECR	PMA:AR02	0.408402	12.8021	2.23847	0.0400278	0.215936	-3.9448
Q8NEZ5	FBXO22	PMA:AR02	-0.373113	12.4705	-2.23792	0.0400706	0.215954	-3.94574
P83111	LACTB	PMA:AR02	0.478177	13.0278	2.23655	0.0401773	0.216315	-3.94806
P07332	FES	PMA:AR02	0.330548	15.0711	2.23563	0.0402492	0.216488	-3.94963
Q9H0I9	TKTL2	PMA:AR02	0.509941	15.631	2.23435	0.0403488	0.216642	-3.95179
P05362	ICAM1	PMA:AR02	0.483866	12.7788	2.23417	0.0403634	0.216642	-3.9521
Q9UBT2	UBA2	PMA:AR02	-0.351461	13.8672	-2.23374	0.0403969	0.216642	-3.95283
O00746	NME4	PMA:AR02	1.04753	10.7005	2.23247	0.0404965	0.216963	-3.95498
Q9H0E2	TOLLIP	PMA:AR02	0.335726	14.8096	2.23188	0.0405426	0.216997	-3.95598
Q9Y2L9	LRCH1	PMA:AR02	0.403518	12.6587	2.22984	0.0407033	0.217631	-3.95943
Q9UKN8	GTF3C4	PMA:AR02	0.586832	11.1369	2.22937	0.0407409	0.217631	-3.96024
Q8IU68	TMC8	PMA:AR02	0.737235	12.9112	2.22882	0.0407842	0.217649	-3.96117
P56378	ATP5MJ	PMA:AR02	-0.688019	12.7706	-2.22817	0.0408352	0.217708	-3.96226
Q06210	GFPT1	PMA:AR02	0.362362	14.1392	2.2275	0.0408887	0.21778	-3.96341
Q96CW1	AP2M1	PMA:AR02	0.268238	14.9984	2.22576	0.0410266	0.218301	-3.96635
Q8NDX5	PHC3	PMA:AR02	0.81653	9.3485	2.22379	0.0411839	0.218925	-3.96969
Q8IY17	PNPLA6	PMA:AR02	-0.295192	12.7278	-2.22232	0.0413009	0.219111	-3.97217
B0I1T2	MYO1G	PMA:AR02	0.273573	15.6915	2.22209	0.0413191	0.219111	-3.97255
Q8N335	GPD1L	PMA:AR02	0.324048	12.9885	2.22184	0.0413394	0.219111	-3.97298
Q6P4F7	ARHGAP11A	PMA:AR02	0.49541	14.0578	2.22042	0.0414535	0.219293	-3.97539
Q15843	NEDD8	PMA:AR02	-0.509518	14.6215	-2.21994	0.0414918	0.219293	-3.9762
Q9NUU6	OTULINL	PMA:AR02	0.49108	14.7431	2.21991	0.0414944	0.219293	-3.97625
O15084	ANKRD28	PMA:AR02	0.488254	12.8856	2.2175	0.0416884	0.219592	-3.98032
Q9Y2Q3	GSTK1	PMA:AR02	0.264096	14.6982	2.21705	0.0417244	0.219592	-3.98108
O15269	SPTLC1	PMA:AR02	0.460013	13.0081	2.2169	0.0417371	0.219592	-3.98134
P08240	SRPRA	PMA:AR02	0.2978	13.8325	2.21677	0.0417472	0.219592	-3.98155
O15530	PDPK1	PMA:AR02	0.424005	12.7084	2.21641	0.041776	0.219592	-3.98216
Q8IXM6	NRM	PMA:AR02	-0.305129	14.304	-2.21621	0.0417925	0.219592	-3.9825
Q7Z4V5	HDGFL2	PMA:AR02	-0.955561	15.7065	-2.21472	0.0419134	0.220015	-3.98502
Q96EE4	CCDC126	PMA:AR02	-0.965477	10.4646	-2.21356	0.0420078	0.220154	-3.98699
P54886	ALDH18A1	PMA:AR02	0.379064	11.7978	2.2134	0.0420206	0.220154	-3.98725
P00813	ADA	PMA:AR02	0.293327	13.9659	2.211	0.042216	0.220838	-3.9913
P15954	COX7C	PMA:AR02	-0.665267	14.6009	-2.2108	0.0422321	0.220838	-3.99164
O43294	TGFB1I1	PMA:AR02	-0.446039	11.6654	-2.21017	0.0422841	0.220898	-3.99271
Q8IXB1	DNAJC10	PMA:AR02	0.600897	15.434	2.20909	0.042372	0.221145	-3.99452
Q9BWJ5	SF3B5	PMA:AR02	0.568433	12.0518	2.20626	0.0426046	0.22202	-3.99929
P12955	PEPD	PMA:AR02	0.533509	12.2131	2.20592	0.0426325	0.22202	-3.99987
P22626	HNRNPA2B1	PMA:AR02	0.287957	18.6632	2.20518	0.0426934	0.22202	-4.00111
Q96AA3	RFT1	PMA:AR02	0.443415	14.0722	2.20507	0.0427027	0.22202	-4.0013
O95786	RIGI	PMA:AR02	0.368004	13.9762	2.20449	0.0427503	0.22202	-4.00227
A5YKK6	CNOT1	PMA:AR02	0.239058	14.1964	2.20378	0.0428096	0.22202	-4.00348
Q06187	BTK	PMA:AR02	0.303644	13.8933	2.20359	0.0428246	0.22202	-4.00379
Q96LC7	SIGLEC10	PMA:AR02	0.46322	11.2191	2.20298	0.0428755	0.222073	-4.00482
P53611	RABGGTB	PMA:AR02	0.612636	10.8902	2.20134	0.0430115	0.222566	-4.00758
P19878	NCF2	PMA:AR02	0.426575	18.5844	2.20024	0.0431034	0.22283	-4.00945
Q9NPI6	DCP1A	PMA:AR02	-0.758129	10.2279	-2.19972	0.0431461	0.22284	-4.01031
Q9P2J5	LARS1	PMA:AR02	0.24051	14.1299	2.19711	0.0433641	0.223754	-4.0147
Q13586	STIM1	PMA:AR02	0.338223	14.4748	2.19373	0.0436477	0.225004	-4.02038
Q9NY27	PPP4R2	PMA:AR02	-0.362182	12.1212	-2.19099	0.0438796	0.22586	-4.025
Q9H269	VPS16	PMA:AR02	0.262427	14.3237	2.19012	0.043953	0.22586	-4.02645
Q9P2E5	CHPF2	PMA:AR02	0.83595	15.2379	2.19009	0.0439556	0.22586	-4.02651
Q15653	NFKBIB	PMA:AR02	1.11787	11.7673	2.18981	0.0439793	0.22586	-4.02698
O00116	AGPS	PMA:AR02	0.389367	13.8032	2.18612	0.0442934	0.227068	-4.03317
O60674	JAK2	PMA:AR02	0.485798	11.7099	2.18525	0.0443674	0.227068	-4.03463
Q99728	BARD1	PMA:AR02	-0.986316	17.3338	-2.18484	0.0444024	0.227068	-4.03531
O43516	WIPF1	PMA:AR02	0.213518	17.0195	2.18458	0.0444253	0.227068	-4.03576
O15258	RER1	PMA:AR02	-0.611578	13.0361	-2.18448	0.0444334	0.227068	-4.03592
P51991	HNRNPA3	PMA:AR02	0.23012	15.8702	2.18412	0.0444644	0.227068	-4.03653
Q9Y2H1	STK38L	PMA:AR02	0.419104	13.6338	2.18315	0.0445478	0.227281	-4.03816
O75533	SF3B1	PMA:AR02	0.302692	15.3377	2.18055	0.044771	0.227565	-4.04251
P16930	FAH	PMA:AR02	0.301482	15.8841	2.18036	0.0447875	0.227565	-4.04283
O43707	ACTN4	PMA:AR02	0.297269	17.7611	2.18018	0.0448032	0.227565	-4.04314
Q7L7V1	DHX32	PMA:AR02	-1.05208	12.8321	-2.1801	0.0448095	0.227565	-4.04326
O43678	NDUFA2	PMA:AR02	0.372882	14.7919	2.17988	0.044829	0.227565	-4.04364
P29350	PTPN6	PMA:AR02	0.286047	17.3823	2.17832	0.0449639	0.227565	-4.04625
O00308	WWP2	PMA:AR02	0.30156	13.3902	2.17811	0.0449823	0.227565	-4.04661
O75116	ROCK2	PMA:AR02	0.3155	15.9386	2.17769	0.0450182	0.227565	-4.0473
Q6YN16	HSDL2	PMA:AR02	-0.325747	12.9831	-2.17733	0.0450493	0.227565	-4.0479
Q8WVM8	SCFD1	PMA:AR02	0.291298	14.6173	2.17724	0.0450573	0.227565	-4.04806
Q92597	NDRG1	PMA:AR02	0.466677	11.6916	2.17718	0.0450624	0.227565	-4.04816
Q8IWZ8	SUGP1	PMA:AR02	0.516535	11.9997	2.17428	0.045315	0.228579	-4.05302
Q9BZJ0	CRNKL1	PMA:AR02	0.388148	13.1213	2.17373	0.0453627	0.228579	-4.05393
P47985	UQCRFS1	PMA:AR02	0.978621	13.3122	2.17343	0.0453889	0.228579	-4.05444
P36969	GPX4	PMA:AR02	0.551084	15.1167	2.16851	0.0458205	0.230483	-4.06267
Q9UKA9	PTBP2	PMA:AR02	-1.01164	15.0014	-2.16816	0.0458515	0.230483	-4.06325
Q99698	LYST	PMA:AR02	0.2687	13.3178	2.16595	0.0460462	0.231171	-4.06694
P50402	EMD	PMA:AR02	0.40606	13.1937	2.16565	0.046073	0.231171	-4.06744
Q9Y315	DERA	PMA:AR02	0.306085	13.9533	2.16411	0.0462098	0.231643	-4.07002
Q5HYW2		PMA:AR02	0.450377	13.4543	2.16194	0.0464025	0.232396	-4.07364
Q9BYW2	SETD2	PMA:AR02	1.78325	12.0257	2.16142	0.0464487	0.232414	-4.0745
Q07890	SOS2	PMA:AR02	0.314877	12.5718	2.16044	0.0465364	0.232639	-4.07614
Q16595	FXN	PMA:AR02	-0.601807	11.9698	-2.15992	0.0465827	0.232657	-4.077
Q92734	TFG	PMA:AR02	0.308341	13.9147	2.15799	0.0467553	0.233136	-4.08022
O94819	KBTBD11	PMA:AR02	0.325827	14.4064	2.1579	0.046764	0.233136	-4.08038
P15121	AKR1B1	PMA:AR02	0.510485	13.0194	2.157	0.0468445	0.233324	-4.08187
Q16594	TAF9	PMA:AR02	0.514397	13.5345	2.15574	0.046958	0.233527	-4.08397
Q86U86	PBRM1	PMA:AR02	0.299772	13.8129	2.1556	0.0469708	0.233527	-4.08421
Q96QC0	PPP1R10	PMA:AR02	-0.327258	11.9793	-2.15401	0.0471143	0.233856	-4.08686
Q7L211	ABHD13	PMA:AR02	0.649417	10.3904	2.15391	0.0471227	0.233856	-4.08701
A0AVT1	UBA6	PMA:AR02	0.234431	14.6623	2.15334	0.0471748	0.233901	-4.08797
Q9BUV8	RAB5IF	PMA:AR02	0.868263	13.0322	2.15215	0.0472825	0.234222	-4.08995
Q12906	ILF3	PMA:AR02	0.201011	16.0828	2.1513	0.0473593	0.23439	-4.09136
P61077	UBE2D3	PMA:AR02	1.08148	17.4	2.15025	0.0474545	0.234648	-4.0931
O75832	PSMD10	PMA:AR02	0.567889	12.5305	2.14858	0.0476074	0.234742	-4.0959
P55160	NCKAP1L	PMA:AR02	0.237344	15.9326	2.14804	0.0476561	0.234742	-4.09678
P13798	APEH	PMA:AR02	-0.223806	15.7176	-2.1476	0.0476963	0.234742	-4.09752
Q13733	ATP1A4	PMA:AR02	0.412307	14.7117	2.14689	0.0477616	0.234742	-4.0987
Q9NRC8	SIRT7	PMA:AR02	0.900651	10.0723	2.14679	0.0477705	0.234742	-4.09886
P21399	ACO1	PMA:AR02	0.331742	15.4253	2.14669	0.0477801	0.234742	-4.09904
Q6PCT2	FBXL19	PMA:AR02	0.720713	11.2696	2.14633	0.0478124	0.234742	-4.09962
Q9BSD7	NTPCR	PMA:AR02	0.600331	12.4134	2.14628	0.0478178	0.234742	-4.09972
Q9UBE0	SAE1	PMA:AR02	-0.336398	13.7198	-2.14527	0.0479103	0.234773	-4.1014
Q96KR1	ZFR	PMA:AR02	0.30742	12.6293	2.14468	0.0479646	0.234773	-4.10238
Q9UHD2	TBK1	PMA:AR02	0.252677	13.1131	2.14413	0.0480144	0.234773	-4.10328
Q15018	ABRAXAS2	PMA:AR02	0.317087	13.2889	2.144	0.048027	0.234773	-4.10351
A6NGU5		PMA:AR02	-0.535589	13.2338	-2.14386	0.0480394	0.234773	-4.10373
Q12974	PTP4A2	PMA:AR02	0.397861	13.2199	2.14229	0.0481843	0.235271	-4.10635
Q7Z5L2	R3HCC1L	PMA:AR02	-0.612385	12.3001	-2.14169	0.0482398	0.235331	-4.10734
Q9NT62	ATG3	PMA:AR02	-0.400015	14.5134	-2.14	0.0483958	0.235587	-4.11014
P07814	EPRS1	PMA:AR02	0.314949	14.6204	2.13995	0.0484004	0.235587	-4.11023
Q9UG63	ABCF2	PMA:AR02	-0.40071	11.8461	-2.13972	0.0484219	0.235587	-4.11061
Q9BYI3	HYCC1	PMA:AR02	0.728042	11.0603	2.13827	0.048556	0.235892	-4.11301
O14727	APAF1	PMA:AR02	0.291305	15.3561	2.13811	0.0485711	0.235892	-4.11328
Q8WXI2	CNKSR2	PMA:AR02	0.565155	10.7447	2.13646	0.0487244	0.236317	-4.11601
Q53FA7	TP53I3	PMA:AR02	0.256301	14.9828	2.13624	0.0487453	0.236317	-4.11638
P10523	SAG	PMA:AR02	-0.568151	11.6537	-2.13483	0.0488775	0.236748	-4.11873
Q9H9G7	AGO3	PMA:AR02	0.30714	12.7547	2.13356	0.0489958	0.23711	-4.12083
O15294	OGT	PMA:AR02	0.314713	12.5758	2.13282	0.0490653	0.237236	-4.12205
Q86VS8	HOOK3	PMA:AR02	0.434212	17.026	2.13199	0.0491433	0.23727	-4.12343
P02042	HBD	PMA:AR02	-0.536668	20.7467	-2.13182	0.0491594	0.23727	-4.12371
Q6NXE6	ARMC6	PMA:AR02	-0.372258	11.6781	-2.1298	0.0493496	0.237827	-4.12706
Q5VT06	CEP350	PMA:AR02	0.272017	14.7235	2.12955	0.0493731	0.237827	-4.12747
Q8N1I0	DOCK4	PMA:AR02	-0.417717	15.6999	-2.12871	0.049452	0.237827	-4.12885
Q96DM3	RMC1	PMA:AR02	0.269655	13.4927	2.12838	0.0494833	0.237827	-4.1294
P26599	PTBP1	PMA:AR02	0.341531	16.9468	2.12828	0.0494928	0.237827	-4.12957
Q8N584	TTC39C	PMA:AR02	-0.369286	11.8298	-2.12723	0.0495918	0.238093	-4.1313
Q9NQX3	GPHN	PMA:AR02	0.363489	12.686	2.12496	0.0498074	0.238457	-4.13506
P52907	CAPZA1	PMA:AR02	0.433905	18.3899	2.12489	0.0498146	0.238457	-4.13518
Q15532	SS18	PMA:AR02	-0.974665	10.9472	-2.12437	0.049864	0.238457	-4.13604
Q9HCP0	CSNK1G1	PMA:AR02	-0.370509	13.0206	-2.12421	0.0498792	0.238457	-4.1363
P82909	MRPS36	PMA:AR02	0.480086	12.0351	2.12414	0.0498862	0.238457	-4.13643
P13929	ENO3	PMA:AR02	0.945184	15.2743	2.12292	0.050002	0.238762	-4.13843
Q9NPB8	GPCPD1	PMA:AR02	0.341571	13.834	2.12244	0.0500476	0.238762	-4.13922
Q2TB10	ZNF800	PMA:AR02	0.316952	15.1343	2.12209	0.0500813	0.238762	-4.13981
Q14686	NCOA6	PMA:AR02	0.44466	11.6378	2.12133	0.050154	0.238804	-4.14106
Q6DN03		PMA:AR02	0.99576	16.9598	2.12108	0.0501778	0.238804	-4.14147
P54098	POLG	PMA:AR02	0.855641	9.26808	2.12031	0.0502522	0.23895	-4.14275
P55008	AIF1	PMA:AR02	-0.531539	14.7222	-2.11934	0.0503449	0.239051	-4.14435
Q14088	RAB33A	PMA:AR02	0.319645	13.9346	2.11917	0.0503612	0.239051	-4.14463
Q99747	NAPG	PMA:AR02	-0.307062	13.3272	-2.11826	0.0504488	0.239062	-4.14613
O00429	DNM1L	PMA:AR02	0.262846	15.1759	2.11824	0.0504511	0.239062	-4.14617
Q8NFH5	NUP35	PMA:AR02	0.407733	12.0714	2.11725	0.0505464	0.239306	-4.14781
Q96FF9	CDCA5	PMA:AR02	-0.326707	17.7588	-2.11666	0.0506027	0.239364	-4.14877
Q86X52	CHSY1	PMA:AR02	0.385848	11.6615	2.1118	0.0510743	0.241248	-4.15679
Q7Z5K2	WAPL	PMA:AR02	0.32833	11.9984	2.11164	0.0510893	0.241248	-4.15705
O75150	RNF40	PMA:AR02	0.509625	12.2651	2.11107	0.0511448	0.241301	-4.15799
Q9Y3E1	HDGFL3	PMA:AR02	0.823634	10.74	2.10923	0.0513247	0.241528	-4.16102
A6NHR9	SMCHD1	PMA:AR02	0.207987	14.5081	2.10919	0.0513287	0.241528	-4.16109
Q14699	RFTN1	PMA:AR02	0.9097	9.46832	2.10916	0.0513319	0.241528	-4.16114
P57772	EEFSEC	PMA:AR02	0.324172	13.5905	2.10877	0.0513701	0.241528	-4.16179
Q9P015	MRPL15	PMA:AR02	0.604315	10.6148	2.10716	0.0515277	0.24206	-4.16443
Q71F56	MED13L	PMA:AR02	0.928263	11.0469	2.10607	0.0516346	0.242354	-4.16623
P43490	NAMPT	PMA:AR02	0.399718	18.754	2.10505	0.0517348	0.242615	-4.1679
Q04721	NOTCH2	PMA:AR02	0.398421	11.7512	2.10423	0.0518156	0.242786	-4.16925
Q9NX00	TMEM160	PMA:AR02	0.585757	12.9931	2.10315	0.0519224	0.243008	-4.17103
Q96J42	TXNDC15	PMA:AR02	1.00972	9.70953	2.10285	0.0519522	0.243008	-4.17153
Q96P16	RPRD1A	PMA:AR02	0.924012	11.399	2.10195	0.0520416	0.243141	-4.17301
Q9H3G5	CPVL	PMA:AR02	0.491077	12.5429	2.10166	0.0520698	0.243141	-4.17348
P50213	IDH3A	PMA:AR02	0.222829	13.0113	2.10104	0.0521314	0.243221	-4.1745
P23396	RPS3	PMA:AR02	0.266518	16.3961	2.09973	0.0522617	0.243226	-4.17666
Q9Y2U8	LEMD3	PMA:AR02	0.413356	11.3397	2.09951	0.0522828	0.243226	-4.17701
Q15013	MAD2L1BP	PMA:AR02	1.34534	11.2187	2.09919	0.0523148	0.243226	-4.17754
O95248	SBF1	PMA:AR02	0.293983	12.8177	2.09914	0.0523199	0.243226	-4.17762
P27816	MAP4	PMA:AR02	0.315975	13.8257	2.09878	0.0523556	0.243226	-4.17821
Q13432	UNC119	PMA:AR02	0.423269	11.8684	2.09671	0.0525626	0.243646	-4.18162
P51532	SMARCA4	PMA:AR02	0.351379	15.476	2.09655	0.052578	0.243646	-4.18187
Q92615	LARP4B	PMA:AR02	0.456926	12.7836	2.09653	0.05258	0.243646	-4.1819
Q69YN2	CWF19L1	PMA:AR02	0.231796	13.5883	2.096	0.052633	0.243685	-4.18277
P45954	ACADSB	PMA:AR02	0.383583	12.6049	2.09514	0.0527198	0.243879	-4.18419
Q07954	LRP1	PMA:AR02	0.867781	12.6464	2.09405	0.0528289	0.244177	-4.18598
Q96JJ7	TMX3	PMA:AR02	0.479725	13.6689	2.09349	0.0528848	0.244228	-4.18689
O75676	RPS6KA4	PMA:AR02	0.55894	12.2068	2.09302	0.0529328	0.244243	-4.18768
Q5VWZ2	LYPLAL1	PMA:AR02	0.398933	13.0492	2.09182	0.0530534	0.244587	-4.18964
O60763	USO1	PMA:AR02	0.338249	15.6867	2.09139	0.053097	0.244587	-4.19035
Q9UJY5	GGA1	PMA:AR02	0.249875	13.4342	2.09029	0.0532076	0.244835	-4.19215
Q14C86	GAPVD1	PMA:AR02	0.232513	13.8308	2.08984	0.0532527	0.244835	-4.19288
Q96MU7	YTHDC1	PMA:AR02	-0.570372	12.6481	-2.08952	0.0532855	0.244835	-4.19341
O95777	LSM8	PMA:AR02	0.850911	11.5065	2.08764	0.0534763	0.245306	-4.19649
Q14554	PDIA5	PMA:AR02	0.323993	13.3372	2.08762	0.0534779	0.245306	-4.19652
Q9H875	PRKRIP1	PMA:AR02	0.594178	10.6203	2.08658	0.0535833	0.245574	-4.19822
O15050	TRANK1	PMA:AR02	0.381822	14.9831	2.08616	0.0536264	0.245574	-4.19891
Q9NW68	BSDC1	PMA:AR02	-0.382603	11.6198	-2.08545	0.0536988	0.2456	-4.20007
P07951	TPM2	PMA:AR02	-0.612383	14.5824	-2.08522	0.0537221	0.2456	-4.20045
Q9H910	JPT2	PMA:AR02	0.435902	11.4594	2.08232	0.0540187	0.246671	-4.2052
Q14156	EFR3A	PMA:AR02	0.274276	13.04	2.08197	0.0540549	0.246671	-4.20577
Q96GK7	FAHD2A	PMA:AR02	0.434485	13.0385	2.08123	0.0541308	0.246671	-4.20699
P28039	AOAH	PMA:AR02	-0.627056	11.1824	-2.08116	0.0541374	0.246671	-4.20709
Q7L5N1	COPS6	PMA:AR02	0.298387	13.5723	2.0802	0.0542365	0.246916	-4.20867
Q7L9L4	MOB1B	PMA:AR02	0.336929	14.0313	2.07954	0.0543038	0.247007	-4.20974
Q9UI12	ATP6V1H	PMA:AR02	0.32683	15.2701	2.07913	0.0543469	0.247007	-4.21042
P43686	PSMC4	PMA:AR02	-0.228354	14.9177	-2.0778	0.0544833	0.24742	-4.21258
P51970	NDUFA8	PMA:AR02	0.389047	12.9109	2.07617	0.0546518	0.247811	-4.21524
Q8N3D4	EHBP1L1	PMA:AR02	0.339488	12.7812	2.07609	0.0546601	0.247811	-4.21537
Q3B726	POLR1F	PMA:AR02	0.906696	11.1196	2.07461	0.0548143	0.248153	-4.2178
P49840	GSK3A	PMA:AR02	0.34335	12.9277	2.07432	0.0548438	0.248153	-4.21826
Q8IYB3	SRRM1	PMA:AR02	0.29993	13.7826	2.07383	0.0548956	0.248153	-4.21908
Q02086	SP2	PMA:AR02	0.526987	11.9388	2.07361	0.0549176	0.248153	-4.21942
P63244	RACK1	PMA:AR02	0.291917	16.1593	2.07131	0.0551574	0.24903	-4.22318
Q9HCK8	CHD8	PMA:AR02	0.482873	11.5274	2.07083	0.0552082	0.249053	-4.22397
Q9H944	MED20	PMA:AR02	-0.551025	11.2084	-2.07037	0.0552556	0.249061	-4.22471
Q13232	NME3	PMA:AR02	0.736834	12.2355	2.0694	0.0553578	0.249316	-4.2263
Q9H3S7	PTPN23	PMA:AR02	0.257936	13.0321	2.06823	0.0554805	0.249662	-4.22821
P21580	TNFAIP3	PMA:AR02	0.346	12.2729	2.06655	0.0556574	0.250252	-4.23095
P23284	PPIB	PMA:AR02	-0.262443	17.7589	-2.06442	0.0558821	0.250793	-4.23442
P17706	PTPN2	PMA:AR02	0.36069	12.9882	2.06428	0.055897	0.250793	-4.23464
P18077	RPL35A	PMA:AR02	-1.66979	13.5454	-2.06405	0.0559211	0.250793	-4.23502
Q5T440	IBA57	PMA:AR02	0.533461	11.3954	2.06339	0.055991	0.250793	-4.23609
Q9NUX5	POT1	PMA:AR02	-0.663016	10.5602	-2.06293	0.0560397	0.250793	-4.23684
Q8NBS9	TXNDC5	PMA:AR02	0.340753	14.1664	2.06279	0.0560537	0.250793	-4.23705
Q15223	NECTIN1	PMA:AR02	0.657174	10.7083	2.0622	0.0561171	0.250871	-4.23803
P08236	GUSB	PMA:AR02	0.271206	15.7754	2.06083	0.0562628	0.251088	-4.24026
A8MW92	PHF20L1	PMA:AR02	0.542893	11.6776	2.06039	0.0563093	0.251088	-4.24097
P19784	CSNK2A2	PMA:AR02	-0.408544	13.2198	-2.06001	0.0563492	0.251088	-4.24158
P31948	STIP1	PMA:AR02	-0.234094	16.7871	-2.05989	0.0563628	0.251088	-4.24179
O14818	PSMA7	PMA:AR02	-0.303447	17.4139	-2.05927	0.0564283	0.251088	-4.24279
Q53TN4	CYBRD1	PMA:AR02	-0.486334	14.7427	-2.05854	0.0565066	0.251088	-4.24398
Q9H7B2	RPF2	PMA:AR02	-0.609029	9.86452	-2.05839	0.0565219	0.251088	-4.24421
O14617	AP3D1	PMA:AR02	0.226856	14.6512	2.05804	0.0565598	0.251088	-4.24479
Q9Y4Z0	LSM4	PMA:AR02	0.49107	14.0005	2.05773	0.0565933	0.251088	-4.2453
Q9Y4E8	USP15	PMA:AR02	0.270457	13.9576	2.05718	0.0566521	0.251088	-4.24619
Q00577	PURA	PMA:AR02	0.568405	12.2565	2.05663	0.0567105	0.251088	-4.24708
Q969M3	YIPF5	PMA:AR02	0.511345	13.9366	2.05548	0.0568335	0.251088	-4.24894
O15027	SEC16A	PMA:AR02	0.27524	14.1946	2.0554	0.0568425	0.251088	-4.24908
P30154	PPP2R1B	PMA:AR02	0.340554	12.199	2.05539	0.0568436	0.251088	-4.24909
Q8N4C6	NIN	PMA:AR02	0.211077	15.3338	2.05527	0.0568563	0.251088	-4.24929
Q9NY12	GAR1	PMA:AR02	-0.257286	13.9946	-2.05435	0.0569555	0.251323	-4.25078
Q92616	GCN1	PMA:AR02	0.216969	14.1081	2.05294	0.0571069	0.251649	-4.25307
Q8TDX7	NEK7	PMA:AR02	0.358652	13.1361	2.05281	0.0571216	0.251649	-4.25329
P30519	HMOX2	PMA:AR02	0.267205	14.0629	2.05157	0.0572551	0.251949	-4.2553
Q8WWW0	RASSF5	PMA:AR02	-0.260663	14.3292	-2.05132	0.0572821	0.251949	-4.2557
Q9BTU6	PI4K2A	PMA:AR02	-0.43241	12.2016	-2.05077	0.057342	0.251992	-4.2566
Q15437	SEC23B	PMA:AR02	0.271873	14.4695	2.05037	0.0573844	0.251992	-4.25723
Q9BUJ2	HNRNPUL1	PMA:AR02	0.358929	15.5337	2.047	0.0577504	0.253131	-4.2627
O14841	OPLAH	PMA:AR02	0.309185	12.9671	2.04677	0.0577764	0.253131	-4.26309
O95989	NUDT3	PMA:AR02	0.333137	13.8438	2.04671	0.0577829	0.253131	-4.26318
Q86X83	COMMD2	PMA:AR02	-0.709518	13.5788	-2.04546	0.0579189	0.253523	-4.2652
Q6YBV0	SLC36A4	PMA:AR02	-0.73514	9.74215	-2.04306	0.0581813	0.254467	-4.26908
Q9H4E7	DEF6	PMA:AR02	0.432404	15.373	2.04194	0.0583045	0.254508	-4.2709
Q5TFE4	NT5DC1	PMA:AR02	0.445399	12.2092	2.04115	0.0583918	0.254508	-4.27219
Q9Y5L0	TNPO3	PMA:AR02	0.350912	15.0379	2.04097	0.0584112	0.254508	-4.27247
Q9H1Z4	WDR13	PMA:AR02	0.286687	12.1271	2.0409	0.0584189	0.254508	-4.27258
Q9H488	POFUT1	PMA:AR02	0.379716	12.9241	2.04075	0.0584349	0.254508	-4.27282
Q9HBH0	RHOF	PMA:AR02	-0.302044	13.5491	-2.04001	0.0585169	0.254508	-4.27402
Q8IUD2	ERC1	PMA:AR02	0.456665	15.1661	2.04001	0.0585173	0.254508	-4.27403
Q9HAS0	C17orf75	PMA:AR02	-0.746672	10.9094	-2.039	0.0586281	0.254787	-4.27565
Q8IYS1	PM20D2	PMA:AR02	0.650863	11.1555	2.03835	0.0587005	0.254898	-4.27671
P01834		PMA:AR02	0.380571	14.0993	2.03792	0.0587471	0.254898	-4.27739
Q96JN0	LCOR	PMA:AR02	0.742392	12.5344	2.0364	0.0589155	0.255273	-4.27985
Q9NXR7	BABAM2	PMA:AR02	0.365169	13.3596	2.0363	0.0589271	0.255273	-4.28002
Q86YV0	RASAL3	PMA:AR02	0.266593	15.304	2.03467	0.0591079	0.255853	-4.28265
P0CJ78	ZNF865	PMA:AR02	0.808197	9.88332	2.03263	0.0593357	0.256369	-4.28595
P08473	MME	PMA:AR02	0.493252	15.1402	2.03238	0.0593635	0.256369	-4.28635
Q16513	PKN2	PMA:AR02	0.273702	12.6502	2.03234	0.0593682	0.256369	-4.28642
P11177	PDHB	PMA:AR02	-0.284033	13.5893	-2.03098	0.0595198	0.256763	-4.28861
P20585	MSH3	PMA:AR02	0.3226	15.0319	2.02997	0.0596327	0.256763	-4.29023
Q13363	CTBP1	PMA:AR02	0.233849	15.2939	2.02967	0.0596666	0.256763	-4.29072
P83876	TXNL4A	PMA:AR02	0.562094	10.975	2.02944	0.0596931	0.256763	-4.2911
Q8TD55	PLEKHO2	PMA:AR02	0.289697	15.3392	2.02942	0.0596947	0.256763	-4.29112
Q9NVS9	PNPO	PMA:AR02	-0.342968	13.3703	-2.02851	0.059797	0.256829	-4.29259
P13498	CYBA	PMA:AR02	-0.478953	17.9918	-2.02845	0.0598043	0.256829	-4.2927
O75569	PRKRA	PMA:AR02	0.479324	12.065	2.02688	0.0599801	0.257281	-4.29521
O95394	PGM3	PMA:AR02	0.34524	13.1794	2.02613	0.0600651	0.257281	-4.29643
P15927	RPA2	PMA:AR02	0.360764	14.5674	2.02573	0.06011	0.257281	-4.29707
Q9NNW7	TXNRD2	PMA:AR02	0.426387	11.7485	2.02484	0.0602113	0.257281	-4.29851
Q8NB66	UNC13C	PMA:AR02	1.00999	15.2763	2.02409	0.0602959	0.257281	-4.29972
P80303	NUCB2	PMA:AR02	0.390457	13.0368	2.02406	0.0602991	0.257281	-4.29976
Q9Y4A5	TRRAP	PMA:AR02	0.224364	13.7657	2.0233	0.0603859	0.257281	-4.30099
Q9UPZ9	CILK1	PMA:AR02	0.411831	12.3623	2.02228	0.0605012	0.257281	-4.30263
P12236	SLC25A6	PMA:AR02	-0.383098	14.0735	-2.02178	0.0605578	0.257281	-4.30343
O95602	POLR1A	PMA:AR02	0.467079	14.921	2.02112	0.0606334	0.257281	-4.3045
Q6DD87	ZNF787	PMA:AR02	0.411479	11.9009	2.02067	0.0606849	0.257281	-4.30523
P25445	FAS	PMA:AR02	1.05566	10.7327	2.02065	0.0606871	0.257281	-4.30526
Q9HD42	CHMP1A	PMA:AR02	-0.806835	13.5952	-2.02035	0.0607206	0.257281	-4.30573
Q8NCE2	MTMR14	PMA:AR02	0.339112	12.0218	2.01962	0.0608044	0.257281	-4.30691
Q8WU79	SMAP2	PMA:AR02	0.245199	15.6271	2.01955	0.0608122	0.257281	-4.30702
Q5SZL2	CEP85L	PMA:AR02	0.797904	13.2753	2.01946	0.0608224	0.257281	-4.30717
Q9Y450	HBS1L	PMA:AR02	0.256838	12.708	2.01906	0.0608681	0.257281	-4.30781
Q6P5R6	RPL22L1	PMA:AR02	-1.21735	17.8712	-2.01897	0.0608787	0.257281	-4.30796
O95169	NDUFB8	PMA:AR02	0.431676	13.6336	2.01871	0.0609076	0.257281	-4.30837
Q92506	HSD17B8	PMA:AR02	0.330899	12.6493	2.0187	0.0609098	0.257281	-4.3084
Q92844	TANK	PMA:AR02	0.417554	12.9303	2.01868	0.0609119	0.257281	-4.30843
P01876		PMA:AR02	0.714835	12.6536	2.01831	0.0609534	0.257281	-4.30901
Q15054	POLD3	PMA:AR02	0.423772	16.4391	2.01795	0.0609945	0.257281	-4.30959
Q8WWI1	LMO7	PMA:AR02	0.696311	12.9375	2.01667	0.0611419	0.25742	-4.31165
Q8NB16	MLKL	PMA:AR02	0.25532	14.9662	2.01613	0.0612037	0.25742	-4.31252
Q13409	DYNC1I2	PMA:AR02	-0.762104	12.0706	-2.01603	0.0612151	0.25742	-4.31268
Q02539	H1-1	PMA:AR02	0.830528	16.0319	2.01602	0.0612162	0.25742	-4.31269
Q9GZV4	EIF5A2	PMA:AR02	-0.593064	13.8855	-2.01512	0.0613203	0.257518	-4.31415
Q15075	EEA1	PMA:AR02	0.251552	14.1871	2.015	0.0613341	0.257518	-4.31434
Q8WU39	MZB1	PMA:AR02	0.485455	12.1399	2.01413	0.0614334	0.257572	-4.31573
Q9BRV8	SIKE1	PMA:AR02	0.240056	13.0728	2.01406	0.0614414	0.257572	-4.31584
Q9Y490	TLN1	PMA:AR02	0.242612	18.338	2.01333	0.0615259	0.257605	-4.31701
P28340	POLD1	PMA:AR02	-0.685713	10.2381	-2.01284	0.0615831	0.257605	-4.31781
P25105	PTAFR	PMA:AR02	1.00981	10.1063	2.01277	0.061591	0.257605	-4.31792
Q8WUF8	FAM172A	PMA:AR02	-0.434318	11.3441	-2.01221	0.0616558	0.257679	-4.31882
Q13813	SPTAN1	PMA:AR02	0.291426	16.7989	2.01173	0.0617106	0.25771	-4.31958
Q10713	PMPCA	PMA:AR02	0.312328	12.4105	2.01114	0.061779	0.257799	-4.32053
P03928	ATP8	PMA:AR02	0.419744	12.4479	2.01011	0.0618989	0.257884	-4.32219
P62136	PPP1CA	PMA:AR02	0.384901	17.109	2.00987	0.0619263	0.257884	-4.32257
Q9H019	MTFR1L	PMA:AR02	0.702493	11.0555	2.00974	0.0619412	0.257884	-4.32277
P60981	DSTN	PMA:AR02	-0.419315	14.2645	-2.00855	0.0620794	0.258262	-4.32468
Q16881	TXNRD1	PMA:AR02	0.294577	15.0582	2.00674	0.0622902	0.258752	-4.32758
Q8N9N7	LRRC57	PMA:AR02	0.299284	14.9101	2.00673	0.0622921	0.258752	-4.32761
P61803	DAD1	PMA:AR02	-0.377858	15.0252	-2.00571	0.0624111	0.259049	-4.32924
Q15942	ZYX	PMA:AR02	0.301725	17.1031	2.00473	0.0625261	0.259157	-4.33082
Q969F9	HPS3	PMA:AR02	-0.409183	13.0302	-2.00467	0.0625323	0.259157	-4.3309
Q03519	TAP2	PMA:AR02	0.463471	15.0797	2.00109	0.0629533	0.260704	-4.33664
Q7KZI7	MARK2	PMA:AR02	0.380161	14.7199	2.00047	0.0630255	0.260805	-4.33762
Q9Y4D8		PMA:AR02	0.825488	14.6858	1.99952	0.0631377	0.260958	-4.33914
Q687X5	STEAP4	PMA:AR02	0.441427	13.6974	1.99916	0.0631802	0.260958	-4.33971
Q9Y3U8	RPL36	PMA:AR02	0.473302	15.737	1.99885	0.0632176	0.260958	-4.34022
Q9UMS0	NFU1	PMA:AR02	0.30663	12.2516	1.99798	0.0633199	0.260958	-4.3416
O43847	NRDC	PMA:AR02	0.312567	13.1987	1.99727	0.0634049	0.260958	-4.34275
P53384	NUBP1	PMA:AR02	0.396223	14.335	1.99718	0.0634149	0.260958	-4.34288
Q5JPI9	EEF1AKMT2	PMA:AR02	0.655329	11.3056	1.99701	0.063435	0.260958	-4.34315
O75179	ANKRD17	PMA:AR02	0.460767	11.2891	1.99693	0.0634453	0.260958	-4.34329
O75530	EED	PMA:AR02	0.280004	12.6802	1.99626	0.0635249	0.261043	-4.34436
P56134	ATP5MF	PMA:AR02	0.330475	17.9828	1.99539	0.0636283	0.261043	-4.34575
Q9P270	SLAIN2	PMA:AR02	0.378135	12.3118	1.99481	0.0636972	0.261043	-4.34668
Q96BY6	DOCK10	PMA:AR02	0.234854	13.4803	1.99457	0.0637255	0.261043	-4.34706
P10620	MGST1	PMA:AR02	0.313103	13.8693	1.99404	0.0637882	0.261043	-4.3479
P05388	RPLP0	PMA:AR02	0.31	15.5843	1.994	0.0637931	0.261043	-4.34796
Q9BTT0	ANP32E	PMA:AR02	0.488782	17.1782	1.99393	0.063801	0.261043	-4.34807
P07203	GPX1	PMA:AR02	0.23955	15.906	1.99305	0.0639064	0.261278	-4.34948
P41212	ETV6	PMA:AR02	0.815755	9.75363	1.99169	0.0640697	0.26149	-4.35166
O15381	NVL	PMA:AR02	0.90349	9.76407	1.99139	0.0641052	0.26149	-4.35213
P24928	POLR2A	PMA:AR02	0.336789	13.2348	1.99134	0.0641113	0.26149	-4.35222
P16455		PMA:AR02	0.473221	11.2481	1.99102	0.0641498	0.26149	-4.35273
Q8TEX9	IPO4	PMA:AR02	0.223705	14.2608	1.9891	0.0643803	0.262157	-4.35579
Q9ULK4	MED23	PMA:AR02	0.20127	13.7671	1.98885	0.0644098	0.262157	-4.35618
P55957	BID	PMA:AR02	0.386423	17.5537	1.98819	0.0644899	0.262288	-4.35724
Q8IX12	CCAR1	PMA:AR02	0.384332	12.6707	1.98713	0.0646173	0.262443	-4.35893
Q13610	PWP1	PMA:AR02	-0.747485	9.73988	-1.98707	0.0646242	0.262443	-4.35902
Q16134	ETFDH	PMA:AR02	0.269972	12.6361	1.98593	0.0647623	0.262624	-4.36084
P59998	ARPC4	PMA:AR02	0.393572	19.301	1.9859	0.0647651	0.262624	-4.36088
Q9H8W4	PLEKHF2	PMA:AR02	0.590309	13.9915	1.98465	0.0649165	0.263042	-4.36287
Q96K76	USP47	PMA:AR02	0.24071	13.896	1.98381	0.0650184	0.263151	-4.36421
P28074	PSMB5	PMA:AR02	-0.357798	12.5199	-1.98356	0.0650492	0.263151	-4.36461
P10619	CTSA	PMA:AR02	-0.31655	14.4308	-1.98292	0.0651265	0.263151	-4.36563
Q9BQA1	WDR77	PMA:AR02	-0.252944	13.5541	-1.98269	0.0651546	0.263151	-4.36599
Q9H7Z6	KAT8	PMA:AR02	0.460504	11.4202	1.98217	0.065218	0.263151	-4.36682
P42677	RPS27	PMA:AR02	-0.59726	13.8062	-1.98205	0.0652328	0.263151	-4.36702
P48426	PIP4K2A	PMA:AR02	-0.312977	13.6581	-1.98151	0.0652984	0.263221	-4.36788
P43897	TSFM	PMA:AR02	-0.258566	13.0601	-1.98059	0.0654102	0.263359	-4.36934
O95793	STAU1	PMA:AR02	0.630519	12.0853	1.98043	0.0654294	0.263359	-4.36959
P02100	HBE1	PMA:AR02	-0.610284	12.2428	-1.97844	0.0656728	0.263743	-4.37275
O00442	RTCA	PMA:AR02	0.305801	14.015	1.97747	0.0657923	0.263743	-4.3743
Q9Y4X5	ARIH1	PMA:AR02	0.49643	10.9283	1.97722	0.0658221	0.263743	-4.37469
Q96CM8	ACSF2	PMA:AR02	-0.30728	11.5041	-1.97714	0.0658324	0.263743	-4.37482
Q86U42	PABPN1	PMA:AR02	-0.529849	12.2145	-1.97713	0.0658335	0.263743	-4.37484
Q96AB3	ISOC2	PMA:AR02	0.474266	12.1178	1.97702	0.0658465	0.263743	-4.37501
P20337	RAB3B	PMA:AR02	-0.772952	17.616	-1.97633	0.0659312	0.263743	-4.3761
Q9H1A7		PMA:AR02	0.419857	12.5665	1.97619	0.0659491	0.263743	-4.37633
O43681	GET3	PMA:AR02	0.208519	16.0923	1.9761	0.0659599	0.263743	-4.37647
O75132	ZBED4	PMA:AR02	0.460102	15.0293	1.97518	0.0660734	0.264003	-4.37794
Q96PE3	INPP4A	PMA:AR02	0.189947	13.0688	1.97293	0.0663505	0.264916	-4.38151
Q00535	CDK5	PMA:AR02	0.306964	13.8735	1.97219	0.0664415	0.264964	-4.38267
Q6JBY9	RCSD1	PMA:AR02	0.454155	14.776	1.97205	0.0664596	0.264964	-4.38291
P28331	NDUFS1	PMA:AR02	0.20756	14.049	1.97163	0.066511	0.264975	-4.38357
Q8IYJ3	SYTL1	PMA:AR02	0.375609	15.2709	1.97097	0.0665936	0.265111	-4.38462
Q15042	RAB3GAP1	PMA:AR02	0.31569	12.8937	1.96998	0.0667163	0.265405	-4.38619
Q8N5C6	SRBD1	PMA:AR02	0.320133	11.9092	1.96917	0.0668165	0.265534	-4.38747
P04839	CYBB	PMA:AR02	0.280529	19.4296	1.96893	0.0668461	0.265534	-4.38785
Q92556	ELMO1	PMA:AR02	0.237811	16.0279	1.96754	0.0670199	0.266031	-4.39006
O14523	C2CD2L	PMA:AR02	-0.445153	11.7681	-1.96702	0.0670845	0.266094	-4.39088
Q7Z7G8	VPS13B	PMA:AR02	0.465915	13.4081	1.96627	0.0671779	0.26627	-4.39206
Q8NFH8	REPS2	PMA:AR02	0.580649	11.7846	1.96539	0.0672876	0.266356	-4.39345
P20248	CCNA2	PMA:AR02	1.45169	13.5215	1.96532	0.0672971	0.266356	-4.39357
Q96T37	RBM15	PMA:AR02	0.382028	12.9105	1.96441	0.0674103	0.266611	-4.39501
Q8N423		PMA:AR02	0.681457	14.1904	1.96281	0.0676109	0.26721	-4.39753
P49773	HINT1	PMA:AR02	0.333048	16.0979	1.95955	0.0680228	0.268628	-4.40271
O95758	PTBP3	PMA:AR02	0.406513	14.2133	1.95919	0.0680681	0.268628	-4.40327
Q8N1F7	NUP93	PMA:AR02	0.21356	14.5334	1.95846	0.0681599	0.268795	-4.40442
Q6ZS81	WDFY4	PMA:AR02	0.281032	13.7161	1.95782	0.0682415	0.268923	-4.40544
Q99614	TTC1	PMA:AR02	0.237711	14.2377	1.95687	0.0683612	0.269037	-4.40693
Q8TD16	BICD2	PMA:AR02	-0.259717	13.225	-1.95668	0.0683852	0.269037	-4.40723
Q01831	XPC	PMA:AR02	0.399042	11.6191	1.95612	0.0684564	0.269037	-4.40811
P27824	CANX	PMA:AR02	0.435965	18.6124	1.95594	0.0684803	0.269037	-4.40841
Q96A26	FAM162A	PMA:AR02	0.682635	12.3151	1.95565	0.0685172	0.269037	-4.40887
Q9H4A3	WNK1	PMA:AR02	0.288142	13.7942	1.95523	0.0685698	0.26905	-4.40952
P08069	IGF1R	PMA:AR02	0.578992	10.7242	1.95395	0.0687326	0.269495	-4.41154
O00459	PIK3R2	PMA:AR02	0.31914	13.5201	1.95318	0.0688314	0.269631	-4.41276
Q96DG6	CMBL	PMA:AR02	0.62431	11.1724	1.95291	0.0688661	0.269631	-4.41319
Q8N1S5	SLC39A11	PMA:AR02	0.408534	13.1713	1.95223	0.0689529	0.269777	-4.41426
Q9UPM8	AP4E1	PMA:AR02	0.402905	11.1676	1.95154	0.0690414	0.26993	-4.41535
Q7L1Q6	BZW1	PMA:AR02	-0.326243	14.6478	-1.94959	0.0692915	0.270559	-4.41842
Q8TF42	UBASH3B	PMA:AR02	0.311897	13.7041	1.94951	0.0693017	0.270559	-4.41855
Q9Y6A5	TACC3	PMA:AR02	0.337211	12.3705	1.94816	0.0694746	0.271041	-4.42067
P42858	HTT	PMA:AR02	0.215532	12.8829	1.94616	0.0697333	0.271675	-4.42382
Q53F19	NCBP3	PMA:AR02	0.882503	11.9069	1.94613	0.0697368	0.271675	-4.42387
Q9BZD3		PMA:AR02	0.644462	11.4837	1.94436	0.0699657	0.272074	-4.42665
Q93052	LPP	PMA:AR02	0.501992	11.5607	1.94398	0.0700155	0.272074	-4.42725
P62330	ARF6	PMA:AR02	0.226725	17.2877	1.9439	0.0700263	0.272074	-4.42739
Q14011	CIRBP	PMA:AR02	-0.947982	12.4173	-1.9438	0.0700388	0.272074	-4.42754
Q15046	KARS1	PMA:AR02	0.24358	15.2961	1.94317	0.0701206	0.272169	-4.42853
P29590	PML	PMA:AR02	0.284798	14.4805	1.94284	0.0701631	0.272169	-4.42904
Q9UN86	G3BP2	PMA:AR02	0.383834	13.2825	1.9409	0.0704159	0.272955	-4.4321
Q53FT3	HIKESHI	PMA:AR02	0.411177	12.9013	1.94047	0.0704714	0.272977	-4.43277
Q9BVA0	KATNB1	PMA:AR02	-0.586012	10.6394	-1.93998	0.070536	0.273033	-4.43354
P55884	EIF3B	PMA:AR02	0.320688	15.053	1.93951	0.0705976	0.273077	-4.43428
Q8IUR7	ARMC8	PMA:AR02	0.314592	13.5112	1.9381	0.0707817	0.273595	-4.4365
Q9H4Z3	PCIF1	PMA:AR02	-0.320637	12.2029	-1.93672	0.070962	0.273998	-4.43866
P29353	SHC1	PMA:AR02	0.360023	13.3025	1.93654	0.0709863	0.273998	-4.43895
Q9Y5L4	TIMM13	PMA:AR02	-0.208834	14.1561	-1.93615	0.0710379	0.274003	-4.43956
P24844	MYL9	PMA:AR02	-0.481333	13.7934	-1.93505	0.0711819	0.274365	-4.44128
P51606	RENBP	PMA:AR02	0.664081	11.3983	1.93431	0.0712793	0.274546	-4.44244
Q5HYI8	RABL3	PMA:AR02	0.299486	12.8088	1.93347	0.0713896	0.274686	-4.44375
Q9BUH6	PAXX	PMA:AR02	0.274174	14.715	1.93319	0.0714268	0.274686	-4.44419
P53007	SLC25A1	PMA:AR02	-0.346727	13.4097	-1.93254	0.071513	0.274686	-4.44522
Q9H1K4	SLC25A18	PMA:AR02	-0.487012	12.6872	-1.93251	0.0715171	0.274686	-4.44527
Q15643	TRIP11	PMA:AR02	0.447444	11.3767	1.93103	0.0717126	0.27504	-4.44758
Q96F15	GIMAP5	PMA:AR02	0.440873	11.2003	1.93092	0.0717276	0.27504	-4.44776
Q9UIF9	BAZ2A	PMA:AR02	0.741723	9.83641	1.93037	0.0718004	0.27504	-4.44862
Q9NXD2	MTMR10	PMA:AR02	0.359959	14.5908	1.93021	0.0718217	0.27504	-4.44887
Q9UMS4	PRPF19	PMA:AR02	0.281388	14.207	1.92991	0.0718613	0.27504	-4.44934
O75643	SNRNP200	PMA:AR02	0.200774	14.5139	1.92913	0.0719649	0.275236	-4.45056
Q9C0J8	WDR33	PMA:AR02	0.244395	13.2522	1.9286	0.072035	0.275236	-4.45139
Q8WWM7	ATXN2L	PMA:AR02	0.307286	11.859	1.92812	0.0720993	0.275236	-4.45214
Q14624	ITIH4	PMA:AR02	0.473764	13.6626	1.92801	0.0721146	0.275236	-4.45232
Q9Y3A3	MOB4	PMA:AR02	-0.593684	11.5084	-1.92691	0.0722606	0.27549	-4.45404
O15126	SCAMP1	PMA:AR02	0.376459	13.3135	1.92675	0.072282	0.27549	-4.45429
Q13488	TCIRG1	PMA:AR02	0.295389	15.6096	1.92411	0.0726346	0.276314	-4.45841
Q16873	LTC4S	PMA:AR02	0.622381	14.741	1.9241	0.0726358	0.276314	-4.45843
Q15542	TAF5	PMA:AR02	-0.879901	11.4252	-1.92388	0.0726661	0.276314	-4.45878
O95479	H6PD	PMA:AR02	0.285049	15.0473	1.92362	0.0727009	0.276314	-4.45919
Q8WYP5	AHCTF1	PMA:AR02	0.223197	13.312	1.92199	0.072919	0.276619	-4.46172
Q9BTE6	AARSD1	PMA:AR02	-0.389394	11.6321	-1.92198	0.0729215	0.276619	-4.46175
Q96BJ3	AIDA	PMA:AR02	-0.449523	11.568	-1.92189	0.0729333	0.276619	-4.46189
Q9BT22	ALG1	PMA:AR02	0.379478	11.8445	1.92111	0.0730383	0.276825	-4.46311
Q9UJU6	DBNL	PMA:AR02	0.296934	16.6534	1.92005	0.0731806	0.277014	-4.46476
Q9H936	SLC25A22	PMA:AR02	0.679946	10.4966	1.91973	0.0732247	0.277014	-4.46527
P62877	RBX1	PMA:AR02	-0.573163	13.5322	-1.91961	0.0732405	0.277014	-4.46545
P52739	ZNF131	PMA:AR02	-0.782882	14.1758	-1.91912	0.0733063	0.277071	-4.46621
Q9P2M7	CGN	PMA:AR02	2.22727	14.2764	1.9183	0.0734175	0.277299	-4.4675
O00410	IPO5	PMA:AR02	0.205253	15.084	1.91789	0.0734731	0.277316	-4.46814
L0R6Q1		PMA:AR02	-0.442024	13.3253	-1.91581	0.0737552	0.278189	-4.47138
P25789	PSMA4	PMA:AR02	-0.27831	16.3168	-1.91361	0.0740546	0.279021	-4.47481
P48047	ATP5PO	PMA:AR02	0.253436	16.8428	1.91337	0.0740871	0.279021	-4.47518
Q15555	MAPRE2	PMA:AR02	-0.656828	11.8979	-1.91306	0.0741295	0.279021	-4.47566
Q7Z478	DHX29	PMA:AR02	-0.38325	12.1567	-1.91257	0.0741969	0.279083	-4.47643
O75503	CLN5	PMA:AR02	0.224455	14.4145	1.90953	0.074613	0.280255	-4.48117
P19823	ITIH2	PMA:AR02	0.550809	16.115	1.90917	0.0746623	0.280255	-4.48172
Q14232	EIF2B1	PMA:AR02	0.429509	12.9357	1.90917	0.0746627	0.280255	-4.48173
P08397	HMBS	PMA:AR02	0.424257	11.7896	1.90721	0.0749322	0.281073	-4.48478
Q13177	PAK2	PMA:AR02	0.293234	16.2735	1.90453	0.0753017	0.281827	-4.48893
Q8IU81	IRF2BP1	PMA:AR02	0.865447	10.84	1.90428	0.0753367	0.281827	-4.48933
Q13615	MTMR3	PMA:AR02	0.273253	13.3333	1.9042	0.0753477	0.281827	-4.48945
Q8NEZ4	KMT2C	PMA:AR02	0.274865	14.8812	1.90414	0.0753569	0.281827	-4.48956
Q14258	TRIM25	PMA:AR02	0.250667	14.3228	1.9032	0.0754864	0.281827	-4.49101
P53990	IST1	PMA:AR02	-0.375533	14.5834	-1.9032	0.0754872	0.281827	-4.49101
Q08AM6	VAC14	PMA:AR02	0.201672	13.0852	1.90314	0.0754948	0.281827	-4.4911
P06733	ENO1	PMA:AR02	0.312475	19.6647	1.90252	0.0755806	0.281915	-4.49206
O15498	YKT6	PMA:AR02	-0.334121	13.0581	-1.90223	0.0756219	0.281915	-4.49252
Q9UKD2	MRTO4	PMA:AR02	0.465748	14.7438	1.90086	0.0758118	0.28243	-4.49464
Q02252	ALDH6A1	PMA:AR02	0.268091	13.6573	1.89917	0.076047	0.283113	-4.49726
Q15785	TOMM34	PMA:AR02	0.430877	11.5704	1.89865	0.0761203	0.283192	-4.49807
Q8WZA9	IRGQ	PMA:AR02	0.325192	13.006	1.89715	0.0763301	0.283604	-4.5004
Q8NCJ5	SPRYD3	PMA:AR02	-0.529849	11.7426	-1.89712	0.0763349	0.283604	-4.50045
Q13619	CUL4A	PMA:AR02	0.372665	11.9699	1.89612	0.0764746	0.283846	-4.50199
Q9BW85	YJU2	PMA:AR02	0.533365	12.8191	1.89567	0.0765379	0.283846	-4.50269
P14174	MIF	PMA:AR02	0.350234	20.0717	1.89553	0.0765576	0.283846	-4.50291
Q8NCN5	PDPR	PMA:AR02	0.245804	13.4317	1.89517	0.0766083	0.283846	-4.50347
Q96C86	DCPS	PMA:AR02	0.308417	14.3145	1.89454	0.0766969	0.28396	-4.50444
P18084	ITGB5	PMA:AR02	0.380974	19.0142	1.89421	0.0767431	0.28396	-4.50495
Q8WUD1	RAB2B	PMA:AR02	0.408887	15.5958	1.89303	0.0769094	0.284376	-4.50678
Q6FI81	CIAPIN1	PMA:AR02	0.447676	12.5159	1.89267	0.0769599	0.284376	-4.50734
Q9NTJ5	SACM1L	PMA:AR02	0.212469	16.4119	1.89162	0.077109	0.284563	-4.50897
Q13451	FKBP5	PMA:AR02	0.286821	16.6542	1.89158	0.0771148	0.284563	-4.50903
O43390	HNRNPR	PMA:AR02	-0.254342	15.9075	-1.88997	0.0773428	0.285008	-4.51152
P32019	INPP5B	PMA:AR02	0.357611	11.8761	1.8898	0.0773669	0.285008	-4.51179
Q96KN1	LRATD2	PMA:AR02	0.792281	15.0698	1.88962	0.0773922	0.285008	-4.51206
Q9P1Y6	PHRF1	PMA:AR02	0.80202	11.5618	1.88886	0.0775003	0.285146	-4.51324
Q712K3	UBE2R2	PMA:AR02	0.623677	12.1674	1.88862	0.0775342	0.285146	-4.51361
Q9UPW5	AGTPBP1	PMA:AR02	0.234188	13.6876	1.88764	0.0776726	0.285463	-4.51511
Q8WUA7	TBC1D22A	PMA:AR02	0.253642	13.1362	1.88659	0.0778227	0.285682	-4.51674
Q9Y520	PRRC2C	PMA:AR02	0.273485	14.7702	1.88552	0.0779751	0.285682	-4.51839
Q66K14	TBC1D9B	PMA:AR02	0.232285	16.4894	1.88538	0.077996	0.285682	-4.51862
O15144	ARPC2	PMA:AR02	-0.20249	18.3032	-1.88457	0.0781116	0.285682	-4.51987
P05023	ATP1A1	PMA:AR02	0.191058	15.133	1.88443	0.0781314	0.285682	-4.52008
Q13795	ARFRP1	PMA:AR02	0.410238	10.7805	1.88413	0.0781747	0.285682	-4.52055
P06746	POLB	PMA:AR02	0.509294	11.6558	1.88388	0.0782098	0.285682	-4.52093
P68400	CSNK2A1	PMA:AR02	0.403415	13.8173	1.8838	0.078221	0.285682	-4.52105
P19623	SRM	PMA:AR02	0.295646	14.5613	1.8836	0.0782499	0.285682	-4.52136
Q96AX2	RAB37	PMA:AR02	0.364636	13.1942	1.88356	0.0782561	0.285682	-4.52143
O95140	MFN2	PMA:AR02	0.36865	11.206	1.88199	0.0784812	0.286312	-4.52385
P51858	HDGF	PMA:AR02	-0.520778	14.9356	-1.88145	0.0785582	0.286401	-4.52467
Q96TA1	NIBAN2	PMA:AR02	0.642523	10.0695	1.88042	0.0787071	0.286753	-4.52627
Q15599	NHERF2	PMA:AR02	-0.925844	9.82766	-1.87985	0.0787887	0.286858	-4.52714
P61353	RPL27	PMA:AR02	0.688969	13.1023	1.87934	0.0788627	0.286936	-4.52793
P48147	PREP	PMA:AR02	0.241166	14.0727	1.87877	0.0789446	0.287043	-4.52881
P61326	MAGOH	PMA:AR02	0.230949	15.2106	1.87823	0.0790227	0.287135	-4.52964
Q96N21	TEPSIN	PMA:AR02	0.919835	8.24603	1.87762	0.0791106	0.287263	-4.53058
Q9BTC0	DIDO1	PMA:AR02	0.303548	12.0942	1.87682	0.0792262	0.287492	-4.53181
P62979	RPS27A	PMA:AR02	0.612311	12.0866	1.87529	0.0794485	0.288098	-4.53417
Q8TC12	RDH11	PMA:AR02	0.283845	12.7106	1.87494	0.0794989	0.288098	-4.5347
Q9Y2B0	CNPY2	PMA:AR02	-0.503619	14.2051	-1.87442	0.0795751	0.288135	-4.53551
[truncated: 3,948 more rows]
